# Supplementary material for: Unraveling reaction networks behind the catalytic oxidation of methane with H2O2 over a mixed-metal MIL-53(Al,Fe) MOF catalyst
Source: PubMed Central journal article supplement — Chem Sci. 2018 Jul 20;9(33):6765–73. doi: 10.1039/c8sc02376j (PMC6113888; doi:10.1039/c8sc02376j), 2018-07-20
Supplement: SC-009-C8SC02376J-s001.pdf [file SC-009-C8SC02376J-s001.pdf]

## Supporting Information

### Unraveling reaction networks behind the catalytic oxidation of methane with H<sub>2</sub>O<sub>2</sub> over a mixed-metal MIL-53(Al,Fe) MOF catalyst

Ágnes Szécsényi,<sup>†,‡</sup> Guanna Li,<sup>‡,†</sup> Jorge Gascon,<sup>¶</sup> and Evgeny A. Pidko<sup>\*,†</sup>

<sup>†</sup>*Inorganic Systems Engineering Group, Chemical Engineering Department, Delft University of Technology, Van der Maasweg 9, 2629 HZ Delft, the Netherlands*

<sup>‡</sup>*Catalysis Engineering, Chemical Engineering Department, Delft University of Technology, Van der Maasweg 9, 2629 HZ Delft, the Netherlands*

<sup>¶</sup>*King Abdullah University of Science and Technology, KAUST Catalysis Center, Advanced Catalytic Materials, Thuwal 23955, Saudi Arabia*

E-mail: e.a.pidko@tudelft.nl

Phone: +31 1527 81938

Table S1: Relative energies of different spin states of structure **1**. S=0 is the antiferromagnetically coupled high spin state.

| Spin state | $\Delta E$ (kJ/mol) |
|------------|---------------------|
| 0          | 0                   |
| 1          | 44                  |
| 2          | 94                  |
| 3          | 45                  |
| 4          | 40                  |
| 5          | 10                  |

Table S2: The partial charge (calculated with the AIMS method) and the spin density of different spin states of the atoms of the active site of structure **1**. O is the bridging oxygen, and H is the hydrogen atom connected to it.

|     | spin state | partial charge | spin  |
|-----|------------|----------------|-------|
| Fe1 | 0          | 1.75           | 4.02  |
|     | 3          | 1.73           | 4.01  |
|     | 4          | 1.61           | 2.80  |
|     | 5          | 1.76           | 4.07  |
| Fe2 | 0          | 1.74           | -4.02 |
|     | 3          | 1.49           | 1.15  |
|     | 4          | 1.73           | 4.00  |
|     | 5          | 1.76           | 4.07  |
| O   | 0          | -1.12          | 0.00  |
|     | 3          | -1.06          | 0.12  |
|     | 4          | -1.07          | 0.08  |
|     | 5          | -1.17          | 0.23  |
| H   | 0          | 0.64           | 0.00  |
|     | 3          | 0.60           | 0.00  |
|     | 4          | 0.61           | 0.00  |
|     | 5          | 0.64           | 0.01  |

Table S3: Spin densities of the Fe atoms of different spin states of different intermediates, and the relative energies of the structures compared to the S=0 state. All structures are geometry optimized.

|       |            | S=0   | S=5         | S=4         |
|-------|------------|-------|-------------|-------------|
| 1     | Fe1        | 4.02  | <b>4.07</b> | 2.80        |
|       | Fe2        | -4.02 | <b>4.07</b> | 4.00        |
|       | $\Delta E$ | 0     | <b>10</b>   | 40          |
| 2     | Fe1        | 4.01  | <b>4.02</b> |             |
|       | Fe2        | -3.97 | <b>4.07</b> |             |
|       | $\Delta E$ | 0     | <b>11</b>   | 35          |
| CH4/3 | Fe1        | -3.04 | 3.20        | <b>3.16</b> |
|       | Fe2        | 3.02  | 3.97        | <b>3.17</b> |
|       | $\Delta E$ | 0     | 95          | <b>18</b>   |
| 4     | Fe1        | 3.13  | <b>3.24</b> | 1.85        |
|       | Fe2        | -3.96 | <b>4.02</b> | 4.01        |
|       | $\Delta E$ | 0     | <b>13</b>   | 6           |

Table S4: Partial charge and spin density of Fe atoms in structure H<sub>2</sub>O/**3** (S=4 spin state).

|     | Partial charge | Spin density |
|-----|----------------|--------------|
| Fe1 | 1.71           | 3.15         |
| Fe2 | 1.71           | 3.16         |

In the following section we list the coordinates of all calculated stable point and transition state structures in the most stable spin state (unless multiple spin states are discussed in the text or supporting information). The coordinates are in the VASP POSCAR format.

```

Structure 1 S=5
1.0000000000000000
20.9172000000000011 0.0000000000000000 0.0000000000000000
0.0000000000000000 17.8076000000000008 0.0000000000000000
0.0000000000000000 0.0000000000000000 12.2157999999999998
Al O C H Fe
10 60 96 60 2
Direct
0.0820578763908730 0.2502339743171669 0.2507564954842338
0.2490211405870645 0.7501716135805758 0.7534703363908268
0.2457664271381567 0.2501796875764181 0.2533262653848259
0.0825584365204613 0.7501403688921020 0.7504441456051590
0.5837360953511235 0.7499615615745786 0.7461137785332831
0.4161736040064197 0.7500680185777292 0.7473643960541576
0.7547358098298418 0.2499430285322858 0.2519789028659441
0.9162797053915036 0.7500960621665014 0.7505763579435969
0.9182947794346551 0.2499872488724334 0.2506719035180306
0.7502609401979792 0.7499508620194373 0.7519984571537790
0.6746260354889989 0.2499294247434478 0.1819650416744116
0.8333166570829206 0.7500489394667312 0.6862164524693783
0.9993830899115526 0.7501362381795448 0.8155140692344919
0.8364466012428954 0.2499202745395700 0.3168660104728724
0.7823719079561681 0.1703339664652455 0.1509795860885181
0.9450252597722810 0.6707710368033878 0.6499302607392925
0.8907249873373887 0.3296624701697460 0.1495793046217130
0.7223191663502140 0.8283228677031833 0.6509391521517788
0.7788160214895266 0.8294920535909528 0.8521704811909402
0.9458168056129883 0.3295211751179746 0.3518899418048066
0.8876040163901178 0.6707515592730714 0.8512006386063907
0.7263701801676807 0.1698035549670134 0.3524483189077706
0.8875284085635502 0.8292480189792003 0.8512013054901399
0.7264099950346367 0.3300679770132063 0.3524936721551453
0.7788887435333637 0.6703853063956001 0.8521101377471951
0.9459783086996608 0.1705011053753691 0.3517796459814795
0.8908027996855628 0.1702331890971293 0.1495743653523967
0.722353528638826 0.6715389057901809 0.6509337580573625
0.7822958411966007 0.3295883722801609 0.1509425553158216
0.9450476704031943 0.8294508608089560 0.6499383592787134
0.3257998335113067 0.2501066110367397 0.1826507575447437
0.4998417962663899 0.7499947238866774 0.6804401402204427
0.6666684955137868 0.7499469237719665 0.8146760983800748
0.5002052671035493 0.2499737140626118 0.3189026347579110
0.4462618343267726 0.1667021335605676 0.1412743896753049
0.6135862970830775 0.6711365356979220 0.6472374304208967
0.5549572609081608 0.3333710702848813 0.1418271078782934
0.3859668920131691 0.8288077712567798 0.6486462610501598
0.4459542468471993 0.8280208531068549 0.8465333485673340
0.6178506957274482 0.3324714202371981 0.3535606859171548
0.5547722037410047 0.6720266413544045 0.8458656274885141
0.3828300138128015 0.1668713476481536 0.3530530060195313
0.5548011126987304 0.8279428584475683 0.8458328551762786
0.3829375264615738 0.3333112282753000 0.3530414081290173
0.4459236067798435 0.6720452848423601 0.8466465234107670
0.6178210448078068 0.1673410842202194 0.3534531086087581
0.5548934837671923 0.1665918158240194 0.1418258325951465
0.3859434477666412 0.6713325139181725 0.6488071813946470
0.4463262684480349 0.3332231605277716 0.1412129439409652
0.6135558123303251 0.8287060044839611 0.6471795424863696
0.0001405713187015 0.2501483185162992 0.1855986564430451
0.1658547372779762 0.7501725906216158 0.6869393949651648
0.3330747657961532 0.7501553435174586 0.8163036056991911
0.1638444475915350 0.2502704358731400 0.3176245521016204
0.1096348708645938 0.1708205256389310 0.1496358373710056
0.2771651065603122 0.6714735495003884 0.6529729274537873
0.2181427877260708 0.3301232603810597 0.1523512436923415
0.053777217399973 0.8291934301411567 0.6497034078694449
0.1111586746123283 0.8296473546036363 0.8510957306051179
0.2743726409796717 0.3300523926275281 0.3537283997756545
0.2199299863685402 0.6709211779886797 0.8532122494128996
0.0544860736285875 0.1704567769265458 0.35169866612351619
0.2199013629843985 0.8294688431858808 0.8531911861743243
0.0543242214208949 0.3298272030368676 0.3516462544855786
0.1111866230329015 0.6705924322778132 0.8510129901409981
0.2742634571817436 0.1701501760516628 0.3536650219993502
0.2180615823886306 0.1702642892235479 0.1522315221563677
0.0537537993273946 0.6709705406469252 0.6497040841542033
0.1097153181612244 0.3296265051700905 0.1497141889170329
0.2771896730340335 0.8286768829952679 0.6528233014540303

```

0.1639838898931389 0.1422752385704039 0.1254155981975093  
0.3311520427462753 0.6433398923743200 0.6259223760535650  
0.1640815936861130 0.3581266569659544 0.1254907638793084  
0.3311792751345324 0.8567496347600301 0.6256358810046978  
0.1653836201177939 0.8579040675049511 0.8768845449573212  
0.0000324662876350 0.3580549211301159 0.3768824383522028  
0.1654347096560246 0.6423891834880573 0.8767953064544091  
0.0002305297057604 0.1420518333344382 0.3767493884221266  
0.1643492833108648 0.0695377542418736 0.0600317969865470  
0.3300268342420415 0.5706480107629345 0.5612434635999853  
0.1644844831342847 0.4308176146832572 0.0600210454037741  
0.9996104149360934 0.93045444976378809 0.5596878559241034  
0.1650540668864544 0.9312247026375396 0.9410537008897153  
0.3280960217036122 0.4330096784706505 0.4424812475139104  
0.1651671530608383 0.5690395341399902 0.9408703660464308  
0.0001324895697575 0.0688835516306278 0.4411120874104359  
0.1070117988549072 0.0348060671621058 0.0272410927517186  
0.2719546866424906 0.5350165131436850 0.5349512060065430  
0.2221973674131826 0.4665864640515631 0.0317732049342705  
0.0572522653494544 0.9645018292010591 0.5268862272372724  
0.1073589288996726 0.9671682181755682 0.9689397169856980  
0.2709790955060487 0.4674641029895765 0.4765844723964279  
0.2225287516120275 0.5342100179573362 0.9734240703774965  
0.0575257874830662 0.0322232374728808 0.4687966891580054  
0.2224034138292880 0.9661006252368199 0.9735480784818130  
0.0573332215518019 0.4676768763259490 0.4692502168348031  
0.1074822179259510 0.5330655429591581 0.9687090248056844  
0.2708876262723512 0.0323526323557551 0.4757822881630303  
0.2220609605692421 0.0337654753555329 0.0317894058781159  
0.0571243145360220 0.5354020661146636 0.5273231980438279  
0.1071448751940916 0.4654726434057994 0.0270976788445102  
0.2719044080017071 0.9647804423410558 0.5340994499123940  
0.5006086043218783 0.1381491745496725 0.1175547986479497  
0.6683817678733232 0.6433042043041323 0.6240323749825143  
0.5006705503590494 0.3617971712047949 0.1175315481144451  
0.6683533243587211 0.8565350413965220 0.6239824119353998  
0.5004617512924948 0.8556665161332512 0.8716144175690292  
0.3281745410715373 0.3599949895973845 0.3781893966918529  
0.5004187096743931 0.6443450778418410 0.8716809061226518  
0.3280580967888962 0.1401415130733807 0.3780338781349899  
0.5007202862713735 0.0647431923876898 0.0550402287190605  
0.6696754997839893 0.5706597686104400 0.5593494638436000  
0.5007442564514172 0.4352107953087011 0.0550414901098807  
0.3300101489015967 0.9293322781471662 0.5606994051295282  
0.5006664608071484 0.9275923651621883 0.937221289638702  
0.6723887498547213 0.4327596240906815 0.4415494006849904  
0.5006295018118110 0.5723964439528207 0.9372715139072332  
0.3279908676213404 0.0670083879139329 0.4420441645571918  
0.4429988862312634 0.0307767943157953 0.0231469956110785  
0.6127296175272905 0.5337587056159109 0.5301775732450619  
0.5584481783244699 0.4711562121625009 0.0278331549772210  
0.3870831898445380 0.9639754854845447 0.5267703558485074  
0.4429825492103938 0.9632877542655337 0.9651116414904310  
0.6140926901964056 0.4660880948376231 0.4724530965438253  
0.5583852422405866 0.5386750752554312 0.9697696683671432  
0.3860777471653831 0.0314611175332079 0.4685426479495099  
0.5584092489061682 0.9613258414502662 0.9697403961596038  
0.3861539807957133 0.468663400401201 0.4688474334295234  
0.4429634172451413 0.5366514946884394 0.9651496928345747  
0.6140717166879429 0.0337318570900067 0.4723974584079685  
0.5584438552225376 0.0288352114094274 0.0278267462000211  
0.3871196418853596 0.5361268110143275 0.5271323578234399  
0.4430075026369782 0.4691451113429971 0.0231519142210793  
0.6127043385348460 0.9660600055202865 0.5301171110833404  
0.8364225883969917 0.1419778391572477 0.1248552049790700  
0.9994074141118718 0.6426445446035957 0.6247569914066374  
0.8363600834572585 0.3579223926621343 0.1248215517402753  
0.9994375115123024 0.8574926126115142 0.6246441711209537  
0.8333011747144372 0.8576648934750568 0.8766078198571143  
0.6725917012817267 0.3596367863911572 0.3777070967366029  
0.8333962810362405 0.6422529960340911 0.8765339974502763  
0.6725662802212363 0.1401929402871047 0.3776313062967151  
0.8357079618777701 0.0691593781740133 0.0597402750947569  
0.9995159434255400 0.5695630857981513 0.5600458731282836  
0.8356979484958054 0.4307141863136157 0.0596651380718062  
0.6696494569558841 0.9291516017401910 0.5592559298795526  
0.8338736351842305 0.9308302873396057 0.9410409879815188  
0.9999104043513569 0.4311219731223505 0.4414652200870709  
0.8339684868489253 0.5690343524645597 0.9409012047569124  
0.6723673106014325 0.0670563449700247 0.4414646389996450  
0.7777191321269313 0.0356829249864581 0.0274262625193698  
0.9420966486808080 0.5330008571567023 0.5322294659898783  
0.8927813272486523 0.4677380883282675 0.0312704296713976  
0.7279406481066154 0.9623993826495340 0.5282536589396057  
0.7768016243189420 0.9679902335949468 0.9692820306950760  
0.9423039974097740 0.4652788966828266 0.4741506239776117  
0.8919064302642874 0.5354070432010128 0.9730974984706279  
0.7293154819757779 0.0300697561281826 0.4702642755910534  
0.8918384595574529 0.9643992504676452 0.9732004687701143  
0.7293384849307328 0.4697198067207867 0.4703939521343681  
0.7768737881948395 0.5319107332889129 0.9691299923195603  
0.9424978453494909 0.0347638808262306 0.4737418918345128

0.8927622216241153 0.0320745160442228 0.0313426679369975  
0.7279668875988614 0.5373866000477331 0.5283905318404325  
0.7777395432703104 0.4642300575768464 0.0273046870115378  
0.9422209677287627 0.9670426395488304 0.5318070136380506  
0.0001396974605458 0.2497626370699663 0.1061900398063844  
0.1666555054601417 0.7498933469709994 0.6075173580619663  
0.3343938856856690 0.7498440427636045 0.8957143245719416  
0.1629457588703790 0.2495701349364182 0.3970306326873871  
0.0617695333315519 0.0616072272973556 0.0484976358397265  
0.1022452245750576 0.9370258965278856 0.5478563682595292  
0.2255863348784230 0.4405351454188363 0.4566401456138366  
0.2678037093908361 0.5610012902938151 0.9523381516444684  
0.2676787461791104 0.9393085498043889 0.9524772424642751  
0.1025036047522882 0.4422650115137237 0.4442484390651895  
0.0625072093773022 0.5589175110171499 0.9436582676886071  
0.2254682829252016 0.0591518962828107 0.4556438276988176  
0.2670421912654591 0.0597008931208913 0.0566857200142622  
0.1021539333168725 0.5627920822423809 0.5482903962136233  
0.0619147516957926 0.4386337784330527 0.0483167206569759  
0.2272895623181777 0.9386112227249601 0.5603137841600987  
0.2273251673910750 0.5610373389749905 0.5614030816910988  
0.0623816532608272 0.9412690259105517 0.9439944649600920  
0.2671788667863092 0.4406841174272838 0.0567499149053543  
0.1027294616721882 0.0575360317867793 0.4437506707560279  
0.3237308128014659 0.2497368274566346 0.1031839391252329  
0.4996557997223168 0.7497773880265197 0.6010079783019574  
0.6654061517903956 0.7498774116278581 0.8940753494089090  
0.5001181299241204 0.2499737868645240 0.3985897364273108  
0.3980905660788524 0.0582892524618046 0.0444312482137984  
0.4324982773277453 0.9372344230668102 0.5470561606078422  
0.5696115828638636 0.4379484809088829 0.4502893872255446  
0.6033182248875253 0.5660880957526150 0.9482870702381218  
0.6033479675598613 0.9339204296317812 0.9482671171543308  
0.4307866885130192 0.4425782560996176 0.4426105237398841  
0.3980322363775883 0.5624824109374343 0.9399082757163211  
0.5695851485442309 0.0618660972505367 0.4502616993717426  
0.6033838961384431 0.0547733759867710 0.0528679288632457  
0.4325206838671673 0.5629482056008978 0.5472915426786024  
0.3981147739484380 0.4415792999301038 0.0443981108905569  
0.5671451070215551 0.9410162598392091 0.5537840680044152  
0.5671655940929565 0.5587999896264680 0.5538181240650775  
0.3980691187165633 0.9374161886862420 0.9398685888116903  
0.6033972292605121 0.4452284000372067 0.0528517752678606  
0.4306987456655649 0.0576593569936115 0.4424817889076257  
0.6762671861862971 0.2503824454446850 0.1024700698676930  
0.8327862474121216 0.7496135049686069 0.6067878635820121  
0.9993994505306678 0.7497722040583021 0.8949414106950656  
0.8369735719140523 0.2501267438424272 0.3962809336456873  
0.7329856061079086 0.0635753807683778 0.0489060014218657  
0.7724156564423637 0.9342986421357622 0.5505881716107145  
0.8972998913239345 0.4378628195494420 0.4530854658059311  
0.9366588361097119 0.5632560163126984 0.9517071221335643  
0.9365603065044977 0.9364949875315811 0.9517779178662823  
0.7748820204093154 0.4447428798920205 0.4464785821582932  
0.7314052419235072 0.5568121379790070 0.9446069117862523  
0.8975213767411703 0.0622328400112708 0.4526695793158962  
0.9382165752051933 0.0569543948898970 0.0559598336255222  
0.7724490384576501 0.5654601396129658 0.5507504477306578  
0.7329865308640666 0.4363832148283502 0.0487890146275149  
0.8970168655506635 0.9416716592648483 0.5567228794998573  
0.8969110178196926 0.5584022374679314 0.5571765606819870  
0.7313195956383389 0.9431104213634542 0.9447786696789985  
0.9382095525765900 0.4428145002298499 0.0559500926123644  
0.7748639995306777 0.0550247820122512 0.4463319684412137  
0.4140114209070583 0.2500447152686894 0.2466602384457923  
0.5866812961368139 0.2499308419865738 0.2470969558024125

Structure 1 S=4

1.0000000000000000  
20.9172000000000011 0.0000000000000000 0.0000000000000000  
0.0000000000000000 17.8076000000000008 0.0000000000000000  
0.0000000000000000 0.0000000000000000 12.2157999999999998

Al O C H Fe  
10 60 96 60 2

Direct

0.0820077370471793 0.2501810090121375 0.2509349275868353  
0.2490009719926909 0.7501424191544966 0.7532211570854677  
0.2459130777018524 0.2501618483569271 0.2528117998472029  
0.0826726326618515 0.7501076370680240 0.7508245228467865  
0.5836916564640532 0.7499606882427361 0.7459843050541385  
0.4160483682678583 0.7500522936326975 0.7470551904204735  
0.7538454272472903 0.2499306631149001 0.2525693720483432  
0.9165325520064419 0.7500527506307043 0.7508417793515462  
0.9180045758243187 0.2500069841075330 0.2510418939704833  
0.7504300192107750 0.7499592713925775 0.7519790456878964  
0.6706310077043712 0.2499196333371183 0.1853004502093800  
0.8335778372552120 0.7500030220418312 0.6864516386424859  
0.9995673477161030 0.7500693626248054 0.8159059861836471  
0.8359924449159009 0.2499190922444702 0.3169327902085913  
0.7813301294507931 0.1707512596035857 0.1507778979049857  
0.9451994021247383 0.6706872353095791 0.6503765281360590  
0.8898284022878582 0.3295261769890350 0.1502443469604185

0.7224804809525609 0.8284547229023673 0.6511109951374706  
0.7791070561992410 0.8295041027426643 0.8521472295519770  
0.9456976516504312 0.3295730181803968 0.3519123428889831  
0.8878907705357146 0.6706499653887644 0.8513950531830676  
0.7255889647120033 0.1700802154582617 0.3516927162432530  
0.8878172484487638 0.8293349696530027 0.8513582559830642  
0.7256376781824052 0.3297680056640451 0.3517803486533941  
0.7791753508815829 0.6704094606838960 0.8521171371039558  
0.9458518765999696 0.1704705774095024 0.3517916894497258  
0.8898947434612153 0.1704149799737026 0.1502376256165442  
0.7225031505379950 0.6714353347934163 0.6511120920623666  
0.7812646033625555 0.3291534966336660 0.1507171688904798  
0.9452164324218815 0.8294765637532648 0.6503794808975630  
0.3258713425117650 0.2501089861048149 0.1821114307865551  
0.4997889377124720 0.7499738772442238 0.6802778931544303  
0.6667272039857572 0.7499280462947112 0.8145104277484386  
0.5055819010825615 0.2499885013373205 0.3146234547449900  
0.4473686252814775 0.1673936758921812 0.1419060606014837  
0.6137222177895822 0.6711214178949579 0.6471672749569973  
0.5562739566202678 0.3337841847650724 0.1417181609508129  
0.3858539023845775 0.8288169993669161 0.6483992183011219  
0.4457490984627904 0.8281775330810721 0.8461175991002166  
0.6168237603326701 0.3325581573741182 0.3547987994337141  
0.5545526227340176 0.6719216232364813 0.8455601136204129  
0.3834161332322631 0.1674674057642486 0.3528455275518622  
0.5545975204861097 0.8280494917469625 0.8455346816323189  
0.3835305988528217 0.3327034850962603 0.3528346712746345  
0.4457008028628729 0.6718796780412210 0.8462535743733539  
0.6167747379580236 0.1672811866487661 0.3546882350583322  
0.5561758192788318 0.1661991497872932 0.1416858929539309  
0.3858318206830881 0.6712871943982448 0.6485421807870865  
0.4474653713351120 0.3325351226346838 0.1418488087890512  
0.6137041661526214 0.8287452289996091 0.6471391231696590  
-0.0000869676355257 0.2501256836448723 0.1858211941819216  
0.1658423081260908 0.7501020585240807 0.6870092896268452  
0.3329472377825594 0.7501333444263105 0.8159458630461727  
0.1639277361947209 0.2501907897219057 0.3172821755772974  
0.1095048168293193 0.1706666371544094 0.1498630245274052  
0.2770692585443266 0.6712577010395718 0.6528444655805730  
0.2180025790858039 0.3301217402419082 0.1520781741737220  
0.0539217659103728 0.8292705610482702 0.6501218932969802  
0.1111825376588903 0.8296200563024319 0.8511649977098361  
0.2748579077180043 0.3298108499714136 0.3530211091165072  
0.2199496040715119 0.6709156913193329 0.8532206580921194  
0.0543730220510780 0.1704224618506903 0.3517578841645412  
0.2199135273436577 0.8294407445136577 0.8531179545891218  
0.0542157321362585 0.3297924144521275 0.3517499631282472  
0.1112178459670495 0.6706251382277569 0.8511604754187492  
0.2747396115707283 0.1703302822569538 0.3529249321734306  
0.2179496123129533 0.1702401870274923 0.1519142726568990  
0.0539093374978369 0.6708367340013254 0.6501540285412384  
0.1095610111795133 0.3297283364621276 0.1500092222573270  
0.2770939115417299 0.8288563347964102 0.6527143403501611  
0.1638655945052050 0.1421439433025609 0.1255055628780215  
0.3310751605455107 0.6431569068153619 0.6257706076010690  
0.1639285887635857 0.3582157313285055 0.1256159083216319  
0.3311013522644830 0.8569107328348334 0.6255272044461324  
0.1654182224276653 0.8578786851795606 0.8768733341699535  
-0.0000498288795411 0.3581044458967042 0.3768633507758416  
0.1654676751147481 0.6424060074414628 0.8768757883893585  
0.0001249861407867 0.1419899851379215 0.3767189610041212  
0.1642436601440780 0.06933349479323200 0.0602862978527999  
0.3300623484835732 0.5704017094930891 0.5611450857645280  
0.1643340143000200 0.4309764950256884 0.0602821498636194  
0.9996825309596640 0.9305090510308711 0.5600159072590417  
0.1650415423273336 0.9311627073137728 0.9410703848483264  
0.3284010670590047 0.4326363874592186 0.4421960193097654  
0.1651215383155669 0.5690984235345203 0.9409806255343636  
0.0000472267646424 0.0687992958941760 0.4410244687454342  
0.1069332902885500 0.0346200374659323 0.0273763315264644  
0.2720785345211512 0.5346460425924167 0.5346756780500881  
0.2220788420307957 0.4666924717299383 0.0320432014370049  
0.0572802904238056 0.9645923150007154 0.5270701924671508  
0.1073163066801964 0.9670319131140663 0.9689661718618015  
0.2712175717639080 0.4670910457532411 0.4762203087784167  
0.2224559422897726 0.5342631900179431 0.9735793768969305  
0.0574733562444768 0.0322386741156121 0.4687829676425266  
0.2223705229819104 0.9660304378245833 0.9736288990066242  
0.0573189485406584 0.4676957855430347 0.4691799833243807  
0.1074012845006424 0.5331971491319115 0.9687944016987140  
0.2711329817470451 0.0327362272313781 0.4754914728262103  
0.2219859361515519 0.0336210423891972 0.0320426894336037  
0.0571793839278486 0.5353451894599359 0.5274508242026061  
0.1070233568537468 0.4656335373880448 0.0272533499939508  
0.2720369622281492 0.9651703551192737 0.5339188128411698  
0.5016040522289551 0.1383434429757367 0.1180110622951837  
0.6685253201394020 0.6432213995330973 0.6241447878362635  
0.5016921063706745 0.3616115132431060 0.1179991228845848  
0.6685053559974046 0.8566456901316232 0.6241035978082873  
0.5002460774439361 0.8558418252046636 0.8712286777352923  
0.3287462547683972 0.3595101994778033 0.3777688276294650  
0.5001916080054480 0.6441662769947487 0.8712948269871772

0.3286275926742213 0.1405994202904366 0.3776158935057939  
0.5009547773908106 0.0648882509627436 0.0553147954668981  
0.6697791949469166 0.5705423488044787 0.5594689645058420  
0.5010033633783594 0.4350685193466565 0.0553019542513780  
0.3300515578325576 0.9295820953532969 0.5606864160392844  
0.5004928432709326 0.9278092381087429 0.9368707478269392  
0.6721508091017868 0.4327185942976289 0.4412380744420000  
0.5004575319084118 0.5721764643897660 0.9369038423813376  
0.3283014007012231 0.0673750087066137 0.4417974827217589  
0.4431005144978477 0.0311187553639014 0.0234230970262589  
0.6127677499430894 0.5338121918992540 0.5302788920456623  
0.5585171982716062 0.4712243879401865 0.0276984890758121  
0.3871633149777015 0.9641480475125208 0.5267660799247237  
0.4429180535606208 0.9636635749078102 0.9651148834231823  
0.6139828033815360 0.4662460575685263 0.4723278606030317  
0.5582812778481020 0.5386232418201442 0.9693965443664094  
0.3862660682870146 0.0316365840855523 0.4684774006351656  
0.5582976749632106 0.9613914915040354 0.9693881794799395  
0.3863402613614004 0.4684843816078202 0.4687259802557905  
0.4429059618907688 0.5362695791926489 0.9651436248284379  
0.6139469652287280 0.0335930334280822 0.4722477018948524  
0.5584933181969168 0.0287819865464453 0.0277113153888647  
0.3871929354948231 0.5359587142364383 0.5270512788611986  
0.4431274828136200 0.4687995573043072 0.0234221754741155  
0.6127356553228414 0.9660307139034022 0.5302088449555964  
0.8355560882402376 0.1422518567321664 0.1252095111870468  
0.9995682349418071 0.6425405785013045 0.6251804114808733  
0.8354940692720750 0.3576617749403165 0.1251608414354767  
0.9995872266177750 0.8575607530821496 0.6250751597602909  
0.8335657411996957 0.8577380161146757 0.8766089570520040  
0.6718626574080597 0.3594273764945874 0.3774941843120103  
0.8336459011607731 0.6421977202243484 0.8765733515337801  
0.6718176490048453 0.1404118471177982 0.3773869462072830  
0.8352646719401733 0.0692858470094273 0.0601950668016360  
0.9996079180305985 0.5695162398564109 0.5603166348420364  
0.8352384418618125 0.4306079259742885 0.0600995482667076  
0.6697507197772428 0.9292995279043377 0.5593742274145286  
0.8339965685007512 0.9309660793845618 0.9410492549981679  
0.9998648701886628 0.4312209930062728 0.4413487588900913  
0.8340671854491418 0.5689317088357452 0.9409433506800575  
0.6721106659044380 0.0671150155491408 0.4411230053657650  
0.7774738311376650 0.0355112663490787 0.0276070268538577  
0.9421523808300811 0.5330693718183848 0.5323831836695171  
0.8924858462363482 0.4674195212301291 0.0317099301308167  
0.7279525248242061 0.9627103544273858 0.5281873396308184  
0.7768184449540692 0.9678845980368831 0.9692689645940219  
0.9422913529191502 0.4654231895306906 0.4741064451174621  
0.8918657843746229 0.5350546412511430 0.9733508508263560  
0.7291743186321890 0.0303431474473273 0.4699674468626027  
0.8918184949216083 0.9647898390274775 0.9734483421595660  
0.7292106511607603 0.4694796148020274 0.4701208949086638  
0.7768677972562887 0.5320444313147872 0.9691252885633552  
0.9424502698020624 0.0346349262535930 0.4737395041884188  
0.8924858366016227 0.0324235125248628 0.0318034472852280  
0.7279839217841635 0.5371141024696267 0.5283343046719672  
0.7774742689823815 0.4644209587771942 0.0274710054460536  
0.9422556585378947 0.9669935292330457 0.5320236577383277  
0.0001132160480671 0.2497285398882313 0.1064168708787003  
0.1664624224388449 0.7498989541838292 0.6075909298809254  
0.3342321269764504 0.7498489765636556 0.8953490317595511  
0.1633005898824768 0.2495116893164236 0.3966817823836983  
0.0616879573109324 0.0614456804561788 0.0485516205060148  
0.1023067851636600 0.9372066734629018 0.5480722062218678  
0.2257927617909015 0.4402500376577214 0.4562127466696946  
0.2677183850058260 0.5610192165318254 0.9523019688150247  
0.2676391028464257 0.9392936258660931 0.9523451219745849  
0.1024630647031156 0.4422573639256953 0.4441008107954461  
0.0624561723950022 0.5590671432454379 0.9436144128685048  
0.2256854737615115 0.0594485372572364 0.4552694856572622  
0.2669462677802744 0.0595786300535679 0.0569910903655171  
0.1022248380549184 0.5626757778308713 0.5484836202695986  
0.0617840632842284 0.4387823126387750 0.0483885545629533  
0.2273841426273012 0.9390538765417935 0.5600985624988266  
0.2274165964323697 0.5606311884929317 0.5610866028651949  
0.0623659459523538 0.9411284494127020 0.9438837213483228  
0.2670451381504239 0.4407718607976405 0.0570433933635510  
0.1026391833684159 0.0576056523269749 0.4436590393528974  
0.3239126085381447 0.2497112815901037 0.1026353379222936  
0.4996138622466902 0.7497878414203897 0.6008499593846881  
0.6654426346847425 0.7498913267374651 0.8938999251985846  
0.5092496499685546 0.2499183926627531 0.3942129386788321  
0.3981754394430604 0.0585757382255251 0.0448385103058967  
0.4325317090839972 0.9373133767286145 0.5470913759260558  
0.5694673773094776 0.4382422180374193 0.4500923092544796  
0.6031716207580773 0.5660767230338489 0.9478101895249795  
0.6032018206531254 0.9339691676372054 0.9477973130641778  
0.4310204819093292 0.4425141089761633 0.4424979991656465  
0.3978960171604425 0.5620011013171734 0.9400141427818934  
0.5694303636586713 0.0616015686256419 0.4500341666352909  
0.6034467765552668 0.0546304796651646 0.0528049683184986  
0.4325377597952406 0.5628970552490857 0.5472401386727449  
0.3982171297832194 0.4413033742600977 0.0448253217065928

0.5672241233221067 0.9409752153970777 0.5541194617249102  
0.5672528209810874 0.5588711723354839 0.5541605052360031  
0.3979253210454405 0.9379005016567041 0.9399670982417454  
0.6034861305027107 0.4454099827160715 0.0527833915685690  
0.4309321017243981 0.0577220499153194 0.4424232865149300  
0.6682539655299096 0.2504148136445232 0.1057997523249386  
0.8331132055081777 0.7496072736183051 0.6070286910235022  
0.9995330226449404 0.7497618855719295 0.8953340403158349  
0.8366715874136660 0.2501638129094946 0.3963419054822932  
0.7326363191604758 0.0631752353431594 0.0489962124151821  
0.7725007525014892 0.9347770778308696 0.5505964503001181  
0.8972548783210793 0.4380822219418228 0.4530311277733823  
0.9367164465352386 0.5626949995873479 0.9519142099827650  
0.9366456957125009 0.9371036167562076 0.9519950512260497  
0.7747398359889131 0.4444403526801985 0.4461973272221745  
0.7315054419229492 0.5570811359694784 0.9443459071827471  
0.8974412090605085 0.0620272099914639 0.4526392120402710  
0.9379176130192518 0.0573615733259310 0.0564653949277579  
0.7725322066080860 0.5650326877046217 0.5507754120129372  
0.7326160676200905 0.4367973277185940 0.0488434493152673  
0.8970762314388800 0.9416190895913316 0.5570521361437208  
0.8969950588003891 0.5584887076889461 0.5574337906379676  
0.7314356752480937 0.9428807648742903 0.9445242690525355  
0.9378993284628587 0.4424399558302438 0.0563864311095067  
0.7747026754943130 0.0553726428409334 0.4460174073212040  
0.4146206602044539 0.2500304631066865 0.2443833059811993  
0.5866633411913309 0.2499511146823258 0.2480292041556112

Structure 1 S=3

1.0000000000000000  
20.9172000000000011 0.0000000000000000 0.0000000000000000  
0.0000000000000000 17.8076000000000008 0.0000000000000000  
0.0000000000000000 0.0000000000000000 12.2157999999999998

Al O C H Fe

10 60 96 60 2

Direct

0.0824892623329012 0.2501678199678198 0.2512751751520124  
0.2490482189497949 0.7501329389048358 0.7524880885765631  
0.2469030315019004 0.2501421376008189 0.2505120499767932  
0.0826900547569239 0.7501034685521479 0.7509371801566298  
0.5836819337902754 0.7499615506269730 0.7467329468475705  
0.4160992985880484 0.7500532956556397 0.7470003207106827  
0.7543678838866879 0.2499194003594186 0.2517925342291768  
0.9165660012245522 0.7500479005251827 0.7509215556286780  
0.9183464683452685 0.2500101400340586 0.2506947567267402  
0.7504447757032179 0.7499602484426494 0.7519944990653891  
0.6741828148170651 0.2499137008679660 0.1818069287209541  
0.8336333149538226 0.7499981653910377 0.6864070165663646  
0.9996520921647932 0.7500695095092799 0.8160325741089730  
0.8363822211153640 0.2499305914874905 0.3165117497375444  
0.7824934306258727 0.1702736456360882 0.1508922022677021  
0.9452895325864011 0.6706802798759959 0.6504866509674554  
0.8908832118093815 0.3298115706063824 0.1498101514990683  
0.7224308688766425 0.8284076591047730 0.6512713947378215  
0.7791710177575064 0.8294351542678274 0.8520898359105334  
0.9460019788909024 0.3295124849386165 0.3518878132262311  
0.8879554932067242 0.6707990616293827 0.8513219326036332  
0.7259605532743906 0.1698324331934540 0.3518691987822120  
0.8878901181128190 0.8291904294316462 0.8512789081354277  
0.7259775339709498 0.3299897337616974 0.3519664018654126  
0.7792310993424156 0.6704914890765850 0.8520764277607616  
0.9461467460540538 0.1705352569632504 0.3517783157880510  
0.8909575102982396 0.1701365461875972 0.1498016714410643  
0.7224544465442644 0.6714801280939920 0.6512713145015997  
0.7824187439526508 0.3296366254731522 0.1508341372814259  
0.9453035654884234 0.8294718900626858 0.6504893721951333  
0.3292846613561350 0.2501055141475282 0.1826467089370710  
0.4997759231974607 0.7499751568707631 0.6808236093620932  
0.6666523549667617 0.7499285249707679 0.8148911233640115  
0.4953709804568071 0.2499547209923937 0.3162042431311436  
0.4424938283310429 0.1666629791895074 0.1436832277276973  
0.6136720747718232 0.6711354462621048 0.6475840048952825  
0.5518274383180440 0.3322403386507282 0.1450717995142715  
0.3858743877187002 0.8291870806786865 0.6479504151455076  
0.4456925655843536 0.8285419732297761 0.8462780774288440  
0.6173386600586473 0.3321639696184819 0.3541419329068065  
0.5544609419859624 0.6712853096134561 0.8463539768215791  
0.3854633506327165 0.1675496717727727 0.3527245660201971  
0.5545056889445166 0.8286867642150190 0.8463338117929721  
0.3855808719763272 0.3325697268509372 0.3528367684142541  
0.4456443430669420 0.6715263609718535 0.8464194932669676  
0.6173274280015568 0.1676686137925036 0.3540210717882977  
0.5517453942550106 0.1677370092689631 0.1450628374043949  
0.3858563217457605 0.6709137770067277 0.6480815334863200  
0.4425744232839847 0.3333241273158823 0.1437594354567554  
0.6136534160983069 0.8287330301451761 0.6475578183600045  
0.0005217111682502 0.2501108290517752 0.1859220437079786  
0.1659195221007604 0.7500913819393545 0.6868244256516056  
0.3329511745539446 0.7501306178195568 0.8152206266130816  
0.1649152687540300 0.2501709675542963 0.3165231441212216  
0.1104567496309791 0.1707801248889283 0.1501949376245793  
0.2771111514930826 0.6706812385759263 0.6520271704890834



0.2190496041501245 0.3296955050834693 0.1507159361326613  
0.0540050063167790 0.8292777678207760 0.6502600661292246  
0.1112652642036112 0.8296397966017141 0.8512709747876458  
0.2763817555053212 0.3291228927187765 0.3504643607609289  
0.2200264776894395 0.6708611584625596 0.8529075643511077  
0.0546906306927082 0.1703825595189090 0.3518631086801581  
0.2199964165399033 0.8294816534489596 0.8527861093784722  
0.0545421254421408 0.3298062761807471 0.3518697545876010  
0.1112946540353671 0.6706056039606826 0.8512943649397001  
0.2762620128864974 0.1710005685341737 0.3503609898078849  
0.2190075834331055 0.1706452384155819 0.1505422820551167  
0.0539961924277703 0.6708155590652343 0.6503057649227485  
0.1105021245258972 0.3296005144349834 0.1503597138072389  
0.2771313135698068 0.8294214793637967 0.6518908506261932  
0.1646951638207408 0.1423726368534352 0.1251636175370073  
0.3311872802188049 0.6425691116701288 0.6251703195330340  
0.1647474061159927 0.3579684184827029 0.1252864542238337  
0.3312089976583116 0.8574962875740418 0.6249423346076477  
0.1655201114104401 0.8578934852111789 0.8768218954837897  
0.0001857954828555 0.3580824245921725 0.3768794881249254  
0.1655615838261746 0.6423861742433383 0.8768553606068376  
0.0003472722924541 0.1420045262226778 0.3767404524714477  
0.1647569677872715 0.0694380401717270 0.0603009527502882  
0.3304645614562239 0.5695326615701216 0.5605603879575723  
0.1648327417617256 0.4308551226462697 0.0603089187450410  
0.9997443251774054 0.9305201588132475 0.5601447869944165  
0.1652012806934093 0.9311812271483578 0.9411645632671555  
0.3298056114919348 0.4315103439875144 0.4413310014089789  
0.1652689342306820 0.5690753537717822 0.9411128126789314  
0.0001378994737270 0.0687910913647932 0.4410414462437104  
0.1073290152042755 0.0348187800462711 0.0276356681556649  
0.2727770906983487 0.5332269160384008 0.5335780725726770  
0.2224580464545673 0.4667657318324915 0.03202065524297875  
0.0573402664633162 0.9645924236538876 0.5271893253934188  
0.1075521723928151 0.9672017472720281 0.9692384994528384  
0.2723908493786517 0.4655992248039355 0.4750918490145765  
0.2226673354930569 0.5343597554139683 0.9736288603408056  
0.0575341498902783 0.0322124072478705 0.4688543085935734  
0.2225945731758565 0.9659259109664006 0.9736433972471009  
0.0573949894988137 0.4677288854411383 0.4692227661829302  
0.1076242892405701 0.5330200480112223 0.9690998164247016  
0.2723112803475530 0.0342398405629681 0.4744095123482003  
0.2223803120257205 0.0335324480661069 0.0320010684859929  
0.0572501734575989 0.5353517779224903 0.5275439410061612  
0.1074046309083825 0.4654212765156603 0.0275321386731871  
0.2727395859276693 0.9666057098849554 0.5328788476879124  
0.4977275466721422 0.1393628247539784 0.1202441624476193  
0.6684670584497795 0.6432480068755242 0.6243624687932871  
0.4978035441139688 0.3606103608554989 0.1202661985146706  
0.6684467936458197 0.8566199049543390 0.6243270903216416  
0.5000788821745027 0.8565131598813597 0.8716555141872423  
0.3300350682418818 0.3584974500538620 0.3763014555437940  
0.5000235057855201 0.6434997621298310 0.8717197118081129  
0.3299189893879567 0.1415905995233631 0.3761115564998598  
0.4982576496490643 0.0661557343364905 0.0563274894393825  
0.6697586984966427 0.5705838755962089 0.5596135742138806  
0.4982962750615688 0.4338078618693022 0.0563175580298546  
0.3304558734168898 0.930458945398732 0.5601428624353194  
0.4997942070643144 0.9288015637593776 0.9372040150386326  
0.6722043191191980 0.4326516118464512 0.4414732232467219  
0.4997551997223612 0.5711882509294630 0.9372291391088423  
0.3297110711426431 0.0685012702778414 0.4409537036323404  
0.4410734006148344 0.0313985423128980 0.0235409468251522  
0.6127773164600488 0.5337944595131077 0.5303654213455293  
0.5563647753780210 0.4691399422380254 0.0290631783305099  
0.3877672302986775 0.9647838986255854 0.5264311010411167  
0.4418372024753358 0.9640461267447439 0.9650029179018574  
0.6140208488524936 0.4661870288761568 0.4724558990879933  
0.5570330551550674 0.5366146226763542 0.9705407194775109  
0.3873962734940526 0.0322626015890447 0.4680126028361649  
0.5570538905525824 0.9634016007180906 0.9705395264818695  
0.3874646859621241 0.4678595807463747 0.4682313357223283  
0.4418196039360661 0.5358922483441352 0.9650200684942749  
0.6139958959899240 0.0336540596544892 0.4723756468396469  
0.5563476289335215 0.0308680734984058 0.0290802983074763  
0.3877934425614048 0.5353272590666600 0.5266756591363466  
0.4410937336747885 0.4685269832356340 0.0235337643204855  
0.6127512400301754 0.9660529696226388 0.5302999110354987  
0.8365430187407265 0.1418605936826202 0.1250952214723384  
0.9996426906886305 0.6425227562935580 0.6253110038339075  
0.8364719040800602 0.3580578848936088 0.1250471001717920  
0.9996577680150857 0.8575699293327114 0.6252083316366145  
0.8336481975884357 0.8576267936102016 0.8765236758452514  
0.6721110581403499 0.3593890455101884 0.3776770473213028  
0.8337192975427984 0.6423182384118008 0.8765003436475044  
0.6720952580112562 0.1404331631801995 0.3775693894814622  
0.8358747773452510 0.0689459729530581 0.0601107604908880  
0.9996781078131818 0.5695049140200126 0.5604239728072162  
0.8358391693404740 0.4309530452236408 0.0600121520150044  
0.6697336566139419 0.9292597309510855 0.5595301738079792  
0.8342011352710695 0.9307960004712296 0.9409165934499436  
0.9999725909197945 0.4312289024788560 0.4413453401891659

0.8342607430833809 0.5691121066845428 0.9408212357050740  
0.6721806897288393 0.0671738607688914 0.4413640060380590  
0.7779255495118799 0.0353988420970063 0.0277109760397802  
0.9422297531379076 0.5330582814117911 0.5324232730864028  
0.8929491108668237 0.4678452345602607 0.0314407279535335  
0.7279528042586264 0.9626556655649919 0.5283682001369233  
0.7770933187519592 0.9678143878096199 0.9692868107182645  
0.9423736282016270 0.4654250483619054 0.4740797409444068  
0.8921646414204758 0.5354268694270221 0.9730447379172246  
0.7291926639336209 0.0303052394812836 0.4702156439344646  
0.8921277781760442 0.9644263437390477 0.9731383539369054  
0.7292159127236190 0.4695091116098115 0.4703560303520183  
0.7771315582249572 0.5321232711145081 0.9691482536237327  
0.9425170441421925 0.0346317337417110 0.4737402690316951  
0.8929585532990465 0.0320032821761010 0.0315384928946965  
0.7279767045373191 0.5371639187841309 0.5284976911098931  
0.7779162808666303 0.4645385386969777 0.0275718967996312  
0.9423227490958231 0.9670041888645199 0.5320946268640213  
0.0004493497752227 0.2497142665342310 0.1065171820286060  
0.1663385588694222 0.7499002456384385 0.6074009576976508  
0.3340970132115758 0.7498512678141825 0.8946349592019526  
0.1645480845486908 0.2494880074251742 0.3959325555881845  
0.0621147403578530 0.0617051179194196 0.0488912695399082  
0.1023655744924634 0.9372233245547787 0.5482269563481091  
0.2271573504963907 0.4384524099658402 0.4546912788568118  
0.2678741941390446 0.5611988646322630 0.9522845533421819  
0.2678065563923667 0.9391057445813062 0.9522844130573451  
0.1025290419521561 0.4422965285023070 0.4440938517768689  
0.0625883515379932 0.5587436349440800 0.9440485128256096  
0.2270545331422744 0.0612610606816078 0.4538059549357312  
0.2673784485277325 0.0594122482116763 0.0568803725672467  
0.1022929768131980 0.5626708981910503 0.5486079931082877  
0.0621949339288793 0.4385090539236424 0.0487403020895021  
0.2277670602303848 0.9409884621870681 0.5585286207943249  
0.2277946761125644 0.5587185992987191 0.5594429633453289  
0.0625119343377818 0.9414460732055620 0.9442776072393197  
0.2674598874616284 0.4409148052438213 0.0569439318374718  
0.1026884853918501 0.0575804804145899 0.4436869551202247  
0.3317663998276358 0.2497433235538137 0.1031895395569345  
0.4997716639707395 0.7497955374904810 0.6013861788850309  
0.6655147753294217 0.7498978842259159 0.8942908100454593  
0.4908513471632316 0.2500820067122537 0.3956982177812101  
0.3958306216218924 0.0581434282247563 0.0447352834708088  
0.4330270726953455 0.9377490709527316 0.5468704425695313  
0.5694981119400296 0.4381991260563506 0.4501434484881227  
0.6023868534467628 0.5633323216620327 0.9496579705775183  
0.6024211783561456 0.9367164119469672 0.9496501551575938  
0.4323988196344174 0.4424523886706063 0.4421346137447614  
0.3970727888456749 0.5620381590472371 0.9395522075891783  
0.5694738924336802 0.0616496167940350 0.4500781805363775  
0.6011122909780814 0.0570260706566771 0.0546097332894391  
0.4330302880292387 0.5624641975423005 0.5469738616713971  
0.3958647455737340 0.4417443748985982 0.0447186854934306  
0.5672495633550106 0.9409490537699040 0.5541549097398139  
0.5672736819507797 0.5589044955640814 0.5541950523579314  
0.3971069723558586 0.9378696735305413 0.9395174112183216  
0.6011454561628834 0.4430162909794835 0.0545843174972397  
0.4323161149666186 0.0577829173993344 0.4420836402564815  
0.6759963640859394 0.2504397506922481 0.1023294491064735  
0.8332199867668432 0.7496026027723068 0.6069880657226258  
0.9995811038127510 0.7497577309767312 0.8954619318910959  
0.8367587417181380 0.2501803363490031 0.3959171343591978  
0.7331413458128787 0.0631422014783206 0.0492698916087784  
0.7725079905690967 0.9347203024744485 0.5507170223584994  
0.8973152829173747 0.4381402559311770 0.4529693592214343  
0.9369434371947055 0.5631451176362079 0.9514492004044198  
0.9368839095495634 0.9366653210188342 0.9515267729324547  
0.7747249323655100 0.4444521896944220 0.4463774387515403  
0.7317242882763798 0.5570814199150925 0.9443914265532759  
0.8974833311859131 0.0619632841355680 0.4526078939829724  
0.9383594163798294 0.0569829656466379 0.0562302020572614  
0.7725349711392533 0.5650817209857782 0.5508733497109238  
0.7331144753416777 0.4368345505369661 0.0491099287176334  
0.8971414891149710 0.9416354917256413 0.5571468868051310  
0.8970691610719448 0.5584725399884695 0.5574884605900507  
0.7316663283638373 0.9428891281208617 0.9445614445006557  
0.9383322992062627 0.4428222737803717 0.0561381919920642  
0.7747008626689231 0.0553519740496972 0.4462098013622233  
0.4142109589318231 0.2500428190276972 0.2476832132670203  
0.5857252301438591 0.2499374698736923 0.2471790229644429

Structure 1 S=0  
1.000000000000000  
20.9172000000000011 0.0000000000000000 0.0000000000000000  
0.0000000000000000 17.8076000000000008 0.0000000000000000  
0.0000000000000000 0.0000000000000000 12.2157999999999998  
Al O C H Fe  
10 60 96 60 2  
Direct  
0.0823142015813129 0.2501303250002399 0.2510657188709996  
0.2490783343513029 0.7500966387015743 0.7526905024464944  
0.2464664100318902 0.2501213866963181 0.2518696979560309

0.0828226056131939 0.7500873042051995 0.7509528282140023  
0.5837321033062527 0.7499845019645125 0.7465135810487022  
0.4160599981719708 0.7500343050387296 0.7470488401572668  
0.7538669418203060 0.2499425534462368 0.2512750398885331  
0.9167366005419981 0.7500478825787833 0.7509869883644013  
0.9179453109439961 0.2500179650800368 0.2509107467396490  
0.7505746474009169 0.7499855627090659 0.7518187120942396  
0.6736718572055332 0.2499062089311123 0.1824512361060076  
0.8337826119310202 0.7500087194790457 0.6863017279041659  
0.9997807864503753 0.7500718469174976 0.8161168772707041  
0.8356420293616076 0.2499590989253771 0.3163541409223269  
0.781753550852000 0.1703542968476512 0.1504470552866921  
0.9454228403556852 0.6706006687901209 0.6506386871165178  
0.8901392031978328 0.3298183238350904 0.1500374518294235  
0.7223799416160639 0.8284722866292842 0.6510563406376135  
0.7792801603020598 0.8294612160203795 0.8517840787229838  
0.9457526117297401 0.3295216546271719 0.3518929194768833  
0.8880426993636031 0.6708077031913203 0.8514578457302526  
0.7253003082523801 0.1695120012833557 0.3517191239553303  
0.8879953025252884 0.8292042426362475 0.8514100090405344  
0.7252757343311199 0.3303241541102097 0.3518755100959116  
0.7793212145829118 0.6705152664122118 0.8517948488088837  
0.9458580622724763 0.1705388485841889 0.3518518302953040  
0.8902283068541043 0.1701425975732639 0.1500569897236657  
0.7224075941358059 0.6714502906829977 0.6510693013020724  
0.7816616855771045 0.3296277666069872 0.1504538815877363  
0.9454303874105265 0.8295176700869036 0.6506425403421341  
0.3266112843586383 0.2501181506401416 0.1827786216129789  
0.4998556352231587 0.7499818817860459 0.6805807774278204  
0.6668832779332651 0.7499699354626480 0.8148254824497243  
0.5001761877345793 0.2499604591649288 0.3193754652163828  
0.4459783735386907 0.1670059322161747 0.1411555415167944  
0.6136165819029555 0.6712156078555140 0.6478844885492490  
0.5545665683872945 0.3331544403623040 0.1414390477470935  
0.3860904548875355 0.8286968762895254 0.6484733106939261  
0.4455968913472935 0.8280739769304731 0.8461053245753942  
0.6166674338546981 0.3324079917800919 0.3539871806639923  
0.5544359805573732 0.6720027253703873 0.8459363397429425  
0.3837295337445624 0.1672857320807105 0.3537845903076482  
0.5544565294303421 0.8280036529952192 0.8459014147348146  
0.3837955846694329 0.3326768861317441 0.3540942815792437  
0.4455731738681121 0.6719769804080534 0.8462069461132934  
0.6167003356237623 0.16761008388830371 0.3541833132475332  
0.5545532263340655 0.1666516435459958 0.1417251357420019  
0.3860754446332029 0.6713566707554099 0.6485622579402511  
0.4459892296437571 0.3331606955190718 0.1414168941650936  
0.6135929167773141 0.8286983677131045 0.6478340058834873  
0.0001278226201597 0.2501008623437773 0.1859788527942215  
0.1659156618924700 0.7500660548483770 0.6867238206571068  
0.3328857360405844 0.7500869489149496 0.8156650222131242  
0.1646096650925236 0.2501244472846643 0.3167583826800731  
0.1101032060393289 0.1705233045890566 0.1500476901662987  
0.2772966467890279 0.6712823255072630 0.6522925144169511  
0.2185931361125435 0.3299475054142030 0.1512185292008487  
0.0541228179431884 0.8293479871087335 0.6503671457559941  
0.1114258958861417 0.8295102912615904 0.8512958159701096  
0.2751859121669459 0.3302904760357588 0.3525415427994205  
0.2201562238522047 0.6708563480902601 0.8527140677106887  
0.0544280220280855 0.1704368524024074 0.3517685788977661  
0.2201483393997280 0.8294290522038150 0.8525753281364608  
0.0543183570259898 0.3296890835874464 0.3518010768831572  
0.1114334171456575 0.6707067839493605 0.8513686496091160  
0.2751156656646892 0.1698023050467986 0.3524953161733265  
0.2185835819768787 0.1703088347514377 0.1510759193562697  
0.0541201667207158 0.6707189618967317 0.6504238598355079  
0.1101187979490488 0.3298030539824547 0.1502377978239257  
0.2773142672615442 0.8287650846428624 0.6521723611134186  
0.1644341863577409 0.1420757360445925 0.1253003741846259  
0.3313704030280647 0.6432023454235501 0.6255886678017666  
0.1644562871169480 0.3582035458431269 0.1254347181331907  
0.3313894717228266 0.8568234673330292 0.6254188451930577  
0.1656848086634597 0.8577872630791590 0.8767545401174646  
0.0000114580742536 0.3580075319183874 0.3768355525387510  
0.1657010052634476 0.6424564340075549 0.8768423893480451  
0.0001255885306362 0.1420624867791901 0.3767374189585190  
0.1647770125068904 0.0691552210418220 0.0603159663987824  
0.3305586789548094 0.5704423353571929 0.5611207999265861  
0.1648232586360684 0.4310918533358744 0.0603782718059970  
0.9998371080382662 0.9306342921025746 0.5603637271017010  
0.1654087706256251 0.9309817873665746 0.9411212358134067  
0.3290818679621512 0.4328744418927613 0.4421818164846437  
0.1654450445155231 0.5692506969512663 0.9411636754320540  
0.0000491232770259 0.0688683126849316 0.4411207816951189  
0.1074300032156160 0.0344583452628646 0.0275924851691015  
0.2726248282972223 0.5346445546973217 0.5346234152535778  
0.2225350191823264 0.4669103106871849 0.0321497033126194  
0.0573934455698766 0.9648023807054342 0.5273829777482495  
0.1077253856878259 0.9668730674405419 0.9691819622980378  
0.2718911073897674 0.4671796301026902 0.4760842064290882  
0.2228236097557180 0.5345038338498103 0.9737343540942496  
0.0575011279341465 0.0324009967691350 0.4689727232416476  
0.2227835186739905 0.9657561270210460 0.9736486429400426

0.0574078467656373 0.4675547966663297 0.4692510577305653  
0.1077667362706098 0.5333225202797758 0.9691426266583472  
0.2718583881945668 0.0326583066020054 0.4755111131314541  
0.2224880169968691 0.0333521833339670 0.0320538227580444  
0.0573359038029705 0.5351548920914176 0.5276537323605528  
0.1074763195726595 0.4657460470042450 0.0275668157050508  
0.2726080297938842 0.9651959966317911 0.5340556172676312  
0.5002432141714038 0.1382743339120944 0.1173850679780063  
0.6683440053615639 0.6432699771159601 0.6245264445179344  
0.5002813055727021 0.3617092002771018 0.1173700525583944  
0.6683222004890761 0.8566368205541089 0.6244693602612827  
0.5000587566035908 0.8558081760802611 0.8711735721915783  
0.3289918663607942 0.3597895245713685 0.3779622765782528  
0.5000338477826408 0.6442147981807245 0.8712277974567713  
0.3289247324895618 0.1402208606634594 0.3777359110433972  
0.5002159580599310 0.0649731004169650 0.0545604391250250  
0.6693005462847296 0.5705883260263109 0.5599037383585853  
0.5002582727870968 0.4350106492165917 0.0545417231978823  
0.3305590053935387 0.9295278171038229 0.5608161432086124  
0.5001318916219206 0.9279252255150425 0.9363431784737147  
0.6712193371249113 0.4328853530294342 0.4414093996159471  
0.5001226447645698 0.5720793277971473 0.9363629417284318  
0.3290400918901299 0.0670922046721880 0.4418579659199771  
0.4424723672885706 0.0310245760424459 0.0226074649083491  
0.6121473242685956 0.5341112109551304 0.5307334993012661  
0.5579466654389523 0.4708664096894863 0.0269873119069854  
0.3877843640125628 0.9639548585701933 0.5270916621428661  
0.4424529204661706 0.9635963791560496 0.9643496893546825  
0.6130887347681058 0.4665655026152198 0.4726053737946207  
0.5578566875977322 0.5382978547246112 0.9687192077176447  
0.3870502774269772 0.0314174313863587 0.4687286812002077  
0.5578545110767045 0.9617232835582956 0.9687132937556806  
0.3870747000541900 0.4686490896711165 0.4688607637381796  
0.4424579217427571 0.5363719196711328 0.9643515096463704  
0.6131010536129936 0.0333363075402077 0.4725158553063988  
0.5579186760047924 0.0291400945654242 0.0270145449452977  
0.3877904826599425 0.5361150884883470 0.5272126764480340  
0.4425019449144031 0.4689415606690507 0.0226027014858852  
0.6121400566157451 0.9657865727652394 0.5306313636644104  
0.8358641244966986 0.1418885416618644 0.1250245092734544  
0.999770787464444 0.6424141525506121 0.6254581565531037  
0.8357824117952430 0.3580701839637007 0.1249940724018623  
0.9997837750719056 0.8576570647756738 0.6253730948802370  
0.8337309280379457 0.8576322749291974 0.8764727254349238  
0.6714557999770416 0.3597084524809382 0.3774775133228904  
0.8337787163208330 0.6423497212007423 0.8764642257833423  
0.6714807394007591 0.1401966271425930 0.3774650520520768  
0.8353026061412046 0.0689353878925495 0.0601242484365824  
0.9997965894693701 0.5693861963623065 0.5605739850025925  
0.8352575666386548 0.4310016857354737 0.0600380743217621  
0.6692859636585301 0.9292922999409658 0.5597934590853341  
0.8341137541498670 0.9307693693749959 0.9409449067555953  
0.9999364387536299 0.4311495454951295 0.4413420876773112  
0.8341473239886557 0.5691762164938049 0.9408633440686682  
0.6712395721075509 0.06699335084672949 0.4413191447161358  
0.7774582091160409 0.0351392022701624 0.0276670705014750  
0.9423180900560043 0.5330276065781622 0.5325250611164379  
0.8924775822348263 0.4676936410983650 0.0315981938087775  
0.7273715743931622 0.9628872778642742 0.5285614461525592  
0.7768800339577265 0.9675416127629272 0.9692593713219827  
0.9423894784016612 0.4654290099775010 0.4741090731837647  
0.8919363585791646 0.5352778731178078 0.9732046914268088  
0.7283442437221307 0.0304239542193149 0.4702250472697713  
0.8919219966477678 0.9646184570186350 0.9732920765963989  
0.7283299320468529 0.4694170282931530 0.4703704547424508  
0.7768958574949895 0.5324263124243728 0.9691369126560798  
0.9424858107461054 0.0346192137926722 0.4738714198258383  
0.8925001522439822 0.0321976998250609 0.0316917956985101  
0.7273767644634648 0.5369537299762680 0.5287092270221184  
0.7774363791875853 0.4648283383934409 0.0275426605092459  
0.9423773377004323 0.9670228540494049 0.5322918385123775  
0.0001706076840117 0.2496594229875027 0.1065753215080564  
0.1662998761132968 0.7498923004878925 0.6072999771548263  
0.3339238773983733 0.7498462453330680 0.8950733833069193  
0.1647077288163742 0.2494097330729065 0.3961558725695278  
0.0622276086162606 0.0613297620835087 0.0489004414845267  
0.1024644922801555 0.9375350458489764 0.5484320089536845  
0.2266402521441958 0.4400854876425648 0.4557637813614222  
0.2680458200771665 0.5613478802240222 0.9524286100142466  
0.2680093058060596 0.9389324609147569 0.9523139392322251  
0.1025263214386578 0.4420901935162407 0.4440873618563771  
0.0627869548615551 0.5591612284425566 0.9440879305636938  
0.2265977482053038 0.0596580208403917 0.4549930259158151  
0.2674955180356778 0.0592266572998771 0.0569396633220866  
0.1024213151337358 0.5623818528578740 0.5487232063388933  
0.0622797714054976 0.4388436930984002 0.0488243704598277  
0.2279120300297537 0.9392631456419203 0.5603071902856975  
0.2279296643527784 0.5604883956995421 0.5610642986301212  
0.0627450431523688 0.9410008186240435 0.9442004928516987  
0.2675468069943489 0.4410623644546559 0.0570741984943581  
0.1026349020799717 0.0578154216373754 0.4437796364239971  
0.3252653749993821 0.2497617464562219 0.1032612583730514

0.4997571475761076 0.7498187174675061 0.6011567328200872  
0.6658948674317392 0.7499168094969429 0.8942317233944184  
0.5002134850224976 0.2500574439390920 0.3991603592416271  
0.3975282973163488 0.0583670774158627 0.0441266755806011  
0.4330602089694112 0.9369714446165154 0.5476664442457501  
0.5683476148564368 0.4389712460908737 0.4504581398581119  
0.6027340597754910 0.5657198165235116 0.9469750679724612  
0.6027412233678482 0.9343276384187468 0.9469523334981312  
0.4318795568854699 0.4428235480514053 0.4428781255683289  
0.3975525993310945 0.5622467870111688 0.9390495788395643  
0.5683726261130226 0.0609613710932776 0.4503782021054352  
0.6028908779491170 0.0549456149994863 0.0521206360821276  
0.4330554362325705 0.5631858721305210 0.5476095554190699  
0.3975671819443151 0.4415793891620064 0.0441253376351399  
0.5667740688094283 0.9404290012905681 0.5547171956703681  
0.5667879651591307 0.5594842551230915 0.5548215131805989  
0.3975584263479183 0.93769269855273135 0.9390558135223996  
0.6029286940538916 0.4450739955279754 0.0520717732746193  
0.4318573562335690 0.0573203290002640 0.4429190931892593  
0.6749140727176298 0.2504299534183680 0.1029328813111638  
0.8335438242683996 0.7495941407043687 0.6068788087112779  
0.999772013266603 0.7497416527865621 0.8955479560344228  
0.8354846084950986 0.2502050146809611 0.3957557605859128  
0.7325545251577447 0.0626579142723391 0.0491143162432408  
0.7720065963164915 0.9351941339642843 0.5510086843121195  
0.8973088392745566 0.4382248578295483 0.4529294615823397  
0.9368178011689104 0.5628018374385072 0.9517141244683689  
0.9367856675897844 0.9370600029345514 0.9517897846765039  
0.7736680773268297 0.4440737482953264 0.4461801205526705  
0.7315874766424914 0.5576126242439976 0.9443346663423928  
0.8974227400428990 0.0618617233305344 0.4526890027184295  
0.9377928776708820 0.0573874917650143 0.0565081626199414  
0.7720236865761096 0.5646107916272683 0.5511802727952513  
0.7325179892427157 0.4373360260280091 0.0489688395432277  
0.8972300403439377 0.9415889404707205 0.5573691544269269  
0.8971843795521419 0.5584944184588405 0.5576032975719920  
0.7315573336010240 0.9423790450315179 0.9444789512604324  
0.9377565926912922 0.4424648345338744 0.0564082018779079  
0.7736911697192466 0.0557356884461856 0.4460121633741380  
0.4150476465609866 0.2500462008435377 0.2474914196205016  
0.5853492000217456 0.2499348678643301 0.2475453664775606

Structure 1 monomeric Fe S=5/2

1.0000000000000000  
20.9172000000000011 0.0000000000000000 0.0000000000000000  
0.0000000000000000 17.8076000000000008 0.0000000000000000  
0.0000000000000000 0.0000000000000000 12.2157999999999998  
Al O C H Fe  
11 60 96 60 1  
Direct  
0.5868864357995303 0.2499499109356684 0.2472581325623981  
0.0818835531608216 0.2501240297294195 0.2510292706551840  
0.2491101890878885 0.7500901790914457 0.7531754571524442  
0.2465063723531288 0.2501262119737436 0.2518626505875678  
0.0828121130852718 0.7500827495234257 0.7511639461709648  
0.5837390172791119 0.7499817515155863 0.7460540804768210  
0.4162157540407824 0.7500440006196515 0.7482138599964985  
0.7520594113924832 0.2499409096467562 0.2486993068152488  
0.9167110082612194 0.7500420412300055 0.7510707876164916  
0.9171063740119413 0.2500151680575774 0.2512137292730540  
0.7504964003077772 0.7499831788775738 0.7504699980984090  
0.6693624686072085 0.2499422217163209 0.1824606943224258  
0.8336984354099798 0.7500003413873156 0.6857891491513527  
0.9997458390730574 0.7500678373775302 0.8162670059914002  
0.8344054351831415 0.2499588299270395 0.3150859316993140  
0.7806105552449837 0.1708331941401171 0.1485258631808005  
0.9454331252116854 0.6706487019154717 0.6507206306437947  
0.8891195791504654 0.3296852338302337 0.1502252445036491  
0.7222485311945832 0.8294776930500063 0.6495921430554318  
0.7792538295130204 0.8295192799168181 0.8511615638158823  
0.9453156061362110 0.3296089619795427 0.3519888332435932  
0.8880081448555405 0.6707984288278797 0.8514288238876117  
0.7239367984584255 0.1703171722500438 0.3488461155307286  
0.8879643098524489 0.8292059733400103 0.8513752789736923  
0.7239545045631059 0.3295377814203104 0.3489715176930206  
0.7792909902761739 0.6704529393925650 0.8511738930196523  
0.9454294804220451 0.1704469502992383 0.3519506963478869  
0.8892027438322340 0.1702807882021579 0.1502484088012954  
0.7222657257777336 0.6704473319293834 0.6495966048314510  
0.7805254582119022 0.3291043831428223 0.1484696318483578  
0.9454401108151671 0.8294632060613012 0.6507248567895820  
0.3276356831424310 0.2500942323893396 0.1839568152315680  
0.4998334193321568 0.7499856062656675 0.6812365168117447  
0.6668350912199403 0.7499624529121096 0.8133981623760398  
0.5059360824164508 0.2499772340267930 0.3161406082156282  
0.4489759692259506 0.1676241484849131 0.1451371830959692  
0.6135361212134117 0.6705439115175842 0.6466924846000780  
0.5577585236710295 0.3302741298323256 0.1467830161540613  
0.3859803015307637 0.8288430951414161 0.6489166995416373  
0.4459964469088336 0.8292765748442715 0.8473197050115067  
0.6153952384787404 0.3297121411393207 0.3480628140724086  
0.5547268667598145 0.6712705520021924 0.8460277102678005

0.3836024289822721 0.1675386133666468 0.3549855544691858  
0.5547589937103359 0.8287403373479207 0.8459967309050898  
0.3837197035767404 0.3325831234268053 0.3549542043626498  
0.4459614482105930 0.6707831621845262 0.8474241999499300  
0.6153830799613079 0.1701518765294214 0.3479312825387182  
0.5576610800218940 0.1697060472443209 0.1468129814099183  
0.3859623996520091 0.6712317150802652 0.6490078236323868  
0.4490725909932938 0.3323583749599705 0.1451037013494910  
0.6135226977765176 0.8293595218618850 0.6466557034160849  
0.9994509368624256 0.2500849417271453 0.1860508553624234  
0.1659347177417372 0.7500543111688072 0.6871396570016173  
0.3331775404459500 0.7500965656668701 0.8163238417029627  
0.1642877154351350 0.2501266322703085 0.3167311557530844  
0.1097801990062452 0.1705762089955384 0.1500108142808125  
0.2771758290987285 0.6712841624732767 0.6529154259837296  
0.2183304626212972 0.3299328873228148 0.1514579313406665  
0.0541407380591793 0.8293472024081625 0.6505448504193535  
0.1113990191833908 0.8294699303921302 0.8515225382536736  
0.2750835955619816 0.3300105539848719 0.3527065911726607  
0.2201347369208600 0.6709131432587787 0.8532691694292851  
0.0540275899935381 0.1704827262376741 0.3516653698715632  
0.2201277734241021 0.8293555261068977 0.8531246187036512  
0.0539079320440806 0.3296489786493169 0.3516608450231186  
0.1114054427161782 0.6707512098379748 0.8516160962008776  
0.2749612334868382 0.1700695440891288 0.3526267801437885  
0.2183124837202412 0.1703779448520998 0.1512274542416886  
0.0541386724244130 0.6707080352054163 0.6506091332463267  
0.1098046635868763 0.3296950115868409 0.1501573597325935  
0.2771969274149758 0.8287463619418451 0.6527687789347092  
0.1641254670090757 0.1421577529779821 0.1254011491970284  
0.3312068853705622 0.6431858088094449 0.6259560999544049  
0.1641464278178728 0.3581205328623605 0.1255549876944599  
0.3312236114750097 0.8568435794639381 0.6257724361528688  
0.1656388767159257 0.8577464129104962 0.8771112826540803  
0.9996395298840394 0.3580159955467874 0.3768027151057202  
0.1656514217491389 0.6424905444983088 0.8772135721456387  
0.9997607899847757 0.1420558031876786 0.3767253665707802  
0.1644337319799588 0.0692048616692639 0.0604618364112661  
0.3301276031689763 0.5704908127937821 0.5611594210077336  
0.1644608290944449 0.4310393852113201 0.0605393836887175  
0.9998241984458220 0.9306002855242491 0.5604720644843373  
0.1652572503486053 0.9309840448940302 0.9413848676102675  
0.3284817840243338 0.4328094778177553 0.4422850176648127  
0.1652823348655387 0.5692433696363877 0.9414440214289391  
0.9998941191513976 0.0688484598358624 0.4411682660804812  
0.1071153810360199 0.0344326208651017 0.0276560224293793  
0.2721245386501456 0.5347478559959121 0.5346039886460734  
0.2221972210499434 0.4667882308342285 0.0323957077627693  
0.0573479231282532 0.9648297045939712 0.5274341987294211  
0.1075228168538636 0.9668212286015847 0.9693028807286748  
0.2712890864030381 0.4672182345553786 0.4761071709566254  
0.2225998167406635 0.5343944363450323 0.9740468730289691  
0.0573933600221789 0.0324306345372043 0.4689949868792929  
0.2225730682214034 0.9658559308251470 0.9739473785132610  
0.0572967958617879 0.4675266136997506 0.4692498984507585  
0.1075505906756217 0.5333734281183787 0.9692792343282670  
0.2712073731500017 0.0326187195177612 0.4755568017326772  
0.2221684863621540 0.0334669560138057 0.0322854844477156  
0.0572885883842272 0.5351277152811250 0.5276851945479555  
0.1071423317034711 0.4657687406862851 0.0276431686373985  
0.2720820126634221 0.9650837579371809 0.5340391549342522  
0.5037859518911707 0.1403227747411664 0.1213435142372164  
0.6681415875329634 0.6422002035406734 0.6232428361937974  
0.5038779811544893 0.3596605999973660 0.1213154564503181  
0.6681271492490699 0.8577051829100921 0.6232014459798090  
0.5005990353685091 0.8570373353683981 0.8719012753206654  
0.3287760369071745 0.3596412683368681 0.3783869772225910  
0.5005615409017625 0.6429935426321208 0.8719560850942041  
0.3286612663867104 0.1404279819967321 0.3782818629406183  
0.5035953056099275 0.0671137013274240 0.0571454327002307  
0.6687113144214973 0.5689969034823286 0.5586178218909382  
0.5036608705464478 0.4328767786734125 0.0571275057180764  
0.3301115726449220 0.9294883292815747 0.5608522641799395  
0.5014356301454524 0.9296016779750861 0.9373553827324520  
0.6694221761950643 0.4308568709162618 0.4389153625614304  
0.5014183520876817 0.5704122312538615 0.9373809594211016  
0.3283852680018711 0.0671889879936403 0.4420158869278957  
0.4454622031787077 0.0337011587586128 0.0253009152898393  
0.6114088110462208 0.5326839243821508 0.5295140536829703  
0.5606539904667728 0.4698046821275385 0.0283659694757046  
0.3872465576748156 0.9640473627087350 0.5269929323337920  
0.4443716452024019 0.9663387609536487 0.9665664813474094  
0.6117358985918974 0.4651754369628891 0.4709101768448516  
0.5595102439555394 0.5371702206074650 0.9695261713429365  
0.3863867775451740 0.0315392021330338 0.4687334990081726  
0.5595086661258482 0.9628768006853911 0.9695213825538319  
0.3864594725811918 0.4685721853924836 0.4688288360113895  
0.4443772636753515 0.5336231212504889 0.9665822993668280  
0.6117151719991089 0.0346945925883567 0.4708079339163830  
0.5606117764867320 0.0302349007955269 0.0283804611987948  
0.3872787637889687 0.5360547378826558 0.5271116037835103  
0.4455079576209096 0.4662500029621747 0.0252915770727199

0.6113883053041234 0.9671952664882337 0.5294342296796373  
0.8349442526923557 0.1421965278172622 0.1244563035543093  
0.9997910715575770 0.6424356682247164 0.6255819946773165  
0.8348640164050587 0.3577458761706347 0.1243985184582819  
0.9997971557423695 0.8576290642245992 0.6254991359798578  
0.8336682525212396 0.8576423615785734 0.8762917264289443  
0.6696153404072867 0.3579067922767913 0.3737458121262687  
0.8337113843066991 0.6423348197232773 0.8762890853081063  
0.6695990282913602 0.1419475221850495 0.3736136972158084  
0.8347787424665021 0.0690435732791919 0.0600112498412702  
0.9997828288954580 0.5694197911557829 0.5606678453461332  
0.8347220174098596 0.4308847130972888 0.0599165567941144  
0.6686922377247997 0.9308821134044087 0.5585268757935158  
0.8340338824535155 0.9307400949132724 0.9410128926775536  
0.9997767012185385 0.4311726798668074 0.4413673333801599  
0.8340585056674686 0.5692024261923686 0.9409405720569995  
0.6694028147728877 0.0689968416060719 0.4387804825285005  
0.7770828789853514 0.0349893397226475 0.0275360458944620  
0.9422773481784726 0.5331231408213303 0.5326343392047682  
0.8920817719664440 0.4674421212757255 0.0317924196461336  
0.7264069879706019 0.9652363950080970 0.5266562697548918  
0.7767160645594939 0.9673483495091926 0.9692590763573110  
0.9422874979653316 0.4655320207347001 0.4742052347722174  
0.8917541376333417 0.5350859054875100 0.9734695825958193  
0.7267602822241868 0.0327601641710940 0.4679623679362440  
0.8917499300455446 0.9648063899110332 0.9735477284426378  
0.7267786453715038 0.4670839167383373 0.4681245125885635  
0.7767215804843263 0.5326191658992285 0.9691468687889446  
0.9423874960997231 0.0345215144574225 0.4739889292177702  
0.8921169721396629 0.0324428986474468 0.0318852862222994  
0.7264254929202767 0.5346184129872461 0.5267939918962461  
0.7770485522004806 0.4649741802054323 0.0274133336908610  
0.9423385439217238 0.9669309308833125 0.5324183240585810  
0.9994986822596781 0.2496438776633530 0.1066314458934189  
0.1663991486832066 0.7498984313224175 0.6077206037883445  
0.3341705230371575 0.7498488278583997 0.8957372233886222  
0.1638909615413151 0.2492946254916546 0.3961388846682693  
0.0618346551564417 0.0611708603033116 0.0488249800306280  
0.1024453738476027 0.9376043972415509 0.5484659765509129  
0.2259648589889186 0.4401753598536545 0.4559431531655984  
0.2678606559834874 0.5611582151491985 0.9528112005730115  
0.2678353946093177 0.9391056034672506 0.9526848483179271  
0.1024140730224394 0.4420549156038181 0.4440786917246881  
0.0626234799743845 0.5593056370611846 0.9441391825944108  
0.2258601057458320 0.0595370234847474 0.4551924629818473  
0.2671264598866619 0.0594096920048913 0.0572406799165487  
0.1024005636459618 0.5623122674379651 0.5487378277572283  
0.0618638523836908 0.4390053952291378 0.0487562082929652  
0.2273750116384007 0.9391009603936873 0.5602009513587312  
0.2274074245303124 0.5606128293353728 0.5609657499209832  
0.0625917701339796 0.9408638429243469 0.9442355160062196  
0.2671544866098245 0.4408605977312160 0.0573878769043000  
0.1025261160174240 0.0578508813549105 0.4437926944151163  
0.3268709530484436 0.2496012128922904 0.1044377951949908  
0.4993636601484354 0.7498309589905490 0.6017881804393567  
0.6659459990807719 0.7499213088248897 0.8928254440122132  
0.5072830340485446 0.2501891811888025 0.3956454100812748  
0.4008053832798417 0.0614912379664110 0.0474743149454309  
0.4326160295679577 0.9372305549629516 0.5473838122689137  
0.5667312352325529 0.4381499468306879 0.4488413288028363  
0.6041042179965149 0.5650296114729439 0.9473175713931622  
0.6041190616161728 0.9350527308193746 0.9473133855093896  
0.4311420717367507 0.4424981546331692 0.4427580883374810  
0.3988361675588762 0.5584462136182292 0.9421569608152711  
0.5667112574584039 0.0617252386378554 0.4487503540199607  
0.6060458544453421 0.0551035599580996 0.0530611740267921  
0.4326273485263270 0.5629738250343223 0.5473521136313949  
0.4008688060688582 0.4384157057957193 0.0474520953432960  
0.5661637036064948 0.9416618371639632 0.5537891686619282  
0.5661816912375878 0.5582257658053974 0.5538378525477545  
0.3988481704039556 0.9414773289381793 0.9421298414717239  
0.6061057484838980 0.4449756577355617 0.0530361226144493  
0.4310570635390464 0.0577240774333886 0.4428376568366796  
0.6697692463565613 0.2505331655344537 0.1030131317827760  
0.8337330353105041 0.7495843133599653 0.6063617701433416  
0.9997293766611669 0.7497403643045146 0.8956982536565598  
0.8339056649308850 0.2502474558228732 0.3944926831956522  
0.7321395796752190 0.0624445192323487 0.0488931940731245  
0.7714531792710934 0.9381967273293296 0.5485912742740351  
0.8971854838782876 0.4383745688957965 0.4530613255113041  
0.9367710366184022 0.5623959444679527 0.9521838404089136  
0.9367480802770904 0.9374604166662266 0.9522451434513257  
0.7720489659906020 0.4416149718217795 0.4436996980851161  
0.7314810005921687 0.5579435575209014 0.9443451728813692  
0.8973035403929757 0.0617189697721366 0.4528433240655693  
0.9373444191897555 0.0577899384197565 0.0567909270634108  
0.7714750815086933 0.5616447870278952 0.5487420988773801  
0.7320878030680817 0.4375507490421574 0.0487481821769062  
0.8972198152575053 0.9414481357472093 0.5575373252373893  
0.8971729981597670 0.5586399085518268 0.5577565732289743  
0.7314602584214062 0.9420533432628359 0.9444742239463121  
0.9372925519338676 0.4420518001721230 0.0566945719836827

0.7720298001000258 0.0582155124255969 0.4435029513262370  
0.4166361390439065 0.2500320156372789 0.2503986161660975

Structure H2O2/1 S=10

1.0000000000000000

20.91720000000000011 0.0000000000000000 0.0000000000000000

0.0000000000000000 17.80760000000000008 0.0000000000000000

0.0000000000000000 0.0000000000000000 12.2157999999999998

Al O C H Fe

10 62 96 62 2

Direct

0.0824708167232181 0.2499421489659862 0.2510882222347292

0.2500272442755123 0.7510057292754212 0.7525712787148586

0.2458612143292983 0.2485314780769141 0.2527670575390513

0.0840784272971626 0.7515264666785151 0.7516998508739695

0.5847510703909121 0.7474989599207464 0.7441658264386275

0.4168488115940393 0.7489660591119672 0.7434929042313169

0.7550959864594609 0.2504254274805091 0.2497450058990783

0.9180988948724933 0.7497732335242486 0.7515443869671466

0.9188160081539203 0.2508949892264267 0.2515060453592155

0.7518891838484865 0.7479908545804347 0.7525396357708349

0.6743965242132639 0.2486538088566407 0.1805271092980160

0.8350753420294289 0.7489371411925365 0.6867946790910990

0.0010800901709201 0.7500825652516204 0.8173062243551587

0.8364449708610315 0.2497703937543019 0.3169888373448778

0.7828810292498490 0.1713068974447675 0.1473163721533135

0.9479619664264933 0.6709846578531364 0.6496426560068557

0.8911766674798474 0.3300828622051500 0.1521915717127774

0.7239804217150358 0.8257203527827942 0.6489544935953240

0.7789834712486093 0.8286680191726110 0.8525645171236945

0.9476781629534787 0.3307579498569876 0.3506940979353640

0.8909240742921511 0.6697698763932067 0.8507321117454678

0.7278789927165713 0.1677292980824373 0.3499173074108680

0.8877910400249649 0.8282726840556701 0.8529186562172006

0.7254561219953514 0.3298626446559371 0.3488861502716155

0.7822880497845278 0.6698610169683348 0.8523729905213389

0.9448815226718629 0.1713165443809472 0.3540781405795531

0.8914347756910724 0.1700648001660953 0.1488792899118322

0.7244095403412888 0.6683026191186955 0.6547065144254292

0.7828651336867833 0.3306874709202010 0.1527501846501846

0.9454186212921022 0.8300503275728442 0.6531995304344712

0.3256970069315285 0.2502095794788954 0.1804570653532771

0.5009649062568823 0.7483597579489615 0.6769195034843029

0.6677914585720205 0.7482950763009456 0.8145577201797907

0.5003351711271615 0.2479538064741701 0.3147312430068495

0.4484652994679877 0.1649838921704014 0.1384837248326913

0.6157566903338356 0.6692064150852504 0.6477486943283224

0.5521586992401291 0.3329805139117560 0.1394048925588390

0.3881974525301868 0.8280690745101588 0.6460208717494377

0.4474845208242373 0.8264719811152749 0.8437405389555618

0.6170802885562539 0.3313100505424728 0.3545025043666258

0.5539127391662061 0.6694757508114094 0.8410121391169073

0.3826855694841634 0.1638053345058408 0.3458340048379935

0.5564050720233147 0.8258438768767891 0.8438174356893470

0.3823312105797940 0.3314994324905347 0.3542339083650254

0.4451377830682308 0.6703893401759005 0.8404777373628786

0.6192769919304966 0.1677850319744373 0.3587300219288112

0.5571050459217548 0.1651341606164164 0.1389577368124748

0.3846672514519383 0.6712251135362830 0.6450166317611545

0.4434238345338902 0.3325406162962674 0.1389527146353376

0.6150637715247885 0.8262969193006824 0.6443048447536427

0.0005372103595338 0.2497672779615052 0.1857760087031812

0.1668667883846306 0.7510014846770231 0.6865000373599268

0.3340530314737691 0.7500265474218363 0.8137895923953234

0.1640219917296482 0.2502011281845905 0.3180800917501544

0.1087795706572451 0.1698091900919776 0.1519153161689662

0.2759674069629561 0.6709726685328885 0.6521656081505239

0.2193925360027410 0.3297525049637435 0.1508257449204146

0.0539891307476468 0.8310285754297592 0.6537504260003176

0.1132447534533179 0.8304011751426071 0.8501959475327832

0.2736489869361114 0.3277975946809042 0.3556287371813410

0.2208585813653894 0.6723063420887408 0.8549635517508257

0.0534889351381031 0.1705821303263470 0.3533025597814080

0.2218666364243967 0.8309039232952027 0.8509788361134177

0.0560593314351114 0.3301591051639732 0.3505530199263995

0.1120268766487393 0.6718420076378124 0.8533448093186585

0.2744762472785413 0.1681356484313636 0.3508243273447483

0.2170213315301139 0.1692554368538843 0.1546297585156729

0.0567479752713677 0.6719967919887982 0.6491414705570424

0.1108749197079582 0.3298095001325058 0.1490202264027773

0.2794630164321129 0.8286164016362135 0.6519411461583557

0.533728288039644 0.2828371018834811 0.5220211142781733

0.5702826065409089 0.2187840323794896 0.5631502345169065

0.1632132607464390 0.1411611341317122 0.1276621501991404

0.3298719983146172 0.6428501388304276 0.6239482406633504

0.1651979090445732 0.3582496200834591 0.1249863349825003

0.3333022878953861 0.8564237795994493 0.6241211704559357

0.1673349074478476 0.8587687331780999 0.8759657396623456

0.0018725603758548 0.3589622453896771 0.3757891916419357

0.1664478162351080 0.6437879784950854 0.8789133562231781

0.9993123582801529 0.1426506582022375 0.3788350980998166

0.1640733705343216 0.0686431802717755 0.0621840396562191



0.3286030858219267 0.5697551576763281 0.5602149637396763  
0.1656470506628541 0.4316453150094703 0.0608373216008383  
0.9994310210143633 0.9317146400844825 0.5633235250122210  
0.1665082533296684 0.9313314847353977 0.9415084101240063  
0.3271953573981473 0.4313119141816116 0.4432367023565558  
0.1662429393969247 0.5704650230351989 0.9429340614277794  
0.9992580274034244 0.0696651821704144 0.4436748531559223  
0.1071498472829621 0.0323165727746466 0.0311927390355028  
0.2707678669527136 0.5326675696771227 0.5368701446657944  
0.2232534527258285 0.4682957345950414 0.0343769132548381  
0.0569382956297213 0.9665627383456670 0.5316242639207019  
0.1083133405151951 0.9650926653885805 0.9720088267639166  
0.2700752447923240 0.4648072748032309 0.4792473451183257  
0.2235905105509590 0.5361548954922470 0.9766065250895005  
0.0568634749989954 0.0340823374732415 0.4730448075961686  
0.2234769743863926 0.9676006472263262 0.9725651173445942  
0.0598348560133936 0.4685372501550327 0.4673102392214619  
0.1086319497620180 0.5338576486910585 0.9693872752448328  
0.2719656909945918 0.0311920949951204 0.4748090126502990  
0.2222791193011419 0.0348434803289606 0.0317603599141138  
0.0599652600135409 0.5361021878519779 0.5257968686870415  
0.1083220392552356 0.4659835933441419 0.0270932827903838  
0.2735716087274794 0.9639827863368071 0.5338010839118500  
0.5024011970350903 0.1367521395136037 0.1140181841768241  
0.6705157371286224 0.6408379963050178 0.6261838332910323  
0.4976050615722361 0.3609753826522398 0.1144803421254616  
0.6700272527657606 0.8539921330851872 0.6218416717441423  
0.5019499437693313 0.8540852992173634 0.8685378147655275  
0.3275847639858125 0.3579490878895332 0.3796240732523705  
0.4993662417498120 0.6421425454073997 0.8658958267043104  
0.3281366888667444 0.1378168483666940 0.3740671929494839  
0.5026905345041436 0.0638819671242638 0.0503514098474466  
0.6714810054865559 0.5684936198357529 0.5610643268920362  
0.4979235591482575 0.4337131244314480 0.0504532385831156  
0.3319980680143685 0.9289675117668480 0.5595056450745407  
0.5022679230531161 0.9266071107714730 0.9327579864122189  
0.6725898281629804 0.4317470846172012 0.4410594993822179  
0.4987138234577722 0.5701743682454008 0.9311435309707877  
0.3287911366926736 0.0656575643815539 0.4396030726903735  
0.4448570148534289 0.0300705260919190 0.0185562600485276  
0.6140947696771782 0.5344226388921451 0.5277103783766033  
0.5558633457859863 0.4681751296913369 0.0208884327733189  
0.3888223599681658 0.9638007760185836 0.5248423427496053  
0.4446744564556410 0.9625074148888857 0.9606874102925291  
0.6146962293201531 0.4674186512035423 0.4684743322535979  
0.5562519665990424 0.5353939071117778 0.9621582821404400  
0.3872305569839458 0.0309173823702378 0.4658714322976324  
0.5600618570772087 0.9605733845580610 0.9643000146980918  
0.3850095162467524 0.4682616541166772 0.4670971870622088  
0.4407530346994190 0.5356937240282593 0.9606445689387905  
0.6160268777235409 0.0299270948445193 0.4669618514649546  
0.5602995750898589 0.0281016956625213 0.0222805900415426  
0.3857061691643554 0.5361646327884518 0.5242839715577635  
0.4403970629750305 0.4685473626560047 0.0195042133340809  
0.6146253917000765 0.9621972698128654 0.5245097541918992  
0.8370837506637767 0.1422149506696034 0.1230679131813444  
0.0023989136536805 0.6433141321826281 0.6243566757145945  
0.8370758359300082 0.3586909672002763 0.1269708355723760  
0.9996938452243813 0.8588292850072575 0.6282736953521568  
0.8335927731465207 0.8567962041742911 0.8773142052159423  
0.6722617111580402 0.3591126505826908 0.3765380527684256  
0.8366062285397307 0.6415599548861358 0.8767234253221801  
0.6743291193573949 0.1389041559802269 0.3780257456613612  
0.8362624299824224 0.0689718163096956 0.0589441726063425  
0.0025552793719523 0.5702182723052688 0.5595398460413430  
0.8370652637012557 0.4312176033335480 0.0616261922128592  
0.6714992797332928 0.9268285615410515 0.5575699379023313  
0.8341880609713749 0.9302605380880902 0.9411128806957488  
0.0022642590481449 0.4320026656456254 0.4403188638923611  
0.8368911132885298 0.5687374961620346 0.9416539252978218  
0.6743108811550775 0.0650881337018362 0.4403840755260917  
0.7782535205400121 0.0356373166394066 0.0264339367060213  
0.9449939843423435 0.5337380095897305 0.5323355133588538  
0.8946257183908113 0.4657693632260730 0.0297198253826360  
0.7297918216617333 0.9617286759104851 0.5306808082324436  
0.7772318754409753 0.9678098876173664 0.9686885139786210  
0.9448415975738819 0.4661288024624832 0.4739926851740986  
0.8945027345667106 0.5331068580144043 0.9707923344914623  
0.7312172811479793 0.0295281742682879 0.4730390068204068  
0.8922050098284159 0.9635906731786364 0.9735457866403602  
0.7299885606458354 0.4658826148559738 0.4743397240448729  
0.7793487765232791 0.5340426145721938 0.973451533634997  
0.9417887542562091 0.0347716201245333 0.4752867778615245  
0.8932214470897338 0.0314338285664269 0.0312583024769045  
0.7294209879521425 0.5331381463237654 0.5333246576351569  
0.7794216169338525 0.4666488813345179 0.0322338065319793  
0.9418471776887085 0.9673175072284770 0.5339821753350775  
0.0004344421831935 0.2318062853785078 0.1107397141165026  
0.1671731468215655 0.7298397258878662 0.6132128388792657  
0.3358633499229176 0.7482032740297087 0.8930949024312115  
0.1636514848863003 0.2729063641742804 0.3903812088940593  
0.0615794922670654 0.0574726826041931 0.0545124655131289

0.1020567286965926 0.9398195429107272 0.5537852537557627  
0.2248531768942565 0.4368014326354586 0.4615900585931805  
0.2688231996154335 0.5634774237950486 0.9566404368377348  
0.2690693366581568 0.9423967641411262 0.9493226314733278  
0.1049159680670351 0.4434042618933925 0.4412818678793377  
0.0636545881104872 0.5593329603811480 0.9434998487496105  
0.2264548437723979 0.0579088681907654 0.4551674711218197  
0.2668526954590396 0.0622312222965370 0.0553987912945810  
0.1051545934430218 0.5633484308445279 0.5461100300986431  
0.0631315407831169 0.4385679807527327 0.0469452606193997  
0.2293175367713398 0.9375394369837919 0.5611837737711176  
0.2260994184841329 0.5576473288861794 0.5651996557246084  
0.0637107454593276 0.9377669942085368 0.9483297327564543  
0.2682751570639220 0.4429461667793159 0.0602308012167507  
0.1019182528245644 0.0602185838561361 0.4489946665385228  
0.3242733396816172 0.2798715202111940 0.1135536080514124  
0.5010948271201138 0.7625853001379806 0.6002152411908673  
0.6661690838290569 0.7689545724163070 0.8880956180937147  
0.5022773971060872 0.2583764885212645 0.3950463898487933  
0.4000613155109665 0.0577809886378709 0.0398956736040976  
0.4344911933185513 0.9376652359989422 0.5451086823946730  
0.5696653741738351 0.4424271614340490 0.4419165283636950  
0.6012730681104689 0.5619576861095991 0.9389826272017457  
0.6049235153659671 0.9332828884306645 0.9421409515157128  
0.4296377122517470 0.4426463508355232 0.4399663920882145  
0.3959468173213242 0.5622055908075151 0.9362417568949298  
0.5713724178844388 0.0563650906430516 0.4415292136848438  
0.6053725587714391 0.0539951094135616 0.0466629163933161  
0.4308677960779076 0.5641749402668350 0.5423643545134745  
0.3953128664163510 0.4420859454881628 0.0422753771860864  
0.5690198707205095 0.9359946860412149 0.5449233536376390  
0.5688861385622644 0.5612806242590096 0.5489786850905936  
0.3997270265550545 0.9366266523918193 0.9356642901200843  
0.6005985806376545 0.4412546869935741 0.0446264878238361  
0.4314916854768600 0.0576211756971579 0.4392525092079423  
0.6762026499238566 0.2267954489415926 0.1075682995649149  
0.8347104236916491 0.7620524676483512 0.6096744451483134  
0.0012018631907516 0.7296288834236587 0.8910177085560489  
0.8366751164290889 0.2268513204547148 0.3891509859652011  
0.7334975210528025 0.0636472284297141 0.0473453344001027  
0.7742516626520131 0.9348869373383342 0.5562252409789368  
0.8997341256503997 0.4387264107210209 0.4535273011509194  
0.9395930298596079 0.5589040692990809 0.9463001836841689  
0.9368507147352638 0.9353233783790238 0.9526920891433933  
0.7751219428258478 0.4388534442417765 0.4530733393264459  
0.7342498070595375 0.5607748104923108 0.9511958649804931  
0.8966369596641530 0.0613174529846331 0.4528774143986309  
0.9387183841177618 0.0560944117208033 0.0561119609262569  
0.7741900937954790 0.5592149640464217 0.5589609824618934  
0.7343754706893807 0.4405472350416016 0.0564154829413670  
0.8967460125098152 0.9414049205416443 0.5581885893475150  
0.8999948426341439 0.5592720014718632 0.5579577463264256  
0.7317260729431154 0.9431715342842895 0.9438684815337980  
0.9397041311970769 0.4389937028715218 0.0520558787769623  
0.7768278821154516 0.0557432528250721 0.4526770472457624  
0.5673271295449545 0.3136134172108681 0.4873723560405955  
0.5814160829413176 0.1925488986696668 0.4938621020406190  
0.4137872918963241 0.2476699520750275 0.2463943213996466  
0.5847190796164853 0.2496613994842904 0.2407878986795197

Structure H2O2/1 monomeric Fe S=5/2

1.000000000000000  
20.9172000000000011 0.0000000000000000 0.0000000000000000  
0.0000000000000000 17.8076000000000008 0.0000000000000000  
0.0000000000000000 0.0000000000000000 12.2157999999999998  
Al O C H Fe  
11 62 96 62 1  
Direct  
0.4137089052055928 0.2483317632988118 0.2467185696802832  
0.0839458873386757 0.2498881408897917 0.2510231793771513  
0.2504030252925808 0.7508392899616663 0.7495935924670196  
0.2490113000592455 0.2485812349821021 0.2493677392395595  
0.0842693165222908 0.7513156700345530 0.7513003494630023  
0.5842906913883488 0.7477712851181643 0.7476162953955554  
0.4168379783817011 0.7490790902946340 0.7438601098133959  
0.7539435722787831 0.2502511044578949 0.2496048084403579  
0.9181123195125955 0.7497192495140934 0.7514969615119301  
0.9189082126491273 0.2508532705617555 0.2513182629161467  
0.7517007135739172 0.7480738097942290 0.7530342975639274  
0.6722990054329364 0.2484244817481484 0.1825102380487084  
0.8349469856639995 0.7489939506128408 0.6869937417799830  
0.0012061360638476 0.7499085182218590 0.8170807799009696  
0.8359148309085748 0.2497398652694722 0.3166204064433958  
0.7823223719361596 0.1711494237955457 0.1474995913875073  
0.9479754313188746 0.6708665799785659 0.6494685534386596  
0.8906287436589391 0.3299188698388102 0.1523167958874025  
0.7236033108819622 0.8257737674171596 0.6495747953171171  
0.7789114041290016 0.8286396421959563 0.8528338681072570  
0.9482643696031245 0.3305729664271405 0.3502334172742818  
0.8908871154903668 0.6696171895112358 0.8506545991108880  
0.7263700036164490 0.1678948226488908 0.3502070257137403

0.8877510425055395 0.8282872775200834 0.8530414004238016  
0.7241334320252915 0.3299874162712883 0.3487500899423408  
0.7822260272461610 0.6699106500532137 0.8525890372664673  
0.9454459962186380 0.1713634196209176 0.3535662607859765  
0.8910152740410492 0.1702232827723617 0.1488794425799380  
0.7239169153216011 0.6685267105890736 0.6555294435140758  
0.7821913526605221 0.3303883430629544 0.1523827189059702  
0.9454783219925187 0.8301153662593534 0.6532521066122723  
0.3313542305371224 0.2494152190995392 0.1812501314978986  
0.5010469379840027 0.7484312061009311 0.6792710831923275  
0.6674309815136088 0.7487236680432358 0.8164643798483606  
0.4950178554055799 0.2485757719434737 0.3131686546098126  
0.4438234845473886 0.1687047497188132 0.1442701799502440  
0.6152934649694678 0.6690930503830913 0.6506912374222203  
0.5494142310467770 0.3322805527754129 0.1425994427303257  
0.3887888206485379 0.8285058726056875 0.6451918807781502  
0.4466651146694802 0.8275625290302338 0.8447083178245968  
0.6157130813880297 0.3312597722911101 0.3567748210120185  
0.5531219740203663 0.6688585663012694 0.8447445693803758  
0.3859442984700602 0.1682159096981793 0.3433160700752332  
0.5555375309489889 0.8276969607772311 0.8467667239179173  
0.3856445542846583 0.3292002801151583 0.3475380886121921  
0.4444877104216779 0.6700585282873236 0.8421753061437465  
0.6177105906558892 0.1680605447348961 0.3604307256719732  
0.5524057109561274 0.1663059073608180 0.1431137477375430  
0.3856601224505912 0.6704261777396038 0.6445852599238963  
0.4407887574451662 0.3291068633247237 0.1441682434588965  
0.6147079269551571 0.8264026726986243 0.6463271621141685  
0.0013204722586585 0.2497897857492691 0.1858187635456291  
0.1671648845922189 0.7506109756164573 0.6848418227454811  
0.3339302989882653 0.7501322758175204 0.8121367428965307  
0.1664442050956730 0.2499815463516325 0.3159794579186342  
0.1105502587457319 0.1694954561124811 0.1523792400887672  
0.2769144979393410 0.6697046351735630 0.6494944208323347  
0.2218751200170278 0.3293238484152098 0.1484763565821580  
0.0540561186615161 0.8309013332493046 0.6535441416563841  
0.1136045813840934 0.8301475767393237 0.8496567507551874  
0.2770285430428832 0.3272859457038927 0.3523206771747709  
0.2212155980780229 0.6720428123362717 0.8530269586308509  
0.0541663511661196 0.1708103936555642 0.3535329893660891  
0.2222074445099746 0.8308469282480065 0.8487044431708684  
0.0567818522993785 0.3302478568660502 0.3500272850317214  
0.1123840954705639 0.6715718177662040 0.8527605201574171  
0.2775772764756702 0.1684732393064740 0.3468240841428922  
0.2190021377215884 0.1701099670543492 0.1506641258163941  
0.0567691579881185 0.6718827983933269 0.6489382588330203  
0.1131421580348580 0.3292965123587941 0.1487951402207574  
0.2801461195005633 0.8295483791318136 0.6489706217150936  
0.5312928081110737 0.2823187492566896 0.5214963756782344  
0.5687875962198676 0.2190716005289254 0.5638902110708873  
0.1649127856314458 0.1414257370956380 0.1262965320609505  
0.3311436618748949 0.6415600137159296 0.6225758116467446  
0.1673527971445259 0.3577730993716044 0.1240819888948510  
0.3342214837226581 0.8574555252094800 0.6222925201239932  
0.1677999027605509 0.8585425078255827 0.8748366868916984  
0.0024774346119125 0.3588126503399774 0.3753046886046079  
0.1669338463165880 0.6436005022209199 0.8779438252642754  
0.9998995791687458 0.1428352126241325 0.3786393249142174  
0.1653353412817573 0.0685622343892410 0.0614073472194984  
0.3308707052609047 0.5679387756462236 0.5590070490458982  
0.1672735176338903 0.4314449131967864 0.0604907866666881  
0.9995807111279118 0.9317616758485583 0.5632936264907524  
0.1671726278189938 0.9309798626889363 0.9409525764667643  
0.3313994471722531 0.4293866377066529 0.4403646324801154  
0.1669895989565368 0.5704183665197241 0.9426129231168534  
0.9996555044476905 0.0697729830995968 0.4435172529323080  
0.1082575416842352 0.0323293822751415 0.0309010639630475  
0.2736107882108555 0.5298535771345818 0.5346991707533615  
0.2246243527120899 0.4685472367016968 0.0338160340468843  
0.0571328438493356 0.9665259542509884 0.5316229241465283  
0.1091348083828205 0.9650094961430680 0.9718493138104616  
0.2739286748029122 0.4621819921112872 0.4765159410845742  
0.2245279467732236 0.5364607827236706 0.9761583963239937  
0.0571739278343538 0.0340416452679870 0.4730054451426590  
0.2242628295621078 0.9670171465257589 0.9719432043181535  
0.0601246218849742 0.4684855588397970 0.4672507852896186  
0.1096001842156472 0.5334783165429484 0.9696654715105684  
0.2755372427056051 0.0339515016104135 0.4720806784226741  
0.2233506449015862 0.0343623838597411 0.0309122951739919  
0.0601203498126802 0.5360326472482814 0.5257870621590136  
0.1097213981049508 0.4655493138130039 0.0273172766311253  
0.2760758325726874 0.9667423874890607 0.5313227946376100  
0.4972454680255641 0.1391980453178147 0.1185161189128898  
0.6699256439590433 0.6409751431572525 0.6276513753320402  
0.4943392605646514 0.3588837577588612 0.1180618457571410  
0.6695509877868540 0.8539898283263906 0.6228078426467457  
0.5007699910792854 0.8558748273785114 0.8702659039118874  
0.3314947459499712 0.3564323783428036 0.3753249103975094  
0.4984141109885621 0.6412365079955353 0.8683043836286001  
0.3319873452656178 0.1402329528269424 0.3709663555024352  
0.4975194975168100 0.0664548255330529 0.0537227820379200  
0.6708408653392002 0.5688893320942912 0.5617063841277090

0.4943648145814605 0.4314377519031761 0.0528675314963993  
0.3338642004954790 0.9305798069405108 0.5579343077609443  
0.4998881577549332 0.9289975657522620 0.9342559584087806  
0.6717863782278828 0.4321028810186196 0.4413968803424970  
0.4969477064128454 0.5684972523756346 0.9327951913184966  
0.3327426659436010 0.0679296555994200 0.4371126696481211  
0.4404715757743058 0.0313791549999004 0.0204724079445737  
0.6134491345276341 0.5348921951113516 0.5282415805097602  
0.5526173680893670 0.4654744507951573 0.0233578131506059  
0.3911024415168029 0.9648673344024546 0.5236549471651067  
0.4417109382298112 0.9639699259067871 0.9617660190282104  
0.6139646454131517 0.4678996306157006 0.4689816905489288  
0.5538999716310925 0.5326809042329795 0.9645194014701973  
0.3905912435715038 0.0321257220587673 0.4644622817031535  
0.5568835402938400 0.9643000653239047 0.9671038209055963  
0.3886743979967333 0.4671753740941572 0.4654276714391565  
0.4386603681065441 0.5343420269392594 0.9617438476684647  
0.6149989036823655 0.0295975198583752 0.4673547655603466  
0.5556863817970359 0.0316057447103835 0.0257529513440328  
0.3884068610667679 0.5349609346909885 0.5233546146219559  
0.4373742450771585 0.4671110734746436 0.0208460262059797  
0.6138838301891486 0.9618094886405798 0.5247869358135603  
0.8366391482464265 0.1423005173623217 0.1232080634148852  
0.0024132677436975 0.6431788565699416 0.6241829797095059  
0.8364842527493486 0.3584161632639947 0.1269462742688950  
0.999772225515058 0.8588231215448063 0.6282158086918799  
0.8335523799667870 0.8567945348443309 0.8774553756734337  
0.6711273240011718 0.3592123269217939 0.3773853045576289  
0.8365471600364622 0.6415074765142205 0.8767539678758681  
0.6729251581899751 0.1390718506683956 0.3787836776384804  
0.8359766523064730 0.0690453712497099 0.0589952922069447  
0.0026492796721992 0.5700612790708706 0.5594117969087092  
0.8366178993107671 0.4310295069660721 0.0616285231399566  
0.6708678730951175 0.9266545727670947 0.5578216997912803  
0.8340673736550366 0.9303017653483862 0.9411518846449712  
0.0026367005222074 0.4318481537669576 0.4400487591226108  
0.8367362001258715 0.5686398489299329 0.9416360538731754  
0.6731313220189651 0.0650497326123572 0.4406530277054504  
0.7780161403984638 0.0356413196007951 0.0263618950539947  
0.9451580539057095 0.5334532672620842 0.5321164582703466  
0.8942474684588860 0.4655137991353242 0.0298278284519833  
0.7290238200565387 0.9617688364662685 0.5305460236487436  
0.7770695228871445 0.9678180960767254 0.9686020128514516  
0.9451323744572487 0.4658533991312204 0.4737099742157166  
0.8942693516654064 0.5328670243114044 0.9708922298572037  
0.7301734378424827 0.0296183788191762 0.4729551552234512  
0.8920425566129285 0.9637197683636167 0.9736147369394809  
0.7292369435595877 0.4662770331078953 0.4744301641756836  
0.7791322233271488 0.5340419111506363 0.9733363119449393  
0.9421193876913252 0.0349475027405130 0.4750881417525093  
0.8929873582450517 0.0315708004512378 0.0313399379915754  
0.7287288742319077 0.5335377685410772 0.5335228128153016  
0.7790616299442097 0.4666280939150659 0.0321021725944221  
0.9420679914592989 0.9674964088804950 0.5338421997323081  
0.0012468826880928 0.2319811318891646 0.1106938158931416  
0.1668272571360788 0.7292917570023565 0.6116379162711849  
0.3349667835213574 0.7480036086363590 0.8914907251548400  
0.1669218717750269 0.2711496237780732 0.3892575096325142  
0.0627785681322264 0.0576812149273322 0.0543235757043167  
0.1022179166736920 0.9397109181033043 0.5537846334076386  
0.2289178589757532 0.4339232419790955 0.4582255887384541  
0.2695974950852966 0.5641115048575944 0.9561084613983941  
0.2697520553451154 0.9415595316230182 0.9487414323696934  
0.1052665678612600 0.4434285049441577 0.4413646187020621  
0.0643916719997143 0.5586479099935551 0.9442941203201484  
0.2302621711870606 0.0609809995919126 0.4517594648385616  
0.2680576756954725 0.0615440157875542 0.0542884558082217  
0.1052671146381861 0.5633326714267467 0.5462298590271246  
0.0646938655617985 0.4378489987515223 0.0474417713664155  
0.2312678287133376 0.9412485283899641 0.5579324210581779  
0.2284075577078070 0.5538514766110126 0.5623474929216946  
0.0643655311399696 0.9379023681590524 0.9485339388799189  
0.2697925493844205 0.4434088628308213 0.0593469539955128  
0.1022930890456111 0.0600471789178687 0.4490143828697777  
0.3311454996246707 0.2748217887762020 0.1108406081086822  
0.5017762269960329 0.7628124169576138 0.6026093112434980  
0.6665626089601965 0.7696476744832714 0.8898917338059471  
0.4966417680115422 0.2567594072439577 0.3937080953573918  
0.3949282620043145 0.0576199462566071 0.0413852996234934  
0.4364524721521058 0.9380634060999949 0.5442299091120069  
0.5688898180118308 0.4428811827791382 0.4427404005296141  
0.5994150080059869 0.5583758370620566 0.9422069200617168  
0.6024546485563304 0.9382814759507844 0.9459410141845638  
0.4338284710136214 0.4426543687638776 0.4385394570749591  
0.3940678536560345 0.5612338149167488 0.9370595254730121  
0.5702230720858826 0.0558756845638763 0.4422732783899815  
0.6003943839357927 0.0579105437588019 0.0510153329651953  
0.4333498410992438 0.5634126669348140 0.5418390232403943  
0.3917752745821037 0.4415807241103505 0.0431570396057668  
0.5683779675590954 0.9353853094262425 0.5452697436607269  
0.5682727460032054 0.5617642911633347 0.5496448706338899  
0.3971630000299733 0.937368487756826 0.9361021892934813

0.5971960657622577 0.4384133935144576 0.0475812605691141  
0.4354388463659781 0.0578060665526056 0.4383450031407048  
0.6732576358041928 0.2289476966186523 0.1081006642237688  
0.8345187706466125 0.7620069738412462 0.6098342001541396  
0.0013809507771936 0.7296206121517594 0.8908897791977600  
0.8361089850683348 0.2273348770623652 0.3891309712782751  
0.7332259268201164 0.0636099263609690 0.0471711198941792  
0.7736582720602267 0.9352000735726184 0.5557555561327961  
0.9000428859792460 0.4384072833385982 0.4532146111414760  
0.9394263563970735 0.5585830930356378 0.9465249689015672  
0.9367177920257260 0.9355014979458355 0.9527604793731377  
0.7743893555309849 0.4392540215271513 0.4531233329512208  
0.7340864178273762 0.5608970209754482 0.9510399346899212  
0.8969759993036491 0.0615195189723700 0.4526537522640112  
0.9384938147060020 0.0562240947403415 0.0561713762020856  
0.7735792607900324 0.5594920591841006 0.5590017043622520  
0.7339362129743845 0.4406634913745789 0.0561382307369588  
0.8969080083712081 0.9416712089978247 0.5579534421849073  
0.9001030460958747 0.5588808141717377 0.5576943294417986  
0.7315769345185370 0.9431818573696952 0.9436720594916506  
0.9393105682638090 0.4386997909904333 0.0521935125473221  
0.7756785121586802 0.0560651227383817 0.4524560593261618  
0.5649401825641451 0.3130264339145067 0.4858033426501250  
0.5802024961489419 0.1924803966428887 0.4950616938887646  
0.5817600536141160 0.24968899361312874 0.2449759972056434

Structure 2 S=5

1.0000000000000000  
20.9172000884999996 0.0000000000000000 0.0000000000000000  
0.0000000000000000 17.8076000213999990 0.0000000000000000  
0.0000000000000000 0.0000000000000000 12.2158002853000003

Al O C H Fe

10 62 96 62 2

Direct

0.0815504651695593 0.2516241242533484 0.2531801495696658  
0.2499026040309187 0.7555277124601301 0.7523333150895166  
0.2443175708014305 0.2518404859269631 0.2526283491654962  
0.0839612197083347 0.7530081490503626 0.7536016505167967  
0.5852124010462391 0.7488537249073850 0.7463980665859339  
0.4168437700300124 0.7547746350210984 0.7422356177194945  
0.7552668628033217 0.2469321709847295 0.2517025259419234  
0.9181317877067100 0.7484174987267036 0.7565798941167448  
0.9183617556190533 0.2506375318344682 0.2548477039837387  
0.7523149155699566 0.7444920419922239 0.7604348244545981  
0.6716804803718157 0.2363828101397840 0.1891947291854991  
0.8353845161706317 0.7455921718720391 0.6929751021562691  
0.001386698786805 0.7503159856258420 0.8205489477769432  
0.8364754714400114 0.2486671843470133 0.3206901716213222  
0.7866550538789496 0.1735621407416561 0.1446716278946445  
0.9486013430518483 0.6702135392554973 0.6553269919344760  
0.8878202572558356 0.3280171327497582 0.1559617089877688  
0.7265840103838255 0.8193625191505822 0.6556803519784682  
0.7795991825108332 0.8268082139032121 0.8592705540661580  
0.9470928982337521 0.3320125866524404 0.3524081975320459  
0.8913159666273174 0.6679129679657628 0.8566746409711947  
0.7323816958461495 0.1617955835304017 0.3521239526583612  
0.8884079427699485 0.8265706203762414 0.8578759677612422  
0.7220999367331372 0.3235010109449188 0.3570390433254355  
0.7826454834842019 0.6686650831714626 0.8601009156402062  
0.9454200407134465 0.1723073957806824 0.3586471532924341  
0.8947457950449134 0.1685560903843300 0.1528440410825920  
0.7237775054791613 0.6637846358621274 0.6639581838453673  
0.7793688369365814 0.3308227494191955 0.1605365213760283  
0.9442879358100261 0.8295719138524765 0.6561200052263884  
0.3237669757008842 0.2537732352698830 0.1801393107900943  
0.5013908277071715 0.7516317483734761 0.6773810031411821  
0.6673442612074816 0.7471283294337393 0.8203161291891188  
0.4990786861318730 0.2635012980165032 0.3089886794498121  
0.4462336976108905 0.1686268452114309 0.1406881139103540  
0.6153175246136815 0.6679281295254653 0.6520333724134215  
0.5459518243610514 0.3327577792873356 0.1180432767072477  
0.3878252011849591 0.8332879430215285 0.6458346293903942  
0.4486566190350376 0.8318168791033275 0.8414260901497238  
0.6181604647484842 0.3488974179993535 0.3186478230651493  
0.5515224809143243 0.6734605810892801 0.8434815612787521  
0.3835433862485854 0.1702830029165045 0.3479128691005218  
0.5574987999825509 0.8294911515488458 0.8444093866471424  
0.3797870562147838 0.3373916181900376 0.3514759499304019  
0.4427656860361602 0.6763372775344698 0.8402110202440626  
0.6799848507626139 0.0878754229494697 0.2294689984771098  
0.5546989814492649 0.1667287616467031 0.1482518352003207  
0.3846956383257272 0.6766495375698282 0.6421141787175635  
0.4375459497591687 0.3362294047554287 0.1315445680504757  
0.6177908935323021 0.8234421066201384 0.6445229937809279  
0.0000280033501462 0.2512230727349830 0.1882099378729180  
0.1666662650952764 0.7542011281226638 0.6873131921996497  
0.3339021989438790 0.7554070165893964 0.8129509551109100  
0.1632341163469293 0.2525225215087907 0.3193753311217558  
0.1080522588085891 0.1723958245670538 0.1530131384936382  
0.2759305705615814 0.6767298098609420 0.6497390407020686  
0.2179910297653364 0.3315139868339086 0.1498066926457458  
0.0528449197542020 0.8311415464815151 0.6556361809621687

0.1123793174186945 0.8325953056589979 0.8519446985150445  
0.2711513940856163 0.3330723268055478 0.3542539615160001  
0.222423997729603 0.6750516933628181 0.8548913535887521  
0.0539527936349325 0.1707306551407870 0.3553606824648448  
0.2209799407733409 0.8344404017264304 0.8508475300639246  
0.0554499994689049 0.3308155152249599 0.3532084460810255  
0.1135945494834300 0.6745194809839984 0.8546654367077070  
0.2751918993996922 0.1727391840951519 0.3510186908416334  
0.2162304360922459 0.1713429222374045 0.1563828603889888  
0.0573189797051344 0.6724800972346505 0.6522397038505914  
0.1095651188954418 0.3330683701168172 0.1508402010830262  
0.2791323996100618 0.8342115284729992 0.6524889522293349  
0.5768151569078656 0.2210969279136694 0.4902825964487178  
0.6067405873569660 0.1929410785240846 0.3901387255997831  
0.1624008550587244 0.1434765196742926 0.1289577702723998  
0.3297699480354442 0.6486556155992393 0.6210515075037201  
0.1637949937258088 0.3608037263340759 0.1252907614078603  
0.3329444602688981 0.8616865083046520 0.6240578504467492  
0.1663731353099822 0.8615996255622150 0.8767712356070024  
0.0012298464263030 0.3598280826127916 0.3782225412133807  
0.1680708463149372 0.6464491310902399 0.8793970487545711  
0.9998197550607438 0.1430894882816084 0.3819809846395465  
0.1632283510608196 0.0711246180445610 0.0633469347607814  
0.3278986718078329 0.5757664375362006 0.5567854354425662  
0.1649914765356062 0.4341795298907909 0.0610742849980088  
0.9983020827552830 0.9315807178408150 0.5655890632782711  
0.1655035731268244 0.9340812185539914 0.9423864158620210  
0.3250210381345453 0.4374087192807302 0.4398131403486710  
0.1674413449455797 0.5729999807700551 0.9431410865114117  
0.9994521551998979 0.0698432321313268 0.4463666053886383  
0.1062542470689257 0.0345773892521021 0.0332528083800052  
0.2696481025065752 0.5398317166700213 0.5326412368872294  
0.2230138190234407 0.4705944643271136 0.0364626022715004  
0.0561148613249764 0.9670119735506748 0.5368207099413754  
0.1073559434993039 0.9674452607634147 0.973895271662552  
0.2682018241491792 0.4719641999812871 0.4750642837517646  
0.2242586972852422 0.5384387881228508 0.9786738844679139  
0.0567066178806071 0.0346291574941686 0.4784630306012355  
0.2225338285611474 0.9705757483531812 0.9725410322677116  
0.0596776167835893 0.4687230839002185 0.4702429653686103  
0.1094342497207495 0.5365812886662530 0.9676447630282874  
0.2726522128756899 0.0356561836087009 0.4719006350428369  
0.2214244822777433 0.0377166923890493 0.0319359283152182  
0.0601752432611821 0.5360900162768180 0.5291643301713098  
0.1081842546986878 0.4687331428472550 0.0253749241787890  
0.2738225505755071 0.9683941964052888 0.5307184674748905  
0.5005236853221274 0.1391341809219014 0.1200414204986999  
0.6699075980517094 0.6383418399033146 0.6318272237589390  
0.4910581814324293 0.3632645026729334 0.1014693926395692  
0.6739338273519732 0.8478150391457301 0.6226677275379426  
0.5031445740104179 0.8582803688984432 0.8686287008547038  
0.3250117282879099 0.3637579914639731 0.3770614372605225  
0.4964561310241051 0.6469921737039186 0.8659480477212700  
0.3289989995949780 0.1431844697834747 0.3746983455418371  
0.5014514821766447 0.0660494427140031 0.0564872609484137  
0.6707863889118719 0.5672038065991359 0.5635626635674230  
0.4915928238306854 0.4366290032677793 0.0409478197467859  
0.3320352763426149 0.9339805255817158 0.5590197303390993  
0.5030184641479641 0.9299599933650595 0.9353006552418545  
0.6723051664062321 0.4336296225769706 0.4357292397555377  
0.4944369393407320 0.5744385282873387 0.9284017209511332  
0.3297534064297332 0.0707463300861317 0.4393791341199493  
0.4445195842151735 0.0350262138736782 0.0150937673322471  
0.6136072028203552 0.5348722301153417 0.5256341828153120  
0.5501861499858036 0.4708459104972695 0.0150221385185696  
0.3891817481431759 0.9690975028546104 0.5264979881257734  
0.4453051153379675 0.9680331904259952 0.9557838923452526  
0.6143904965806039 0.4696071414830101 0.4623617191146412  
0.5515668857753635 0.5390818773799794 0.9595610943394999  
0.3880317838195651 0.0362591177827124 0.4675504023245255  
0.5598451703067847 0.9608755165126063 0.9771786648916285  
0.3832441990018843 0.4734182822136030 0.4639640173282240  
0.4358246433019650 0.5402646386389901 0.9542756894729622  
0.6379765334221228 0.9975995005019886 0.4088816636115344  
0.5591869794980533 0.0276944138165401 0.0372351290176639  
0.3846730584086790 0.5412480199490443 0.5212455311303683  
0.4343555225367397 0.4721705561025105 0.0103711900011153  
0.6296007819479951 0.9381876648240872 0.4817416409240357  
0.8402090656829874 0.1423448314637404 0.1237491521858566  
0.0029926140172679 0.6432194974194848 0.6286351306696210  
0.8338187399970927 0.3576755908598971 0.1330955814253973  
0.9983248414336989 0.8586526498018020 0.6306172323049671  
0.8342451863553940 0.8552586050341917 0.8827877727087723  
0.6715424630580545 0.3634756925239562 0.3654855980246152  
0.8370908668756503 0.6401953549214588 0.8837433344878397  
0.7033855252469110 0.0991886374969034 0.3217578565133539  
0.8388523512430753 0.0688233324235241 0.0604587230565097  
0.0029428445292100 0.5703140395640461 0.5634615466333019  
0.8345805119655306 0.4303260662488728 0.0684548521674968  
0.6799239972914269 0.9155512933864739 0.5502578862957320  
0.8354175661499154 0.9292039858474476 0.9452302790175631  
0.0019270177157261 0.4325820224242985 0.4432882863821589

0.8366204231822438 0.5677051988775662 0.9489895268087224  
0.6955194762851455 0.0384636953312576 0.4068990944577999  
0.7803998048017273 0.0349112541650253 0.0317358044029449  
0.9451881540087629 0.5341940289484631 0.5364090724219555  
0.8927246513514118 0.4638574906196059 0.0373237667285507  
0.7373158675926209 0.9565040385613267 0.5485058957957535  
0.7788052325794526 0.9665372837841211 0.9753371557247624  
0.9446784617187097 0.4668071601487931 0.4775495116203587  
0.8937215884506725 0.5312314585669071 0.9786027476032272  
0.7443911887085513 0.0185605965242189 0.4798311547978653  
0.8938490588443327 0.9632024551375181 0.9740077003331463  
0.7294829798818178 0.4654645457209196 0.4744780119495763  
0.7784942060176189 0.5341172865023208 0.9802099334113470  
0.9417172298376471 0.0342372604322815 0.4747465461612042  
0.8955160306116169 0.0314471577714855 0.0305861755873979  
0.7286890578145461 0.5313490515519966 0.5368421310650504  
0.7774658015069509 0.4667234969351066 0.0388286367044135  
0.9410675469243940 0.9666475965342023 0.5331447012832736  
0.9996280054915198 0.2270101986472108 0.1169406727348659  
0.1668983790297297 0.7323096060383990 0.6144787111374914  
0.3358940395191415 0.7403093088446870 0.8892256882082380  
0.1629609916715896 0.2780043325309375 0.3897164023289267  
0.0607385142988617 0.0594524749293937 0.0574782752402347  
0.1009694082987466 0.9405820749293127 0.5612288541722535  
0.2226265613367882 0.4449051256961895 0.4568928704509195  
0.2698156335997127 0.5655414824570565 0.9603457291304349  
0.2680516797384114 0.9455254449623098 0.9485783038707030  
0.1045991673680111 0.4434119336109135 0.4438081394395069  
0.0648989656268101 0.5622886357635560 0.9401210646590040  
0.2272600357778851 0.0618796927791783 0.4501610233664931  
0.2660478418693753 0.0652661813334914 0.0549757832310361  
0.1054790365644368 0.5630854581354857 0.5494455480431572  
0.0626495124013847 0.4415374888027724 0.0435397884000812  
0.2293457975587295 0.9414257217123430 0.5557676527731839  
0.2252306250030173 0.5657467539959378 0.5603054747691644  
0.0627380068321089 0.9399071428139133 0.9509237265394979  
0.2676422716617206 0.4450872837193502 0.0639607550203316  
0.1020342628146117 0.0611170503357038 0.4568527405885386  
0.3215039140194123 0.2838279378410742 0.1136514668101116  
0.5023798658201107 0.7563985391501055 0.5982797974181210  
0.6652202791251550 0.7695404414436010 0.8927239652333645  
0.5048868468097711 0.2583910931367609 0.3881995563714943  
0.3995703112856965 0.0644394474571838 0.0298335322880711  
0.4346277616057602 0.9430349274063468 0.5483384760671398  
0.5697531950572416 0.4453833659354302 0.4326002809325045  
0.5968372165190047 0.5659501762154262 0.9389552533450026  
0.6049151239863186 0.9318408895259983 0.9620479575140108  
0.4276195844560788 0.4471439430202395 0.4369048033378399  
0.3916297599335583 0.5677457464575215 0.9290535852882649  
0.6001377863958240 0.0130922643635382 0.3516362055905467  
0.6034250132275701 0.0505719430938586 0.0708149541773827  
0.43018350234559595 0.5683856918172506 0.5396705428149970  
0.3889186046464431 0.4456077952559281 0.0308918658559835  
0.5845526013427085 0.9073488599799684 0.4844705143261185  
0.5683501185405893 0.5617797004693207 0.5464819225891880  
0.4010223262243026 0.9442519547826018 0.9237330541319875  
0.5943795840625794 0.4429862577132133 0.0392010988965448  
0.4326208207704152 0.0628196899987851 0.4420616823426587  
0.6703586487547458 0.1814520559459003 0.1726523428536139  
0.8339268487124263 0.7655054016836608 0.6189967816125213  
0.0021018388110794 0.7365236529553274 0.8974221075903656  
0.8362833238355524 0.2221346823735398 0.390225662916750  
0.7360014644617153 0.0622915912115806 0.0560607418967791  
0.7762121531411341 0.9390104363828494 0.6022310673666181  
0.8994526757038706 0.4396470188754030 0.4571702374183451  
0.9391877560889028 0.5563645820832226 0.9546112155978269  
0.9382420904686237 0.9351012836480310 0.9511873579089491  
0.7746977189417158 0.4381303764322066 0.4544275157556463  
0.7338767421187192 0.5617386812238701 0.9574371550323039  
0.8968750578742307 0.0603074948640236 0.4496078278088633  
0.9413104992635313 0.0565490679452960 0.0527374628718301  
0.7733058220823383 0.5560576968785762 0.5658712650882061  
0.7320419155770295 0.4413021199507580 0.0624121975583305  
0.8956502523811546 0.9401962051340261 0.5541954257445243  
0.9003426187064251 0.5598776331788633 0.5624876122838782  
0.7329703873573017 0.9412288075373133 0.9538944855971820  
0.937315282225691 0.4361405264261986 0.0600728552276124  
0.7886602608495905 0.0509442288478997 0.4804744113818208  
0.5655777394195690 0.1734082109729985 0.5258283353327369  
0.6535570983628697 0.1985611440935399 0.4044629646233301  
0.4115356022491444 0.2532238895541278 0.2446245227288374  
0.5819467154095230 0.2630414889663995 0.2280711961521336

Structure 2 monomeric Fe S=5/2

1.0000000000000000  
20.9172000884999996 0.0000000000000000 0.0000000000000000  
0.0000000000000000 17.8076000213999990 0.0000000000000000  
0.0000000000000000 0.0000000000000000 12.2158002853000003  
Al O C H Fe  
11 62 96 62 1  
Direct  
0.4110088682482906 0.2538813715685797 0.2444365870373422

0.0827330453119825 0.2516723622477722 0.2534903663042405  
0.2501412054787049 0.7555624354514147 0.7501833742053589  
0.2470616553985106 0.2519128377681872 0.2496486891915501  
0.0840451715043061 0.7528915131816187 0.7534006499192023  
0.5848872137555051 0.7488761848578473 0.7489050636864303  
0.4168070832863410 0.7548894685737492 0.7425681171587181  
0.7544908048798905 0.2470118575099350 0.2516540193820338  
0.9181589015333225 0.7484182545375229 0.7566133579418836  
0.9185502528854382 0.2505550019352448 0.2548029587319547  
0.7522636196497708 0.7445532394798480 0.7608333174858134  
0.6698564381527642 0.2367703027862807 0.1908221697550519  
0.8353736235195708 0.7455994789417114 0.6930588970779358  
0.0014470045970403 0.7502341135618706 0.8205762421477132  
0.8362607013917128 0.2486288443779139 0.3203385134231139  
0.7862157675344383 0.1735872049643414 0.1448644667182030  
0.9486755267015590 0.6702004341689970 0.6553835324086958  
0.8876853579882136 0.3279314892048154 0.1561064776842178  
0.7262809553417672 0.8192755977547880 0.6562375885726460  
0.7795691269175518 0.8267611204084186 0.8594233128279588  
0.9475857988188502 0.3317985409690036 0.3521094016126894  
0.8912597954443742 0.6678928202719974 0.8566649993727370  
0.7312690775249693 0.1622583129536706 0.3525021748183332  
0.8883756314720749 0.8265461773114268 0.8578983775768994  
0.7211980010380867 0.3239866540037342 0.3562595970083789  
0.7825807773498489 0.6685996298186769 0.8601751844119133  
0.9458758804815615 0.1723792077034104 0.3582005096210111  
0.8944141666676755 0.1687821053997091 0.152827927077838  
0.7235397460205892 0.6639297100594267 0.6644285555608171  
0.7791489278946226 0.3306355200799485 0.1601927500807714  
0.9443653779396320 0.8295454492561674 0.6561854178053209  
0.3288705670061716 0.2530263905323630 0.1808889384538165  
0.5014775915356448 0.7517656772661777 0.6794702462839484  
0.6669987725340127 0.7472659635567159 0.8216669258217500  
0.4927582302331318 0.2616875901441277 0.3070466194100901  
0.4422335493425116 0.1728745429432858 0.1447075351154521  
0.6150264991060076 0.6679276857051546 0.6535986062151858  
0.5432472514479745 0.3317274972962218 0.1230418995290912  
0.3883943937099582 0.8340267454341076 0.6450451616671321  
0.4479999149261774 0.8327993474766262 0.8425343022757765  
0.6163718894867373 0.3478114319262232 0.3221309093204418  
0.5508997929291629 0.6721535643611585 0.8457383600267110  
0.3864179008597911 0.1747945151883454 0.3455524840570197  
0.5568048459430134 0.8308452772378706 0.8470659268895213  
0.3826082744821513 0.3349718780866802 0.3449448985776241  
0.4422046498742521 0.6755862895647851 0.8414356109288900  
0.6793203489195047 0.0878786359544192 0.2297297532205574  
0.5507461541836622 0.1679943384321911 0.1513067984348865  
0.3852770094414890 0.6758647826496347 0.6415077971074470  
0.4351029460114179 0.3334248025672784 0.1380765619122570  
0.6174589175090398 0.8236771569253385 0.6460293598299435  
0.0006592596047676 0.2511499823084243 0.1883886852716695  
0.1669209392735695 0.7540240312829668 0.686225904317570  
0.3338008047949556 0.7554800478812871 0.8115206856668991  
0.1654038759174642 0.2524690920772384 0.3177107146194312  
0.1094854629361712 0.1721594414480457 0.1534320981714806  
0.2765066384871342 0.6754872878359577 0.6477160686441593  
0.2201320979986298 0.3311255842186774 0.1477225343919308  
0.0529183218146496 0.8311343907395498 0.6556511735161464  
0.1126365324663932 0.8323986007060621 0.8517519134628927  
0.2740887257886155 0.3323340790565994 0.3508705034588359  
0.2226997529633630 0.6748788259946891 0.8537463681076854  
0.0544924233053841 0.1708942989024219 0.3556652219716349  
0.2212164190386613 0.8344990340754149 0.8494161180286106  
0.0560260719342633 0.3308963807626168 0.3528182636915587  
0.1138838919322570 0.6743596583631473 0.8544488469899522  
0.2780352034815284 0.1734248203035090 0.3471254914335775  
0.2178690260577130 0.1720844382951740 0.1533519315237187  
0.0573926647216555 0.6724254315290262 0.6522100328634801  
0.1115095572430822 0.3326448788926906 0.1506528377812311  
0.2797290978879575 0.8353375245223666 0.6502045308105180  
0.5750260396677552 0.2213943852922443 0.4890105102412409  
0.6039337022104372 0.1933802532917574 0.3879488772911037  
0.1638198429812468 0.1437495142751662 0.1280144935910985  
0.3305539265890225 0.6473599707171150 0.6198840910415173  
0.1656694329730462 0.3603543577877255 0.1245212410771977  
0.3337272147942055 0.8628940187414446 0.6226268080111381  
0.1666704897736827 0.8614925542136832 0.8762108657370237  
0.0017070076905420 0.3597018690808114 0.3778903404253491  
0.1684374490611155 0.6463354255119393 0.8789931338656786  
0.0002652156706048 0.1432386118452066 0.3818622809564453  
0.1642696540882678 0.0711415212607596 0.0629350150763534  
0.3294948151571048 0.5738993713384370 0.5555945619595881  
0.1663863048462603 0.4339407515215264 0.0608538432462916  
0.9983878021149460 0.9315968336326925 0.5656119000720510  
0.1659104544352211 0.9339240475813344 0.9422049892713845  
0.3286228896700350 0.4352970974905600 0.4370249816191250  
0.1679786134869224 0.5729346873238740 0.9432064157473753  
0.9996902656885586 0.0699409840812895 0.4463137186612462  
0.1071238466948987 0.0347830275293517 0.0332717016590768  
0.2718262165899687 0.5369111489603099 0.5303336153942411  
0.2241791283557744 0.4707558186110852 0.0360996761919176  
0.0562241904294783 0.9670091142080648 0.5369147355406029



0.1079056872382292 0.9675807458099914 0.9740222320111305  
0.2714226110765956 0.4691725438839313 0.472238195777434  
0.2249758668766589 0.5386781882567421 0.9785230613363499  
0.0568732786041157 0.0346385946296948 0.4785598071273562  
0.2230660829184510 0.9702005177196608 0.9721848101113597  
0.0598840820573837 0.4687239461242050 0.4702451005598403  
0.1101683266446340 0.5361447054489528 0.9681010632906019  
0.2755767119804520 0.0384307426189896 0.4693109227066811  
0.2222802222428172 0.0374136257624676 0.0313824865743729  
0.0603002315344660 0.5361009066256817 0.5291773542728931  
0.1093469403158191 0.4682166934187832 0.0256935291453552  
0.2758610636345480 0.9711781821232334 0.5284289155007141  
0.4959462165155075 0.1419102477271640 0.1233909899604747  
0.6695943886895513 0.6384894921466077 0.6326075281641750  
0.4881290806052934 0.3613610921635660 0.1064747637059774  
0.6735879782793354 0.8478003551672284 0.6234487617659704  
0.5022694162162398 0.8598034874485440 0.8702925059889480  
0.3284299436652349 0.3620590696719032 0.3728604143539540  
0.4956735272364538 0.6456156504081667 0.8674266779888679  
0.3324309494214392 0.1457725399943566 0.3717457784560743  
0.4970143579523275 0.0687710867013688 0.0592600118311842  
0.6704408967845804 0.5674465404387015 0.5638486340207355  
0.4885878951573790 0.4344395377166320 0.0444244971615242  
0.3335672271587307 0.9357513388089381 0.5575514383787967  
0.5011849823986094 0.9322158803833962 0.9367576432420858  
0.6715725205333091 0.4337770203128030 0.4359124762216657  
0.4929156014389184 0.5724175113436055 0.9296827500277836  
0.3330393276959257 0.0731470430056081 0.4369651786598143  
0.4408657355435776 0.0366221103806845 0.0166374660005448  
0.6132116633211909 0.5352965213652345 0.5258243744682357  
0.5474174564207895 0.4682030431292163 0.0179749908046810  
0.3910125615852323 0.9704484870912135 0.5252074257067306  
0.4430070926563877 0.9696974166126747 0.9567159017532850  
0.6138025186157556 0.4700125695899862 0.4625954414948988  
0.5495492904406345 0.5361891937993444 0.9616719573091632  
0.3907372277944207 0.0376800834450643 0.4658804688912765  
0.5572330575712005 0.9644630797594420 0.9798693887421013  
0.3862945930192575 0.4721311853161894 0.4623227670622398  
0.4340850204605234 0.5385947332471319 0.9556945042350800  
0.6378502154400687 0.9973377375419592 0.4088814663088296  
0.555247842917789 0.0311874565125580 0.0402821998629346  
0.3866617280638683 0.5398869002939409 0.5203564071479843  
0.4318534401236933 0.4706951287073081 0.0127890464497354  
0.6294783643555322 0.9379167123252099 0.4817511581837200  
0.8398723973754981 0.1425316703883446 0.1238570355594156  
0.0030428286936749 0.6431643892030704 0.6286520393488705  
0.8336713012395678 0.3574925546528042 0.1330399870874634  
0.9983898338684892 0.8586562371799153 0.6306607041292832  
0.8342332725442776 0.8552478689246339 0.8828519438329692  
0.6703644263105830 0.3632833681174761 0.3663356679781815  
0.8370502468535608 0.6401389235508391 0.8837671682011540  
0.7027216576487116 0.0993438851569600 0.3219723946079994  
0.8386382195032305 0.0689362057430601 0.0604880535605400  
0.0030350702726562 0.5702641374634351 0.5634454096437471  
0.8344502693720260 0.4302182591019426 0.06843973034774712  
0.6797025860977143 0.9154214349994639 0.5505707423492470  
0.8353674283050754 0.9292178600389598 0.9452245084410247  
0.002062620215994 0.4324639034116538 0.4431487677801361  
0.8365599302009104 0.5676568585118834 0.9490080963442354  
0.6952416371921505 0.0384817499569760 0.4070745285447004  
0.7802492599030304 0.0348998233270842 0.0316968470552395  
0.9453325026706511 0.5340691994638502 0.5362497018254525  
0.8925989162596278 0.4637773451355252 0.0373851568268493  
0.7370497870656176 0.9565107407861523 0.5488356619284989  
0.7787195195473573 0.9665106724124691 0.9752888553423038  
0.9449162205036130 0.4666692147320934 0.4773660710048037  
0.8936342285143530 0.5311603056033989 0.9786838775385702  
0.7440802460735771 0.0186182533488547 0.4801535628746599  
0.8937571218736309 0.9633050681257036 0.9740612361822715  
0.7288573638881302 0.4654902880854492 0.4744831931907998  
0.7784156866810067 0.5340966216982087 0.9802301700282656  
0.9419203785522005 0.0343127917478637 0.4745733055279588  
0.8953373182297453 0.0315778935249383 0.0306314130991096  
0.7282486846266597 0.5313824480132339 0.5369083894045422  
0.7773577054194868 0.4666846265140144 0.0388254775548782  
0.9411984056893161 0.9667069519319713 0.5329866127512003  
0.0004284697806558 0.2272328559111971 0.1168963116054967  
0.1667115570308902 0.7319540094611877 0.6134926808040440  
0.3354213890579562 0.7402649651264037 0.8878018938161802  
0.1658579673173300 0.2767492505117303 0.3889370084540616  
0.0617037282185427 0.0598449845202944 0.0576592985460825  
0.1010721676097468 0.9405802890686890 0.5613799562369280  
0.2262176664819458 0.4415248892135782 0.4532012635597015  
0.2703412046121294 0.5661614430380824 0.9601847731810952  
0.2684600710685703 0.9448764446616128 0.9482642112386519  
0.1048355226406466 0.4434439409866167 0.4439217946592581  
0.0654014836455215 0.5615571554184779 0.9410914507507253  
0.2304013207639726 0.0650328914424116 0.4470862056831054  
0.2670109303558318 0.0647800851568943 0.0542270769043015  
0.1055939842935806 0.5631130775149520 0.5494964127679272  
0.0639867462633537 0.4406995563368081 0.0441506778342517  
0.2308993800096337 0.9451580823230411 0.5531037159661413

0.2268732904568193 0.5618155808079902 0.5574177356959016  
0.0631306576366894 0.9402418739099014 0.9514387054322605  
0.2689580961421502 0.4454763164189539 0.0633041405007553  
0.1022260767859278 0.0610901588142706 0.4570406918495207  
0.3276702147877025 0.2796193181432872 0.1114553464822706  
0.5027724171903599 0.7565885144341313 0.6003684184788217  
0.6653463916267079 0.7699855376981715 0.8939222050665934  
0.4962781615422189 0.2563458080509330 0.3862798727502011  
0.3953103918398603 0.0648781156136751 0.0307762396264730  
0.4362637114594560 0.9440404653506125 0.5475819362105381  
0.5690866898946367 0.4459272592577886 0.4329851816171416  
0.5952675590105119 0.5620753110527896 0.9412905425508723  
0.6029432918890342 0.9366139710808077 0.9654830293283373  
0.4311926051041934 0.4469092564840975 0.4355724825027539  
0.3900665370649629 0.5662851028549393 0.9298615058912011  
0.6000849082893864 0.0126203972101315 0.3513915128288670  
0.5990951384176790 0.0546477947552515 0.0745195087248271  
0.4318358126896097 0.5675567289749959 0.5396620577602662  
0.3859955654035621 0.4450545065081803 0.0332449417232273  
0.5844750606350946 0.9069641673954540 0.4842052863087083  
0.5680575985130625 0.5623828085174916 0.5467484437070367  
0.3992077857052772 0.9453888266646422 0.9235728829150547  
0.5914241167991550 0.4400992081966161 0.0426583628242444  
0.4357286410386493 0.0634100605679532 0.4405487688439199  
0.6688058953570647 0.1822105053248380 0.1722867289313070  
0.8339148967118283 0.7654981596149489 0.6190704608208494  
0.0021641726274061 0.7365295077113397 0.8974874094247332  
0.8358939322445113 0.2223119511440147 0.3900411477453482  
0.7358153039365454 0.0622266136755917 0.0559661473720239  
0.7759754856770386 0.9391474722521448 0.6026125290747734  
0.8996707174706232 0.4395507126349230 0.4570086674930545  
0.9391211985330026 0.5562632475800345 0.9547484997334601  
0.9381965938471503 0.9352478480855819 0.9513269880522830  
0.7740179352653632 0.4380178635767920 0.4544387147779548  
0.7338070982262420 0.5617449042827553 0.9574670516575731  
0.8970674200939658 0.0603401517877774 0.4493828795285255  
0.9411203062185434 0.0567057580184557 0.0527784181515375  
0.7729822751717321 0.5558369081219173 0.5658953415782512  
0.7319048157208202 0.4413023386433373 0.0623480134275727  
0.8957439427210224 0.9402865104187231 0.5539228680623071  
0.9004583434206433 0.5597225257819242 0.5622842994825167  
0.7328958328158321 0.9411641501673556 0.9538507252897417  
0.9371847848599226 0.4360596013016689 0.0601331424431423  
0.7883393770484951 0.0510544758178334 0.4810402640857785  
0.5647492155609345 0.1736157940787764 0.5251195005081870  
0.6509620296344417 0.1989878354057568 0.4008492283680878  
0.5790594493557285 0.2620387264391659 0.2327789883790440

Structure TS1 S=5

1.0000000000000000  
20.9172000513517986 0.0000000000000000 0.0000000000000000  
0.0000000000000000 17.8076000124173000 0.0000000000000000  
0.0000000000000000 0.0000000000000000 12.2158001655443993

Al O C H Fe

10 62 96 62 2

Selective dynamics

Direct

0.0823446761000000 0.2504503549999981 0.2524134131000011 F F F  
0.2497841941999965 0.7530320740000036 0.7514314482000017 F F F  
0.2457811251999971 0.2503782606000016 0.2506516593999990 F F F  
0.0838624195000008 0.7517592072000028 0.7522273657000014 F F F  
0.5853262556999965 0.7490593396999969 0.7434730271999967 F F F  
0.4167605057999992 0.7535658620000021 0.7404123608000006 F F F  
0.7556788238999985 0.2488592784999994 0.2527821667000012 F F F  
0.9181130106000026 0.7485491553999992 0.7540314071000012 F F F  
0.9189289854000009 0.2506132716000025 0.2530308664999978 F F F  
0.7522781107999990 0.7449431936000011 0.7564604761999973 F F F  
0.6748639373999978 0.2469056146000028 0.1775866130999972 F F F  
0.8354183854999988 0.7460705072000025 0.6898237501999986 F F F  
0.0012400397000008 0.7497596811000022 0.8186759401000003 F F F  
0.8374706711000002 0.2490120598999965 0.3194097096999968 F F F  
0.7839590757999986 0.1704840276999988 0.1487419607000007 F F F  
0.9483722016000016 0.6699608831999981 0.6527861751999993 F F F  
0.8909200523999985 0.3291757459000024 0.1544119771999988 F F F  
0.7268911478999982 0.8209804294999969 0.6524173974000007 F F F  
0.7795548576999991 0.8266560384000030 0.8566459959000028 F F F  
0.9480893862999977 0.3309042902999977 0.3516492601999985 F F F  
0.8911208343999988 0.668695632999986 0.8539840225000006 F F F  
0.7317926098000029 0.1670617644999979 0.3539624531000030 F F F  
0.8883751794000005 0.8270879230000006 0.8552488266999987 F F F  
0.7247938188999967 0.3269894729000029 0.3527018318999993 F F F  
0.7824472842000034 0.6684042715999965 0.8561599782999991 F F F  
0.9455268780999972 0.1711651048999983 0.3555192715000004 F F F  
0.8924704096000013 0.1693545624999970 0.1500037324000019 F F F  
0.7235266120000006 0.6642724762999990 0.6593887288000033 F F F  
0.7826153938000004 0.3309546811000033 0.1583224367999989 F F F  
0.9447523796999988 0.8292397264999991 0.6542666540999988 F F F  
0.3262436393000030 0.2515976183999982 0.1798628493000010 F F F  
0.5013354921999991 0.7514003134999996 0.6749446379999995 F F F  
0.6675918616999965 0.7473066028000019 0.8169151056999979 F F F  
0.5041006907047811 0.2515601833865861 0.3081003861768016 T T T  
0.4458529878000022 0.1661365304000029 0.1410111086999990 F F F

0.6150105171999982 0.6679830628999994 0.6490611352000002 F F F  
0.5498077693000027 0.3388167940000031 0.1253265048000003 F F F  
0.3871219967000030 0.8313214738000028 0.6437016765000010 F F F  
0.4481912923000024 0.8310252193999972 0.8394824262000000 F F F  
0.6170207302999984 0.3349812092999969 0.3371357696999979 F F F  
0.5522059127999981 0.6735566416000012 0.8409533551999999 F F F  
0.3829410235000026 0.1688918138000020 0.3503193450000026 F F F  
0.5571338844000024 0.8292709704000032 0.8418852913999970 F F F  
0.3835110297999975 0.3343082972000033 0.3516177253000023 F F F  
0.4434057969999969 0.6758760823000003 0.8386194635000024 F F F  
0.6393679203448502 0.1226775242281751 0.2807313786665229 T T T  
0.5534741805999985 0.1751377340999980 0.1229013095000013 F F F  
0.3849573871999965 0.6745073363000031 0.6417895461000001 F F F  
0.4411534815999971 0.3354611787000010 0.1332568981000009 F F F  
0.6181027913999984 0.8240965673000034 0.6432009959999974 F F F  
0.0007018749999972 0.2498328180000016 0.1870418479999998 F F F  
0.1666460801000014 0.7518575523999971 0.6863852588000015 F F F  
0.3338327486000026 0.7537456983000013 0.8116487584999987 F F F  
0.1645319730999972 0.2512481140000025 0.3176785300000020 F F F  
0.1086005519999986 0.1704860955999976 0.1528152507000016 F F F  
0.2762079494000034 0.6731220675999978 0.6502003996999974 F F F  
0.2194628543999997 0.3309054942000031 0.1502750217999989 F F F  
0.0533114472000022 0.8305100311999993 0.6541426933000025 F F F  
0.1124848595000003 0.8310924263000032 0.8506289047000024 F F F  
0.2747488572000023 0.3300923027999971 0.3534793580000013 F F F  
0.2217921932999971 0.6733117009000011 0.8545664633999976 F F F  
0.0541186546999981 0.1706552181999967 0.3551810061999987 F F F  
0.2210640587000015 0.8324657604999999 0.8499014726000027 F F F  
0.0564371636999965 0.3303988126999968 0.3515136888999990 F F F  
0.1129428627999971 0.6727981185999994 0.8539337564999983 F F F  
0.2746451494000013 0.1703355634999966 0.3484381537000019 F F F  
0.2168665105999992 0.1708946943999976 0.1527668272999989 F F F  
0.0571013058000034 0.6717747954999993 0.6506199049999992 F F F  
0.1109144392000019 0.3307281542000027 0.1494334369999990 F F F  
0.2783971101999967 0.8312319333000033 0.6504455819000015 F F F  
0.5525763727387133 0.2591443165697750 0.5287537152299773 T T T  
0.5895147888674541 0.1900496960239483 0.5108238997224377 T T T  
0.1629615453000000 0.1422622477000033 0.1272631216999969 F F F  
0.3302750130999996 0.6456096184000018 0.6215223453000007 F F F  
0.1650114920999997 0.3593212176999998 0.1250785339999965 F F F  
0.3320201200999975 0.8593147097000013 0.6222522273999971 F F F  
0.1665293283000011 0.8598714483999998 0.8757044191000034 F F F  
0.0021403993999982 0.3591113849999985 0.3768666225000032 F F F  
0.1673888412000011 0.6448093599000018 0.8790882851000035 F F F  
0.9998902194000010 0.1425555810999981 0.3804325294999984 F F F  
0.1636090319999965 0.0696906665000014 0.0620095664000004 F F F  
0.3292614165000032 0.5723214088000006 0.5579498700000016 F F F  
0.1656022828000019 0.4327576833999984 0.0612796420999970 F F F  
0.9988105989000005 0.9312279289000003 0.5643030132000035 F F F  
0.1656968683000031 0.9324011578000011 0.9413699660000034 F F F  
0.3280784676000010 0.433888233999967 0.4407086689000010 F F F  
0.1669467038000008 0.5714979023000026 0.9433209482999985 F F F  
0.9995181219999978 0.0694449888000008 0.4450734398999998 F F F  
0.1065751511000030 0.0332857633000003 0.0317390708000005 F F F  
0.2714696868000033 0.5355118745999974 0.5334714532000007 F F F  
0.2233639298000014 0.4694493132999966 0.0360058228000000 F F F  
0.0565260723000023 0.9667162009999970 0.5351892182999975 F F F  
0.1075895943999967 0.9660701576000008 0.9725227188000005 F F F  
0.2708508318999989 0.4676806463000034 0.4757479913999987 F F F  
0.2240518489999985 0.5372589539000003 0.9781940302000010 F F F  
0.0568748573000022 0.0343307429000035 0.4768466367999977 F F F  
0.2227459492999984 0.9687103071999985 0.9718430320000024 F F F  
0.0600928328000023 0.4683325076000031 0.4689415269999984 F F F  
0.1091683837999966 0.5348512389999982 0.9687547270999985 F F F  
0.2713291648000009 0.0337181251000018 0.4714103160999983 F F F  
0.2217265825999988 0.0359639082000029 0.0309794870000033 F F F  
0.0602728239000001 0.5357619891999974 0.5276926224999983 F F F  
0.1084703805999965 0.4669922917000022 0.0264979359999984 F F F  
0.2724714407000022 0.9663217398000015 0.5299233368000031 F F F  
0.5000281768000008 0.1413909561999986 0.1090995984000003 F F F  
0.6695224567000011 0.6384349632999999 0.6284127106000028 F F F  
0.4936814451000018 0.3652993382999981 0.1049662145000028 F F F  
0.6739079310999969 0.8498952974000034 0.6216384641999966 F F F  
0.5026967988000024 0.8577337023000027 0.8661810922000015 F F F  
0.3285450507000007 0.3605150445999996 0.3771043663000029 F F F  
0.4972945935000013 0.6469729188000031 0.8641506051000007 F F F  
0.3281841180000029 0.1412209763999996 0.3747234337999998 F F F  
0.5010164541999984 0.0672375632000026 0.0489486848999974 F F F  
0.6700658991000026 0.5666288338999976 0.5612386491999999 F F F  
0.4934283755000024 0.4378547598999987 0.0422050361000004 F F F  
0.3307620140000012 0.9318792505000033 0.5578839219000002 F F F  
0.5024646844999978 0.9296431960000007 0.9321346577999989 F F F  
0.6711332594000012 0.4311843018999966 0.4371277089000003 F F F  
0.4956077761000017 0.5747224603999967 0.9273646372000002 F F F  
0.3285316962999971 0.0688725718000001 0.4393130389000035 F F F  
0.4437371017000018 0.0338966505999991 0.0133164646999973 F F F  
0.6127864795000022 0.5336476852999965 0.5247351669000011 F F F  
0.5518707103000011 0.4717926164000019 0.0142569879999996 F F F  
0.3879023758999978 0.9672150210000012 0.5259531100000032 F F F  
0.4444914828999984 0.9662598319999987 0.9556719365999982 F F F  
0.6132959019999973 0.4672270785999970 0.4637803719000004 F F F  
0.5529559782999982 0.5395451139999992 0.9576383662000012 F F F

0.3868462299000015 0.0345982074999966 0.4676367754000026 F F F  
0.5595979379000013 0.9623377240000011 0.9696140993999975 F F F  
0.3858741008000024 0.4706270511000028 0.4655362888000028 F F F  
0.4371507027000021 0.5407244762999994 0.9547564117000036 F F F  
0.6279009798999979 0.0110984104999972 0.4332731164000023 F F F  
0.5589603549000017 0.0300946496000023 0.0271871109000017 F F F  
0.3864703544999983 0.5384869749999979 0.5229032944999972 F F F  
0.4360143528000009 0.4729905132999974 0.0118936602000019 F F F  
0.6237226488999994 0.9476165694999992 0.4992588125000026 F F F  
0.8380527635000021 0.1413624340000013 0.1244912160999974 F F F  
0.0027458105999969 0.6427391989999975 0.6265488863000002 F F F  
0.8367150521999989 0.3583269900999966 0.1310844607999968 F F F  
0.9988905240999983 0.8582214774000008 0.6290598121000031 F F F  
0.8340807151000007 0.8552473786999997 0.8804229220000011 F F F  
0.6713597454999984 0.3593094633000007 0.3705346619000025 F F F  
0.8369705530000005 0.6404879696000023 0.8805412365000009 F F F  
0.6855412601580996 0.1180427218474802 0.345775555197866 T T T  
0.8371449525999992 0.0679230386000000 0.0608303781000004 F F F  
0.0028682937999989 0.5698535524999997 0.5614237436000025 F F F  
0.8368386702999970 0.4309068820000022 0.0660497289999995 F F F  
0.6780253975000008 0.9199394064999993 0.5533859602000035 F F F  
0.8348127725000012 0.9288757570000001 0.9438212562000032 F F F  
0.0025013298999994 0.4319880803999965 0.4416590034999999 F F F  
0.8371408313999993 0.5681230699999986 0.9460226750999965 F F F  
0.6858583750999969 0.0504061461000020 0.4216674409000021 F F F  
0.7790378278000034 0.0338841173999995 0.0304606233000015 F F F  
0.9452555678999985 0.5336014698999989 0.5339081281000020 F F F  
0.8945346527999973 0.4651969626999986 0.0343421072999988 F F F  
0.7360618379000030 0.9591051753999977 0.5421987790999978 F F F  
0.7779001305000008 0.9658877801999992 0.9731332097999967 F F F  
0.9450634136999980 0.4661181295999981 0.4752671493999969 F F F  
0.8946715679999997 0.5324746936000011 0.9753558398999971 F F F  
0.7397293993000034 0.0241573431000006 0.4784490748999985 F F F  
0.8929311385999981 0.9629208424999973 0.9741429314000030 F F F  
0.7284490142000024 0.4641025354000021 0.4735979757000024 F F F  
0.7794420096999986 0.5337865222000033 0.9777823080999966 F F F  
0.9418537765999986 0.0338706665000004 0.4739931554999970 F F F  
0.8940565887000034 0.0309127259999968 0.0314703008999970 F F F  
0.7278859445999970 0.5305888651000004 0.5345142767000013 F F F  
0.7792840903999974 0.4664784241999982 0.0366660310000029 F F F  
0.9414635971999985 0.9663012597999980 0.5324436062999993 F F F  
0.0004979420000026 0.2282977022999972 0.1140058574000022 F F F  
0.1667270107000007 0.7305376671999966 0.6131947893999978 F F F  
0.3360999101000033 0.7411792937000001 0.8888612021000029 F F F  
0.1643584816999990 0.2729328861000013 0.3906231208000008 F F F  
0.0610505197999984 0.0583271878000033 0.0555893601000008 F F F  
0.1014810786000027 0.9403782223999997 0.5592618288999986 F F F  
0.2255664835999980 0.4400760862000013 0.4571321844999972 F F F  
0.2693907115000016 0.5646319494000025 0.9592420707000002 F F F  
0.2682345198999982 0.9434183807000025 0.9483046295000008 F F F  
0.1051219889000023 0.4430818035000001 0.4429237113999989 F F F  
0.0643593197999976 0.5602985535999991 0.9420225570000014 F F F  
0.2259380421999992 0.0599977253000006 0.4497082095000025 F F F  
0.2663807806999969 0.0633644086999965 0.0541858606000005 F F F  
0.1054542676000025 0.5629114400000006 0.5483243023999975 F F F  
0.0631717553999991 0.4395003557999999 0.0454443452999982 F F F  
0.2279909295000024 0.9393322541000018 0.5549946235000007 F F F  
0.2267099784000024 0.5607696496999992 0.5608161190000018 F F F  
0.0629239387999974 0.9386803211000014 0.9493946791999974 F F F  
0.2681776056000018 0.4441111774000035 0.0629278915999976 F F F  
0.1020837191000012 0.0609420448000009 0.4548655273000008 F F F  
0.3255197821999971 0.2808200612999983 0.1125078235000032 F F F  
0.5021875767999973 0.7612967980999983 0.5968321798999980 F F F  
0.6657145184000015 0.7685856069999986 0.8900575075999981 F F F  
0.5091664695000020 0.2590663197999987 0.3874573260000034 F F F  
0.3986129102000007 0.0621402642999982 0.0309954911000005 F F F  
0.4333530756999977 0.9412294262999978 0.5479310874999967 F F F  
0.5685255364000028 0.4422178263000021 0.4360038924999969 F F F  
0.5981069437000031 0.5661998197999978 0.9356163209000030 F F F  
0.6047439612000005 0.9339930133999985 0.9525052194999972 F F F  
0.4306112901000034 0.4450480727999988 0.4387621337999974 F F F  
0.3928261486000011 0.5681635683000010 0.9300106610999990 F F F  
0.5862896376999984 0.0317339375000003 0.3887734720999987 F F F  
0.6033808819000015 0.0548626962999990 0.0569362625000025 F F F  
0.4316650570000036 0.5662764578000008 0.5415851224000008 F F F  
0.3907356269000033 0.4465096707999976 0.0336428199999972 F F F  
0.5784086720999966 0.9180239107000006 0.5088186026000017 F F F  
0.5676049806000023 0.5609076924000007 0.5451254414999980 F F F  
0.4000020755999998 0.9409299710999974 0.9272258219000022 F F F  
0.5962431845999987 0.4440645792999973 0.0377889150000001 F F F  
0.4314437136999985 0.0615730893999995 0.4431780658999988 F F F  
0.6724005362000014 0.1949227524999984 0.1511547841000009 F F F  
0.8341809572999992 0.7660999502000010 0.6158990631000023 F F F  
0.0017063210000003 0.7341902646000023 0.8948373485999994 F F F  
0.8371446880000022 0.2197179153999969 0.3865876192000002 F F F  
0.7343079485999979 0.0614223836999983 0.0527767650999991 F F F  
0.7781957227999996 0.9379709516000005 0.5849060659000003 F F F  
0.8999395780000015 0.4388348656000005 0.4545664326999983 F F F  
0.9397974167000029 0.5582091771999984 0.9508729894999988 F F F  
0.9375592622999989 0.9351028613999972 0.9519053062999987 F F F  
0.7736088280000004 0.4367219762999994 0.4533787857999982 F F F  
0.7344789802000022 0.5607428849000016 0.9552697463999991 F F F

0.8968636131999972 0.0598685969999977 0.4494471817000019 F F F  
0.9396193972999995 0.0561635028999987 0.0546481679999999 F F F  
0.7726349256999967 0.5555596386000019 0.5624914387000004 F F F  
0.7342094541999984 0.4404024211999982 0.0607172071999997 F F F  
0.8961466598000030 0.9398637620000017 0.5541168800999996 F F F  
0.9002905732000031 0.5592417451999978 0.5595043304000029 F F F  
0.7323023662999972 0.9406933254599993 0.9500249510000032 F F F  
0.9394795317000018 0.4381837617000031 0.0568189832000030 F F F  
0.7848280317000018 0.0545614473999976 0.4711859729999972 F F F  
0.5393467427730467 0.2514791866693509 0.6048406627529469 T T T  
0.6311417898462151 0.2115043042043238 0.4904826838195179 T T T  
0.4140024650999976 0.2489375916999990 0.2467988017999971 F F F  
0.5838609051489322 0.2603003854688209 0.2216174295462086 T T T

Structure TS1 monomeric Fe S=5/2

1.0000000000000000  
20.9172000491666985 0.0000000000000000 0.0000000000000000  
0.0000000000000000 17.8076000118889013 0.0000000000000000  
0.0000000000000000 0.0000000000000000 12.2158001585000004

Al O C H Fe

11 62 96 62 1

Selective dynamics

Direct

0.4128015756723400 0.2508986701264533 0.2445272069122382 F F F  
0.0836157524606449 0.2503526421896325 0.2515485057306108 F F F  
0.2503827353074328 0.7532010799673188 0.7479969523001770 F F F  
0.2483520382219098 0.2502532002579230 0.2487417065062871 F F F  
0.0842618509829123 0.7516870809908980 0.7512760313595379 F F F  
0.5847917215100153 0.7489495671514703 0.7482201780715556 F F F  
0.4168424533298491 0.7533765552291172 0.7412926937555255 F F F  
0.7545122158596129 0.2487386494169073 0.2536281732067422 F F F  
0.9182017805335505 0.7485596480879195 0.7541343545769124 F F F  
0.9189627517835817 0.2505080230399344 0.2530600958886353 F F F  
0.7520318905605450 0.7448503480412612 0.7579570035830443 F F F  
0.6724704412839912 0.2476530654789499 0.180617766542589 F F F  
0.8352405086008758 0.7460043965022365 0.6905912505841130 F F F  
0.0015431201883089 0.7497221509881129 0.8182994463328157 F F F  
0.8369501424753665 0.2490764483649741 0.3196801469235950 F F F  
0.7829420009687311 0.1708594037037301 0.1488423036730282 F F F  
0.9484527970789145 0.6698136956640397 0.6526385748484600 F F F  
0.8903240920444873 0.3288332553771127 0.1547215242840778 F F F  
0.7261317164150469 0.8207111000992597 0.6544523845457775 F F F  
0.7795347752540565 0.8264947397048559 0.8576214186931992 F F F  
0.9487552068003495 0.3306638982051595 0.3512357696784107 F F F  
0.8912362350226957 0.6685464149308515 0.8543141315144709 F F F  
0.7310437003242920 0.1667011763296154 0.3545593539802495 T T T  
0.8883626474442110 0.8273012722608186 0.8554594907653836 F F F  
0.7230170196460719 0.3271397703900050 0.3535458537424532 F F F  
0.7825486501153307 0.6684023685510354 0.8571378164197085 F F F  
0.9461042882627027 0.1712741897463559 0.3550059200837623 F F F  
0.8915699606872280 0.1695475404159836 0.1504304649640531 F F F  
0.7229474454556311 0.6642558394949134 0.6612015708620618 F F F  
0.7819164756595569 0.3308839956070599 0.1591645914776976 F F F  
0.9448809342300777 0.8293848178584255 0.6543274284246365 F F F  
0.3303443965132615 0.2513474048670190 0.1803700352965336 F F F  
0.5015634958866073 0.7513208202046755 0.6785086282039501 F F F  
0.6672060191780389 0.7472196660142387 0.8201186359223485 F F F  
0.4963812756175132 0.2535175467514771 0.3057780505938663 T T T  
0.4414640644217158 0.1705817244268033 0.1440871595262436 F F F  
0.6143961213552416 0.6679060840410642 0.6527668934157020 F F F  
0.5467529143376879 0.3369908464378142 0.1292565929492611 F F F  
0.3885427499998286 0.8317430846297640 0.6431938214426722 F F F  
0.4469704364914122 0.8312140807494828 0.8419311528269375 F F F  
0.6150476281488153 0.3348213543805301 0.3399341085687198 F F F  
0.5512585482644781 0.6724165305564256 0.8453721362201065 F F F  
0.3864866989281737 0.1723438883294790 0.3445467231349468 F F F  
0.5558157862241018 0.8299450392851284 0.8470902718616884 F F F  
0.3854126140130489 0.3321707350496581 0.3448210902467679 F F F  
0.4425504657322819 0.6749663449221117 0.8405152418073740 F F F  
0.6379693206065309 0.1224809289198328 0.2833123384916868 T T T  
0.5495054012920662 0.1750914910270609 0.1288178018328310 F F F  
0.3861588893015622 0.6738535728384250 0.6414546600360396 F F F  
0.4382507226923309 0.3320891726218775 0.1386558307275862 F F F  
0.6173069806539431 0.8245543371195723 0.6476339595602454 F F F  
0.0012706600505723 0.2497424515734821 0.1866998616004096 F F F  
0.1671472765977597 0.7518697467802866 0.6840651915201619 F F F  
0.3337559347465984 0.7536603354970310 0.8098118366025204 F F F  
0.1663558278775881 0.2508939494834976 0.3159310616451521 F F F  
0.1103729361519328 0.1703543608449323 0.1521902974246885 F F F  
0.2774003126845415 0.6726146578090848 0.6469318306467429 F F F  
0.2213177499696926 0.3303105740426204 0.1480297061551141 F F F  
0.0534564306276337 0.8304858451063239 0.653690935223290 F F F  
0.1132267947841612 0.8309309402780443 0.8494925132192321 F F F  
0.2767588402674264 0.3298428526349966 0.3509844018838706 F F F  
0.2224055713033835 0.6731435620374882 0.8518649263801308 F F F  
0.0547822336392940 0.1706471008830022 0.3543757467223898 F F F  
0.2217769904496052 0.8326994522720170 0.8468657960375623 F F F  
0.0572062123048980 0.3303737814181815 0.3505598366350213 F F F  
0.1135787522964122 0.6726246690251756 0.8525039754762034 F F F  
0.2780691747161086 0.1713020947657924 0.3463622101338188 F F F  
0.2187951149340037 0.1710026835060248 0.1507118747972456 F F F  
0.0571962357017526 0.6718653173836415 0.6498749098679610 F F F

0.1126403759407637 0.3305217058737924 0.1486717310639563 F F F  
0.2798438771672735 0.8323119745262204 0.6471341098443446 F F F  
0.5504051872701915 0.2581082261665579 0.5290347083612317 T T T  
0.5898392941783306 0.1968422587408125 0.4852224755966404 T T T  
0.1647255383060866 0.1422856216489734 0.1261275589177444 F F F  
0.3317002923407202 0.6448261249357188 0.6197421800406389 F F F  
0.1667720130692558 0.3589145807052248 0.1237848538442492 F F F  
0.3338176925756429 0.8603379379587466 0.6203227564365363 F F F  
0.1673457159620071 0.8598535612696736 0.8738357041529028 F F F  
0.0028740936279448 0.3589130928322106 0.3761608642774235 F F F  
0.1681456703507180 0.6446698879861259 0.8772294376175225 F F F  
0.0005239610740659 0.1426774195646914 0.3798104235520725 F F F  
0.1651143273504587 0.0695437138822967 0.0610155751895860 F F F  
0.3313792939454032 0.5711661109230803 0.5561578898260180 F F F  
0.1671246636929382 0.4325626541494074 0.0601737247852867 F F F  
0.9990435611916695 0.9313718645202371 0.5641620208476468 F F F  
0.1667329797752757 0.9322453495132876 0.9399901563683741 F F F  
0.3312419995354432 0.4324224374968892 0.4378117791745808 F F F  
0.1679374286217623 0.5714263047221380 0.9419293823321624 F F F  
0.0000522717770082 0.0695965248372801 0.4446872942282312 F F F  
0.1079741327326786 0.0332446562254631 0.0309718904331291 F F F  
0.2739391084162435 0.5337299763875905 0.5311055235799813 F F F  
0.2247264499677328 0.4694824584970618 0.0344922138692212 F F F  
0.0568286533152218 0.9665918774459499 0.5346789004332564 F F F  
0.1087609351070498 0.9660533393333992 0.9716227645515261 F F F  
0.2738693389901883 0.4659574521345107 0.4730970261801417 F F F  
0.2251515931253607 0.5373001183255894 0.9766016013689551 F F F  
0.0573272677548076 0.0341843296481841 0.4762358386707746 F F F  
0.2238835114550923 0.9683624216029756 0.9704408351868494 F F F  
0.0605982505660805 0.4683560338385391 0.4685526843138703 F F F  
0.1103070420158971 0.5346380186437685 0.9680086866319400 F F F  
0.2756942060781853 0.0365179925770249 0.4690335297448343 F F F  
0.2230847865882524 0.0355637867932543 0.0297515457520561 F F F  
0.0605824009442131 0.5357891653125648 0.5273483722623453 F F F  
0.1098746681311766 0.4667833449722920 0.0258498192539633 F F F  
0.2759250039256500 0.9690468411205302 0.5276132120553498 F F F  
0.4951280649709133 0.1435373963229978 0.1134762638449160 F F F  
0.6687723162087025 0.6384959996406465 0.6308314483362736 F F F  
0.4905196491356847 0.3628163107270126 0.1093427187048093 F F F  
0.6730593196338575 0.8499529386615308 0.6246915883091333 F F F  
0.5010959310551542 0.8584475366969784 0.8698414307896059 F F F  
0.3311542847879778 0.3592837927347503 0.3730613117613899 F F F  
0.4961152206474679 0.6457140528943839 0.8672441588219044 F F F  
0.3325291975756173 0.1435762489037913 0.3710499123816220 F F F  
0.4960561435152187 0.0691791995194322 0.0529410899580895 F F F  
0.6690566722936140 0.5669353484524464 0.5628606421793592 F F F  
0.4900005753560421 0.4354539726707856 0.0460011721742504 F F F  
0.3336410949764641 0.9333837596428651 0.5559771674841372 F F F  
0.4997056937727180 0.9309466016457648 0.9354709272267954 F F F  
0.6696770058176185 0.43164714366112863 0.4380421379079493 F F F  
0.4936213087935357 0.5729795237280584 0.9303570566013093 F F F  
0.3331611879014531 0.0711237764389736 0.4365526951513701 F F F  
0.4394551760659411 0.0348191243855425 0.0161033665427368 F F F  
0.6116620632897920 0.5339410469809067 0.5268660925085911 F F F  
0.5486599438562578 0.4691973077882992 0.0182389283575120 F F F  
0.3911036547375701 0.9681906398386104 0.5239231955804016 F F F  
0.4413181700607822 0.9670762490015150 0.9582992295042985 F F F  
0.6119456359134148 0.4676151039313723 0.4656372576592318 F F F  
0.5504684195283218 0.5369751405947909 0.9615138755470554 F F F  
0.3909178831876829 0.0356794153007485 0.4652909761583572 F F F  
0.5561518618015100 0.9647612361181004 0.9739725929437242 F F F  
0.3887116070773686 0.4696577111867910 0.4633920589641747 F F F  
0.4349407145939921 0.5391647857503870 0.9573460802589011 F F F  
0.6268416106588646 0.0115712926479787 0.4369559239144252 F F F  
0.5543943495927834 0.0325198742007871 0.0316604441822079 F F F  
0.3887721908404203 0.5374983987601283 0.5212513012231312 F F F  
0.4330598385629898 0.4713642092214343 0.0147404918475402 F F F  
0.6226485469011891 0.9482207309496999 0.5032113928745545 F F F  
0.8371191088517662 0.1417328837737344 0.1247378289799528 F F F  
0.0028335031351148 0.6426912267999185 0.6261246218800665 F F F  
0.8360817225938106 0.3580190642788565 0.1316011011578126 F F F  
0.9990228977507272 0.8583045796551616 0.6288997647709422 F F F  
0.8340574869547126 0.8553281030742994 0.8808751719974310 F F F  
0.6696384120442147 0.3595458064250892 0.3718793964800398 F F F  
0.8371034786792464 0.6403539124352307 0.8810529701109502 F F F  
0.6845736797611708 0.1177590845089050 0.3473566321491307 T T T  
0.8363730274912626 0.0683018812727383 0.0609038874447450 F F F  
0.0030927067402118 0.5697510307054472 0.5610112587918366 F F F  
0.8363698401030604 0.4305480229479315 0.0663101638445838 F F F  
0.6771677503384339 0.9198476320527504 0.5559730802816887 F F F  
0.8345773417872877 0.9291101251068952 0.9440027337016730 F F F  
0.0031141424179921 0.4318224965383664 0.4410940557875236 F F F  
0.8371460097987580 0.5678450950936238 0.9462820465473385 F F F  
0.6850273814522794 0.0501553568216124 0.4234867045376660 F F F  
0.7784114815863745 0.0340645982036989 0.0301859364627362 F F F  
0.9455934073361760 0.5332838619413351 0.5333876145514296 F F F  
0.8941742083657331 0.4646263775322907 0.0346098116698954 F F F  
0.7354606612630121 0.9582159594303690 0.5428082254576765 F F F  
0.7775334586641023 0.9660149412368852 0.9729396694261396 F F F  
0.9455951761460994 0.4658036155443668 0.4746987232793884 F F F  
0.8945483927873497 0.5319245665309964 0.9756429294754341 F F F  
0.7391824247395888 0.0231153763760830 0.4786342289659586 F F F

0.8925512621994827 0.9633958026583471 0.9745420209799676 F F F  
0.7271268416493868 0.4646656153412252 0.4737685082056089 F F F  
0.7793382688515820 0.5336621520308213 0.9778789178800196 F F F  
0.9423194700580595 0.0343155458663276 0.4740600094794942 F F F  
0.8934134190916154 0.0314294146131857 0.0318103486357444 F F F  
0.7267761370260288 0.5310313632707562 0.5350129862875050 F F F  
0.7789434643950059 0.4663356333908837 0.0367413347858445 F F F  
0.9417803092836365 0.9667700252095202 0.5326033209656345 F F F  
0.0009577293116649 0.2296854030188840 0.1127735559809437 F F F  
0.1667191469152911 0.7303567645105105 0.6109802872393146 F F F  
0.3352065959719965 0.7418674467453101 0.8873395608755033 F F F  
0.1665898523045826 0.2715164355172277 0.3895320378148170 F F F  
0.0625171784431942 0.0583607461399609 0.0550524995495323 F F F  
0.1017499903433361 0.9400597928208114 0.5584992317910817 F F F  
0.2287158047092319 0.4381482415231872 0.4542061185448176 F F F  
0.2704107476411295 0.5647677222942562 0.9573832809313387 F F F  
0.2692985949461786 0.9429670557443046 0.9467262135119014 F F F  
0.1057256252717664 0.4432671754884652 0.4426774090212220 F F F  
0.0653490805670529 0.5599296504848894 0.9416819575917401 F F F  
0.2305363813224162 0.0633545992365256 0.4473565515866866 F F F  
0.2678357055026339 0.0627462093929552 0.0529431562698974 F F F  
0.1057091227845177 0.5630357564238935 0.5480767682610121 F F F  
0.0646412383153105 0.4392666587885330 0.0451888066469621 F F F  
0.2309676100486300 0.9429863395261009 0.5523294078050611 F F F  
0.2288884462698633 0.5584449838708423 0.5581390753178326 F F F  
0.0639822779402763 0.9388251900793989 0.9487105578949908 F F F  
0.2696456031218091 0.4442706306774440 0.0611514245240912 F F F  
0.1026256812728690 0.0604928074214826 0.4539992638406360 F F F  
0.3291966544828426 0.2750200094908237 0.1087497524869363 F F F  
0.5031053118992688 0.7619892903515790 0.6006335437905932 F F F  
0.6660047024922591 0.7686028961391571 0.8932530576437046 F F F  
0.5001889565761076 0.2576528668793009 0.3855865668123604 T T T  
0.3938060204821952 0.0621768171503376 0.0329146373680729 F F F  
0.4363412087120082 0.9416538751764634 0.5458815205717897 F F F  
0.5670523778955427 0.4425127546868239 0.4386506662000826 F F F  
0.5960120309766523 0.5629812315938381 0.9401826945247507 F F F  
0.6018124493259975 0.9373034622708332 0.9577349173270520 F F F  
0.4337548603705699 0.4446437616150263 0.4368795335023634 F F F  
0.3907816808378826 0.5668147433088961 0.9321979958369937 F F F  
0.5850002506629792 0.0327841109428135 0.3936754364741617 F F F  
0.5984871401732974 0.0577268030153348 0.0620386751343460 F F F  
0.4338612636851309 0.5654357735267013 0.5402664834870450 F F F  
0.3873594558983697 0.4456242556623309 0.0358666855788599 F F F  
0.5770990593858727 0.9193450762967430 0.5141456426390434 F F F  
0.5665261555276899 0.5610336821226412 0.5480105800508284 F F F  
0.3971563194923391 0.9412651802186147 0.9292453216947933 F F F  
0.5928733978780230 0.4412680124471464 0.0421335506718421 F F F  
0.4359650699976143 0.0616614807312885 0.4408148087653316 F F F  
0.6706006363572072 0.1973995367984855 0.1480949435868055 F F F  
0.8338238139537424 0.7652472404052943 0.6162344928809631 F F F  
0.0021844966049258 0.7336767196759126 0.8942568016117960 F F F  
0.8367177946692976 0.2201471620274162 0.3872090628500473 F F F  
0.7335588520205008 0.0614502934794317 0.0521988431332829 F F F  
0.7778162259271681 0.9366136154260616 0.5843618784863196 F F F  
0.9005276207950885 0.4384053979962133 0.4539533160444194 F F F  
0.9397795855388225 0.5574562756324397 0.9512639799015332 F F F  
0.9372934418488086 0.9357212361096856 0.9525792778525997 F F F  
0.7722406133743362 0.4374140274249001 0.4528698311807418 F F F  
0.7344592090582012 0.5607763173077345 0.9552802896344303 F F F  
0.8973684108027555 0.0605355834588579 0.4497991708136198 F F F  
0.9388906505334660 0.0568034562794821 0.0551963699157341 F F F  
0.7716564771120034 0.5559544711679365 0.5624638416929955 F F F  
0.7337614369348557 0.4404495544977962 0.0606481008110862 F F F  
0.8963937773758985 0.9406080121812224 0.5545782208878123 F F F  
0.9005381961237759 0.5587384690417778 0.5589265735450155 F F F  
0.7320212716842107 0.9406877181493343 0.9496281245173108 F F F  
0.9390435176885816 0.4374522618136467 0.0571217281947440 F F F  
0.7845494918637286 0.0527955763274903 0.4699557895972291 F F F  
0.5402636343407613 0.2375401506348342 0.6013957878355614 T T T  
0.6309128545688967 0.2228022743595999 0.4752480709913559 T T T  
0.5805849864147645 0.2588917890773723 0.2274936659286600 T T T

Structure 2b S=5

1.0000000000000000  
20.9172000000000011 0.0000000000000000 0.0000000000000000  
0.0000000000000000 17.8076000000000008 0.0000000000000000  
0.0000000000000000 0.0000000000000000 12.2157999999999998  
Al O C H Fe  
10 62 96 62 2  
Direct  
0.0797770971688744 0.2505013832412282 0.2528241294109623  
0.2487838287766794 0.7518860701899444 0.7567675382401552  
0.2399397131715274 0.2483427404763791 0.2527304023418520  
0.082858961509585 0.7512838495391411 0.7524878128486323  
0.5840270689507447 0.7468748707790075 0.7493960717807324  
0.4159018244838807 0.7476373461216466 0.7486135802750876  
0.7599744324637520 0.2507459502130861 0.2512274729879791  
0.9173011301745946 0.7499418451009735 0.7535924344411242  
0.9197432079256234 0.2519003650354835 0.2538957277135188  
0.7513440462362330 0.7479091781234374 0.7578998481964344  
0.6794919068089904 0.2530533292855752 0.1780074715567529  
0.8342502408374186 0.7487657975409033 0.6905826656538147

1.0000910365073492 0.7509484395643308 0.8180520147520121  
0.8395456596367926 0.2514132603740933 0.3194761949521447  
0.7853530703495650 0.1688938428580342 0.1550671768363077  
0.9466526422533763 0.6710162557969278 0.6528377097175484  
0.8926903726505101 0.3319672809724553 0.1545492271890354  
0.7241577222815690 0.8247682132991825 0.6564056515126804  
0.7795216309401071 0.8282550571188213 0.8582540874997386  
0.9472704404105249 0.3319910451798406 0.3524229823348339  
0.8900025867552843 0.6706793950054307 0.8537157591211272  
0.7355146074433974 0.1720560198797128 0.3599759697647212  
0.8883314403356550 0.8283544692866752 0.8555049961173077  
0.7339315254080790 0.3338266428074891 0.3492132081028606  
0.7813081560926441 0.6703463799369703 0.8570132088795932  
0.9441624064397555 0.1717955886318493 0.3573550135598756  
0.8936652701835173 0.1708025733251593 0.1501498280180978  
0.7235941062284899 0.6687106923798465 0.6587621112156403  
0.7847785178418163 0.3291008285913869 0.1498603427389460  
0.9443909588274785 0.8295570450569382 0.6531495206916799  
0.3156808085290366 0.2488865919540409 0.1666832488942493  
0.5000874424513106 0.7475296143335975 0.6823102373615330  
0.6668730796810666 0.7475294523036429 0.8194600379751229  
0.4345100193113496 0.2736957194860406 0.3775493497236202  
0.4461904552060038 0.1667753665351503 0.1364432893475715  
0.6149544079668754 0.6690512992932279 0.6506065656135177  
0.5600716750880235 0.3335847300622672 0.1653607007160449  
0.3865205191771849 0.8282562650255614 0.6485391105617038  
0.4460130301325603 0.8247150396898222 0.8490341954540754  
0.6268495712584721 0.3232605581630625 0.3674945566978796  
0.5540612021878714 0.6674868175420229 0.8465872144821840  
0.3743313309095898 0.1506157267902107 0.3137358058745458  
0.5548681618311754 0.8251151298925296 0.8486270205412279  
0.3621619510181087 0.3672695373437544 0.2894116546587810  
0.4453617319708872 0.6659192248285252 0.8456397453002837  
0.6374263703640097 0.1372124136581771 0.3034291437059522  
0.5547008707027017 0.1670790267890296 0.1388028591976510  
0.3834649916276686 0.6710585184765693 0.6488752000731882  
0.4527440787616602 0.3238391376210006 0.1429850906286378  
0.6153648528618574 0.8272542760245520 0.6495864340452251  
0.9993756068633280 0.2502283875188127 0.1869381210833864  
0.1658427853559421 0.7523309395156346 0.6893387661620798  
0.3332749807073037 0.7495096389405249 0.8185316016688339  
0.1600417377225007 0.2497616360570130 0.3192466625693919  
0.1036474463417442 0.1702680268640397 0.1512429381484236  
0.2747331546223324 0.6739244521881477 0.6563534782460688  
0.2142738819182796 0.3289858369664718 0.1483350538492385  
0.0530826862024697 0.8302528031888823 0.6527714214728976  
0.1111686656005142 0.8298312227720446 0.8523095232108618  
0.2652154893156723 0.3311476135208194 0.3525480987467532  
0.21928054444191911 0.6725800077354499 0.8572206800019658  
0.0524861275845715 0.1704764599794356 0.3554106842729665  
0.2198881640999000 0.8306111049747367 0.8559601028781465  
0.0552951423453410 0.3307309271761047 0.3534552289590479  
0.1105306761362335 0.6721717543863868 0.8534728420082950  
0.2699295458477309 0.1700493221638884 0.3516405220569204  
0.2115320459427179 0.1677272199585542 0.1570944058115668  
0.0553429125344703 0.6722757998190940 0.6512411694441499  
0.1061946213013606 0.3314236101768612 0.1507850658826465  
0.2778146779788114 0.8299143130209820 0.6567500703410749  
0.5405192011291109 0.2178294419523912 0.3584502118543486  
0.5694952698920768 0.2105072246901818 0.4655862128601118  
0.1578579434583708 0.1405356269075006 0.1283947941665406  
0.3279070589526384 0.6452124184377352 0.6262871340004750  
0.1603643666877179 0.3590477017458008 0.1247504212584761  
0.3316739537551071 0.8566420672213393 0.6262206713316518  
0.1650173347308126 0.8583775531245538 0.8790574982296813  
0.0013029093838950 0.3600273288426939 0.3783054621217929  
0.1647005616385369 0.6441599265649584 0.8800905979184913  
0.9984399892108780 0.1425949454197427 0.3814400113903529  
0.1591004611019619 0.0682495353515981 0.0631140202586897  
0.3238636987432106 0.5749520953244824 0.5573715006480175  
0.1614831598096153 0.4324901870413712 0.0615635096458346  
0.9984543052308751 0.9310721839521661 0.5633837814830995  
0.1632795890749700 0.9310799496991470 0.9435862166855111  
0.3155526327734073 0.4437326280957999 0.4255701672520638  
0.1637123197205247 0.5710020037058974 0.9441368996067897  
0.9983609475027527 0.0694284748841839 0.4454130321975305  
0.1025849378299413 0.0326443035073819 0.0286986775579066  
0.2652105668824890 0.5377128125588793 0.5419663419352213  
0.2195511383945275 0.4683660494740362 0.0359650718657775  
0.0559915925965846 0.9654874976403867 0.5309275351389638  
0.1046384960465074 0.9653506846787950 0.9699392891887012  
0.2612537276644087 0.4726230718358164 0.4782653852055772  
0.2206803261630635 0.5361992653457605 0.9783355845147759  
0.0559545113396989 0.0332647959956690 0.4730933198512552  
0.2198183696564116 0.9668586948364165 0.9776447816576438  
0.0589776894392504 0.4692111895639903 0.4704510891754668  
0.1056229124942324 0.5352477189790211 0.9699696341020640  
0.2678065286508531 0.0298814513791556 0.4742122634260436  
0.2177719749051862 0.0341559907130604 0.0363610821101044  
0.0588850836668578 0.5367568247460370 0.5288497328631558  
0.1045033841146551 0.4674196345457049 0.0276162867332582  
0.2706660695748622 0.9638993208472011 0.5362803545257834



0.5010889839905168 0.1386545849380509 0.1134495179907343  
0.6699668132775910 0.6411272664234318 0.6292247224054519  
0.5068738340659416 0.3566409506913769 0.1279793139889506  
0.6707831115718050 0.8537566715295167 0.6275563305256491  
0.5003593909298160 0.8532609779974460 0.8731398737872347  
0.3138435204169053 0.3756638256850133 0.3505546281290680  
0.4999332065938633 0.6386557879699554 0.8715676566881062  
0.3221866749519536 0.1327829707339976 0.3604717593897370  
0.5005068626956448 0.0651136130942826 0.0507033894661560  
0.6722414811454684 0.5689694849584818 0.5633015737325381  
0.5051208466661862 0.4293645455318599 0.0611237925396020  
0.3293081137463208 0.9278120300245086 0.5575838710760699  
0.5002898885403723 0.9264164751331586 0.9359620433728985  
0.6775455359871502 0.4315774052694945 0.4445114915566698  
0.5013103070626985 0.5661767806630331 0.9378867078689515  
0.3235367397236738 0.0619765824864479 0.4300292062189007  
0.4427204955869542 0.0311507280587392 0.0186843889115082  
0.6159597307345452 0.5320214190553029 0.5308300375256649  
0.5615635571030093 0.4667654618373970 0.0302087878270205  
0.3850309946956350 0.9603106163187136 0.5139559488532522  
0.4426591540301014 0.9629281375225822 0.9622335495203592  
0.6186071701326702 0.4644937946951403 0.4726876351014714  
0.5597384309642214 0.5334826783982123 0.9697415425023934  
0.3821433641594995 0.02576173783333578 0.4509828375118211  
0.5579720255043713 0.9605110034339610 0.9680787984094963  
0.3740779562540455 0.4813989443832480 0.4409516690019313  
0.4448059650996772 0.5289577576462496 0.9690089337114017  
0.6253715286630098 0.0267600308213046 0.4580281716323831  
0.5580961290156581 0.0286286264625272 0.0246517050474349  
0.3785121842516784 0.5451082317223191 0.5067840047523823  
0.4466804226900389 0.4620533466855310 0.0292070747568525  
0.6203759301068961 0.9617962487568238 0.5213246556282410  
0.8394457059594478 0.1411481471580827 0.1278452590120640  
0.0010344267880393 0.6435552225530017 0.6268191857345187  
0.8387796717006717 0.3593268209282838 0.1271122164378049  
0.9986848482549670 0.8581221856744894 0.6279282617966732  
0.8342004121130461 0.8564697441885988 0.8818072085983987  
0.6800062175313804 0.3579442581248076 0.3823711213605145  
0.8359989278692367 0.6425046242573657 0.8805063113140406  
0.6874739356350281 0.1273726305647836 0.3612626507954176  
0.8383769076577623 0.0678076030753480 0.0644454412798566  
0.0012787026058850 0.5707987526873642 0.5616696617470056  
0.8380723261051962 0.4322153979234092 0.0635105766469768  
0.6752758349009842 0.9253819984986110 0.5608448919345890  
0.8353354740281903 0.9295215675082716 0.9463327654217164  
0.0014939007745060 0.4328883968772468 0.4426693235757089  
0.8367953470726829 0.5699518528874875 0.9454160637118294  
0.6854193787712484 0.0583463001656292 0.4330467086790810  
0.7800296976882578 0.0345540450396890 0.0335976696842408  
0.9437753292989045 0.5346074984726024 0.5334920191944937  
0.8954158649890759 0.4680818665626225 0.033772274768290  
0.7352287290618825 0.9575137281603410 0.5370590817292747  
0.7785703067384737 0.9668199115134795 0.9756873867117993  
0.9438709633252588 0.4670555413273649 0.4751348817330079  
0.8947600249744754 0.5356488541013706 0.9756030098297651  
0.7403229665518983 0.0231140363749173 0.4747693104492677  
0.8936561899328381 0.9627489810176199 0.9773925548986201  
0.7338489918310150 0.4690101139309850 0.4759698392172210  
0.7794648949311198 0.5342986303481062 0.9756797842989097  
0.9408809039798850 0.0349387378246664 0.4777088547401325  
0.8951418815026495 0.0304419244174780 0.0353613601989973  
0.7311850451594164 0.5363184203493009 0.5346157127549658  
0.7801355587370622 0.4666968799211789 0.0336663943873423  
0.9408767039419600 0.9671878049307925 0.5355498865957764  
0.9993180318860093 0.2237023443654166 0.1174535136531142  
0.1670688337239588 0.7417558531417969 0.6114352415320963  
0.3351841032026397 0.7540715674032109 0.8976272816130834  
0.1602872794761258 0.2733415493173125 0.3909316890220965  
0.0567360506484190 0.0583690222483333 0.0488461009107740  
0.1010689889824536 0.9382254143751655 0.5519438618751161  
0.2155800573058052 0.4439155370650257 0.4678139439776932  
0.2661493450604243 0.5631259587897062 0.9588964595088229  
0.2656531694927242 0.9411761411612679 0.9572275308063076  
0.1040756892441933 0.4438525013010855 0.4450579028899003  
0.0610550549240580 0.5614555681083769 0.9436252424597686  
0.2219480411055933 0.0572305384268121 0.4590905618272200  
0.2619234081740345 0.0613918891039035 0.0625435245606002  
0.1039253343829716 0.5640797751942587 0.5498634446236960  
0.0590897073508496 0.4403922720271035 0.04711105759859430  
0.2270193589365911 0.9394206643852637 0.5697428862314311  
0.2225897835220413 0.5604817595482073 0.5812870250281206  
0.0604873091241225 0.9383642588353156 0.9432583912892820  
0.2642645872609063 0.4425604740772153 0.0624345341468879  
0.1009505901399754 0.0592051960755300 0.4483264762717586  
0.3100881273583185 0.2899774745214778 0.1145879590377478  
0.5000710464317132 0.7593352935693597 0.6047152144235088  
0.6649139735825417 0.7598906350858720 0.8967825221306809  
0.4325410296974519 0.3286425832487039 0.3760956870443443  
0.3977344434484163 0.0589452174091825 0.0387754261118999  
0.4310103698847709 0.9335390581220826 0.5300511200586976  
0.5745353219858759 0.4364538013286389 0.4480151570364589  
0.6041328895032781 0.5613261218190494 0.9461922133944681

0.6029251848818974 0.9328192144635773 0.9476226115754424  
0.4165174479516376 0.4605047596101281 0.3989240954845132  
0.3989300351202733 0.5531626158208363 0.9451368030755363  
0.5825111667118583 0.0545046008763141 0.4274459534941769  
0.6029614228840431 0.0546626582344814 0.0498201142288440  
0.4243749255568649 0.5731197950385074 0.5188280984550336  
0.4022151689022309 0.4345140744688782 0.0530383629996169  
0.5734934767887578 0.9384712822099355 0.5407690941465126  
0.5699434402293596 0.5567966992413643 0.5524640611260864  
0.3976587526051881 0.9371180563197978 0.9371726232276063  
0.6074708973512817 0.4428514714535717 0.0544265837959570  
0.4257589645778947 0.0500126069044617 0.4171100852794838  
0.6759664067496268 0.2925722003224900 0.1232495764479623  
0.8331134878731913 0.7615723837480597 0.6133949626562928  
0.0003848884709907 0.7478319336752245 0.8973322719265608  
0.8391828459146228 0.2253667999987731 0.3893592191690947  
0.7355683321360347 0.0628267733506973 0.0556448436956095  
0.7780859730176171 0.9300410962878016 0.5683819198624798  
0.8989186911261099 0.4396659527875141 0.4537173556496542  
0.9395306319601060 0.5627571411923629 0.9524226509495664  
0.9381283546978828 0.9346221488409194 0.9551137745332404  
0.7798608718804133 0.4443388369760945 0.4541125787295405  
0.7342127824595452 0.5603680468000891 0.9526916458316578  
0.8958356551858611 0.0621725218772993 0.4565787454445717  
0.9408078038284765 0.0551276860809080 0.0592012295162101  
0.7750993165497984 0.5646064104196944 0.5595738396708804  
0.7352709726080342 0.4398533966226049 0.0568969883076371  
0.8958286246822251 0.9414294943233121 0.5603440944170869  
0.8987140634795191 0.5603083391362975 0.5584056281398638  
0.7328955726837841 0.9420961970148114 0.9519510532751936  
0.9406299735161263 0.4420607117967134 0.0571171174907754  
0.7872427495629971 0.0469325618692119 0.4569324020248996  
0.4811689026216877 0.2555495783666076 0.3795112323838403  
0.5916973215518654 0.2599791452505507 0.4695638784762997  
0.4019177723415698 0.2453606590022061 0.2242808019913460  
0.6017427151049994 0.2342706073788498 0.2544073448122335

Structure H2O/3 S=4

1.0000000000000000  
20.9172000884999996 0.0000000000000000 0.0000000000000000  
0.0000000000000000 17.8076000213999990 0.0000000000000000  
0.0000000000000000 0.0000000000000000 12.2158002853000003  
Al O C H Fe  
10 62 96 62 2  
Direct  
0.0816340941831211 0.2512669629910042 0.2526838538481084  
0.2503339698269590 0.7539073728860453 0.7507722869789171  
0.2453726569966743 0.2509617228089280 0.2507155571093296  
0.0843484117018299 0.7525874025109288 0.7528626548926446  
0.5858351146922449 0.7488795876771173 0.7484308598741923  
0.4172197775531385 0.7527196331113541 0.7414067827725580  
0.7533313922373860 0.2488877035898753 0.2549118413220403  
0.9186074775900083 0.7488987764011288 0.7581110355971099  
0.9174789633577392 0.2510989964606178 0.2558842087433895  
0.7528653680971837 0.7439577123903828 0.7627890869502738  
0.6661905562544455 0.2438792892404266 0.1881378116861631  
0.8360185772465111 0.7452946038501767 0.6952211562401780  
0.0019580687421319 0.7505892383461160 0.8208937791233302  
0.8358407143325576 0.2508602781250648 0.3220474247728582  
0.7825388936906135 0.1738952972780095 0.1472711010996054  
0.9487401121703939 0.6700531548426051 0.6563513981121912  
0.8874602358797234 0.3284159192985234 0.1573628701475848  
0.7276931047686002 0.8189341623616653 0.6589603929951684  
0.7799634351869243 0.8261565860578286 0.8621693991903233  
0.9473638481948807 0.3316179248358030 0.3532065305877574  
0.8921587863991461 0.6686072177886357 0.8593160832782314  
0.7370181590042020 0.1632704573877212 0.3543141759349142  
0.8887434037195425 0.8276764884359757 0.8593821367058793  
0.7197735259641630 0.3246977890259188 0.3559101003270899  
0.7834443600268129 0.6687859159093612 0.8624844904606492  
0.9452090842895722 0.1721584046442790 0.3584119488897889  
0.8909516013302531 0.1696104003475715 0.1543758823695079  
0.7243930386262959 0.6629073230698248 0.6662880062309875  
0.7789000815364142 0.3314065825176690 0.1617998325572113  
0.9447971421105527 0.8300601348626068 0.6573235551236032  
0.3276260103356715 0.2523947616240738 0.1780058902258636  
0.5021598950372368 0.7518063186986147 0.6781194829601982  
0.6678072812858149 0.7465543767076250 0.8229155002128018  
0.4884791184252203 0.2618708316755363 0.2947399853660084  
0.4410300394102152 0.1680416467535182 0.1354083476514591  
0.6161058925541711 0.6692572539963086 0.652622805592408  
0.5478609357006986 0.3383208988854126 0.1396358226636429  
0.3883495275309419 0.8329630362158548 0.6456096209543578  
0.4475518119231632 0.8282341234658853 0.8439836750639629  
0.6129587853927526 0.3436133845901482 0.3342293011139870  
0.5528530477252832 0.6718443104516758 0.8436011463854712  
0.3844368784275113 0.1699045785922324 0.3452211657738818  
0.5563944388566426 0.8282079610704286 0.8474471636342202  
0.3826051834362279 0.3370900831141449 0.3457818247349139  
0.4440111475826010 0.6720431162523496 0.8367871617951073  
0.6675832848064871 0.0963451685168588 0.2509283291248355  
0.5493065496663168 0.1759736463548858 0.1221296496733100

0.3848801284695055 0.6758075417453612 0.6401852461567377  
0.4384124723120371 0.3335256502154096 0.1272618784975274  
0.6190030983862483 0.8257760890360057 0.6507202782082507  
-0.0005448092407084 0.2505341338642444 0.1881773716958060  
0.1670621868014000 0.7531456012085839 0.6863122589812458  
0.3341827934896539 0.7529336651929651 0.8114082632956222  
0.1641555651891536 0.2516058422218398 0.3176514140664187  
0.1086288858133752 0.1713025583103397 0.1528435818462015  
0.2761793130948244 0.6745193827966696 0.6489155912276143  
0.2197880021437682 0.3306179076183741 0.1493033973180963  
0.0533398741991958 0.8308585586535884 0.6549533331047620  
0.1133076673410342 0.8318605672828715 0.8509601441262337  
0.2740155312719271 0.3318424581341137 0.3506964768290858  
0.2220689179743706 0.6734554777716063 0.8534184749591316  
0.0538225575725963 0.1711782611699718 0.3553042312011412  
0.2219081507348635 0.8329713970874200 0.8504528439941221  
0.0557308341479050 0.3312490067861598 0.3515469849177269  
0.1132621856433327 0.6733841260385480 0.8540006742886015  
0.2759125429135256 0.1723758323015092 0.3471800976413130  
0.2170099264877614 0.1719017223706160 0.1527184833201389  
0.0574338320338876 0.6723436119058513 0.6518044592829020  
0.1111845335914893 0.3312997438949227 0.1495811406514081  
0.2795681729078343 0.8328641891844405 0.6502665988675467  
0.4913433783530296 0.3379035168404088 0.5159399152271860  
0.5840036790726446 0.1873343278396952 0.3390819828803490  
0.1630272359213296 0.1431239408247090 0.1274475928103914  
0.3301453842391981 0.6470046367522913 0.6196557309938207  
0.1653052150655861 0.3594480490593795 0.1244680052905209  
0.3334203001848369 0.8609197047564418 0.6227967693465232  
0.1673440639022008 0.8604345487461434 0.8763409028286420  
0.0015072511827856 0.3597370464317198 0.3780927957196426  
0.1677549875442484 0.6450673519047136 0.8782665979122727  
-0.0002939224447658 0.1432713066181519 0.3818482390652532  
0.1638859296806901 0.0703297190992314 0.0626646551700312  
0.3288750934405165 0.5740651654106166 0.5552035202434020  
0.1660638809356897 0.4327666895965412 0.0603497736467699  
0.9988065198192627 0.9317076776737727 0.5656653258299398  
0.1664027731560575 0.9328136707421982 0.9424159161884081  
0.3277185901229807 0.4360496903737283 0.4369157420303282  
0.1672817108652266 0.5715117561641294 0.9421235970030454  
0.9996739811604972 0.0700205207959732 0.4463260606613670  
0.1069723559903697 0.0334791278968395 0.0328170274415195  
0.2710532631226954 0.5371511174150038 0.5308574344403002  
0.2237937431097495 0.4694047733993980 0.0345887223278644  
0.0565623073568350 0.9663210552141956 0.5344065438487519  
0.108195980063075 0.9661645233861711 0.9738314069932531  
0.2704658933564860 0.4695669838905240 0.4725711445406033  
0.2244159494129364 0.5371831401833629 0.9766437413294060  
0.0570054369133956 0.0339481499058691 0.4759935422187850  
0.2233165105519537 0.9694337316495347 0.9727570067872130  
0.0598170567308139 0.4684445015232986 0.4709687746434235  
0.1095396683519857 0.5348583279745995 0.9678094751925586  
0.2731166126432870 0.0347700310283548 0.4682876054586265  
0.2220940314239073 0.0367975796496024 0.0316289843154617  
0.0602240031463936 0.5357708312801196 0.5299995646295598  
0.1089078675406815 0.4670436175408011 0.0256879823164535  
0.2742353927419520 0.9675814707375371 0.5275603752313367  
0.4962613023749656 0.1427242879269026 0.1067225057172310  
0.6702865626032555 0.6381533961815964 0.6338808193989760  
0.4931026915683106 0.3631091902446001 0.1086222900803008  
0.6753205948793918 0.8495479013473719 0.6289046386509167  
0.5016447154855445 0.8562166819577585 0.8705824764750252  
0.3276082085650882 0.3628614122669168 0.3731524060115137  
0.4979800682598632 0.6439940690158146 0.8639334554448423  
0.3298076743446756 0.1429002520850878 0.3714486151766573  
0.4974731889560581 0.0677847530890757 0.0483644149212069  
0.6701189340974664 0.5662331248078762 0.5673091132498685  
0.4942920259006762 0.4348888010241820 0.0437331636275826  
0.3324056031490130 0.9335016164046122 0.5574255390754116  
0.5003494451344423 0.9289357905228642 0.9347753466443260  
0.6696119400407283 0.4314666673464059 0.4423313526622880  
0.4967179361083933 0.5711454117123895 0.9266223553184132  
0.3302579853886048 0.0704935082776695 0.4368845345524628  
0.4405939440230761 0.0336531127888818 0.0126293195055184  
0.6123731202086508 0.5317010574484327 0.5366699958109372  
0.5528354757821833 0.4694474074126421 0.0180253913976176  
0.3894720266380756 0.9694210740378975 0.5261722235153159  
0.4420402774501225 0.9653606030429935 0.9565992255090705  
0.6119930960938478 0.4654909595349586 0.4753892449645255  
0.5539315590715191 0.5368063814760716 0.9600489302964366  
0.3884449964800004 0.0366268419312459 0.4670861530505496  
0.5570730748004482 0.9626162820169535 0.9722583989302930  
0.3855342132322425 0.4728511802089575 0.4615178626976222  
0.4383089927728347 0.5363350958195342 0.9519400936521417  
0.6370960043644267 0.0083084734803137 0.4319032658578678  
0.5557906273437467 0.0308868998401889 0.0284541531953149  
0.3859817090860597 0.5404834761452928 0.5194293074845845  
0.437030811124397 0.4689837397264867 0.0098910746720680  
0.6293244585977618 0.9479308552015809 0.5028526381732699  
0.8364288020506538 0.1430448985099043 0.1262077994408581  
0.0030044005899443 0.6430044314480108 0.6290548954585024  
0.8334548697837013 0.3580414293882645 0.1344531635831139

0.9988126026023537 0.8587459840906086 0.6308087145120181  
0.8343240734903666 0.8554242733106412 0.8851000452723607  
0.6681236170865554 0.3610069296085897 0.3728174859436232  
0.8379833196021440 0.6406371040695181 0.8862144780857234  
0.7020763128622433 0.1051354768056618 0.3356432344128148  
0.8356450701758710 0.0691698612926713 0.0634789093582596  
0.0029430451982075 0.5699512662914216 0.5641886389869161  
0.8345515873431087 0.4306293131439318 0.0698718380612086  
0.6819463310182364 0.9188220039190519 0.5599238311011253  
0.8345038712151049 0.9293780267743027 0.9479854657699325  
0.0021122220174738 0.4322664597633690 0.4438135961599448  
0.8373629510436331 0.5681699110045766 0.9513128630076068  
0.6968700505740472 0.0436073737718546 0.4198795811525314  
0.7777644946059045 0.0343160957066416 0.03366691324828342  
0.9452396098453656 0.5337335961555130 0.5371835998898592  
0.8929018735268341 0.4638191562794307 0.0390817764435529  
0.7415105943854055 0.9546750000905312 0.5493887074054009  
0.7773070457254017 0.9659346687891527 0.9770875263782205  
0.9448057944033487 0.4663534667662712 0.4782624214892698  
0.8942850379789562 0.5313296109512152 0.9807920541595354  
0.7486070306835025 0.0173959699436877 0.4819023283487678  
0.8923382213788286 0.9642202615105050 0.9780235961953576  
0.7275207335071380 0.4654174789945651 0.4736120531103635  
0.7790204671859506 0.5348736754147878 0.9820755702088472  
0.9420327524542480 0.0352059699334337 0.4771792661171206  
0.8928480356891633 0.0324912515770898 0.0346662406915550  
0.7276700484627612 0.5316011269559818 0.5352584618440165  
0.7776210656529243 0.4673275642090644 0.0402046151229013  
0.9415252161011404 0.9676276085269708 0.5355958497852481  
-0.0011779692115333 0.2266693545530274 0.1166598923537045  
0.1670735556142849 0.7312195762574769 0.6134891567273241  
0.3359574080803902 0.7474132737123339 0.8903677037384391  
0.1639003778086282 0.2700199357584536 0.3924705234016017  
0.0613506847564476 0.0582242985839655 0.0567543919265497  
0.1015251080761060 0.9393003021211164 0.5568121022414458  
0.2252439807506090 0.4418152979332152 0.4539569374499076  
0.2697153851221316 0.5645097569555473 0.9572706737238698  
0.2688899168105547 0.9443334107237158 0.9492711788476907  
0.1047685635249225 0.4431770579094140 0.4445875203304130  
0.0646717489120336 0.5602291082153571 0.9411795052259012  
0.2276171192061658 0.0604180334011003 0.4456447097734090  
0.2666903353931092 0.0644395129576929 0.0545119580177838  
0.1055003058569425 0.5628041734203513 0.5503830483118677  
0.0636169813470106 0.4396289835607326 0.0448990555562297  
0.2296225375244849 0.9405373140620233 0.5517877407429560  
0.2262732792231544 0.5619692517717403 0.5588174785727696  
0.0636108910908446 0.9384439892989869 0.9510926145224378  
0.2687064737240225 0.4441869206273795 0.06122594611226037  
0.1023067322577972 0.0597137931529670 0.4524190943194717  
0.3273912035303653 0.2851667876228146 0.1139733869180004  
0.5036788162708452 0.7563067639938418 0.5989934718514729  
0.6658759448718040 0.7671345325969980 0.8964728285623480  
0.4623052110772820 0.3264796515887335 0.4553613811012317  
0.3952907787358688 0.0618030776495617 0.0291820391283923  
0.4350313080354710 0.9441522934396673 0.5493555868631835  
0.5666997678669939 0.4386171366541640 0.4545572368379105  
0.5992232971740602 0.5638724639194419 0.9399723659209355  
0.6024959318123971 0.9346477472914072 0.9561644349565894  
0.4306904854464734 0.4478136864779449 0.4361319978278572  
0.3940384650990757 0.5630237741983332 0.9252533912066832  
0.5965667453108882 0.0287274798028276 0.3843494828675847  
0.6000047952952725 0.0560338180174703 0.0584384078275683  
0.4312496821029164 0.5680573083698406 0.5382380126133659  
0.3916223640915103 0.4422801448775538 0.0299537945742695  
0.5827062325243175 0.9214224150114873 0.5129724588925718  
0.5673780165451783 0.5573936560726483 0.5619015680440983  
0.3977596572982852 0.9395651443509621 0.9280691504183436  
0.5971662660246163 0.4428187667216284 0.0444381907463764  
0.4330605744997696 0.0640425239094744 0.4438332639663939  
0.6646896809554087 0.1922920837488773 0.1588071588323379  
0.8342846212634665 0.7623963112642984 0.6198053166370112  
0.0031477556785989 0.7336328192875966 0.8964079840433739  
0.8352365896554417 0.2233128228325393 0.3907903287994796  
0.7327975778613599 0.0611454563637539 0.0564589677049597  
0.7822151103686446 0.9325617175201577 0.5949580993333315  
0.8995651225914408 0.4391931174412314 0.4580129818823634  
0.9398941623835738 0.5562556227208392 0.9570834259682055  
0.9371998348691976 0.9368034119741898 0.9560735519291054  
0.7724912807531525 0.4395322900759212 0.4485073624904296  
0.7345772020109608 0.5628670757623765 0.9593092584508990  
0.8971652655017431 0.0620577290605978 0.4540947742113701  
0.9382136061797298 0.0582543446919649 0.0577715565646395  
0.7727561248099999 0.5576506856405028 0.5592729117738330  
0.7320887419941865 0.4419975468415016 0.0633383711406895  
0.8961892075520843 0.9418227220248022 0.5586950069088052  
0.9003838445211999 0.5593806269558416 0.5633262937099254  
0.7319309112713199 0.9399976528855503 0.9543585347879039  
0.9373249150634171 0.4357263904058643 0.0617343759306544  
0.7948557847749149 0.0452836877684780 0.4748242086489926  
0.5250393200468061 0.3005730535034644 0.5078488794965098  
0.6116144867171412 0.1477236503237107 0.3026665425541172  
0.4132911107473156 0.2520977286911499 0.2390252826863783

0.5754859741052422 0.2597193802354436 0.2424985759281328

Structure H2O/3 monomeric Fe S=3/2

1.00000000000000  
20.9172000884999996 0.0000000000000000 0.0000000000000000  
0.0000000000000000 17.8076000213999990 0.0000000000000000  
0.0000000000000000 0.0000000000000000 12.2158002853000003  
Al O C H Fe  
11 62 96 62 1  
Direct  
0.4089978399015258 0.2551826346839986 0.2411437551593454  
0.0819825786483468 0.2513422215270705 0.2517333591699171  
0.2511065543445216 0.7557551163180090 0.7476363122258263  
0.2463219865157665 0.2521890734151790 0.2484494380048773  
0.0845954359474760 0.7524360734803457 0.7508424022161040  
0.5852068183827475 0.7488009194074863 0.7531265290338670  
0.4175426870306664 0.7552926365466897 0.7443509977534705  
0.7526613037916255 0.2461295007990461 0.2539985925890139  
0.9183613203804966 0.7474958994910720 0.7566403250719200  
0.9172630682379970 0.2503635742522807 0.2550946655644757  
0.7522140262745339 0.7418526480819431 0.7628230602162510  
0.6684554118678654 0.2434980259225004 0.1890958334439556  
0.8353699841427270 0.7433791416837444 0.6941826035925704  
0.0020442634651083 0.7495490371826300 0.8191471050187226  
0.8352690261344963 0.2496808351891368 0.3219013426854213  
0.7834677819406781 0.1735025286289030 0.1442282501557922  
0.9489663321906728 0.6693361293003843 0.6550589345219836  
0.8865218890496120 0.3270907530477703 0.1568060783927904  
0.7269593587282257 0.8158532446437428 0.6588608236662338  
0.7799605517484849 0.8248210676554028 0.8614002643324828  
0.9472748691039622 0.3313607954922326 0.3518261117182809  
0.8916043873392862 0.6668392016062079 0.8577466015465127  
0.7394111524917109 0.1590918865216235 0.3533791497155849  
0.8887464309186941 0.8263272530924179 0.8577652695588427  
0.7144836768075118 0.3214582584319440 0.3587546358590513  
0.7828943633135970 0.6672225348185936 0.8618875041084896  
0.9455201306044224 0.1720611966402711 0.3576818397824195  
0.8917420311009484 0.1683220255123847 0.1538330033867507  
0.7220064367744385 0.6601832187184964 0.6671156722687998  
0.7780362299365124 0.3316891642717794 0.1658436269216340  
0.9442964406177672 0.8290835949482738 0.6556389206655863  
0.3279324774320133 0.2537346986991516 0.1777039588941562  
0.5021408112160426 0.7525801113568428 0.6830250053665780  
0.6673318717991801 0.7458231627041298 0.8251529924944574  
0.4942647380075428 0.2648453950986751 0.2999116312594735  
0.4408966171475907 0.1731326443031949 0.1449205402575966  
0.6135584135143104 0.6669432183790706 0.6579430792144948  
0.5474573217124749 0.3340054451534907 0.1328618106907667  
0.3899662646324167 0.8350847470748265 0.6462220842012184  
0.4480740700124421 0.8333757157835953 0.8455113648227925  
0.6061216221968138 0.3399730141193555 0.3386374300712925  
0.5510035820217850 0.6735642160041433 0.8508399071396942  
0.3864832361744381 0.1760268167016479 0.3417196807327785  
0.5569072153898381 0.8316310425337452 0.8510066243398358  
0.3839780838279959 0.3349100171103986 0.3431416732269155  
0.4423822421636907 0.6751390342398688 0.8437554590397317  
0.6709217453543754 0.0925644407610554 0.2480874663483275  
0.5496496864872585 0.1757955988290894 0.1410946498493059  
0.3870180904641686 0.6765309802404585 0.6420200405282859  
0.4380741002915667 0.3320192283676031 0.1361107413899383  
0.6183021256921799 0.8237416754147853 0.6519178201026047  
0.9996409273117048 0.2504877807903332 0.1875057344096818  
0.1677372233553358 0.7537138176030751 0.6834690751029953  
0.3343107458114457 0.7557539762609436 0.8112952476734735  
0.1649934624371912 0.2522544049795397 0.3161757096519279  
0.1094356437457655 0.1719056669332943 0.1516343024543816  
0.2782262529653892 0.6759557908222166 0.6461682745459240  
0.2195464714688485 0.3312195815402222 0.1475267239737755  
0.0528821015188337 0.8304779835227784 0.6535729795389619  
0.1132195898650572 0.8321920073879783 0.8488248156877416  
0.2755162578561832 0.3337182652238215 0.3487240548165439  
0.2234382185220344 0.6746643825336854 0.8513818628035218  
0.0541854596924943 0.1708196269592056 0.3543584820751173  
0.2217679645785998 0.8348677605739203 0.8458968091330819  
0.0557298776766357 0.3304664850680394 0.3512080659576811  
0.1146501255596037 0.6738960071794928 0.8515487385350702  
0.2781851355609382 0.1748277047214667 0.3472061700323735  
0.2178355301835634 0.1719838905644848 0.1519626190997828  
0.0576866894697014 0.6721562286955999 0.6499942554258876  
0.1109792936328611 0.3323543819140724 0.1489454539404811  
0.2812792766684074 0.8352945475050720 0.6475756965900489  
0.4858588766486026 0.3355153433192611 0.5218171942609313  
0.5876230201591052 0.1840612199372837 0.3457436470056098  
0.1637711168985490 0.1435354344720345 0.1263430400424048  
0.3325127074022045 0.6480234601390656 0.6191080966294861  
0.1651127007795429 0.3603246744673859 0.1234009500358236  
0.3354071073137276 0.8633639713844232 0.6214511906893156  
0.1671760605424593 0.8615452835423204 0.8729800705321392  
0.0014714202271533 0.3592215466215944 0.3769584706038154  
0.1691941022389915 0.6459699668309611 0.8763244067214210  
0.9999992611139703 0.1431486645426956 0.3811725010886139  
0.1643950730901121 0.0709504872214550 0.0609426607313216

0.3317293526234426 0.5748577655102265 0.5542475526586560  
0.1662038187220089 0.4337581006579765 0.0593209926140735  
0.9982393765581885 0.9314872877426881 0.5651419019230493  
0.1663154149028316 0.9339150777717249 0.9392428941015892  
0.3304999884945636 0.4364885344124268 0.4349769057800736  
0.1685659679601204 0.5725356718807281 0.9407005767233957  
0.9996866155014533 0.0700212723439926 0.4460514826658024  
0.1073528565591359 0.0343975191801213 0.0310402773426841  
0.2740251110071905 0.5375634299406270 0.5302231541707799  
0.2241941203095420 0.4700520530600792 0.0340793574500628  
0.0561091172610470 0.9666613855537666 0.5358590045845270  
0.1082794029545463 0.9673345070868911 0.9713785997630813  
0.2733927174791707 0.4699494315185134 0.4719270515226925  
0.2253799466532390 0.5378293405136817 0.9760482433691534  
0.0568471422602980 0.0343559238396595 0.4776130576357466  
0.2233876089242409 0.9703048676595160 0.9694682847275645  
0.0599463207821018 0.4680892786903931 0.4690209034894055  
0.1105777935103709 0.5362419579569095 0.9660281403616744  
0.2768571178884249 0.0377801547949166 0.4652007524741978  
0.2224404479842680 0.0373587742145822 0.0291257251469484  
0.0604473650855530 0.5354899437018079 0.5278761805446976  
0.1093759866274159 0.4684748986581396 0.0240561928002558  
0.2774532295078668 0.9703448003723582 0.5239771587900336  
0.4947232986449228 0.1460107667775384 0.1181780381395055  
0.6673769377188075 0.6358048448160771 0.6365405640383485  
0.4920622502704768 0.3608660410079941 0.1099147178073752  
0.6746827408400029 0.8466908591574662 0.6287482652424908  
0.5023025920973487 0.8606990382881043 0.8727465733559503  
0.3295859908994774 0.3631866645219045 0.3711759818377683  
0.4959625684306899 0.6458844793698394 0.8710053363096567  
0.3328521376985973 0.1469087229607169 0.3702579917111395  
0.4975515387568397 0.0729553819798866 0.0540822837496100  
0.6660761642565507 0.5639141736194195 0.5687933915837301  
0.4923278378257912 0.4335510968069559 0.0461917677874872  
0.3352701021952163 0.9362138002124624 0.5557300563128973  
0.5011522918771645 0.9343816158798373 0.9368314663363918  
0.6637021003488699 0.4287479324303345 0.4430456666349994  
0.4942726806189180 0.5722461958241698 0.9325646337594949  
0.3341172317030239 0.0741742155359794 0.4355194609008105  
0.4411471091529194 0.0400037873560138 0.0133790398344383  
0.6080290322505250 0.5287102439248232 0.5414360056837509  
0.5505719456405630 0.4687159217569358 0.0200231969232529  
0.3925055328318182 0.9725809263729049 0.5260053363638413  
0.4430172528273419 0.9719939822648338 0.9562426640580014  
0.6066675388617985 0.4624315710786792 0.4799457636543427  
0.5514801902955745 0.5370232657926409 0.9642648247519772  
0.3919989464149773 0.0400835518087774 0.4671237956698046  
0.5573796766152895 0.9674482980530952 0.9776503729515487  
0.3881830746319321 0.4738899043499212 0.4587801221086538  
0.4360783028858920 0.5366695592562013 0.9576235607195369  
0.6396040944799416 0.0015526193696272 0.4237866858816925  
0.5558010944059094 0.0352469663540664 0.0355442961276553  
0.3887240522576181 0.5413971146744085 0.5174093195956710  
0.4350661912516876 0.4683813090172073 0.0138140048377750  
0.6306939020536075 0.9416636579517469 0.4952322322825526  
0.8372683464761275 0.1422336323513772 0.1242534175303432  
0.0032872184777227 0.64261155470932533 0.6273965307730666  
0.8324429455934282 0.3575109681355297 0.1363431175712299  
0.9982431199551595 0.8581978146674665 0.6296132975873578  
0.8343820882592740 0.8541957090120719 0.8836685839274792  
0.6629757545731372 0.3568433051104095 0.3747389588165521  
0.8375197782222439 0.6390426928059639 0.8853664703261893  
0.7047142678271847 0.1006418946087213 0.3333466871703504  
0.8364767772679171 0.0683889139000606 0.0612498028404494  
0.0032103303984916 0.5696960684977577 0.5622653878414152  
0.8335138146454834 0.4300986403785884 0.0716435276332679  
0.681855833829952 0.9151501753421418 0.5585105937585246  
0.8348299670554928 0.9283942939637063 0.9459882888179666  
0.0021935382316965 0.4319172412247884 0.4421931115177532  
0.8367120375268241 0.5669085131567051 0.9512156935414398  
0.6987068775406536 0.0390823273691817 0.4175923508294065  
0.7785007131144157 0.0331577019256209 0.0329708969194052  
0.945452702478340 0.5334886281731256 0.5354471633373694  
0.8919365202888199 0.4630734916614300 0.0408084087423189  
0.7408478554545492 0.9528324983644535 0.5531620546323752  
0.7777833045126624 0.9647262265150581 0.9765183259816971  
0.9449397800345941 0.4660723298219309 0.4766461929160211  
0.8935312504718573 0.5302159888891890 0.9816338564640942  
0.7487365029929829 0.0153294302247159 0.4855510498339131  
0.8927750224869661 0.9636531869200539 0.9743876750677447  
0.7219848569267148 0.4635474295386405 0.4707461025244072  
0.7782811818614402 0.5338878296845022 0.982197790259381  
0.9419128701637339 0.0348291556248146 0.4753199018459952  
0.8935473579145223 0.0319896105157684 0.0309117141632281  
0.7229960960726749 0.5296950893323893 0.5326404098896326  
0.7766586950346326 0.4667677947330056 0.0413927058988190  
0.9411029538163298 0.9671687905557060 0.5336004679823905  
0.9989093447426199 0.2281401112895964 0.1149706624080785  
0.1676788094141176 0.7314159424351062 0.6108624557930140  
0.3351498201184258 0.7376921134627861 0.8862995141439476  
0.1647456017118056 0.2699288869896960 0.3913772909683401  
0.0618541044665261 0.0591902921116125 0.0555507989406682

0.1009621935524650 0.9399679072469156 0.5596780693906186  
0.2280436414318147 0.4421705091906450 0.4543406451191114  
0.2709649971697110 0.5647474175531494 0.9573593806584128  
0.2688395610513873 0.9451745482412606 0.9453246310585751  
0.1048469513285973 0.4427238699186484 0.4425617887013741  
0.0659285897041042 0.5619150160155321 0.9389620196842214  
0.2314481815647237 0.0631004291231339 0.4412868061760517  
0.2671679677095097 0.0646788206492625 0.0521157659609282  
0.1057805832514099 0.5624655923648485 0.5480458680869861  
0.0638416459639443 0.4414524270237148 0.0427770479424546  
0.2325985941607020 0.9430637663299223 0.5462937812495219  
0.2292502890950591 0.5621960849634766 0.5586381026773631  
0.0635429465552524 0.9399282750184240 0.9486883056418486  
0.2688732700569328 0.4444840769437842 0.0612030820863042  
0.1022745696760476 0.0604752904312571 0.4556454597969059  
0.3256322980516435 0.2752944506284369 0.1047634299835955  
0.5040164424395328 0.7599000028852588 0.6043590230973287  
0.6663609199657430 0.7660320789987140 0.8989933859858545  
0.4538423345589023 0.3287567555061793 0.4641762592006134  
0.3955800024174255 0.0681903707983247 0.0274212590954629  
0.4379463540354640 0.9474504263572655 0.5501220661493542  
0.5609769096403372 0.4352896809658575 0.4627010279990367  
0.5967632164714622 0.5640871334043442 0.9441804392224697  
0.6029078308461880 0.9391394113150535 0.9637869688535726  
0.4333269923263790 0.4494364415767406 0.4320436297151040  
0.3915364999477928 0.5632184838383745 0.9319434398515742  
0.6006804906115436 0.0199656753699822 0.3708758183304108  
0.5999724735481846 0.0587519572468050 0.0683788128547701  
0.4340979763524103 0.5688827470836267 0.5356848525211491  
0.3896856785012985 0.4413347974586045 0.0332816520003128  
0.5844880031325708 0.9135241531562132 0.5008138260864756  
0.5633538181910904 0.5535515685070654 0.5699474873344603  
0.3989456792862970 0.9469210367337905 0.9254799522993965  
0.5951244163763802 0.4416319253334185 0.0442635637407553  
0.4369767733971525 0.0673067947446369 0.4452838877674496  
0.6649632687758092 0.1931953794923294 0.1566522631676812  
0.8331486692411216 0.7643328646552694 0.6208537226551721  
0.0032941854863099 0.7357928287476407 0.8960179203737432  
0.8346552393779523 0.2189870680592707 0.3878150015331018  
0.7336844034818664 0.0597211086658752 0.0572061181681513  
0.7803998675399192 0.9324083486957317 0.6031671674237372  
0.8996899276395848 0.4388491789170418 0.4565919296370923  
0.9392118745925027 0.5549189199677333 0.9579053983502933  
0.9375684775171969 0.9365168620099971 0.9513322809354222  
0.7666405359220533 0.4379929997550778 0.4434168115159438  
0.7338914943768986 0.5617012586334901 0.9586490620176151  
0.8971387223334919 0.0613682661646570 0.4509360393149521  
0.9390449891697967 0.0579910478013503 0.0526653463545154  
0.7685194709678711 0.5557754655573018 0.5540819695891297  
0.7310449943685509 0.4417092086283841 0.0647591200179453  
0.8955986943894054 0.9411397003878119 0.5551901175657561  
0.9006119277583290 0.5590899146106071 0.5617412265631238  
0.7322787166610485 0.9385588513905475 0.9551760543722297  
0.9362591600760172 0.4350386692051867 0.0641911827782024  
0.7943408672638859 0.0449825826980154 0.4832140637619344  
0.5194417484880427 0.3005042146671465 0.5007037544887406  
0.6186235000982050 0.1500529622504985 0.3063666862924366  
0.5702598416599629 0.2560380246527335 0.2503981781422782

Structure TS2 S=5

1.0000000000000000  
20.9172000884999996 0.0000000000000000 0.0000000000000000  
0.0000000000000000 17.8076000213999990 0.0000000000000000  
0.0000000000000000 0.0000000000000000 12.2158002853000003

Al O C H Fe

10 62 96 62 2

Selective dynamics

Direct

0.0809771341000030 0.2512119224000031 0.2531298233000001 F F F  
0.2500001220999977 0.7543365084000015 0.7519824267000033 F F F  
0.2439988781000011 0.2513513692000018 0.2511398693999993 F F F  
0.0839341475000026 0.7523886458999982 0.7532267144000002 F F F  
0.5854976868999984 0.7494561048999984 0.7469403958999976 F F F  
0.4170543620000018 0.7536907755999991 0.7422994360999979 F F F  
0.7550580212000000 0.2479719613999976 0.2539696832999994 F F F  
0.9181481919000021 0.7487817322000012 0.7573358280000022 F F F  
0.9177853229000021 0.2508672760000010 0.2553603579000026 F F F  
0.7524390308999998 0.7457668684999987 0.7612381854999981 F F F  
0.6683437302000002 0.2362269276000006 0.1904656459999998 F F F  
0.8355285144999982 0.7464922819999984 0.6939217744000032 F F F  
0.0014501209000031 0.7502001215000007 0.8206925523999971 F F F  
0.8363032752999970 0.2495670647000026 0.3218222598000011 F F F  
0.7850198630000023 0.1745050098000007 0.1458120623999974 F F F  
0.9482681603999978 0.6702042327000015 0.6556439901999980 F F F  
0.8868107962999972 0.3282462769999981 0.1564399454000025 F F F  
0.7268777962000001 0.8210127043000028 0.6564990003000020 F F F  
0.7797960572999969 0.8274996417000011 0.8601913409999966 F F F  
0.9466902440000027 0.3319624151000014 0.3524398700999996 F F F  
0.8912797010000020 0.6683072762999984 0.8574662596000024 F F F  
0.7326295495999986 0.1635293431000022 0.3521093498999974 F F F  
0.8886091095000026 0.8273659198999965 0.8589038715999990 F F F  
0.7214236017000033 0.3232590685000005 0.3585115497999993 F F F

0.7826285060999965 0.6696047950999997 0.8612406247999971 F F F  
0.9449009589999994 0.1721880696999989 0.3587051773000027 F F F  
0.8931692235000028 0.1693299227000011 0.1536718565999990 F F F  
0.7243006441999995 0.6650942783999980 0.6651222363000002 F F F  
0.7783209735000014 0.3311421650999975 0.1612576360000020 F F F  
0.9445070188999978 0.8296628471999981 0.6567880615000021 F F F  
0.3240359620000035 0.2530346881000014 0.1785087562999976 F F F  
0.5016227686000008 0.7512698124999986 0.6777019732000014 F F F  
0.6674705587999981 0.7483743813999979 0.8210306897000024 F F F  
0.4991185784088664 0.2671485769750070 0.3047557534561309 T T T  
0.4444244515999998 0.1668821620000003 0.1442063816000001 F F F  
0.6158290887999982 0.6685994114000025 0.6533081394999982 F F F  
0.5493079093999995 0.3314827841999985 0.1231911586000010 F F F  
0.3874907519999979 0.8325155376999973 0.6452336883999976 F F F  
0.4481252137000027 0.8310729620000004 0.8412842314999978 F F F  
0.6208357114999998 0.3571517673999978 0.3093847865999990 F F F  
0.5523861157000027 0.6736244865000032 0.8447464560000029 F F F  
0.3828863490000032 0.1716046681000023 0.3503855849999979 F F F  
0.5569954617999997 0.8300394788999981 0.8438970660999985 F F F  
0.3805975606000018 0.3373054675000020 0.3480532525000015 F F F  
0.4436030012999979 0.6746284959999969 0.8406431643999994 F F F  
0.6753259373999967 0.0925820162999997 0.2329380799999967 F F F  
0.5529445844999969 0.1672554407999982 0.1453680114999969 F F F  
0.3851841075000024 0.6754434751000034 0.6422772972999979 F F F  
0.4404016438000014 0.3332174291999976 0.1282855660999971 F F F  
0.6181188251999998 0.8243946477999984 0.6448148790999966 F F F  
0.9992744951000034 0.2510977760000017 0.1882219482999972 F F F  
0.1667516007000032 0.7529451875000035 0.6870806494999968 F F F  
0.3340460630000024 0.7541127953999975 0.8126704709000023 F F F  
0.1630720735999986 0.2519093144999971 0.3185038355000032 F F F  
0.1072754364000019 0.1715618309999982 0.1528274547999970 F F F  
0.2763913551000030 0.6751569540000020 0.6499411413999994 F F F  
0.2177641449000021 0.3312849948000007 0.1500652832000000 F F F  
0.0530591548999979 0.8307757585000033 0.6552086035000002 F F F  
0.1125375988000030 0.8318183860999966 0.8514034239999972 F F F  
0.2720376059000031 0.3319407592000019 0.3531604116000011 F F F  
0.2221411725999971 0.6740418274999982 0.8548455038000000 F F F  
0.0534215878999973 0.1707272188999980 0.3554260718999984 F F F  
0.2211243723999985 0.8335180186999978 0.8506779524999999 F F F  
0.0550376636999985 0.3306993981999966 0.3529498771999968 F F F  
0.1132988530999981 0.6737745535999977 0.8545520778000011 F F F  
0.2745775336999969 0.1719122614999975 0.3487138098000031 F F F  
0.2155152129000015 0.1715674304000032 0.1540939885000014 F F F  
0.0569869909000005 0.6721540675000028 0.6521277013999978 F F F  
0.1092766773999969 0.3321307976000014 0.1504590492999967 F F F  
0.2787762355999988 0.8330143916000026 0.6517333095000026 F F F  
0.5548004668505294 0.2419166687282160 0.4953111638622270 T T T  
0.6013756409472147 0.2089871638356960 0.3734148364854675 T T T  
0.1616553076000002 0.1431160368000022 0.1278431096000006 F F F  
0.3303014736999970 0.6472566114000031 0.6212594376000027 F F F  
0.1634398298999997 0.3602311949000025 0.1253692877000034 F F F  
0.3325584663000001 0.8607564818000029 0.6234496798999984 F F F  
0.1665164660999991 0.8607717937000032 0.8764061936999994 F F F  
0.0008588984999989 0.3597485188999983 0.3781534487999991 F F F  
0.1677224506000030 0.6456378769999986 0.8794456607000001 F F F  
0.9992850956000012 0.1429991862000008 0.3820661793999989 F F F  
0.1626117383000008 0.0706143963000017 0.0625268471999973 F F F  
0.3286426359000032 0.5743569631000014 0.5568411614000013 F F F  
0.1645333012999970 0.4335814283999966 0.0614423621999975 F F F  
0.9983705583000031 0.9314633557999983 0.5657179756999966 F F F  
0.1654144653999978 0.9333455522999969 0.9419483929000023 F F F  
0.3259073931000032 0.4363008659000016 0.4389199681000022 F F F  
0.1669568219000013 0.5722698569000002 0.9434934813999973 F F F  
0.9990648795999988 0.0697546258000017 0.4464681919999975 F F F  
0.1057656499000004 0.0338141573000001 0.0322920584999977 F F F  
0.2704410022999966 0.5384379137000010 0.5323139389999980 F F F  
0.2225669043999972 0.4699128461000015 0.0367747736000013 F F F  
0.0560693787000019 0.9670868087999978 0.5367944902000019 F F F  
0.1071351566000018 0.9665986931999981 0.9731130656000033 F F F  
0.2690470423999969 0.4707494262000012 0.4743059209000009 F F F  
0.2237881182999999 0.5377196001999991 0.9789689580999976 F F F  
0.0564258145000025 0.0347121745000010 0.4784399413999978 F F F  
0.2222854023000025 0.9700641765999976 0.9723295837000023 F F F  
0.0592222371000020 0.4685975009999979 0.4702949200000006 F F F  
0.1089233050999994 0.5359401912999999 0.9681998387999968 F F F  
0.2718679237000003 0.0350596024999987 0.4711394628999983 F F F  
0.2209149524000011 0.0373106405999977 0.0314592778999980 F F F  
0.0596899063000009 0.5359593469000004 0.5292198928000005 F F F  
0.1076893215999988 0.4681092034999992 0.0259543638999986 F F F  
0.2730920186000034 0.9676577194000018 0.5297892992999991 F F F  
0.4989729548000028 0.1386983511999986 0.1201108672999993 F F F  
0.6705068452999967 0.6390830057000016 0.6335374513000005 F F F  
0.4943322147999964 0.3610586738999970 0.1024958958999989 F F F  
0.6741685681000007 0.8492211817999973 0.6231587476000016 F F F  
0.5024505570999978 0.8583077875999976 0.8680358280999982 F F F  
0.3257606956999979 0.3630060985000014 0.3752905296000009 F F F  
0.4976225480999972 0.6460564360999967 0.8667007733999981 F F F  
0.3283569435999993 0.1432449850000026 0.3748388006999974 F F F  
0.4997967783000021 0.0658831096000014 0.0559342764999968 F F F  
0.6716475360999965 0.5676106344999994 0.5663226578000007 F F F  
0.4952168371999974 0.4345150115999985 0.0414325356999967 F F F  
0.3313498842000016 0.9333577160999980 0.5584874898000010 F F F



0.5018677651999965 0.9301309095000008 0.9342516349000007 F F F  
 0.6735731608999984 0.4349366782000033 0.4370775878999993 F F F  
 0.4965310396000007 0.5730185980999991 0.9289663604999987 F F F  
 0.3289613829999993 0.0706182158000033 0.4392928955000031 F F F  
 0.4429118174999971 0.0344177424999970 0.0151889504000025 F F F  
 0.6144801813000029 0.5344118196000025 0.5300007239000024 F F F  
 0.5533914025999991 0.4698261306999996 0.0156895005000024 F F F  
 0.3884011693000033 0.9689349849999971 0.5265265784999968 F F F  
 0.4439483184999986 0.9675998092999976 0.9554311460000022 F F F  
 0.6154616590999993 0.4695736990000015 0.4659633870999969 F F F  
 0.5539807286000027 0.5382269740999988 0.9601927591000035 F F F  
 0.3872101760999982 0.03622787374000035 0.4679346311000003 F F F  
 0.5586598796000004 0.9616159162999978 0.9753342583999967 F F F  
 0.3841209720999998 0.4722231145999984 0.4635390538999999 F F F  
 0.4383738734000033 0.5377143676999978 0.9547809999000023 F F F  
 0.6369975631999978 0.0000916400857562 0.4110805550999999 F F F  
 0.5577619429000009 0.0283051842000006 0.0355602369999986 F F F  
 0.3854630416999996 0.5399025922000007 0.5213046188999968 F F F  
 0.4376948239000029 0.46938878078999987 0.0104414810000009 F F F  
 0.6292056197000022 0.9402561854000027 0.4834489160000004 F F F  
 0.8386086363000018 0.1431866157999977 0.1247262759000023 F F F  
 0.0025502441000000 0.6430640116999982 0.6287173025000001 F F F  
 0.8328683776000005 0.3579383789999966 0.1335412310000024 F F F  
 0.9985322280999966 0.8585176890999975 0.6307408150000029 F F F  
 0.8344083190999996 0.8559779750000018 0.8837798349999986 F F F  
 0.6724490305999993 0.3666847774000033 0.3632761261999988 F F F  
 0.8369545039000030 0.6407973000999974 0.8845894709999982 F F F  
 0.7013423771999996 0.1026452446999997 0.3241066686000025 F F F  
 0.8375045216000032 0.0696194341999998 0.0615357758000030 F F F  
 0.0024390973999999 0.5701784480000001 0.5634694781999983 F F F  
 0.8337435254999974 0.4305690647999967 0.0688150081999979 F F F  
 0.6799519547000017 0.9171826233000004 0.5507462417999989 F F F  
 0.8351790010000002 0.9299267697000033 0.9463122773000023 F F F  
 0.0014903650000022 0.4324581808999994 0.4432763471999976 F F F  
 0.8362769148999973 0.5681291592999997 0.9495775007999967 F F F  
 0.6944720672000031 0.0410200302000021 0.4080972659999986 F F F  
 0.7793137459999997 0.0352040815999999 0.0325655756999979 F F F  
 0.9446975712999972 0.5340697824000031 0.5363412666999992 F F F  
 0.8920049512000006 0.4639408588000009 0.0378292759000018 F F F  
 0.7373960416000003 0.9581140621999964 0.5478052831999989 F F F  
 0.7782806128000033 0.9668118638999985 0.9761205065999974 F F F  
 0.9442167019999985 0.4666778770999969 0.4774835743999972 F F F  
 0.8932395612999997 0.5313727811999982 0.9792456353999981 F F F  
 0.7439941140999977 0.0204416409999979 0.4794228033999985 F F F  
 0.8933385376000018 0.9643915523000004 0.9754206944000003 F F F  
 0.7307141304000027 0.4668667557000035 0.4756359968000012 F F F  
 0.7780478673999980 0.5346668107000028 0.9805548611999981 F F F  
 0.9414423313000029 0.0339520961000019 0.4750133343000016 F F F  
 0.8944524521999995 0.0326639178000008 0.0319651304000033 F F F  
 0.7297167198000025 0.5324756511000004 0.5386238107999972 F F F  
 0.7767662113000000 0.4672090222000023 0.0390505028000021 F F F  
 0.9410252998999979 0.9663612060000020 0.5334352898999981 F F F  
 0.9987632018000028 0.2271859522999975 0.1167407049000033 F F F  
 0.1669046024000025 0.7317372823999975 0.6138198274000004 F F F  
 0.3360154686999977 0.7400234396000016 0.8893605522999977 F F F  
 0.1628704243999977 0.2748267212000002 0.3906580310000010 F F F  
 0.0601090563000000 0.0584938455000028 0.0561904237999968 F F F  
 0.11010285015999983 0.9408423332999973 0.5610785439000026 F F F  
 0.2234624868999973 0.4437965425999977 0.4558133944999980 F F F  
 0.2693310065999981 0.5648139380000003 0.9605705710999999 F F F  
 0.2679064650000029 0.9450989174000028 0.9487872711999970 F F F  
 0.1041346598999979 0.4432383362999985 0.4439115125000015 F F F  
 0.0643527723999995 0.5616612240999999 0.9408713149000008 F F F  
 0.2263969127999985 0.0610241701999996 0.4491006518000020 F F F  
 0.2654414162999998 0.0650107872999968 0.0546234326999979 F F F  
 0.1049918909999974 0.5629320769999993 0.5495656554000021 F F F  
 0.0621938717000035 0.4408835078999971 0.0443214845999975 F F F  
 0.2285620193000000 0.9405691211999994 0.5543871623999976 F F F  
 0.2259884915999990 0.5642661126000021 0.5599690626999987 F F F  
 0.0626142818000019 0.9388660902000012 0.9500553128999982 F F F  
 0.2671877977999984 0.4443551848000027 0.0641924780000025 F F F  
 0.1016587374000011 0.0613694390999981 0.4567100104999966 F F F  
 0.3222440787000025 0.2809091199999969 0.1099902643999968 F F F  
 0.5026764284000009 0.7561359805999999 0.5986032448999978 F F F  
 0.6652700897000017 0.7698858250000029 0.8939977618000015 F F F  
 0.5078520443654105 0.2607719628807036 0.3856601688624737 T T T  
 0.3978209144000004 0.0633068345999988 0.0308173224999990 F F F  
 0.4339170438000011 0.9431411664999985 0.5486624802000009 F F F  
 0.5708830132999978 0.4446075417000017 0.4373272089000011 F F F  
 0.5990396081000000 0.5656829635000022 0.9397390103999967 F F F  
 0.6038600469999977 0.9330706049000028 0.9593606824000034 F F F  
 0.4285746370999988 0.4460814958000014 0.4365657306000017 F F F  
 0.3937930935000011 0.5645416336000011 0.9299029830999999 F F F  
 0.5986299098999979 0.0160015963000006 0.3551820560999985 F F F  
 0.6019587687000012 0.0517136984000004 0.0685144897000001 F F F  
 0.4309776054999972 0.5669496448999993 0.5400099109999985 F F F  
 0.3925102210999967 0.4421435818000035 0.0306337564000003 F F F  
 0.5841084061000004 0.9095484970000030 0.4869326745999984 F F F  
 0.5691330972000017 0.5604743382000024 0.5524767367000010 F F F  
 0.3997023107000004 0.9435348513000008 0.9237044228000002 F F F  
 0.5979816525999979 0.4428240634999980 0.0399615213000004 F F F  
 0.4318047104000016 0.0631306550999966 0.4431856018000033 F F F

0.6672574187999984 0.1793276398000003 0.1816483903999995 F F F  
0.8341139858999966 0.7656808296000008 0.6195439557999975 F F F  
0.0023675549999993 0.7359819208000005 0.8973959842999975 F F F  
0.8359886713000009 0.2234802637999991 0.3917066503000015 F F F  
0.7346677951000018 0.0622733284999981 0.0564138446000015 F F F  
0.7767448264999999 0.9404558044000026 0.6004666076999996 F F F  
0.8989817868000003 0.4395369376000033 0.4571278308999993 F F F  
0.9388078260000015 0.5563389377999997 0.9554514955000002 F F F  
0.9379576430999990 0.9366558967999978 0.9529057431999988 F F F  
0.7760360095999985 0.4401304874999994 0.4545750201000018 F F F  
0.7335161139999968 0.5624451735999969 0.9577171315999990 F F F  
0.8964871394000014 0.0598312640999978 0.4500590626999994 F F F  
0.9400531455999968 0.0581460374000002 0.0543477100999965 F F F  
0.7742873587000005 0.5576310693000011 0.5670486671000035 F F F  
0.7312390968999978 0.4419577212999997 0.0624541373000014 F F F  
0.8956952857000005 0.9397716300000027 0.5546613635999975 F F F  
0.8998493747999987 0.5597591757999965 0.5624037267999995 F F F  
0.7326575099000010 0.9411317847999996 0.9543248999000014 F F F  
0.9365216802000020 0.4360716021000002 0.0605995429000004 F F F  
0.7883811379999983 0.0526173201999995 0.4792059660000021 F F F  
0.5452613796423190 0.1903291211755649 0.5183587764361797 T T T  
0.6455802902034414 0.2185460275124015 0.3987218877835533 T T T  
0.4112114059999996 0.2526776245000022 0.2439275472999997 F F F  
0.5821529819000020 0.2614647179999992 0.2359103901000026 F F F

Structure TS2 monomeric Fe S=5/2

1.0000000000000000  
20.9172000884999996 0.0000000000000000 0.0000000000000000  
0.0000000000000000 17.8076000213999990 0.0000000000000000  
0.0000000000000000 0.0000000000000000 12.2158002853000003

Al O C H Fe

11 62 96 62 1

Selective dynamics

Direct

0.4106849571309610 0.2532090352534127 0.2423820090906972 F F F  
0.0824779815925325 0.2511445532428596 0.2521350744854445 F F F  
0.2505537351246261 0.7543414453699455 0.7481189099073760 F F F  
0.2469232655958180 0.2513457475025689 0.2487294761033993 F F F  
0.0843092743093550 0.7522595990405634 0.7520834516805621 F F F  
0.5849952519188903 0.7495557446955274 0.7507754011074610 F F F  
0.4170656496688849 0.7533077300611026 0.7422211045525486 F F F  
0.7541672402313324 0.2485551864405338 0.2558890646768432 F F F  
0.9182322860856615 0.7489246475459908 0.7575231569623284 F F F  
0.9180043768623634 0.2508866022671583 0.2554706266197542 F F F  
0.7522294817827984 0.7461483891626628 0.7628021276461823 F F F  
0.6645869077188706 0.2366840642641677 0.1929949949085241 F F F  
0.8353790704602773 0.7467693756358642 0.6948402399758891 F F F  
0.0017416303703328 0.7501996390916190 0.8202480229394666 F F F  
0.8360281926083672 0.2498226134793597 0.3225840320877182 F F F  
0.7836857928018972 0.1747882989299825 0.1474738166251797 F F F  
0.9482715276870195 0.6700306494317658 0.6555591971482997 F F F  
0.8863489117618073 0.3282331334590083 0.1570705379529329 F F F  
0.7263236012667633 0.8213877069387721 0.6583141904054912 F F F  
0.7798199459791419 0.8276733629981692 0.8613327265991373 F F F  
0.9475548524477944 0.3316549280660510 0.3520958683349136 F F F  
0.8913036463770680 0.6683681572415736 0.8578911339491810 F F F  
0.7311884094562870 0.1641117246715851 0.3530718878322787 F F F  
0.8886487766117739 0.8278777976220439 0.8593625319952807 F F F  
0.7200817511505377 0.3237860200770584 0.3588315297599038 F F F  
0.7826508826135239 0.6699616351161310 0.8624795588231748 F F F  
0.9456121496091825 0.1722570714722593 0.3580311246719745 F F F  
0.8920159483598908 0.1699489639551004 0.1541523501446846 F F F  
0.7239321811512696 0.6655366901496507 0.6670994340201588 F F F  
0.7777558303058498 0.3310572529633404 0.1619800099187998 F F F  
0.9446110242563890 0.8298466525315646 0.6568198550178863 F F F  
0.3285618981322145 0.2523463806755970 0.1791688193083871 F F F  
0.5018742457672118 0.7511345896191841 0.6802806300225015 F F F  
0.6670461561990919 0.7488213176414575 0.8238195405678255 F F F  
0.4939366633323417 0.2633765254829115 0.3044194719106912 T T T  
0.4401674118836212 0.1717330671390584 0.1447289694157377 F F F  
0.6154328796474360 0.6687618030600433 0.6567027954252040 F F F  
0.5468194947068312 0.3311312373315047 0.1285406158450471 F F F  
0.3887438506370700 0.8327526543063613 0.6440515832333844 F F F  
0.4467796492755838 0.8308822116721970 0.8426466215610589 F F F  
0.6188845883819667 0.3576181981869198 0.3125166862409685 F F F  
0.5514794405987686 0.6726030773154292 0.8483520867371084 F F F  
0.3864287255662120 0.1749519217790478 0.3448764862196114 F F F  
0.555584735636643 0.8306621376544143 0.8478681519297879 F F F  
0.3831734224067063 0.3348021575532272 0.3411033822015526 F F F  
0.4427828909688287 0.6735165600534714 0.8415443186890457 F F F  
0.6732024651475470 0.0934294250572165 0.2346261935327121 F F F  
0.5487004665046200 0.1683353163569450 0.1443790999019612 F F F  
0.3863440451027884 0.6747241358286402 0.6411386719142129 F F F  
0.4379353646486805 0.3314542430274372 0.1363971571743647 F F F  
0.6175255909081230 0.8250022138529260 0.6480917436410181 F F F  
0.9999766751851382 0.2509400141112650 0.1878426364872681 F F F  
0.1671989472015767 0.7528013161102436 0.6844546491787256 F F F  
0.3339269962590592 0.7537651419326465 0.8102149124158089 F F F  
0.1651958116324153 0.2515826635788088 0.3164024360369098 F F F  
0.1091722935545576 0.1713844972725909 0.1521129972832753 F F F  
0.2775431386966218 0.6744276568605017 0.6460466576373065 F F F  
0.2197849146841193 0.3307219534324233 0.1475395150015402 F F F

0.0531754235139417 0.8306765027085987 0.6545143031822747 F F F  
0.1132414876886045 0.8316240617768287 0.8499597756394621 F F F  
0.2747198573016050 0.3314437407002657 0.3501896709255945 F F F  
0.2227672116861754 0.6737420931126294 0.8517525301261841 F F F  
0.0542325021218346 0.1707390240260125 0.3546560214271963 F F F  
0.2217950746270958 0.8336451271752026 0.8473100056525098 F F F  
0.0560006870638432 0.3307138400824954 0.3518660245225504 F F F  
0.1139495144269986 0.6735659858569036 0.8529534765881834 F F F  
0.2780097033396132 0.1727629991839237 0.3465179933943858 F F F  
0.2175810661724782 0.1717166373209622 0.1515507181463391 F F F  
0.0569959559847106 0.6722332422545207 0.6513176165203873 F F F  
0.1111585621372981 0.3318348219905758 0.1495303470774232 F F F  
0.2800677633360635 0.8339358893015572 0.6480629254306649 F F F  
0.5485362075739175 0.2424065636512438 0.4985020204184138 T T T  
0.5979687064380315 0.2099297396560615 0.3736523347333645 T T T  
0.1635400723305551 0.1431383113843410 0.1264336113170472 F F F  
0.3316933523602259 0.6463115507186643 0.6187836567036911 F F F  
0.1653403639544635 0.3597860977762082 0.1238880961426077 F F F  
0.3341846960206283 0.8616244688026740 0.6210808102383041 F F F  
0.1673144828471038 0.8606907911980386 0.8742223209884941 F F F  
0.0017936362247184 0.3595317931545097 0.377445249580626 F F F  
0.1684877617845828 0.6454211610027158 0.8773323425218749 F F F  
0.0000573329089733 0.1431127961880136 0.3813596029883755 F F F  
0.1641710952883386 0.0704434449826365 0.0612579165188407 F F F  
0.3308702794182068 0.5730165737821054 0.5544335153736668 F F F  
0.1661132796399301 0.4333592359315759 0.0601687412957830 F F F  
0.9985978279465471 0.9315757343319504 0.5654303665430547 F F F  
0.1664420850880504 0.9331393477460566 0.9402610564295486 F F F  
0.3295863414935624 0.4345824425873772 0.4355327781601517 F F F  
0.1679690418435413 0.5721509657280706 0.9419001085559131 F F F  
0.9996761456746555 0.0698787595319033 0.4459614121525561 F F F  
0.1072047728090197 0.0337571515236661 0.0312787586885079 F F F  
0.2731003050026501 0.5363683442983245 0.5290685686562568 F F F  
0.2239795242164320 0.4699566542081328 0.0351502122121872 F F F  
0.0563814903428579 0.9670758877470362 0.5366135877896525 F F F  
0.1083135255544434 0.9665636615296620 0.9719503426416765 F F F  
0.2724556670814735 0.4686996104123580 0.4708370533840807 F F F  
0.2249187510836421 0.5377601836854566 0.977239338999045 F F F  
0.0569275511581537 0.0346846465639814 0.4781797042915059 F F F  
0.2234226834403970 0.9696550047445101 0.9705993446954437 F F F  
0.0598191736160771 0.4685978342598247 0.4700962491414202 F F F  
0.1100879704014233 0.5356540325579218 0.9672305833079804 F F F  
0.2760663130199958 0.0375542294168696 0.4680908762687608 F F F  
0.2223020186565279 0.0368533155572379 0.0299039317320933 F F F  
0.0600042576248114 0.5359628142582906 0.5290688733667963 F F F  
0.1091358122445669 0.4678263055822072 0.0250951356605142 F F F  
0.2763556993398097 0.9700529497377701 0.5267182562201072 F F F  
0.4938410620901834 0.1414272195784534 0.1202639829722330 F F F  
0.6700562235526917 0.6394050930290547 0.6360521298406567 F F F  
0.4913304489895438 0.3597626180870535 0.1082471089760304 F F F  
0.6735005695458582 0.8496218764421286 0.6254359037450072 F F F  
0.5006663174321702 0.8587958276521945 0.8704706176390218 F F F  
0.3290944902070123 0.3614728365616884 0.3708748755007036 F F F  
0.4965396157168200 0.6448079788700554 0.8688674278141804 F F F  
0.3325885616675706 0.1454818656764800 0.3712717046264444 F F F  
0.4944852021149160 0.0680736746078878 0.0567465677142138 F F F  
0.6710785111537376 0.5680597897277906 0.5684782817969278 F F F  
0.4921543734120988 0.4326751455467956 0.0453258590746515 F F F  
0.3340514495956910 0.9347586496920144 0.5563248376519212 F F F  
0.4988126520010425 0.9312110561809419 0.9360659289553226 F F F  
0.6726326127477193 0.4354810223071439 0.4386949628961858 F F F  
0.4947496690910853 0.5713240179612598 0.9311461108590677 F F F  
0.3334730410310272 0.0727905628866310 0.4365802825698850 F F F  
0.4382527460554897 0.0353256331422358 0.0154765582034742 F F F  
0.6138231580273228 0.5348121746375298 0.5326524524249763 F F F  
0.5505463213137958 0.4676052365802832 0.0192633745189497 F F F  
0.3914547435026776 0.9700462401698147 0.5249828642299121 F F F  
0.4404331853629557 0.9681249130849849 0.9562887021436239 F F F  
0.6146322996520368 0.4700499272332905 0.4684466655675763 F F F  
0.5517673492100457 0.5358452316573974 0.9631810599109158 F F F  
0.3911754496792028 0.0375590735895202 0.4662523587568828 F F F  
0.5549178938865893 0.9639594198763035 0.9778032158755252 F F F  
0.3873617115823649 0.4711095869386241 0.4611681469339146 F F F  
0.4363861380439502 0.5362474477242429 0.9568050802516410 F F F  
0.6360168184094306 0.0002201360655150 0.4125983907575446 F F F  
0.5528739842353687 0.0309601950133995 0.0372689325371383 F F F  
0.3879835592776928 0.5388018341237384 0.5193617869997098 F F F  
0.4350292707216070 0.4680579513118701 0.0132243154917759 F F F  
0.6283842467011098 0.9404141277948170 0.4851366258442624 F F F  
0.8373798631802671 0.1437198950164387 0.1257936590927571 F F F  
0.0025471364639316 0.6429870051272104 0.6283067562547870 F F F  
0.8323628307003546 0.357809212634081 0.1341390121466546 F F F  
0.9986468049748822 0.8585777221956761 0.6304383614568110 F F F  
0.8344399787258254 0.8563397384646692 0.8845353823111850 F F F  
0.6709135088369536 0.3671501203624956 0.3647623900316503 F F F  
0.8369813148196101 0.6409449671857814 0.8852819352410393 F F F  
0.6998129632679309 0.1032433170404659 0.3254265581959643 F F F  
0.836483605503702 0.0701416441652611 0.0624406650945417 F F F  
0.0026225730708518 0.5700296399984168 0.5630949940669083 F F F  
0.8333197058307107 0.4304162358871295 0.0692058633032744 F F F  
0.6791971173467815 0.9174245924144628 0.5523699078702791 F F F  
0.8349283338839371 0.9303715196704161 0.9470448629252175 F F F

0.0022320964238034 0.4322489186531158 0.4427420371139874 F F F  
0.8361973778334857 0.5681119568918831 0.9500240900790118 F F F  
0.6934141396170261 0.0413148613061125 0.4092234597344202 F F F  
0.7784926391426055 0.0353154611200424 0.0333315786109267 F F F  
0.9450328380382729 0.5336756310855364 0.5357109665664126 F F F  
0.8916535256644949 0.4636677883621800 0.0382328387843174 F F F  
0.7366497208649037 0.9583692446013075 0.5487624415540537 F F F  
0.7778447394621821 0.9669240545690698 0.9768042248076156 F F F  
0.9448296257808906 0.4662868951839201 0.4767971121782608 F F F  
0.8930574145782515 0.5311319262284186 0.9796956841995481 F F F  
0.7431173263924720 0.0206575561883824 0.4801823025087941 F F F  
0.8928861267509305 0.9652562805842848 0.9762637900069180 F F F  
0.7298836285989978 0.4675100935270038 0.4766188418992243 F F F  
0.7778985778132395 0.5347330838549738 0.9808782841192780 F F F  
0.9419617128401043 0.0342181706639550 0.4744685458736271 F F F  
0.8936193789107634 0.0335376205524440 0.0328505080849979 F F F  
0.7290604130987077 0.5330257235559870 0.5399073533212189 F F F  
0.7764461308149464 0.4672385860619386 0.0393155479068810 F F F  
0.9413574433762122 0.9666488523921686 0.5329802638416155 F F F  
0.9993663139095261 0.2279888575452915 0.1156950295087285 F F F  
0.1668051890478495 0.7313453076393372 0.6113338757079561 F F F  
0.3351455849320999 0.7396716748944812 0.8869533679298129 F F F  
0.1654798981693588 0.2729713736865662 0.3895481377575507 F F F  
0.0616209524825564 0.0585195776477647 0.0554243974012252 F F F  
0.1012851965638859 0.9407514526428074 0.5610246206170757 F F F  
0.2270686818917369 0.4414471312664077 0.4518580790008073 F F F  
0.2703752527918937 0.5649815888956198 0.9586156817431473 F F F  
0.2689608014279656 0.9445705149403096 0.9468688504157186 F F F  
0.1048642865292990 0.4434214863443771 0.4439817056585511 F F F  
0.0653648541086653 0.5611979836546936 0.9402612592108497 F F F  
0.2308360694883760 0.0639126722471914 0.4456004755263763 F F F  
0.2669385688155756 0.0643143298778810 0.0530338331731883 F F F  
0.1052234740798568 0.5630497602531932 0.5496434706107323 F F F  
0.0637097219881753 0.4405425298540138 0.0438058984384639 F F F  
0.2313489378123776 0.9436827429025811 0.5504757734728969 F F F  
0.2282684535985879 0.5616067339390938 0.5561300357846690 F F F  
0.0636595815805876 0.9390223455020958 0.9491326169217587 F F F  
0.2686987690357228 0.4445337784756660 0.0623727082893666 F F F  
0.1022595745999766 0.0611720169345489 0.4565970281758638 F F F  
0.3268285980325700 0.2733363406421390 0.1058504081768277 F F F  
0.5036093304438580 0.7562535519629279 0.6012459205257841 F F F  
0.6653284108032125 0.7705658034981724 0.8966929928022864 F F F  
0.5021077010176711 0.2569429077385195 0.3852783411652183 T T T  
0.3926346292017158 0.0633624767659811 0.0300306991474741 F F F  
0.4367497329870815 0.9438799272274707 0.5475784209209138 F F F  
0.5699730574648001 0.4450272049845125 0.4403138818809893 F F F  
0.5971727051896067 0.5626522497078454 0.9431036819578651 F F F  
0.6006152275085341 0.9362107605736512 0.9629936976662350 F F F  
0.4321898279577994 0.4455692055226379 0.4346816051285174 F F F  
0.3919513363385505 0.5631991475368778 0.9314240885857075 F F F  
0.5975133441809533 0.0160082539721174 0.3569028585706491 F F F  
0.5967492692113154 0.0550895868761359 0.0703289969665022 F F F  
0.4333255447165740 0.5660886024915328 0.5386010547572724 F F F  
0.3894916810794982 0.4415324278443009 0.0332233441277054 F F F  
0.5832819424267157 0.9097200035432991 0.4887868316196418 F F F  
0.5685207428906267 0.5607448100954073 0.5557059582702379 F F F  
0.3965448690140434 0.9433425528961905 0.9242585581469243 F F F  
0.5950076211384641 0.4405270187331496 0.0440196795643644 F F F  
0.4362459182514229 0.0636831679712273 0.4422390278055630 F F F  
0.6642679218877277 0.1795636724907510 0.1846724045201427 F F F  
0.8337926615597837 0.7654224765879007 0.6201820497950479 F F F  
0.0028689012763650 0.7358895954609679 0.8969144406278886 F F F  
0.8359486659348434 0.2246277896615680 0.3931621854042575 F F F  
0.7336687567009790 0.0620469445876992 0.0570595356584604 F F F  
0.7761588195308420 0.9408081309778851 0.6011490374820383 F F F  
0.8996789144709467 0.4390153138002901 0.4562569377342314 F F F  
0.9387051678553462 0.5559512327830731 0.9560070019574880 F F F  
0.9376765354815078 0.9378572431078425 0.9538403476420214 F F F  
0.7751904801668559 0.4409520911015150 0.4549686245626177 F F F  
0.7334200604447858 0.5626264507261141 0.9580269024251535 F F F  
0.8970565489135538 0.0601796442185218 0.4494079280962282 F F F  
0.9390996064228148 0.0592934116586505 0.0552916209001992 F F F  
0.7737370827993644 0.5581460553940403 0.5679240952820948 F F F  
0.7308369239498944 0.4421413129878360 0.0626106808131794 F F F  
0.8959433858256034 0.9402093974296264 0.5541068680031316 F F F  
0.9000551998686817 0.5591515282262307 0.5615798790168682 F F F  
0.7323479149580052 0.9409739508699815 0.9549100896091502 F F F  
0.9361292116628519 0.4357110170072005 0.0610103520339678 F F F  
0.7875522534459662 0.0527556808412299 0.4796467576942405 F F F  
0.5413440435720176 0.1903433289194112 0.5218391522104184 T T T  
0.6418921586353505 0.220968000834820 0.3988573775255873 T T T  
0.5780746700310502 0.2599295637525003 0.2373371286064684 T T T

Structure CH4/3 S=4  
1.0000000000000000  
20.9172000884999996 0.0000000000000000 0.0000000000000000  
0.0000000000000000 17.8076000213999990 0.0000000000000000  
0.0000000000000000 0.0000000000000000 12.2158002853000003  
Al O C H Fe  
10 61 97 64 2  
Direct  
0.0856091548481069 0.2494891424649718 0.2540839632758969

0.2491374395741292 0.7552033906553631 0.7615468191676935  
0.2499053342742949 0.2511821279972568 0.2531272871987487  
0.0833986533306672 0.7520064121644011 0.7568482511773097  
0.5845124472355243 0.7436917746766181 0.7421099542027180  
0.4162440056628685 0.7481621259620874 0.7481154024204126  
0.7568108385405513 0.2455019721997347 0.2509813654059298  
0.9175795186792123 0.7476894538597710 0.7525078768169485  
0.9209704433457894 0.2483202322852654 0.2528864742655339  
0.7513400134787417 0.7441234057170119 0.7503849093422452  
0.6747475045472821 0.2460909242688073 0.1781228607041065  
0.8347077609720838 0.7456251922233884 0.6862481431787312  
1.0001139097498974 0.7490791932193170 0.8203099212822141  
0.8383622370177088 0.2475630254541519 0.3175951184943087  
0.7854568941317415 0.1674498785562753 0.1509346045086688  
0.9487294499613684 0.6701224860430685 0.6508515262617659  
0.8909032695220700 0.3265691976126615 0.1515863132555488  
0.7237600525318912 0.8218066174213234 0.6461648084811051  
0.7778287590600815 0.8260908894470734 0.8516208835037055  
0.9491071831423165 0.3301180426638082 0.3506051094669683  
0.8902742304003136 0.6666549563673244 0.8507007085090531  
0.7284269740337392 0.1644969050407032 0.3478231914530913  
0.8865543439650361 0.8248124892868149 0.8539709768588022  
0.7262511796023859 0.3234123149050681 0.3518157799233785  
0.7816066839816681 0.6662775586661323 0.8509927795561228  
0.9478394889876693 0.1709662304658943 0.3567452306320562  
0.8940056712643846 0.1664702701965202 0.151531748189128  
0.7231946708056161 0.6636277085591302 0.6520859701811973  
0.7824442538022004 0.3262049042660458 0.1518552006543609  
0.9445537086850662 0.8290941208747177 0.6551326829744458  
0.3356320029751970 0.2557313774603406 0.1871499853392370  
0.4999250008762480 0.7460449069692341 0.6782424021156245  
0.6675559289081651 0.7444190022442303 0.8120710754033404  
0.4185479753224208 0.3121620402084438 0.3375047276233089  
0.4506705045247599 0.1602427966846636 0.1371547366206408  
0.6145680195927302 0.6645575016060752 0.6459436261903291  
0.5637096806548280 0.3292512754584814 0.1368508305327144  
0.3878922414735199 0.8294376803670259 0.6518361309910449  
0.4489245320320289 0.8229149711819636 0.8475267207654203  
0.6173872571212823 0.3242199299187455 0.3510111787888507  
0.5538420207668397 0.6668551622400519 0.8402780597320243  
0.3909956432758913 0.1555730884998676 0.3344423939377386  
0.5577694233602069 0.8232835598290120 0.8418264740962406  
0.3353430957773161 0.4034307453711266 0.2485153866685323  
0.4450533961743953 0.6663702747827399 0.8426491038878644  
0.6204208120203806 0.1551697730593967 0.3341393279273892  
0.5599432046778490 0.1651590486947476 0.1231037854942163  
0.3818779229847750 0.6740639953349247 0.6490846269536306  
0.4554381699233775 0.3210885327899075 0.1224750918112938  
0.6148862135998158 0.8222945665113860 0.6412115085692383  
0.0030742842702925 0.2482924508056415 0.1879972423305818  
0.1660907282880612 0.7542577753443991 0.6936118644517691  
0.3340714902299917 0.7519304813762645 0.8212576680717038  
0.1675497916185302 0.2487491105904512 0.3202230238967965  
0.1150392375048543 0.1722059863912572 0.1542571344405207  
0.2732257201849548 0.6783499127643454 0.6610188961023370  
0.2208940129748317 0.3261023820222910 0.1448550105066238  
0.0530709184983543 0.8307898131585723 0.6586096174334362  
0.1119148115822866 0.8322443880300860 0.8564496466749069  
0.2658619709251243 0.3370770575363840 0.3524910121175079  
0.2200256182928910 0.6748224867517255 0.8630411361378509  
0.0564399017143181 0.1687442598109023 0.3544282570838015  
0.2206246346096133 0.8322834787950064 0.8588125254078424  
0.0575764233047575 0.3288413749602193 0.3536647045212879  
0.1112793210162406 0.6724562212598303 0.8586210961915810  
0.2840562425141740 0.1741208304368914 0.3551520095290029  
0.2236574808883086 0.1687792205311452 0.1600337320405314  
0.0574855964062992 0.6715557108073092 0.6524904453790243  
0.1125138436726677 0.3301678322283192 0.1530620017586609  
0.2793009047331720 0.8347273040083794 0.6617694303833864  
0.5138583545654624 0.2341388450267534 0.2955759849236109  
0.5139501649248623 0.2553957391764684 0.5889711630493264  
0.1692459420720119 0.1426685512109197 0.1313513460241413  
0.3257939091759569 0.6491887615075279 0.6289556026343572  
0.1668212491013542 0.3568033519673820 0.1245016965490370  
0.3335870330628478 0.8598032240246901 0.6311542920909411  
0.1659330703311354 0.8605443056534711 0.8822712955357348  
0.0032563416798580 0.3581785880812468 0.3767924707666654  
0.1658821166831984 0.6450862203437606 0.8852420361329328  
0.0021090545345837 0.1417121693346694 0.3810506076760559  
0.1685207154376337 0.0707179780475964 0.0653315674021911  
0.3198685720203859 0.5804146151437019 0.5592251258732086  
0.1668696799992710 0.4308378910400407 0.0620770673791296  
0.9993714314309594 0.9311902784706273 0.5667957431541186  
0.1664967997335465 0.9334911127116556 0.9461077300843109  
0.3059383422574424 0.4568099821847094 0.4174137379246703  
0.1661326206772279 0.5710918352914677 0.9478577054868633  
0.0012074839284152 0.0690131754475050 0.4466976228218514  
0.1104155548444961 0.0375730555968091 0.0332480063680616  
0.2632861274751162 0.5378117294205214 0.5593046174919802  
0.2241073014640617 0.4693989565768478 0.0393302209231384  
0.0573296622617344 0.9641268146462519 0.5331058057611099  
0.1093637963153338 0.9702017896313023 0.9746421873781150

0.2570029115845034 0.4753909623385597 0.4910191828474417  
0.2236485632404420 0.5380443068709222 0.9834326920360609  
0.0582329553339696 0.0315444155899573 0.4742762090374293  
0.2246386458471752 0.9670025201235106 0.9773608709263653  
0.0607861835076377 0.4700674307550386 0.4633498148887183  
0.1089349016949546 0.5325225025129743 0.9709938236766182  
0.2772451178354879 0.0367139508075525 0.4796744363345025  
0.2256900267410439 0.0343577160433451 0.0359643673047907  
0.0610090078223374 0.5376438813777200 0.5219416994450682  
0.1092932046285167 0.4640084705227327 0.0270228139522422  
0.2768667661874761 0.9701609044520293 0.5404497619437275  
0.5055107244867036 0.1356247235364451 0.1053225239365195  
0.6692428741297478 0.6358142288970378 0.6241055055350082  
0.5084246552909223 0.3540217330326569 0.1065456076276094  
0.6698290828135476 0.8499315051897441 0.6184606875702013  
0.5036463955252714 0.8513359549331496 0.8681361549147031  
0.3009239387994169 0.3951185745348578 0.3334584732914073  
0.4997694376169153 0.6384733299578791 0.8659483143432356  
0.3357179714044032 0.1379797745121663 0.3719890199793106  
0.5043567191098981 0.0633463949975073 0.0411267651534440  
0.6699025636845898 0.5627884109400775 0.5596827590926855  
0.5063954072690470 0.4279171648337426 0.0456666102162001  
0.3339908599982493 0.9317021850464686 0.5642207300004833  
0.5040255329875762 0.9249026922825250 0.9290425402321743  
0.6712373303052803 0.4248365706658793 0.4410752810239916  
0.5014682732873734 0.5656617146402172 0.9296544344652228  
0.3347881076463161 0.0669146573194310 0.4401816786288084  
0.4463019481290902 0.0288176537177871 0.0124271933232802  
0.6126625505729661 0.5257783127896366 0.5320443952291291  
0.5628118733019378 0.4649220787307189 0.0145303349456755  
0.3915982680873555 0.9622946713830480 0.5249355646528914  
0.4462688972642024 0.9603952759928410 0.9569432307419932  
0.6132553620868076 0.4580567118622003 0.4740099092914540  
0.5603927289225059 0.5326291840463356 0.9572363549969538  
0.3920564262002462 0.0285401182732677 0.4637931158459204  
0.5619130339397456 0.9599400138691949 0.9569403591847965  
0.3627135236623671 0.4991908066387505 0.4185857187560390  
0.4450070504458047 0.5288339717131599 0.9615122207082446  
0.6160721747496849 0.0258220110140068 0.4620901875251402  
0.5621578017990142 0.0283890014562615 0.0121874384496251  
0.3703300752778945 0.5589799658222873 0.4905392976456260  
0.4473481229427103 0.4610159086023105 0.0187611273815603  
0.6145982313250646 0.9586969409740250 0.5212571338740365  
0.8395618267050743 0.1384964886357000 0.1262179399587665  
0.0034543232808686 0.6428247922852008 0.6260852559668505  
0.8367637793767404 0.3548255906823743 0.1263814016202760  
0.9989147130499625 0.8582662635437140 0.6317004906525426  
0.8323827857484042 0.8537142269218498 0.8777996139901884  
0.6719390924510114 0.3519290711497167 0.3762513414761303  
0.8359654985938664 0.6383062736873896 0.8761165495222567  
0.6750477791882374 0.1318552551785034 0.3665764755025454  
0.8380130286072742 0.0652865954300584 0.0617412401020536  
0.0038125420939742 0.5700753616367946 0.5600910212928129  
0.8364132503523785 0.4276651758463911 0.0614796390721934  
0.6714048302028603 0.9224779306729234 0.5529958810358722  
0.8337214088754898 0.9269152637416113 0.9425953551332296  
0.0034439274879725 0.4317218297501708 0.4404732358885766  
0.8361896657547062 0.5654982258724893 0.9414501796185748  
0.6744850305458641 0.0594896505259688 0.4323790742251846  
0.7794917386922097 0.0333688664707545 0.0286511972631586  
0.9464041413003026 0.5321121718613699 0.5362306229499461  
0.8938972445103505 0.4620829142933645 0.0287383778476602  
0.7297542421518080 0.9562821139023457 0.5235796819236705  
0.7774028863060066 0.9657349204678162 0.9703537513937583  
0.9462034176640109 0.4645152201188316 0.4777601433069279  
0.8937547518874130 0.5294984237515729 0.9699171141691345  
0.7313383727736960 0.0234984030212732 0.4643798881779171  
0.8922264046214791 0.9588399287780017 0.9757432333255569  
0.7284981039714499 0.4617455562856824 0.4687295435182577  
0.7787036658502348 0.5311730938911002 0.9743985352458536  
0.9432882484269717 0.0361778644239643 0.4806895126496497  
0.8943384402216774 0.0264546282988390 0.0340663198227289  
0.7278236112358982 0.5293247837881268 0.5270570687203467  
0.7788478574548018 0.4637611509954015 0.0332179342580360  
0.9423595718581905 0.9687453654416152 0.5394825297858619  
0.0035664880726789 0.2348577962507699 0.1110034235967924  
0.1676627676237875 0.7310250178106539 0.6216970851581904  
0.3364718728188120 0.7483421654866468 0.9003997444026450  
0.1685938461097606 0.2754440593020538 0.3896390606601895  
0.0658197923463514 0.0654375757766083 0.0554611360361145  
0.1020236282654897 0.9358671989929620 0.5537664114072665  
0.2135329001159661 0.4415452771531997 0.4929069528339016  
0.2685229461608514 0.5671143373424532 0.9666817316368495  
0.2692380786982638 0.9392744275181272 0.9547999879641909  
0.1056855740177973 0.4463981224981526 0.4337664942729888  
0.0637748316333802 0.5569846736763003 0.9440066779662540  
0.2327796968035063 0.0662806643850743 0.4616248470345070  
0.2710674701679748 0.0597226450397871 0.0599551073199779  
0.1061713616768757 0.5661415324004774 0.5385161509403389  
0.0644356938129466 0.4350956624120019 0.0444767299211231  
0.2318649692383270 0.9471403316665620 0.5705837486683313  
0.2244897336293680 0.5541348405503268 0.6140607850622902

0.0639783264003340 0.9451248964372647 0.9500981763878884  
0.2692149201565034 0.4453635003852554 0.0674202614059390  
0.1036333373680178 0.0560635593341879 0.4485699424027333  
0.3375102711521950 0.3077357170786859 0.1593208521163649  
0.4990070700667955 0.7573531599427176 0.6005403162862669  
0.6659614523988491 0.7651474737101546 0.8855703071485087  
0.3914683262903280 0.3519243834933983 0.3003903265557556  
0.4014162213621507 0.0561481497219078 0.0342636500938456  
0.4362924187548056 0.9332434004989971 0.5431048409130034  
0.5684201956381750 0.4299704253500339 0.4537207187668430  
0.6043552016759917 0.5608637092996490 0.9325733540185112  
0.6067060851341485 0.9326483726356404 0.9344752466585904  
0.4007787107819871 0.4846936280224730 0.3614558877636552  
0.3990588819066544 0.5539212671948205 0.9402343418241608  
0.5715888327573473 0.0533065919246428 0.4382689038532250  
0.6070293639897273 0.0555979586656717 0.0342961582545046  
0.4147465408260722 0.5910547182773475 0.4925680915358889  
0.4032939932694286 0.4331155801710355 0.0438396835354866  
0.5689466780169495 0.9335140512973310 0.5440781004065305  
0.5673131141139184 0.5506849008295533 0.5571946454172987  
0.4013773486635423 0.9333818451159102 0.9342238655481412  
0.6086771750494987 0.4397093417674157 0.0357877591254552  
0.4371191763387759 0.0513754214030195 0.4335186845243794  
0.6741091382902374 0.2810711486620179 0.1166235647593221  
0.8347195826333006 0.7587357034372444 0.6091091803633923  
0.9998009819978140 0.7297064443368900 0.8946344235447838  
0.8385285284727511 0.2366687439282425 0.3954407801374868  
0.7352766887883800 0.0626251690389552 0.0493819062490026  
0.7742216935613150 0.9290186937383850 0.5480550794193859  
0.9011148992933654 0.4360911293252527 0.4603476296236873  
0.9388579195179360 0.5550565111010048 0.9449288762994783  
0.9364457264742283 0.9296341187626584 0.9549103144221681  
0.7737802252031918 0.4367110714449717 0.4435041410218645  
0.7335634149579801 0.5582059484608450 0.9531287045908705  
0.8985603555698030 0.0643835565394010 0.4601631421166966  
0.9402548653522921 0.0498524139937714 0.0593048617746092  
0.7726297324094773 0.5571931295652062 0.5481053898883259  
0.7337064245744666 0.4384176668487423 0.0584717189134722  
0.8969209383890645 0.9444722687506192 0.5654569397337781  
0.9014992666272719 0.5563775554940782 0.5648137856812946  
0.7314863687373727 0.9423014380241456 0.9451893729143466  
0.9390335232438738 0.4351605398797828 0.0503204063805920  
0.7770453606740627 0.0486746424960075 0.4418684724516151  
0.5230102422482952 0.2039581002286885 0.6360270502168414  
0.5160542422143083 0.2433130407277563 0.5010321923187414  
0.4663895771400945 0.2772823849646751 0.6094416224771053  
0.5502902578277663 0.2975814036593801 0.6095324854248323  
0.4268673334164743 0.2386880180247763 0.2427649672166717  
0.5889575969702039 0.2428779916178701 0.2402134869505319

Structure CH4/3 monomeric Fe S=3/2

1.0000000000000000  
20.9172000884999996 0.0000000000000000 0.0000000000000000  
0.0000000000000000 17.8076000213999990 0.0000000000000000  
0.0000000000000000 0.0000000000000000 12.2158002853000003

Al O C H Fe  
11 61 97 64 1

Direct

0.0854746165322955 0.2494804068286298 0.2539571641461152  
0.2493984345728147 0.7552156394865869 0.7618352145585443  
0.2502188627037152 0.2523885706898107 0.2520672223361575  
0.0835704593887237 0.7518329825827104 0.7566981665750681  
0.5846264044941079 0.7433847400168628 0.7421017700542328  
0.4166269783075974 0.7482625361340799 0.7499543831404687  
0.7562174004507154 0.2458688226709566 0.2482084926366075  
0.9176172327079999 0.7477572621865881 0.7515881153728410  
0.9207068378758755 0.2485006194836833 0.2520701508457681  
0.7512205709564229 0.7443217450378417 0.7476011760971087  
0.5936035228862575 0.2420648230706394 0.2403880358725171  
0.6746416471863653 0.2459797448634281 0.1764550417013847  
0.8345823859926556 0.7459597791790405 0.6842689481901910  
0.0001813620257205 0.7489447061870911 0.8198737105603480  
0.8377291263496132 0.2477008537214992 0.3158793447145923  
0.7856486800957038 0.1679203238293309 0.1482998303524214  
0.9487620930355276 0.670902795396454 0.6504457984975837  
0.8910154149990227 0.3271053905044855 0.1508316360088797  
0.7231362563205018 0.8229022594637869 0.6436049147064313  
0.776869035876419 0.8263362020120222 0.8496357030443142  
0.9487054524814816 0.3300056222594214 0.3503058065168594  
0.8900720240459244 0.6670742762785775 0.8494749263759581  
0.7273193283801891 0.1646249076890088 0.3450324673438634  
0.8864111833108554 0.8247410877259334 0.8528836161120987  
0.7244766005940466 0.3227690649279905 0.3501908255497025  
0.7814193362202059 0.6663399676277941 0.8485225226132277  
0.9473244934090485 0.1707986234085744 0.3559739980850117  
0.8941783536692000 0.1665649236717369 0.1503257134375493  
0.7225809472833286 0.6630757788749941 0.6493466081559442  
0.7825462382838142 0.3268246664438109 0.1504062194916329  
0.9447726085463223 0.8289861071188412 0.6546198392933879  
0.3346323895646154 0.2545514887216410 0.1878016475363034  
0.4999416329557412 0.7459052384969470 0.6798294470582485  
0.6677108488329726 0.7445117314246138 0.8102532992013418

0.4169161411042679 0.3164726900436661 0.3412743087039870  
0.4526078341752390 0.1633440956774408 0.1338970351280271  
0.6139807482456204 0.6640465664928303 0.6452385718288617  
0.5634036970554899 0.3254614746409254 0.1443517021392378  
0.3879658609027106 0.8300160087569033 0.6528111705033109  
0.4498047939780427 0.8238414060824346 0.8490448611619138  
0.6159150691591067 0.3208714294252197 0.3452300925889273  
0.5546282201298859 0.6648331951444187 0.8412525429006453  
0.3955179478849998 0.1590485917912532 0.3398158846087266  
0.5585647392723327 0.8233084296012187 0.8425465198433449  
0.3317358192753160 0.4057304149810415 0.2451927715886160  
0.4459456044032656 0.6650074581419670 0.8453079744655249  
0.6192514315651183 0.1608365910584451 0.3337121986004733  
0.5619697592927437 0.1663759932055813 0.13314101966088498  
0.3825911016380310 0.6738904390139892 0.6504903812027925  
0.4547618366361128 0.3213991575232780 0.1368948830564559  
0.6142832454423957 0.8229025675955948 0.6399598773282484  
0.0028959731209425 0.2484664376440639 0.1876425815476856  
0.1663818428623338 0.7539889618739425 0.6936059977089153  
0.3346100923424111 0.7519024326649785 0.8223071189685998  
0.1676075859543804 0.2486627348412933 0.3200220031070148  
0.1146499179423976 0.1722576843312277 0.1540686474928550  
0.2739296337507166 0.6787304524239671 0.6612973957922664  
0.2203661350100136 0.3255312583916702 0.1433161103652521  
0.0532911750521980 0.8308238440659532 0.6585130878940900  
0.1120654210653170 0.8318296253303656 0.8565767683775232  
0.264685500410028 0.3381424409121357 0.3520128398546096  
0.2203608163113521 0.6746633461571920 0.8630362368315486  
0.0559639791443335 0.1686777147428292 0.3540156764091199  
0.2207696583652294 0.8319775510100976 0.8593291668621069  
0.0571816945898951 0.3285293538042358 0.3538789476380000  
0.1115885475586633 0.6722306171152093 0.8582755398414988  
0.2867960730188839 0.1761741637117193 0.3558755016172061  
0.2232372368589852 0.1679169888674138 0.1619870840654500  
0.0575303640593433 0.6713086883327359 0.6523779978246489  
0.1121070923492259 0.3305774976871447 0.1535069287505708  
0.2794230083681696 0.8355275594012829 0.6622223163910865  
0.5082792330433207 0.2322223346322756 0.2986340252725917  
0.5142976966160578 0.2551934178239614 0.5884261151198271  
0.1688814508143001 0.1422296536158963 0.1324199412586366  
0.3264826923768969 0.6492794302281346 0.6295518061496812  
0.1664142330599614 0.3567668589668340 0.1241259643662775  
0.3337474275201119 0.8605096220088763 0.6316208278127015  
0.1660195044342633 0.8601118297934335 0.8828425733246650  
0.0028667725797607 0.3578843869269245 0.3769049838996613  
0.1661795591267343 0.6448903009528713 0.8850420052219593  
0.0016194087974478 0.1416069634203781 0.3803938175878744  
0.1680951765911963 0.0700901131170782 0.0665975397063425  
0.3202781092847160 0.5807001822771898 0.5593986287543593  
0.1666957243197877 0.4308412295446326 0.0619932973241266  
0.9994648187744173 0.9311401223442825 0.5664630922684045  
0.1664066098798078 0.9328639618396628 0.9471496321651134  
0.3050882130506649 0.4577702005605822 0.4165060492681869  
0.1663506461464939 0.5709312050785443 0.9476422057585234  
0.0008265826630540 0.0688635741313527 0.4460349860020319  
0.1100579204460931 0.0366192938958483 0.0347631090615106  
0.2634998184849625 0.5384167740524117 0.5597208153080072  
0.2240621177785024 0.4692032184305882 0.0394854546869835  
0.0573139988335898 0.9643679127936764 0.5328517464937017  
0.1091776700901292 0.9692507502301445 0.9760792337066181  
0.2566580052766817 0.4762932961767752 0.4910343323901700  
0.2237822319715900 0.5377978422411079 0.9834650727099614  
0.0579744789707660 0.0317233076013624 0.4738551604263237  
0.2244581462909540 0.9666387726264128 0.9783020580481681  
0.0605018800369234 0.4694106326970379 0.4640352614028946  
0.1090503877797625 0.5325565217127185 0.9706823726569864  
0.2789205312380785 0.0384175088436874 0.4779958305177601  
0.2253267093980662 0.0339721507774313 0.0369829304396045  
0.0608514422510874 0.5369743372935658 0.5226401735010368  
0.1092151267186037 0.4641204467290757 0.0268485426612226  
0.2777692506520564 0.9717001077483680 0.5388564519958521  
0.5080950966058666 0.1371805671082401 0.1087417023854197  
0.6684784140593912 0.6350302483608339 0.6225074739198875  
0.5094996795711925 0.3517397010264683 0.1152965789214056  
0.6689975762232766 0.8510108997134022 0.6166363569266944  
0.5047194489906432 0.8521058940183188 0.8692381314542122  
0.2989784040043803 0.3968306465983708 0.3314995236824154  
0.5006148438870738 0.6365561796783036 0.8676420360911964  
0.3384547123043372 0.1412709440343427 0.3728528386620913  
0.5074263968928088 0.0646369887481094 0.0443469531167123  
0.6684808537015818 0.5615105096026565 0.5583608873453809  
0.5067139359603351 0.4244466308699532 0.0500301711695219  
0.3344288536452789 0.9325795398078992 0.5640823800959500  
0.5058799240371846 0.9259769604406665 0.9302908788637214  
0.6685206206635801 0.4229524822932036 0.4390524013503275  
0.5023167184164113 0.5628321891871784 0.9315081889819535  
0.3370116718360985 0.0686244484536232 0.4397908308551953  
0.4492408633867913 0.0303291214867487 0.0153812453794536  
0.6110303780586072 0.5246279301499653 0.5311760747685240  
0.5632078523886267 0.4611366629902541 0.0171196116639284  
0.3922863327359821 0.9630027938247874 0.5256487654315832  
0.4485421095705924 0.9620755671262321 0.9592877077167232



0.6109702325341398 0.4568202754545136 0.4728872409993404  
0.5609576008180832 0.5288902696940155 0.9592278669016507  
0.3936296392690982 0.0294433500887656 0.4647550952633044  
0.5639598733498261 0.9608388039440285 0.9580879890357334  
0.3621100325131358 0.4996721203068445 0.4174541282653094  
0.4459769601453101 0.5259673752993491 0.9642120270635944  
0.6140365055267624 0.0277411775098323 0.4611271137392126  
0.5648091537523067 0.0290837308719005 0.0143941444832707  
0.3703622885561398 0.5591056663613041 0.4899177604887855  
0.4479789152776972 0.4583062246999493 0.0225019156936236  
0.6130594627175848 0.9603892786023417 0.5201728182677896  
0.8397733905924942 0.1386758928896530 0.1245827519576548  
0.0034735123778303 0.6425783078684756 0.6260664391114767  
0.8369337236843571 0.3554209127605444 0.1254415300758662  
0.9991505589122677 0.8582388203468931 0.6314039913969941  
0.8322349518275329 0.8537175035331714 0.8764808407365261  
0.6695557026876415 0.3501098389816898 0.3734626882394648  
0.8357383448352828 0.6386351731775800 0.8744954653617355  
0.6731662755586402 0.1343511394012540 0.3653007981958595  
0.8382309994302372 0.0652261568532494 0.0606559981250192  
0.0037054479109341 0.5696292317478594 0.5605720594077901  
0.8366159818789793 0.4283484498222944 0.0606709251540854  
0.6700151948916977 0.9240863942791049 0.5513612478979076  
0.8336842213959460 0.9267607152266087 0.9417068774451728  
0.0030843732849137 0.4312858483775419 0.4409519297638594  
0.8360715419972717 0.5660408705889189 0.9403007324024433  
0.6721331336054983 0.0618426863875624 0.4307852128604673  
0.7796605304246570 0.0333215016866249 0.0278085211709243  
0.9462207694569100 0.5317837354847705 0.5367675655328609  
0.8940220332496973 0.4628356885109103 0.0277292313768195  
0.7280684876586716 0.9583971905627863 0.5212178568912967  
0.7774379711440886 0.9656604833811666 0.9696129883030518  
0.9458950688982661 0.4641896005953309 0.4782759860368220  
0.8937183414962019 0.5301970069759522 0.9687550616953267  
0.7291309192261642 0.0257408365162028 0.4621952584574129  
0.8922445555437943 0.9585340430477378 0.9749543301837438  
0.7259889782255100 0.4596970731114567 0.4666813693583270  
0.7786703805920177 0.5317081818942295 0.9736182300460363  
0.9430175625937561 0.0357217877417332 0.4799228582576884  
0.8944826255843199 0.0261974234795264 0.0331668151806160  
0.7259994796073419 0.5273243775767626 0.5250755018812019  
0.7789818974407049 0.4643753426581489 0.0326158318716006  
0.9423260500217046 0.9683542713446351 0.5388955484366096  
0.0035165709979458 0.2339952946607224 0.1110437612289668  
0.1680727678551380 0.7301315694745923 0.6221250780149479  
0.3365759133849009 0.7469105685176614 0.9013422313271924  
0.1685884234740856 0.2765701983092365 0.3884494787932715  
0.0653571084678376 0.0641954582680579 0.0571506739948794  
0.1021114946346255 0.9363967817602351 0.5537068942446801  
0.2130938995730072 0.4426157139465768 0.4931889350231307  
0.2687201788833817 0.5667633694562371 0.9668036153942727  
0.2691530194830543 0.9391970470297463 0.9555488743681442  
0.1053588502296561 0.4455883966816894 0.4345368031949909  
0.0639826576132706 0.5571157173860875 0.9434732349571482  
0.2344385575784506 0.0679200859220213 0.4596924224778082  
0.2706274757029007 0.0596188863045135 0.0607511960620676  
0.1060734159721010 0.5653040665309813 0.5393399013287170  
0.0643242912629672 0.4353018955332618 0.0443649629239637  
0.2322901000901395 0.9492413916752007 0.5680380159856835  
0.2249257083081024 0.5547382910444753 0.6149209582546308  
0.0638492866757134 0.9439265304833344 0.9517221546635339  
0.2690313955705543 0.4451031010336658 0.0681238372933798  
0.1032827622634599 0.0564927834078153 0.4481873964937263  
0.3379460099900532 0.3051534761798899 0.1562110343625123  
0.4987556836818841 0.7585689195840474 0.6025476029606209  
0.6665529887307421 0.7664742616157710 0.8830352842791573  
0.3862916719049130 0.3504891009274047 0.3011334758588696  
0.4045390103716990 0.0578963785863071 0.0376935875714689  
0.4367540471344886 0.9337408219883103 0.5445697627536394  
0.5657564414148412 0.4293255311959766 0.4532195645958990  
0.6052236522526003 0.5566000881518828 0.9346385266618916  
0.6086355152950493 0.9336125811025084 0.9347159708956294  
0.3998424272204587 0.4850289002481775 0.3597251073335704  
0.3999543745564418 0.5510343459824986 0.9433745819388236  
0.5693122578500069 0.0549669475301232 0.4378887298562140  
0.6100570818018094 0.0555837029032623 0.0362907601461875  
0.4149731828553724 0.5908317685828433 0.4915403459097598  
0.4035120657086897 0.4316634756369418 0.0482220608273274  
0.5674945477422573 0.9351169908807772 0.5432823587884583  
0.5658449469918613 0.5497529920004791 0.5567591426059163  
0.4032915922842540 0.9357605945529449 0.9368899252155581  
0.6093054973981062 0.4362844508141786 0.0379649623710335  
0.4391117099326293 0.0518908897617035 0.4359716179905155  
0.6766052171153043 0.2721948489351814 0.1068005858079136  
0.8350396970407745 0.7602153084729244 0.6075564845639745  
0.9997640413204681 0.7291358139806924 0.8939559930354825  
0.8377003047999425 0.2353949401679739 0.3932838145774552  
0.7355031428663259 0.0626425366689637 0.0486824778151628  
0.7728460398316291 0.9314992655646135 0.5449098246897337  
0.9007459947910800 0.4358980908932533 0.4608294346017417  
0.9387612295994332 0.5558087131803227 0.9435635176849281  
0.9364266191576374 0.9292203954863064 0.9542175987791682

0.7711403108200466 0.4344530781120304 0.4411989032090374  
0.7334874763875188 0.5586897256264530 0.9524615239779469  
0.8981740962839533 0.0636040083950047 0.4591846386129196  
0.9404434966466381 0.0495025360495165 0.0583707180691388  
0.7711582460937290 0.5546428448538331 0.5455359338280416  
0.7339500371122110 0.4389415982445180 0.0582489467647614  
0.8969684105979301 0.9438530540250660 0.5648318747350758  
0.9013532201104587 0.5561606609227903 0.5653340086092681  
0.7314712435238550 0.9422921816212786 0.9446063741107007  
0.9392200772375631 0.4360100057995356 0.0492066584648305  
0.7747069105334718 0.0510647684238942 0.4392314044211391  
0.5233746487528547 0.2036786996495441 0.6352922726357400  
0.5162607804034131 0.2431211881329744 0.5004618954906102  
0.4667590212569135 0.2770982844943951 0.6089728166216327  
0.5506785240801962 0.2973458092001421 0.6089135685407729  
0.4325585297913755 0.2419414765264568 0.2493053185596208

Structure TS3 S=4

1.0000000000000000  
20.9172000884999996 0.0000000000000000 0.0000000000000000  
0.0000000000000000 17.8076000213999990 0.0000000000000000  
0.0000000000000000 0.0000000000000000 12.2158002853000003

Al O C H Fe

10 61 97 64 2

Selective dynamics

Direct

0.0854405971000034 0.2494152675999999 0.2543494689000028 F F F  
0.2491757068000027 0.7539128140000031 0.7636610708999996 F F F  
0.2490406938999996 0.2504821133000021 0.2555902825999965 F F F  
0.0835836832999988 0.7516402183999986 0.7573771789000006 F F F  
0.5846638137999989 0.7447841091999976 0.7439999780999997 F F F  
0.4163813225000013 0.7481171653000018 0.7500124130000003 F F F  
0.7585786494000004 0.2460964724999997 0.2512791105000005 F F F  
0.9179052998999992 0.7477821131000013 0.7526490675999966 F F F  
0.9217381966000033 0.2486922144999966 0.2526850217999979 F F F  
0.7517195938999990 0.7446580168000025 0.7518654081999969 F F F  
0.6778184249999981 0.2471559792000022 0.1798097642000016 F F F  
0.8349845273000014 0.7459317321999990 0.6868843879000011 F F F  
0.000351324999975 0.7489865677000012 0.8205865668999976 F F F  
0.8396416861999967 0.2479631164000011 0.3177964424999971 F F F  
0.7868917078999971 0.1677339445000001 0.1506982317999999 F F F  
0.9488608929000009 0.6701602978999972 0.6510834971999984 F F F  
0.8923778907999989 0.3270717313000020 0.1513203575999995 F F F  
0.7242429038999987 0.8217428613999971 0.6474788593000014 F F F  
0.7783292780000011 0.8263873256000025 0.8524581400000031 F F F  
0.9492849327000030 0.3303818460000016 0.3505893689999979 F F F  
0.8906131528000003 0.6669864188000005 0.8507718262000026 F F F  
0.7313421572999985 0.1643063703999985 0.3492100333999986 F F F  
0.8870662144000008 0.8248751458000001 0.8543211762999974 F F F  
0.7284358627000032 0.3248872190999990 0.3533330886999977 F F F  
0.7819486873000017 0.6668247769000004 0.8521120460000020 F F F  
0.9477705798000002 0.1709687565999971 0.3569798608999974 F F F  
0.8953651495000017 0.1666939624999983 0.1509312370000018 F F F  
0.7234777813999997 0.6645504618999993 0.6541131896999985 F F F  
0.7840556955000011 0.3270479976999994 0.1526428780999964 F F F  
0.9448839155000002 0.8290434318999971 0.6553671918000035 F F F  
0.3366001736999991 0.2561632588000009 0.1943377046999970 F F F  
0.5001081727999974 0.7465509577000020 0.6800456685000000 F F F  
0.6677044496000022 0.7454365132999996 0.8135982229999996 F F F  
0.4160958033999975 0.3173826514000027 0.3456530488000027 F F F  
0.4485224979000009 0.1601657212999967 0.1483471618999985 F F F  
0.6148193929000030 0.6653951165000009 0.6476188102000009 F F F  
0.5635093954999988 0.3308900155000032 0.1447785187000008 F F F  
0.3872928401999971 0.8285207934999974 0.6531532233000021 F F F  
0.4489704097999976 0.8242903591999990 0.8485378658999991 F F F  
0.6198672879000000 0.3231170827000014 0.3587913770999975 F F F  
0.5543770470000027 0.6676937128000020 0.8425528451999966 F F F  
0.3876404530999977 0.1583008949000018 0.3478104065000025 F F F  
0.5577830865000024 0.8254771279000011 0.8427342557000017 F F F  
0.3314202190000017 0.4043877155000004 0.2469011705999975 F F F  
0.4456526617999970 0.6667063515999985 0.8447594394000006 F F F  
0.6233388081000015 0.1564774988000011 0.3391080808000027 F F F  
0.5569215049000036 0.1659050812000018 0.1331715788000025 F F F  
0.3822936732000031 0.6731751407999980 0.6509621343999967 F F F  
0.4554536270999989 0.3229659775999991 0.1318931269999979 F F F  
0.6153392890999996 0.8228721028999999 0.6422432708000017 F F F  
0.0034424640000026 0.2484012083999971 0.1879870937999968 F F F  
0.1662501603000024 0.7532667003999975 0.6948205018999971 F F F  
0.3343846624999998 0.7512716772999966 0.8233746435999976 F F F  
0.1665885366999973 0.2486151076000027 0.3211874301999984 F F F  
0.1146696559999967 0.1720107915000000 0.1544648061999965 F F F  
0.2736381994999988 0.6770091303000001 0.6635116491000019 F F F  
0.2206838987999973 0.3253682937999969 0.1459211860000025 F F F  
0.0534085239000035 0.8306461764999966 0.6588040672000020 F F F  
0.1119329181000026 0.8318173751000018 0.8569739575000028 F F F  
0.2644487489000014 0.3368249986000009 0.3541794679999981 F F F  
0.2200357871999969 0.6742117590999968 0.8645669022999982 F F F  
0.0562902742999967 0.1684597056000001 0.3545020338000029 F F F  
0.2206128019999980 0.8314010578000008 0.8606161937999985 F F F  
0.0576420315000021 0.3287251474000001 0.3544759587000001 F F F  
0.1112916383999973 0.6719144193000020 0.8594392712000030 F F F  
0.2798262944000030 0.1723158770999973 0.3572971059000025 F F F

0.2232738466000015 0.1688232763000030 0.1601880958000024 F F F  
0.0576098408999997 0.6713400972000017 0.6530485689999992 F F F  
0.1123161416999992 0.3299921692999987 0.1538153069000003 F F F  
0.2786761577999997 0.8325159615000004 0.6639176858000013 F F F  
0.5097021707289144 0.2334865043275940 0.3108947576212913 T T T  
0.5082806045127413 0.2512166663628221 0.5157794254803321 T T T  
0.1689015358000034 0.1425422992999970 0.1315960928999971 F F F  
0.3262196534000026 0.6481678163999973 0.6308981162000009 F F F  
0.1667651607000025 0.3563340330999978 0.1254211318999978 F F F  
0.3326355702999990 0.8581304232999969 0.6328443948999976 F F F  
0.1659438960000017 0.8599356388000032 0.8833647902999999 F F F  
0.0033855634999966 0.3582478754999983 0.3773136176000023 F F F  
0.1658006919999977 0.6444720666000023 0.8863086714000019 F F F  
0.0019868087000035 0.1415211593999999 0.3811860889000016 F F F  
0.1681570705000013 0.0704436810000004 0.0658060151000015 F F F  
0.3199897981999982 0.5795964598000012 0.5606826825000013 F F F  
0.1668453437999986 0.4303711394000018 0.0629936089000012 F F F  
0.9996123909999994 0.9310715366000011 0.5669734718999990 F F F  
0.1663931824000002 0.9329795139000012 0.9469977074000013 F F F  
0.3047861101999985 0.4565514744000012 0.4180320433999967 F F F  
0.1660672463000026 0.5704979384000026 0.9487113989000022 F F F  
0.0011040577999992 0.0688143340000025 0.4467391634999984 F F F  
0.1101026923999981 0.0370403630999974 0.0339133368999995 F F F  
0.2629939880999999 0.5377482419999993 0.5604019073999993 F F F  
0.2240915822999980 0.4688281028000034 0.0400768980000024 F F F  
0.0574847844999979 0.9641747197999990 0.5332475622000032 F F F  
0.1091939861000029 0.9695752009000032 0.9754920019000011 F F F  
0.2561031687000010 0.4755864048999996 0.4918184419000013 F F F  
0.2236138346999965 0.5374296588000007 0.9840892598000011 F F F  
0.0582156751000014 0.0315506991999968 0.4743325502000033 F F F  
0.2244601972999973 0.9666926939000007 0.9781816176000007 F F F  
0.0608986937999987 0.4696778964000003 0.4647421128999980 F F F  
0.1088553040000022 0.5320423148000017 0.9720123099000020 F F F  
0.2733990246000033 0.0343061573000014 0.4836518401000021 F F F  
0.2253630706999985 0.0341469354000026 0.0365582226000001 F F F  
0.0611365395999997 0.5372252896000020 0.5233574459999986 F F F  
0.1092288582999998 0.4635817208000006 0.0281333786999980 F F F  
0.2741250087999987 0.9674596187999995 0.5437594839999988 F F F  
0.5028758660999983 0.1355247588000026 0.1147612139999978 F F F  
0.6695623736000016 0.6368300270999967 0.6259459767000024 F F F  
0.5083873451999992 0.3552441519000027 0.1134359862999972 F F F  
0.6704530351999978 0.8500340287000014 0.6195447035999990 F F F  
0.5035073339999983 0.8532766590999969 0.8691316206000010 F F F  
0.2986980036999967 0.3953292145999967 0.3334864852999999 F F F  
0.5004092997000029 0.6388898725000018 0.8680349024999998 F F F  
0.3318813242999994 0.1376408737000006 0.3780917224000007 F F F  
0.5024796844000008 0.0640201901999973 0.0482300566999996 F F F  
0.6707306201999970 0.5639523031000024 0.5614705270999991 F F F  
0.5067066610999973 0.4282980811999977 0.0494394537000034 F F F  
0.3318343780999982 0.9297913509999987 0.5660448787999997 F F F  
0.5034362259000034 0.9268906698999970 0.9307641493000034 F F F  
0.6733738988000013 0.4259450269999974 0.4436426067000028 F F F  
0.5021398198000000 0.5658483833000005 0.9315679003000028 F F F  
0.3304799799999998 0.0654664516999972 0.4437388555000013 F F F  
0.4449061542999999 0.0293056793999966 0.0172985580000002 F F F  
0.6137666520999971 0.5268429528000027 0.5327790193000013 F F F  
0.5631831930000004 0.4651561705000020 0.0177813669000031 F F F  
0.3888661546999970 0.9609843522000006 0.5256711919000026 F F F  
0.4454657129999973 0.9617806604999970 0.9592856415999975 F F F  
0.6150681666999986 0.4591139986000030 0.4749563530000032 F F F  
0.5609391469999991 0.5326567382000036 0.9596927719000021 F F F  
0.3881631308999971 0.0274683069999995 0.4653729015999986 F F F  
0.5609381865999978 0.9624233461999978 0.9600307608999969 F F F  
0.3619779073000018 0.4981426291000020 0.4194501400999968 F F F  
0.4456594987999978 0.5289363791000028 0.9632610114000002 F F F  
0.6184873286999988 0.0258565504000003 0.4620476220000000 F F F  
0.5605331359999965 0.0300143239999997 0.0178133730000027 F F F  
0.3702252890999986 0.5576168384000013 0.4918424911000017 F F F  
0.4478416620000019 0.4613432420999999 0.0212559833000014 F F F  
0.6162365160000007 0.9587573089999992 0.5210438269999997 F F F  
0.8408889971000022 0.1386862738999994 0.1258857531000004 F F F  
0.0035607631999994 0.6427055905000003 0.6265584726999975 F F F  
0.8382557070000018 0.3555137482999982 0.1265440764000019 F F F  
0.9992725653999983 0.8581653337000006 0.6319114036000002 F F F  
0.8329918211000020 0.8538748336000026 0.8783498232999989 F F F  
0.6743068618999999 0.3525639433999999 0.3803584759999978 F F F  
0.8363651863000001 0.6387262896000010 0.8765984383000003 F F F  
0.6779640901999997 0.1320410714000033 0.3693456216999991 F F F  
0.8391950293000008 0.0654021001999965 0.0616910753999989 F F F  
0.0038927927000003 0.5699262850000011 0.5607603878000020 F F F  
0.8376841553000034 0.4282253667999996 0.0615482342000035 F F F  
0.6726946913999967 0.9223431448000028 0.5538831296999973 F F F  
0.8344971224999966 0.9270222238000017 0.9429862619999980 F F F  
0.0035139041999983 0.4316659596999983 0.4411648624000009 F F F  
0.8368174928000016 0.5659188147999998 0.9416587536999970 F F F  
0.6772501267000024 0.0593162500999966 0.4339358821999966 F F F  
0.7805570334000009 0.0336120373999975 0.0289668599000024 F F F  
0.9464363132000031 0.5322488536000023 0.5363022236000035 F F F  
0.8950260737000022 0.4628727628999982 0.0287157893000014 F F F  
0.7314249606000018 0.9556486432000000 0.5255249245999991 F F F  
0.7782565162000026 0.9659395082999964 0.9708455964999985 F F F  
0.9462247853999983 0.4646688300000008 0.4778151435000026 F F F

0.8945645889000033 0.5302683119999969 0.9699144329999996 F F F  
 0.7337464591999989 0.0229174469000029 0.4665863880000032 F F F  
 0.8931126498999973 0.9587624177000009 0.9758429102000008 F F F  
 0.7303265083999975 0.4631922798999994 0.4718854552000025 F F F  
 0.7794629583000017 0.5313253724999996 0.9745970028000031 F F F  
 0.9432651370999992 0.0358086119999967 0.4807097238999987 F F F  
 0.8954258575000011 0.0264196906000009 0.0339830356999968 F F F  
 0.7289992576000017 0.5308515637999989 0.5299038643999978 F F F  
 0.7799271533000010 0.4639386775000034 0.0334072945000017 F F F  
 0.9425045204000000 0.9684145696000002 0.5395897828000003 F F F  
 0.0039151770000032 0.2338922475000018 0.1114140098000007 F F F  
 0.1679891556999991 0.7303382901000006 0.6227178713999990 F F F  
 0.3369093033999988 0.7475410357000030 0.9024894846999985 F F F  
 0.1672934541999993 0.2756755182000035 0.3902969250000012 F F F  
 0.0654126017999985 0.0647101531000018 0.0561101521999987 F F F  
 0.1022477540999986 0.9360857084000003 0.5539411025999996 F F F  
 0.2123008833999975 0.4423336430999996 0.4934582352999968 F F F  
 0.2684806402999982 0.5664506072999984 0.9671102402000002 F F F  
 0.2691278639000032 0.9390590965000030 0.9557793194000013 F F F  
 0.1057928232999998 0.4457370175000008 0.4356270799000015 F F F  
 0.0637179982999996 0.5565891513000025 0.9450617824999981 F F F  
 0.2284638889999968 0.0632901561000025 0.4669767039000021 F F F  
 0.2706648778000016 0.0596782872000006 0.0605706891999986 F F F  
 0.1063232655000022 0.5654926731000032 0.5405355879000027 F F F  
 0.0643609974000015 0.4347752595000003 0.0458553623999975 F F F  
 0.2296546653999982 0.9435898488000021 0.5748416401999989 F F F  
 0.2242876039000024 0.5545244986999975 0.6150368766000014 F F F  
 0.0638657378000005 0.9442864690999997 0.9510723391000013 F F F  
 0.2691607400999985 0.4447716019000012 0.0682878463999970 F F F  
 0.1035216805999966 0.0562441193999987 0.4485097941999996 F F F  
 0.3378819480000033 0.3088419803999969 0.1684086623000027 F F F  
 0.4990905451999978 0.7584027543000005 0.6025027128000033 F F F  
 0.6661884809999989 0.7657346340999993 0.8873446953000013 F F F  
 0.3899606396999999 0.3553974157999988 0.3044900683999998 F F F  
 0.3997603263999991 0.0559235372000018 0.0395007193000012 F F F  
 0.4339120498000000 0.9323200652000025 0.5424909114000016 F F F  
 0.5704380251999979 0.4312005239000030 0.4529258796000022 F F F  
 0.6050184838000021 0.5607456592999966 0.9351652797000014 F F F  
 0.6060697221999973 0.9361449087000011 0.9368538200000032 F F F  
 0.3999057782000008 0.4833822379999972 0.3621651471000007 F F F  
 0.3997244075999973 0.5538867998999990 0.9415817126999997 F F F  
 0.5743474483999975 0.0534189839000021 0.4365915663999971 F F F  
 0.6053038209999997 0.0572059320999969 0.0407517898999998 F F F  
 0.4149564376999990 0.5890922860999979 0.4939608904999986 F F F  
 0.4036985134000020 0.4336244061000016 0.0462922227000035 F F F  
 0.5703372712000032 0.9337633560000000 0.5428200128000000 F F F  
 0.5681879649999991 0.5516843600999977 0.5568323907999968 F F F  
 0.4007433598999981 0.9349408110999988 0.9352214156999992 F F F  
 0.6090985797999977 0.4402404348000033 0.0395574734999968 F F F  
 0.4326150622000000 0.0510441492000027 0.4337802400999990 F F F  
 0.6780121863999966 0.2795710585999984 0.1155487694000001 F F F  
 0.8347665574999965 0.7598726404999994 0.6100564664999979 F F F  
 0.9999588291000023 0.7298082113999982 0.8950093974999973 F F F  
 0.8400878731999981 0.2322908995000006 0.3938918436000023 F F F  
 0.7364370446000024 0.0629983664999969 0.0498919014999970 F F F  
 0.7755493975000007 0.9279714516000013 0.5507936591000018 F F F  
 0.9011280986999992 0.4364238048000004 0.4598397982000009 F F F  
 0.9395154377999972 0.5561180329000024 0.9447838055999966 F F F  
 0.9372151868999978 0.9293582354999970 0.9548898736000027 F F F  
 0.7758073776000032 0.4382754251999970 0.4474562954000021 F F F  
 0.7342206932000011 0.5581354862000012 0.9533520573999965 F F F  
 0.8984739305999980 0.0638383956000013 0.4600709093000006 F F F  
 0.9414072750999978 0.0497250923000010 0.0590389883000029 F F F  
 0.7735146791000034 0.5590711482999993 0.5517030562999992 F F F  
 0.7349327546000026 0.4383080631000027 0.0588120135999972 F F F  
 0.8971320719000033 0.9439942452000025 0.5655929655999969 F F F  
 0.9015266326000031 0.5567611536000001 0.5644091683999974 F F F  
 0.7322784018999968 0.9425437813000030 0.9459245680999970 F F F  
 0.9402636342000008 0.4361728893999981 0.0502516127999968 F F F  
 0.7797002307000014 0.0477965302999976 0.4448548394000014 F F F  
 0.5177045150243700 0.1941168641557596 0.5442482160404580 T T T  
 0.5080391018878103 0.2429613090080025 0.4072264307417370 T T T  
 0.4604362321844135 0.2735157585866119 0.5304975406393453 T T T  
 0.5478999609277153 0.2909501539285770 0.5227379714419200 T T T  
 0.4250135980179977 0.2411634098323745 0.2528827530292759 T T T  
 0.5913078656609656 0.2435437228089228 0.2432039799508985 T T T

Structure TS3 monomeric Fe S=3/2

1.0000000000000000  
 20.9172000884999996 0.0000000000000000 0.0000000000000000  
 0.0000000000000000 17.8076000213999990 0.0000000000000000  
 0.0000000000000000 0.0000000000000000 12.2158002853000003

Al O C H Fe  
 11 61 97 64 1

Selective dynamics

Direct

0.0851537075067625 0.2493717495875529 0.2542986332058277 F F F  
 0.2494933627112701 0.7547638532148824 0.7635003458411518 F F F  
 0.2496072069533000 0.2523161101269906 0.2533766941588667 F F F  
 0.0837064127769764 0.7517289729772827 0.7570793002625251 F F F  
 0.5848049645607674 0.7439732734607460 0.7439191577337709 F F F  
 0.4168971971733484 0.7483321561042899 0.7520178816086727 F F F

0.7563806377959281 0.2460371671525436 0.2485350576042222 F F F  
0.9178272926997195 0.7476702878902302 0.7518645223306564 F F F  
0.9206358561075163 0.2486903333234096 0.2521869578553506 F F F  
0.7514797491344538 0.7443074930805835 0.7488142392622734 F F F  
0.5932513829894345 0.2422845780621665 0.2454472432172258 T T T  
0.6741525898652156 0.2458862715823500 0.1801032710021175 F F F  
0.8347814308543633 0.7458770837536974 0.6848701975099019 F F F  
0.0003483503452344 0.7489551346709433 0.8201498341329128 F F F  
0.8379381656488292 0.2477636554117240 0.3160235927918080 F F F  
0.7856578594675057 0.1682338078075034 0.1476892547909543 F F F  
0.9489752800210169 0.6700523660847963 0.6507787299484420 F F F  
0.8909938956620067 0.3271549196607779 0.1511095746826996 F F F  
0.7234518461585893 0.8223528273945959 0.6446823604808003 F F F  
0.7779966323560643 0.8262851496728274 0.8503270228257449 F F F  
0.9485940032887470 0.3302372810547638 0.3503011510439933 F F F  
0.8903187862363353 0.6670108475428336 0.8497888024546754 F F F  
0.7292061100419502 0.1643129496477371 0.3462310901560457 F F F  
0.8867257835107267 0.8247633336675406 0.8531811517630743 F F F  
0.7255550679323832 0.3235006931664302 0.3511810066102186 F F F  
0.7816703191265120 0.6664440343370046 0.8493820932891438 F F F  
0.9469518009062199 0.1707754792867746 0.3563477388806149 F F F  
0.8942191157236508 0.1666743175826610 0.1501606530795954 F F F  
0.7226880622401666 0.6632959209060090 0.6509421515472624 F F F  
0.7825297691753406 0.3269436202229485 0.1507682572910056 F F F  
0.9449220191315746 0.8288178638235522 0.6547532451724862 F F F  
0.3342180565576740 0.2542891659560809 0.1906141368040366 F F F  
0.5001661032425702 0.7462147521397355 0.6817066815789445 F F F  
0.6679109617826668 0.7448829192525253 0.8116910979672340 F F F  
0.4149466428165240 0.3158108894260465 0.3489811961106142 F F F  
0.4522130042189971 0.1628330306408685 0.1437802611222097 F F F  
0.6140695553920636 0.6644189331870791 0.6466840771991329 F F F  
0.5635173937385218 0.3256347670837130 0.1500342546473590 F F F  
0.3881082248820746 0.8293911412131862 0.6541813553608264 F F F  
0.4500013789061228 0.8249665985754362 0.8505905846460067 F F F  
0.6170099837083285 0.3210045743671941 0.3496536998054580 F F F  
0.5550449714462573 0.6655638428982300 0.8433113664372272 F F F  
0.3933410720672299 0.1595511035462209 0.3445934673869573 F F F  
0.5587304849056522 0.8245756641794770 0.8441446068112697 F F F  
0.3315029424920439 0.4052303959359591 0.2471845888255046 F F F  
0.4464119811125613 0.6656208907775607 0.8476086687817173 F F F  
0.6210283372670631 0.1608092145321720 0.3380426776365226 F F F  
0.5611023126340555 0.1671879050915166 0.1418145736665437 F F F  
0.3828771666049917 0.6733888097990430 0.6526882305477244 F F F  
0.4550623117669801 0.3223077495788331 0.1437809651631099 F F F  
0.6145765845921787 0.8230956492971231 0.6413895795925697 F F F  
0.0027087545565649 0.2484016190759988 0.1878491748012578 F F F  
0.1665700256512821 0.7537749182749920 0.6944855776016041 F F F  
0.3348388784149705 0.7518571233257774 0.8241803810500770 F F F  
0.1669866517949359 0.2485923244379151 0.3207119532612737 F F F  
0.1143056305549095 0.1721161589004012 0.1544868940567241 F F F  
0.2742085059258201 0.6783913331811391 0.6632203502756298 F F F  
0.2199615769964112 0.3255648919009460 0.1444198984086569 F F F  
0.0534480096907970 0.8307474419638865 0.6586624409951369 F F F  
0.1120915185929050 0.8318112593020359 0.8569415938899851 F F F  
0.2637489343014821 0.3381262338592990 0.3534255205373213 F F F  
0.2203454987880846 0.6744827883121260 0.8642356839895911 F F F  
0.0555723058473916 0.1685039127036561 0.3542149537300503 F F F  
0.2207865802124616 0.8317093779705331 0.8605786242855871 F F F  
0.0570193867224802 0.3283465941286892 0.3544401637700929 F F F  
0.1115852841140992 0.6721506479263368 0.8589200250372926 F F F  
0.2845312254004071 0.1749606961053374 0.3575264319307507 F F F  
0.2228784324693649 0.1679409478565645 0.1625864737547715 F F F  
0.0577382785001888 0.6712099072901339 0.6528086219100757 F F F  
0.1116710425965834 0.3304305508547074 0.1539189768606519 F F F  
0.2795262672159282 0.8344847419303179 0.6639305383116962 F F F  
0.5100899207860303 0.2333793404078054 0.3154012671943490 T T T  
0.5131373034869310 0.2541080570365312 0.5244358329070600 T T T  
0.1685917433263455 0.1421550825128506 0.1329848875688597 F F F  
0.3267537735974742 0.6489119890490045 0.6315139365379423 F F F  
0.1660190119402145 0.3566759863523856 0.1248642629179244 F F F  
0.3337491074765069 0.8595654851502559 0.6331352409542745 F F F  
0.1660200243182288 0.8599823416809329 0.8836082730135146 F F F  
0.0027560375232412 0.3579027183368311 0.3772243393561823 F F F  
0.1660975954603998 0.6447281615111962 0.8859019761332050 F F F  
0.0012427237291206 0.1414976582828871 0.3806619919283136 F F F  
0.1678965643772514 0.0699711126816567 0.0672618812725787 F F F  
0.3203076796141389 0.5804421199862873 0.5611618607625530 F F F  
0.166311145558176 0.4307105864069669 0.0626514537295151 F F F  
0.9994853250058355 0.9310017188288242 0.5665991592018855 F F F  
0.1663621104332833 0.9327496629586278 0.9478406219647013 F F F  
0.304626323350657 0.4575297130356049 0.4182077110218430 F F F  
0.1661690974478844 0.5707579927612372 0.9483451328839507 F F F  
0.0005241743326820 0.0687391646973978 0.4462374018857176 F F F  
0.1098996655976094 0.0364133662364665 0.0354304545252475 F F F  
0.2632860688159653 0.5386013670255068 0.5611752519857305 F F F  
0.2237398283139456 0.4688895492095639 0.0400314866825937 F F F  
0.0572551630769027 0.9643915148648716 0.5329567564053335 F F F  
0.1090960325126957 0.9690522461756572 0.9767380441878473 F F F  
0.2561836250881342 0.4765033478103788 0.4924969304014795 F F F  
0.2235687225678973 0.5374767851002673 0.9840209507198026 F F F  
0.0577548900011138 0.0317544861216135 0.4739845965581111 F F F  
0.2243809920029776 0.9665829789556284 0.9790462329104628 F F F

0.0605582509806197 0.4690266116966839 0.4650182347642229 F F F  
0.1088003614352075 0.5325387621469559 0.9714089059579507 F F F  
0.2772168565366755 0.0368944279824248 0.4808543921185517 F F F  
0.2251715002158079 0.0339215525701491 0.0377216415072326 F F F  
0.0610050588495383 0.5365898041640946 0.5236144091385455 F F F  
0.1088607007726452 0.4641071324388477 0.0275717757556890 F F F  
0.2768606360318699 0.9701229663774669 0.5415710016039128 F F F  
0.5074621689864429 0.1375097748042009 0.1165766412847375 F F F  
0.6685633609831143 0.6354325976444954 0.6239708500434133 F F F  
0.5095000792188102 0.3521891385673186 0.12082679688590206 F F F  
0.6694240468766424 0.8507143681616469 0.6178001634024568 F F F  
0.5048648087741299 0.8533527565920025 0.8709567257629587 F F F  
0.2984465204706481 0.3965140784383507 0.3331599311130660 F F F  
0.5011056961151326 0.6371709714759959 0.8699539269089414 F F F  
0.3362183320696417 0.1404022659412263 0.3755779853832308 F F F  
0.5071952451555930 0.0657149953576379 0.0494004630676130 F F F  
0.6687903518015332 0.5620538486203372 0.5596260607369601 F F F  
0.5072570380727512 0.4248869645383309 0.0538492227109160 F F F  
0.3338899657010259 0.9314433489413148 0.5655504486290610 F F F  
0.5059373080727170 0.9273011925217602 0.9325527867887473 F F F  
0.6696060208253130 0.4236654862793117 0.4404559600387117 F F F  
0.5028753684729494 0.5634868465816183 0.9340509472907428 F F F  
0.3349106373104149 0.0674832480708645 0.4415183778303913 F F F  
0.4491812594980615 0.0312812164642793 0.0191930259427622 F F F  
0.6114706501890410 0.5253900757271737 0.5312050983067067 F F F  
0.5636645732934014 0.4618220732227769 0.0205173192824972 F F F  
0.3913332664165523 0.9620926297512185 0.5258786823768418 F F F  
0.4486191311397647 0.9633645445693588 0.9619307028184565 F F F  
0.6118187512022502 0.4576765687126567 0.4728012767936818 F F F  
0.5614354831507242 0.5294927819427571 0.9621029856577792 F F F  
0.391855559416177 0.0285463023425550 0.4650552154680128 F F F  
0.5638576039684509 0.9623433160848478 0.9610556864990016 F F F  
0.3617874025618590 0.4991754503387469 0.4192276138834785 F F F  
0.4466155570481689 0.5265034269684037 0.9668461807967148 F F F  
0.6158119624674399 0.0271294409722387 0.4608828821723563 F F F  
0.5645498864485816 0.0302793863921167 0.0184998928125850 F F F  
0.3702943104312979 0.5585542417110716 0.4917047815199425 F F F  
0.4486395987457357 0.4588942797249231 0.0255038947563548 F F F  
0.6142315322479206 0.9598455411208207 0.5199134505777039 F F F  
0.8398069125921452 0.1389114297316638 0.1242286178522889 F F F  
0.0036785506821815 0.6425088680796947 0.6264379328614496 F F F  
0.8369237848282509 0.3554768906415333 0.1257150337691542 F F F  
0.9992910644464459 0.8581062226614193 0.6315413009916213 F F F  
0.8325727103572760 0.8537352102956532 0.8768632648953343 F F F  
0.6708572491821982 0.3507016928693432 0.3756021376724732 F F F  
0.8360085007047289 0.6386284428550582 0.8750203820247080 F F F  
0.6751792814746977 0.1339989495354317 0.3673923890972901 F F F  
0.8383552049169438 0.0654141642448067 0.0603845328467258 F F F  
0.0038654544945729 0.5695768256182632 0.5609467997765307 F F F  
0.8366934026291730 0.4283502692234293 0.0608898853717790 F F F  
0.6709248499875642 0.9233530097238183 0.5523110500494539 F F F  
0.8339755107501503 0.9268469463904978 0.9417963979522312 F F F  
0.0030575637114580 0.4312619592359113 0.4413422091586270 F F F  
0.8363001594191104 0.5660161613011709 0.9406529511908772 F F F  
0.6741804496800796 0.0611692994660302 0.4319618993424612 F F F  
0.7798254894836916 0.0333985342433607 0.0276001221590505 F F F  
0.9463000242267370 0.5320756803310545 0.5365696690448587 F F F  
0.8941542149091148 0.4628319591199457 0.0282137822494875 F F F  
0.7292656640657356 0.9575964347695489 0.5232296631410733 F F F  
0.7776761714612874 0.9656745998708587 0.9695797065621647 F F F  
0.9458777644589702 0.4644864727861346 0.4780847788241545 F F F  
0.8939240148493042 0.5301963003784849 0.9692643628898452 F F F  
0.7309166984684055 0.0249397009576029 0.4642622854429561 F F F  
0.8925049892282786 0.9587291530403306 0.9749270501325284 F F F  
0.7269076399458001 0.4602679941838304 0.4690650264907248 F F F  
0.7788480832015239 0.5316740765378327 0.9736747126623655 F F F  
0.9427973114575110 0.0354335305082500 0.4801422956262655 F F F  
0.8946607071847410 0.0264517328412310 0.0329897488010715 F F F  
0.7265198077197610 0.5278909260369176 0.5273867311376961 F F F  
0.7790832668009031 0.4643296341125023 0.0326168315735913 F F F  
0.9422628081119200 0.9680573732542257 0.5390840542422168 F F F  
0.0033146924301164 0.2331830210441126 0.1115564779020062 F F F  
0.1684242231062356 0.7300025301006059 0.6229567401875684 F F F  
0.3367973416547656 0.7474631117732073 0.9032871274971086 F F F  
0.1677516420371106 0.2770003196472075 0.3887081029612958 F F F  
0.0651683757531103 0.0639094500465944 0.0578307464296799 F F F  
0.1021164235282228 0.9365471250243402 0.5537655453079751 F F F  
0.2123686611781963 0.4432672384832799 0.4944673787603833 F F F  
0.2685580620171351 0.5662993051385570 0.9672548339172664 F F F  
0.2691024837252769 0.9391736795569372 0.9563440192086361 F F F  
0.1053956050004459 0.4449004395665810 0.4359677687796406 F F F  
0.063770565662450 0.5572297789326441 0.9442274738910470 F F F  
0.2323875291556021 0.0660058840430651 0.4637792975247663 F F F  
0.2704379190653157 0.0596262793668600 0.0615668315843934 F F F  
0.1062897613553915 0.5646486604674337 0.5407773020097721 F F F  
0.0639151309883133 0.4354237025843588 0.04514455283356302 F F F  
0.231831838824068 0.9470624118574023 0.5717986475215753 F F F  
0.2247118145387290 0.5552883864358691 0.6161418874546953 F F F  
0.0638086918666261 0.9436388426581033 0.9523663695859739 F F F  
0.2686633363742033 0.4446115609181973 0.0685550624708355 F F F  
0.1029898197987293 0.0566778418005214 0.4482555529486092 F F F  
0.3381370874834460 0.3056141317766006 0.1615450707221555 F F F

0.4988850634360205 0.7585934058482451 0.6043261425844904 F F F  
0.6668972905211135 0.7666286564124078 0.8846150941602602 F F F  
0.3869916697587072 0.3515321089032568 0.3068138873820843 F F F  
0.4042842295187725 0.0583951521750734 0.0416079204336270 F F F  
0.4360259502612038 0.9329702244353726 0.5437346345370457 F F F  
0.5667081821632607 0.4305528117511415 0.4514151401328164 F F F  
0.6056716428884599 0.5572399156961723 0.9373487549499444 F F F  
0.6086530697844665 0.9354131475099763 0.9375506845009340 F F F  
0.3993866039543406 0.4844483599881926 0.3612933504461964 F F F  
0.4006224529150089 0.5515806822566560 0.9457575004437047 F F F  
0.5713660435440460 0.0543701111127817 0.4361713221510399 F F F  
0.6098713704027858 0.0564973389172039 0.0407212825347045 F F F  
0.4150163367329398 0.5900593968110428 0.4933337432338760 F F F  
0.4040633243487974 0.4324099537149522 0.0510330494209299 F F F  
0.5684697154486926 0.9346371342121813 0.5419963890358872 F F F  
0.5661338538136746 0.5506181491045083 0.5557688162639352 F F F  
0.4033774219463169 0.9371670027628412 0.93908055580576824 F F F  
0.6099410019737945 0.4374344858084172 0.0413998711976404 F F F  
0.4369714417970272 0.0511988412249309 0.4349642718821656 F F F  
0.6751016267496652 0.2704214702618586 0.1090855485538214 F F F  
0.8350362777181246 0.7610029216084939 0.6085064647542637 F F F  
0.9999135653588169 0.7294487538751468 0.8943977992403447 F F F  
0.8379707890499333 0.230989831259301 0.3916438908108120 F F F  
0.7356486492079668 0.0626864207818230 0.0484405001392432 F F F  
0.7737633677487352 0.9304589050871499 0.5478541229652194 F F F  
0.9006827707576335 0.4364379753609597 0.4601640009507264 F F F  
0.9389856800533352 0.5558396652842532 0.9442414708580458 F F F  
0.9367031976743334 0.9294311776540169 0.9542275119229515 F F F  
0.7721534220407946 0.4348668409916456 0.4444095612774319 F F F  
0.7336997022603953 0.5586604677639073 0.9523308109900270 F F F  
0.8978945259895639 0.0631888566035244 0.4594330883954285 F F F  
0.9405959756941513 0.0498433520014885 0.0581561081059689 F F F  
0.7715200242198250 0.5552350667485442 0.5486858737038105 F F F  
0.7340356730827438 0.4388370704657945 0.0580364876436406 F F F  
0.8969690871548863 0.9434152270461027 0.5650491659985235 F F F  
0.9014537103370230 0.5567531714660561 0.5646763062811075 F F F  
0.7317444801003106 0.9421804869327559 0.9446378991067945 F F F  
0.9393280888273310 0.4360224315650072 0.0498800888540814 F F F  
0.7767216199971472 0.0500815484417458 0.4422047634022093 F F F  
0.5221980830787167 0.1974170483322843 0.5548169003628984 T T T  
0.5109400308179077 0.2435583866615835 0.4095218738584750 T T T  
0.4652213093930965 0.2765511875043149 0.5383029638757294 T T T  
0.5524820001949460 0.2939842356052441 0.5326116623884675 T T T  
0.4300190688618997 0.2415860641978604 0.2569961621437338 T T T

Structure 4 S=5

1.0000000000000000  
20.9172000884999996 0.0000000000000000 0.0000000000000000  
0.0000000000000000 17.8076000213999990 0.0000000000000000  
0.0000000000000000 0.0000000000000000 12.2158002853000003

Al O C H Fe  
10 61 97 64 2

Direct

0.0850854277762707 0.2493798297595546 0.2545115049747011  
0.2490627404838932 0.7536581336664412 0.7644055814662067  
0.2478242380497022 0.250260042611467 0.2558503668664684  
0.0833512408368478 0.7519252917584538 0.7575516281756691  
0.5845893768999062 0.7446203426324729 0.7422309814769790  
0.4162942585288363 0.7478521290560352 0.7497174650486400  
0.7596287448494579 0.2454603373386917 0.2505710550029292  
0.9176184369090450 0.7478365319639479 0.7522376421395620  
0.9221234232948774 0.2489193275219463 0.2537480989640173  
0.7514711644135801 0.7445093202201960 0.7506040972909744  
0.6805820559357869 0.2467223961631291 0.1745509247126478  
0.8346904888750828 0.7458364655804743 0.6860802639353665  
0.0000809609668480 0.7493247432050580 0.8202897475004818  
0.8401119741510641 0.2481422579811863 0.3183376269618066  
0.7883832115040974 0.1672009725332018 0.1506814312046032  
0.9488170209061479 0.6706550635998596 0.6505913416441089  
0.8934115003294423 0.3273482084189894 0.1517224991201687  
0.7239560614444827 0.8219485365061132 0.6465370002494026  
0.7781439258139997 0.8263856256402917 0.8520159559430880  
0.9493469916603132 0.3307993790191830 0.3515223098373212  
0.8903820337785220 0.6671172095544478 0.8504785009923808  
0.7322382612330074 0.1643080521016458 0.3485409505569237  
0.8868614874486909 0.8245766073064900 0.8538507586159838  
0.7275343748353862 0.3237520753332106 0.3521529721949932  
0.7817134077585663 0.6666403993697188 0.8514593544099895  
0.9480041913912771 0.1717675998145225 0.3589042067957351  
0.8967267442049121 0.1663552355087390 0.1516149928747978  
0.7233101708473697 0.6640341072923022 0.6524074794859374  
0.7851942734234854 0.3268451894177673 0.1525372193701386  
0.9445563020637309 0.8291105145474162 0.6548815555280854  
0.3354845265802169 0.2583414695616852 0.1918297293767850  
0.4998800025567078 0.7462985127283375 0.6788319591020979  
0.6676551733324985 0.7453629873184724 0.8118788314687890  
0.4167308374384575 0.3114863485347712 0.3445698550218665  
0.4473674110860770 0.1613708595501109 0.1381600485577437  
0.6146672080843203 0.6649165812895816 0.6461034468554701  
0.5641586707823123 0.3299768055845931 0.1393150299109607  
0.3866495994245227 0.8281399854637002 0.6524130303807425  
0.4486555044634528 0.8234974415317069 0.8476963646143503

0.6189219609156709 0.3223088918840844 0.3541906670115793  
0.5549992979579343 0.6682303786200023 0.8417065896189371  
0.3847955939255598 0.1527621822698038 0.3354944266353073  
0.5575125282916673 0.8248182384820453 0.8413321427811695  
0.3328090296488426 0.4028437022823326 0.2494200549828705  
0.4462620743771382 0.6673155448803172 0.8452662041138552  
0.624622006557431 0.1555007283519956 0.3328624091216241  
0.5561051086710620 0.1664514246388435 0.1255129665164816  
0.3824829977192437 0.6725715743412053 0.6519574472289307  
0.4558569693945671 0.3235165333041934 0.1277102470202109  
0.6150831699801529 0.8227836124770960 0.6405233085874542  
0.0034355941851132 0.2482634842112788 0.1887589395649059  
0.1661615300218529 0.7532166076300655 0.6955216680185998  
0.3342704139510744 0.7512220609097682 0.8236726918858253  
0.1658667584849027 0.2485233379041389 0.3214566794457312  
0.1144750544061495 0.1721480203910488 0.1540629011083610  
0.2738383509645743 0.6763187369412336 0.6646392460141044  
0.2200975382074830 0.3257217781007711 0.1472873885441857  
0.0531160075154347 0.8307005824166325 0.6585287139114939  
0.1117226507779492 0.8323168175267739 0.8567015380494922  
0.2645823646286871 0.3359943633825324 0.3552293595170610  
0.2196291655348688 0.6743800251542282 0.8656764927087366  
0.0564477945177018 0.1685656529148503 0.3550407950682413  
0.2204217979293261 0.8313179063414537 0.8613086388991960  
0.0576795983582414 0.3291849346882785 0.3545297951139403  
0.1108854420223722 0.6723757596366866 0.8604346675600141  
0.2782962845685972 0.1725541488998061 0.3570336433135353  
0.2230496812497620 0.1693721094820049 0.1592593650452088  
0.0575707823508083 0.6719178176983789 0.6530535832118645  
0.1117377686778340 0.3296065257045484 0.1532846078544523  
0.2780814084641605 0.8320761475635265 0.6641877888703078  
0.5070026737360962 0.2284263996284892 0.3071880976557324  
0.5138029576873180 0.2610281259813618 0.5767036235114915  
0.1686977433213741 0.1429800885461319 0.1305735354021706  
0.3264227215644624 0.6474693156647504 0.6321060527398785  
0.1661619229258591 0.3562882143558994 0.1256123146940809  
0.3319393268084596 0.8577372006195887 0.6325494665690243  
0.1657940246467078 0.8602305763062716 0.8832545738400341  
0.0035039879037626 0.3587682015565079 0.3776974012569099  
0.1653259130075000 0.6447993137504469 0.8873908012098255  
0.0021507679543546 0.1419467126280267 0.3824756792359096  
0.1681145021545518 0.0711678895617922 0.0643148977635022  
0.3204859566160181 0.5786537998547914 0.5622314841116705  
0.1663299998365559 0.4301874111127830 0.0630062089319594  
0.9993911488628342 0.9311613482367846 0.5669047574925301  
0.1663094907062828 0.9335451954639922 0.9461653480119097  
0.3057346715255989 0.4551102873519000 0.4202850800491973  
0.1655223191956878 0.5707087836360785 0.9496711988273674  
0.0012069369373862 0.0692406402683687 0.4478330123958685  
0.1100541238981378 0.0379133107648002 0.0322012909901019  
0.2632530255075380 0.5373116455883249 0.5608165177345157  
0.2235868265734666 0.4686025492337293 0.0400100061567983  
0.0573486402152241 0.9641069964145856 0.5333290504951407  
0.1091184449745981 0.9703420129308356 0.9741115347459939  
0.2565258301059714 0.4749424624189871 0.4925973608518390  
0.2230857119994099 0.5374073925295448 0.9845543566141473  
0.0582510300472592 0.0316805914619636 0.4749660153050791  
0.2244014808938175 0.9672118455036482 0.9772999733481811  
0.0611152219300877 0.4702504694942391 0.4648634765511375  
0.1083170737626418 0.5321969318210549 0.9728713217557186  
0.2717326874781563 0.0335747787643967 0.4832372368434221  
0.2253382349879587 0.0347882887921287 0.0353587724816862  
0.0613454415292338 0.5379155241618250 0.5231877436628736  
0.1087140484171911 0.4635233583328144 0.0284461650605152  
0.2728784424406356 0.9669447258235735 0.5439356665091708  
0.5022987260272487 0.1360943693628158 0.1071089220306405  
0.6693599924341456 0.6361467376216083 0.6246051767829996  
0.5090430802967774 0.3553150054858278 0.1096686672251437  
0.6701827821434847 0.8502957378399500 0.6185085035671065  
0.5032590462966269 0.8522986499734344 0.8682620281680613  
0.2995462151032200 0.3940014252634469 0.3356494642648826  
0.5011162443022243 0.6397515458594185 0.8684129725023766  
0.3298723473131773 0.1355631630295022 0.3732640788717205  
0.5018104319633991 0.0636019880347263 0.0436182207920481  
0.6702804109185792 0.5628337882937018 0.5607322428014001  
0.5076489623333771 0.4291709486163455 0.0481395575618322  
0.3307258604997330 0.9293535594576596 0.5655689685025820  
0.5030587198454626 0.9255814061104743 0.9300000396685206  
0.6723159853774021 0.4244072969542358 0.4428953763199246  
0.5031421475443452 0.5672464851924701 0.9326741040720350  
0.3285409977139864 0.0644688476045019 0.4416159041853192  
0.4442306267674709 0.0286197062397378 0.0136100283607874  
0.6132197421957031 0.5257438475416123 0.5323720825901290  
0.5642091767407109 0.4665406109835075 0.0183648885417114  
0.3874948598311221 0.9606136032891754 0.5242615802832873  
0.4449350988728114 0.9604987125402005 0.9573478441000418  
0.6142098244107856 0.4579149907179954 0.4746090792388387  
0.5620029091038390 0.5344088253089652 0.9612905431936696  
0.3863620957140910 0.0267361919182747 0.4631415034828592  
0.5605608841850582 0.9609257129657323 0.9594596459468363  
0.3632452503185419 0.4960704852170750 0.4229985731490444  
0.4466150719834516 0.5301733069681660 0.9634905623390821



0.6186618210955146 0.0266797380572470 0.4612372539687897  
0.5600037572641270 0.02911171142071676 0.0154548455569099  
0.3712390283943492 0.5558214233852468 0.4950336122363481  
0.4487898645627908 0.4621914256218105 0.0202356787383238  
0.6161713349945188 0.9596078704462343 0.5203880542963830  
0.8423975937743364 0.1382034323707089 0.1260707672344665  
0.0035812187149418 0.6433522448987290 0.6261471728890911  
0.8392696566801590 0.3556209551104956 0.1266484314697891  
0.9989718529718061 0.8581952403994819 0.6315827108593126  
0.8328338554570465 0.8536305445162498 0.8781464592205026  
0.6732443191646453 0.3513880605467747 0.3783071991206128  
0.8361695786403516 0.6388167380408873 0.8764324724582124  
0.6786704691295071 0.1318504436370773 0.3669783437204757  
0.8405340812891637 0.0649870114202216 0.0617930644680484  
0.0040507319172818 0.5707423995620857 0.5601210634539484  
0.8383879918609054 0.4283583362747976 0.0617628374576071  
0.6724863883486734 0.9229761212616623 0.5535720704634102  
0.834777636212683 0.9266029918047352 0.9432339091656132  
0.0037045836956509 0.4323258029470907 0.4411469435755535  
0.8368670030707150 0.5661815162211212 0.9420548389335792  
0.6775475513165432 0.0599176328930895 0.4333600504894051  
0.7816537228249771 0.0335976180548485 0.0295033839244212  
0.9465808519245300 0.5332173363159782 0.5353891842875740  
0.8955528526383176 0.4634359748481671 0.0290674100159620  
0.7313219394948334 0.9564004772604164 0.5260855064488794  
0.7788162427748588 0.9659063532054901 0.9715317927923337  
0.9463807222496499 0.4655321777473560 0.4772266235258513  
0.8947744918309581 0.5308918370344813 0.9704152371782655  
0.7338892473458216 0.0236606716448975 0.4671732823622463  
0.8936502262159749 0.9579140203853171 0.9757512704828528  
0.7293796494069653 0.4614293920396548 0.4714124735484901  
0.7796836425402986 0.5311908925837301 0.9749944856102601  
0.9432835280427838 0.0363826353423917 0.4816377219372967  
0.8964952255484349 0.0255902338414771 0.0338073173832996  
0.7283589123956702 0.5292194320446626 0.5292280731298220  
0.7804626176547700 0.4637361736149259 0.0336651892643260  
0.9423496960218714 0.9687609814524336 0.5399103635671878  
0.0034450995538506 0.2346131652025747 0.1118659115758831  
0.1678991049171898 0.7317611081617699 0.6224870122758190  
0.3371446752202800 0.7488831717396209 0.9028674631283948  
0.1663438221537206 0.2732126199406650 0.3923937468937524  
0.0653983579064388 0.0657515424133024 0.0541324695053049  
0.1020244616846497 0.9357098733138471 0.5536736621724430  
0.2124080348203705 0.4422678257375097 0.4931930587531710  
0.2679753588772584 0.5663834264730312 0.9676090944167939  
0.2690475401494083 0.9393659914621466 0.9553221711037239  
0.1060245930343484 0.4460998741788487 0.4361835501258042  
0.0631400895630989 0.55683393742424718 0.9463215588344696  
0.2265931026941956 0.0623316635128646 0.4673209189927334  
0.2706634982222980 0.0602087036834575 0.0594993970321624  
0.1065372083950535 0.5661284716526822 0.5405671024179028  
0.0638659599928957 0.4346326589991634 0.0460382124131087  
0.2285956129322031 0.9431088985747991 0.5758844541051147  
0.2241794145322515 0.5547528522052261 0.6142191629071263  
0.0637842350373390 0.9450597554892823 0.9497283011949307  
0.2687292499274250 0.4443535235545397 0.0675331972998237  
0.1036226623780152 0.0562313416737794 0.4491971290962908  
0.3361375796854418 0.3133336124108581 0.1756150957799250  
0.4986294983969159 0.7581043360227753 0.6012871774490094  
0.6660473981718198 0.7643282392956152 0.8863569075640712  
0.3915367969677632 0.3522437080107963 0.3080333715337744  
0.3990850598790914 0.0555499203217806 0.0349580458911660  
0.4327036707369629 0.9322282238254047 0.5407677391918142  
0.5693980580077351 0.4302465779534046 0.4530016507322401  
0.6060866357022334 0.5628879306296710 0.9377345879212839  
0.6056826424469435 0.9341123166011371 0.9376048559429435  
0.4016108110441294 0.4807314801060016 0.3668697700062111  
0.4007593227116928 0.5552561308029169 0.9417443554984999  
0.5746524855261512 0.0543753067039532 0.4353842646032149  
0.6046192310192069 0.0565495981890507 0.0386089136317196  
0.4162176777562223 0.5867823192518102 0.4980624219189522  
0.4047314404723608 0.4338672015743015 0.0442089037372213  
0.5701368139464265 0.9347862849305457 0.5417490721467644  
0.5677064943285544 0.5507264342907732 0.5564498304997744  
0.4003304425768235 0.9333406406487512 0.9334487855892561  
0.6100559374552006 0.4416201857778574 0.0406099856031759  
0.4306119433071984 0.0502886960572795 0.4307084974710165  
0.6830481326720914 0.2787656218895549 0.1100294827257713  
0.8345685382794414 0.7598561558238828 0.6092738783050393  
0.9996036318888031 0.7314153628433999 0.8953613717029185  
0.8403628663658935 0.2330568621546334 0.3946985307557327  
0.7377662203193154 0.0633723342167727 0.0506707811103837  
0.7753563457048998 0.9287366118161415 0.5518334370305666  
0.9012621597874499 0.4373764265623237 0.4591427764583855  
0.9396388119909034 0.5569998487313939 0.9454182227725170  
0.9375530175071773 0.9281645767101594 0.9545980085961645  
0.7748274018677037 0.4363447891980385 0.4471558578706620  
0.7342919496638274 0.5576621427320276 0.9537674786985519  
0.8985840384237775 0.0646932856853795 0.4612510412050241  
0.9426697365169474 0.0485417596623066 0.0585508548151452  
0.7730475940704764 0.5571793135306251 0.5507279611371629  
0.735597300607641 0.437779111638771 0.0588620294380107

0.8969169537614619 0.9443633308462651 0.5656521684345250  
0.9016717722175756 0.5579457355850153 0.5630889971848561  
0.7326148349195591 0.9428659692367205 0.9471135381485070  
0.9409161270389461 0.4369911076963362 0.0505065361143053  
0.7799634035684093 0.0485333918387525 0.4461726570803890  
0.5224561607783826 0.2026824006184924 0.5987445625957832  
0.5044648549339712 0.2532175656230606 0.3792389380361669  
0.4649985092515507 0.2817455292270523 0.5698217808187636  
0.5538537688878193 0.2997917784100963 0.5703398175031680  
0.4227121447545912 0.2388080366953531 0.2447154527095279  
0.5936640446555757 0.2428209862302921 0.2369110475088974

Structure 4 monomeric Fe S=5/2

1.0000000000000000  
20.9172000884999996 0.0000000000000000 0.0000000000000000  
0.0000000000000000 17.8076000213999990 0.0000000000000000  
0.0000000000000000 0.0000000000000000 12.2158002853000003

Al O C H Fe  
11 61 97 64 1

Direct

0.0847781606394187 0.2492455229021735 0.2544156257690222  
0.2494445824178739 0.7536227895595280 0.7652920053394523  
0.2486693559802130 0.2500598181757134 0.2567548994347954  
0.0836385902701726 0.7513377411734067 0.7576948383239862  
0.5848614449623241 0.7449969060090492 0.7438110118477299  
0.4169136696265584 0.7482291037527847 0.7529460676361872  
0.7566542107485658 0.2462790375321466 0.2487318820183519  
0.9177781768782174 0.7477557510809956 0.7520019256683489  
0.9205910621448852 0.2487666914811752 0.2519270654609847  
0.7514679747887345 0.7448910750671452 0.7489082777496637  
0.5934257964820832 0.2438237569433649 0.2410415031499565  
0.6750581478507482 0.2464494417791064 0.1782254844735969  
0.8347805862808585 0.7462217965255719 0.6849889584629426  
0.0002935650101995 0.7487164791662030 0.8204511056482834  
0.8381508574757381 0.2480449176135048 0.3161020544963402  
0.7858687858382952 0.1682885132778567 0.1479265553287653  
0.9488630705781652 0.6700799076834366 0.6508119620884963  
0.8912204442165330 0.3273301903094916 0.1508882069454155  
0.7234806780406209 0.8230084034742191 0.6445466831723645  
0.7781245537352938 0.8266262031553534 0.8503143232471106  
0.9485342355585887 0.3302689381259366 0.3501765928367875  
0.8902207844114408 0.6671406896523405 0.8497791095558923  
0.7297266840315296 0.1650267116301093 0.3465002830398242  
0.8868469383009573 0.8248976039089955 0.8533457790870316  
0.7258301566737623 0.3242350735841888 0.3508801149209595  
0.7815754657616176 0.6668211159228039 0.8496308696476608  
0.9468133384551021 0.1706630397551155 0.3561598259044180  
0.8944046345824483 0.1668649153059923 0.1499496076995042  
0.7227580229695520 0.6639675730161964 0.6511857092931863  
0.7828014939395215 0.3271159609876971 0.1508247753758018  
0.9450796404981999 0.8287986407994111 0.6549718212026886  
0.3367776871786438 0.2556857424764570 0.1932856915195598  
0.5000753386184547 0.7468062366698459 0.6818479310272689  
0.6680309513975599 0.7458719757217700 0.8116316238231785  
0.4176968853724628 0.3145326344085276 0.3429100695547578  
0.4522990843077955 0.1608051851147415 0.1473810531052110  
0.6141454753787879 0.6650854132799685 0.6468407421735143  
0.5654039269529685 0.3268476149165955 0.145554086979148  
0.3874913083192428 0.8286934886781397 0.6557539414885090  
0.4499524289348618 0.8252955825365323 0.8511431053648821  
0.6173155612997884 0.3214403745457562 0.3491602850763381  
0.5554786449558713 0.6677109235921779 0.8434484336179233  
0.3874158141932670 0.1566515897806046 0.3448551756602103  
0.5587358676605714 0.8257375505281638 0.8436050490236581  
0.3331793341390660 0.4029589483867266 0.2488953730659528  
0.4468351618081883 0.6666406952030547 0.8479742795581975  
0.6217540533440623 0.1609766457724270 0.3345724687382706  
0.5611635242915666 0.1678577898832464 0.1366372475428179  
0.3828621714281740 0.6728655666969954 0.6533427154520256  
0.4573390259570793 0.3214706773120377 0.1285099262629240  
0.6146080292304004 0.8237706927667459 0.6411778455884393  
0.0027024284203329 0.2484795408158907 0.1875647262683948  
0.1664988759839258 0.7528237076284419 0.6958451079722539  
0.3348791809662990 0.7511125044888108 0.8257472900515548  
0.1660693548109103 0.2486592110428186 0.3218196059598211  
0.1143360976903355 0.1716923807420800 0.1550314073836202  
0.2741719530680225 0.6768407750592567 0.6651286513739277  
0.2209316486411233 0.3250798413558650 0.1472853346031180  
0.0536027989248636 0.8305890072418648 0.6589125699474891  
0.1118979521447756 0.8314483333872343 0.857585114815815  
0.2648149342150167 0.3366802371531327 0.3551412508235141  
0.2202336296268457 0.6739253508544841 0.8657954758674340  
0.0553816013865305 0.1685274494911350 0.3542541161313596  
0.2205753592727105 0.8308945967219823 0.8621506800346035  
0.0569219551865857 0.3285869301810257 0.3539893893395184  
0.1114718850177277 0.6713854631120325 0.8599551706119557  
0.2798303870166289 0.1726868745268559 0.3583321587769141  
0.2229384597462947 0.1684848232593953 0.161365546743516  
0.0576287767964874 0.6709407159338338 0.6533108227492908  
0.1124875785403278 0.3294540407117396 0.1537791403555528  
0.2788943013339814 0.8323000759152839 0.6660008801951816  
0.5124822645177409 0.232825703077716 0.3089931089116816

0.5132097812629867 0.2580117865964848 0.5513549210968781  
0.1685943527143040 0.1421762915915782 0.1325147430667545  
0.3268144159045869 0.6481442553801574 0.6324562267864927  
0.1669961455924934 0.3558827103216208 0.1260479815735948  
0.3328137430463505 0.8581530981768669 0.6350846214513531  
0.1658659862655598 0.8594762521089249 0.8844528317862842  
0.0026409477155089 0.3580457460270619 0.3770063630901079  
0.1659647201597492 0.6440486603960350 0.8870719642344818  
0.0010627548783180 0.1414009597419907 0.3806168993294586  
0.1679610824973484 0.0700178811454209 0.0668691646671134  
0.3204472561042397 0.5799522125781053 0.5611724835802963  
0.1672236579639267 0.4298459182316857 0.0635132382742444  
0.9996137584911717 0.9309069815603336 0.5666706425029761  
0.1662605641570455 0.9325076697552181 0.9481445771145520  
0.3050629507054907 0.4568433081613244 0.4182605266067462  
0.1663246631423228 0.5699817072456009 0.9492882412337982  
0.0004492938356170 0.0686397888667154 0.4461770203435100  
0.1099223902898620 0.0364494094787090 0.0352503949103041  
0.2635385809363022 0.5378933282994508 0.5611358179944658  
0.2244520575747460 0.4683545132057353 0.0406093438620507  
0.0573246966302273 0.9643836295664392 0.5329117286262829  
0.1090428456719044 0.9689702438141630 0.9768666467509376  
0.2565364407400034 0.4757742172676993 0.4924513683218179  
0.2239096239056652 0.5369663742955453 0.9846362439257409  
0.0577298351935564 0.0317338682766045 0.4738861141577860  
0.2243177615853829 0.9663479904563140 0.9791141485788351  
0.0604356347706095 0.4691310272610408 0.4648621375416867  
0.1091580767283697 0.5314095107950118 0.9724507590038861  
0.2731979792392322 0.0341876812691397 0.4851034518264320  
0.2251923491010700 0.0338290699607542 0.0374396408056460  
0.0608698725530724 0.53663744453569984 0.5235859858977566  
0.1095950508971780 0.4629449014500375 0.0285302852093063  
0.2740500095689007 0.9673479710035968 0.5454185207887048  
0.5077715390820979 0.1368775891077325 0.1163181931098354  
0.6686213852922213 0.6360910572343366 0.6242483804973047  
0.5112200882770782 0.3528984689912169 0.1130463382834601  
0.6694731599873167 0.8513833557643622 0.6175900736579690  
0.5047687459494351 0.8538653542114485 0.8710988759234416  
0.2994529986999326 0.3948740670439052 0.3346827198410423  
0.5017945982767664 0.6387481648101012 0.8702194394668302  
0.3318551945531896 0.1373745717472293 0.3778263979321346  
0.5069127498834144 0.0650466163892105 0.0505801969890712  
0.6689426481501772 0.5626583440215097 0.5600168153995160  
0.5099157527878212 0.4268894381980674 0.0506385478869680  
0.3318111013043275 0.9298450698501517 0.5681204549168891  
0.5057389661650163 0.9274937624918127 0.9332778528361356  
0.6699082614720032 0.4241910502124789 0.4407305319929222  
0.5042242408597182 0.5654889515250082 0.9337865345095604  
0.3302309365340821 0.0655817039992180 0.4450558235253305  
0.4488449541443991 0.0307033934593717 0.0210328301667291  
0.6116787138716174 0.5259832759852680 0.5313948298163549  
0.5660299799577717 0.4644713221842578 0.0187501364508445  
0.3887517118295110 0.9613756676028279 0.5279466532027305  
0.4483343681290782 0.9631083323043240 0.9631858654956948  
0.6121410367977949 0.4583009905257611 0.4729221598658851  
0.5632183692467393 0.5323165094073492 0.9611978214770526  
0.3879173060115774 0.0277793687494139 0.4673916729089281  
0.5637196700845030 0.9623914533210054 0.9617474890863427  
0.3619715152342735 0.4990153048376746 0.4188034688300323  
0.4481308180970946 0.5280375488198773 0.9661552237601158  
0.6158748764894002 0.0278340737134873 0.4604656445513794  
0.5643927022001786 0.0300805978141637 0.019493000094493  
0.3703300153574872 0.55848039838363370 0.4912451838765790  
0.4509132352899601 0.4601424722211176 0.0233910591275910  
0.6142742508952714 0.9605663615634821 0.5196217043660299  
0.8399500567174008 0.1390306424603491 0.1242315579712464  
0.0035432999659663 0.6424216063456385 0.6266690676485851  
0.8371231040711147 0.3556632450945705 0.1255873979964277  
0.9994710280655801 0.8580119805414606 0.6317287375687872  
0.8327126809588534 0.8539636661164517 0.8769367192253762  
0.6710778348494282 0.3512451774166311 0.3754474524929781  
0.8358723378950852 0.6388476147384690 0.8750764565959152  
0.6754492400863439 0.1345659132751301 0.3661361287167600  
0.8384717720265678 0.0655603742729093 0.0603993625604345  
0.0037245793865213 0.5695367798940285 0.5610599593115310  
0.8367773412652209 0.4284923192738836 0.0607293399226503  
0.6709465190122793 0.9242089748848423 0.5520372720681923  
0.8341083239870877 0.9270399757712012 0.9418563616426089  
0.0029427581773065 0.4313353881916992 0.4412252535369910  
0.8361969105583782 0.5661695009414437 0.9405659279004138  
0.6742485079507957 0.0618633600035129 0.4314459735282706  
0.7799308864639786 0.03357018111042953 0.0276155469648842  
0.9461722995884932 0.5320028523946932 0.5367281835038552  
0.8941891021713591 0.4630011036666158 0.0278906937365554  
0.7292810274482149 0.9582230028171010 0.5228944897729978  
0.7777925789368713 0.9658511254258481 0.9695945596233770  
0.9457617139473067 0.4644561675006393 0.4781373149560438  
0.8938678469108872 0.5303703902687409 0.9689809439112086  
0.7309348223599854 0.0255691535409501 0.4639167705070271  
0.8926354003109407 0.9589017090620024 0.9749807792502809  
0.7271742269252673 0.4608312970819189 0.4696587465395518  
0.7787908229066307 0.5317657586272792 0.9736756304968113

0.9427755895293581 0.0352384303200462 0.4801409820056496  
0.8947795939103058 0.0266194760176685 0.0330236721836468  
0.7267012726800974 0.5284797695196459 0.5279768947946056  
0.7791137278305315 0.4644096091874063 0.0325971700163215  
0.9423421655125511 0.9678782004523269 0.5391390859485239  
0.0032222478229251 0.2331170384336900 0.1113309985040646  
0.1684761398953525 0.7299005697503519 0.6237552937295686  
0.3370669882650001 0.7451086381639541 0.9046122524923854  
0.1664357224582348 0.2755477976963362 0.3910778161334852  
0.0652167969713274 0.0640072726029446 0.0576385967970007  
0.1022361396096355 0.9366312744009944 0.5536491002522784  
0.2127843349894224 0.4424332090838187 0.4945405026714912  
0.2687621314008582 0.5660158544089728 0.9676442926061822  
0.2690010157723541 0.9388017362416933 0.9565604566249859  
0.1052701254552037 0.4450687816443478 0.4356783316363367  
0.0639968362166852 0.5558655007435761 0.9454600351901499  
0.2280657515639858 0.0627579988377093 0.4683998606964099  
0.2705079824852614 0.0594402027370376 0.0611990229831021  
0.1061373411984178 0.5647367170929343 0.5407462494942727  
0.0647748600740944 0.4340230739620002 0.0461861623749292  
0.2295712956268826 0.9433024949592456 0.5762554361830556  
0.2249666079451028 0.5544192323976647 0.6162095692040982  
0.0637218506924654 0.9435692183478824 0.9526610332620001  
0.2695807626283209 0.4443622533903847 0.0686824436400167  
0.1029364312736174 0.0566896145915706 0.4480816759383540  
0.3375946639117570 0.3084102752794881 0.1674701872651019  
0.4985594167274198 0.7601151616152231 0.6048234012405461  
0.6670166256847430 0.7667224392737766 0.8850943206957000  
0.3903074310374575 0.3529581648814044 0.3043936939853292  
0.4040398663842494 0.0577008592450895 0.0442127064143949  
0.4338919444214708 0.9329909972007745 0.5450036692377717  
0.5670366253544304 0.4313364197680411 0.4511241777458520  
0.6071419160685232 0.5606367872272798 0.9363618890481091  
0.6084930356928947 0.9355888323087360 0.9378658710913609  
0.3996149298574004 0.4846056597397627 0.3607762225102006  
0.4019219194629878 0.5526913436300327 0.9454569519258240  
0.5713887995522368 0.0549739977674086 0.4356664228920569  
0.6095779034290604 0.0565785973955830 0.0418191669738526  
0.4149429951861686 0.5902101801022720 0.4926217674337210  
0.4069163686302392 0.4321511348250218 0.0484718956705405  
0.5685014985480006 0.9353668250984404 0.5417121481871349  
0.5663095157159528 0.5512087508503103 0.5557933847283882  
0.4031395156777419 0.9368855832559003 0.9402574060726300  
0.6122426541256688 0.4398947602280462 0.0396106490060098  
0.4323541575482399 0.0515012942646387 0.4360152304405356  
0.6766123983418900 0.2733465312622015 0.1090538367042892  
0.8350526088047642 0.7608935430818315 0.6084414038499215  
0.9997124737154188 0.7292290378147269 0.8947056057727220  
0.8382073864257694 0.2307156358915119 0.3914581442115050  
0.7357559599518985 0.0628781118593877 0.0484206024469254  
0.7737762974096801 0.9310342154011181 0.5474287519697276  
0.9005818230225391 0.4363579235177252 0.4602666251894841  
0.9388931530560725 0.5560429038660422 0.9438366420393260  
0.9368236366131341 0.9295916636181712 0.9542742259456574  
0.7724941247254823 0.4355134995180932 0.4452227088935102  
0.7335977967584624 0.5586882037582316 0.9524438280083616  
0.8978283982052108 0.0629033410333818 0.4594423687630756  
0.9406958333478291 0.0500423785455575 0.0582109582173174  
0.7716563936927386 0.5558869030111228 0.5494436623139999  
0.7340889071008860 0.4388995705664025 0.0580938624988749  
0.8970701572307894 0.9431934290989267 0.5651237058289160  
0.9013263485151067 0.5566117650696916 0.5649589425309406  
0.7318757194464572 0.9423411991401246 0.9445929859754314  
0.9393859732228138 0.4361971252937520 0.0494287430535738  
0.7767504203896153 0.0506596986178251 0.4418400666633913  
0.5224321798181235 0.1988074141000220 0.5668643837993093  
0.5102193239267686 0.2542584208644226 0.3836648982012560  
0.4642027958491063 0.2784563979903046 0.5472142323543556  
0.5529237112474780 0.2974703118370030 0.5491217095330442  
0.4264722504047870 0.2400595567736147 0.2485141849366731

Structure 5 S=5

1.000000000000000  
20.9172000884999996 0.0000000000000000 0.0000000000000000  
0.0000000000000000 17.8076000213999990 0.0000000000000000  
0.0000000000000000 0.0000000000000000 12.2158002853000003  
Al O C H Fe  
10 61 97 64 2  
Direct  
0.0846913165270090 0.2485684801995224 0.2529064490794181  
0.2491652018598899 0.7550971037426524 0.7655112001057887  
0.2469966071127307 0.2522096191596743 0.2548438078498452  
0.0834597740866301 0.7520613514158525 0.7566056379231416  
0.5849970955689600 0.7435099855659104 0.7420204367618558  
0.4167337147997329 0.7484109907058881 0.7498972817325988  
0.7597731430826381 0.2450924436368565 0.2505011334141023  
0.9178739723378542 0.7463406595338822 0.7513744993626005  
0.9221370184124543 0.2472052272677900 0.2519878909025330  
0.7518176871908261 0.7439543810103193 0.7505840486933436  
0.6805269215891867 0.2442309886196426 0.1780608220885775  
0.8350516252158342 0.7448837874402776 0.6856187020205450  
0.0002765782548311 0.7484177291005775 0.8193994638276664

0.8406158334686522 0.2463834574106210 0.3172263209874865  
0.7879080939266482 0.1664585407045303 0.1488372997893421  
0.9491953189602952 0.6691859051468515 0.6498425051997405  
0.8940593790134103 0.3257517132741964 0.1502350256208823  
0.7243249320972440 0.8216167650399824 0.6471479562858754  
0.7786014392888231 0.8250349297155055 0.8516903402382203  
0.9493146086526264 0.3291513829634305 0.3511362783462135  
0.8906776591058159 0.6656662238959619 0.8497640762977897  
0.7334587611329809 0.1636799349112593 0.3501008237806528  
0.8873195564436357 0.8235528533823608 0.8525788078793615  
0.7293287789724934 0.3240359694356060 0.3518391328946371  
0.7820026544234326 0.6653020444544294 0.8507404685126501  
0.9484014538265972 0.1693646290245217 0.3557525001209465  
0.8963017056555915 0.1650788103185614 0.1495795948037651  
0.7238174021097614 0.6647374703820957 0.6516213997398781  
0.7858294952339041 0.3255529956276587 0.1518509570884713  
0.9449518037458569 0.8275611182219001 0.6532395851798434  
0.3315844200091493 0.2611427478742624 0.1979834049768454  
0.5001289838855849 0.7462504700642124 0.6786985083965559  
0.6679234158295739 0.7441591251319380 0.8120694846165358  
0.4249485392657187 0.3305855917885880 0.3597161163089452  
0.4519531332992363 0.1622967885603705 0.1286310910949894  
0.6151543903319325 0.6648931018560077 0.6454140647611751  
0.5612204301372833 0.3296177361834268 0.1409002572079636  
0.3877930074239458 0.8304620053479450 0.6546731217612038  
0.4499525493029031 0.8220103832488149 0.8497710927339517  
0.6207614306824918 0.3256943882328211 0.3508284478566243  
0.5543396014640182 0.6658839393081567 0.8400716117779156  
0.3866420368827095 0.1625871053873437 0.3480918491935979  
0.5587649983234959 0.8221019433977416 0.8425142670975936  
0.3305134982959909 0.4057012555902631 0.2447684583379783  
0.4455530890832617 0.6660470391831352 0.8434126415055004  
0.6251656527402093 0.1596573844736467 0.3458648613159131  
0.5608428835920463 0.1655349474504367 0.1227889645945386  
0.3819206885634815 0.6752647261062215 0.6491726294902607  
0.4529118268987051 0.3263881710271304 0.1417959548639497  
0.6154249554781707 0.8222670117531540 0.6405272018043179  
0.0033050222363222 0.2467338743086347 0.1871091092317306  
0.1665345719258472 0.7540474087323661 0.6954403956552832  
0.3346594130923340 0.7519671446022943 0.8240800240144946  
0.1654029175930191 0.2493070616452964 0.3207268372348018  
0.1149029675373838 0.1725741541309117 0.1525567347781290  
0.2733283504143092 0.6778465313580914 0.6656060559888851  
0.2178028573596334 0.3263542162844402 0.1453607525379617  
0.0534850016042046 0.8296997055011606 0.6572533487706370  
0.1114832348868961 0.8330621440564649 0.8558401150328786  
0.2618958887549163 0.3410149684838113 0.3531908473138335  
0.21978068856345753 0.6754676702683738 0.8667198863180817  
0.0568233058312233 0.1667044839085531 0.3523219106966164  
0.2201899725496485 0.8319972186031577 0.8617723622604676  
0.0575879426390800 0.3274183852655747 0.3543315434685086  
0.1110452460026927 0.6734210409207938 0.8600277514477298  
0.2786234368469383 0.1743392195477185 0.3605736210960858  
0.2233222316451382 0.1689152596624661 0.1611935241873839  
0.0579839759942133 0.6708981276241774 0.6520957850634002  
0.1095445947845751 0.3301523891600044 0.1515666044327738  
0.2791789236296744 0.8340610131400892 0.6655819684050809  
0.5093923872443729 0.2251435944059834 0.3103579988717446  
0.4165588586245191 0.3235603432047263 0.4759552685117758  
0.1691623220915366 0.1429322941626233 0.1308694405278046  
0.3257314287133989 0.6502652208549724 0.6304181379925420  
0.1639792665028973 0.3569914561664653 0.1240577497410498  
0.3330693141667895 0.8599734075958639 0.6345967211275665  
0.1654141031868364 0.8608749308882283 0.8831249242798573  
0.0034020612185762 0.3570759562035091 0.3774509038898524  
0.1653615930181167 0.6458736992117687 0.8876437351540361  
0.0025929725305728 0.1396852917330822 0.3792947710684080  
0.1684684952266488 0.0711835433731821 0.0646856589550162  
0.3190117461408753 0.5829389636962511 0.5578969432813468  
0.1645313601525724 0.4311265458154523 0.0620914397257676  
0.9997840384882569 0.9292282433016035 0.5641778772617277  
0.1660489256096861 0.9339732188961735 0.9462146669785105  
0.3025723925424251 0.4615403346767611 0.4129360602924124  
0.1650253826971994 0.5717913287034636 0.9495851783412036  
0.0017251321144826 0.0668499653143612 0.4443035395603756  
0.1102186912114081 0.0382797413094053 0.0328067775568502  
0.2646927156114803 0.5367522181994299 0.5651377359204045  
0.2221189815018694 0.4692254279690609 0.0402724945047691  
0.0578209212542632 0.9620507784472830 0.5306516253802480  
0.1089790939416180 0.9708300461787602 0.9745068113332920  
0.2574197466541102 0.4752869662922223 0.4953606785103628  
0.2222595489456270 0.5381640510594746 0.9852572635964452  
0.0587707073981826 0.0294645678839902 0.4719092351280209  
0.2243224753207066 0.9672636174967589 0.9771801197726787  
0.0612320446680605 0.4690784270737138 0.4630989958991230  
0.1075128104959474 0.5335848353422871 0.9715110438645594  
0.2736193716164593 0.0371889574046129 0.4872062742001615  
0.2255603765842100 0.0346906989543265 0.0354888306387034  
0.0615780173144286 0.5368420262166158 0.5212318541296898  
0.1072698547178436 0.4648302567199416 0.0268133129279392  
0.2744534997173995 0.9702107633432610 0.5471163511537003  
0.5070252789851326 0.1354422164269909 0.1026049036408007

0.6700466414896795 0.6367379112610920 0.6233857964237409  
0.5063512052317390 0.3562577069541449 0.1159058957180421  
0.6705840913843993 0.8497290757204399 0.6186286500326321  
0.5048503722171751 0.8500594482517181 0.8702666670443514  
0.2967847588418601 0.3987773579317478 0.3304360905490987  
0.5002768302394965 0.6379936398477766 0.8667232087281470  
0.3310864526723211 0.1404672377240236 0.3797889184546752  
0.5066197808910506 0.0617286485879648 0.0425576518723980  
0.6715017171265686 0.5641234287286692 0.5586485821055528  
0.5046280517477346 0.4287396199732986 0.0510656039742271  
0.3320998778954917 0.9319782215773385 0.5679904427391532  
0.5057772113609575 0.9229247430735255 0.9322111463766117  
0.6745257179695848 0.4262561872739553 0.4404549987427773  
0.5015572669055032 0.5655524153409957 0.9316232001125073  
0.3304799264619671 0.0681587113787377 0.4456389797005209  
0.4485115653182498 0.0274488472308143 0.0139621107642228  
0.6146282835765137 0.5276288697944290 0.5279394262659841  
0.5615198837657933 0.4638277845846618 0.0170980091062570  
0.3888844259361234 0.9629755366736532 0.5262195993155997  
0.4481284939887272 0.9587575758132277 0.9595269550049004  
0.6161315010654872 0.4600108507561678 0.4699253166560829  
0.5600401263605528 0.5310566406560205 0.9583294567077729  
0.3880480072323578 0.0295857143157156 0.4659797723829960  
0.5638621640739102 0.9573086361860635 0.9607394909487366  
0.3564416861865324 0.5085880125187664 0.4054119897814832  
0.4447418000729658 0.5304225952027418 0.9656191892872744  
0.6197012132542236 0.0266234147335880 0.4629472317718902  
0.5643164371160817 0.0259206892998370 0.0154905923581317  
0.3657017986235149 0.5671112154309288 0.4790117727935198  
0.4461316902910879 0.4631618941186047 0.0244611594715931  
0.6169083233352091 0.9590035021026048 0.5204872324248805  
0.8418516356749115 0.1373568577335842 0.1239986222043001  
0.0040553000951471 0.6420425205500995 0.6254130496558196  
0.8397930915046422 0.3540883401278850 0.1255546824392682  
0.9992442957729456 0.8567361060963151 0.6297197124067294  
0.8333392444610696 0.8526078475833849 0.8769670912638169  
0.6752869592519878 0.3531999218328190 0.3761602893032086  
0.8364047602288072 0.6372790662318746 0.8754531625283127  
0.6796220865249086 0.1332354371138406 0.3728653427326930  
0.8400482440717870 0.0642959053762872 0.0593651262997842  
0.0044472388551753 0.5692366761045591 0.5596669178166026  
0.8388110973525168 0.4267240378462786 0.0604844061446626  
0.6731145475894019 0.9222466287968054 0.5536474489367068  
0.8350738647701426 0.9258550173096243 0.9411481784363747  
0.0038366557826095 0.4306309599068664 0.4409708633648877  
0.8370989351995735 0.5644094434033547 0.9405384763886058  
0.6786286683815704 0.0601777268230803 0.4364736207698113  
0.7813311745899031 0.0323426739212388 0.0275447945390127  
0.9470023303512227 0.5311130000073135 0.5366148727499993  
0.8959032410953275 0.4619678178581507 0.0279991958371832  
0.7320706050079464 0.9556035961984067 0.5267766427754487  
0.7788806838856767 0.9646124084069416 0.9696608668585922  
0.9466762624949439 0.4633674867090661 0.4785824270448638  
0.8950466355022832 0.5293171360930441 0.9691403103114995  
0.7348777708815218 0.0233514029791918 0.4691670031346565  
0.8937956703662909 0.9578945054505631 0.9728006430118361  
0.7313883085365011 0.4627735502281723 0.4710621239834918  
0.7799621822013224 0.5291465456427298 0.9731201819936695  
0.9437592588010872 0.0339837483755379 0.4778341799226536  
0.8962375462816018 0.0256241125547279 0.0307202380400967  
0.7298756225552437 0.5304454975932058 0.5290867278020718  
0.7808041630466696 0.4617398682498115 0.0319454159197823  
0.9427698026266021 0.9666023094145916 0.5366187868695309  
0.0035205230680972 0.2404093633428152 0.1082356033302165  
0.1688236781842323 0.7308389667362534 0.6235784140064826  
0.3376633575935151 0.7452614434131545 0.9027447929483200  
0.1649722288952866 0.2779999579040853 0.3884233385737662  
0.0657152034563580 0.0662995780995083 0.0551228223324802  
0.1024733114626062 0.9337783229817765 0.5515435876378065  
0.2161071932630348 0.4382546378948221 0.5032253478497983  
0.2673461690054747 0.5669832289778405 0.9692104719006768  
0.2688179791686464 0.9392288867726676 0.9548637543929743  
0.1060784194934417 0.4453574027570499 0.4333439184910445  
0.0626318004364390 0.5585161055672149 0.9441073158824826  
0.2286288255621389 0.0664375853646784 0.4720067551228344  
0.2709866571307598 0.0598881984433066 0.0595599717054748  
0.1067749271704699 0.5654502170263933 0.5372217226742138  
0.0621993585722537 0.4361762301060439 0.0435061791952363  
0.2300476049795753 0.9467134414784362 0.5791152061401702  
0.2285102970746413 0.5493878151607562 0.6267969203555634  
0.0635518865635508 0.9457174394816118 0.9502735192897236  
0.2669661791462741 0.4445586725345667 0.068387977477663  
0.1041702550964315 0.0541166811982812 0.4464690043304065  
0.3335235846094827 0.3164626629038436 0.1837226613814026  
0.4990462030609844 0.7583511814201942 0.6012433401133888  
0.6661529698528945 0.7643667204552302 0.8858580331146374  
0.3974726499120459 0.3702210795232346 0.3283596164076834  
0.4038647203974210 0.0556713807955980 0.0347692847182399  
0.4339723695692724 0.9340756020236785 0.5417684361157866  
0.5716312990673876 0.4323903336064009 0.4464390780474469  
0.6044048394793670 0.55776400741103838 0.9320249170996204  
0.6085436253381086 0.9295986295498314 0.9387302057633181

0.3909352207286307 0.4988711046970565 0.3399504717231489  
0.3991328109943524 0.5565773663861271 0.9450716861252559  
0.5758117218018837 0.0545086353001254 0.4370781052926660  
0.6092918068257873 0.0527923380589296 0.0380233767976743  
0.4082475419681516 0.6024188738855113 0.4744572008739134  
0.4016997293812876 0.4368565432554335 0.0512047939791168  
0.5707844976041339 0.9340133131370425 0.5407921684800184  
0.5689894098359005 0.5529619271294319 0.5505403798584656  
0.4031703282093559 0.9320359505918856 0.9366039380642648  
0.6071275840692668 0.4376279847703862 0.0376293242730370  
0.4324725410763405 0.0525567556659624 0.4333810420430769  
0.6829225020645507 0.2568336779815436 0.1007549880918833  
0.8349156966462233 0.7568097440392377 0.6080774582972257  
0.0000380250536706 0.7293514946346265 0.8938858534809077  
0.8408653970763332 0.2281057864525334 0.3920989565938180  
0.7372638597099610 0.0615896378593119 0.0491790897320337  
0.7760034081775563 0.9276421072700800 0.5522742442314785  
0.9015906853614309 0.4347662961253667 0.4617377119735461  
0.9398808348856730 0.5554989458664987 0.9442161474213148  
0.9378926519627223 0.9287142609583259 0.9511790073750443  
0.7770318312595378 0.4374517721018626 0.4485030530934849  
0.7345267864427334 0.5554029072468043 0.9515922507650038  
0.8990825938435715 0.0621629123886873 0.4570274731715698  
0.9422443270764304 0.0492761449130490 0.0549434005269196  
0.7743562678809037 0.5581848281267633 0.5523377159514795  
0.7359828434047353 0.4355085803786601 0.0570200511162157  
0.8973429926182441 0.9422778362022374 0.5625258599255712  
0.9021652117552789 0.5553857664098373 0.5654602439028130  
0.7328295740220973 0.9410524166955198 0.9455016076349528  
0.9412746665515986 0.4357273826972643 0.0498952451978670  
0.7810162847187847 0.0482658250836234 0.4487007945406045  
0.4420353544268240 0.2726435571969896 0.5015840273390056  
0.5115236910274920 0.2062909198341416 0.3849703173565365  
0.3658366850164219 0.3181472195680778 0.4984846376601780  
0.4377125412334275 0.3723227360895039 0.5179057266119627  
0.4222325097611396 0.2375956006144656 0.2387899328628056  
0.5930907357858478 0.2436516438938880 0.2408298119868124

Structure 5 monomeric Fe S=5/2

1.0000000000000000  
20.9172000884999996 0.0000000000000000 0.0000000000000000  
0.0000000000000000 17.8076000213999990 0.0000000000000000  
0.0000000000000000 0.0000000000000000 12.2158002853000003

Al O C H Fe  
11 61 97 64 1

Direct

0.5931282799565148 0.2436690092882641 0.2421823907060683  
0.0841906271015248 0.2489170523041718 0.2541797534472074  
0.2496335324556465 0.7547228492911743 0.7642419653536007  
0.2476229280203939 0.2518500604792874 0.2544346754893756  
0.0839614504020396 0.7518493723932708 0.7570251675380593  
0.5856234531059887 0.7426677016637939 0.7422066467352324  
0.4174001554167173 0.7477518552620089 0.7504285685184487  
0.7566881768245962 0.2455972566856880 0.2485493150061984  
0.9183982644191121 0.7473471488788090 0.7523922570313074  
0.9204540195656304 0.2476484950213360 0.2522144400594904  
0.7523140757836312 0.7438405009806940 0.74966637349915934  
0.6750015860639283 0.2460242420157157 0.1791235785730332  
0.8355216661600675 0.7454835531821705 0.6857202647780052  
0.0008382521955968 0.7489468298321440 0.8204720121284438  
0.8382400023184700 0.2467248748763515 0.3160000827839707  
0.7854773892669668 0.1674059526736250 0.1480430855759624  
0.9494870519284333 0.6695715014207195 0.6514285856615208  
0.8919135890491895 0.3264543235024303 0.1510221544921794  
0.7243204262558036 0.8226768206321655 0.6461820492793861  
0.7785976988728367 0.8253764187199933 0.8514350654281371  
0.9483014933145778 0.3293106336772625 0.3518189426800015  
0.8912015552079855 0.6667077379513371 0.8506953183254364  
0.7293685570554479 0.1640891945925470 0.3461953621543004  
0.8873233267891637 0.8244831436066127 0.8534930361944920  
0.7275017466795075 0.3231270170914159 0.3502968572996977  
0.7825570694623953 0.6657940529661186 0.8501253932529901  
0.9470017405688621 0.1696106264918128 0.3553365502404494  
0.8940392545649690 0.1661694444231210 0.1497662069036227  
0.7243121110455256 0.6633280820073701 0.6507709169485040  
0.7834897081827187 0.3259498323858008 0.1497743834383380  
0.9453450671979657 0.8282442272404603 0.6546945688675748  
0.3324758335470379 0.2603627279523805 0.1968310885928996  
0.5006682754381687 0.7455310467956887 0.6795639088898927  
0.6685889898807470 0.7435191328282138 0.8113480306272558  
0.4248687368292053 0.3339567046583423 0.3524755887479816  
0.4554058420660868 0.1615281736278459 0.1343350015103786  
0.6157102422409400 0.6640371900848647 0.6449308952480803  
0.5643168851181982 0.3256992591339366 0.1462531938118219  
0.3884419970684839 0.8300212637264213 0.6548261541465259  
0.4507751661867275 0.8228007300701633 0.84999995014084236  
0.6189627300849476 0.3221651519930064 0.3471501665603804  
0.5551298539861742 0.6643834720977633 0.8399793731521282  
0.3891484191586587 0.1644804436379406 0.3504523534495200  
0.5595638617635852 0.8218080708346706 0.8432694561036266  
0.3290117130676514 0.4063484406443922 0.2413420961416930  
0.4464583712070616 0.6643709901030531 0.8441580810308564

0.6213714539323584 0.1604808648970216 0.3369177140971236  
0.5643682350115835 0.1655653752941064 0.1330006732369773  
0.3824050486709963 0.6744812520598956 0.6486776171676917  
0.4561200084062543 0.3241189938654405 0.1403681840842630  
0.6155303212501801 0.8226253646007550 0.6411115618995216  
0.0023306102221240 0.2476438519033286 0.1880656210357958  
0.1668608003008228 0.7537667871588980 0.6947993510030626  
0.3352378551840567 0.7508957384271260 0.8235304760300107  
0.1656487724942178 0.2493281787106265 0.3212034733841365  
0.1144577351854244 0.1720977349558701 0.1544343744363258  
0.2737264886524871 0.6782285803247868 0.6630961968531219  
0.2177237136269768 0.3254865732716363 0.1446320799571242  
0.0538528272127348 0.8302374652715885 0.6581752426567575  
0.1122697346606999 0.8321587280534033 0.8566417242929462  
0.2621775947898189 0.3407499629958182 0.3518225820868136  
0.2205139786504673 0.6742505865888100 0.8646616072225436  
0.0554998034663227 0.1675663494145592 0.3528523767561638  
0.2209519491953079 0.8315580651210094 0.8613244083354794  
0.0566896622962237 0.3274829731344818 0.3554567196790002  
0.1117389218583443 0.6727059936528305 0.8593627594490444  
0.2808628473514249 0.1748312119803757 0.3601331644207511  
0.2229499369472703 0.1682365931258973 0.1625865048892112  
0.0582346791979511 0.6707972119877661 0.6532018041495649  
0.1095001821244111 0.3303205701347099 0.1531710501685341  
0.2798700628924652 0.8342613289775325 0.6653361034843834  
0.5138467043070289 0.2316559723571482 0.3107160020292554  
0.4151303985034354 0.3247255302326791 0.4681842071168326  
0.1686601606026357 0.1422070948491719 0.1329439526673822  
0.3261457475754879 0.6501438945125239 0.6286812746496493  
0.1639618444308631 0.3566232678770042 0.1245625610210778  
0.3338919015399266 0.8600164832365560 0.6347693150937890  
0.1661861741391095 0.8600617354631064 0.8838620841970298  
0.0024371233919318 0.3570402949259622 0.3784741262056264  
0.1660765279106649 0.6449129741273169 0.8863154639467095  
0.0012690384261465 0.1402792512159725 0.3792759287762559  
0.1680985851614724 0.0700118384870586 0.0674282684896320  
0.3191269877052645 0.5829664556923674 0.5557427287335011  
0.1645762841122459 0.4307420111471361 0.0624567734209454  
0.9997926575764496 0.9298652106526362 0.5650654381152898  
0.1665239082058826 0.9327893875054405 0.9481628362888740  
0.3022687821483944 0.4616928702811214 0.4105567912269563  
0.1655840088823064 0.5709439839565873 0.9486029202706741  
0.0007153480285290 0.0673804518926060 0.4443793272244854  
0.1100721800102562 0.0364867512060515 0.0356736751077209  
0.2650208408678816 0.5364355757277846 0.5637709338548428  
0.2222864060087116 0.4684518268878229 0.0402259200973416  
0.0575521476686821 0.9632568474029822 0.5313833198885457  
0.1092565457312488 0.9691150054959441 0.9770263156012206  
0.2576253536334865 0.4750077654270576 0.4939166333783412  
0.2226857698559413 0.5371411349727022 0.9845264388121369  
0.0579970740470844 0.0305386892847868 0.472228463733668  
0.2245562411666814 0.9665302142008410 0.9794680852066677  
0.0606114365092330 0.4683636905047295 0.4653571590240509  
0.1079124127466920 0.5332039787600398 0.9711612358039515  
0.2754446683467126 0.0380788674366940 0.4873996273784977  
0.2253678163576681 0.0338820276310376 0.0380936727306556  
0.0612594863794194 0.5360054549096249 0.5237953965126237  
0.1074120214114476 0.4647055371467221 0.0271637618449992  
0.2758996772963532 0.9710089160680643 0.5471944579954325  
0.5108942008331129 0.1355210635058260 0.1091806373356975  
0.6704226766827825 0.6353146453320543 0.6227710117597484  
0.5102384011947672 0.3536977956504868 0.1184311669446140  
0.6703589998610104 0.8507740576641324 0.6186517479494693  
0.5058352544040672 0.8506595732251347 0.8704511759631764  
0.2961962100396748 0.3990333095367711 0.3279929029516522  
0.5012412501869329 0.6362614004566214 0.8672781257901424  
0.3334298041888107 0.1415659962536482 0.3806812310879888  
0.5103881242952614 0.0625459534308325 0.0461653858328194  
0.6711562745604184 0.5622308796925262 0.5579054318056188  
0.5087694387270062 0.4268241371587695 0.0544739534134351  
0.3333189628846408 0.9324194512230690 0.5686392163232061  
0.5074944152422302 0.9240961234662529 0.9322602329631225  
0.6720174299278575 0.4240919232092830 0.4384697284815502  
0.5032314655304782 0.5636828768204520 0.9330966615659320  
0.3325182589842191 0.0691094252614188 0.4465099820116071  
0.4518930071546144 0.0289469647204299 0.0173874639622631  
0.6138557821278970 0.5263601525464690 0.5273485367039014  
0.5649069164005361 0.4629111849491652 0.0191806939541754  
0.3902864864683031 0.9634750120085586 0.5276962340277594  
0.4504458664338414 0.9607315091331100 0.9614015029959329  
0.6142400579751984 0.4587767623359586 0.4688644185336004  
0.5621432931355421 0.5298738320914655 0.9595147471869108  
0.3898512794790320 0.0302623596115874 0.4677477395273935  
0.5659297373778377 0.9581239509153412 0.9602627612002429  
0.3559272186879334 0.5090053520450009 0.4022927430890409  
0.4471454166542638 0.5277802612040784 0.9690909037516668  
0.6162975401790316 0.0265196845140696 0.4608663321882619  
0.5674403239664753 0.0262984837533749 0.0165790284552331  
0.3653794967160953 0.5674769924038008 0.4759616759920475  
0.4498109683525715 0.4607876960299063 0.0286955972475131  
0.6149702572369673 0.9594208141425686 0.5202266328793488  
0.8396156541620940 0.1383368672194430 0.1241808323909187



0.0041709694992724 0.6419995202459354 0.6270517195351054  
0.8377841458623839 0.3545727163088960 0.1250761557208328  
0.9996372119827541 0.8573921705779819 0.6308583114370718  
0.8331192992018394 0.8532144188154277 0.8774522059551754  
0.6727576726362310 0.3510051389126764 0.3737661239644842  
0.8369292142102381 0.6380578314545293 0.8756260430306777  
0.6753206518716361 0.1338571934978642 0.3672530087039517  
0.8382333372809880 0.0649846612663912 0.0602210547934490  
0.0042542756819899 0.5689505011621947 0.5618361308149912  
0.8376124921133923 0.4273194950250288 0.0601502054411710  
0.6717808005544906 0.9238319637644306 0.5535568327786682  
0.8343438068222570 0.9264177011897281 0.9419853189010027  
0.0030312922386497 0.4304626348544264 0.4425373285716551  
0.8373057577221319 0.5652039588369375 0.9406539677868663  
0.6744174368844778 0.0612952246812814 0.4326094991900402  
0.7797671358599451 0.0325264840263925 0.0281012761809656  
0.9466373935869662 0.5312881414564126 0.5383757564117223  
0.8950950720107222 0.4619514851038785 0.0280236510795757  
0.7299447921547593 0.9586131710349374 0.5253607175967662  
0.7778811720038491 0.964748030333368 0.9702203769888521  
0.9460158219008201 0.4636312934238430 0.4800571522197063  
0.8949294092987203 0.5294385329402170 0.9694118695581645  
0.7312704735525080 0.0258871712243499 0.4661653833615500  
0.8928012618669050 0.9588816458717534 0.9742281709070474  
0.7293624759677763 0.4599021975745455 0.4688692027403226  
0.7798311795079502 0.5305973381800017 0.9729202256679694  
0.9430003595666699 0.0338653533260225 0.4778592499398064  
0.8947046537542255 0.0266509965348162 0.0321215020122578  
0.7289599945428561 0.5274780319808359 0.5274087056705568  
0.7800008997679143 0.4631081078303425 0.0314654228179133  
0.9425172956300920 0.9665806628428171 0.5369855805291825  
0.0027002487847245 0.2429124464715307 0.1089631430738885  
0.1687917017493690 0.7291149653170470 0.6239026160191252  
0.3376156917306409 0.7426455231800460 0.9019587313186809  
0.1657627623112991 0.2788060365252307 0.3882084083877484  
0.0653756449805170 0.0640604049448508 0.0581046444383863  
0.1024264342807631 0.9355027215806071 0.5523873159544839  
0.2166027978161350 0.4376040728646655 0.5024322779151185  
0.2678953474308299 0.5656112799967228 0.9681975981808590  
0.2692602053187119 0.9390368931373810 0.9568964579107021  
0.1053812329779272 0.4443475447425797 0.4357786571684784  
0.0631170335010008 0.5583440419541168 0.9437228899400805  
0.2304788346871556 0.0672970566940155 0.4718188829942461  
0.2706592747824919 0.0594666085918421 0.0620351913799265  
0.1066047865751339 0.5641524477349390 0.5402321304875645  
0.0622160977533368 0.4364770115994669 0.0444038732154132  
0.2312841143838525 0.9476822871426643 0.5786196894424686  
0.2291340198001827 0.5486723752119973 0.6261084246101943  
0.0639503321628217 0.9437352812457560 0.9526838119062496  
0.2670022327043455 0.4436851848730942 0.0687289074952876  
0.1032193783299938 0.0555007165583480 0.4465227812272867  
0.3337180011738052 0.3149815645390907 0.1789639684597352  
0.4996178206473384 0.7596045516143677 0.6028097574679074  
0.6668849569295895 0.7653264259343833 0.8841902297502165  
0.3949772922720667 0.3709829831824364 0.3203011241476661  
0.4075871149018707 0.0573502222001599 0.0397414069910073  
0.4352249367752564 0.9343949007149218 0.5437897074991079  
0.5693262704730836 0.4319571589381323 0.4457640845654589  
0.6060202585848288 0.5570537952188387 0.9319498458986825  
0.6102723112760368 0.9302323607176053 0.9367764677842273  
0.3901856000934409 0.4993534184741017 0.3364848822657923  
0.4009620504216219 0.5528579859979982 0.9493848695347784  
0.5716898260123756 0.0528068132927902 0.4351718536028338  
0.6128203020808149 0.0524035118492163 0.0385908810558078  
0.4077792361294462 0.6029823661680892 0.4708104933689562  
0.4058038988909256 0.4340672717133570 0.0566943579630797  
0.5693104015475736 0.9337798959617919 0.5418405295272625  
0.5686151308167873 0.5523027012620181 0.5507304286818133  
0.4049788040012806 0.9349568809352956 0.9390472003086295  
0.6110476803268216 0.4378380154354253 0.0390506499964299  
0.4345308042817266 0.0531418239640834 0.4360597262049506  
0.6765973063967143 0.2701723168805866 0.1079283444197510  
0.8357370934500481 0.7585243786513969 0.6085654810729267  
0.0006066895185280 0.7286826397342639 0.8942956305850398  
0.8380114886945141 0.2306483372158497 0.3919250022945816  
0.7354711835542825 0.0614318759338144 0.0493535034520055  
0.7745425122494963 0.9321340075179362 0.5508699294211604  
0.9007780793075328 0.4354619449117871 0.4628699453029271  
0.9400143444361417 0.5552396081947540 0.9448784929770560  
0.9371178696725718 0.9300218636324152 0.9529972160207429  
0.7746095240765775 0.4339050352135542 0.4455489523724124  
0.7347084227659243 0.5575456416745714 0.9513401975572698  
0.8980948446353758 0.0614379770584799 0.4566887601279015  
0.9405093685585711 0.0506769344572401 0.0566896370714147  
0.7739156369581767 0.5542365503520803 0.5504522359296576  
0.7349290396859003 0.4374216428709792 0.0563320060658247  
0.8972438702374712 0.9417676386864393 0.5626975314646150  
0.9018910780810994 0.5558920187114450 0.5670710271022825  
0.7320652820513666 0.9407473273579904 0.9457207658774567  
0.9402226541296113 0.4351866135764929 0.0500571682202410  
0.7769198182759006 0.0516956156994158 0.4447048579876433  
0.4459500231944033 0.2781455039715087 0.4937342330253675

0.5164135538037252 0.1923440519495203 0.3658443704792291  
0.3650063560450609 0.3112971151421901 0.4872057328256167  
0.4295842318235448 0.3761310854619634 0.5115460775299163  
0.4247339517706910 0.2389926807624836 0.2401923575780197

Structure CH3OH/1 S=5

1.000000000000000  
20.9172000884999996 0.0000000000000000 0.0000000000000000  
0.0000000000000000 17.8076000213999990 0.0000000000000000  
0.0000000000000000 0.0000000000000000 12.2158002853000003  
Al O C H Fe  
10 61 97 64 2  
Direct  
0.0829688774013583 0.2492683959831427 0.2504648080540068  
0.2506504129258454 0.7523176019735596 0.7529033765081117  
0.2470610644644871 0.2485888046166307 0.2497399210457928  
0.0845518632522275 0.7506261838823992 0.7506025062020156  
0.5858196811948168 0.7469449618697747 0.7426293734033732  
0.4178712470133371 0.7510483047909429 0.7437343685211425  
0.7556372520252770 0.2493244188437586 0.2509028748661811  
0.9185667180615639 0.7477948739539942 0.7507214523106024  
0.9190924336847341 0.2498809190308923 0.2506440382813105  
0.7525226681670859 0.7454569736128764 0.7503181908431189  
0.6757862496610877 0.2455752388245308 0.1796817818729999  
0.8358222763124673 0.7465171832583563 0.6850494845581138  
0.0016136420617952 0.7487516776940711 0.8162340184568927  
0.8373872605261626 0.2483506166903434 0.3169508367845292  
0.7834885243344666 0.1696567670851088 0.1470935446103934  
0.9491780210406424 0.6693709485060140 0.6494695450098487  
0.8910195999539154 0.3286681402663803 0.1517138185744407  
0.7256715658606162 0.8236176844442932 0.6467368649015690  
0.7795054776442811 0.8266842007791406 0.8510828276162484  
0.9483055448979691 0.3299796363028953 0.3492223852859060  
0.8912381358482111 0.6678859615347423 0.8497152066632540  
0.7304866535679506 0.1675548792028934 0.3521005571686706  
0.8883134483372540 0.8264308586445404 0.8519847485868767  
0.7251020244083149 0.3277630709483801 0.3502920467716271  
0.7826142070505266 0.6676713409856980 0.8501348833805027  
0.9454812523292601 0.1703426178077090 0.3535392587676548  
0.8920083470627967 0.1683589937612141 0.1479407587403433  
0.7238068106507398 0.6662648170398315 0.6524905700956354  
0.7827640247879579 0.3303501780742907 0.1552404788228518  
0.9455761899617632 0.8283174345829110 0.6517422470729232  
0.3277548347537756 0.2507995144443421 0.1796155018988536  
0.5016383542718765 0.7497697708447955 0.6763840131980208  
0.6686885977986916 0.7465676711637773 0.8128514206869516  
0.4841135978639189 0.3386381901120357 0.4902735445612745  
0.4539099218564406 0.1649204064756458 0.1384121356461647  
0.6151665445143004 0.6680169309916100 0.6466763543627478  
0.5517187598927197 0.3297808147197518 0.1325039139033668  
0.3888627227336828 0.8307874010382263 0.6482089900998531  
0.4500256773877697 0.8276729780353554 0.8442257219119605  
0.6171166393760427 0.3345725064206709 0.3415697276394454  
0.5538542109497387 0.6692795373426544 0.8396452727306121  
0.3846320218908034 0.1639210017810712 0.3429413920413327  
0.5589586342220990 0.8255442509450973 0.8430533927553132  
0.3820558713990864 0.3331600916920984 0.3568713287218235  
0.4451284050060299 0.6710852094505386 0.8397334273167626  
0.6218190187038811 0.1676716418455608 0.3591679441748170  
0.5623639679030920 0.1619971329040230 0.1448744712594680  
0.3852752352170553 0.6739270441139451 0.6423959001353347  
0.4429573963931314 0.3320841362533172 0.1369337097699223  
0.6168019594710799 0.8253960931600978 0.6427877333398994  
0.0009554550316931 0.2485545576733262 0.1849029960217792  
0.1676214066374846 0.7510489242557257 0.6861213942068654  
0.3349460519377948 0.7514383442177818 0.8144747022650148  
0.1652393202531226 0.2491090092074478 0.3159676738805661  
0.1094052638713204 0.1695153044919062 0.1509411698939380  
0.2764954103095221 0.6729266426905189 0.6518448323747074  
0.2203157078152840 0.3286362350469512 0.1481012802886150  
0.0541516524681121 0.8295827716130457 0.6521222242081249  
0.1128040042406598 0.8298432594411996 0.8494762875578493  
0.2735288743167612 0.3307561324115494 0.3517686619486947  
0.2222472894521642 0.6721968648914729 0.8549276699312554  
0.0541161869991826 0.1696812106771328 0.3531168338339367  
0.2214129451711344 0.8310575464203495 0.8505663424254192  
0.0566831877383693 0.3291876439336383 0.3492430082164615  
0.1133958996941014 0.6710575394238431 0.8523293631783455  
0.2763856831217710 0.1693903809531677 0.3484986600241633  
0.2177987670025900 0.1689957470637156 0.1521176519692131  
0.0579441231580234 0.6707206727713895 0.6485654136248282  
0.1117680575423581 0.3291012700364175 0.1480127694085011  
0.2801690741795473 0.8307420792696855 0.6533504303157035  
0.5014761762087990 0.2500913479773440 0.3164199632717162  
0.4704845855079110 0.3201028326052858 0.6018753340941083  
0.1637662606315120 0.1409614150630931 0.1260478425085166  
0.3304143388654977 0.6455540027333084 0.6222689775619554  
0.1659718842118276 0.3572302627166223 0.1230133734081168  
0.3339092045295139 0.8586049854361852 0.6252165713153260  
0.1667442103860490 0.8585654299149443 0.8753061895104391  
0.0024518674784373 0.3580520053186403 0.3744571391257125

0.1678123564061076 0.6431707335879913 0.8779812536208466  
0.9998568576595073 0.1417035655358311 0.3784233401165935  
0.1641564720246628 0.0684536602577960 0.0607506863885795  
0.3286026385519872 0.5729999471638353 0.5574807911499549  
0.1665389137441676 0.4304139332250934 0.0585639133191053  
0.9995209282156998 0.9302669912315041 0.5620580222676116  
0.1658723295882483 0.9311357721410655 0.9405924334102700  
0.3262889102900998 0.4352878449154181 0.4389016140715100  
0.1675093525358044 0.5693724675899040 0.9410662424410079  
0.9995987321920691 0.0685768270359090 0.4430733803823957  
0.1069947159165053 0.0325860142826282 0.0298388506492142  
0.2722350153483085 0.5302189984616257 0.5493286437754534  
0.2242563917135319 0.4666742762773703 0.0317538176355815  
0.0570667070599153 0.9647102779505252 0.5295922627789591  
0.1078246482653552 0.9653061011701104 0.9708020345953509  
0.2710998710102165 0.4625428796207751 0.4912609904028050  
0.2247545039582886 0.5346028984739017 0.9742139907504465  
0.0570910254975558 0.0323808922735501 0.4713885591145199  
0.2230398410774334 0.9669882341650765 0.9715178020308755  
0.0605791232594971 0.4681119293984169 0.4640522429648319  
0.1098038230825248 0.5328903541456166 0.9674168171839899  
0.2732376195861525 0.0316291285286819 0.4703587099505077  
0.2221957590145831 0.0343035491021390 0.0304139024144686  
0.0609322048865343 0.5356027874939772 0.5227101520246317  
0.1092941674945876 0.4649583280767154 0.0249795869996668  
0.2744567491763482 0.9648094232331784 0.5303715282830433  
0.5081506943043563 0.1351237345544121 0.1171030031388943  
0.6696863002854633 0.6391244289063799 0.6243225683587204  
0.4978354704937680 0.3589817679109883 0.1099091605971920  
0.6719129167813964 0.8527191909372295 0.6202276782394530  
0.5048691919948568 0.8542365045376620 0.8688830758744426  
0.3268672209237902 0.3609601072124072 0.3776480499717119  
0.4993260498498775 0.6420208745685021 0.8642233192123814  
0.3299837489723796 0.1385329119638796 0.3711759403617519  
0.5078893251962638 0.0624420353619315 0.0536264066341500  
0.6700842575238632 0.5668868497149387 0.5590438914253377  
0.4977716861702776 0.4319070137971789 0.0454834723096276  
0.3327231254968373 0.9305214278265226 0.5589674318086640  
0.5061961874717377 0.9261502914856699 0.9344547394979907  
0.6713556849462713 0.4306652822530788 0.4386184767276390  
0.4985681373576055 0.5693119010135084 0.9277725326215716  
0.3302887473261990 0.0664353880241165 0.4369619851145255  
0.4497383716551789 0.0286189609382602 0.0241223321809761  
0.6129073678172056 0.5284692772130914 0.5357102343037610  
0.5556767680167974 0.4665800377355693 0.0160762394175813  
0.3897797761808119 0.9654233596446563 0.5254483406879910  
0.4488997535583830 0.9614201736547729 0.9655367247728477  
0.6133721942841419 0.4613199468567423 0.4765400803044166  
0.5560687631860635 0.5342031133986669 0.9582733509561638  
0.3886098375802188 0.0321238800317584 0.4653992108792971  
0.5644097615436353 0.9599636020509246 0.9642251425209801  
0.3823384659948367 0.4788780631238965 0.4457718352798668  
0.4406444079930383 0.5344539396080106 0.9565054195053211  
0.6183034779009215 0.0312433816603173 0.4715971302696883  
0.5652859400430118 0.0270368464783847 0.0232535901772700  
0.3836269698517438 0.5461059552987210 0.5045061518799778  
0.4402713721750213 0.4669257562208218 0.0145941311445364  
0.6169028488824903 0.9629927303913628 0.5278195637187229  
0.8375397853138336 0.1405694952634532 0.1223440443874440  
0.0035918098668080 0.6419045663621783 0.6238466872442705  
0.8368409880025526 0.3578260546456259 0.1280704133390625  
0.9997787483198091 0.8572668511431777 0.6268007779919569  
0.8340002194293011 0.8549002984775604 0.8760914042413003  
0.6717630275860502 0.3591140423624322 0.3722763620803256  
0.8368942325806412 0.6396807236533608 0.8755424070358783  
0.6763975986383712 0.1391210575915519 0.3796591483931909  
0.8365287652292490 0.0673060058706260 0.0579130707743807  
0.0036772364916583 0.5689822890571741 0.5587307659961785  
0.8367242540983951 0.4303437366230076 0.0627252596840174  
0.6737435477252234 0.9259612900417106 0.5570868732400094  
0.8344907739040625 0.9284531795790194 0.9398666933339028  
0.0029610925308967 0.4309896304613220 0.4391535358462744  
0.8369427935921133 0.5673390056398632 0.9415275192316991  
0.6765728631500605 0.0651311821918123 0.4420252937780582  
0.7785588417380409 0.0339295350435657 0.0251545387564928  
0.9460568151494581 0.53190505713994486 0.5335221086859705  
0.8943316925958938 0.4641574151802003 0.0295768711660864  
0.7320698645439931 0.9598219547434487 0.5277383566129331  
0.7775458505242535 0.9660891457981606 0.9673487072712915  
0.9456819782027093 0.4644151087196629 0.4749986193464624  
0.8944399682095664 0.5312578698534864 0.9701122897550855  
0.7334791242527313 0.0280253020608202 0.4709897841810310  
0.8924538639524804 0.9618370195048228 0.9724640369214987  
0.7285317112481405 0.4687583713440118 0.4621627721725441  
0.7793020928936514 0.5334931701088880 0.9748147737259021  
0.9420811410438521 0.0340828321471848 0.4754652917883427  
0.8934235464690696 0.0296790746279852 0.0302183348662821  
0.7279080052896189 0.5357518658176900 0.5215716263563205  
0.7791618728057447 0.4663626722402185 0.0342854990463962  
0.9420265530485433 0.9664623449765495 0.5337991591933240  
0.0008307726122447 0.2266816656910633 0.1120754332099587  
0.1684230354931428 0.7275075962506471 0.6143763504047454

0.3366887243421907 0.7333028445726396 0.8893853727133557  
0.1651094511609917 0.2677301336850575 0.3906609966624571  
0.0615496424417451 0.0581138935930798 0.0530214051761948  
0.1021388462356876 0.9375208999703039 0.5508600126881052  
0.2271072126440639 0.4297592901276817 0.4866080408535869  
0.2700790881261123 0.5616566494975784 0.9542139826000822  
0.2684309707782406 0.9412669617347406 0.9484478178720657  
0.1054831086288629 0.4435315301644571 0.4360484983140810  
0.0648839355731873 0.5585939249194080 0.9417696097752547  
0.2278438969374208 0.0577899051954167 0.4483707117911231  
0.2668965169985892 0.0614813675138312 0.0539009257469480  
0.1061726018423828 0.5633676292572244 0.5411442652802076  
0.0640471843508113 0.4376860210333158 0.0449201990622573  
0.2299504040171685 0.9382274973105653 0.5561891279185198  
0.2291910689167251 0.5503402475748530 0.5904033959673111  
0.0631022729565868 0.9382766883682310 0.9470816072894928  
0.2692167314854785 0.4410148941320889 0.0572932107660024  
0.1021625483279000 0.0582020329436908 0.4467449638960347  
0.3269491445958295 0.2833887432570268 0.1155774487515920  
0.5017792921346093 0.7642005215557514 0.5997532743041376  
0.6674336593496328 0.7685606115502879 0.8855837767402961  
0.4430642221015190 0.3463909920353720 0.4508269019734011  
0.4052965347962419 0.0561220311902369 0.0480787201283999  
0.4352828608886328 0.9395624838900892 0.5474858223017778  
0.5687636166356693 0.4313977276867287 0.4603817214240760  
0.6011303142120950 0.5608864737986498 0.9356432853162997  
0.6090501299989853 0.9330058128218032 0.9399621048219108  
0.4255349642309719 0.4600069395747373 0.4040733318885151  
0.3958330780733272 0.5610493734866395 0.9322660976815641  
0.5738935037828822 0.0595549229046093 0.4495446491047199  
0.6106013895860701 0.0528185148033011 0.0465683302155999  
0.4276659373774046 0.5787533230892388 0.5097499156143992  
0.3950717631250120 0.4404783963288187 0.0368972521788041  
0.5713523475807443 0.9375021440900547 0.5504338879492841  
0.5678503361746453 0.5518404758374091 0.5652427377628826  
0.4036721964208733 0.9353457813037912 0.9425764214880059  
0.6004362433385148 0.4395577376081165 0.0395136482619856  
0.4331524932137622 0.0586627890422403 0.4395959942624384  
0.6763106442836050 0.2107094212349381 0.1182773154135326  
0.8355480045227114 0.7647608800273811 0.6101379100102067  
0.0018224151116140 0.7329973448666103 0.8923224597766375  
0.8373950168965462 0.2209849631961982 0.3857908902014647  
0.7337496647271876 0.0618747421204676 0.0458974974853229  
0.7765733367051574 0.9318822254010918 0.5504091219516958  
0.9005157781153699 0.4365343551040152 0.4563430455392616  
0.9395941515694287 0.5564418550495668 0.9446294156053873  
0.9371339234164850 0.9336094376359675 0.9517031390297600  
0.7734184901314618 0.4450251832902603 0.4326008167591463  
0.7342937792838217 0.5606782723328735 0.9531126216780843  
0.8969430566698136 0.0610497767852569 0.4540974672951472  
0.9388945021953846 0.0543345267104982 0.0551802344358140  
0.7724783497357522 0.5650253161131886 0.5396078578999273  
0.7340442621965572 0.4409058564811180 0.0595475621078254  
0.8968816020364873 0.9409359892472819 0.5586517431863783  
0.9012021632369156 0.5569423593800418 0.5609857195247034  
0.7320322652424830 0.9414869437992716 0.9424253439798845  
0.9392620343715057 0.4368318457430401 0.0513282194662320  
0.7791593510647609 0.0532151790798756 0.4483430371502546  
0.5150395623013821 0.3000309000839805 0.6392604117886195  
0.5017346060560749 0.2763177234201387 0.3892268077264547  
0.4340739149654164 0.2754930612481227 0.6080502569404441  
0.4537823158857761 0.3700170853143128 0.6471381327706900  
0.4178695188926949 0.2452918188458697 0.2406225280403500  
0.5878040173030636 0.2492846248732115 0.2469955357186562

Structure CH3OH/1 monomeric Fe S=5/2

1.0000000000000000  
20.9172000884999996 0.0000000000000000 0.0000000000000000  
0.0000000000000000 17.8076000213999990 0.0000000000000000  
0.0000000000000000 0.0000000000000000 12.2158002853000003  
Al O C H Fe  
11 61 97 64 1  
Direct  
0.5875114274246112 0.2488140113457843 0.2462469934014820  
0.0837026417686168 0.2491526950307343 0.2499603888643377  
0.2507872560281235 0.7518275637916766 0.7516220533472094  
0.2488241708790246 0.2483193584082864 0.2488033743847731  
0.0845579119085573 0.7505261897976310 0.7503312333497530  
0.5854383704339271 0.7470391459325185 0.7446567112826216  
0.4179083267717760 0.7499843230690688 0.7456435756329232  
0.7528762494746569 0.2496361677031211 0.2489733855408530  
0.9183611682012289 0.7482199821937172 0.7503307640169041  
0.9183937067028988 0.2498160216666126 0.2504318886081286  
0.7520472659519601 0.7465034292399315 0.7493072951051258  
0.6700571383038216 0.2475978091996527 0.1809480801787391  
0.8353716018986321 0.7476197928281390 0.6844264175201897  
0.0015213401409502 0.7488351848622903 0.8159217893229733  
0.8357100266546210 0.2485160410735234 0.3154154672331560  
0.7815358875588870 0.1701826786051849 0.1462879399497520  
0.9488831186515780 0.6694634430673413 0.6489731288102707  
0.8901013383657755 0.3289662814076863 0.1519813483055092  
0.7242791671879600 0.8260425284227508 0.6465442125668299

0.7793881977898368 0.8272478388726050 0.8507235371561243  
0.9484798262241045 0.3295154155538470 0.3491779391632559  
0.8908534386312239 0.6683146186998605 0.8490805639517489  
0.7261855943702903 0.1689955871496569 0.3498862560563687  
0.8882027981553582 0.8269320885477945 0.8518479455516759  
0.7233367863065001 0.3280818667624785 0.3474028406529002  
0.7822309375851100 0.6681742532829208 0.8491984454264551  
0.9456619864940269 0.1702812022145415 0.3526461002246086  
0.8903200158292074 0.1691514047061439 0.1480565524168637  
0.7233616064645455 0.6668930770792630 0.6509522352720905  
0.7816182720980344 0.3293755822976906 0.1516286086590382  
0.9456617602812933 0.8286126952196932 0.6515924709795783  
0.3298471348150788 0.2491215456171696 0.1807591740282793  
0.5015594513286098 0.7491370148999477 0.6789467924880734  
0.6684474685490549 0.7473616011501546 0.8131261645120601  
0.4858180817626683 0.3349699966094485 0.4912285163501833  
0.4516638041088897 0.1652845281691364 0.1415256269780829  
0.6147791455646492 0.6677509699482618 0.6480210457206167  
0.5555881309045153 0.3280177639217022 0.1405020706417396  
0.3893794512544240 0.8300184901740474 0.6490454209029010  
0.4492205814057963 0.8273565177760844 0.8467245838066317  
0.6150823850177591 0.3302240805901282 0.3409054481297977  
0.5540003581308638 0.6686448421188973 0.8423053953812183  
0.3870561413504079 0.1666815809280784 0.3502399074520192  
0.5580868988531108 0.8262373913891594 0.8455692158472916  
0.3844913590171807 0.3334585801658689 0.3551572013217816  
0.4453076025031019 0.6689915076654179 0.8418209632816598  
0.6174569817897881 0.1686929757052762 0.3489706563615931  
0.5601563920128545 0.1668594777959877 0.1465908747959297  
0.3858749456003385 0.6731092176234273 0.6433638426109263  
0.4466957144654847 0.3298884996447769 0.1388864295594252  
0.6154347354728382 0.8264897416714191 0.6440672764701095  
0.0010274616481189 0.2485275103895493 0.1846773864081906  
0.1676327694574871 0.7506876836661814 0.6852880087645538  
0.3348599673807799 0.7504614322128897 0.8144406899878407  
0.1666313403509795 0.2490578784624734 0.3152234359260390  
0.1108094300751422 0.1693602822833513 0.1507476295999201  
0.277021777694512 0.6723337731162439 0.6506077228064870  
0.2215307642955044 0.3283338179768498 0.1472544336488902  
0.0542432098466411 0.8296585310967295 0.6520123875198480  
0.1131718821679102 0.8297549305211238 0.8491049232225887  
0.2759225461450470 0.3305469123920519 0.3502929922582863  
0.2223429095975945 0.6720035230569914 0.8538628292475527  
0.0544202539385680 0.1697325469771676 0.3522693364137189  
0.2217859825526266 0.8308233288488105 0.8492700387986110  
0.0569799040411622 0.3290035491002359 0.3487502381682655  
0.1134927178172702 0.6709783125455294 0.8521863216363251  
0.2785904502384709 0.1692125009833525 0.3486043646442922  
0.2192792959058882 0.1687886697862624 0.1515340038556724  
0.0576667524712918 0.6705990924838967 0.6484514741753673  
0.1128811718520858 0.3288853662727568 0.1478292833210984  
0.2806776798218368 0.8302360002936904 0.6522335980164666  
0.5068546548331910 0.2492270389638139 0.3135084935268865  
0.471810922358941 0.3170987563013475 0.6028113241084353  
0.1651656275075001 0.1408148857616898 0.1257175532897688  
0.3311151240477470 0.6449225183516037 0.6219503687788336  
0.1671459063994191 0.3570174144878658 0.1227999632820957  
0.3346629520605582 0.8580674156421502 0.6251495706155981  
0.1672209281895177 0.8583909605736586 0.8745327420760264  
0.0026825429010824 0.3576549870891246 0.3741739606052962  
0.1679592289844565 0.6431309638152769 0.8776699286742597  
0.0001097914258211 0.1418030121156713 0.3775811547121052  
0.1654845954173897 0.0682563799314756 0.0604074941336846  
0.3297889248526015 0.5724911485485631 0.5566812234656378  
0.1675169592412335 0.4304931226745736 0.0588275996653420  
0.9997402804097910 0.9305350585997547 0.5620377006194193  
0.1666612242135186 0.9309399072237541 0.9399992659889650  
0.3284279668922986 0.4350771867040211 0.4374704082193185  
0.1679217175900812 0.5695521677854126 0.9413522836307919  
0.9999182472130733 0.0687347808481044 0.4425635074439983  
0.1082178512877569 0.0325221962213385 0.0298090637596921  
0.2736274473217451 0.5294098899423734 0.5478210130586316  
0.2251008121178172 0.4670653875637591 0.0319514142277020  
0.0573107125347495 0.9650027132242853 0.5297213414179868  
0.1087664368509442 0.9652668238258446 0.9706987753122556  
0.2729763275100330 0.4618808371592915 0.4894245646333572  
0.2253040233553717 0.5350391466793259 0.9744496472263244  
0.0573933925028853 0.0325979046349708 0.4712779487210055  
0.2239643938282510 0.96661524223288993 0.9706916909097032  
0.0606463449202401 0.4679677064311298 0.4640166837988104  
0.1103632895464759 0.5329055320764438 0.9681378992685522  
0.2752313340511635 0.0321466683525819 0.4709816713545601  
0.2234012399930816 0.0339012609590560 0.0297306653086117  
0.0608194346370763 0.5354800897210167 0.5226849719715637  
0.1101452233958276 0.4649485871800551 0.0256640967476478  
0.2759613052393624 0.9650512548697560 0.5303556151193145  
0.5065535018109816 0.1377263139979982 0.1191276651260859  
0.6691803224833707 0.6390264144104257 0.6241993455061607  
0.5018495049029301 0.3568730275951737 0.1145407385148150  
0.6701515299033951 0.8546318416913663 0.6206484099946299  
0.5038472901794249 0.8548037394619717 0.8710288092738353  
0.3291231969101677 0.3609561764771443 0.3760344519845937

0.4997130876428916 0.6404177318178506 0.8665130333698907  
0.3322501124357703 0.1396011753897277 0.3741372684896280  
0.5062006785790847 0.0649452942670183 0.0547765425219838  
0.6691766996834697 0.5663374193469359 0.5589009463918463  
0.5012152552715016 0.4295637073947033 0.0491023783314973  
0.3339765815327898 0.9302590526846856 0.5592454077337661  
0.5046659712870828 0.9275510533621829 0.9357237991044908  
0.6688870548781314 0.4293087128676686 0.4372347608990021  
0.4998035312776278 0.5672222111789372 0.9300472045248619  
0.3324759258166172 0.0668994854820335 0.4385985291173575  
0.4480817028470485 0.0306811170856316 0.0247012239302600  
0.6118108240047809 0.5281119743206877 0.5357735772812947  
0.5584108543654607 0.4651729879326261 0.0183945272641933  
0.3912653584512931 0.9650316652673097 0.5264683120230945  
0.4473671800659634 0.9632115325881266 0.9663315678520560  
0.6115156766249179 0.4608810674525706 0.4763076330543263  
0.5577201020737276 0.5326823829176436 0.9600036113727397  
0.3905802124864050 0.0320937250511712 0.4671590159353660  
0.5626340177883761 0.9619284195337771 0.9656584806630216  
0.3843532589417878 0.4788318511037244 0.4451400452437705  
0.4424891893802666 0.5312940043111113 0.9599634964392381  
0.6139194300901635 0.0325952988595933 0.4704234987162729  
0.5633869001056473 0.0292855168983546 0.0243174002246039  
0.3851261331993250 0.5459703192251414 0.5041638569704461  
0.4431953251285316 0.4638345144364002 0.0184751489831683  
0.6135716878211658 0.9646343673378543 0.5279586618306443  
0.8358879490381529 0.1412744976357850 0.1223922671350673  
0.0032976875844603 0.6418316027637910 0.6236340304398711  
0.8359241512258605 0.3574672792783066 0.1266505679343018  
0.9999157483861576 0.8574903147560806 0.6267290666122255  
0.8338892439471732 0.8553756912707959 0.8760478539034137  
0.6690764213156536 0.3572459057699974 0.3703775042920703  
0.8364575788024954 0.6401204357816349 0.8747669372964958  
0.6716025281733363 0.1405946544418099 0.3744601906821486  
0.8355119577603762 0.0677629161413269 0.0583827146330018  
0.0034951860813161 0.5687588464240677 0.5586695115855069  
0.8361709055898109 0.4302651717681513 0.0616048442475827  
0.6708313922261997 0.9281637109385793 0.5569147476452324  
0.8342431496592876 0.9288179103687916 0.9402640992457586  
0.0031270922319138 0.4306268002554555 0.4390186466679502  
0.8365121697259950 0.5676571745963402 0.9407500823725689  
0.6716000767039672 0.0672135084160208 0.4390786498110846  
0.7777702363099552 0.0339435398192645 0.0255698096665054  
0.9459886069895009 0.5314797058445662 0.5334311107696954  
0.8938186678192352 0.4642769816461747 0.02888487016136066  
0.7285394775745613 0.9629075865051389 0.5259943770233483  
0.7771316923933772 0.9661036920013980 0.9677550058223896  
0.9457949452563044 0.4639185628588215 0.4749081889581849  
0.8939658157613170 0.5315012866721704 0.9695568570377742  
0.7288925233181062 0.0308253516388440 0.46827634966637530  
0.8920316840901279 0.9625410851510582 0.9731598353640651  
0.7263356050185122 0.4671944672338547 0.4609985694284826  
0.7788835150020744 0.5336959319913572 0.9738431970197337  
0.9423868461572311 0.0342524816097177 0.4749429377719820  
0.8926411254608190 0.03042228085424445 0.0309400363326430  
0.7265106418596959 0.5342470513608860 0.5206974591884657  
0.7787100670239226 0.4664364126555212 0.0330424512283831  
0.9422784402811977 0.9667151546763996 0.5335071812175004  
0.0009946344700105 0.2284621883775322 0.1107515260476254  
0.1680913982057546 0.7278017151261325 0.6130862312663766  
0.3358489728372084 0.7332970559049907 0.8898660403964535  
0.1667646877116679 0.2679704931305709 0.3897702429527560  
0.0628964686281893 0.0581922787491031 0.0533658601220405  
0.1023714626386398 0.9378823719893656 0.5512809250755757  
0.2292052369514719 0.4287403817209307 0.4841449948389546  
0.2705243123846044 0.5623167719078788 0.9543506861879755  
0.2692569426158572 0.9407581357358420 0.9473413348138211  
0.1056496668716926 0.4435862730404480 0.4360882821153245  
0.0653230637297438 0.5584574144168651 0.9427918813588515  
0.2300795187260626 0.0587784931144289 0.4487435801733119  
0.2682470779582310 0.0608141452601469 0.0530701913112515  
0.1060073829190009 0.5633652175524896 0.5411462720441511  
0.0649960827455439 0.4375380380366219 0.0458407744593105  
0.2312025510508497 0.9387464304486692 0.5554486965831769  
0.2303542034138888 0.5491163917231376 0.5885984293474564  
0.0639168831087792 0.9383978851939112 0.9473214274097193  
0.2701778064750423 0.4415823357965137 0.0572976056594617  
0.1025264595941176 0.0583399952947466 0.4467744604141123  
0.3298800794893451 0.2732619257681637 0.1093126541143480  
0.5016826068282653 0.7634998267235356 0.6022786462950438  
0.6677091175297447 0.7691771228102769 0.8860163183584135  
0.4450904706406703 0.3438257254626600 0.4516426805390596  
0.4032446850004621 0.0576779582456578 0.0479169670868495  
0.4366050170082921 0.9387975632097447 0.5485892880241723  
0.5665550640000335 0.4314943900207317 0.4610308274171972  
0.6024758152560866 0.5597259999072363 0.9366311495535447  
0.6074262472417479 0.9351228861458423 0.9420078896998211  
0.4277759995137336 0.4601661237060878 0.4038779073596758  
0.3971182590423483 0.5569570800762431 0.9365153749740899  
0.5689456428826105 0.0598831485968118 0.4488092015961167  
0.6086170861972056 0.0552092783118708 0.0476783491460777  
0.4290207766010052 0.5788378706312917 0.5100152799250917

0.3982865622431100 0.4369349815956352 0.0414790334929711  
0.5683133511243585 0.93888594125947031 0.5516616678843561  
0.5669772138099588 0.5517712723874681 0.5658048316913782  
0.4020783463479852 0.9371575585780221 0.9433460008599004  
0.6035980362974758 0.4389737691521938 0.0414293747991449  
0.4353521128001006 0.0584619462834228 0.4421056610394868  
0.6706671036925158 0.2222753078597779 0.1104888502451050  
0.8353710316802281 0.7647629544086524 0.6089657794113768  
0.0016409384414395 0.7327363288382553 0.8918654736626058  
0.8353749057420826 0.2245054109514396 0.3868443320537195  
0.7328666267496179 0.0616630768930057 0.0463373016898582  
0.7735774701236001 0.9358892615380997 0.5479777620699325  
0.9006849366823988 0.4359260609606214 0.4562129450935808  
0.9391702954112257 0.5567317744731941 0.9443725759568979  
0.9368870167101105 0.9346089643026556 0.9525693538756093  
0.7711995066669349 0.4433161142666287 0.4315201208835349  
0.7338635410719136 0.5608721279653232 0.9522254132417791  
0.8972583548431335 0.0611636896676010 0.4533409227774746  
0.9380345726823294 0.0552731491429719 0.0559733806242163  
0.7715334764452859 0.5627710491897675 0.5383074733964819  
0.7335879388236821 0.4409551667189451 0.0581746911912771  
0.8970964297464920 0.9412381189020693 0.5582873888243338  
0.9010368450903065 0.5562713283164313 0.5608105183651958  
0.7317486792188496 0.94123239933534059 0.9427507814138811  
0.9388202044710277 0.4370999336075794 0.0506359461927039  
0.7742530161777186 0.0564109614184475 0.4447025216269299  
0.5166535431983724 0.2990786225307229 0.6413954905891286  
0.5064848862664529 0.2736447427140876 0.3872408622687277  
0.4366009640747800 0.2711734729165450 0.6093515503386736  
0.4535137792924941 0.3667925059039546 0.6467768568250490  
0.4201645187415644 0.2461456073151139 0.2450708942500318

Structure CH3OH/3 S=4

1.0000000000000000  
20.9172000884999996 0.0000000000000000 0.0000000000000000  
0.0000000000000000 17.8076000213999990 0.0000000000000000  
0.0000000000000000 0.0000000000000000 12.2158002853000003  
Al O C H Fe  
10 62 97 64 2  
Direct  
0.0847298380358031 0.2491794288328460 0.2537083906742404  
0.2492919934374404 0.7540607279669654 0.7621916548609270  
0.2487045504118294 0.2504113741455385 0.2536214485136148  
0.0835942886251959 0.7514280328501591 0.7567817243014799  
0.5850474426187128 0.7442725810113918 0.7404703271384658  
0.4165024663498689 0.7479259856580134 0.7472366290576585  
0.7567064305274560 0.2460632557791370 0.2504066039114186  
0.9178379023438316 0.7477404217741486 0.7525129053879989  
0.9205034425603258 0.2483530408773656 0.2522292453307588  
0.7517167303871397 0.7447452556221984 0.7497433112302871  
0.6743279839476519 0.2469718776342683 0.1781626292511321  
0.8351382979435200 0.7461968385493148 0.6860100182967214  
0.0003890022836742 0.7487197558375048 0.8202983300198259  
0.8381673527392611 0.2474516521384250 0.3169077148588181  
0.7851179535364988 0.1679950036024926 0.1497646741324744  
0.9487996332215215 0.6699329596975399 0.6509079449669666  
0.8906944847812786 0.3268760842571331 0.1511918391554662  
0.7242954181617600 0.8227647782723954 0.6453955639455541  
0.7781525128094453 0.8264735145848483 0.8510775471816669  
0.9484801024184926 0.3298484085147015 0.3504832007456272  
0.8904884091611072 0.6669073427096596 0.8505460763748978  
0.7283171754625407 0.1649527034790034 0.3464853412702369  
0.8868857645748929 0.8249951348662787 0.8540688954408227  
0.7268935048671237 0.3238115001203951 0.3515049892440505  
0.7818347851278535 0.6668151437050518 0.8507204797092821  
0.9471400504771805 0.1704424351214767 0.3558831333682529  
0.8936681382626888 0.1668995861327121 0.1505104724195656  
0.7239933975888740 0.6646291489712022 0.6515891395543923  
0.7822588260340576 0.3266372966955945 0.1512688601138965  
0.9449760347221970 0.8289485881133337 0.6552624534775429  
0.3362975518334390 0.2554176050609225 0.1883644213035184  
0.5001423319325621 0.7463586336981822 0.6769344315409134  
0.6679246508167100 0.7452944558712737 0.8110665427134529  
0.4179871275766227 0.3126389425330968 0.3372343999152345  
0.4510154269425377 0.1589083440674912 0.1394274261142226  
0.6153929002713161 0.6652507805624527 0.6450661783606716  
0.5647110483056509 0.3290119509785761 0.1352856519143602  
0.3873343072001192 0.8291456912790005 0.6517866875032597  
0.4494420138457502 0.8232686508660841 0.8462420395803213  
0.6181108923568154 0.3255925405052598 0.3503568896413727  
0.5544465794210510 0.6677138940096637 0.8392858930562332  
0.3887479546840648 0.1556908578604838 0.3368568828128773  
0.5582971057325783 0.8240517774414722 0.8396966467997705  
0.339709534509308 0.4024317053568656 0.2465167321184894  
0.4456773407154431 0.6665924334084754 0.8418549656160206  
0.6201379127881288 0.1566556582751306 0.3349969153217285  
0.5601970263685100 0.1645389468584548 0.1253246614164379  
0.3819684995731205 0.6735569652898821 0.6480097714791958  
0.4565132373737471 0.3207875552243660 0.1210451526534884  
0.6154121134006686 0.8228221332476660 0.6395838362665505  
0.0024941481351392 0.2483270654860249 0.1873068912688639  
0.1662656648895190 0.7532272277551038 0.6939369981313335

0.3344984275744934 0.7511902350934202 0.8213059035844069  
0.1663864203499390 0.2486495187934943 0.3202277958094918  
0.1141704342222475 0.1716321228565168 0.1540415063183610  
0.2733508204518243 0.6772527080089488 0.6613140297760376  
0.2204672045968713 0.3251252240627030 0.1449577268647095  
0.0534848751539741 0.8305791735588690 0.6584900269468332  
0.1119919650129391 0.8313527676887114 0.8566387328780818  
0.2652223075812843 0.3363639906273607 0.3521454955017786  
0.2203457587188517 0.6739687219872267 0.8634319885447713  
0.0557051884904318 0.1683887942702375 0.3536685054643462  
0.2206843124553937 0.8312570481162253 0.8597582941614339  
0.0568952258281579 0.3284783838166452 0.3534900441594874  
0.1115739470316572 0.6716614307873000 0.8586706615504056  
0.2816284879732826 0.1735580806888208 0.3554761724152729  
0.2227746196010443 0.1682708666825470 0.1600950118801908  
0.0575524024358151 0.6709931213838860 0.6526133515916470  
0.1120755292107230 0.3297054793274371 0.1528226399884973  
0.2787646645799787 0.8335155448517173 0.6628708711309332  
0.5131130670834884 0.2362060566996313 0.2959187452959618  
0.4842793677587165 0.3649032085184304 0.5087849482669210  
0.4673527239527925 0.3259008123459671 0.6062233910967716  
0.1683534091697729 0.1419619130372518 0.1315392464941420  
0.3258779560287763 0.6484996314826773 0.6281735755049097  
0.1664832475740788 0.3561223261059764 0.1245309042147140  
0.3327720703503729 0.8591338656820771 0.6320010632795112  
0.1659857116200007 0.8594918370664743 0.8830263065304784  
0.0026129049576831 0.3578123560848606 0.3769174285327256  
0.1661251733069830 0.6442690721815250 0.8853912132421456  
0.0014052855309652 0.1412377624092033 0.3802264700222154  
0.1677361980745208 0.0697040549433543 0.0662162982975701  
0.3196881241630928 0.5800171652468842 0.5576582054821795  
0.1667835446472179 0.4301750117297953 0.0622783930310088  
0.9995530581325209 0.9309158521014894 0.56650944077911350  
0.1662956733365898 0.9323138420812036 0.9472577867749573  
0.3051604472050642 0.4565753070383103 0.4154555168130754  
0.1663361269745079 0.5702925530385078 0.9479360889087769  
0.0007253059468746 0.0685432429067031 0.4458799477890324  
0.1097486275222515 0.0359927590588581 0.0346759152093905  
0.2630140022668168 0.5374961666284999 0.5579624087798101  
0.2241095967164231 0.4685867712597785 0.0396864354745627  
0.0573519794588841 0.9642195206053766 0.5328281628831417  
0.1090039872814014 0.9685555954153444 0.9761838332391826  
0.2564376310863778 0.4752028436111649 0.4895252599693158  
0.2237903389305369 0.5371849880671663 0.9836743277754203  
0.0579243015055539 0.0315354150288460 0.4737364084237742  
0.2242884560125358 0.9662205100957230 0.9783648455311286  
0.0603427532074359 0.4691792719180358 0.4642188822236543  
0.1090613618384253 0.5318800760955926 0.9709512379306972  
0.2746058441967611 0.0358389747779761 0.4818478995239363  
0.2250343144587235 0.0336416701283863 0.036825070480691  
0.0607476245407407 0.5367171433349165 0.5228808759414357  
0.1092672567961313 0.4634328374452552 0.0270950438511355  
0.2748880916970249 0.9691664579348463 0.5424890996833914  
0.5061122688585947 0.1345112223029310 0.1076277341446855  
0.6701466783714283 0.6365427386536835 0.6234409296030627  
0.5093353031905163 0.3538061043670427 0.1047659748880686  
0.6703598052782722 0.8506392147424282 0.6172893995216027  
0.5041615333916247 0.8517224917993079 0.8667038356807493  
0.2999632169022496 0.3945631636103529 0.3321117021834211  
0.5005576549320685 0.6390253629740462 0.8650506793727402  
0.3333703609014828 0.1376409787859972 0.3733773426372105  
0.5051757154605850 0.0623620414519389 0.0432911069618389  
0.6710769250569285 0.5635603005343193 0.5593275952017080  
0.5077528971340952 0.4278572663224020 0.0437642299875672  
0.3323645080670635 0.9312590545322244 0.5657811252201224  
0.5046911499841258 0.9249193321890359 0.9286801232352871  
0.6724737142619900 0.4257649426744332 0.4407778805053403  
0.5025414225462574 0.5661522896240183 0.9286406944804271  
0.3319385680229421 0.0666509292981246 0.4420074666764359  
0.4471129004990198 0.0278560461462741 0.0147092987124925  
0.6139788625534519 0.5258101234986071 0.5334024912521135  
0.5641125842668796 0.4650511387837947 0.0123729661143402  
0.3896504517588003 0.9625498969122970 0.5265620342973556  
0.4469851832186047 0.9599499089343154 0.9579478413147015  
0.6144969398916600 0.4580435268666200 0.4755034751036984  
0.5615264360297161 0.5329965693587144 0.9555503319008704  
0.3894296187249127 0.0288126101476164 0.4655834921643275  
0.5626364978228680 0.9598961080672412 0.9565718532459447  
0.3619258549378880 0.4989338545094775 0.4161946371950723  
0.4462025491836239 0.5292360131675403 0.9608087774012515  
0.6161950015654215 0.0264468681140033 0.4612625321377265  
0.562980665233629 0.0278464322669917 0.0131484197605471  
0.3698239737018224 0.5586309315280957 0.4882650528833564  
0.4487068943301938 0.4611896359441794 0.0174677256628348  
0.6149080184859501 0.9593145106853711 0.5203843797815910  
0.8392053172951455 0.1389414657222462 0.1252293703840355  
0.0034373048030334 0.6423529719618450 0.6263815220799103  
0.8366150897179717 0.3552145393684311 0.1258772776046491  
0.9993209568747354 0.8580641081951639 0.6316370845592977  
0.8326962293330418 0.8539602520596654 0.8775777034666927  
0.6728124436801637 0.3529873231972854 0.3759608437576037  
0.8361008975371176 0.6386810552093377 0.8758497398217959



0.6748769222337200 0.1327551641233005 0.3660535589588853  
0.8377953081355980 0.0656308296683858 0.0610778673606164  
0.0036210957504903 0.5694164349220732 0.5608263498819742  
0.8363652933235428 0.4280297831846591 0.0610047249658521  
0.6718184807238458 0.9232138807536173 0.5518456389448588  
0.8338819609697073 0.9271394280607917 0.9423517638616943  
0.0028966182816434 0.4311283176533452 0.4410892300121588  
0.8362586602286623 0.5658447469754203 0.9410568151397106  
0.6744984367678092 0.0602449418284657 0.4313920140453664  
0.7793621912129747 0.0335244086752585 0.0279930797482139  
0.9461134877480151 0.5316311238416227 0.5370224685264088  
0.8938861598167582 0.4623110675822777 0.0281631030098988  
0.7300782619790364 0.9571051959377656 0.5221499698001176  
0.7774566007509138 0.9658187325299111 0.9698800896071900  
0.9457318820950689 0.4640576578426425 0.4784855880966499  
0.8937958973133214 0.5297333951459064 0.9693653289609172  
0.7314741990659285 0.0243370211001544 0.4629850453269425  
0.8922966422789864 0.9591935195038800 0.9756234324769828  
0.7297955639276117 0.4631497890151186 0.4670725250150481  
0.7787414559388783 0.5316348400145641 0.9740641367044701  
0.9429574705104365 0.0353153950585968 0.4797830155268948  
0.8942255423916099 0.0268864727598352 0.0337424809095476  
0.7290716199445796 0.5306535680084108 0.5255505579994180  
0.7788341926311341 0.4642308375762364 0.0328669278209130  
0.9423598891597272 0.9679949750319278 0.5388637546031974  
0.0029000104891378 0.2341361524125274 0.1105950892925446  
0.1679820714137919 0.7294525958911043 0.6224018990943309  
0.3371362973401267 0.7446472270919097 0.9000330564349177  
0.1670894492880465 0.2761424660869078 0.3889917326243338  
0.0649933201036504 0.0634211801521307 0.0571250143597110  
0.1021851118413579 0.9363429934760292 0.5537089710631974  
0.2129075570193348 0.4414643720558815 0.4917399277516877  
0.2687242375326844 0.5661365474518562 0.966951122037441  
0.2690157811853638 0.9387986275793527 0.9557536082026133  
0.1051811540281267 0.4453280549167604 0.4346945372395589  
0.0639891007558106 0.5564333834027663 0.9437275673045565  
0.2297031052688223 0.0646954619167322 0.4644157960738535  
0.2702917171987378 0.0593585970780820 0.0606584790872556  
0.1059937463047339 0.5649877959243795 0.5396001086870189  
0.0643518497022731 0.4346551117025285 0.0445522581262432  
0.2301717630609192 0.9454937679694898 0.5729094661352576  
0.2243834459241504 0.5537472121938329 0.6130976706687521  
0.0637330096956301 0.9430365051467188 0.9519732532699703  
0.2691483082419930 0.4445085512296327 0.0680263041333215  
0.1031936277655280 0.0563726901552599 0.4480169864625924  
0.3375153645287793 0.3086441661867020 0.1646929864621656  
0.4990725074147503 0.7577219043583363 0.5992424656819794  
0.6661670878744470 0.7663206069109503 0.8843651184026791  
0.3913002339313787 0.3527450556314981 0.3009428885396513  
0.4023045011094009 0.0549108200411004 0.0376687146748636  
0.4345990062924127 0.9340277893706228 0.5445750587024958  
0.5695562728836563 0.4288361765341621 0.4595982426143768  
0.6054003678525612 0.5613889316572782 0.9306999927265849  
0.6073962458990987 0.9329744299434793 0.9329600901599541  
0.4000497734198569 0.4843368768354112 0.3593126440272097  
0.4001945763901765 0.5544650422997616 0.9403177894323914  
0.5716557924585327 0.0538362396019398 0.4375188172003460  
0.6079105467470822 0.0549745220089740 0.0352002232716161  
0.4143975902552109 0.5903905380185140 0.4899675963602445  
0.4047353447463604 0.4332060647571442 0.0427006238908261  
0.5693342484078731 0.9340348383782019 0.5434181676493994  
0.5685750806216012 0.5498420496165715 0.5600070596560941  
0.4020657362924093 0.9330157938241606 0.9352415466878753  
0.6101726091692158 0.4400241741080744 0.0328760352415289  
0.4341801808481782 0.0522287442248172 0.4350242846919530  
0.6734661400395546 0.2831897529522351 0.1181667467832670  
0.8352723498290351 0.7593336031284255 0.6088856814761268  
0.0000538187236195 0.7286649066642690 0.8942398234291435  
0.8383549052164255 0.2359307618264624 0.3945539352965533  
0.7350904028025300 0.0627064309035417 0.0485865340650430  
0.7746181301872053 0.9299067166060162 0.5463845215410470  
0.9005570835201020 0.4358165322705122 0.4610832467120111  
0.9389100314661286 0.5552091390797496 0.9442688134774850  
0.9365701249174937 0.9300295953450144 0.9550044566136793  
0.7750995490638380 0.4385985987137006 0.4409291564169691  
0.7336346480904465 0.5587635027623628 0.9528522453606089  
0.8980867768757835 0.0631133822345119 0.4589757218182381  
0.9400688905140796 0.0504350225297671 0.0590648834635432  
0.7738280518412731 0.5588932437809372 0.5458579618794789  
0.7336896627384203 0.4389736770930256 0.0582622984274233  
0.8970380113809781 0.9434224028856685 0.5648223286468996  
0.9012681629268504 0.5560303175344785 0.5656372976892723  
0.7316188783204894 0.9422019156244754 0.9446654142534185  
0.9389996478531465 0.4352935961005930 0.0496476754254716  
0.7771011795307158 0.0496030018070335 0.4402007276142108  
0.5101226300660717 0.3000211396287168 0.6437266717080831  
0.4677742304645545 0.3373892094187114 0.4444445677760076  
0.4320344908735564 0.2812566203704707 0.5905812029670472  
0.4468695201281845 0.3660217640044016 0.6652783739952195  
0.4262022793985302 0.2377501886530737 0.2416125339262376  
0.5887572493095676 0.2445058167734502 0.2411076674961579

Structure TS4 S=4  
1.0000000000000000  
20.917200884999996 0.0000000000000000 0.0000000000000000  
0.0000000000000000 17.8076000213999999 0.0000000000000000  
0.0000000000000000 0.0000000000000000 12.2158002853000003  
Al O C H Fe  
10 62 97 64 2  
Selective dynamics  
Direct  
0.0845898412383121 0.2487790462457866 0.2535315887993193 F F F  
0.2493239766252984 0.7531085051230946 0.7635595831144002 F F F  
0.2478190896424337 0.2503214980050998 0.2539351370183525 F F F  
0.0837934869579300 0.7509263751726891 0.7570191652368834 F F F  
0.5850233875723916 0.7459070794312623 0.7426480193610203 F F F  
0.4165822660126253 0.7484811483217229 0.7488004556115513 F F F  
0.7577811320236663 0.2467586061617055 0.2493298473113015 F F F  
0.9181759114677774 0.7476704414483351 0.7521797999369042 F F F  
0.9210113548988090 0.2484174911347949 0.2520157686321554 F F F  
0.7520342162959608 0.7456761589468854 0.7508968211894853 F F F  
0.6765391640804239 0.2476522786232778 0.1790108729355637 F F F  
0.8353554383934068 0.7464985690973833 0.6861949299343806 F F F  
0.0005932675842288 0.7484062920825636 0.8201838933868117 F F F  
0.8388349456297064 0.2474585287130608 0.3165168616507827 F F F  
0.7860422893638912 0.1682741545775954 0.1488189019199027 F F F  
0.9489769587919241 0.6695887338652895 0.6508498868352817 F F F  
0.8919640008979002 0.3273809961460259 0.1511035635850035 F F F  
0.7246416791104409 0.8232644056038225 0.6461870945493331 F F F  
0.7787614225984996 0.8268788781899730 0.8514189101443534 F F F  
0.9487474051710905 0.3296641684402815 0.3505220550216634 F F F  
0.8907385862676094 0.6672476311438089 0.8502891440205929 F F F  
0.7296657076347799 0.1652086453503685 0.3469523781163062 F F F  
0.8875068000570323 0.8252336043550557 0.8536941205669635 F F F  
0.7289838108983915 0.3259000355989271 0.3518997809485072 F F F  
0.7820881700007689 0.6673739435109098 0.8513330091194860 F F F  
0.9470196914902189 0.1700597766537300 0.3559207901236974 F F F  
0.8945531933294220 0.1671309215460113 0.1496501737325531 F F F  
0.7239281151987953 0.6660868321118159 0.6530466362512755 F F F  
0.7836317360384371 0.3273320363971379 0.1511585157191604 F F F  
0.9454136648493474 0.8284573332950842 0.6547481119880345 F F F  
0.3345595179104492 0.2557300570210543 0.1913631107370790 F F F  
0.5002929964592298 0.7475278692384961 0.6786982491072777 F F F  
0.6680327835471260 0.7467582667632442 0.8125486642199178 F F F  
0.4084949127810162 0.3121467005151288 0.3530438257401229 F F F  
0.4488131059642271 0.1615592317201759 0.1439067634580624 F F F  
0.6152920841973639 0.6665399920621411 0.6465914455792472 F F F  
0.5624862587192823 0.3305935920071761 0.1414858801901602 F F F  
0.3868817146478776 0.8289476050102209 0.6533900169069113 F F F  
0.4492127998150011 0.8245834579062148 0.8475958582886562 F F F  
0.6205710613982944 0.3253013973727690 0.3562186144662789 F F F  
0.5546503007215762 0.6685174221167856 0.8409095817654517 F F F  
0.3864001843929259 0.1570975539630481 0.3458316322752637 F F F  
0.5580395278298340 0.8261225062782458 0.8414572070071102 F F F  
0.3318134004231155 0.4034668303186066 0.2433444829336651 F F F  
0.4459110390445389 0.6672640691619520 0.8429098545981972 F F F  
0.6213178613595431 0.1602959513630609 0.3436621767684755 F F F  
0.5577018857421265 0.1641833157993489 0.1354378660053612 F F F  
0.3824924330522990 0.6734624207873949 0.6484997193722322 F F F  
0.4537256397879759 0.3272994934045883 0.1363431229186531 F F F  
0.6157128884059304 0.8238337264674271 0.6408290525697211 F F F  
0.0026685886300513 0.2478437653946060 0.1872366391417941 F F F  
0.1664629807230753 0.7523339004144631 0.6946013167728537 F F F  
0.3346428634131158 0.7506407442137757 0.8227919134863058 F F F  
0.1657169808280230 0.2485246860387775 0.3203713782064668 F F F  
0.1138891267799380 0.1709361213613718 0.1542033071562585 F F F  
0.2738325992482942 0.6765636671209023 0.6622570350111445 F F F  
0.2194393579936644 0.3237492265782791 0.1433867859019031 F F F  
0.0539175184082552 0.8301628077080494 0.6583814120080191 F F F  
0.1119064324130434 0.8306621443091231 0.8570265277220912 F F F  
0.2633472723712913 0.3377215039535670 0.3503938560599167 F F F  
0.2205045000322201 0.6730758887611330 0.8640037863025540 F F F  
0.0555612639202181 0.1680049059744135 0.3537512523568296 F F F  
0.2205619519028303 0.8301388463468555 0.8612105923731619 F F F  
0.0570888186302057 0.3280838558575780 0.3537482979585889 F F F  
0.1117146114635474 0.6711329518468503 0.8590151924557503 F F F  
0.2788027824374169 0.1727501408005452 0.3582956442571898 F F F  
0.2224338362387215 0.1672669719817748 0.1612271265723919 F F F  
0.0577314317947639 0.6705246459650809 0.6528973668396176 F F F  
0.1111864622834489 0.3292632804031683 0.1525256618637840 F F F  
0.2783180719579619 0.8323262639069995 0.6648182926208435 F F F  
0.5062858290682712 0.2408464395888039 0.3085936949209622 T T T  
0.4936004958676765 0.3353071737957156 0.4508277565350012 T T T  
0.4708404300434890 0.3128850949889616 0.5537514646469476 T T T  
0.1680962015598695 0.1410519531450518 0.1323215614692330 F F F  
0.3264410057224794 0.6482908205379232 0.6286225008206117 F F F  
0.1656676562132873 0.3552021670018775 0.1236039853618038 F F F  
0.3320892735948959 0.8583606063665741 0.6337052446732443 F F F  
0.1658958001445328 0.8585569239585098 0.8840594736995016 F F F  
0.0028812275704055 0.3574908979602043 0.3771684732198750 F F F  
0.1661536726233734 0.6435110707977216 0.8857370386036081 F F F  
0.0013042850701908 0.1408166251547769 0.3802074213952551 F F F  
0.1675191937843366 0.0686614108795496 0.0672766474005755 F F F  
0.3200774108103346 0.5800859510687673 0.5573199864282969 F F F

0.1661674813321738 0.4292558338864865 0.0614986462022173 F F F  
0.9999369202947577 0.9303793720253282 0.5660875239339731 F F F  
0.1661788644278417 0.9312575954476259 0.9484525304309699 F F F  
0.3045734552824513 0.4572272509888435 0.4135595641094767 F F F  
0.1661816670674128 0.5694944683604817 0.9478881060158102 F F F  
0.0007422317060346 0.0680418765228978 0.4456418204597341 F F F  
0.1095501960051593 0.0346718978903837 0.0362994998888055 F F F  
0.2635153228123812 0.5373869986240010 0.5581461661748222 F F F  
0.2236444146576062 0.4674146949575118 0.0392072969006492 F F F  
0.0576600732694317 0.9639788313103992 0.5326800527767688 F F F  
0.1088520877801571 0.9672241874356544 0.9778495088307864 F F F  
0.2564937978343877 0.4754490846160664 0.4890648671620781 F F F  
0.2235389566027166 0.5361290681639872 0.9835470539125595 F F F  
0.0580502429417535 0.0313230870779364 0.4736667533075476 F F F  
0.2241618962939924 0.9653624775438558 0.9791432598087297 F F F  
0.0606490388944891 0.4686751180791759 0.4648074896340759 F F F  
0.1087678073011134 0.5313020913941173 0.97059597582632287 F F F  
0.2722008093865469 0.0343749099536410 0.4847200489567811 F F F  
0.2248518525173111 0.0328159727120294 0.0375219952991017 F F F  
0.0610166531807366 0.5362024557981897 0.5234798350208294 F F F  
0.1087514379021997 0.4627648034145366 0.0264379969236401 F F F  
0.2730971123701167 0.9674940414397142 0.5447661640997765 F F F  
0.5037004732731347 0.1349512139806635 0.1149577524556520 F F F  
0.6700928198248306 0.6381395606485682 0.6248695772494557 F F F  
0.5073305301373168 0.3568575430438372 0.1136326301683965 F F F  
0.6707579908506887 0.8511671878986675 0.6179458638368587 F F F  
0.5036986485056403 0.8534938714193743 0.8685721511515965 F F F  
0.2986482016089980 0.3954177435899737 0.3294668011104207 F F F  
0.5007584857504810 0.6399139157284575 0.8660552519389100 F F F  
0.3305007337588108 0.1375365262096508 0.3783152039264621 F F F  
0.5029895842898000 0.0628182225884117 0.0502832001468292 F F F  
0.6715161581047937 0.5653001038644163 0.5605018196866212 F F F  
0.5063307917242881 0.4294174723880744 0.0482712575089224 F F F  
0.3309577661947287 0.9302734374221089 0.5675416413185843 F F F  
0.5036766215512856 0.9264484337195000 0.9316430172141921 F F F  
0.6744619794639206 0.4273522616800705 0.4427092093219400 F F F  
0.5023680932033443 0.5664006038799556 0.9291841550529725 F F F  
0.3292838093265189 0.0659457529419640 0.4453056101837376 F F F  
0.4453206281881350 0.0276706618967211 0.0211426905994898 F F F  
0.6147230003003159 0.5272005366679693 0.5337784525663949 F F F  
0.5629823251491999 0.4651823787700522 0.0148694033924031 F F F  
0.3879708264101680 0.9620740193198714 0.5282198928133539 F F F  
0.4457331367470303 0.9604243355809672 0.9625152142985698 F F F  
0.6160960889680567 0.4594277924697465 0.4760620302096825 F F F  
0.5610384063611491 0.5324967385164072 0.9562508384080459 F F F  
0.3871288319734205 0.0285756338073426 0.4680045248907660 F F F  
0.5612716257434087 0.9621877659323061 0.9598830483630607 F F F  
0.3611156038497541 0.5000284423683752 0.4134222481172856 F F F  
0.4457255418311661 0.5302618027259811 0.9618526655106905 F F F  
0.6172977346630404 0.0269321052199132 0.4615890391957578 F F F  
0.5609869176962050 0.0293771154008553 0.0184941925142184 F F F  
0.3695956829044036 0.5592888932034299 0.4862019004712437 F F F  
0.4476212571841742 0.4629919406476262 0.0205678986367417 F F F  
0.6157351528151125 0.9595049017308170 0.5198942001249378 F F F  
0.8400885068671329 0.1392113809484243 0.1243225077599348 F F F  
0.0036229946891595 0.6419165897441488 0.6265767268861850 F F F  
0.8379505276951988 0.3558121749679444 0.1257173394401008 F F F  
0.9997887348292309 0.8575900580267231 0.6312750525689736 F F F  
0.8334366278470853 0.8543066178895842 0.8774496596670005 F F F  
0.6751282742440665 0.3542184326599838 0.3789134676460151 F F F  
0.8363944151348406 0.6391076610263511 0.8759515528917206 F F F  
0.6762170974964476 0.1341497714338686 0.3698431014281454 F F F  
0.8386559901696202 0.0659479201639499 0.0602141974813009 F F F  
0.0038532636555999 0.5689313084473895 0.5612099406425912 F F F  
0.8375295346860057 0.4285279975542551 0.0607603304416102 F F F  
0.6725175205671761 0.9233779540427989 0.5518312844056013 F F F  
0.8347036031202890 0.9274867956134756 0.94190091919776263 F F F  
0.0031980979325112 0.4306963935540935 0.4415140488147813 F F F  
0.8367996707131624 0.5662560525918536 0.9409522477986840 F F F  
0.6757612194315570 0.0608763546948836 0.4329787326139467 F F F  
0.7801820540045199 0.0338646063249968 0.0273189430451239 F F F  
0.9463578659753651 0.5311526992206907 0.5373410087161261 F F F  
0.8948987423936998 0.4628065333600588 0.0272677550680385 F F F  
0.7309410947137707 0.9570310126413304 0.5224775567189894 F F F  
0.7782586320725216 0.9661225244608431 0.9693713678480123 F F F  
0.9460144575572897 0.4635852016504245 0.4788214690156778 F F F  
0.8945031405567505 0.5302135463715132 0.9684838591045590 F F F  
0.7326008497402725 0.0244957733815383 0.4639653179884533 F F F  
0.8931559103087352 0.9595329673999373 0.9749167041533511 F F F  
0.7313544725043357 0.4654562690085200 0.4691607733076069 F F F  
0.7794316449134442 0.5320194148405832 0.9745694023676208 F F F  
0.9430614021998736 0.0344764928719314 0.4791779044224072 F F F  
0.8950938525593983 0.0272612278564424 0.0328782700702135 F F F  
0.7298520815991836 0.5331065811592239 0.5272387006336388 F F F  
0.7798243907147437 0.4646053325329262 0.0333121922078021 F F F  
0.9426402421767790 0.9671322696157318 0.5381727207685785 F F F  
0.0030572731963687 0.2324758016005504 0.1110134841041202 F F F  
0.1682939715265945 0.7286035072395123 0.6230531128770096 F F F  
0.3372198810745743 0.7400919244748536 0.9006083457984602 F F F  
0.1663358908428378 0.2770646502635756 0.3882220193429191 F F F  
0.0647774633045017 0.0619009219069895 0.0591453626966114 F F F  
0.1025657366017541 0.9363247605022380 0.5537280455735072 F F F

0.2129900195326044 0.4416851412296907 0.4919293076054814 F F F  
0.2685524872969154 0.5649739701072249 0.9670808975707530 F F F  
0.2689032531688440 0.9380847876648986 0.9562263620581746 F F F  
0.1054934457243846 0.4447835252253824 0.4353685670126808 F F F  
0.0638052772282691 0.5561380999154437 0.9433964499308729 F F F  
0.2271192399277666 0.0629156425861837 0.4675672837532332 F F F  
0.2700878889179279 0.0587617465303794 0.0609420017064863 F F F  
0.1062469695503481 0.5644613174206157 0.5403659052139602 F F F  
0.0637709866242488 0.4341053459785158 0.0437999980423172 F F F  
0.2286534820723531 0.9431496071701702 0.5752132529850087 F F F  
0.2252280200416266 0.5532612364447331 0.6142289261153380 F F F  
0.0636107297641004 0.9414674457831893 0.9540138705995531 F F F  
0.2685542098731659 0.4430641868993703 0.0676520617211054 F F F  
0.1032418378783149 0.0564459005115694 0.4481363935381069 F F F  
0.3364218314423795 0.3101295972663181 0.1725843037879642 F F F  
0.4992857302579736 0.7588666256371539 0.6009981536271667 F F F  
0.6664943857846310 0.7681117654361884 0.8856700764355807 F F F  
0.3978778974465200 0.3588900938936561 0.3118360201652450 F F F  
0.4002989226790845 0.0538657290152642 0.0451111905686830 F F F  
0.4331019853262390 0.9337984522860125 0.5456979125557737 F F F  
0.5716453615461958 0.4302430494465810 0.4564020077228577 F F F  
0.6052071169116289 0.5599033765844297 0.9305341238085134 F F F  
0.6063233542973379 0.9365329115175882 0.9349017625363558 F F F  
0.3984647707587641 0.4865675094169006 0.3543562808284904 F F F  
0.3999125715055385 0.5556432344048474 0.9405053241791563 F F F  
0.5728763617361849 0.0544167820625319 0.4374324603150583 F F F  
0.6056976847917213 0.0569807777412805 0.0407378462398640 F F F  
0.4140034764315459 0.5914133157463084 0.4868334814327824 F F F  
0.4034351729544738 0.4358542918787904 0.0467152749020983 F F F  
0.5700855337936019 0.9340663114385848 0.5420795350705774 F F F  
0.5691386519333648 0.5513156643273334 0.5593472549195155 F F F  
0.4009760137374485 0.9332292295867148 0.9395278664117512 F F F  
0.6087996493670786 0.4396679412818116 0.0357972367826278 F F F  
0.4316043196452455 0.0526020188187672 0.4373102613947495 F F F  
0.6758163447927359 0.2786241158345817 0.1132723464807697 F F F  
0.8353198472712862 0.7603226550469557 0.6093255278006922 F F F  
0.0001105423146441 0.7285884760450827 0.8942522903887067 F F F  
0.8389740395058496 0.2311111619327946 0.3923130786678755 F F F  
0.7359210146319199 0.0630438909698654 0.0479777812575222 F F F  
0.7753658800201180 0.9295583220193109 0.5466579634801505 F F F  
0.9008940225951534 0.4352605410449542 0.4613002652875551 F F F  
0.9394825757246323 0.5557457471016889 0.9428103249725552 F F F  
0.9374039436468067 0.9303363726273304 0.9542462151385891 F F F  
0.7769353030003785 0.4414370305351056 0.4433701906604739 F F F  
0.7342332481791232 0.5591559189552058 0.9539562515778854 F F F  
0.8981221849617924 0.0620307060950154 0.4581374789856341 F F F  
0.9409174973811361 0.0509002527837410 0.0581068423260476 F F F  
0.7742389168577475 0.5620930451365567 0.5476797223245669 F F F  
0.7348310261658852 0.4392379490156131 0.0592650950752329 F F F  
0.8973874256548982 0.9422706803583765 0.5638847585571582 F F F  
0.9015094632511591 0.555572522211763 0.5658920628423729 F F F  
0.7324318785755040 0.9424196730347134 0.9442797596586630 F F F  
0.9400936229144889 0.4357924393359625 0.0482530495329030 F F F  
0.7782886550045305 0.0497005133064121 0.4414029448374208 F F F  
0.5115489400201181 0.2903963884202740 0.6018969442741127 T T T  
0.5028610209703326 0.2841602685250342 0.3843281385439507 T T T  
0.4349699132273028 0.2676431543409328 0.5470902836856094 T T T  
0.4504590543790559 0.3614370348081846 0.5973181376271247 T T T  
0.4228425071595310 0.2389275694581878 0.2505252053102025 T T T  
0.5904326878034784 0.2456002707075080 0.2468438685774056 T T T

Structure 6 S=4

1.0000000000000000  
20.9172000884999996 0.0000000000000000 0.0000000000000000  
0.0000000000000000 17.8076000213999990 0.0000000000000000  
0.0000000000000000 0.0000000000000000 12.2158002853000003

Al O C H Fe  
10 62 97 64 2

Direct

0.0849579009839374 0.2487648751168909 0.2537756945701268  
0.2492798742622388 0.7529115598762959 0.7634608069617741  
0.2477813449586924 0.2498406898766300 0.2542483638936254  
0.0837569299086379 0.7508941225618718 0.7570594110681915  
0.5850511450221667 0.7456675789228857 0.7413297067944297  
0.4165123064715158 0.7482747065165440 0.7477792090318554  
0.7593019403172062 0.2465301497849119 0.2492109590509025  
0.9181463629430396 0.7476877086917896 0.7518344233881359  
0.9219653237839198 0.2485276322429336 0.2518304929188279  
0.7519912356120817 0.7452476873169652 0.7500994000631841  
0.6797069473321538 0.2480742967276441 0.174773526725954  
0.8353044493661343 0.7462784119782058 0.6856434620848239  
0.0005771854703416 0.7484245575773625 0.8200691257134445  
0.8400061618325417 0.2478691067709731 0.3165851925461990  
0.7877126785102992 0.1679843698971996 0.1488735716692928  
0.9489976773799857 0.6696697285924269 0.6506239898723823  
0.8935736277964184 0.3276118152140416 0.1506235424710258  
0.7246683247402330 0.8228756377571088 0.6455027133655672  
0.7787048344030032 0.8267452055613903 0.8510112361515263  
0.9493297974807506 0.3297481098314940 0.3504837021243446  
0.8907639417109560 0.6674080968119281 0.8498782525657019  
0.7312339635822073 0.1651509388557806 0.3465604604596384  
0.8874451278813903 0.8249893307496476 0.8532044058177830

0.7288082718217092 0.3251957734357340 0.3511468077839267  
0.7821048645230142 0.6671630401711632 0.8508479432752203  
0.9475530366824714 0.1702209057128195 0.3560566467190823  
0.8961196451543026 0.1668508105046831 0.1494102418655540  
0.7239550467604309 0.6651430929366891 0.6523527276064217  
0.7853321193529842 0.3275506265838049 0.1513568325811309  
0.9454074770344959 0.8284688768846075 0.6545402873550321  
0.3348273988525834 0.2558794148295765 0.1899371952474720  
0.5002980083976249 0.7473240899766145 0.6774230982354088  
0.6680115793198159 0.7463620461190535 0.8115125850542525  
0.4087357760834347 0.3108221378686153 0.3497641076447439  
0.4473795449275637 0.1610569423790168 0.1438918604572010  
0.6153449602148570 0.6659978043238036 0.6455151403949273  
0.5626376245848919 0.3301974545929109 0.1373898414400599  
0.3866927729279203 0.8288120495392535 0.6528281470418100  
0.4491947391012063 0.8239375327842197 0.8468403786653029  
0.6203229479369745 0.3245815860624054 0.3523332570471215  
0.5546214650746203 0.6686602148046337 0.8398130005921096  
0.3852143781108607 0.1545702480143903 0.3411372229799031  
0.5580118644620830 0.8259368770716574 0.8405386439874627  
0.3315438553133260 0.4031671074258765 0.2437676002175028  
0.4458685866660995 0.6671865661248533 0.8415785594323928  
0.6233050147216658 0.1577088665006008 0.3349035685313832  
0.5559791133683221 0.1656328736480764 0.1309817906725970  
0.3823058727712221 0.6733553088539829 0.6477332251917310  
0.4539785468826597 0.3261876205537941 0.1320995144883267  
0.6157678410587573 0.8237738123483417 0.6399072935306407  
0.0034498594228686 0.2479197849572322 0.1872483232100626  
0.1664014145101857 0.7522040915042465 0.6946582490015373  
0.3346149465158759 0.7503591953856729 0.8222541226545396  
0.1658462179270909 0.2484181890767090 0.3205135174972339  
0.1140687893521512 0.1708692455720353 0.1542271101832684  
0.2736622611337896 0.6762816857874987 0.6621390802470977  
0.2198721624273217 0.3238875555681450 0.1440775771531830  
0.0539134221814087 0.8301350353540743 0.6583871170904713  
0.1119265572440761 0.8306216143986010 0.8570165817976992  
0.2635042159586500 0.3372145610407394 0.3511691917041965  
0.2204567902212095 0.6729819521265026 0.8639984356311219  
0.0560435705806915 0.1679513419639793 0.3540285996390147  
0.2205847249250780 0.8300173300980972 0.8611856418842208  
0.0576270567816266 0.3282208159916389 0.3540303991833708  
0.1116620215099486 0.6710223763332452 0.8591416873932285  
0.2782288184169248 0.1728712881658259 0.3579969328402500  
0.2225915406551685 0.1674085102198497 0.1605590498297017  
0.0577492909690691 0.6705751655058355 0.6529390086055155  
0.1116183092556449 0.3291863458394322 0.1526705819761862  
0.2781409361394073 0.8320107323866092 0.6646871093584383  
0.5060112952363292 0.2372721233095879 0.3097871086539875  
0.4960670118499229 0.3335458163302781 0.4794941422901449  
0.4672887710675958 0.3206468027039143 0.5789217911747958  
0.1682335279338855 0.1410647865601417 0.1319661732387818  
0.3262569575826502 0.6480968395810428 0.6282500226294861  
0.1660704764451284 0.3552422697665163 0.1239782468258462  
0.3318555674849189 0.8582143419619539 0.6335015209596868  
0.1659283570239915 0.8584952248972211 0.8839845981018871  
0.0033941131306681 0.3576242781349041 0.3773071301936541  
0.1661100089553436 0.6434280637900257 0.8858181833863484  
0.0017552888546828 0.1408283979129743 0.380416904439260  
0.1676187923911895 0.0686938128980220 0.0669487412935940  
0.3198742765334601 0.5798334762921650 0.5571343927857882  
0.1664834708646516 0.4292549020958452 0.0618092578765380  
1.0000169729742467 0.9303887318212289 0.5660994292107790  
0.1662391580716428 0.9312527016588309 0.9482602824282806  
0.3042892947131173 0.4570010554764003 0.4138025900246675  
0.1662315478056745 0.5694311454803602 0.9480464685923750  
0.0010226786306446 0.0680541701246403 0.4457718879678493  
0.1096389072081074 0.0347460134782615 0.0359672505581360  
0.2632259421764616 0.5373118567842676 0.5580008487327077  
0.2238905430970091 0.4675193472608338 0.0394017108452465  
0.0577865641664691 0.9638788145778352 0.5327495455407035  
0.1089166242016177 0.9672779470755557 0.9775735471104935  
0.2561478079302627 0.4753400944696599 0.4890717498520198  
0.2236512873813589 0.5361984963928631 0.9836576817622343  
0.0582777630971019 0.0312271753333030 0.4737805790403171  
0.2242281562700360 0.9653268024781430 0.9789616359987056  
0.0609078996017415 0.4688899408095161 0.4649324484762553  
0.1088824871592180 0.5311294841518952 0.9708572883152635  
0.2714286524924297 0.0340388375257625 0.4847499725326852  
0.2249440761128626 0.0328005968574614 0.0372796172031249  
0.0611616434441438 0.5364186376503352 0.5235580985407932  
0.1090012374778894 0.4626180869472210 0.0267662419294042  
0.2725551033615054 0.9672779683866096 0.5451075707180997  
0.5021736998945142 0.1354310314930879 0.1125087483028201  
0.6700759724072834 0.6372893588776570 0.6240610169274832  
0.5074108615384936 0.3563006710655882 0.1099355576573258  
0.6708721416474576 0.8511076793925714 0.6173625837580974  
0.5036088957010111 0.8530057704788901 0.8678336663354156  
0.2982797619635779 0.3951908901291018 0.3300388282316132  
0.5007489423998749 0.6396607435047693 0.8649809659338494  
0.3297693838874025 0.1365985430393734 0.3764541120849189  
0.5016184427557406 0.0630819167842359 0.0480610370080956  
0.6712921412111866 0.5642751249543447 0.5597922315071858

0.5062638400638372 0.4292979651304367 0.0457668823915961  
0.3305087596034261 0.9301914808359878 0.5676326987444854  
0.5032137090187483 0.9259838007242691 0.9308969661788629  
0.6737391074577093 0.4263037301455083 0.4414435400175857  
0.5023646009557217 0.5667179116576130 0.9282174089534205  
0.3283763859047600 0.0655183864334867 0.4446518501309762  
0.4441850899951437 0.02727773320193721 0.0191042961166407  
0.6144020430578360 0.5263371541739083 0.5329938393225881  
0.5629566536629916 0.4653377372156030 0.0132163408739192  
0.3874155733668638 0.9621105352792758 0.5280874448186861  
0.4450663876514273 0.9597195970509969 0.9611973125362918  
0.6154954587633884 0.4586087231426939 0.4750008364918131  
0.5610515796627483 0.5329183350921908 0.9553206023925803  
0.3863177836243382 0.0283932548140704 0.4674334382313091  
0.5605657647120936 0.9621651167411164 0.9592726366987471  
0.3610276475289325 0.4994467309591356 0.4137542159070440  
0.4456849132142135 0.5305499823012714 0.9605423911976751  
0.6183058706636865 0.0270571907035460 0.4601349081580905  
0.5598230689542421 0.0297305711669679 0.0169943350787506  
0.3694966306967581 0.5587965155272713 0.4863643517801231  
0.4475588905538471 0.4630037471602003 0.0185096194377451  
0.6163436158338602 0.9599571663626869 0.5192783909325386  
0.8416524275006620 0.1388460724044601 0.1242305796038717  
0.0036394502439060 0.6419949518401201 0.6265012923043223  
0.8395202737405957 0.3560975019028578 0.1255752368806690  
0.9997906606636058 0.8575863163359487 0.6312100933785735  
0.8334129470243477 0.8540820800751729 0.8770830900586117  
0.6746582876365804 0.3533676780216027 0.3769747666514774  
0.8365060485079933 0.6391380463840834 0.8755716549694427  
0.6776660350130788 0.1330975783650988 0.3662458200342809  
0.8399133520821284 0.0655653453220885 0.0601935718073081  
0.0039416415020854 0.5690329219578171 0.5611780386862226  
0.8388030538255772 0.4288075335096205 0.0606813910379868  
0.6729075753221095 0.9235038084722502 0.5516365339899868  
0.8349979119150104 0.9271913747375130 0.9417332618106731  
0.0035178951693734 0.4308154409946969 0.4416064946154136  
0.8372156281341018 0.5664031599988101 0.9407330078113683  
0.6769322906356974 0.0605179937325292 0.4312726440557206  
0.7812116497751002 0.0338743352983526 0.0276287535827900  
0.9464858851209760 0.5311793255018691 0.5372603544375736  
0.8959605487262529 0.4633972671718428 0.0268707190754385  
0.7314981025628100 0.9569091814990051 0.5226253975866281  
0.7788077993643507 0.9661826257403995 0.9696042546924846  
0.9462580098480842 0.4635961514514572 0.4787807503287717  
0.8951417374560044 0.5307652885775626 0.9680252318679200  
0.7335425371726544 0.0241421316613422 0.4635432472636721  
0.8936776658485502 0.9588215847773642 0.9744876686770225  
0.7307129687585465 0.4641468517796243 0.4681949483698194  
0.7800603686227342 0.5318744437531142 0.9746830440665623  
0.9432829894489958 0.0346004352242608 0.4792409493060715  
0.8960944791678019 0.0265062122010044 0.0325157121030045  
0.7294885447872322 0.5317361212906633 0.5264667388239955  
0.7808798145046920 0.4645245053499449 0.0335406078952296  
0.9427589032076666 0.9672397685878995 0.5381928878518814  
0.0038449281918394 0.2324339113414398 0.1110846336023948  
0.1681880695845186 0.7287098841272779 0.6229460952209878  
0.3373987928898726 0.7402445211312250 0.9001679483511394  
0.1664563687117259 0.2762689170631367 0.3889527530652204  
0.0648771620044361 0.0620225866701505 0.0587778651452903  
0.1026496767277771 0.9361316233101036 0.5538066309267206  
0.2126135629879061 0.4416328659044588 0.4917762259814210  
0.2686146366089610 0.5651226009476747 0.9670877804070442  
0.2689619537987372 0.9380013301082939 0.9561203653088961  
0.1057685055565373 0.4450420828647318 0.4355207394823609  
0.0638690252301355 0.5558499331658410 0.9436829008266658  
0.2262446155633190 0.0624085626390964 0.4677753932375662  
0.2701760130601235 0.0587182164615998 0.0607750197569398  
0.1063362413923253 0.5647849412044960 0.5404990376490656  
0.0640765794279097 0.4338535971609717 0.0442054113911053  
0.2282201282109625 0.9428803773730429 0.5759343034692981  
0.2249250511527331 0.5533897085358366 0.6139194739000763  
0.0636661083438164 0.9415524326484773 0.9537338549675767  
0.2688477201613109 0.4432819710832842 0.0678079279927363  
0.1034910138416989 0.0562848514724411 0.4482513053027105  
0.3359974717937129 0.3101506784296594 0.1703506710380009  
0.4992876952721418 0.7590077717686983 0.5998242533798787  
0.6664020853018127 0.7675510112803144 0.8847289560969092  
0.3919257334922285 0.3549671544731580 0.3076625509759577  
0.3989282887564244 0.0531174868734504 0.0425598562576414  
0.4326440965555025 0.9340647367680779 0.5455987786858137  
0.5708357105330258 0.4297014555875439 0.4557912680001236  
0.6051979136086703 0.5606001550598181 0.9301231471302376  
0.6057955100872702 0.9365392500098192 0.9351511161643185  
0.3985085630795217 0.4854478241654123 0.3552096163028169  
0.3999223072752349 0.5561464636250694 0.9394346604917062  
0.5740475994643091 0.0546690910011220 0.4353869684856577  
0.6044069831426903 0.0576164558180192 0.0391954495309293  
0.4139726146404393 0.5907862989231363 0.4871713905001831  
0.4033868132652426 0.4356991522726884 0.0443368796847695  
0.5705204659069789 0.9349870021467139 0.5415635408961840  
0.5688798223321142 0.5505500004884296 0.5586937129473090  
0.4005040542468524 0.9320208358700256 0.9383364851916692

0.6087391523425233 0.4397720060184354 0.0342167975434387  
0.4306522683414598 0.0524763830381931 0.4362462425676833  
0.6816667542464130 0.2791292613454838 0.1092218437589863  
0.8352661990554783 0.7602410723130686 0.6088242410561974  
1.0000037181860637 0.7286349189811043 0.8941515081226047  
0.8403361872975142 0.2308959435184654 0.3920926703588151  
0.7371494946734518 0.0633581207498817 0.0486072790833038  
0.7757679696953862 0.9293365384307455 0.5474031419312619  
0.9011680013609783 0.4352102698929352 0.4612035336034279  
0.9399272969124641 0.5566051017812313 0.9420433624565123  
0.9377226078291718 0.9293176497001854 0.9535092182949130  
0.7761835975154916 0.4398650468200516 0.4423489497428101  
0.7347008804235106 0.5587029851900011 0.9542267532848093  
0.8983754120712293 0.0622337452475336 0.4582028421806856  
0.9420986983899968 0.0497935200473756 0.0574869021979513  
0.7740390595853849 0.5603679471333035 0.5469247585186597  
0.7360542724129356 0.43891985676889331 0.0598359375733502  
0.8974744118960823 0.9424493475167520 0.5638707563124046  
0.9016028547691398 0.5555549189192951 0.5657289167237889  
0.7327980168436234 0.9428373474821832 0.9447630460632765  
0.9413226581321673 0.4366850671543496 0.0476197811436064  
0.7794135584650081 0.0490305971485908 0.4413249689619148  
0.5034439357702956 0.2937273310258325 0.6336333315415643  
0.5038372390574750 0.2701044983656006 0.3774847503673545  
0.4287900923798075 0.2779472611352338 0.5720842158169144  
0.4492727094325489 0.3721569299537662 0.6189144325674647  
0.4221046017732153 0.2393602096001645 0.2494899471585936  
0.5928714395860155 0.2452320351333060 0.2392837921502221

Structures TS5 S=4

1.0000000000000000  
20.9172000884999996 0.0000000000000000 0.0000000000000000  
0.0000000000000000 17.8076000213999990 0.0000000000000000  
0.0000000000000000 0.0000000000000000 12.2158002853000003

Al O C H Fe

10 62 97 64 2

Selective dynamics

Direct

0.0850383235633743 0.2484632928087649 0.2541543991331849 F F F  
0.2493362395183070 0.7529155926140447 0.7639570122804358 F F F  
0.2477381576590432 0.2496651783696677 0.2560893226127163 F F F  
0.0838097594751446 0.7506852551835337 0.7574024133007384 F F F  
0.5850760459580187 0.7457679083210706 0.7414943796547178 F F F  
0.4166588364481854 0.7485681145607330 0.7483727700280909 F F F  
0.7596217212162344 0.2465993146999139 0.2488415887820068 F F F  
0.9181674960353874 0.7474566341090991 0.7517577047076287 F F F  
0.9221130045230481 0.2484875023556938 0.2515263372328249 F F F  
0.7519648099816294 0.7452997967999764 0.7499693798984950 F F F  
0.6798006360247655 0.2471691100915692 0.1739104067271171 F F F  
0.8353344381758703 0.7462391366714911 0.6855011244569553 F F F  
0.0006343100582811 0.7481776609863715 0.8201687410190672 F F F  
0.8403009952892262 0.2474823966079072 0.3163560327908144 F F F  
0.7879963338429192 0.1681005442584507 0.1480848528951739 F F F  
0.9491511149349634 0.6693499485436476 0.6507493033577489 F F F  
0.8936957473805975 0.3277668445702062 0.1508299228846113 F F F  
0.7245725440220454 0.8231565021228420 0.6454563344418602 F F F  
0.7788215728431496 0.8267770770381162 0.8507711644930254 F F F  
0.9496243637931201 0.3296459297143528 0.3501416991175148 F F F  
0.8907656005443982 0.6673279753764305 0.8497628052510180 F F F  
0.7317762989387191 0.1652203845009907 0.3460651352132160 F F F  
0.8875707947388563 0.8248914143202413 0.8529487404434306 F F F  
0.7293916842532226 0.3252512886408425 0.3503418819451127 F F F  
0.7821095023151230 0.6672103842092483 0.8508475441677845 F F F  
0.9475240518047698 0.1698764254825988 0.3558539100753606 F F F  
0.8964201310875168 0.1669597164516148 0.1485943711403763 F F F  
0.7239858645676733 0.6653709023925387 0.6523010973695946 F F F  
0.7854643952596163 0.3274015693647243 0.1509856000090721 F F F  
0.9455640230730822 0.8280545303481190 0.6543079955901803 F F F  
0.3362152274866972 0.2578360446800403 0.1970378983684995 F F F  
0.5003105689930578 0.7477409698448341 0.6777168783368168 F F F  
0.6679990067275554 0.7464669528056831 0.8115929614183983 F F F  
0.4162241354577205 0.3203519271633614 0.3444929552351103 T T T  
0.448288562337273 0.1614721919443056 0.1457623903532408 F F F  
0.6154021523460997 0.6663085123829475 0.6451489736441403 F F F  
0.5627048249369793 0.3294691252691848 0.1358863287471266 F F F  
0.3867641668742507 0.8293137031523941 0.6542062549449028 F F F  
0.4492841977579829 0.8238684740754678 0.8479864664642776 F F F  
0.6210175348092335 0.3278333123685400 0.3455677724576418 F F F  
0.5544293015762776 0.6685053471787938 0.8396104731815797 F F F  
0.3858958047312626 0.1575492451421638 0.3475672781807404 F F F  
0.5580929771832999 0.8258601715481504 0.8414295385734647 F F F  
0.3305423265870289 0.4031453596000247 0.2430246498871043 F F F  
0.4456837822665278 0.6671769388219033 0.8415759591242704 F F F  
0.6237377669382127 0.1591276216538091 0.3360497331741854 F F F  
0.5567403658971131 0.1658982995749270 0.1309362064008113 F F F  
0.3824041760849752 0.6740823005147263 0.6468996028515548 F F F  
0.4540598519557548 0.3270994036045067 0.1356324734631897 F F F  
0.6156696957221897 0.8242239935207039 0.6401618873348838 F F F  
0.0036801304666412 0.2474978506315182 0.1870953603530694 F F F  
0.1664771351445964 0.7521714660872476 0.6951208624087855 F F F  
0.3346481071386549 0.7500461452398568 0.8227051409053132 F F F  
0.1658170680427133 0.2483834388140522 0.3216409616544311 F F F

0.1147064034849521 0.1704340500338333 0.1553665346567144 F F F  
0.2737152783361054 0.6767262866696768 0.6617691020628698 F F F  
0.2201882085820159 0.3232228168734963 0.1447247397295541 F F F  
0.0540634242616065 0.82995744227453038 0.6586590821599643 F F F  
0.1118729763312629 0.8303656648185296 0.8578002947686585 F F F  
0.2628335873053373 0.3381997496850744 0.3522623731693244 F F F  
0.2206854441648360 0.6723298707212635 0.8637872371700368 F F F  
0.0560204463757756 0.1677631550813814 0.3543856419986682 F F F  
0.2205138997675462 0.8295423287245214 0.8621393415364693 F F F  
0.0578816273594356 0.3280443828329709 0.3539299893189991 F F F  
0.1118824186686354 0.6705344161748528 0.8592822671719844 F F F  
0.2783664356364284 0.1732300098381145 0.3598403701697777 F F F  
0.2232414845336450 0.1671022393460575 0.1620955667259878 F F F  
0.0579044052516693 0.6703455121941033 0.6531947686475945 F F F  
0.1119194214419394 0.3285667662589233 0.1527261564392504 F F F  
0.2782215213514760 0.8323974594019106 0.6659483514050351 F F F  
0.5077226285799475 0.2347549844509736 0.3110443130980987 T T T  
0.5150227517558653 0.3044682693654969 0.5065391430627970 T T T  
0.4583406093774664 0.3178862900184565 0.5517216332534445 T T T  
0.1688948487132862 0.1406223736862984 0.1333709478485474 F F F  
0.3263425340672441 0.6489998654592810 0.6273855577716603 F F F  
0.1663866116962112 0.3544862668566822 0.1239976955998969 F F F  
0.3319115270685913 0.8587280082714770 0.6349237503741563 F F F  
0.1659080981080194 0.8580792727395448 0.8850034190041427 F F F  
0.0036301514759671 0.3574698390481643 0.3772027867472758 F F F  
0.1663195663720600 0.6427731795587803 0.8855767676204067 F F F  
0.0016991852511339 0.1405289664043252 0.3804467030586167 F F F  
0.1682071389237763 0.0681461383406159 0.0685410843145675 F F F  
0.3197799077954997 0.5811569401828791 0.5553720295482805 F F F  
0.1667763443179453 0.4282984049649485 0.0611843848632034 F F F  
0.0001209309876629 0.9300082908298677 0.5659317403723136 F F F  
0.1663832893047328 0.9307241179644024 0.9496346485676241 F F F  
0.3034150665785376 0.4587519301722551 0.4118634289865355 F F F  
0.1664545342866433 0.5685522214854544 0.9473749822401416 F F F  
0.0009960303131109 0.0676952115179219 0.4456517682433798 F F F  
0.1101154432926208 0.0341040126157210 0.0382595673493853 F F F  
0.2642190509273661 0.5368207155539366 0.5599481834464157 F F F  
0.2241643733322150 0.4664257317906646 0.0382126234403515 F F F  
0.0578716690722345 0.9637353352641753 0.5329812232523992 F F F  
0.1091791061324514 0.9666710897684041 0.9797762850690077 F F F  
0.2568662873802197 0.4749741826792686 0.4909339919636651 F F F  
0.2238988936797952 0.5351211238374418 0.9824951680090734 F F F  
0.0582913993223713 0.0310959437829723 0.4740408482079630 F F F  
0.2244782481225940 0.9648060937781651 0.9797835537455697 F F F  
0.0611899544068066 0.4685412767038670 0.4653178321680898 F F F  
0.1091197902102081 0.5302706133630295 0.9704059552607660 F F F  
0.2716847433919938 0.0346681486044815 0.4863107420373964 F F F  
0.2254081164670083 0.0322555989124140 0.0381957585632904 F F F  
0.0614275209767285 0.5360385683050168 0.5240299469042498 F F F  
0.1092633056604413 0.4617383512228130 0.0263180474300526 F F F  
0.2726884087373449 0.9677837226614372 0.5463732344860688 F F F  
0.5026609415554191 0.1356106251356621 0.1135857469459367 F F F  
0.6701458316253621 0.6376665533107371 0.6234369034150191 F F F  
0.5072508340743127 0.3566582927249868 0.1112767612422516 F F F  
0.6707919608079322 0.8514904876525691 0.6174285865135047 F F F  
0.5037218953351186 0.8529067092387663 0.8690569279081899 F F F  
0.2971599864178955 0.3962387303369894 0.3294118964956070 F F F  
0.5005743978297872 0.6397019250320355 0.8653167986182453 F F F  
0.3302914094224292 0.1379341961665475 0.3799483230166913 F F F  
0.5019241855067946 0.0629968958140452 0.04955869832727962 F F F  
0.6715382225726358 0.5650433160302200 0.5582082028400919 F F F  
0.5060353447260297 0.4299437402498043 0.0477969183893734 F F F  
0.3306311763803791 0.9308027959923137 0.5693457614653781 F F F  
0.5033606507805715 0.9257552362805157 0.9324717737251262 F F F  
0.6744527307897386 0.4276652573539721 0.4383629482059064 F F F  
0.5021159754376612 0.5671439305139856 0.9295156422761224 F F F  
0.3287419014379438 0.0664353520569918 0.4471164760003248 F F F  
0.4444879248744655 0.0266130735047270 0.0221889345533910 F F F  
0.6146991835322453 0.5282009055620236 0.5279893622644352 F F F  
0.5626685501823516 0.4654694635465901 0.0138733781890181 F F F  
0.3876268730064112 0.9629427986632351 0.5305585203059522 F F F  
0.4452773297195449 0.9590101024076887 0.9643338242822423 F F F  
0.6160537672906301 0.4607227520456973 0.4694330634178598 F F F  
0.5607657097298429 0.5329389718327207 0.9557081902864084 F F F  
0.3866564603496201 0.0293969335284814 0.4703103539176752 F F F  
0.5606961821619691 0.9624372150892313 0.9594848184140616 F F F  
0.3589049095628880 0.5033602695048103 0.4074895402810839 F F F  
0.4454598336219249 0.5316316650543627 0.9635890952416233 F F F  
0.6184053331021744 0.0275240614537964 0.4597868504702518 F F F  
0.5600297664197811 0.0300462349229846 0.0171263191493622 F F F  
0.3678870187190668 0.5625056687334080 0.480309728387174 F F F  
0.4473352485418260 0.4642529724755562 0.0220226639505654 F F F  
0.6163728738201826 0.9603564279565546 0.5188207657521247 F F F  
0.8419233317847699 0.1389940880992171 0.1233543268017598 F F F  
0.0038260163099295 0.6417050139735068 0.6267269364170005 F F F  
0.8396411556699022 0.3561275686826590 0.1255079275350397 F F F  
0.9999515790298332 0.857259978934348 0.6311702057703172 F F F  
0.8335360495967876 0.8540928481438712 0.8767147848298649 F F F  
0.6753605265648019 0.3549050950749333 0.3734612888930471 F F F  
0.8364608279745127 0.639141545158320 0.8755646520939422 F F F  
0.6780334291298473 0.1337939940926489 0.3665031931110363 F F F  
0.8401594038297233 0.0657581657386004 0.0592470651831292 F F F



0.0041757665411595 0.5687063851565384 0.5614578834578410 F F F  
0.838853865311368 0.4288580252283936 0.0607230532064236 F F F  
0.6728671804531459 0.9239229743908837 0.5516292452516822 F F F  
0.8351923425739258 0.9273005129773182 0.9410754593693866 F F F  
0.0037913305311505 0.4305584250365229 0.4417103620834979 F F F  
0.8371982648172462 0.5664495334740209 0.9408186498847044 F F F  
0.6770593296264948 0.0610796299874394 0.4313271605778084 F F F  
0.7814371240721059 0.0340134949306119 0.0269162599557191 F F F  
0.9467308633472200 0.5309006887804415 0.5373443796555293 F F F  
0.8959843524638984 0.4632390207246289 0.0263306353154888 F F F  
0.7314858610592267 0.9574358139586465 0.5229962747134493 F F F  
0.7790077594142062 0.9662742718054105 0.9690279243699962 F F F  
0.9465116966849649 0.4633495411920521 0.4787855643266496 F F F  
0.8951260379601109 0.5306027872649253 0.9674959786527282 F F F  
0.7336054735579509 0.0246820758700110 0.4639341209156385 F F F  
0.8938953587477201 0.9590295298871112 0.9734781887207902 F F F  
0.7313719004583490 0.4643633124809057 0.4685664470845765 F F F  
0.7800693152799880 0.5321560903090372 0.9754144140559404 F F F  
0.9432744992706077 0.0339624268028871 0.4786312847470313 F F F  
0.8963367601226224 0.0267623349898543 0.0313628000575648 F F F  
0.7299076925466252 0.5316606447653029 0.5275768037827291 F F F  
0.7809233188127678 0.4647930217649261 0.0342454347650616 F F F  
0.9428227445084900 0.9665923453561192 0.5375574681095472 F F F  
0.0040416435172403 0.2296620532214106 0.1120129379472274 F F F  
0.1682876051021722 0.7284629710356114 0.6235540249665235 F F F  
0.3373501909918559 0.7362083191739686 0.8994163947668170 F F F  
0.1660169712516932 0.2769952000285798 0.3894181338309508 F F F  
0.0654145159094384 0.0612623877128158 0.0616834563640580 F F F  
0.1027654009438734 0.9361786159648773 0.5543506207603670 F F F  
0.2143999954008677 0.4396049152064023 0.4965867561335955 F F F  
0.2688807330337326 0.5639074561325330 0.9655957821524623 F F F  
0.2691294635674808 0.9375250184433312 0.9563797227176494 F F F  
0.1060867450809297 0.4446819510529352 0.4360573718125664 F F F  
0.0640735664129224 0.5550578725441966 0.9434919371155317 F F F  
0.2265141765103209 0.0629770701995582 0.4690045532806906 F F F  
0.2707494127961283 0.0581428269442199 0.0611435741635731 F F F  
0.1066068340241912 0.5643372318820994 0.5411682895063663 F F F  
0.0643143885941342 0.4330807610846534 0.0439488335897593 F F F  
0.2282849279312842 0.9432384179569553 0.5766526278255242 F F F  
0.2270459569114252 0.5512956326671485 0.6189205915060541 F F F  
0.0638295429672837 0.9409230268460931 0.9565213922608464 F F F  
0.2691622922365084 0.4420494831258495 0.0661462888059319 F F F  
0.1034897383355187 0.0563568341954621 0.4488586611938743 F F F  
0.3369758172766524 0.3127310565050010 0.1790671165981195 F F F  
0.4993164426461902 0.7616335449349094 0.6008923896561456 F F F  
0.6664017809613085 0.7684563215704543 0.8843203940039501 F F F  
0.3896437551514494 0.3587992746393293 0.3053883915399804 T T T  
0.3992530127052305 0.0520281427639233 0.0467678542958154 F F F  
0.4328415019978067 0.9349949592539346 0.5484808512310124 F F F  
0.5717004717944505 0.4318564080692298 0.4485472125991024 F F F  
0.6049061535971845 0.5601071559254081 0.9293439385519875 F F F  
0.6058816261883635 0.9372058587876211 0.9342512973356207 F F F  
0.3948705297850097 0.4912247361285509 0.3453241413831236 F F F  
0.3996827693921361 0.5575329926655357 0.9433519697577353 F F F  
0.5741649868863519 0.0551361696546522 0.4349493512316656 F F F  
0.6046450540287864 0.0583249503799266 0.0380331128316129 F F F  
0.4114847741832719 0.5961029002705658 0.4780056987413559 F F F  
0.4031717363975318 0.4374770234649219 0.0491045895837630 F F F  
0.5705000487325265 0.9353551608357833 0.5407325086308887 F F F  
0.5690518851786237 0.5530141923650618 0.5517503044396292 F F F  
0.4006896358559544 0.9308997106860488 0.9427089004091513 F F F  
0.6084290279088336 0.4394753726469744 0.0338455701118292 F F F  
0.4310743721237245 0.0537326860350333 0.4399005316659128 F F F  
0.6815421757907743 0.2775505178549054 0.1076258029554893 F F F  
0.8352908956386500 0.7604976416188194 0.6087982919018700 F F F  
0.9999254665290849 0.7288900148081439 0.8945215421604829 F F F  
0.8405651506432079 0.2271411392939129 0.3901055016219104 F F F  
0.7373771482593980 0.0634737488058903 0.0479828373203830 F F F  
0.7757367735420502 0.9299609537949891 0.5480991262689230 F F F  
0.9014284661164922 0.4350028331821676 0.4610446273184365 F F F  
0.9398845769012283 0.5562645644236426 0.9409961203990562 F F F  
0.9379352039996007 0.9295665087770502 0.9523380911474604 F F F  
0.7769991948521309 0.4393626664052164 0.4450909961598697 F F F  
0.7347100124083070 0.5591685600540401 0.9554854929625378 F F F  
0.8983240724764840 0.0613626283778785 0.4572377442916533 F F F  
0.9423530311263804 0.0501443041516652 0.0560618063414680 F F F  
0.7744143418484555 0.5593499075883201 0.5508718957503262 F F F  
0.7361184647312768 0.4393642499822903 0.0610159387696001 F F F  
0.8975470682020301 0.9415837333579589 0.5628434716598392 F F F  
0.9018256297494389 0.5553019249803270 0.5656747687350574 F F F  
0.7329872988242698 0.9428658607135176 0.9443785465276235 F F F  
0.9413367096360261 0.4363275370480082 0.0465717832354571 F F F  
0.7795235639378717 0.0496024696130561 0.4420934630948850 F F F  
0.4334406712429824 0.2677209239231532 0.5859276190256026 T T T  
0.5096183218996384 0.2577477898084538 0.3873223327228794 T T T  
0.4256350071287258 0.3276898547280935 0.4726054947692730 T T T  
0.4552099795668001 0.3682144816155694 0.6047614052717079 T T T  
0.4230253222370663 0.2401860035066576 0.2528134399559647 F F F  
0.5933524998658299 0.2457295142703160 0.2382732024292764 F F F

Structure H2CO/7 S=5  
1.000000000000000

20.9172000884999996 0.0000000000000000 0.0000000000000000  
0.0000000000000000 17.8076000213999990 0.0000000000000000  
0.0000000000000000 0.0000000000000000 12.2158002853000003  
Al O C H Fe  
10 62 97 64 2  
Direct  
0.0835805238824990 0.2489574326583358 0.2530425875155496  
0.2492842413219340 0.7535148135449501 0.7623238163356502  
0.2456728006418632 0.2516942302417206 0.2531439770768383  
0.0838330063915476 0.7510116677379735 0.7564590685521078  
0.5851805863203731 0.7441889295028217 0.7396123960059174  
0.4164810505396004 0.7480084558640250 0.7454912673339439  
0.7587608269063940 0.2463480785614885 0.2490094808588951  
0.9182509007551138 0.7474626986242700 0.7515456232786774  
0.9211617859910538 0.2486959411045432 0.2520573739533954  
0.7521996278540546 0.7447181872100523 0.7499341327316875  
0.6798245757641236 0.2475864988010383 0.1743771012258024  
0.8354377890628466 0.7458895819030186 0.6851810806474428  
0.0006621439431505 0.7484098989848693 0.8197319866626019  
0.8395070961756199 0.2475572584530712 0.3166238389934650  
0.7876392336061685 0.1680225302883412 0.1475770960393179  
0.9492218524071909 0.6693860631542964 0.6508268451049148  
0.8930407191554722 0.3279273811776490 0.1513227462460695  
0.7247748854036571 0.8220268995028062 0.6454671331841767  
0.7787076429012438 0.8264896964643332 0.8506316019865130  
0.9486449742409541 0.3300252444378645 0.3503975181825786  
0.8908146178922367 0.6672409886824162 0.8495972122907766  
0.7325794946263955 0.1643183097292856 0.3463842152798385  
0.8874610632616938 0.8247885842958274 0.8527670969111045  
0.7278346337459618 0.3247372690324776 0.3508801864194320  
0.7821689991032853 0.6668677455937401 0.8502825456633155  
0.9465750876517479 0.1700896051359868 0.3566219505184614  
0.8960179825447876 0.1667908492121974 0.1488650727241903  
0.7241257071486336 0.6645035908872099 0.6517911538354807  
0.7848593228120629 0.3280061590294329 0.1520297088734321  
0.9454431825591801 0.8280175451474122 0.6539930682846646  
0.3301286034796764 0.2602526287623804 0.1937046748244771  
0.5003459889237110 0.7469259967133971 0.6752233577814815  
0.6680329405921023 0.7450214951884978 0.8107266595581932  
0.4112516431615235 0.3272411621300091 0.3572749185674287  
0.4495966915396143 0.1601402983323731 0.1315991167087151  
0.6155096909597781 0.6657244692590435 0.6436595047293319  
0.5612528602488707 0.3291413190033474 0.1348641418935651  
0.3871727741705059 0.8302434057484750 0.6522118516797241  
0.4496432724977135 0.8213268196221004 0.8462923114840807  
0.6191253997952373 0.3256084639742156 0.3503407100322630  
0.5540425130253519 0.6661858842308080 0.8366610863970351  
0.3848179152003243 0.1607793442576872 0.3444282278622085  
0.5584737241879499 0.8224689851708133 0.8398209610458776  
0.3274403726672641 0.4063644741675039 0.2365764618982786  
0.4452633606543461 0.6654789428464446 0.8381383595940451  
0.6247435226386019 0.1565380692255439 0.3348488683307347  
0.5581862230371203 0.1638597159865663 0.1247059877146615  
0.3821329348446810 0.6744781329816776 0.6442639020055875  
0.4526800033963043 0.3265279832867998 0.1376500976567321  
0.6158942339125607 0.8231178281889369 0.6391719648778015  
0.0022234292779868 0.2472822466381592 0.1871513971553519  
0.1665734938473812 0.7527207343373027 0.6936854032117544  
0.3346399293298868 0.7500770410394000 0.8204211672669747  
0.1642659226518636 0.2494730509672772 0.3201545050286903  
0.1128295360396259 0.1706587332281204 0.1541680719252279  
0.2734745115356690 0.6770601466796250 0.6601769874371647  
0.2164348902210227 0.3232862367147628 0.1408817074557872  
0.0539469744064962 0.8300743166481024 0.6580818437382920  
0.1119858421880431 0.8304234659799651 0.8568264558280654  
0.2605640271298045 0.3410526567478854 0.3474959262900999  
0.2207163862410694 0.6726676613443230 0.8624335691315836  
0.0550777542325697 0.1678577030991429 0.3539459840304045  
0.2206277805902982 0.8300473420219218 0.8608048572682997  
0.0568348546466018 0.3279794436019726 0.3539623021005764  
0.1119207418200841 0.6714886677691754 0.8579301072408243  
0.2772777414283398 0.1750473900363467 0.3602686128243347  
0.2212395761044618 0.1666853543355682 0.1629405738290336  
0.0579732192135128 0.6705820170712178 0.6525778684721149  
0.1084741501570725 0.3298341924149667 0.1516196609882534  
0.2786585910832696 0.8333950212207690 0.6642210264816157  
0.5081137387277421 0.2315774994243975 0.3104987358350547  
0.4966486041588998 0.3125608215440383 0.5261277712491780  
0.4863963767805929 0.3327761900359835 0.6199857333239470  
0.1670784309830249 0.1404023053110868 0.1334998591500807  
0.3259673579165845 0.6492895706042952 0.6254853372076709  
0.1629266774516389 0.3552130048262382 0.1216397473012673  
0.3323230823044895 0.8599585016926311 0.6334334512966497  
0.1659284410166167 0.8582376961055403 0.8842033373606041  
0.0027430068507270 0.3576123967912844 0.3773842559128041  
0.1662364856218950 0.6433859416884838 0.8841963196959741  
0.0008654117846542 0.1407041811575950 0.3805562089458855  
0.1667133320054739 0.0677274493659780 0.0690878076219966  
0.3194526001156726 0.5815187078475019 0.5536117686041504  
0.1639390677236165 0.4289937317055451 0.0591057108180945  
0.9998596712503413 0.9300599704537218 0.5656965428376584  
0.1659846200877627 0.9305339629467542 0.9495943557452344

0.3026449753996928 0.4601879179606271 0.4080223227742500  
0.1656639643813357 0.5692013602800103 0.9457789404582604  
0.0003940924904141 0.0678052735392454 0.4456859872484623  
0.1088989150100864 0.0332419971877087 0.0384262424440951  
0.2646842751057943 0.5359930385791929 0.5597342642395063  
0.2218559584457146 0.4662320219879728 0.0370298024431836  
0.0575484099195557 0.9639661296800009 0.5327840456185188  
0.1085069340729793 0.9658959667281518 0.9797162665047292  
0.2572577237848632 0.4746088314891985 0.4897870343112379  
0.2226197779588504 0.5349814817775087 0.9815618486880502  
0.0577918205551299 0.0313699038246659 0.4739393701865075  
0.2237990714497700 0.9649660387821003 0.9803897110520258  
0.0607921065725244 0.4684495197291763 0.4652264062619647  
0.1078166227902012 0.5317501845899211 0.9679475175380501  
0.2718761623146356 0.0368540265275103 0.4863226136198796  
0.2241888826355287 0.0322907663295418 0.0391073786078998  
0.0612537319264750 0.5359518411365189 0.5239278635794152  
0.1069461185965779 0.4631926793872715 0.0236829544710693  
0.2730567128337906 0.9697964282717206 0.5460693707478137  
0.5044268748227505 0.1335824035936982 0.1044170545853534  
0.6703393285178382 0.6370290233086280 0.6227562850998510  
0.5060255271916528 0.3559844851584522 0.1112984485199799  
0.6710854304120991 0.8504186520917977 0.6171018715841754  
0.5042363473353757 0.8498469817812999 0.8672659960868615  
0.2956191704001178 0.3984384921237503 0.3241413661161557  
0.4999930368970839 0.6379720724423636 0.8624496541109582  
0.3294268097760907 0.1404831705634249 0.3790093652707353  
0.5043143396086613 0.0604194322378933 0.0427938884688959  
0.6713211086663413 0.5643297256363895 0.5581662261038579  
0.5043926748630188 0.4289242816089824 0.0470915783593246  
0.3310219599428977 0.9326712236669121 0.5686711975498927  
0.5045476527258452 0.9225069104863954 0.9298243584315611  
0.6732426642538586 0.4266086372301445 0.4394309977701393  
0.5011868956246114 0.5656597816154616 0.9275403707399201  
0.3287853095537497 0.0689965634532924 0.4467718485634815  
0.4465025186333915 0.0243166175183593 0.0173279182344340  
0.6141424619864660 0.5289305834881581 0.5262732166013978  
0.5612532755304805 0.4642143043299368 0.0133575884606721  
0.3878653495474271 0.9653477514800913 0.5299555822572500  
0.4466432097466869 0.9561299471600601 0.9614466053443423  
0.6151725385038315 0.4613879826927694 0.4680615861582991  
0.5596910368278027 0.5314507525708346 0.9546449719818313  
0.3867320977659791 0.0320165755431849 0.4699154791277813  
0.5623175241417854 0.9587699585606712 0.955217677754230  
0.3572157298949488 0.5061452641010806 0.4021695403390235  
0.4443648987519290 0.5304996163919992 0.9615212808462646  
0.6195233076969284 0.0260896236337947 0.4587421194340291  
0.5622537561099973 0.0269670608043322 0.0111626570720955  
0.3666717666093259 0.5645341745870441 0.4760600484115665  
0.4458541298168318 0.4633050829550855 0.0205744934152739  
0.6171384174659609 0.9591266473938062 0.5180470505575925  
0.8415643963398217 0.1388965431594696 0.1232525571479925  
0.0038770669165704 0.6417942039432474 0.6265653329095136  
0.8390361007992679 0.3564414378033544 0.1262512877321358  
0.9997914918596253 0.8573204333815565 0.6307612319645924  
0.8334135240763428 0.8539408657160068 0.8765527753530838  
0.6736243935147461 0.3533981261058163 0.3752069412962898  
0.8365659731185484 0.6389624914431378 0.8752990605788862  
0.6789983424872839 0.1321189087435673 0.3660056078249946  
0.8399312050053189 0.0656296049970771 0.0590903203358619  
0.0041056928521474 0.5687561604994906 0.5615532605900102  
0.8384880392889442 0.4291102438704730 0.0612091399754807  
0.6734861597248500 0.9228127843862426 0.5516795591201076  
0.8350534036598267 0.9271735409976168 0.9408397425698857  
0.0032570941377346 0.4306567516683120 0.4419238615060190  
0.8371630321546867 0.5664302597480408 0.9407558349241674  
0.6783174671763375 0.0596002743964131 0.4311405737856587  
0.7812382886595399 0.0338370960836836 0.0267525974960603  
0.9465486540085203 0.5311059918947575 0.5377821067460798  
0.8957024578454291 0.4631658337850887 0.0265546047675316  
0.7322670352492890 0.9562522204828945 0.5239403180442187  
0.7788579419685875 0.9661077127988230 0.9688437444334908  
0.9461045832922744 0.4635714453195342 0.4792555312212528  
0.8950045261209594 0.5304258623599181 0.9674475961728368  
0.7347101116784515 0.0234133746828614 0.4647464308843650  
0.8937477797317053 0.9589730000103879 0.9732382639056244  
0.7303684657956222 0.4621475836782474 0.4710326195033496  
0.7799470177147522 0.5324641627968421 0.9756169312945938  
0.9427698017074942 0.0338798657431022 0.4786619746189149  
0.8961289155087425 0.0266977373161761 0.0311783906547888  
0.7294084386227937 0.5297039683924897 0.5294363205200225  
0.7806558494723884 0.4652332344133308 0.0347351652402248  
0.9424734696203630 0.9664729495158698 0.5374584474772477  
0.0023312032693869 0.2274061552058265 0.1131686114366717  
0.1682766137455602 0.7283826167823850 0.6225526747913601  
0.3375023395428947 0.7371236794431905 0.8974396067181860  
0.1642471782270324 0.2790563147415618 0.3870502530388654  
0.0639869668883819 0.0600176331748071 0.0615997485809019  
0.1025111021223283 0.9365149677949141 0.5540745949236567  
0.2154667662528607 0.4382476346667336 0.4967307882727862  
0.2679893698224680 0.5631680327452425 0.9655245072567740  
0.2686469573651266 0.9381017991247803 0.9570921896989655

0.1056094742561468 0.4444824573918508 0.4357658501729526  
0.0632059293414477 0.5572672901124800 0.9404408666194017  
0.2265691558534214 0.0650097097103353 0.4694160318040150  
0.2693218221001196 0.0585163446014107 0.0624362465309874  
0.1065135822772809 0.5641345219601891 0.5408800496430072  
0.0616851692055771 0.4350834047779101 0.0407567916227212  
0.2286815285264733 0.9451646929360357 0.5763744313383948  
0.2281899021636512 0.5492497825278709 0.6205615364043061  
0.0633601095458817 0.9398244734560551 0.9561006646531536  
0.2663384264691508 0.4411115707201496 0.0659293247830033  
0.1029221448268957 0.0568053096826239 0.4487529670247898  
0.3314119182716815 0.3153930195920642 0.1777165049522090  
0.4995741787876552 0.7638502245931940 0.5996882453435312  
0.6659677125678338 0.7680944147489622 0.8827108881374305  
0.3994222669363702 0.3714416298493886 0.3130843845775748  
0.4017238115092275 0.0507161578061854 0.0419844891806906  
0.4332366437248601 0.9376803151680835 0.5476102002145486  
0.5705792881014661 0.4345143985395467 0.4434425443331633  
0.6039438346372532 0.5585919419234735 0.9287213496637461  
0.6070873771021333 0.9327362044966315 0.9296945896151393  
0.3918601706043107 0.4962186007571590 0.3369849353615571  
0.3987557980430326 0.5566242155830337 0.9408880590971277  
0.5755005966734291 0.0535961605761116 0.4325944251988964  
0.6068424043341605 0.0555350204832048 0.0313235662643505  
0.4096815927381764 0.5991033304338407 0.4724378624322543  
0.4015145461825201 0.4369038047177076 0.0476278173678027  
0.5711721273788612 0.9341558973496099 0.5394146500892009  
0.5687190965114203 0.5552445069197142 0.5478503763220913  
0.4019310635078707 0.9279732034415700 0.9408537340985498  
0.6069139956460008 0.4382490375506258 0.0340957096285005  
0.4311076355149820 0.0564890096464856 0.4394716095497480  
0.6819702102603821 0.2790886408895580 0.1093367015136522  
0.8353907145005708 0.7619928944922234 0.6092479103770607  
0.0001702123737732 0.7294102913502963 0.8942466224557049  
0.8396728869008782 0.2241315605990422 0.3884213276528217  
0.7371880034474073 0.0632793492875476 0.0479300943651803  
0.7763307893848647 0.9287539833364826 0.5498810786644200  
0.9009780446236355 0.4352840133634686 0.4616734668966367  
0.9397883211049490 0.5559298807952309 0.9407400007835447  
0.9378341361184049 0.9295922368005420 0.9521228122679323  
0.7757500185869847 0.4360298611225801 0.4488721404590670  
0.7346535296866366 0.5596580991457365 0.9557520666924427  
0.8977903034005478 0.0612123239577667 0.4573218359725426  
0.9421248159284128 0.0501294017994973 0.0559080590788997  
0.7740528367886702 0.5567050427899034 0.5536765900232629  
0.7358517591467095 0.4399749836170365 0.0618361926603240  
0.8972674626266368 0.9412920624758809 0.5627483708817993  
0.9017615247597159 0.5556697235927550 0.5663510655653695  
0.7328364732778168 0.9426632179987720 0.9442842553373793  
0.9409974310913598 0.4361208139572437 0.0467880639547783  
0.7807319150397356 0.0483248864747338 0.4435319951178625  
0.5048199048300648 0.3001247448280214 0.6908641859800270  
0.5104573331428560 0.2385569271008352 0.3896499151572546  
0.4490587368628733 0.3382769811916745 0.4023463004504695  
0.4582746581076039 0.3843539380795924 0.6380942635560879  
0.4198537633464732 0.2368556434726468 0.2391131790661060  
0.5917557388061317 0.2428923431788592 0.2366386645885822

Structure 8 S=4

1.0000000000000000  
20.9172000884999996 0.0000000000000000 0.0000000000000000  
0.0000000000000000 17.8076000213999990 0.0000000000000000  
0.0000000000000000 0.0000000000000000 12.2158002853000003

Al O C H Fe

10 63 97 66 2

Direct

0.0845867967741910 0.2471580298338606 0.2558147959926606  
0.2505506076574556 0.7549184348987619 0.7601424590011143  
0.2477911462690358 0.2517673186970422 0.2537814223558133  
0.0848834139477452 0.7515668477595500 0.7588261480878757  
0.5865590599909014 0.7426771503939653 0.7437542706726610  
0.4176496425895132 0.7481842815065503 0.7432301680474185  
0.7574298365508337 0.2468717265393632 0.2546647142995882  
0.9192581220031291 0.7483134278881719 0.7585132771099408  
0.9206889053030914 0.2456310184000358 0.2548390741240877  
0.7534765880256085 0.7463233377180571 0.7598257467055247  
0.6684694548621855 0.2589220143718474 0.1924554535597417  
0.8368603889004409 0.7477377740268383 0.6941270753566527  
0.0021987931990049 0.7488855600434358 0.8243830109144799  
0.8393286464061595 0.2465502382161462 0.3214346543982993  
0.7811406535625351 0.1660451034077317 0.1589190963302587  
0.9496681922322602 0.6695241570061690 0.6559375242089894  
0.8953474732228088 0.3258411966875505 0.1530730531299231  
0.7259860128477001 0.8251030765855094 0.6571597066448034  
0.7797616867600831 0.8256161205362794 0.8604441156888448  
0.9486554488425050 0.3270999369297704 0.3584966655406217  
0.8925323063714476 0.6675552075687287 0.8570837585155597  
0.7252384520485402 0.1682164885439253 0.3538169648046237  
0.8885796900057562 0.8261444520779582 0.8604460001619982  
0.7368986217871005 0.3310072272149447 0.3504558212349507  
0.7838732275196650 0.6672477346074340 0.8589722353510232  
0.9489422105903518 0.1665093547145808 0.3526184858147601

0.8897547126505216 0.1667226621704262 0.1562359732860047  
0.7275359050964736 0.6694298936929144 0.6599213292837011  
0.7869945213998427 0.3213537175481280 0.1457327084631540  
0.9465049382786440 0.8291005039356358 0.6601929906181441  
0.3362732254660319 0.2603216109201888 0.1952227430200348  
0.5019997574830626 0.7463507753123940 0.6758228184250219  
0.6684354995661905 0.7438103218685771 0.8185881989927316  
0.4300773693372719 0.3295220658207300 0.3648535318198231  
0.4501628155979595 0.1677290102575174 0.1051750330078965  
0.6190296003701263 0.6670564736874934 0.6458717587556521  
0.5527347122542337 0.3245080563681468 0.1242560899146918  
0.3892020399674445 0.8313697437294013 0.6502377337721493  
0.4496692235727053 0.8212425525757910 0.8450456394178065  
0.6734045001837077 0.3969963884697421 0.2354282919231643  
0.5531429552353699 0.6633526169546746 0.8371961496644079  
0.3898898433994178 0.1594580215259290 0.3313886728425141  
0.5585406409603113 0.8197254916178873 0.8445740928068644  
0.3330638887769792 0.4026734497775753 0.2385084202583088  
0.4443385823755556 0.6650856155192448 0.8352893039969819  
0.6211689765325725 0.1414013031081077 0.3168910104543425  
0.5596920213699333 0.1638783271923830 0.1154763865796398  
0.3824198987306462 0.6764929939258231 0.6394154059757030  
0.4451036143770337 0.3276952203099491 0.1451878222172059  
0.6172159307281889 0.8229435323942756 0.6465207806795120  
0.0029311045017357 0.2471984060120826 0.1890839826777646  
0.1674158315437321 0.7536111574752287 0.6940916873139735  
0.3354698398228505 0.7504929081111362 0.8173949081448667  
0.1665057379272324 0.2494332474958964 0.3218990037930803  
0.1168281389118499 0.1704418551474418 0.1567623875199590  
0.2737814079435547 0.6787835779564686 0.6564748889013574  
0.2184596111387769 0.3240293901541133 0.1439779650407489  
0.0549820219759092 0.8301132928617053 0.6611730171657345  
0.1140068346615547 0.8311020148330949 0.8587534335181765  
0.2644521540488773 0.3398778756555899 0.3485607975974804  
0.2224050053136448 0.6725103644639731 0.8612707764241273  
0.0572794072017280 0.1663108716096952 0.3527336151171707  
0.2226704457039183 0.8310940360959299 0.8593776986537042  
0.0572503734463868 0.3271545691174579 0.3581388895191763  
0.1135817220790121 0.6719143722410660 0.8597503949529487  
0.2830766948951159 0.1774350969060826 0.3590020960354138  
0.2253636952990266 0.1677743151604638 0.1633773069606805  
0.0584221922239799 0.6706270162057997 0.6557061796499858  
0.1101655401717158 0.3289647813533934 0.1530597812935547  
0.2806790557723569 0.8358627272795595 0.6612724104425320  
0.5004500022596676 0.2175939678563632 0.2842036197187413  
0.5887252132907839 0.2992284442012421 0.3485637270300749  
0.5134130499772269 0.1783805717606700 0.5104967856442600  
0.4084334732626334 0.3197061618844168 0.4766362294481161  
0.1708769334078874 0.1409467314201449 0.1346357556111968  
0.3262693575712756 0.6516016295432946 0.6206281110000659  
0.1645379099466617 0.3552083407998987 0.1237763144897351  
0.3347137981422446 0.8616214187307092 0.6305403599678248  
0.1681108358245572 0.8591232032068679 0.8844539297293049  
0.0028603992380090 0.3558042067859657 0.3830819811489837  
0.1680409086553658 0.6436300391001976 0.8846729389519616  
0.0030333225178679 0.1382596992066197 0.3785362676182739  
0.1705449763961902 0.0685536167095946 0.0696080326441238  
0.3196266121645177 0.5843427487167924 0.5474515988088866  
0.1654750731772551 0.4290742713648812 0.0611092519165430  
0.0010395714227727 0.9297627084094650 0.5681452334391089  
0.1687744344992316 0.9314707084940609 0.9498372243356247  
0.3042741355058394 0.4616244494018543 0.4043376679031763  
0.1674221290843829 0.5693753945643982 0.9468744724641380  
0.0025022381581024 0.0661114651591068 0.4450251069636099  
0.1124394367857043 0.0347722027428043 0.0387412224373273  
0.2668628029143810 0.5359941365720063 0.5578391392837443  
0.2234592087022962 0.4657678539811256 0.0371988892874729  
0.0589659167955412 0.9628186520232950 0.5345454189666815  
0.1115597999842027 0.9674483249168565 0.9799693081704774  
0.2601516482933689 0.4739972615353683 0.4888647906767671  
0.2243292525581634 0.5344389200981884 0.9813923618131672  
0.0596781825292609 0.0295871039157400 0.4742095242277370  
0.2268691652896129 0.9653351460633419 0.9805394198224069  
0.0607993706883937 0.4672948762928205 0.4707709824236047  
0.1095003666225924 0.5325926969873970 0.9709296010724185  
0.2772508437511740 0.0385956166563732 0.4789149227091409  
0.2277729656800969 0.0326052738604944 0.0394423428990903  
0.0612461199615610 0.5350729885622565 0.5289294634512370  
0.1085258598640488 0.4641251061685001 0.0270414013818091  
0.2772863137576734 0.9719924110585954 0.5397040853754785  
0.5049379201532938 0.1377201322359101 0.0875332174367556  
0.6750744884812439 0.6417884149382442 0.6249355066623354  
0.4993032148532676 0.3549371627778574 0.1102343317300824  
0.6721866677823723 0.8517411179561387 0.6263079391272601  
0.5043575195026585 0.8490037018127077 0.8671654426623776  
0.2992820369019657 0.3975367151157545 0.3243206070256954  
0.4983772987916206 0.6363871806313212 0.8614835674277621  
0.3347770096949239 0.1411542670439200 0.3719675452754324  
0.5052061241686417 0.0640787481689094 0.0281601500461134  
0.6809276980118026 0.5743128950507524 0.5516631618090050  
0.4968064070380957 0.4283748586785530 0.0480776210206186  
0.3346720035177187 0.9342247679792739 0.5644072636100663

0.5048400335569194 0.9234154549727824 0.9248077719923655  
0.6953023862447892 0.4509706728646041 0.4082455439642043  
0.4973396150983015 0.5643802609513522 0.9274157866867123  
0.3347880822864563 0.0699884868878412 0.4402498073059337  
0.4470952545569663 0.0295970385647931 0.0000312847260574  
0.6291972980259233 0.5492278415419609 0.4881444937590655  
0.5547744715352685 0.4629778686079788 0.0183642336382479  
0.3920862150280125 0.9662508814387328 0.5267025707829729  
0.4469701749137476 0.9597269021598795 0.9490965973172111  
0.6368082960608425 0.4894705085215058 0.4155546770966060  
0.5549240819922052 0.5298770028492839 0.9590021201665142  
0.3922924712245880 0.0327192953950021 0.4658094916013114  
0.5628582847809733 0.9583428552553614 0.9520345408977607  
0.3563960984772686 0.5109819239705711 0.3932204687762015  
0.4394764813531104 0.5299813026297602 0.9580286805804770  
0.6177143057681890 0.0239970577749172 0.4639519476531875  
0.5631702851639103 0.0280181170220180 0.0035929573586636  
0.3651187324460226 0.5702875302984491 0.4657940230386912  
0.4390504223675261 0.4630728922902120 0.0179824656329529  
0.6166433886190865 0.9582371064252719 0.5259699989239026  
0.8355126987864978 0.1382003518498204 0.1322488418922843  
0.0041048089189788 0.6418450405753560 0.6306509359456676  
0.8406621308180560 0.3521996657125707 0.1245549424310318  
0.0007022593303775 0.8576544300518938 0.6348132144007478  
0.8342509587309210 0.8541311085850358 0.8852362303324950  
0.7022308659216845 0.3888171997634931 0.3255277556693522  
0.8382565321473372 0.6388320731525912 0.8825487509439633  
0.6747870202117122 0.1282020613575237 0.3634530415240845  
0.8350031531008972 0.0654296668958944 0.0676179193480921  
0.0041360943706086 0.5685425897117873 0.5656215512807625  
0.8400403833828138 0.4257938116166903 0.0614188647498745  
0.6736693075653567 0.9235651750791463 0.5597667154801429  
0.8342343174161435 0.9272477627589836 0.9494223576918869  
0.0032998389451152 0.4295527960569591 0.4467986842005280  
0.8388330228873008 0.5651817702969206 0.9455637327119565  
0.6759056409203652 0.0581249998851080 0.4342012815257916  
0.7772174302101108 0.0316592072458230 0.0350716165506157  
0.9465775784461824 0.5311759021674272 0.5408172157281593  
0.8972279511246682 0.4605621889434715 0.0279363767914067  
0.7318538917009891 0.9580129907246339 0.5308348721839504  
0.7768891460426458 0.9639653438832030 0.9770365899443262  
0.9462179154741653 0.4633472506915026 0.4828437166632634  
0.8966476680475748 0.5286746757243553 0.9710136921960681  
0.7330477088946944 0.0243438749927498 0.4694565468972879  
0.8920008691556267 0.9611246590458172 0.9819268165954218  
0.7460892354142085 0.4737520284959890 0.4754281272023212  
0.7816550577325847 0.5305640648759371 0.9794836794906001  
0.9445841480669680 0.0330885111059435 0.4786310025046228  
0.8923764162206901 0.0288541384977082 0.0398370519759435  
0.7394237693063525 0.5356863653332342 0.5444810596713322  
0.7821650529179534 0.4622949106564454 0.0362946766835822  
0.9438778462817795 0.9663328768530748 0.5390142953095934  
0.0026807384608787 0.2752567436869136 0.1208235780415072  
0.1684888338587830 0.7288278680512816 0.6232308596950394  
0.3382073227326419 0.7350982955567444 0.8934826496818895  
0.1664103572848650 0.2790177493445107 0.3888046945737569  
0.0677770569361684 0.0622465712226785 0.0616702476780413  
0.1037362979873401 0.9352305952636215 0.5565750298034436  
0.2201846033473402 0.4352680881129615 0.4992172587016503  
0.2698165462078227 0.5619809133703332 0.9640207834890049  
0.2715387754689356 0.9380401480352329 0.9572588103931067  
0.1057167818660689 0.4430087692065684 0.4423134329011657  
0.0647942820227895 0.5584970362832273 0.9446680110288479  
0.2323110515346425 0.0670749556686764 0.4605355832688094  
0.2731534147497316 0.0582554041440485 0.0627559453369276  
0.1065766275410432 0.5630027370924268 0.5462524526124459  
0.0629855762335349 0.4370108426870862 0.0453201748309754  
0.2323295098270584 0.9483133939776378 0.5690996379950261  
0.2315562344147616 0.5472385992315905 0.6215287253437453  
0.0662107442659858 0.9418617749467820 0.9563306366181820  
0.2681102309592084 0.4401703722813254 0.0644097137995122  
0.1049996710420061 0.0543650161337346 0.4486358805725447  
0.3384560183996088 0.3170241433365291 0.1864689061368744  
0.5028403425444402 0.7656604087512729 0.6014905903252592  
0.6649770356445520 0.7640112165733862 0.8921995376028381  
0.4054298056919859 0.3695046929205309 0.3284555767116791  
0.4024350380634122 0.0583393544747010 0.0190738704495962  
0.4371334751041825 0.9383952321063239 0.5460867665804665  
0.5973608507071586 0.4714171282695053 0.3634187294229209  
0.5999784577553796 0.5562917384368333 0.935735120343328  
0.6075333576124518 0.9300324976673575 0.9317325235858570  
0.3900175084024867 0.5021652109300886 0.3261783566428067  
0.3945563304621082 0.5562132413759328 0.9336060507539868  
0.5730273918509372 0.0503018999732589 0.4387225316072704  
0.6080010470875350 0.0553099038609093 0.0256499903460450  
0.4064473947137089 0.6073234160672679 0.4586844550952835  
0.3938904008055194 0.4372756422510387 0.0420512956490085  
0.5711551880249526 0.9328761235474865 0.5492502791859820  
0.5833280621960707 0.5780017285596808 0.4953626466708854  
0.4021999926348737 0.9323082126565940 0.9268992321330017  
0.5996064769932590 0.4367417741634895 0.0431666815106243  
0.4375297503481580 0.0568097167447971 0.4387425516097150

0.6676519941010635 0.3183156899345440 0.1925585986676153  
0.8362019408720965 0.7557242140478220 0.6155631836433038  
0.0023150261804139 0.7274434109268794 0.8975117960026057  
0.8385979464479246 0.2746664345565474 0.3896390069904561  
0.7323393308488837 0.0594122345136726 0.0559899786862154  
0.7764128186686069 0.9318764735586439 0.5573656976550025  
0.9009530839356210 0.4356688100196439 0.4644638431884046  
0.9414895880351636 0.5544601357630219 0.9451679157528305  
0.9368760091164385 0.9333939999000852 0.9609697823197824  
0.7912978761090345 0.4433661124661107 0.4715238266153735  
0.7363373087087421 0.5580705210382044 0.9607350161148763  
0.8998269266696011 0.0607518624835959 0.4567333121704606  
0.9375364166988568 0.0543768943809432 0.0646808134995008  
0.779475737364039 0.5549322205480159 0.5942668378242458  
0.7373994432756428 0.4369023468522124 0.0633921709722985  
0.8985210680712007 0.9417922951127248 0.5648585577850851  
0.9016412968135575 0.5561793739500327 0.5678319041761815  
0.7316680536653473 0.9387132981366423 0.9520055631787490  
0.9426045606559167 0.4334711170095646 0.0474276420079903  
0.7785402030474305 0.0502960682517956 0.4474373103984742  
0.4389590716478188 0.2762341217469461 0.5130143660318016  
0.5089670368236663 0.1850093866163426 0.4309074576323234  
0.3580475305516040 0.3022181009642581 0.4791624628992406  
0.4142428392871723 0.3728299705099926 0.5215608508496949  
0.5440299749454460 0.3095577677818246 0.3690742898000711  
0.5576644137142152 0.1921814501470539 0.5248927500079161  
0.4240154532950425 0.2366714385178181 0.2306962282903078  
0.5850312023117912 0.2341003761104694 0.2349697102260612

Structure TS6 S=4

1.0000000000000000  
20.9172000884999996 0.0000000000000000 0.0000000000000000  
0.0000000000000000 17.8076000213999990 0.0000000000000000  
0.0000000000000000 0.0000000000000000 12.2158002853000003

Al O C H Fe

10 63 97 66 2

Selective dynamics

Direct

0.0837398155068243 0.2474012534290821 0.2556737360445922 F F F  
0.2500555182067288 0.7556610355641098 0.7626856810834539 F F F  
0.2471515215040867 0.2485669313814682 0.2521103132648861 F F F  
0.0843311685577603 0.7516141423957095 0.7584610245236476 F F F  
0.5867758521512556 0.7427570177044842 0.7430895370907109 F F F  
0.4177761973127403 0.7489820627060979 0.7449620188787875 F F F  
0.7574033093386987 0.2477378998544566 0.2547079084823736 F F F  
0.9190043696591559 0.7489484710917864 0.7583957920936797 F F F  
0.9203143648047600 0.2460989675169500 0.2549678759735983 F F F  
0.7535055866969032 0.7466632133509279 0.7604457284116890 F F F  
0.6703662779998467 0.2584544425451583 0.1922107956147201 F F F  
0.8367179844132622 0.7482219375455941 0.6943717127966877 F F F  
0.0018332460266690 0.7490407662577994 0.8240502467817166 F F F  
0.8393799920975340 0.2471620579697387 0.3214311120770645 F F F  
0.7812656926480628 0.1658676383635651 0.1600188618128229 F F F  
0.9492071464061311 0.6702389700458653 0.6549584380312723 F F F  
0.8958419958009998 0.3263917474653226 0.1531221648101138 F F F  
0.7258536441374162 0.8257029636000155 0.6586219595446252 F F F  
0.7798093866379290 0.8257232283457796 0.8609850677537807 F F F  
0.9485384496939844 0.3273128686078337 0.3589787396215698 F F F  
0.8926877784350467 0.6680391998993045 0.8573684829599628 F F F  
0.7268217225535309 0.1687321690443397 0.3562249715673573 F F F  
0.8885388055792305 0.8266139502626970 0.8599642137059149 F F F  
0.7373704664896579 0.3316340654993866 0.3506233963976655 F F F  
0.7839821744944118 0.6676018086751370 0.8597412878792454 F F F  
0.9486519587519808 0.1669180232485914 0.3531275912138554 F F F  
0.8898348933201135 0.1670819118913585 0.1563670225139973 F F F  
0.7279419523133299 0.6698947382629612 0.6599325232306370 F F F  
0.7875930448872239 0.3214793845109867 0.1449974749278695 F F F  
0.9464316468977998 0.8297213606517957 0.6603890111717661 F F F  
0.3303506439488970 0.2536445932029423 0.1895445418004087 F F F  
0.5018255467691972 0.7467972162445875 0.6757051559027900 F F F  
0.6685637387999535 0.7436815230680907 0.8185780229434627 F F F  
0.4310124165163787 0.3226232518044624 0.3522711786702955 T T T  
0.4535652064399329 0.1666782727612599 0.1036518400679896 F F F  
0.6194430397009612 0.6678115902321835 0.6449271129471938 F F F  
0.5525011002355029 0.3269432052292629 0.1310530250085407 F F F  
0.3885050285467742 0.8313618893638406 0.6517683366251816 F F F  
0.4501830400565368 0.8219705933495405 0.8452013599235855 F F F  
0.6754834351758205 0.3989140103025051 0.2342178885143937 F F F  
0.5536454964499384 0.6635868046217510 0.8359095463635029 F F F  
0.3860642088482678 0.1577164373997064 0.3331814081669791 F F F  
0.5590499361590915 0.8189161448845894 0.8444852912155412 F F F  
0.3471363798495496 0.3937996988597307 0.2661819928983430 T T T  
0.4448378588428881 0.6661879970853590 0.8363463631978618 F F F  
0.6231119716964670 0.1413137290271038 0.3177452189967980 F F F  
0.5629767737478630 0.1651765757881805 0.1117565213358986 F F F  
0.3819710659452937 0.6772966216654197 0.6422953191606027 F F F  
0.4441885224321638 0.3258138640029671 0.1342638955924897 F F F  
0.6171545577839481 0.8232756257148068 0.6464414544830390 F F F  
0.0023613363970370 0.2476591497548597 0.1894177704722253 F F F  
0.1670126106862497 0.7539578974977701 0.6951798556397435 F F F  
0.3353586485506383 0.7511367255225352 0.8197701020783725 F F F  
0.1660116300635437 0.2492295495180556 0.3203842955885747 F F F

0.1135405022046641 0.1700658797989192 0.1557610208899902 F F F  
0.2732078862083611 0.6801269293737562 0.6594078737810207 F F F  
0.2189234337422974 0.3263748744954995 0.1480222292695430 F F F  
0.0548939770365280 0.8301499111540878 0.6605627768924549 F F F  
0.1130028284399955 0.8305275736267959 0.8587988579606858 F F F  
0.2633531323057952 0.3410593271415436 0.3542371427759150 F F F  
0.2218787223142797 0.6730978843523374 0.8627257891127584 F F F  
0.0569565451550531 0.1672487511197289 0.3539367781565232 F F F  
0.2216879118100721 0.8310893350897643 0.8612347547098267 F F F  
0.0571267927072796 0.3277348253172647 0.3575779370625440 F F F  
0.1130355865167729 0.6718035947434160 0.8596998465828705 F F F  
0.2796274653596882 0.1758728681588195 0.3596599288614399 F F F  
0.2219140719919181 0.1669088405476273 0.1611687648230316 F F F  
0.0579747902315901 0.6707165545679104 0.65568892040793656 F F F  
0.1104013323500368 0.3288536871252106 0.1524138100385031 F F F  
0.2799762880357548 0.8354419974826826 0.6640655756915734 F F F  
0.50615566344028131 0.2092644538495396 0.2881951020231744 T T T  
0.5905450214079835 0.3002324595244943 0.3511081608046069 F F F  
0.4986238012735169 0.1966640184014551 0.4856175802180464 T T T  
0.4207758359854365 0.3105609928669847 0.4608243799008552 T T T  
0.1673990887601704 0.1402925627981446 0.1331626730626496 F F F  
0.3256779880131759 0.6529349676083243 0.6242046609913317 F F F  
0.1646762591087167 0.3562534223417373 0.1255937096239919 F F F  
0.3338195264365424 0.8612354914462159 0.6325337498058587 F F F  
0.1668473168848053 0.8588624531754689 0.8850531687275165 F F F  
0.0027012700898155 0.3561547801840206 0.3830289011166670 F F F  
0.1674917713785504 0.6439913951823613 0.8853449742399064 F F F  
0.0027238533030882 0.1388947398619891 0.3793294910659455 F F F  
0.1672755435127087 0.0680743620232391 0.068405095333918 F F F  
0.3187932270842921 0.5854576115026404 0.5523014156511081 F F F  
0.1654549315936293 0.4300177019708968 0.0627626842789581 F F F  
0.0009789853864604 0.9301717270035894 0.5682000205442250 F F F  
0.1668588483485607 0.9312108586569536 0.9496454400575516 F F F  
0.3047900690210312 0.4609328626176321 0.4148425373165168 F F F  
0.1670270195700922 0.5698659983993792 0.9476894909273881 F F F  
0.0023416094305873 0.0666823771103182 0.4456067308263982 F F F  
0.1094391743533834 0.0339963788735105 0.0371542126684545 F F F  
0.2652620583519933 0.5382386807341319 0.5626884871675557 F F F  
0.2233436107790325 0.4665509751692838 0.0377366558957917 F F F  
0.0588890446539452 0.9634845864017265 0.5351238219582868 F F F  
0.1092347209460200 0.9666177386101751 0.9786716254230328 F F F  
0.2588555064366460 0.4753690848467969 0.4958567286504731 F F F  
0.2240934448365621 0.5350076674710778 0.9814975840383013 F F F  
0.0595626800465823 0.0303502261741500 0.4750312513845074 F F F  
0.2247085096127819 0.9654352865022133 0.9806099975212703 F F F  
0.0606278790505712 0.4669456878465681 0.4726052509195497 F F F  
0.1091821586047814 0.5332396845156708 0.9725724251985426 F F F  
0.2740847940988189 0.0361041330693510 0.4800404697657470 F F F  
0.2249354209482348 0.0327592532811423 0.0391362220851121 F F F  
0.0609509710866689 0.5347673066026246 0.5306156044198858 F F F  
0.1083893703886858 0.4649461513182089 0.0291130003744444 F F F  
0.2749895778439679 0.9695392608163829 0.5408107039912409 F F F  
0.5088248430146436 0.1376486654832192 0.0849908735738367 F F F  
0.6754857976290367 0.6423243970170631 0.6246280817294831 F F F  
0.4988256469985402 0.3551350271908262 0.1085716394830669 F F F  
0.6722034329553424 0.8521992989790661 0.6272025587556769 F F F  
0.5052314839569050 0.8489627464867056 0.8669521108317539 F F F  
0.3027992804964228 0.3942426532670211 0.3418813186287082 F F F  
0.4989713894081547 0.6371693690952327 0.8616764349722672 F F F  
0.3316878339877292 0.1393189486991560 0.3732877145140563 F F F  
0.5085750482569864 0.0640015779249268 0.0261001531512619 F F F  
0.6812888955876417 0.5748027934460822 0.5517857910839084 F F F  
0.4976210422303424 0.4289733597387482 0.0469491779599807 F F F  
0.3329545306568207 0.9333219857783988 0.5661995819662735 F F F  
0.5066203539449461 0.9233215129184416 0.9238663051600895 F F F  
0.6958187614466240 0.4515344517986506 0.408425845448886 F F F  
0.4980834871219031 0.5655514610014976 0.9278469973934662 F F F  
0.3312342239635626 0.0685428101881840 0.4420889983224683 F F F  
0.4500635096470731 0.0305242545301851 0.9977545537534311 F F F  
0.6307227231104022 0.5524666043356063 0.4835359518299285 F F F  
0.5554675798825812 0.4651421173213208 0.0212521393098299 F F F  
0.3900555964838333 0.9663256832301528 0.5291434475999708 F F F  
0.4491262764374824 0.9605951580616576 0.9472553575819944 F F F  
0.6385686795980021 0.4928185491707708 0.4108758664614953 F F F  
0.5556302269781668 0.5322693647775623 0.9623293406372326 F F F  
0.3892566698333084 0.0325618957227718 0.4680259480235307 F F F  
0.5650745698148398 0.9571618120018357 0.9511826606298186 F F F  
0.3574771480834258 0.5096046091026025 0.4032136225165388 F F F  
0.4402292780222865 0.5300039185578242 0.9553457119008826 F F F  
0.6187895277190663 0.0231567754262514 0.4613817772287163 F F F  
0.5661425246665175 0.0269884290481386 0.0022406117351750 F F F  
0.3652468399146898 0.5703313346230914 0.4730114250516451 F F F  
0.4399747128809750 0.4627152442709885 0.0141211435533108 F F F  
0.6172302495564139 0.9574135767970600 0.5233202168379023 F F F  
0.8355674114379639 0.1382646371977145 0.1330068679160377 F F F  
0.0036197538184624 0.6422358075180341 0.6301709624090606 F F F  
0.8411255834029845 0.3525220796153121 0.1241757522387346 F F F  
0.0006226369992817 0.8580085472123926 0.6346675632342240 F F F  
0.834260212002098 0.8544095100207443 0.8854807455508436 F F F  
0.7031252638269194 0.3898478596052968 0.3248519750398771 F F F  
0.8384431774838461 0.6392369489321297 0.8829381118582589 F F F  
0.6765893802999656 0.1285558298618881 0.3651247586558242 F F F



0.8351248283298034 0.0654036890308447 0.0684723394002802 F F F  
0.0036938497973864 0.5689155357648659 0.5652861507610965 F F F  
0.8404690244106803 0.4260690591818417 0.0610240660233785 F F F  
0.6739853282080617 0.9240838268027431 0.5610159276889704 F F F  
0.8342922615153867 0.9273420023732868 0.9499821057870577 F F F  
0.0030991107377076 0.4298738834708971 0.4467458454984694 F F F  
0.8391546910610472 0.5655202761327729 0.9456453664307460 F F F  
0.6771178191634917 0.0585772503972137 0.4358800228494175 F F F  
0.7773159440713684 0.0313028568865192 0.0368318647708534 F F F  
0.9461367297342136 0.5321747934990597 0.5386584299628723 F F F  
0.8976309232244617 0.4607224854679970 0.0272063643102101 F F F  
0.7322789759147312 0.9596681715940178 0.5360908019877044 F F F  
0.7769420541969225 0.9636701120912292 0.9786558773705281 F F F  
0.9458856520497179 0.4643145305401362 0.4807760752906844 F F F  
0.8970061865953411 0.5288994710833066 0.970490092092685 F F F  
0.7338883536471883 0.0260703480557396 0.4749561636801332 F F F  
0.8920849940261348 0.9615270995963883 0.9816090324206144 F F F  
0.7451402689298021 0.4715348361183160 0.4804657479413805 F F F  
0.7820157985315959 0.5309911601507409 0.9798950310493240 F F F  
0.9444383695988066 0.0333647741105239 0.4786164223391083 F F F  
0.8924969927409236 0.0291877298060683 0.0396900453635638 F F F  
0.7385788566702445 0.5335576582266768 0.5493516408685721 F F F  
0.7825554936527439 0.4626397557093256 0.0364566368576007 F F F  
0.9437670507852829 0.9665135792445696 0.5387500842433468 F F F  
0.0017899630337936 0.2735685398917838 0.1194141320535920 F F F  
0.1685918885754774 0.7305075588807384 0.6234245209113851 F F F  
0.3383092663209126 0.7344739965258142 0.8952633978427968 F F F  
0.1660113014542262 0.2748715826462700 0.3905741943943255 F F F  
0.0645960600877160 0.0612318870007229 0.0595944180511339 F F F  
0.1036675528326896 0.9360050378025591 0.5573983017661490 F F F  
0.2184822468977856 0.4371404373127490 0.5054619788928250 F F F  
0.2695149761240216 0.5623850363265461 0.9630991804710618 F F F  
0.2695799160645294 0.9383797433879906 0.9578700506329270 F F F  
0.1056252946822909 0.4420197329912412 0.4457262010234970 F F F  
0.0644096043498621 0.5591489452569220 0.9466505537522210 F F F  
0.2288156161891024 0.0636066996120803 0.4608835737866102 F F F  
0.2699803678072499 0.0589629302415844 0.0630037429878172 F F F  
0.1062679536293842 0.5622484157633281 0.5494815091679612 F F F  
0.0629389464037970 0.4378641644830239 0.0481124680868916 F F F  
0.2304176512985237 0.9445968951354757 0.5696248116621732 F F F  
0.2294461538302741 0.5512168200053438 0.6247548991756631 F F F  
0.0642442852890923 0.9404751764429449 0.9543875670071102 F F F  
0.2681864788983788 0.4407737377607646 0.0636483502351624 F F F  
0.1048729250049334 0.0553265279641693 0.4498198224608032 F F F  
0.3332457645647509 0.3016650579756686 0.1509510355160586 F F F  
0.5024033375480386 0.7668622125741464 0.6017936222312557 F F F  
0.6647578509656213 0.7633961153944639 0.8924058169424569 F F F  
0.3885976652085290 0.3597070987493045 0.3007147525904632 T T T  
0.4057332144707573 0.0600785800510977 0.0163371194579156 F F F  
0.4354088078722640 0.9393455337162067 0.5491156497689715 F F F  
0.6004990703032078 0.4772781729008031 0.3541804186016506 F F F  
0.6006264189334800 0.5598339341368401 0.9417175015633319 F F F  
0.6093507940844916 0.9278466225814768 0.9313463801869588 F F F  
0.3922126562330206 0.4984923311339173 0.3388391276122960 F F F  
0.3953658581479047 0.5556054587024732 0.9291707468449388 F F F  
0.5744599204290992 0.0480200112582736 0.4314916761822829 F F F  
0.6111785586700975 0.0537374745814461 0.0245713712293139 F F F  
0.4066690282437406 0.6072293336216532 0.4662306349747567 F F F  
0.3949197737782555 0.4354715791451440 0.0352394594774879 F F F  
0.5716862213685587 0.9308268095870815 0.5431250494596043 F F F  
0.5858134921126066 0.5835703434424815 0.4867852968688098 F F F  
0.4041332292930164 0.9337680304652380 0.9247485940698752 F F F  
0.6001587681537686 0.4398035090417878 0.0487643163622522 F F F  
0.4339405159307859 0.0575893485860917 0.4400639209485249 F F F  
0.6687988968615528 0.3168045401617690 0.1896542920985880 F F F  
0.8359082793666772 0.7459283628491846 0.6150410970569382 F F F  
0.0018283764819174 0.7277316328755319 0.8972488601413886 F F F  
0.8383587246682822 0.2747433494825628 0.3900771715458973 F F F  
0.7324610001624450 0.0588061994841169 0.0585774919270037 F F F  
0.7765405358409581 0.9343192581626809 0.5655355957944721 F F F  
0.9006103574812840 0.4372019178131481 0.4607426250335536 F F F  
0.9417997042344055 0.5546718428571822 0.9443638496190943 F F F  
0.9369497360608037 0.9340973335530762 0.9597377089827432 F F F  
0.7892716876333736 0.4388754255983685 0.4803785660560536 F F F  
0.7367118546069520 0.5586864328063683 0.9616523057810795 F F F  
0.8996845695341165 0.0608803780874325 0.45632572529650215 F F F  
0.9376829411492551 0.0549455824295322 0.0638394216440190 F F F  
0.7777410393838551 0.5508186689858974 0.6026898824695337 F F F  
0.7378591299370214 0.4372903075841279 0.0639811996715665 F F F  
0.8984380641251661 0.9416376795152530 0.5640396026562868 F F F  
0.9010763476363906 0.5576406856422409 0.5641044955533872 F F F  
0.7317025067934821 0.9381717351645946 0.9542771041298437 F F F  
0.9429765305667246 0.4334344487854622 0.0463200039650005 F F F  
0.7793725672340415 0.0531531717560938 0.4560248750596188 F F F  
0.4551932058042539 0.2538032907122177 0.4868688299365972 T T T  
0.5046933442320057 0.1990030404496523 0.3930858948250852 T T T  
0.3714255602121944 0.2955467661324223 0.4840988444964536 T T T  
0.4434344659542652 0.3533273676192986 0.5138716646395017 T T T  
0.5467494127391603 0.3196036424912876 0.3584284710007495 F F F  
0.5381547975681642 0.2187980401701019 0.5143580941575173 T T T  
0.4249978111471259 0.2323307852184109 0.2257741790406944 T T T  
0.5868671938510857 0.2329223835207632 0.2384135742696094 T T T

```

Structure H2CO/9 S=5
1.000000000000000
20.9172000884999996 0.0000000000000000 0.0000000000000000
0.0000000000000000 17.8076000213999990 0.0000000000000000
0.0000000000000000 0.0000000000000000 12.2158002853000003
Al O C H Fe
10 63 97 66 2
Direct
0.0819516550738392 0.2490718362789189 0.2559494160367432
0.2497706597122417 0.7505205322796292 0.7618773933035038
0.2432049549171711 0.2482578260080367 0.2543580936114751
0.0839523120330164 0.7513281222945434 0.7564251797286942
0.5866805234549433 0.7442145031409541 0.7452820360294049
0.4177024157696169 0.7449301418336792 0.7460621121003347
0.7596504572608589 0.2511220414246692 0.2503096577199870
0.9187854687954012 0.7518273930426872 0.7554967370464220
0.9207651301053673 0.2476658282734492 0.2519385958674919
0.7535280829970378 0.7506930497253731 0.7609511792660129
0.6785455693886623 0.2611812009131658 0.1851040349306867
0.8363937169938030 0.7514095048387953 0.6921286264500071
0.0016276153491646 0.7510205387277840 0.8215911313436580
0.8408051966390508 0.2493221184864501 0.3182295569086375
0.7838034396714653 0.1676577458403442 0.1578663687376107
0.9477215955008887 0.6723113452158077 0.6520981796982267
0.8997375895314164 0.3290143898692621 0.1488196893412412
0.7242481650557900 0.8294313415556837 0.6605330366262646
0.7804555479684838 0.8290880442667120 0.8592141215771412
0.9469046391205871 0.3284951750061745 0.3569319474971295
0.8933056139427812 0.6720521602557408 0.8560583073312126
0.7293232706302002 0.1717148922970221 0.3557706744206172
0.8890933972734955 0.8301938322442347 0.8548789824518808
0.7435694757015094 0.3387304057717386 0.3458463489325925
0.7845401941965379 0.6714984613563091 0.8610640068842405
0.9492837685723368 0.1675764474011955 0.3511510005308955
0.8921972246483710 0.1689443968611355 0.1534521724131599
0.7290503073836264 0.6734820130052649 0.6614092584219295
0.7917582928109441 0.3245811099720647 0.1398705676874467
0.9477106369316834 0.8311369165164354 0.6575637562901221
0.3254995354423499 0.2593055619056578 0.1866929720242436
0.5018084900895258 0.7458684086467654 0.6775551085197662
0.6684408054797378 0.7466240420095122 0.8198306182722959
0.4113385192532113 0.3068901925011420 0.3818159935625832
0.4459529517912033 0.1656924857760097 0.1085818561947505
0.6205323574139161 0.6706990625773760 0.6457365064800129
0.5544926000353267 0.3286783343355781 0.1458368122631432
0.3876187015036420 0.8275036041411011 0.6508104849360035
0.4478462255426383 0.8186825990552806 0.8477036450638277
0.6783165254570952 0.4049204409367983 0.2331739235341004
0.5553322801638020 0.6631813961247954 0.8390402550760072
0.3776562746474242 0.1514131182766986 0.3289424245889390
0.5567680830701025 0.8189421874778071 0.8472059007650682
0.3318049687530441 0.3991601074159540 0.2425480607547267
0.4465473168496580 0.6630885915728914 0.8378270431766143
0.6266704248616708 0.1439121293835326 0.3113748054267490
0.55479688838757814 0.1667319259870674 0.1087957666167673
0.3828656069797460 0.6720955377953012 0.6440590152190555
0.4461893204184932 0.3275211902936642 0.1494028006098833
0.6156070567993465 0.8265514543120940 0.6481987859204101
0.0024464878510515 0.2478994961787978 0.1877318306163959
0.1669867162810048 0.7501646380487706 0.6940662505658439
0.3348743989208940 0.7465011275751950 0.8193311600932991
0.1635239360087203 0.2486217832460984 0.3216981879830814
0.1123151216510404 0.1700550957148250 0.1522850082741607
0.2742147024307827 0.6725512365908373 0.6606306823781495
0.2155100117949855 0.3287078674858709 0.1555187207737014
0.0562241366294131 0.8302506768168658 0.6573726756914807
0.1137540921719750 0.8303245876072939 0.8554819450288468
0.2691794693231788 0.3322018858690917 0.3577273663458331
0.2198052721540928 0.6710121677485306 0.8627936009763990
0.0574759902765197 0.1690292224533316 0.3545424912953666
0.2223734035722715 0.8288291208154098 0.8599011508842268
0.0552794671054194 0.3292256429411589 0.3571067380721074
0.1109267104332076 0.6716818825341551 0.8597320758400883
0.2718579933686265 0.1710367385722958 0.3575826190350018
0.2207897917301111 0.1704697272180098 0.152577385623264
0.0564851225833720 0.6707925326946855 0.6546240992460873
0.1075960666484063 0.3296632806812886 0.1554364724992904
0.2789107854329737 0.8285313415314589 0.6611791073705265
0.5013224235595616 0.2046349430429456 0.3013876161401882
0.5935025213503869 0.2983003764555891 0.3690868625258010
0.5174556437309312 0.2508915603134217 0.5099518705077919
0.4109248798128881 0.2877896479557909 0.4787967642503217
0.1661870680440168 0.1418489661408038 0.1270958738079460
0.3270789775840142 0.6461445766479571 0.6254702854875592
0.1616348066085366 0.3581018883474114 0.1302221126890052
0.3324520772651243 0.8557377795145492 0.6306881516503837
0.1677886944454847 0.8578913621012569 0.8822538917980469
0.0008556820945038 0.3575641274718673 0.3817080712057342
0.1650013497887870 0.6432760976308571 0.8859979276901808
0.0030149224363049 0.1399190217647099 0.3785294040735457
0.1668924747082816 0.0691864413096284 0.0628264739453358

```

0.3217304122841691 0.5778777886533634 0.5533770716616809  
0.1625092126276730 0.4312154289016253 0.0668772070821712  
0.0023983963348872 0.9308768275075965 0.5656205420464728  
0.1675848083835910 0.9310361406688104 0.9457344315237718  
0.3085472084788374 0.4537518760833329 0.4132298281620657  
0.1640145160661889 0.5699444383824883 0.9499925672366771  
0.0030249788615268 0.0676196953079738 0.4441201906656059  
0.1094426035533765 0.0351542610213448 0.0292915531372156  
0.2677485543612988 0.5311162611882008 0.5605711061971155  
0.2204789132110745 0.4668364181057716 0.0398309040663612  
0.0601708274561851 0.9652878036196776 0.5345594369049146  
0.1097975843327724 0.9673495054442738 0.9717084953483932  
0.2618330908043447 0.4684706673747320 0.4928916386635858  
0.2211762759049081 0.5348052699977306 0.9825508596102905  
0.0604350321119086 0.0323142842976889 0.4749740901662414  
0.2250235530526704 0.9651999853916803 0.9789719603740427  
0.0585679679903973 0.4654021751158037 0.4776732250649724  
0.1060768629132204 0.5344175110614261 0.9773703748056228  
0.2679566054213122 0.0279870381270466 0.4771183228455114  
0.2246916832076861 0.0330130545605315 0.0365283380377101  
0.0589505027423508 0.5332545817479082 0.5354540681008682  
0.1053265364929405 0.4665304291907107 0.0348617428097975  
0.2708022126954643 0.9614435037710974 0.5379061930488982  
0.5016950532234405 0.1371582855258072 0.0862951213692557  
0.6767261649842463 0.6458228700599089 0.6256402259889986  
0.5005501719284344 0.3566875963850147 0.1228194606474009  
0.6706379778388377 0.855730833201863 0.6287198189065427  
0.5023234264914048 0.8472604089945005 0.8700791907380259  
0.3014494752603821 0.3901748884498270 0.3355986095035282  
0.5010061599658158 0.6358281123489465 0.8652009006613507  
0.3239612425327947 0.1336621053627612 0.3702476557116929  
0.5012512387895859 0.0626198041893239 0.0292586860547148  
0.6834986054704160 0.5790504956477410 0.5519183176832294  
0.4996956597833521 0.4299002956908667 0.0587339533121834  
0.3297695431613050 0.9278406619786173 0.5642748944571118  
0.5020879140886956 0.9213378625862640 0.9277847520763353  
0.7005868932171179 0.4577393576911341 0.4062044024986969  
0.5005003475263085 0.5651489147221835 0.9343615039678851  
0.3241181190934734 0.0629805945068063 0.4397906004005002  
0.4434863784351785 0.0261224725909264 0.0049415296461181  
0.6369407527368968 0.5628419558426828 0.4727720853714068  
0.5572073325440997 0.4683654984891927 0.0376543013211535  
0.3858815717594704 0.9633149275105698 0.5278266198855919  
0.4438980737618094 0.9560601170935075 0.9545635689316104  
0.6464324122787192 0.5042737622951925 0.3990182993658564  
0.5575167363386871 0.5346741039282283 0.9763438115915580  
0.3830837285609755 0.0293550875267538 0.4664735089514201  
0.5598496052373820 0.9579106229408491 0.9519461503482259  
0.3626334105229893 0.5004501481293677 0.4059917331000220  
0.4429673038660575 0.5272828262401564 0.9570596491487215  
0.6204762440215186 0.0225769033612314 0.4496806294332624  
0.5594558376495504 0.0279954951774810 0.0022678635720509  
0.3697869135686523 0.5609071641756422 0.4772717076104392  
0.4425594991287005 0.4608541588536799 0.0180441807691988  
0.6176781023342340 0.9573286459967637 0.5128700101648173  
0.8377816249174295 0.1402142634039850 0.1302820951567454  
0.0019209294490368 0.6432845079863961 0.6282088273151655  
0.8451462870685609 0.3555930482799414 0.1197167053511974  
0.0020525678657046 0.8586922831180992 0.6318164135803305  
0.8350997894766954 0.8578596661618666 0.8821089581923760  
0.7083337851682799 0.3962918466641848 0.3217370854427122  
0.8392430937472438 0.6431949529736686 0.88264545474047501  
0.6791423473569261 0.1313221387968475 0.3621901846464379  
0.8371925418318933 0.0677531864332338 0.0652147127087728  
0.0016523736663646 0.5700674967368451 0.5634656353527248  
0.8442099037852582 0.4294603485782612 0.0575995918996347  
0.6729923948749011 0.9274465919021160 0.5615514045882489  
0.8356008819691730 0.9304518264804159 0.9464081071566693  
0.0009206118425220 0.4311902025993252 0.4452520800148478  
0.8409279645457407 0.5693186194187208 0.9443163019143541  
0.6784501411512071 0.0613667368195029 0.4338059256840383  
0.7791087090427936 0.0341197798859482 0.0341876459825954  
0.9440087042486829 0.5360934463749645 0.5303729327524859  
0.9008378053056836 0.4643129132833329 0.0218746871546999  
0.7309853595823824 0.9661933870654287 0.5458101728994709  
0.7783529150969616 0.9666867319142288 0.9757447278189840  
0.9436679696382890 0.4682296161534492 0.4725207511505723  
0.8992299862740573 0.5327732289434129 0.9660307322157354  
0.7336508703985234 0.0322215284881202 0.4837598527964257  
0.8936710882564276 0.9642531290887381 0.9771741893493870  
0.7454866580442367 0.4717499653570015 0.4889393440400902  
0.784343377529440 0.5345496310048157 0.9803974573478100  
0.9452546855906555 0.0330859990568522 0.4749070412359920  
0.8944572302088626 0.0316667451853593 0.0356507315237970  
0.7379607921933511 0.5330070758596517 0.5590183706619526  
0.7858691385309533 0.4659261808890566 0.0359590250644989  
0.9449549837137279 0.9660455447245635 0.5345128254943589  
0.0019094625652173 0.2752011500882935 0.1188646956615906  
0.1680989705162957 0.7285342720972294 0.6211100045126442  
0.3382666957318651 0.7454452254868915 0.8985312614396262  
0.1629029231886345 0.2258642018252687 0.3939330885148415  
0.0643686211279004 0.0628025503706633 0.0492713063647930

0.1050718092219051 0.9386232102412265 0.5581135146043525  
0.2204733186938349 0.4313716556139941 0.4993811579302259  
0.2665351219865285 0.5617162224319641 0.9623572149088333  
0.2701421876271606 0.9376970961793800 0.9589613739709578  
0.1034851677722324 0.4378889074612272 0.4563212098410589  
0.0612472937105734 0.5607886870571842 0.9528288253403141  
0.2217590964373552 0.0529544165835670 0.4571433676909560  
0.2696246230836744 0.0586427222700784 0.0622999634149746  
0.1042772487109984 0.5586284405640990 0.5597371559601034  
0.0599574462062321 0.4400804311965981 0.0561406354850941  
0.2269652212464535 0.9343225181204314 0.5658261927641222  
0.2306560556072362 0.5445428063724082 0.6202573309534110  
0.0649658897999731 0.9415225657264066 0.9458847833227545  
0.2653708222664681 0.4410355648793669 0.0652248360674181  
0.1056232116860744 0.0581481105429698 0.4510884704938701  
0.3217936101962832 0.2483520729267608 0.1087429923320566  
0.5021683494163024 0.7690354791962413 0.6055608238585780  
0.6646990524723422 0.7639345374333548 0.8949196548110696  
0.3316657657775050 0.3477939984451039 0.2031775034642899  
0.3985677566317005 0.0534676099583229 0.0262690614137062  
0.4319851174768961 0.9382898660998853 0.5481396414308020  
0.6121412850865708 0.4940003449873925 0.3333828997013071  
0.6024243760968009 0.5637229851147083 0.9598485921875863  
0.6047134600358731 0.9306539303939096 0.9298596032523180  
0.3990771024290414 0.4881356972450299 0.3447844252187884  
0.3984015333423950 0.5505101381720595 0.9252700780670213  
0.5774284758971886 0.0444161457982595 0.4105890663810790  
0.6039280774489930 0.0571062336586531 0.0215780531795710  
0.4122098327780078 0.5964440021111029 0.4737077749740411  
0.3975339186907680 0.4320461891298130 0.0343807412746979  
0.5722330601464380 0.9283056038258349 0.5244930329124030  
0.5942426382273720 0.5979227315069443 0.4681913849381606  
0.3994036799494767 0.9272197461917168 0.9344697268720833  
0.6017013429882612 0.4455961736027754 0.0705334502732898  
0.4269807432447608 0.0558521618529577 0.4375721699627328  
0.6760974528568626 0.3173987155214820 0.1761770919088072  
0.8347521222256902 0.7308686057256897 0.6185394707083096  
0.0009851348859112 0.7280943693743530 0.8937484039466514  
0.8398513743731342 0.2808614463257303 0.3832154151803768  
0.7344812710048296 0.0618689172991576 0.0566663385498540  
0.7742427991780795 0.9435699442409530 0.5833177109176064  
0.8983636080086889 0.4433938688327757 0.4470574996154756  
0.9434917037173371 0.5588555052180716 0.9380029951308660  
0.9383048543270400 0.9366433805471275 0.9544435471080549  
0.7868871202350407 0.4348724391125613 0.4968026473625775  
0.7387840620437205 0.5622684854630601 0.9643167957919179  
0.9003664427813565 0.0597060626592864 0.4511366389620734  
0.9397185860394669 0.0573563233634982 0.0595414367688928  
0.7739599506816262 0.5455664724881313 0.6210319578031012  
0.7416837831879687 0.4401288130967291 0.0649418980887783  
0.8997925735800025 0.9399752737852808 0.5580079803204886  
0.8989241231061249 0.5636285861319261 0.5505361335047947  
0.7330220567236750 0.9412493131273578 0.9517710149722893  
0.9464580104881015 0.4368894763667002 0.0384955796081799  
0.7789599400063395 0.0616876705851341 0.4728212708510597  
0.5392727617823951 0.2247285025399241 0.5689364350197171  
0.5035709310459805 0.2082503259368463 0.3825435004896444  
0.4158486074312792 0.3305703254104247 0.5437882374427013  
0.4008813662655742 0.2293624024870370 0.5039289220335258  
0.6026731096573857 0.3509138361171396 0.3542655609989421  
0.5520085892399142 0.2777114921140498 0.4606896970425740  
0.4234432532359594 0.2308661830093241 0.2327628505897747  
0.5916574660695526 0.2367174223204593 0.2377271406567353

Structure H2CO/3 S=4

1.0000000000000000  
20.9172000884999996 0.0000000000000000 0.0000000000000000  
0.0000000000000000 17.8076000213999990 0.0000000000000000  
0.0000000000000000 0.0000000000000000 12.2158002853000003  
Al O C H Fe  
10 63 97 64 2  
Direct  
0.0848793975429089 0.2481286017515597 0.2536306327020437  
0.2502532062698193 0.7532755183797787 0.7620378869868774  
0.2485882980879247 0.2497372642299885 0.2541435710202556  
0.0845003006388670 0.7503622301032100 0.7567917717069876  
0.5857521537629444 0.7445074872984832 0.7408841174562946  
0.4174401429581803 0.7479661248246894 0.7473284045778120  
0.7574253077849159 0.2458358200992572 0.2495171914559852  
0.9186808227229986 0.7467792954193841 0.7522157465772392  
0.9209219427381247 0.2477601180172295 0.2514674918346911  
0.7525157428601664 0.7443665347175354 0.7494231665738954  
0.6750542657388936 0.2468661633274759 0.1782271950142951  
0.8360037989562124 0.7454117544779914 0.6854939217956089  
0.0012074221975277 0.7477413087846677 0.8200526642823891  
0.8387342567263422 0.2468852046624875 0.3163083550391957  
0.7853871400237630 0.1675311518699684 0.1487707342494843  
0.9496626800846737 0.6686267080496082 0.6513364784847122  
0.8913826423943161 0.3266908659751193 0.1510627345190360  
0.7257400616722933 0.8223625349697337 0.6449910538961486  
0.7790374508516009 0.8259165518120900 0.8506420418519495  
0.9489216209461508 0.3289607597095264 0.3500924234009515

0.8910696001709003 0.6663809919103477 0.8502032182389274  
0.7294992407906314 0.1650771472884218 0.3467755732892346  
0.8877786746943138 0.8245374432107713 0.8535036819213547  
0.7279896882560088 0.3248106569041805 0.3499061720606355  
0.7824399553656883 0.6662444225116301 0.8499744626399640  
0.9470590690021321 0.1691995459673349 0.3549516253511471  
0.8939575392713281 0.1667450579526474 0.1489295092622308  
0.7242219243490754 0.6645318906069432 0.6513199694052088  
0.7829963791105998 0.3261480798629650 0.1505035520156860  
0.9458007939595623 0.8275874812236286 0.6544353279420039  
0.3355956368166570 0.2570090484235149 0.1906637051501770  
0.5009840302232016 0.7464023356466574 0.6772670654387785  
0.6687534203571281 0.7451676353523145 0.8110156562668560  
0.4191895136185868 0.3144185573798812 0.3408735870529939  
0.4510483514397475 0.1584840659145157 0.1414224760649885  
0.6155676721929197 0.6652142448981658 0.6452392289028662  
0.5659916023422740 0.3292924069752385 0.1388330148257723  
0.3878432057821675 0.8300766725693128 0.6545472471225691  
0.4506430329722896 0.8225958816728953 0.8465091710199381  
0.6193033768767656 0.3229465127595725 0.3563075732354276  
0.5550064684100413 0.6676920367134411 0.8405305711151132  
0.3889567218800050 0.1577983916049750 0.3412697381501834  
0.5593519051903477 0.8244804392327657 0.8388342108425033  
0.3330634348392880 0.4025676926586938 0.2415136549622262  
0.4461955425477522 0.6657207755020278 0.8419468048629889  
0.6213763981882444 0.1562331357571031 0.3356531321324413  
0.5600432322280027 0.1647243229350401 0.1255701167591689  
0.3834752684020876 0.6743948855367269 0.6449417155532077  
0.4578207710657365 0.3206471968804783 0.1248016926649804  
0.6168380356648048 0.8227460521370025 0.6395675331945889  
0.0028075408815403 0.2471894979887558 0.1868941610474009  
0.1672260976884109 0.7522002204959155 0.6938704168108348  
0.3354090834177390 0.7495434050108837 0.8215429226436136  
0.1663853572397407 0.2481179305423287 0.3206392069565688  
0.1146665907522151 0.1701538307031244 0.1549401880352392  
0.2747325032462097 0.6770764771836796 0.6593512511501278  
0.2198873551541972 0.3231791887022374 0.1439166132988960  
0.0543219143631286 0.8296007753727628 0.6581985766983949  
0.1124890602487558 0.8298979863795420 0.8571919665991532  
0.2648809019054605 0.3377411695599632 0.3502238138139281  
0.2216688039471232 0.67205408272170781 0.8621405510077871  
0.0556366523487471 0.1674677890490651 0.3536021395852237  
0.2211378612514678 0.8295384443005249 0.8607079087364699  
0.0572925111403801 0.3273034147160472 0.3536144498692035  
0.1128487163608524 0.6704467186232850 0.8583307845802075  
0.2815715385655237 0.1742308404741144 0.3581104071111326  
0.2232104737683503 0.1664399396947886 0.1622336431806096  
0.0584254944350328 0.6697663036497065 0.6529281392790073  
0.1116187754734421 0.3284890284959520 0.1523672071186287  
0.2793391820851711 0.8336155971157850 0.6648906699034793  
0.5147863757892263 0.2354477361564770 0.2985193606967591  
0.4759078922671334 0.4132446304115331 0.5925459946608027  
0.5148924247562844 0.2443571960164350 0.5290547032198540  
0.4463087872658247 0.3571357888674712 0.5669218088138035  
0.1688495430257072 0.1401224528579425 0.1333489425169328  
0.3273789711041785 0.6492006115278746 0.6252325974610565  
0.1661025336697752 0.3544898752948084 0.1235724599687991  
0.3332906256429163 0.8599349734893552 0.6347099038143009  
0.1665177720622109 0.8577561708206947 0.8841932993141767  
0.0030441846454613 0.3566911659928217 0.3770387313872339  
0.1673144631446981 0.6426518085134727 0.8844501959659099  
0.0013472873575009 0.1400909489292256 0.3796044985510858  
0.1682530957077873 0.067545970551237 0.0686587103220544  
0.3210917582357094 0.5812276694285392 0.5534184104700308  
0.1667404532337174 0.4284023622189453 0.0609893904001731  
0.0001694119491747 0.9296625325549080 0.5657401213458653  
0.1668097168158803 0.93022668989460413 0.9493285196113562  
0.3054764696617971 0.4582372472846452 0.4102727212658293  
0.1672095511068307 0.5685414108692066 0.9466832161984330  
0.0008053432841065 0.0673103217561597 0.4450418195937794  
0.1102606506499309 0.0327795231648701 0.0395996439443441  
0.2658554662479290 0.5363020384152036 0.5583164746810403  
0.2243558083209470 0.4659081025604853 0.0373881298125878  
0.0578702436511254 0.9639852983387505 0.5337573402564713  
0.1095168074698099 0.9653955621649611 0.9809501760240483  
0.2588792240708256 0.4742378438972081 0.4895229861026684  
0.2244812825289589 0.5345132257184180 0.9814123989623944  
0.0581704817733473 0.0313016625211727 0.4746486468261658  
0.2247995605216270 0.9649889364332613 0.9783898900004823  
0.0610136904685574 0.4673078639287167 0.4657404265434397  
0.1096527761803171 0.5309533275896063 0.9705830847340128  
0.2747762251884152 0.0357297079390266 0.4824963375528961  
0.2255360321280444 0.0323613677358151 0.0370056082944342  
0.0615375130353126 0.5347828338019721 0.5245663720283557  
0.1094086729774666 0.4625017763974473 0.0267131116056542  
0.2750831308509553 0.9689010660883209 0.5428131631447226  
0.5058247475977287 0.1341413801476035 0.1090327451544380  
0.6703269012535942 0.6366315118036205 0.6233317118192300  
0.5105438542166120 0.3536467446154906 0.1076898728564372  
0.6717538075077523 0.8503781570980452 0.6170765556580161  
0.5051070124319523 0.8515966354576631 0.8667468911724580  
0.2996687268638105 0.3955468828073878 0.3279193140482663

0.5011914901159322 0.6384808696558061 0.8655683402785380  
0.3335847192443950 0.1390963134988375 0.3771763449743293  
0.5052259640150680 0.0617604719486561 0.0449408165376471  
0.6713272022614097 0.5637481827190604 0.5589769765433888  
0.5088657982411475 0.4272356364242927 0.0451892722071671  
0.3327583367604320 0.9324631542477052 0.5694208806685048  
0.5053550187442724 0.9245555362658721 0.9293287716666701  
0.6733507724642583 0.4257579538461835 0.4409674313056332  
0.5033749434036259 0.5653858373108713 0.9289948932600041  
0.3322805406552972 0.0682939904339378 0.4463648078414103  
0.4474824179003255 0.0246930397074553 0.0217159009350489  
0.6144420967310804 0.5247848443531853 0.5356385957379585  
0.5651161393325030 0.4642800594440440 0.0126202570515882  
0.3902067094010794 0.9656405239888122 0.5342747205800257  
0.4476397659266148 0.9569426806880391 0.9645109019643083  
0.6154522684934920 0.4571106953925665 0.4776593263067208  
0.56238154356113967 0.5321145049163604 0.9554272883121012  
0.3899741689122456 0.0321471921536452 0.4737854529876391  
0.5629647787647435 0.9619089278523837 0.9522193125836249  
0.3605299184617238 0.5035116276959625 0.4056312834394832  
0.4471844671818311 0.5284214095972518 0.9618270202253462  
0.6176444574682289 0.0270805565057608 0.4633366678704616  
0.5629927740926527 0.0297079012428984 0.0092292118866102  
0.3691956142907898 0.5628323330112567 0.4782402231381782  
0.4497820459468049 0.4605222317275829 0.0189338604542202  
0.6163773800108991 0.9598817768005754 0.5222725544723295  
0.8394980748650294 0.1387312642768836 0.1237504698830751  
0.0043004565373174 0.6409992273071283 0.6269973748582055  
0.8373187588083471 0.3548891817681753 0.1253762016276218  
0.0001392935001868 0.8568636199979871 0.6310274504110329  
0.8335733374617016 0.8535613636695483 0.8767959941189775  
0.6739195573834362 0.3524587161525320 0.3774032775534111  
0.8366731945234416 0.6381436619258032 0.8753088528453431  
0.6762179800703445 0.1325240917156962 0.3664738371041871  
0.8381694343568012 0.0655765135347852 0.0593084584479570  
0.0044255636959815 0.5678787156955178 0.5618723876443994  
0.8369971741901070 0.4276526328520192 0.0605133955516303  
0.6732946999179477 0.92229627671543720 0.5516472978515330  
0.8346005905597070 0.9270015008836361 0.9409220554648531  
0.0034492874430147 0.4297317689154772 0.4418020104302389  
0.8367994164785817 0.5653401469518258 0.9404952230638617  
0.6759510182679482 0.0600441107887796 0.4315846577821373  
0.7797839518558610 0.0331475504619398 0.0266416943931461  
0.9468337354843965 0.5303995986890938 0.5376177362597256  
0.8944733900451255 0.4614978442961564 0.0265883239641926  
0.7315510631432018 0.9560450116074045 0.5199881744235517  
0.7780617247217849 0.9653843801239806 0.9686694212227245  
0.9463199320965582 0.4628958503181088 0.4789026729457073  
0.8943487825357346 0.5288752300257540 0.9677372586901242  
0.7329369343333318 0.0233177755416807 0.4609787588992890  
0.8929593583549236 0.9595037561928728 0.9735228189043278  
0.7303641378707202 0.4646449312380530 0.4644072539118989  
0.7793116046582205 0.5315814342179126 0.9745812296549136  
0.9431356545967902 0.0330372153298188 0.4771466840655992  
0.8947049276678640 0.0272635152501317 0.0314451428587343  
0.7293176768420205 0.5323075858870915 0.5224385538075760  
0.7794489253908450 0.4642109999764330 0.0334625324326872  
0.9428132596987399 0.9657230114063745 0.5362574297474666  
0.0032960535765517 0.2326613775804051 0.1103209979122095  
0.1688957927265031 0.7284612045361057 0.6223010182449740  
0.3376286584084421 0.7300951127662473 0.8957078897703360  
0.1666210404947427 0.2759011980304012 0.3891507465607442  
0.0655017860008614 0.0593689163647131 0.0640939493495835  
0.1028428359730451 0.9369709664361243 0.5560820796997646  
0.2166101032296208 0.4385548388641859 0.4955143346268343  
0.2696755583592199 0.5627032538214017 0.9640241854216665  
0.2695257683309706 0.9383326340216607 0.9538867835559978  
0.1058590158909267 0.4431767815582958 0.4366842619052289  
0.0647059948428129 0.5562160462534385 0.9441747772456123  
0.2296729229324190 0.0632737648687756 0.4622883353490291  
0.2708026069008571 0.0588152675680431 0.0589553619207487  
0.1068598346104707 0.5627102010083065 0.5419126757369578  
0.0642806473050251 0.4344163338585444 0.0449639802856117  
0.2302083152078001 0.9438972897578329 0.5701503041249411  
0.2286662050370896 0.5504531583845947 0.6174599873049678  
0.0642192032942960 0.9391109800160745 0.9587198145181862  
0.2692489221344997 0.4410958523471092 0.0649865967549283  
0.1033804822827512 0.0569793238423720 0.4503752025723360  
0.3362226228885890 0.3119722134631415 0.1741424063837946  
0.4997632550996459 0.7457147779588498 0.5978627730281452  
0.6671043070728778 0.7672067453669708 0.8836999928690603  
0.3946743301324988 0.3559196928257611 0.3048197707324951  
0.4026960698865689 0.0496337848556141 0.0493430430443728  
0.4352986450056274 0.9383691888359911 0.5551495963581794  
0.5706495159135494 0.4279540843473971 0.4613744520866112  
0.6062021239919408 0.5603495073208443 0.9300086184934628  
0.6076844851008972 0.9370552081380870 0.9241456056018045  
0.3966372060222156 0.4915203344716540 0.3437127569580914  
0.4010974646415113 0.5535426831191100 0.9415539778074096  
0.5731141105443668 0.0551974314643582 0.4413960919650188  
0.6077145752622811 0.0587168222032664 0.0272038493334940  
0.4127630354421106 0.5964549327643570 0.4759033223468823

0.4058367569737079 0.4326727999315031 0.0445510602633869  
0.5708468396698188 0.935187312221391 0.5467869529157190  
0.5689602477169720 0.5474438063519400 0.5642631782564166  
0.4029491681383299 0.9280070829421952 0.9460755508501247  
0.6112985857587419 0.4392593593252865 0.0324900581648550  
0.4349016679255708 0.0571348352630715 0.4468514083075315  
0.6740248629689041 0.2836192886737101 0.1189712157327729  
0.8361394274904684 0.7622674548167381 0.6098992048103115  
0.0007517675158179 0.7295162635735585 0.8949761775916829  
0.8390471747938166 0.2295855935143633 0.3916640555245903  
0.7354145804196065 0.0620062045007537 0.0475874426699025  
0.7761231387729987 0.9281976965505140 0.5424498759004944  
0.9010903965916519 0.4348809508301139 0.4610726362569617  
0.9394057878892690 0.5540596706292507 0.9417497140316163  
0.9373130892138556 0.9306369076948655 0.9525860796377184  
0.7756675970245404 0.4411572438182421 0.4362382163018692  
0.7342131871223389 0.5590497286808920 0.9542573095151807  
0.8981239151161119 0.0599913893202655 0.4549255205431381  
0.9404917727251945 0.0511991045283810 0.0562788552219939  
0.7738274639939755 0.5618589777510571 0.5402151786517410  
0.7343526982379165 0.4393256531243520 0.0598728349544598  
0.8975333205137725 0.9403773403671961 0.5608125883087731  
0.9020120688920926 0.5549982192788044 0.5659810903759934  
0.7322632112168703 0.9414415976392410 0.9439094964254389  
0.9395665619028035 0.4341694942201209 0.0473143340302614  
0.7785141545930548 0.0479321365921468 0.4365123056805295  
0.4342154785622067 0.3435035986431808 0.4786684393716552  
0.4267197500785291 0.3178161450866748 0.6294129115028070  
0.5574639251509711 0.2622070039548902 0.5479296817723872  
0.5155792444163828 0.2421448281835858 0.4480893928055801  
0.4247824838140168 0.2388850442214409 0.2431599945238868  
0.5895524742874498 0.2430944752332682 0.2414217437860677

Structure TS10 S=4

1.0000000000000000  
20.9172000884999996 0.0000000000000000 0.0000000000000000  
0.0000000000000000 17.8076000213999990 0.0000000000000000  
0.0000000000000000 0.0000000000000000 12.2158002853000003

Al O C H Fe  
10 63 97 64 2

Selective dynamics  
Direct

0.0845246690826258 0.2481262314323516 0.2536131706230194 F F F  
0.2502425205976166 0.7533389541836115 0.7623800949272095 F F F  
0.2479427744799665 0.2503405341010705 0.2537562922362468 F F F  
0.0845356580518626 0.7505361810368285 0.7567554383662269 F F F  
0.5859456045355103 0.7438777125515017 0.7409862345691280 F F F  
0.4175493348958241 0.7477022840462553 0.7475296498550179 F F F  
0.7573439767390084 0.2458200650794424 0.2492572221854132 F F F  
0.9188004151849682 0.7467721466121660 0.7523186062678846 F F F  
0.9207559353717869 0.2476682972509110 0.2518314088190152 F F F  
0.7527486290360983 0.7442338451480595 0.7497825960918831 F F F  
0.6753198599889885 0.2467129498940537 0.1786179405571602 F F F  
0.8361324050190717 0.7453175909535545 0.6856517412575371 F F F  
0.0013023666775851 0.7478619255377623 0.8201280888034503 F F F  
0.8386083377053097 0.2467876130126569 0.3163674668156631 F F F  
0.7854293253834683 0.1672962152682089 0.1488393398492391 F F F  
0.9498030512886899 0.6686862488453542 0.6514335926735626 F F F  
0.8915774404742862 0.3266144344924413 0.1512234221403972 F F F  
0.7258560361648421 0.8220591190032351 0.6454296089048555 F F F  
0.7792062843347267 0.8256893227971673 0.8510423381000010 F F F  
0.9487198945916830 0.3289537638955764 0.3506185241321234 F F F  
0.8912925746685403 0.6663546709726944 0.8503716706998645 F F F  
0.7296835727402424 0.1649854577022367 0.3471590066111574 F F F  
0.8879590519772407 0.8244867229206676 0.8535998443651849 F F F  
0.7283909706259450 0.3250157605259147 0.3497015947078879 F F F  
0.7826602765390476 0.6660450314145052 0.8500222323938900 F F F  
0.9468623804494101 0.1691625248991002 0.3553731982078858 F F F  
0.8939932479410899 0.1666143216692149 0.1491391706144327 F F F  
0.7244726392720793 0.6643567450789476 0.6515453235297599 F F F  
0.7832078140183967 0.3260666769492957 0.1502417214856706 F F F  
0.9458640959623850 0.8275215736134314 0.6544942299313092 F F F  
0.3335652260813333 0.2586837908878721 0.1919207845856050 F F F  
0.5011061882511783 0.7461147578197114 0.6773580742654488 F F F  
0.6689111068374984 0.7446023336093930 0.8112567804647242 F F F  
0.4186913329226059 0.3149475884598729 0.3489671987116409 T T T  
0.4523354909764237 0.1591166769100525 0.1379456087522115 F F F  
0.6158191738971652 0.6649354518827195 0.6451351824764160 F F F  
0.5654311949242370 0.3292384980271095 0.1410796737753941 F F F  
0.3880115550915590 0.8300895099898256 0.6549825215775655 F F F  
0.4509563716496388 0.8217786028882088 0.8472561034984452 F F F  
0.6197787115604285 0.3219658652584414 0.3589080154835642 F F F  
0.5550240842307304 0.6665422580322229 0.8399032914265803 F F F  
0.3882050256346687 0.1578770552192168 0.3411357935986885 F F F  
0.5596609619001782 0.8231958641662231 0.8395620293014474 F F F  
0.3322837693417569 0.4030771231698154 0.2407512592394028 F F F  
0.4461855144104447 0.6649537134460743 0.8414658955673247 F F F  
0.6215660129127869 0.1554424994083234 0.3360929722015769 F F F  
0.5612828549385540 0.1641178835635202 0.1253011624985803 F F F  
0.3833321944840904 0.6745591460747349 0.6446771292519458 F F F  
0.4568631128892022 0.3229359604512609 0.1322718011656505 F F F  
0.6169648882587566 0.8223642985410535 0.6398461965551121 F F F

0.0025173888601486 0.2470137915519999 0.1872533410028723 F F F  
0.1672642282322556 0.7523642879494332 0.6939401990104415 F F F  
0.3355037605130065 0.7493422949727062 0.8217299837357572 F F F  
0.1659495949295362 0.2484313084452481 0.3205930979224547 F F F  
0.1142901231617302 0.1701224006529785 0.1550046778396705 F F F  
0.2746127629565649 0.6771946432309051 0.6595191063197987 F F F  
0.2187819086471734 0.3236302291238502 0.1436981759878933 F F F  
0.0543690599702416 0.8296165167861531 0.6581920814444544 F F F  
0.1125314908209134 0.8301191072236165 0.8570844814665151 F F F  
0.2640303516600824 0.3386244447862552 0.3499877074947833 F F F  
0.2216264907109604 0.6720673024316923 0.8622103062177899 F F F  
0.0554260683362600 0.1674544625699070 0.3537758556467381 F F F  
0.2211888294578159 0.8295874257564009 0.8610897400090138 F F F  
0.0570713463134354 0.3272176545656720 0.3539358449545418 F F F  
0.1127978464828132 0.6708440570859082 0.8583849059801167 F F F  
0.2808047015863977 0.1738985407044638 0.3584273243667866 F F F  
0.2228297628799680 0.1667436905418498 0.1620914888260359 F F F  
0.0585475543384817 0.6698470153698750 0.6529320315562330 F F F  
0.1105485624388649 0.3287344410738626 0.1520885438597830 F F F  
0.2794972962223241 0.8335667801282796 0.6653356988713384 F F F  
0.5156254256403443 0.2345229365430939 0.2998761658746147 T T T  
0.4729523190428253 0.4091829067414707 0.5786718615827553 T T T  
0.5188176437610323 0.2531163857700918 0.5242809796889176 T T T  
0.4468837314238954 0.3516341170224422 0.5514836142769539 T T T  
0.1685338808681749 0.1402457607066623 0.1333624541784317 F F F  
0.3272130756485865 0.6494746674017122 0.6250261325488751 F F F  
0.1650216638936115 0.3548248595069268 0.1233487464014331 F F F  
0.3334387793044442 0.8598686419070063 0.6351157268962879 F F F  
0.1665489356044105 0.8578949403885971 0.8843346487033585 F F F  
0.0028613841833760 0.3566584210601818 0.3774237667053413 F F F  
0.1671874548548686 0.6428452960013544 0.8844591773885426 F F F  
0.0011711483809833 0.1400665199863269 0.3798985511384672 F F F  
0.1680636619827212 0.0676584453257831 0.0687264166722130 F F F  
0.3208311278467164 0.5817142968515085 0.5528375087769390 F F F  
0.165785552732030 0.4286859515713175 0.0607541735177222 F F F  
0.0001517470315093 0.9295990975698345 0.5657553471872347 F F F  
0.1668081174513816 0.9303468791515357 0.9494533489918595 F F F  
0.3051502261142645 0.4588927638329139 0.4095814634991797 F F F  
0.1668278630409077 0.5687475417296994 0.9465493497717645 F F F  
0.0006809721086753 0.0672525273620863 0.4452424728802029 F F F  
0.1101187230887177 0.0328193794949740 0.0396323819351210 F F F  
0.2662844867807337 0.5357595663234349 0.5594867597068287 F F F  
0.2235712946572974 0.4658405676427222 0.0371717198717008 F F F  
0.0578286825245655 0.9639410706833900 0.5337566575705708 F F F  
0.1094652111096863 0.9654430348113365 0.9809830484706623 F F F  
0.2593513814931327 0.4737349349216728 0.4906347236077906 F F F  
0.2239792958638702 0.5344424934654270 0.9812407290850800 F F F  
0.0580815281882820 0.0312763201368753 0.4747242114129477 F F F  
0.2247637523581432 0.9651688071597562 0.9785750075715356 F F F  
0.0609912408540936 0.4672511237032353 0.4659642831241158 F F F  
0.109109360563813 0.5314643416385678 0.9703212176178084 F F F  
0.2744195710534427 0.0352765383563565 0.4826184398400457 F F F  
0.2254121012457944 0.0325613463675651 0.0371602622264220 F F F  
0.0615857176633341 0.5347705538095866 0.5246665842992115 F F F  
0.1085853548366842 0.4630176430061042 0.0264338398943380 F F F  
0.2749505148575935 0.9685367810632144 0.5431078138712664 F F F  
0.5069367029242926 0.1337857231826263 0.1075822274791420 F F F  
0.6706545314906691 0.6364320837523536 0.6234619900542739 F F F  
0.5099561902345826 0.3544719426076242 0.1122328004299575 F F F  
0.6718831156675904 0.8500395727780798 0.6174385789464125 F F F  
0.5055219119550571 0.8505983956306196 0.8674870794738894 F F F  
0.2990983761181170 0.3961650580779974 0.3272133770991701 F F F  
0.5011477550126315 0.6376342079877446 0.8652532401350612 F F F  
0.3328187393663384 0.1388416671352601 0.3771874828292638 F F F  
0.5065380566637074 0.0610474355336876 0.0444751667431191 F F F  
0.6717043278450703 0.5635607207595754 0.5592013230715267 F F F  
0.5083754061395283 0.4276515989008871 0.0485016268826399 F F F  
0.3327516665948451 0.9323446308175818 0.5696846068646977 F F F  
0.5060902379643508 0.9234793772025682 0.9299484701322172 F F F  
0.6738157506468312 0.4255683427902852 0.4414134782863499 F F F  
0.5031469178816081 0.5648485112337625 0.9295801805501611 F F F  
0.3318015588393735 0.0680217410300088 0.4462914294185367 F F F  
0.4486716290121677 0.0241135082837260 0.0217206310777129 F F F  
0.6147408045156553 0.5252225914941704 0.5343859531314195 F F F  
0.5646782087057005 0.4642307576443585 0.0151143457253013 F F F  
0.3900848338605201 0.9656704118530754 0.5343538138362263 F F F  
0.4484953758857699 0.9561727720969913 0.9650620540814572 F F F  
0.6158238510548344 0.4575768932964479 0.4764212028385728 F F F  
0.5620856920092336 0.5315693076269028 0.9566213870440947 F F F  
0.3896187805384699 0.0321006436870235 0.4736767026616988 F F F  
0.5638643121449576 0.9606801307009789 0.9523032763575543 F F F  
0.3593907008205619 0.5053706280251262 0.4029414473533279 F F F  
0.4468883898584792 0.5282672485112840 0.9630627787690926 F F F  
0.6180052984022879 0.0267109163868611 0.4636340398345311 F F F  
0.5641522856948669 0.0286519920292321 0.0088724161045590 F F F  
0.3681535338836923 0.5646323484012896 0.4756014990441386 F F F  
0.4493709342401004 0.4609081258148251 0.0215932063452868 F F F  
0.6166411473732580 0.9595092776525078 0.5225151616202552 F F F  
0.8395650981890697 0.1385319241407146 0.1239664631087223 F F F  
0.0044235054231621 0.6410746162999246 0.6270010518830986 F F F  
0.8375418089744571 0.3547899583034777 0.1253270550867569 F F F  
0.0001707725344957 0.8568366026485279 0.6310272873548115 F F F



0.8337538771151856 0.8534094671540373 0.8770924668159736 F F F  
0.6743221532392170 0.3520932607990588 0.3782167652783102 F F F  
0.8369204897471292 0.6380368213467804 0.8754216890237743 F F F  
0.6765470325418619 0.1321270150815721 0.3667789979936202 F F F  
0.8383092533924383 0.0653342953779941 0.0596158989454381 F F F  
0.0045054397054471 0.5679843328134453 0.5618480462728002 F F F  
0.8372938808177750 0.4275401697275356 0.0604165147846203 F F F  
0.6735080056949698 0.9225935984205194 0.5520478097456376 F F F  
0.8347886336650063 0.9267709477693344 0.9412895632609590 F F F  
0.0033759008745164 0.4297722249706837 0.4420392569037332 F F F  
0.8370927702585362 0.5652669899972054 0.9405812070479271 F F F  
0.6763525388699421 0.0596527826047719 0.4319862239197647 F F F  
0.7799309453223060 0.0327606705335910 0.0272549049971289 F F F  
0.9468602200308069 0.5306364601936124 0.5375425819547885 F F F  
0.8947830505700054 0.4614042536364025 0.0265600251371367 F F F  
0.7318105534437720 0.9556438086656414 0.5205983487524506 F F F  
0.7782231041582222 0.9649927369448577 0.9693125519423802 F F F  
0.9462819103916758 0.4630907144582608 0.4789592998977668 F F F  
0.8946483135952477 0.5288097643747207 0.9677716215342187 F F F  
0.7332897943952119 0.0229066095847728 0.4615423214716472 F F F  
0.8931508859036867 0.9593950982733546 0.9736047942245563 F F F  
0.7308655635580195 0.4639007124695667 0.4661582303667515 F F F  
0.7796036903658674 0.5314902534997188 0.9745934645524486 F F F  
0.9430358949312279 0.0329292845936493 0.4773299587441002 F F F  
0.8948820482599729 0.0271527290826370 0.0315403726755434 F F F  
0.7297748172300516 0.5316038681473856 0.5240870029492513 F F F  
0.7797446942056467 0.4640830915701954 0.0333583299361422 F F F  
0.9427572229838503 0.9655987342295944 0.5363708349771130 F F F  
0.0029359653419760 0.2335349376122906 0.1102828484115363 F F F  
0.1690166390412244 0.7282436974220374 0.6226483621979781 F F F  
0.3376644158937125 0.7302750994610108 0.8961120649207075 F F F  
0.1662250134647110 0.2770923894183071 0.3883377973307418 F F F  
0.0653264505520426 0.0593460467031406 0.0640828460852774 F F F  
0.1028117103324178 0.9369135181666408 0.5560098155879771 F F F  
0.2177271489789590 0.4371322561513793 0.4979384870828767 F F F  
0.2692675783408305 0.5624232143313321 0.9638381056201055 F F F  
0.2695251903032343 0.9385655008624809 0.9541251378792239 F F F  
0.1058125542893791 0.4430006047574651 0.4370251582289555 F F F  
0.0642840191429741 0.5569724490742800 0.9438003165362758 F F F  
0.2292479938773937 0.0626468192291441 0.4623686415361661 F F F  
0.2706600261270324 0.0590714383093527 0.0591343957612622 F F F  
0.1069435935723604 0.5626301902907187 0.5419850802262971 F F F  
0.0633678699849582 0.4351182684164954 0.0446314853727827 F F F  
0.2301706825793346 0.9433921029319094 0.5706231091660854 F F F  
0.2296251892141044 0.5490665288618075 0.6200011121017965 F F F  
0.0642107987220228 0.9390921142858204 0.9586468861993183 F F F  
0.2683534681653725 0.4407334940275121 0.0647571014091781 F F F  
0.1032509114494076 0.0570080520493548 0.4504036599966312 F F F  
0.3347080136847680 0.3142229646842125 0.1783045256860376 F F F  
0.4999085754573827 0.7468285838227686 0.5979577300613244 F F F  
0.6671665340190955 0.7669436607610223 0.8837442505750914 F F F  
0.3974432860421686 0.3588529249351353 0.3139979993996462 T T T  
0.4040064699751866 0.0494531694703326 0.0492363971151235 F F F  
0.4352700627741939 0.9385908544579706 0.5551726362006733 F F F  
0.5710419597048144 0.4289269787605505 0.4581519957872260 F F F  
0.6059996748905334 0.5594314904332052 0.9306766816666396 F F F  
0.6084908000290383 0.9355942190575206 0.9240907717594382 F F F  
0.3946483264798601 0.4944948529749240 0.3391283100714233 F F F  
0.4008266012557513 0.5532371914240670 0.9422581383241706 F F F  
0.5735210596278648 0.0548429676095310 0.4415412278049047 F F F  
0.6089363781858737 0.0576324730472209 0.0263530069434808 F F F  
0.4110580091188396 0.5993308934080019 0.4716608181886244 F F F  
0.4053695829066299 0.4334258105094477 0.0478871675650154 F F F  
0.5710771977372531 0.9347997029980277 0.5468734458452786 F F F  
0.5692408116807570 0.5485586360186687 0.5617397009467595 F F F  
0.4036850381037667 0.9273955027692367 0.9469550829901934 F F F  
0.6107901253697037 0.4392649451772925 0.0354959592140105 F F F  
0.4344595984248798 0.0571483467022773 0.4464286711840799 F F F  
0.6739743070840447 0.2820532838635685 0.1176556591665090 F F F  
0.8362250380824605 0.7624544572702163 0.6101923486518288 F F F  
0.0009086919209764 0.7294113730578573 0.8949360507127153 F F F  
0.8387628125753395 0.2289343996047819 0.3914565640319196 F F F  
0.7355637442769094 0.0615640660465999 0.0483771537397359 F F F  
0.7763195918447110 0.9277759999055633 0.5433072234531977 F F F  
0.9010313839752655 0.4351503219576713 0.4610852549728506 F F F  
0.9396967056936703 0.5540073991602981 0.9417425145098690 F F F  
0.9375168251905848 0.9306343234571273 0.9523864503516393 F F F  
0.7761911558646162 0.4398974974863137 0.4390794579865798 F F F  
0.7345173736213511 0.5589781141836383 0.9542443020953471 F F F  
0.8980057604980090 0.0598487925200146 0.4551469727368271 F F F  
0.9406616097804417 0.0512238945385022 0.0561332600277282 F F F  
0.7743076294105506 0.5607684098496506 0.5429975169044567 F F F  
0.7346602395274857 0.4390976850046542 0.0596268391376711 F F F  
0.8975212237716192 0.9401703520677316 0.5609615739339731 F F F  
0.9020767860581671 0.5554129183709264 0.5657501231803153 F F F  
0.7324373783738096 0.9409242201899275 0.9447576308407690 F F F  
0.9398813735524101 0.4340608896021649 0.0472169371087290 F F F  
0.7789138522985510 0.0474909562355066 0.4372068283427097 F F F  
0.4345470927318189 0.3371537849348272 0.4562908582520819 T T T  
0.4257372497853638 0.3108600792402925 0.6104121681097965 T T T  
0.5608338093556711 0.2761783171177967 0.5328949397417801 T T T  
0.5168864693243052 0.2427974238006030 0.4441430141244993 T T T

0.4226556114978877 0.2383972732098982 0.2422343766016866 T T T  
0.5896959342937578 0.2419270748511622 0.2420996948433540 T T T

Structure 10 S=5

1.0000000000000000  
20.9172000884999996 0.0000000000000000 0.0000000000000000  
0.0000000000000000 17.8076000213999990 0.0000000000000000  
0.0000000000000000 0.0000000000000000 12.2158002853000003

Al O C H Fe  
10 63 97 64 2

Selective dynamics

Direct

0.0845177954255334 0.2481405793114391 0.2536046179786808 F F F  
0.2501606303177013 0.7533129824065909 0.7623388368139672 F F F  
0.2476632196540223 0.2505106057761708 0.2533237075049328 F F F  
0.0844664372389445 0.7505452357432176 0.7567852804395017 F F F  
0.5859060006683947 0.7433444755081027 0.7405017504666489 F F F  
0.4174717914610895 0.7471599680303598 0.7469084552319742 F F F  
0.7574753964002809 0.2458868959185381 0.2492407096434661 F F F  
0.9187475369755020 0.7468162316971529 0.7523044630636448 F F F  
0.9208900152348534 0.2476716001563517 0.2518072146702295 F F F  
0.7527073243884388 0.7441459875798060 0.7497740864425424 F F F  
0.6756097405310939 0.2471112901086698 0.1784884654193348 F F F  
0.8360870615161886 0.7452948780424791 0.6856313791118396 F F F  
0.0012491695853569 0.7478961039361209 0.8201529731629122 F F F  
0.8387896174832079 0.2467812346535396 0.3163349260961681 F F F  
0.7856665047094396 0.1673232019479087 0.1488727166903416 F F F  
0.9497752535672390 0.6687319420334035 0.6514003600895961 F F F  
0.8918918465351950 0.3266638850682000 0.1511929817991273 F F F  
0.7258119582129368 0.8219262682684843 0.6454330921136773 F F F  
0.7791298769112984 0.8256749436860815 0.8510695822770344 F F F  
0.9488680981810234 0.3289593246956883 0.3507105255048657 F F F  
0.8913024591847645 0.6664080752128214 0.8503370122188798 F F F  
0.7297099990588691 0.1649828456297797 0.3470952064594002 F F F  
0.8878836854074876 0.8244722823616826 0.8535609821362584 F F F  
0.7286454235235524 0.3248488392454973 0.3500716556323837 F F F  
0.7826709392339168 0.6660129615705301 0.8500433821714353 F F F  
0.9470247441884041 0.1691964904655379 0.3553879216974636 F F F  
0.8942247195729536 0.1665977523267159 0.1491377138658123 F F F  
0.7244964544201125 0.6641539125733900 0.6515088056530871 F F F  
0.7835250301278975 0.3262002650240703 0.1504091119293136 F F F  
0.9458301709774943 0.8275874205000164 0.6545109676928647 F F F  
0.3329201224678897 0.2582222077175089 0.1937383336482696 F F F  
0.5010519259058199 0.7455507960363192 0.6767069091549018 F F F  
0.6688526689773937 0.7442834948615058 0.8110746639313788 F F F  
0.4264902273367594 0.3309943507635974 0.3435282400667012 T T T  
0.4521627512279593 0.1577029457299375 0.1352515187143339 F F F  
0.6158447556280038 0.6646084838259299 0.6449289290910443 F F F  
0.5648722705977747 0.3292487022360575 0.1418238723895868 F F F  
0.3880094384745973 0.8298681862384996 0.6544840359119419 F F F  
0.4508585899158035 0.8207762822139415 0.8466876878822518 F F F  
0.6200732898842531 0.3211395402090531 0.3600075633242952 F F F  
0.5548628639277595 0.6659237380952803 0.8394152700644497 F F F  
0.3882812976087138 0.1623938006926409 0.3479881843885764 F F F  
0.5595821272212618 0.8222862907997381 0.8389106892727273 F F F  
0.3303703592343581 0.4041174167875994 0.2390461114050808 F F F  
0.4460195896442798 0.6642929565468734 0.8406184801211225 F F F  
0.6216933033184731 0.1547026926897672 0.3342791183908744 F F F  
0.5610050858720328 0.1635595407526864 0.1225227976299053 F F F  
0.3830806755588156 0.6744504281903119 0.6440918134745743 F F F  
0.4562607065932269 0.3224907273534825 0.1325485919634204 F F F  
0.6169365587183151 0.8220489433316231 0.6394262114889742 F F F  
0.0026310015240512 0.2470395839482435 0.1872672713422006 F F F  
0.1671856227992805 0.7524169968242091 0.6939333384659534 F F F  
0.3354372519205384 0.7490711952085576 0.8213614735550649 F F F  
0.1658943668631068 0.2484310897949698 0.3204752141952625 F F F  
0.1142485259193506 0.1701213472189664 0.1548758706169906 F F F  
0.2743724511372321 0.6772440211207851 0.6593955444565864 F F F  
0.2186130999584250 0.3233715672145863 0.1429996999165368 F F F  
0.0543338243296674 0.8296642449731948 0.6582958337736216 F F F  
0.1125193051490641 0.8300467702465824 0.8571625236842024 F F F  
0.2633979343427129 0.3390578802241961 0.3498165529429542 F F F  
0.2215728891038466 0.6720722111963795 0.8621663062751992 F F F  
0.0555766425858693 0.1674713769446114 0.3538090702351937 F F F  
0.2211840960122302 0.8295653029506695 0.8610305172480182 F F F  
0.0572130418709449 0.3272527993077503 0.3540340670414110 F F F  
0.1127449011107942 0.6708365871710598 0.8583886429831225 F F F  
0.2802592019515231 0.1737335081264249 0.3590356562424049 F F F  
0.2227570510183838 0.1665170882861844 0.1623186971709174 F F F  
0.0585168467640642 0.6699017718871332 0.6529806645881067 F F F  
0.1104481490000211 0.3288533100246056 0.1520660132164053 F F F  
0.2795092902298038 0.8335853383856033 0.6651977838698429 F F F  
0.5147814773593710 0.2331610497215335 0.2991992775492179 T T T  
0.4726554175026320 0.4081634676205469 0.5927577214352298 T T T  
0.5223658530692928 0.2547329438976403 0.5244591111084997 T T T  
0.4474633430315325 0.3491824391682850 0.5764853073066795 T T T  
0.1684612464896205 0.1401169408873031 0.1334171493614704 F F F  
0.3268964285514855 0.6495169427990533 0.6246428142877321 F F F  
0.1649067185582851 0.3547948679183506 0.1230142486381141 F F F  
0.3334650736844438 0.8597567094032570 0.6348254088744198 F F F  
0.1665354197904279 0.8578372518745994 0.8843488872003533 F F F  
0.0029955281379586 0.3566819989860122 0.3775257444037692 F F F

0.1671388312562598 0.6428526744437022 0.8844464510788441 F F F  
0.0013163580121613 0.1400951588926418 0.3799435932783624 F F F  
0.1680003622882325 0.0675421567899903 0.0687772602572423 F F F  
0.3203241225524778 0.5819608387364212 0.5522635653016863 F F F  
0.1657658484549387 0.4286778180095752 0.0605567106170071 F F F  
0.0001727989398717 0.9296661564887572 0.5658468944113437 F F F  
0.1667840018519655 0.9302686952253651 0.9494773690727456 F F F  
0.3040665987325468 0.4597104167940884 0.4084464077735248 F F F  
0.1668052725632876 0.5687658949829668 0.9465287739295860 F F F  
0.0008064753811610 0.0673035198837937 0.4453202434818806 F F F  
0.1100633311446515 0.0327073843257395 0.0396549040294403 F F F  
0.2660471227768468 0.5356616246956918 0.5598660058243183 F F F  
0.2235690013004259 0.4658064605193388 0.0369726579831067 F F F  
0.0578783505246108 0.9639684264387967 0.5339000211871507 F F F  
0.1094283068374651 0.9653384077738565 0.9809934135451286 F F F  
0.2588924408609330 0.4738375895254734 0.4907539095637219 F F F  
0.2239678144644301 0.5344417206098697 0.9811291936286963 F F F  
0.0581840366898447 0.0312977967355579 0.4748560196938953 F F F  
0.2247342210235885 0.9650938779173899 0.9786055312177666 F F F  
0.0610874208184811 0.4672834986683867 0.4661719156627413 F F F  
0.1090828370101349 0.531520264332171 0.9703648506202569 F F F  
0.2744430515020184 0.0355012416473741 0.4830265858172353 F F F  
0.2253626859205298 0.0324715097334902 0.0372147310989490 F F F  
0.0616332806386595 0.5348090152667808 0.5248603212980782 F F F  
0.1085653640555080 0.4630607101925079 0.0264110200628664 F F F  
0.2749846219287022 0.9685969605034117 0.5431093092139889 F F F  
0.5070927756514720 0.1326092633090070 0.1050235075853791 F F F  
0.6707195622255782 0.6361481989997273 0.6234193182484020 F F F  
0.5093624061452147 0.3541876901700505 0.1127583344528418 F F F  
0.6718433037888545 0.8498500235140725 0.6172542771601925 F F F  
0.5054226714430641 0.8496193009443829 0.8667611065616683 F F F  
0.2977086637696331 0.3970423034715651 0.3260636395482024 F F F  
0.5009677560852808 0.6370490296178204 0.8646859745756146 F F F  
0.3326130577476931 0.1402402668475276 0.3799259859173461 F F F  
0.5065453405319715 0.0598387794763298 0.0426691122435656 F F F  
0.6717635030431168 0.5632246706634803 0.5593632351648594 F F F  
0.5078285937188554 0.4273269055822553 0.0488031462817418 F F F  
0.3327962062719223 0.9323308752632968 0.5694536892169495 F F F  
0.5059855770898380 0.9224175640935499 0.9289073692521370 F F F  
0.6739132231639857 0.4251121995440315 0.4420283968251013 F F F  
0.5028598145354763 0.5643621404902674 0.9292880175492044 F F F  
0.3318417456881946 0.0685725494449585 0.4471119424436196 F F F  
0.4485862276010693 0.0230511538984999 0.0201674860485994 F F F  
0.6147698161688808 0.5249685563067814 0.5343649216795185 F F F  
0.5641894621147969 0.4638875239627254 0.0155955572187594 F F F  
0.3900943583085805 0.9657208140903037 0.5341002955961542 F F F  
0.4483466205610540 0.9550591283080578 0.9638072941861822 F F F  
0.6158671548718502 0.4572094365409285 0.4766615606573552 F F F  
0.5617338305671709 0.5311266260036618 0.9568350553095115 F F F  
0.3896489865578943 0.0324614452373240 0.4740493768666241 F F F  
0.5638345165139000 0.9594944501458897 0.9509742062329565 F F F  
0.3580005963978223 0.5066185542244455 0.4007872104586383 F F F  
0.4465364470167543 0.5278124112489451 0.9625254596301147 F F F  
0.6181099591639807 0.0265282525611354 0.4631661054941532 F F F  
0.5641603848322632 0.0274903932056105 0.0072854728170526 F F F  
0.3671175165839315 0.5655581823826239 0.4738215006615931 F F F  
0.4488893264913401 0.4605446826899495 0.0213283669532984 F F F  
0.6166929722859678 0.9593619674195537 0.5221520159844957 F F F  
0.8397833585105943 0.1385280267331055 0.1239962519365179 F F F  
0.0043991080578536 0.6411162738801721 0.6270257120125748 F F F  
0.8378468589171604 0.3548795268395324 0.1254118038909127 F F F  
0.0001452764607066 0.8568975593822756 0.6310986312788387 F F F  
0.8336817452214689 0.8533986231288750 0.8770938708120255 F F F  
0.6745031987241532 0.3515913073069257 0.3789332474344533 F F F  
0.8369511641720209 0.6380573664852776 0.8754336118875798 F F F  
0.6766390665302282 0.1318143297542207 0.3660293332233095 F F F  
0.8384940577005651 0.0653163671853250 0.0596578179143208 F F F  
0.0045223826294105 0.5680147524101073 0.5619187788429443 F F F  
0.8375717560785247 0.4276296494747527 0.0605109274793634 F F F  
0.6735163964465372 0.9224434722140771 0.5519137722905540 F F F  
0.8347836201273822 0.9267576681230523 0.9413052271039462 F F F  
0.0034907076328139 0.4297936135590490 0.44214644436029083 F F F  
0.8371972917944817 0.5653169553323281 0.9406275237563477 F F F  
0.6764712606248011 0.0594484728563245 0.4315723540838547 F F F  
0.7800753824789481 0.0328184181405646 0.0273594012444320 F F F  
0.9468980960799342 0.5306506141393754 0.5375307905173088 F F F  
0.8950211126370959 0.4615451461515789 0.0265709592166914 F F F  
0.7318495990884415 0.9555450159739749 0.5207055880776039 F F F  
0.7782707873933816 0.9650568425381110 0.9694070677768352 F F F  
0.9463701142157177 0.4630992866996593 0.4789639737163824 F F F  
0.8947980608744857 0.5289383881956198 0.9677558838211269 F F F  
0.7333914747554928 0.0227687709901048 0.4615301098226965 F F F  
0.8931923712943544 0.9593077947977875 0.9735554737132759 F F F  
0.7309553979875005 0.4634245675202209 0.4668532945202770 F F F  
0.7797500207086330 0.5314912354093764 0.9747304196156321 F F F  
0.9431363359676936 0.0330281581282179 0.4773697124414227 F F F  
0.8950214857514922 0.0270602707677412 0.0315026349775991 F F F  
0.7298541354876065 0.5311935121148395 0.5245968162516164 F F F  
0.7799802360612205 0.4641020081165550 0.0335265992278764 F F F  
0.9428046794728928 0.9657030312678714 0.5364182890901574 F F F  
0.0030820364492428 0.2338996617978566 0.1101767203330795 F F F  
0.1689171973158921 0.7282339643202462 0.6226842579607634 F F F

0.3376737119883870 0.7302042752834197 0.8958443427136302 F F F  
0.1662087422831036 0.2770805044592919 0.3882265778184006 F F F  
0.0652702459140926 0.0592351897312753 0.0640972822119679 F F F  
0.1028378225854993 0.9369052584108317 0.5562031000171217 F F F  
0.2175933417500815 0.4368116162578772 0.4988028678866243 F F F  
0.2692513378074040 0.5624416384515101 0.9637386244279966 F F F  
0.2694987062961900 0.9385035010780030 0.9541415499087833 F F F  
0.1059354822716543 0.4430477015575747 0.4373284830409858 F F F  
0.0642541875463678 0.5570659787982351 0.9439575640046485 F F F  
0.2292241366300090 0.0628635888443938 0.4630707537628354 F F F  
0.2706045186806136 0.0589917671190605 0.0591952765503478 F F F  
0.1069740916429325 0.5626819231894160 0.5422688472610204 F F F  
0.0633675629583124 0.4351593455350624 0.0447252755388376 F F F  
0.2302228624431422 0.9434013669191827 0.5706471192055744 F F F  
0.2298146605213560 0.5485327921525496 0.6213170988874239 F F F  
0.0641838215028088 0.9389750239784149 0.9586341089804264 F F F  
0.2683528629352878 0.4407193938872638 0.0645794865678582 F F F  
0.1033727642162248 0.0569956696541141 0.4505609630401466 F F F  
0.3343135720693837 0.3128498874792740 0.1755931784184384 F F F  
0.4999289502841791 0.7474558996727225 0.5973490281077787 F F F  
0.6669744367330921 0.7667463284954437 0.8834752883684232 F F F  
0.3969591376561960 0.3690364225684965 0.3127645188974169 T T T  
0.4039677403508861 0.0485817060895997 0.0475412841382905 F F F  
0.4352763890292550 0.9385366937482260 0.5546409192401427 F F F  
0.5712133867720013 0.4284298852834851 0.4577299677549291 F F F  
0.6057065207717116 0.5589486165716764 0.9310800625395501 F F F  
0.6083877384701637 0.9342973827733942 0.9226974274842874 F F F  
0.3928545680365190 0.4963580356808635 0.3361215819942061 F F F  
0.4005275735795024 0.5527526309962312 0.9412922655591842 F F F  
0.5736685987426284 0.0547331219020393 0.4410453384083795 F F F  
0.6088471989615130 0.0566716172866890 0.0247786112990411 F F F  
0.4098414392286500 0.6005284431908890 0.4692571918610611 F F F  
0.4048044076677826 0.4331320762439148 0.0473662609175634 F F F  
0.5710979351262537 0.9346934319381859 0.5464194449794917 F F F  
0.5692915157775857 0.5485714978058311 0.5613459328941204 F F F  
0.4035613308350534 0.9262301185051172 0.9457037073676133 F F F  
0.6102614981320897 0.4389620669056455 0.0363341766467613 F F F  
0.4345171934472845 0.0576533068888807 0.4472246571553029 F F F  
0.6744767545475838 0.2820533794444628 0.1170695884866646 F F F  
0.8361453226089992 0.7624329994304020 0.6101728510950153 F F F  
0.0008244468232306 0.7293933564971127 0.8949330932525896 F F F  
0.8389779899215668 0.2292209153106413 0.3915673188180051 F F F  
0.7357511251761508 0.0616907628207244 0.0485431045357032 F F F  
0.7763336954351914 0.9277219325990060 0.5437015014107445 F F F  
0.9011402768617103 0.4351404443326956 0.4610027474618263 F F F  
0.9398052704253033 0.5541978360214443 0.9416432567288453 F F F  
0.9375174421544585 0.9304845360609093 0.9522611009417190 F F F  
0.7762914669903154 0.4393592851583463 0.4399520266770764 F F F  
0.7346304445208531 0.5589207384789177 0.9544298523803647 F F F  
0.8981325112531877 0.0599874288529065 0.4551367266400135 F F F  
0.9408452853897415 0.0510568533512483 0.0560173225490459 F F F  
0.7743663381456543 0.5603823689738903 0.5435877880798472 F F F  
0.7349377496179486 0.4390601838483335 0.0598886907897196 F F F  
0.8975470349392936 0.9403121007107345 0.5609702240560779 F F F  
0.9020925406606466 0.5554171867531252 0.5656523312575814 F F F  
0.7324435040659552 0.9410715402087888 0.9449114627535735 F F F  
0.9401551523685967 0.4342623871124118 0.0471719232251857 F F F  
0.7790757506935861 0.0473213663036276 0.4374422823078774 F F F  
0.4260781763666736 0.3323296123829099 0.4252261527988270 T T T  
0.4339182826724188 0.3059033338654352 0.6384550684259102 T T T  
0.5633362977028087 0.2810342406857286 0.5243856472732744 T T T  
0.5170361748827436 0.2422093640857528 0.4455954520382764 T T T  
0.4233838326898755 0.2361472529652088 0.2396583242929611 T T T  
0.5897015264933413 0.2416024985698522 0.2425046955537432 T T T

Structure TS11 S=5

1.0000000000000000  
20.9172000884999996 0.0000000000000000 0.0000000000000000  
0.0000000000000000 17.8076000213999990 0.0000000000000000  
0.0000000000000000 0.0000000000000000 12.2158002853000003

Al O C H Fe

10 63 97 64 2

Selective dynamics

Direct

0.0845481885963011 0.2481371872502223 0.2536261211323492 F F F  
0.2501515848198110 0.7533359713291077 0.7623722321612618 F F F  
0.2477698354461069 0.2504765250374703 0.2533248338178637 F F F  
0.084462229078951 0.7505561360353639 0.7567934324775791 F F F  
0.5859106908776042 0.7433208246551146 0.7405062464706731 F F F  
0.4174714884327599 0.7471563198908200 0.7468746451862032 F F F  
0.7574469179702348 0.2458585970324307 0.2492072058823567 F F F  
0.9187516910259603 0.7468199138410512 0.7523067789420210 F F F  
0.9208976116730909 0.2476694253953582 0.2517957471342243 F F F  
0.7527234765648245 0.7441376933980024 0.7498380727908085 F F F  
0.6756968634500495 0.2471524666268721 0.1786810460184896 F F F  
0.8360938422564956 0.7452805402429163 0.6856454322578145 F F F  
0.0012520679229056 0.7479014411674001 0.8201587736580294 F F F  
0.8387915635507568 0.2467985888107975 0.3163188982592047 F F F  
0.7857165699314521 0.1672931640789628 0.1488725198155407 F F F  
0.9497818449286441 0.6687369304327220 0.6514002544493209 F F F  
0.8919572913253688 0.3266633947033597 0.1511799529529156 F F F  
0.7258174141079650 0.8218491994134780 0.6454945943118986 F F F

0.7791343758113669 0.8256549525077119 0.8511062770596709 F F F  
0.9488896868270444 0.3289559335197438 0.3507383514903850 F F F  
0.8913175417791521 0.6664099296770019 0.850337699974606 F F F  
0.7297861238556678 0.1649112002281896 0.3472039339675916 F F F  
0.8878875969517921 0.8244607790552294 0.8535605185476243 F F F  
0.7286184257743997 0.3248775913292050 0.3501496907089319 F F F  
0.7826863056205724 0.6660015179989713 0.8500627050836869 F F F  
0.9470430509615397 0.1692043217114758 0.3553962891933864 F F F  
0.8942736043859085 0.1665812461986533 0.1491395104444848 F F F  
0.7245158438340411 0.6641325750645422 0.6515624189689362 F F F  
0.7835902922687268 0.3262317751064785 0.1504577126314643 F F F  
0.9458305643617564 0.8275901621688888 0.6545118968221573 F F F  
0.3331023781716951 0.2580788542793258 0.1941852191223461 F F F  
0.5010564997992617 0.7455112589568813 0.6766646422394942 F F F  
0.6688549779053119 0.7442372406189222 0.8111095147931096 F F F  
0.4267000494980218 0.3330868117351310 0.3436443844197651 T T T  
0.4519661756599902 0.1576987422815392 0.1347824090426997 F F F  
0.6158590276929914 0.6645842644833095 0.6449411154087983 F F F  
0.5646305779260743 0.3294153309310630 0.1420825119592948 F F F  
0.3880183054230031 0.8298673873434979 0.6544592601107695 F F F  
0.4508658274440123 0.8206978978050614 0.8466728260679943 F F F  
0.6200727733179079 0.3208595965344472 0.3609217916842198 F F F  
0.5548477463783641 0.6658731407599490 0.8393440410850275 F F F  
0.3882980782297309 0.1629374615213450 0.3490286684521919 F F F  
0.5595899637498150 0.8222142941514790 0.8389272992560350 F F F  
0.3305115240529446 0.4041206181257522 0.2391505610772739 F F F  
0.4460019829143960 0.6642756424396481 0.8405157635161160 F F F  
0.6217910315620969 0.1545339708608395 0.3344356016813279 F F F  
0.5608092818330590 0.1635169371859675 0.1224800882740666 F F F  
0.3830553731581290 0.6744754538746278 0.6440483275144331 F F F  
0.4559914943559633 0.3228827968699335 0.1333698641058234 F F F  
0.6169423591797383 0.8219806527171514 0.6394420343232738 F F F  
0.0026624593813835 0.2470461496397718 0.1872972453819415 F F F  
0.1671825384807022 0.7524315616438173 0.6939523595768051 F F F  
0.3354337081986785 0.7490646442421180 0.8213480818252421 F F F  
0.1659506772283805 0.2484710075164358 0.3204505548880405 F F F  
0.1142701292188164 0.1701145530565498 0.1549137123929967 F F F  
0.2743454102973644 0.6772682334740168 0.6594229477469540 F F F  
0.2186913459525073 0.3234073841996050 0.1430709050163372 F F F  
0.0543334493545444 0.8296709888723797 0.6583068948937978 F F F  
0.1125205157878924 0.8300515816105900 0.8571779163140008 F F F  
0.2635062523084812 0.3390967972636929 0.3499220905165501 F F F  
0.2215658134376781 0.6720761796574948 0.8621839899941079 F F F  
0.0555973759511161 0.1674830611136855 0.3538428907498741 F F F  
0.2211849772456773 0.8295732034174179 0.8610499046107449 F F F  
0.0572387202842393 0.3272641739134627 0.3540406002925138 F F F  
0.1127382841616082 0.6708345523083139 0.8583999466914989 F F F  
0.2801931410920488 0.1737116839376824 0.3591063895289963 F F F  
0.2227834720313453 0.1665318660716721 0.1622826501046930 F F F  
0.0585231514855806 0.6699107712277126 0.6529839305883840 F F F  
0.1105103029731467 0.3288207074867486 0.1520483463836939 F F F  
0.2795194125741745 0.8335949846278723 0.6652080750179081 F F F  
0.5144725288278498 0.2331776433463726 0.2984680035475539 T T T  
0.4565687150939252 0.4218228052790675 0.6079992649443713 T T T  
0.5288719857213421 0.2407364851620860 0.5268524799737099 T T T  
0.4426065921452776 0.3603803737301484 0.5791405937718551 T T T  
0.1684825745162399 0.1401239449480798 0.1334219259952008 F F F  
0.3268636017410671 0.6495619565661030 0.6246334277125101 F F F  
0.1649655984907952 0.3547859618576794 0.1230391288589345 F F F  
0.3334724400708708 0.8597611271446723 0.6348129110871739 F F F  
0.1665339686792535 0.8578457500477796 0.8843657134408787 F F F  
0.0030148653423296 0.3566814004571910 0.3775389826602549 F F F  
0.1671316975146198 0.6428529986360019 0.8844587894588543 F F F  
0.0013321058435380 0.1401055428291826 0.3799594835770748 F F F  
0.1680099968494062 0.0675479505543848 0.0687821935168174 F F F  
0.3202755139170961 0.5820358971231698 0.5522181471199730 F F F  
0.1657929414120147 0.4286689608217884 0.0605658588431268 F F F  
0.0001745241011193 0.9296708211232527 0.5658520130757125 F F F  
0.1667852898560653 0.9302753718344476 0.9494885987466759 F F F  
0.3040172851998406 0.4598332863038692 0.4083832663550453 F F F  
0.1668036185158073 0.5687620084222758 0.9465362489208005 F F F  
0.0008164383127252 0.0673099832855186 0.4453305261881297 F F F  
0.1100693918427780 0.0327168326620324 0.0396656165126927 F F F  
0.2660607690035732 0.5356525390773470 0.5599658610113352 F F F  
0.2235859374135742 0.4658081647741312 0.0369580928393844 F F F  
0.0578821495549846 0.9639700041596342 0.5339086556592534 F F F  
0.1094308072045109 0.9653473724644925 0.9810053019100309 F F F  
0.2589047893594270 0.4738419806617244 0.4908308201701104 F F F  
0.2239723826489097 0.5344433540179807 0.9811163952503748 F F F  
0.0581914962524124 0.0313000145494939 0.4748671435516698 F F F  
0.2247379022739366 0.9650967135470481 0.9786119743493131 F F F  
0.0610997727670366 0.4672854497683687 0.4661969861321467 F F F  
0.1090877311228766 0.5315070242021918 0.9703915845583069 F F F  
0.2744380696917617 0.0355064825251930 0.4830349302753945 F F F  
0.225369899812804 0.0324747896185613 0.0372180199704175 F F F  
0.0616433085303285 0.5348124603613087 0.5248811004980354 F F F  
0.1085831006386613 0.4630451050660795 0.0264381415273860 F F F  
0.2749856417476977 0.9685927422421656 0.5430941899868600 F F F  
0.5069787054978576 0.1325497549193244 0.1048024068070319 F F F  
0.6707424528518402 0.6361447940243607 0.6234647738068020 F F F  
0.5092079265240841 0.3543776615327658 0.1131338253964742 F F F  
0.6718558959318983 0.8497799723787693 0.6172925867122387 F F F

0.5054269470781918 0.8495457555291068 0.8667617640428347 F F F  
0.2977509774326776 0.3971219844301999 0.3260750124212919 F F F  
0.5009427794857757 0.6370265267828472 0.8646154765959082 F F F  
0.3326053317908020 0.1404069386861764 0.3802578882426033 F F F  
0.5064536105567541 0.0597501851092161 0.0425677227477621 F F F  
0.6717904866175957 0.5632236823320440 0.5594227721786211 F F F  
0.5076562311464059 0.4273966222257286 0.0488832225572082 F F F  
0.3328007339293464 0.9323309108944784 0.5694300935363827 F F F  
0.5059700798276907 0.9223301963529877 0.9288909148241515 F F F  
0.6739380879053485 0.4250755199535448 0.4422279258976047 F F F  
0.5027979336783517 0.5643634231648562 0.9292431123813998 F F F  
0.3318359285719126 0.0686114269838711 0.4471716342097736 F F F  
0.4485136899208300 0.0229370318815540 0.0200670019586227 F F F  
0.6147814446893918 0.5250288268076062 0.5343261670678174 F F F  
0.5640518912679227 0.4638872729150805 0.0156730975985653 F F F  
0.3900944381911984 0.9657257304867812 0.5340641457657824 F F F  
0.4483097415856179 0.9549360394414919 0.9637463616680719 F F F  
0.6158886810483111 0.4572541526844915 0.4766851562954599 F F F  
0.5616524194429289 0.5311037676445096 0.9568569100429016 F F F  
0.3896446160856399 0.0324886137160831 0.4740619022401162 F F F  
0.5638069412151125 0.9594307898903125 0.9509630963611286 F F F  
0.3578732290762900 0.5068503542597043 0.4005482115821977 F F F  
0.4464444104320862 0.5278660613834987 0.9624448025212544 F F F  
0.6181988919661094 0.0264585063636105 0.4632318231508634 F F F  
0.5640947622993835 0.0274342058927886 0.0072465998053985 F F F  
0.3669970406973917 0.5657707697961385 0.4735929770938867 F F F  
0.4487472609255860 0.4606250250617592 0.0213131110437246 F F F  
0.6167446404901682 0.9592894070857696 0.5221891454815122 F F F  
0.8398291802804039 0.1385071452764493 0.1240025695738822 F F F  
0.0044059126800136 0.6411232037372159 0.6270278645123497 F F F  
0.8379043257811034 0.3548869727727535 0.1254325035093444 F F F  
0.0001448773285730 0.8569036952532372 0.6311031078171609 F F F  
0.8336881684128201 0.8533859585994250 0.8771132287301455 F F F  
0.6744977927422724 0.3514818858354687 0.3793258066820471 F F F  
0.8369715166005491 0.6380517746321885 0.8754440238966126 F F F  
0.6767380166478389 0.1316903253446995 0.3661826737763505 F F F  
0.8385354032539425 0.0652938984768738 0.0596653687396085 F F F  
0.0045310103269856 0.5680214910738641 0.5619241485802746 F F F  
0.8376272223532197 0.4276356162404440 0.0605193804334689 F F F  
0.6735555952707202 0.9223563960028898 0.5519727223530779 F F F  
0.8347972253336877 0.9267401118555441 0.9413187454964387 F F F  
0.0035052374165332 0.4297963384923946 0.4421596341118459 F F F  
0.8372269529333920 0.5653155579513580 0.9406317425433528 F F F  
0.6765842568054836 0.0593441336202005 0.4317022434339535 F F F  
0.7801084759613346 0.0328035778638380 0.0273931977718433 F F F  
0.9469077899031859 0.5306588344098486 0.5375240234111942 F F F  
0.8950697802331575 0.4615580664705590 0.0265676859439807 F F F  
0.7319115218433225 0.9554273540556437 0.5208230398150988 F F F  
0.7782897652272069 0.9650426222184763 0.9694423353768258 F F F  
0.9463825146567331 0.4631055900915584 0.4789615858062604 F F F  
0.8948344159926620 0.5289493038011699 0.9677491852178690 F F F  
0.7334891154910679 0.0226532071006602 0.4616704733881178 F F F  
0.8932136449142831 0.9592834011431535 0.9735425582757316 F F F  
0.7309786719152314 0.4633648026653532 0.4670699568553189 F F F  
0.7797850281156400 0.5314811336219734 0.9747424865851002 F F F  
0.9431438159736487 0.0330370028972951 0.4773740803281328 F F F  
0.8950560581076559 0.0270348835549328 0.0314885625959036 F F F  
0.7298793917424931 0.5311567346371859 0.5247571074113964 F F F  
0.7800280752984818 0.4640938175317402 0.0335415130158196 F F F  
0.9428082437203713 0.9657108762690427 0.5364208120450797 F F F  
0.0031051089406517 0.2339698788419540 0.1101837006609117 F F F  
0.1689154522105270 0.7282411938683921 0.6227089111630875 F F F  
0.3376824216149075 0.7302189777673718 0.8958408846521735 F F F  
0.1662427714272710 0.2770886555766410 0.3882287385899232 F F F  
0.0652764650765931 0.0592448381472224 0.0641089446610863 F F F  
0.1028401499430700 0.9369044077186715 0.5562136293746960 F F F  
0.2176662008077130 0.4367336631587833 0.4989913734351887 F F F  
0.2692510582193748 0.5624491156931271 0.9637127838373019 F F F  
0.2695012983297005 0.9385043694212101 0.9541482145651941 F F F  
0.1059483238670751 0.4430449680850259 0.4373644353797133 F F F  
0.0642532632541375 0.5570489195110184 0.9440015805251463 F F F  
0.2292149638459762 0.0628668926119005 0.4631012718821950 F F F  
0.2706114701668056 0.0589953009581379 0.0591985830608550 F F F  
0.1069828187814679 0.5626851266248849 0.5423001885754886 F F F  
0.0633862805151537 0.4351439074272747 0.0447636971409580 F F F  
0.2302266123651577 0.9433947375624001 0.5706411917474981 F F F  
0.2298839154853880 0.5484477404540726 0.6215470193041099 F F F  
0.0641856520994253 0.9389844350566463 0.9586474450518025 F F F  
0.2683731843454993 0.4407189154471851 0.0645432754005668 F F F  
0.1033810705900038 0.0569961720477536 0.4505734484266455 F F F  
0.3345200183144144 0.3125268348062420 0.1752837829654936 F F F  
0.4999479020544086 0.7476662903244460 0.5973203494538595 F F F  
0.6669643231782203 0.7667206461821792 0.8834957660217455 F F F  
0.3975606519795712 0.3694870784280528 0.3071348653420699 T T T  
0.4038887729890703 0.0484694726085593 0.0474017309346664 F F F  
0.4352805047435595 0.9385447681386907 0.5545854467502451 F F F  
0.5712579325344933 0.4285102984080140 0.4574151049825090 F F F  
0.6056456382610236 0.5589014461227109 0.9311417442208167 F F F  
0.6083711555765987 0.9342508470615698 0.9227015196435531 F F F  
0.3926517747430722 0.4966404597043521 0.3357544007070885 F F F  
0.4004573665430513 0.5528395546752733 0.9411657630602406 F F F  
0.5737835908178610 0.0547106178010921 0.4410880065926364 F F F

0.6087613497686064 0.0566570511573801 0.0247529206207560 F F F  
0.4096595216645937 0.6008368430120470 0.4689051946725655 F F F  
0.4046522697870572 0.4332400960361511 0.0473595383284859 F F F  
0.5711372563995738 0.9346363125659778 0.5464202771122260 F F F  
0.5693190676811568 0.5487499111377687 0.5611720666526878 F F F  
0.4035417585596761 0.9260782291247693 0.9456261758185889 F F F  
0.6100997193155706 0.4389324319951911 0.0365083803700372 F F F  
0.4345115585878716 0.0576938600511951 0.4472546542292974 F F F  
0.6745632296375632 0.2818860669922358 0.1170312418425823 F F F  
0.8361391231559381 0.7624514866025578 0.6102027216395172 F F F  
0.0008240801276642 0.7293891991920205 0.8949336769419602 F F F  
0.8389748798229562 0.2291618141213121 0.3915144526647438 F F F  
0.7357909863810121 0.0616831250631051 0.0485988924468685 F F F  
0.7763771176954180 0.9275801052875323 0.5438530428379735 F F F  
0.9011540919197358 0.4351466450080181 0.4609887635296701 F F F  
0.9398351229991562 0.5542192070681793 0.9416257540772932 F F F  
0.9375324510332419 0.9304547511413475 0.9522271560689504 F F F  
0.7763101372593724 0.4392577914584663 0.4402235398583656 F F F  
0.7346612418095688 0.5589041676448474 0.9544481139575325 F F F  
0.8981411401675459 0.0599982934250960 0.4551397321294743 F F F  
0.9408837813716389 0.0510295708487689 0.0559851873725137 F F F  
0.7743909031939253 0.5603342751939309 0.5437887284513536 F F F  
0.7349928324156991 0.4390374289027363 0.0599123261339827 F F F  
0.8975487684210393 0.9403232325733981 0.5609701229362756 F F F  
0.9021019082795405 0.5554308583608574 0.5656346461201451 F F F  
0.7324567724715294 0.9410626671987501 0.9449660109030873 F F F  
0.9402078070352502 0.4342826507187070 0.0471634582788525 F F F  
0.7791784191039000 0.0472029551213780 0.4376053053758611 F F F  
0.4178520783533409 0.3341322193107887 0.4233713927525420 T T T  
0.4600670586819544 0.3050296376001423 0.6122683176499281 T T T  
0.5698413384599598 0.2667801101284018 0.5244173280080782 T T T  
0.5200482539832401 0.2324888655596586 0.4481156901146366 T T T  
0.4236501544576630 0.2359516300265460 0.2399537091775510 T T T  
0.5896939973671474 0.2415423500359385 0.2428010089491180 T T T

Structure CO+H2O/7 S=5

1.0000000000000000  
20.9172000884999996 0.0000000000000000 0.0000000000000000  
0.0000000000000000 17.8076000213999990 0.0000000000000000  
0.0000000000000000 0.0000000000000000 12.2158002853000003

Al O C H Fe

10 63 97 64 2

Direct

0.0842162563454297 0.2482762317258458 0.2541136929507886  
0.2500189361091073 0.7532818875525359 0.7627799024736813  
0.2470009614308500 0.2504496614227243 0.2532588009619871  
0.0844019585559973 0.7509670758405249 0.7569438176012483  
0.5861213616047548 0.7417513692355755 0.7398930631229564  
0.4174565847015475 0.7459653302253814 0.7457566114426807  
0.7588066436239215 0.2451010760910643 0.2499279530281835  
0.9188328678035415 0.7470693570622908 0.7525765660476785  
0.9213303518167565 0.2476285505021305 0.2522080105214484  
0.7529299802948765 0.7436923761794235 0.7504254273279023  
0.6795969109329467 0.2478904843416555 0.1761474871467323  
0.8362124119354903 0.7453426133929959 0.6859959562572788  
0.0012897360883350 0.7483061488234761 0.8204670768400026  
0.8397123123103598 0.2468651492441345 0.3169840040173437  
0.7867954361867838 0.1663564892805535 0.1503238593039150  
0.9498841275490263 0.6691200737825219 0.6515826174262590  
0.8934646822040470 0.3268162365583205 0.1512027985990946  
0.7255794953728365 0.8208606031435786 0.6463613543037749  
0.7790216431121806 0.8253350561106283 0.8517335228557895  
0.9489072552739192 0.3290730755738712 0.3518298225671033  
0.8916966804958486 0.6665387818586158 0.8505172868638321  
0.7315201017494639 0.1641187067821428 0.3492481603095842  
0.8877847053407204 0.8243142378638203 0.8538571554653537  
0.7298236682653392 0.3244299660506766 0.3506919253449350  
0.7830757516380686 0.6658362837788481 0.8504980335386071  
0.9472325148159292 0.1693299530494101 0.3559159730608593  
0.8952092935800111 0.1662227705316515 0.1493696067011874  
0.7252909952228720 0.6633778458795360 0.6519838259523316  
0.7852474216698826 0.3262890186816367 0.1510045451782895  
0.9458217623826729 0.8278888725838084 0.6549429302378662  
0.3314631672719066 0.2577015400684941 0.1939590351224713  
0.5011546515033189 0.7440913831568278 0.6756452198101388  
0.6689177463167313 0.7428435154528886 0.8112539577467682  
0.4174634622148368 0.3274319695330884 0.3606050914527434  
0.4498835190125105 0.1572312460612550 0.1275514711745113  
0.616633203023872 0.6635185998826096 0.6444073988679091  
0.5630973141411874 0.3299584121319489 0.1437807552158932  
0.3885434020152384 0.8296619299855664 0.6545017917594512  
0.4511472338783739 0.8180394373071422 0.8471413462322365  
0.6218999887174417 0.3164054358839010 0.3671858006889541  
0.5545987776776352 0.6639742617303861 0.8377340827066949  
0.3862025950034574 0.1632686999638500 0.3502201597203973  
0.5598700751672024 0.8198448835694779 0.8393850962664611  
0.3286110471683065 0.4051656855771481 0.2343277449160944  
0.4457149218316943 0.6623320521269945 0.8377891179141372  
0.6247619828954232 0.1500514881311617 0.3269474171885383  
0.5582813044220291 0.1640551846619299 0.1167724735752972  
0.3821792318869405 0.6746540106630943 0.6416137896403934  
0.4545732768094932 0.3249471012576113 0.1411434294235934

0.6167207247709271 0.8208124456334488 0.6395196945024951  
0.0027507316946028 0.2470005385157691 0.1880027658834567  
0.1671524357530203 0.7528235511783143 0.6941822982108588  
0.3354802077289917 0.7480881441904766 0.8207826184797115  
0.1654989284845085 0.2494045288482563 0.3206587547807729  
0.1137133790654562 0.1701213643155745 0.1553559904210389  
0.2735304839658153 0.6770683725460602 0.6593686535335150  
0.2175058686262308 0.3235198084091223 0.1429432491364011  
0.0543231174072561 0.8300190373709014 0.6587132676259431  
0.1126789651476373 0.8302322789029877 0.8573331822360625  
0.2641952376289906 0.3397896425659976 0.3492953850697070  
0.2212537423641572 0.6720826991047506 0.8624502943430584  
0.0557237806691305 0.1676655451355047 0.3544570424012833  
0.2213557819816702 0.8296777470927398 0.8614388283223395  
0.0572186294774051 0.3274397206084252 0.3549693760791565  
0.1124326488286593 0.6712528964159171 0.8585891487896148  
0.2782200114231975 0.1739499084068885 0.3610342928383453  
0.2221430791500735 0.1664205902576258 0.1628624903419574  
0.0586142490606206 0.6703336582183840 0.6531476547593299  
0.1093785117923036 0.3290067894361536 0.1519888757468463  
0.2800384423835403 0.8332247118356723 0.6656298248959264  
0.5084632797232032 0.2252907730160585 0.3064100926532332  
0.4573395762432910 0.4515580303688574 0.5891094742083030  
0.5407360836002245 0.2433876557222862 0.5179482770450833  
0.4600375621841440 0.3875725144943883 0.5929581787711556  
0.1678620077823574 0.1400630181520143 0.1338819910360199  
0.3258249679982999 0.6501953000042981 0.6225198182297277  
0.1638310355340921 0.3549349271270626 0.1229035220977354  
0.3339150681059133 0.8595768657795961 0.6352153818777637  
0.1666670939700928 0.8579810054697430 0.8846631666138471  
0.0029961318016836 0.3568589444317622 0.3785026525922936  
0.1667225751659437 0.6430607133343282 0.8846600367319734  
0.0014695627679437 0.1402329729266325 0.3805276605235622  
0.1674915218302917 0.0675476408521199 0.0691751472458152  
0.3186591636116460 0.5839288562878712 0.5478074116254076  
0.1646783257574889 0.4288219404710039 0.0604196467431109  
0.0001551476868316 0.9299326046556000 0.5662834596334004  
0.1667515816272021 0.9303650190628071 0.9498158849057377  
0.3019784034550548 0.4626511704316495 0.4026494566046371  
0.1661212505371444 0.5689629313079031 0.9466162536365008  
0.0008799557036196 0.0674827660846972 0.4458392441049691  
0.1096518080781705 0.0325812931682084 0.0398571429441773  
0.2674071904690875 0.5337272253704309 0.5613955237404837  
0.2225867783517303 0.4655687461256284 0.0364328089742501  
0.0578954536297405 0.9641675781613327 0.5343990204604586  
0.1092622450348943 0.9652287178275927 0.9811526322848376  
0.2601729728864526 0.4724066075014000 0.4913142275088520  
0.2231923343216994 0.5342430312426548 0.9807475845723788  
0.0582402277863748 0.0314786485962680 0.4753652247225227  
0.2245904683009124 0.9653554769325742 0.9791215646476042  
0.0611509529612852 0.4672957966792703 0.4673742679038335  
0.1082667854171335 0.5320978632723842 0.9707965689983027  
0.2736009099188665 0.0352229658407919 0.4850395291196296  
0.2249764545479372 0.0327041510117654 0.0377737498284815  
0.0617372034301615 0.5348876724943430 0.5258808591452785  
0.1075445951501382 0.4636036318603367 0.0267681732996209  
0.2747908704361185 0.9682202690465443 0.5448265447550448  
0.5049437663945819 0.1319099269134709 0.0988953017725351  
0.6716777282930587 0.6352471447989821 0.6236011013149614  
0.5080489980571746 0.3556035855149171 0.1172176530731143  
0.6716816099019064 0.8487594985912402 0.6177954594264440  
0.5056649874428536 0.8470098821618367 0.8671441551511402  
0.2966777118978276 0.3988650713090390 0.3218320992494993  
0.5005996090831365 0.6354642317446351 0.8631340841181721  
0.3308043086464216 0.1405696620265995 0.3815608839547709  
0.5054143380639725 0.0584298686407931 0.0388748491256168  
0.6729692194812502 0.5621458709516667 0.5601288516246455  
0.5061425874898392 0.4280785987143695 0.0521363238487708  
0.3328978941329721 0.9323016650550671 0.5702550705144128  
0.5059833904752713 0.9198987073737424 0.9286883121136291  
0.6751746206313338 0.4232190180081166 0.4448780083931798  
0.5021375224136725 0.5636148222545690 0.92953575900034775  
0.3306107320384871 0.0687399145902313 0.4484867576321470  
0.447759729080485 0.0208089458614953 0.0172383500847446  
0.6158807070485663 0.5251833527912121 0.5319467565584155  
0.5628116040585116 0.4642091947957078 0.0193650731723616  
0.3898745484428709 0.9661748351914485 0.5342836053947411  
0.4480571313213916 0.9522253000438876 0.9626392894581679  
0.6170701371838996 0.4570354067101120 0.4753331442675824  
0.5608536895745879 0.5307968222852235 0.9591009395440808  
0.3887662367098127 0.0330327721947067 0.4745153315019405  
0.5636125750548359 0.9575350290249285 0.9503125111711380  
0.3523392458037807 0.5140282127211411 0.3882732123716599  
0.4455376170213788 0.5275891361098994 0.9626385581061060  
0.6192895100381001 0.0251721457539400 0.4620889571845976  
0.5633952409575481 0.0261770077867552 0.0049411684601752  
0.3617791124694646 0.5726860836082188 0.4616545344973066  
0.4474226856361617 0.4610024813081997 0.0230856162996048  
0.6171711722376187 0.9582358248672530 0.5215024635227105  
0.8408075955627844 0.1378308707039040 0.1247924671361703  
0.0044995519864526 0.6414989253359417 0.6272522609402321  
0.8393314775482681 0.3550303150272352 0.1256570435908297



0.0001135772190524 0.8572214919474661 0.6315139536398057  
0.8335838513232402 0.8531377365645735 0.8776264762855003  
0.6757357821708875 0.3492153192563733 0.3829173344211039  
0.8374412470346886 0.6380348876294032 0.8757374993939485  
0.6787301058830087 0.1292352213366717 0.3647823659775854  
0.8391891440971406 0.0647287738203603 0.0603997424939065  
0.0046146162842084 0.5683601759901158 0.5623411437709811  
0.8387837709582145 0.4277366546797708 0.0606699652984435  
0.6737019002315610 0.9212253055849949 0.5526386588331239  
0.8348500260180379 0.9263903632980782 0.9419146677261303  
0.0035096158321662 0.4300306037094080 0.4429638220792390  
0.8378908463201583 0.5653415833457851 0.9408303765436371  
0.6780545978077759 0.0577214017464506 0.4318330695757205  
0.7805684012634674 0.0323237658668621 0.0289196269288441  
0.9469415251880886 0.5312249250948594 0.5375677682961113  
0.8960851890888576 0.4618380021187241 0.0265541233227172  
0.7323890332075473 0.9540446448574484 0.5228430844796714  
0.7784602969124256 0.9646357558581278 0.9708493928088444  
0.9463765485584587 0.4636094962658472 0.4791830142633565  
0.8956226547383004 0.5292119415685007 0.9677483140504290  
0.7345912415635716 0.0211293902380213 0.4635478500369615  
0.8934309020614986 0.9588731674273292 0.9733862540554629  
0.7322694912208556 0.4605192877508437 0.4723598834870861  
0.7805534463330460 0.5313078886000233 0.9750105562044746  
0.9431624843376615 0.0332746147083968 0.4777864749575881  
0.8955594863286093 0.0265573351969117 0.0314013964958759  
0.7311636331865570 0.5286632706107112 0.5291734331228679  
0.7810357040052774 0.4639309051836138 0.0338073366787989  
0.9427914896802229 0.9659578171782832 0.5368252661883725  
0.0030890381755576 0.2375082904019765 0.1098119200049569  
0.1688962227087536 0.7279836270766498 0.6234075644680421  
0.3379624555083411 0.7301225708588395 0.8957079312441855  
0.1655695853450193 0.2784804879845246 0.3880024336115016  
0.0647724876661564 0.0589815351808997 0.0641518360303001  
0.1028286196600744 0.9370641352654185 0.5567315227563130  
0.2215895382830592 0.4321012149438445 0.5041111224098904  
0.2685581637622333 0.5619855857341073 0.9631257216897446  
0.2694499303975392 0.9389414426851370 0.9547771605353426  
0.1060122912142132 0.4428295994152517 0.4390018854471298  
0.0635066498687440 0.5579856294566844 0.9447452827796008  
0.2281896901810042 0.0623690189009755 0.4657748505096790  
0.2701003822677077 0.0594183898469192 0.0599535783646239  
0.1071152118832579 0.5625779381205507 0.5436324517206153  
0.0622349073224852 0.4360494469452331 0.0453965916220488  
0.2302948327562855 0.9426515034565444 0.5728260819827139  
0.2337884155907856 0.5429387345353804 0.6283802319221782  
0.0641166252423521 0.9387050068243719 0.9586100960660043  
0.2672766916146510 0.4401199863876205 0.0637306640260583  
0.1034147178830838 0.0571884263199246 0.4510357416921905  
0.3330941509503245 0.3120571968619165 0.1747164875367595  
0.5003030550807083 0.7515379184339028 0.5969654390827368  
0.6666709456854805 0.7658948299923135 0.8832340478137931  
0.3981454164964324 0.3661419745925297 0.3125323613876135  
0.4029831225393804 0.0463283217135992 0.0437849175016657  
0.4353401993732915 0.9393464475728950 0.5540182019859672  
0.5724623105020343 0.4293350471155278 0.4528025245434854  
0.6050218188416844 0.5584101678133185 0.9338105423235062  
0.608344466412267 0.9323326246355950 0.9228327070194721  
0.3841970632715072 0.5067868308179684 0.3184034587282170  
0.3997268095757771 0.5524441665555242 0.9400576467841080  
0.5751509608679347 0.0534701048045407 0.4384251352027368  
0.6079094208120092 0.0558653496866970 0.0219439046840546  
0.4019943614432356 0.6111162729561701 0.4519969583005509  
0.4032314050080390 0.4338463306614699 0.0491772938901322  
0.5713127858140677 0.9337996868771322 0.5448533033804015  
0.5704212213405123 0.5505753842306813 0.5553822258911683  
0.4035528936417810 0.9227157289156250 0.9449216150975659  
0.6086419890199823 0.4393678176649017 0.0418988407643178  
0.4333665237817639 0.0585987380425936 0.4470661382758711  
0.6814079758149384 0.2824538339427680 0.1144503213120700  
0.8361493315288180 0.7626587832530975 0.6106271960463129  
0.0009041861746841 0.7290623262149095 0.8948512514235590  
0.8398608155633516 0.2300322053302014 0.3925580360047365  
0.7363612624589524 0.0611995489412878 0.0508236443824368  
0.7765658219591449 0.9260533028614633 0.5469979912329721  
0.9011211219117974 0.4358302337869369 0.4608209811079076  
0.9405113463363902 0.5546604901977916 0.9414636322304998  
0.9376339110573806 0.9300523313854827 0.9514181083885157  
0.7776890246750349 0.4352756051458301 0.4483347640188161  
0.7353532696754794 0.5585857250734128 0.9547617496138351  
0.8981820136405017 0.0602646403808933 0.4554931356049199  
0.9414467330219183 0.0506451598875379 0.0553564980958834  
0.7757269993624645 0.5569927309501687 0.5504667113803364  
0.7360820284587400 0.4386975703113166 0.0602485857222501  
0.8975272489256236 0.9405698531703420 0.5613437257473463  
0.9021495742018002 0.5562735841923609 0.5652192473718312  
0.7325169654887514 0.9406714535670776 0.9469273924298800  
0.9412808097581630 0.4346784901608529 0.0470626860597958  
0.7804412527620432 0.0456453365498307 0.4403645653447805  
0.3828710927003176 0.3131082424937282 0.4101020585307886  
0.5124453255827727 0.2776563703584216 0.5573485680987308  
0.5738568156549005 0.2757207175569976 0.4849107533541560

0.5112101104188446 0.2279749978087298 0.3882714214727846  
0.4227579298549468 0.2337663796688561 0.2361621711866226  
0.5914093247731141 0.2372499228236734 0.2351953482589175

Structure CO+H2O/3 S=4

1.000000000000000  
20.9127000884999996 0.0000000000000000 0.0000000000000000  
0.0000000000000000 17.8076000213999990 0.0000000000000000  
0.0000000000000000 0.0000000000000000 12.2158002853000003

Al O C H Fe

10 63 97 62 2

Direct

0.0851234888001148 0.2480494549749700 0.2538138598121685  
0.2502241109682444 0.7534096923074307 0.7620473738873105  
0.2489272190000767 0.2494341837024292 0.2546093635733906  
0.0845176784130604 0.7503241516948947 0.7569308231455650  
0.5857978607214211 0.7448315066390976 0.7406819862567762  
0.4173571786472060 0.7481621914284442 0.7472110574250349  
0.7573413517565908 0.2458855541668579 0.2495068100193549  
0.9187113848271903 0.7467758154608496 0.7522247496525208  
0.9209705825943663 0.2477599371835221 0.2517191059263348  
0.7525668270346647 0.7445750592734435 0.7492198028550057  
0.6746212136607709 0.2469762355815237 0.1779156580384782  
0.8360038185102834 0.7454517743278041 0.6853914581573015  
0.0012346840348976 0.7476894554679254 0.8201598915050822  
0.8386462952407756 0.2468913531047429 0.3164776035367750  
0.7852716176905458 0.1674962761512059 0.1489707756985377  
0.9497048892313928 0.6685914885991104 0.6514032853573185  
0.8913431572648578 0.3266979294132805 0.1512519106924627  
0.7257073474349136 0.8226042355206843 0.6447450026989887  
0.7791574586969425 0.8259588947824521 0.8506448549753595  
0.9490357059224377 0.3288806411683711 0.3502872866077315  
0.8910203849924756 0.6664169347042594 0.8502575782076015  
0.7290056687396613 0.1656359169053684 0.3468264956849422  
0.8879062086922993 0.8245992635146900 0.8534969486898836  
0.7277295672325406 0.3249566270956270 0.3492903844696216  
0.7823830104809326 0.6661881805250093 0.8497074606817582  
0.9470883469272663 0.1691423122250901 0.3550036833471122  
0.8938651384628663 0.1668357724966043 0.1490619149060419  
0.7241520121950183 0.6645487773590028 0.6510505126680987  
0.7829460262117909 0.3260792598577435 0.1504343960101809  
0.9458456587992408 0.8274930077398357 0.6544303329045963  
0.3373197588856124 0.2562240293228755 0.1904630377164563  
0.5009808505155878 0.7466234376419526 0.6771769462357833  
0.6687908120353591 0.7453376681437404 0.8107936476458250  
0.4204893431346142 0.3145911490919665 0.3354030514570285  
0.4503154043871892 0.1579675235688641 0.1427934241581373  
0.6155030625145279 0.6651907049871492 0.6451211224588553  
0.5662895920014990 0.3296599009734401 0.1387626923786886  
0.3877589892616702 0.8300954634242542 0.6545699151021396  
0.4506669178323310 0.8225785350220479 0.8467901850058914  
0.6190152247694991 0.3229213173378598 0.3557325345454548  
0.5550464717396900 0.6680554279840911 0.8402798470491138  
0.3894194165225355 0.1574867148729126 0.3411615483676602  
0.5593658624714726 0.8247324840302499 0.8389720924642190  
0.3342396623320243 0.4016985528997684 0.2427912855681356  
0.4462112770694384 0.6658021381566798 0.8415490478863052  
0.6210867755281342 0.1554370556995474 0.3324989660486208  
0.5592221434492777 0.1653634739869228 0.1241465119353981  
0.3833420460501605 0.6744078494580433 0.6448161603998828  
0.4584250569663196 0.3198568735161329 0.1206114716113195  
0.6168348235440182 0.8228616377748904 0.6393499592489851  
0.0029507171117374 0.2472202809521507 0.1870432771950609  
0.1671672758443398 0.7522331443697747 0.6939750777933964  
0.3354032075597423 0.7495919024337011 0.8215406106203087  
0.1666749074380954 0.2480055866062444 0.3208784073540429  
0.1148997587082384 0.1700146479467139 0.1553349325846333  
0.2746202577127749 0.6773104373119199 0.6591710172064100  
0.2206634886082440 0.3232570534359389 0.1446008947531655  
0.0543443895581302 0.8295408141666982 0.6582979417705739  
0.1124628664572401 0.8299336423358835 0.8573234672866951  
0.2654557580102722 0.3373188607467152 0.3505380402933651  
0.2217549932103781 0.6719753740402681 0.8620900541514405  
0.0556685245068857 0.1675143077048059 0.3538603351206211  
0.2211176310870273 0.8295226215217655 0.8609248159077466  
0.0574182837413583 0.3273293267661483 0.3535064527158941  
0.1129304227580684 0.6703522276755007 0.8585241772959978  
0.2820521668741424 0.1742029716955040 0.3574292279844947  
0.2234992850535930 0.1667032667915572 0.1617992347863872  
0.0584534762629430 0.6697249274886042 0.6530405270307357  
0.1123065353948785 0.3282070700641772 0.1524123418096644  
0.2792779957352777 0.8337839127283916 0.6650182054835104  
0.5139981091367584 0.2347587228538699 0.2972906736720444  
0.4732910516370525 0.4096138996063826 0.5908334521061724  
0.5217296392411868 0.2349350841848730 0.5348728978181059  
0.4311285841655332 0.3687351709359316 0.5845986855512159  
0.1691083174189993 0.1401979798970358 0.1333148623025236  
0.3272121357858049 0.6493757023106298 0.6249576648108862  
0.1667765457315123 0.3543566248955328 0.1239006106577905  
0.3332318791198103 0.8600502474333412 0.6347151983019031  
0.1665035947815515 0.8577905686666047 0.8843368017474079  
0.0031674479578672 0.3566569334396079 0.3770887380491062

0.1674249103836651 0.6425519956352616 0.8845077520200089  
0.0013829713655805 0.1400771137583516 0.3797760205043092  
0.1684679815409871 0.0676400276746969 0.0686299216558447  
0.3208306449819626 0.5814827161260407 0.5529683674968514  
0.1672647302221826 0.4282445004978003 0.06118265506490999  
0.0002038054973646 0.9295777325841803 0.5657314009756713  
0.1668678250925434 0.9302890755948338 0.9493977707858093  
0.3054796725203857 0.4582587900396652 0.4102998028429246  
0.1674241297101331 0.5684076415707012 0.9467501437549669  
0.0008279138176560 0.0672555175117820 0.4451426877735105  
0.1104340044801943 0.0329143072154646 0.0396915320867498  
0.2657847262473363 0.5362508699714766 0.5582560422813972  
0.2247907901014037 0.4658555604345949 0.0373151001498543  
0.0578984480919164 0.9639036747360250 0.5337736486633615  
0.1096135539403988 0.9655255920279479 0.9810665608804177  
0.2589350381788190 0.4740852346740767 0.4896421341622308  
0.2247650627758074 0.5344533253776402 0.9813054669118029  
0.0581984638501499 0.0312403735170739 0.4747231358466227  
0.2249003731259808 0.9650147572608212 0.97833254174082840  
0.0610998915927943 0.4673321700237496 0.4657428787988379  
0.1099462671707628 0.5306891356233295 0.9708175041274034  
0.2749347500099599 0.0357255988771254 0.4820081486285266  
0.2257185164492300 0.0324146309064856 0.0368809394926880  
0.0615973855497778 0.5348216121303052 0.5245217312084746  
0.1098520829435022 0.4622359591092181 0.0269847635842815  
0.2751376696798077 0.9689478565910049 0.5424424639765338  
0.5051685267108958 0.1343283604424398 0.1089315190082849  
0.6702738768521438 0.6366086015730817 0.6232098568148020  
0.5109263303277121 0.3536553822254395 0.1060736763651682  
0.6717204560176907 0.8506433277314495 0.6168618489219708  
0.5050928313104889 0.8517055278643864 0.8670358019982265  
0.3002105215006209 0.3950788246574418 0.3288633278222910  
0.5012647384211919 0.6387608997728178 0.8652728960241601  
0.3340285505524361 0.1390266597189814 0.3770526986840659  
0.5045928013245483 0.0619311492222370 0.0450591645552344  
0.6712161602494819 0.5636255481218024 0.5588970049763505  
0.5093169180852212 0.4276241513268168 0.0447612981045060  
0.3327801086878376 0.9325296901889523 0.5693763562082401  
0.5051768259253645 0.9245848606339122 0.9298601544859466  
0.6731198233923767 0.4256718005705807 0.4406496039192198  
0.5035520757023706 0.5657487743941367 0.9288052429749477  
0.3325203359724974 0.0682952668041103 0.4462964132402739  
0.4469673799376482 0.0246181591391597 0.0219129638052950  
0.6142813034113069 0.5248874616120014 0.5350353489614647  
0.5655070400558531 0.4648001290981433 0.0123956744407197  
0.3902896209850730 0.9657480423455401 0.5346445620210322  
0.4473518607597502 0.9568182982819301 0.9648295568071378  
0.6152191319666813 0.4572434574692520 0.4769528069067435  
0.5626420728893334 0.5326158001552113 0.9551909549320337  
0.3901811461250208 0.0322772456613968 0.4742359133810980  
0.5626800664461911 0.9622041161317042 0.9527158624221670  
0.3602939694286560 0.5039062893946242 0.4050510979302593  
0.4474054545076511 0.5287167498140791 0.9617276262528262  
0.6173258167499863 0.0276002569519206 0.4637871182749987  
0.5624846153762822 0.0300858929149264 0.0094969152659227  
0.3687917899404680 0.5634059793710897 0.4773563167967415  
0.4501604151182690 0.4608157299213219 0.0187497381996686  
0.6162057853475499 0.9603409158672055 0.5226558331566101  
0.8394296013326107 0.1387444936769497 0.1239392343403602  
0.0043373681297531 0.6409770058527960 0.6270213340462545  
0.8372992997851484 0.3548470734839823 0.1254070596594479  
0.0001821212857953 0.8567927729214921 0.6310395938933996  
0.8337059945569633 0.8535972651389585 0.8768450548895683  
0.6736015910365081 0.3524144503701954 0.3768315068588770  
0.8366134163817950 0.6381485151584659 0.8752317635779512  
0.6757961657559602 0.1325413665448302 0.3653886986662767  
0.8381759360452022 0.0655651632729627 0.0595150466925496  
0.0044775130661454 0.5678985173454323 0.5617880079543254  
0.8369960871879987 0.4276040160485670 0.0604694091665260  
0.6731467951920377 0.9232937223301105 0.5515402107032813  
0.8347288252924376 0.9269815242528383 0.9410871468603867  
0.0035484356113502 0.4297295122397617 0.4418065898500959  
0.8367757282237896 0.5653598029270102 0.9404940108942996  
0.6755745630724579 0.0603515662713598 0.4312266205079327  
0.7798285324239697 0.0330378028633116 0.0268703212473371  
0.9468885524387008 0.5304199609526085 0.5374973335913011  
0.8944734336365158 0.4614819665036566 0.0265401672129351  
0.7313536346802485 0.9563918026707519 0.5196061065776515  
0.7781590658972616 0.9652771187947087 0.9688874329641958  
0.9464047601301013 0.4628976231104750 0.4788372987924185  
0.8943270162067214 0.5288804554742337 0.9677078526807846  
0.7326228697366134 0.0236062041444950 0.4604177630264235  
0.8930614561002125 0.9595622352585740 0.9736598823137976  
0.7301677324828526 0.4643084565193028 0.4645394220458040  
0.7793059036143698 0.5315717505252021 0.9745874666422040  
0.9431589335500130 0.0329475492807237 0.4771931741950571  
0.8947576702252024 0.0273174625704058 0.0316241515993216  
0.7291791685152328 0.5319510695649841 0.5226851339414214  
0.7794548302245270 0.4641747113676580 0.0334065170075338  
0.9428364816252243 0.9656206000278104 0.5362645796635268  
0.0034035604854893 0.2326492407918836 0.1104807105207858  
0.1688920207128227 0.7283338167435349 0.6225240008185060

0.3375448437520410 0.7300743659988342 0.8956778315384827  
0.1670418602029880 0.2753809542227189 0.3897405463956061  
0.0656939467467410 0.0595210940850970 0.0642346932522473  
0.1028753275432796 0.9368807757580144 0.5560749043128443  
0.2169441336898664 0.4380095758759479 0.4962094695330344  
0.2699031589357365 0.5626922631053149 0.9636811331168966  
0.2695937506222187 0.9383279895439588 0.9537225534643906  
0.1059521831014378 0.4431865736071329 0.4367728350500871  
0.0649323457056221 0.5558457323673510 0.9444827179584463  
0.2298696206051692 0.0632485208562482 0.4615053185174299  
0.2710250991341064 0.0588482771445558 0.0586743961160672  
0.1069178109758152 0.5627596290011493 0.5418407913031810  
0.0647639365217730 0.4340785636273268 0.0452953694049914  
0.2302158222725848 0.9439976978400136 0.56966605157184023  
0.2286903737990939 0.55016450114305256 0.6176833906501134  
0.0642908583965962 0.9392817447826775 0.9588595895534718  
0.2697735839296800 0.4410957922843295 0.0645996274769085  
0.1034016233151107 0.0569300258311301 0.4504970739187631  
0.3376780722678020 0.3110604376292357 0.1732876983803630  
0.4997688392036780 0.7465278371316163 0.5977689253541104  
0.6672071572096340 0.7671788463738606 0.8836131045738945  
0.3933137186607265 0.3542570057188503 0.2992862908631669  
0.4020678447212434 0.0494247962827773 0.0492938256885767  
0.4353653174016168 0.9385780879673076 0.5558622415457336  
0.5705927589190256 0.4279716629811609 0.4595985202096430  
0.6064221173603718 0.560915444432343 0.9296233170587557  
0.6075322678497829 0.9375530527568389 0.9247284273805164  
0.3964125660761325 0.4917642986210499 0.3432332408523967  
0.4012608934673773 0.5536878466834398 0.9414955638743490  
0.5727888048097071 0.0560787027684741 0.4429871553324540  
0.6071043787714584 0.0593175687637627 0.0272517212169559  
0.4121194058224344 0.5974376053358070 0.4745875943510990  
0.4062850467792645 0.4327708972304821 0.0443457553346421  
0.5707081760004291 0.9357460821717115 0.5476003133205591  
0.5689013579120816 0.5480204715718668 0.5633426190153440  
0.4027270514092740 0.9277826882934276 0.9463088382025172  
0.6116983633321800 0.4398537166945388 0.0322722569647271  
0.4351697845594860 0.0574627754209477 0.4480332330054616  
0.6734064996325675 0.2839649638093972 0.1189214557886246  
0.8362135056594474 0.7625536335480669 0.6099119468404989  
0.0007747418885118 0.7294698044458718 0.8950870600720829  
0.8388863776595387 0.2291984829678854 0.3916554736305705  
0.7354348077386184 0.0618618932562941 0.0477588331394116  
0.7759548789275283 0.9285920818110901 0.5419948054171292  
0.9011838251555022 0.4348696517320083 0.4610297603958524  
0.9393867432309931 0.5540438973424439 0.9416590562802708  
0.9374458115354015 0.9307759802515740 0.9526225663325406  
0.7754514508528436 0.4406509635468159 0.4366077635008535  
0.7342068831940801 0.5590346335336380 0.9542558377417560  
0.8981287920980224 0.0598628749534986 0.4549918027478274  
0.9405321056790819 0.0513193921920782 0.0563855048736043  
0.7737408245747268 0.5612975776556121 0.5408194999633886  
0.7343559099359269 0.4392355402505447 0.0596897908130020  
0.8975716211382470 0.9402392112736838 0.5608111335737430  
0.9020668000975910 0.5550613226376889 0.5657864294547768  
0.732389998363905 0.9412767346118556 0.9440964972249323  
0.9395882929900430 0.4341538114568989 0.0471469040762477  
0.7782008608926704 0.0481402413687529 0.4357177855577163  
0.5617520255573588 0.262188244838698 0.5430963195331318  
0.5132834047534598 0.2383191799985507 0.4559765692624196  
0.4261022721958654 0.2386984123697166 0.2432668250597729  
0.5891638221458215 0.2431263821797146 0.2404411449335046

Structure TS12 S=4

1.0000000000000000  
20.9172000884999996 0.0000000000000000 0.0000000000000000  
0.0000000000000000 17.8076000213999990 0.0000000000000000  
0.0000000000000000 0.0000000000000000 12.2158002853000003

Al O C H Fe

10 63 97 62 2

Selective dynamics

Direct

0.0855192775449680 0.2486630646135666 0.2541992184145059 F F F  
0.2500221773974545 0.7551352686920296 0.7635117348931786 F F F  
0.2501985453909512 0.2484344327403036 0.2508012445668584 F F F  
0.0842523941048512 0.7505719595635583 0.7566650884101520 F F F  
0.5859065025610022 0.7442474878459677 0.7410222138936220 F F F  
0.4175179369164397 0.7492011350877235 0.7488016341888581 F F F  
0.7576290319757462 0.2459011327831959 0.2495543593035805 F F F  
0.9185900352264795 0.7469099065948299 0.7519145073854929 F F F  
0.9213503934205036 0.2481778959965339 0.2516602855910719 F F F  
0.7525652966548932 0.7443404625673864 0.7493582701373427 F F F  
0.6756188115744379 0.2467640757278957 0.1779544790430592 F F F  
0.8359669412221606 0.7454349845758159 0.6851882793730226 F F F  
0.0010661409435571 0.7477365631406556 0.8197905724014021 F F F  
0.8391681280455927 0.2471329925955104 0.3164995341564207 F F F  
0.7861852840221459 0.1676204821995739 0.1487980963254785 F F F  
0.9498393190357959 0.6688422047458999 0.6509553498640770 F F F  
0.8918841991959496 0.3271220889347433 0.1515951177091708 F F F  
0.7256909292397182 0.8222075513973977 0.6451680754926628 F F F  
0.7792307400529026 0.8259175428126895 0.8508823632223041 F F F  
0.9497589230983934 0.3291064546017495 0.3504755416004599 F F F

0.8911702314995154 0.6664214112273470 0.8498164736307388 F F F  
0.7301907760707138 0.1653060357713869 0.3471537087739662 F F F  
0.8879747346410838 0.8246010498430394 0.8532651376303946 F F F  
0.7279960585666032 0.3248346594757905 0.3498846150787642 F F F  
0.7825503904020152 0.6661155281959239 0.8496291748532983 F F F  
0.9477191620351419 0.1694646427916595 0.3550517529139441 F F F  
0.8947691791406811 0.1669664636249095 0.1489423448325695 F F F  
0.7241536763878358 0.6642780996065056 0.6512852299996794 F F F  
0.7834997132913131 0.3263331471473805 0.1506875722197023 F F F  
0.9457218100634321 0.8277358733794600 0.6539921667814497 F F F  
0.3326511563551406 0.2466720526918635 0.1824581331849302 T T T  
0.5009231243679295 0.7468224119004319 0.6778599383119328 F F F  
0.6688765707009523 0.7447637800310432 0.8112003451496790 F F F  
0.4124098537955732 0.3087487834091078 0.3282672336092105 T T T  
0.4528365194173745 0.1575766298287533 0.1401737219435546 F F F  
0.6155047640476070 0.6649554722817754 0.6453803608302948 F F F  
0.5644100875691507 0.3292758249122798 0.1380520791970028 F F F  
0.3879038679397482 0.8312460237355808 0.6558676690343361 F F F  
0.4512558641486351 0.8227465899231703 0.8481573647418870 F F F  
0.6191953789944336 0.3232980238202927 0.3546080359237038 F F F  
0.5546926411238928 0.6670014854369413 0.8399214141692042 F F F  
0.3899350029349620 0.1554543590479582 0.3359770722286086 F F F  
0.5599858334019956 0.8235868689238259 0.8400295445721113 F F F  
0.3415794901380096 0.4006040265798276 0.2548910493019818 T T T  
0.4458736998651815 0.6661507501986961 0.8421250183469411 F F F  
0.6221781850334125 0.1558220528243055 0.3348533565692975 F F F  
0.5619110620451693 0.1646650877388680 0.1256377423988013 F F F  
0.3828620663192694 0.6759455537846364 0.6465024218289557 F F F  
0.4563376770429528 0.3187311306222753 0.1219094247934365 F F F  
0.6168259645893599 0.8226932710743995 0.6398162970344146 F F F  
0.0033693689745391 0.2481392334116919 0.1872636771591942 F F F  
0.1670540425206397 0.7534137108014534 0.6946000714715836 F F F  
0.3353213363561451 0.7509961335319417 0.8230199085435643 F F F  
0.1680682305593848 0.2485595989218226 0.3190370910865212 F F F  
0.1128844782278975 0.1701789673641301 0.1550499860352588 F F F  
0.2741050255351922 0.6796381245926639 0.6606596250480408 F F F  
0.2219066659475786 0.3248478955449201 0.1451326440923779 F F F  
0.0542066854831731 0.8297250885098322 0.6580918488757703 F F F  
0.1117328131690130 0.8297278592332091 0.8576828149694364 F F F  
0.2667627043718994 0.3389728609111629 0.3533169636260638 T T T  
0.2216835343762042 0.6730252725377994 0.8628793346941919 F F F  
0.0563380090932171 0.1685258113458801 0.3553410060584952 F F F  
0.2204080987932429 0.8301957792053969 0.8621297049787913 F F F  
0.0581951434755652 0.3280206573176869 0.3531708678368801 F F F  
0.1128654915732099 0.6704952198116345 0.8581935290303520 F F F  
0.2830901773495711 0.1754282903866127 0.3570471146372540 F F F  
0.2213524485660443 0.1661943848960945 0.1602375430847118 F F F  
0.0585962087787948 0.6700519867092112 0.6528576549630003 F F F  
0.1134251185883954 0.3286414599490612 0.1522816168212131 F F F  
0.2794267363994152 0.8355486174898132 0.6667336861948954 F F F  
0.5147395909189356 0.2356807518956003 0.2977587442088705 T T T  
0.4634150230701835 0.4019654833865900 0.5815371770355213 T T T  
0.5242838448653302 0.2272553432072115 0.5349832011257192 T T T  
0.4217826663403414 0.3603173938771818 0.5860644025018047 T T T  
0.1668889186856291 0.1399671990071241 0.1326053848325870 F F F  
0.3266309708742483 0.6515800638056177 0.6267910991003518 F F F  
0.1676588743998266 0.3553180467760271 0.1242262867626991 F F F  
0.3334459421074385 0.8614225558782564 0.6359637889527860 F F F  
0.1655190465075691 0.8579837209917187 0.8849967598981863 F F F  
0.0038150409783029 0.3570356406770472 0.3770325634959732 F F F  
0.1674338483145732 0.6432298832173302 0.8846887442790745 F F F  
0.0020021326768429 0.1407065827936549 0.3804093099450654 F F F  
0.1662043519251455 0.067478051949397 0.0682944017166918 F F F  
0.3197671694656989 0.5839984500578979 0.5546856689583990 F F F  
0.1679233064250596 0.4291508233199934 0.0615921534490909 F F F  
0.0002883882895546 0.9298515985159810 0.5655468347979209 F F F  
0.1653986706257697 0.9303518476530499 0.9497360402950932 F F F  
0.3040715346765737 0.4614867486373555 0.4125556976493172 F F F  
0.1676624936073523 0.5691051434536192 0.9469662932110978 F F F  
0.0013527275593859 0.0677306820738082 0.4454439203883354 F F F  
0.1083136028295328 0.0325635119996761 0.0393194685501115 F F F  
0.2646292145835858 0.5389439029993497 0.5606079612522024 F F F  
0.2253529282525406 0.4668472625091127 0.0373535726094403 F F F  
0.0580961988233639 0.9640579343277906 0.5338813861467031 F F F  
0.1078837010556200 0.9651397505264185 0.9808940472936953 F F F  
0.2574252709740321 0.4770896547195562 0.4918248840255117 F F F  
0.2251486295435186 0.5353677404459773 0.9812174953009745 F F F  
0.0586114920958920 0.0314969947735193 0.4750785612295729 F F F  
0.2233022467400545 0.9652956644494282 0.9786724214487990 F F F  
0.0615706683156176 0.4677080122580008 0.4658323714962549 F F F  
0.1102853387246796 0.5313061595766086 0.9713554752606512 F F F  
0.2754444543926198 0.0361168763983031 0.4803469375799807 F F F  
0.2237307783935368 0.0326995879645153 0.0370054885881004 F F F  
0.0619465905457446 0.5351975606366821 0.5245679792208406 F F F  
0.1103871349037675 0.4629147715858153 0.0276481140947951 F F F  
0.2755209096443636 0.9696499790792714 0.5415653790327610 F F F  
0.5077365404838829 0.1339135977013441 0.1084084344271261 F F F  
0.6702716496664394 0.6363603251314487 0.6234528294973174 F F F  
0.5090240651918378 0.3527421270662643 0.1065097866580729 F F F  
0.6717506952091696 0.8504444275927341 0.617365555096502 F F F  
0.5059977012257022 0.8513251649377267 0.8679872245666900 F F F  
0.3013616433816253 0.3962129178727949 0.3363773899830278 T T T

0.5007532577942655 0.6383849971174911 0.8654649381441146 F F F  
0.3347180881292786 0.1390752519500396 0.3747045853031921 F F F  
0.5073551886708998 0.0616709174546912 0.0443304812429659 F F F  
0.6711636852490983 0.5634123267281979 0.5591751211699787 F F F  
0.5070938643987049 0.4268415015436915 0.0450210028470579 F F F  
0.3331163680937550 0.9336168464318533 0.5699051117178442 F F F  
0.5067629213344986 0.9242629519208663 0.9300371281613238 F F F  
0.6730905636523019 0.4255099961031235 0.4408743355565790 F F F  
0.5024563819390551 0.5653149545374916 0.9290807476748881 F F F  
0.3331134748495401 0.0687622487812476 0.4451093203210377 F F F  
0.4494258252697634 0.0247780458814688 0.0219822337518067 F F F  
0.6141990699784969 0.5248394175008002 0.5348814358257528 F F F  
0.5635286885838795 0.4637700306409229 0.0131294380515001 F F F  
0.3906889278512153 0.9669699735564947 0.5357567946844739 F F F  
0.4491922344848120 0.9568970921410980 0.9653218619540667 F F F  
0.6151235580235408 0.4571579087717410 0.4768637166175935 F F F  
0.5612476111616971 0.5316722434025323 0.95603244477808777 F F F  
0.3907124700102926 0.0331439015562296 0.4745000768109264 F F F  
0.5645701481258172 0.9614887678319661 0.9518798977045719 F F F  
0.3590526866103616 0.5070076858295920 0.4067488519972002 F F F  
0.4460501419477580 0.5286280234073715 0.9616138672589258 F F F  
0.6181912292767962 0.0284704113122061 0.4662177101057878 F F F  
0.5649413018707534 0.0294924601388473 0.0083325915323726 F F F  
0.3675513491155158 0.5665071993743780 0.4787393750427924 F F F  
0.4482683168549570 0.4606262024883350 0.0186060991093839 F F F  
0.6167301481783412 0.9611173098131189 0.5248074214631515 F F F  
0.8402811423840717 0.1388495956502709 0.1238653267646654 F F F  
0.0044821269954411 0.6412642479210504 0.6267642821913668 F F F  
0.8377825449496683 0.3551163884050226 0.1256464337537579 F F F  
0.0000714631621292 0.8570270455162898 0.6307357447084172 F F F  
0.8337890401048043 0.8535877782937646 0.8768930255890126 F F F  
0.6737871116062166 0.3523818274248072 0.3766565875986387 F F F  
0.8368077455571949 0.6381130004829245 0.8750025864955759 F F F  
0.6768578495992230 0.1325686090677891 0.3666783565958909 F F F  
0.8389063575559703 0.0655821397058958 0.0595617216647497 F F F  
0.0047474646430814 0.5681691697797930 0.5616597049668286 F F F  
0.8374330667659748 0.4277807143006314 0.0604896156521519 F F F  
0.6734530286781180 0.9231565397289785 0.5523639686140456 F F F  
0.8350023982012829 0.9269503111640489 0.9411900245934532 F F F  
0.0040775537400535 0.4300314942933738 0.4418200827267285 F F F  
0.8370585427492756 0.5653879342909960 0.9402981206290804 F F F  
0.6765619185733911 0.0603501909978661 0.4324962441449074 F F F  
0.7804469302918888 0.0331272654562582 0.0273222016958101 F F F  
0.9472161051508508 0.5305999798627568 0.5373155636601652 F F F  
0.8948765813802879 0.4616574385459629 0.0264144917171549 F F F  
0.7317994847172216 0.9554649909219819 0.5194296441477562 F F F  
0.7785532104991404 0.9653527605996786 0.9693810107492382 F F F  
0.9468572855266402 0.4630606814956550 0.4787128391068407 F F F  
0.8946560802812300 0.5290012995955422 0.9674692995489877 F F F  
0.7333928438155439 0.0227333902184057 0.4604017436291983 F F F  
0.8934449622512801 0.9594313027319998 0.9734328597527906 F F F  
0.7301290893018972 0.4639858512099124 0.4652366292706347 F F F  
0.7796200654843588 0.5315697524250496 0.9744673297330237 F F F  
0.9435764188206690 0.0334940949842206 0.4771138953440683 F F F  
0.8953598044633893 0.0271938139193253 0.0313661668648493 F F F  
0.7291478886446825 0.5315928336698903 0.5234413463093901 F F F  
0.7798438297853565 0.4642251795354895 0.0334016327691629 F F F  
0.9430345890925977 0.9660808417717988 0.5359628871031319 F F F  
0.0039697021374607 0.2295997463884447 0.1125185629692567 F F F  
0.1692278207458884 0.7298277199922367 0.6229764906534427 F F F  
0.3374630010106046 0.7316527721994035 0.8972539363605989 F F F  
0.1687888382935299 0.2714977822893658 0.3912012431968961 F F F  
0.0634688491274815 0.0590089589901908 0.0636423911904345 F F F  
0.1029893232345884 0.9368660881604001 0.5562463801652626 F F F  
0.2156248736276112 0.4407554536993246 0.4987271974812799 F F F  
0.2701867123649890 0.5637065505934444 0.9631935539164544 F F F  
0.2680980650977531 0.9387783256549085 0.9542505055511725 F F F  
0.1064227975538046 0.4435525427221378 0.4368801273433220 F F F  
0.0651993932777515 0.5563634128585946 0.9452014256124315 F F F  
0.2303776183948756 0.0632560676398128 0.4587804501544781 F F F  
0.2688375256481876 0.0594895270694593 0.0590852307141461 F F F  
0.1071915976534399 0.5632743346390257 0.5419818823419433 F F F  
0.0654122198007201 0.4346036267526330 0.0462710648062270 F F F  
0.2305086881706160 0.9446312227893259 0.5682319807261749 F F F  
0.2279235928682368 0.5528272383990256 0.6206883319203982 F F F  
0.0627800750972654 0.9385071145294859 0.9584145931499037 F F F  
0.2704469208670162 0.4421099043827823 0.0641981649486709 F F F  
0.1039086486601022 0.0570697572506802 0.4511021031912961 F F F  
0.3338202231179039 0.2792591849631236 0.118361077783812 T T T  
0.4997281484935385 0.7525603767601154 0.5988876571615194 F F F  
0.6672220873001606 0.7676007486233871 0.8833732758223860 F F F  
0.3771472647369833 0.3533520139533550 0.2754622188136508 T T T  
0.4048394467581531 0.0500354789152908 0.0499732960342243 F F F  
0.4357567498225023 0.9402054694317314 0.5580800943579121 F F F  
0.5704591544681819 0.4279890591871549 0.4591932404491033 F F F  
0.6053046765711372 0.5596373816684377 0.9310480312831970 F F F  
0.6091376586997157 0.9364049076230074 0.9234120181861911 F F F  
0.3954318199590929 0.4938943041631703 0.3459436028849652 F F F  
0.4001045829433210 0.5540084826426792 0.9411118567761463 F F F  
0.5738664412142924 0.0577815233506840 0.4465936092138776 F F F  
0.6097227075337770 0.05883369300215817 0.0255435680321909 F F F  
0.4108000959018483 0.6006547268338736 0.4760972728456281 F F F

0.4041253764436021 0.4330625722661097 0.0439847153208675 F F F  
0.5711324699159093 0.9372126558110452 0.5506252584167015 F F F  
0.5688172938101985 0.5482592207300669 0.5627059988093777 F F F  
0.4043783138254966 0.9280721003729440 0.9474478832425248 F F F  
0.6095145860892899 0.4385065628273068 0.0335305127100014 F F F  
0.4357986437078054 0.0583201828611379 0.4488116188840436 F F F  
0.6746149759223670 0.2816584350304581 0.1164128477509294 F F F  
0.8359986223541469 0.7633331917086110 0.6100968775556268 F F F  
0.0005067457518848 0.7301140374093293 0.8950072593903471 F F F  
0.8393029852865368 0.2279534913593864 0.3909146296470496 F F F  
0.7361389442104311 0.0620254460483380 0.0485234498448719 F F F  
0.7762487330623955 0.9269936545671982 0.5408719419490211 F F F  
0.9017029197621156 0.4349176203443861 0.4607980014768245 F F F  
0.939668733227476 0.5542145943359174 0.9412780379760548 F F F  
0.9377457789499815 0.9305594815194951 0.9521418330221678 F F F  
0.7754121140631867 0.4401779422839240 0.4375819504672549 F F F  
0.7344977299702649 0.5589714354663897 0.9541077105688345 F F F  
0.8986263623606163 0.0605529259671513 0.4548235236425242 F F F  
0.9412200835018609 0.0510958584664891 0.0558567393762317 F F F  
0.7737103612739062 0.5608172229401305 0.5419738845495559 F F F  
0.7347863229384757 0.4392175782442536 0.0597640120723142 F F F  
0.8976809755815793 0.9408070904780033 0.5602615641743611 F F F  
0.9023495442253662 0.5551901509708870 0.565483332545905 F F F  
0.7326879749466713 0.9414410644598092 0.9449374063091867 F F F  
0.9400015824603614 0.4343428282081447 0.0469999567403292 F F F  
0.7790475424833758 0.0466303067182281 0.4347920289857043 F F F  
0.5622835652402571 0.2580549574735045 0.5446726482147426 T T T  
0.5165225105466149 0.2302586580231321 0.4557788127275160 T T T  
0.4266574402837762 0.2370391219686567 0.2403270113063899 T T T  
0.5897859679564164 0.2428857048399919 0.2412841211056076 F F F

Structure 11 S=4

1.0000000000000000  
20.9172000884999996 0.0000000000000000 0.0000000000000000  
0.0000000000000000 17.8076000213999990 0.0000000000000000  
0.0000000000000000 0.0000000000000000 12.2158002853000003

Al O C H Fe  
10 63 97 62 2

Direct

0.0842467339354494 0.2487979608926005 0.2545075411939355  
0.2505244383024017 0.7545037429259457 0.7607166416376239  
0.2475684145416146 0.2495010652308853 0.2544047356520387  
0.0844871607443366 0.7511901366113738 0.7561865911785085  
0.5859752193451867 0.7444676558138831 0.7413507951910595  
0.4179179719210427 0.7492272146885183 0.7472967209091540  
0.7579297904714917 0.2458953847427162 0.2494282812255576  
0.9186462577743477 0.7471129721216936 0.7520461579032278  
0.9209818644664232 0.2480445812309159 0.2512872023895139  
0.7525835841580805 0.7442677678425197 0.7495178653367677  
0.6768613228814240 0.2466764369144901 0.1774541507463042  
0.8360934349739714 0.7454763224899731 0.6852727720357404  
0.0013485415370991 0.7483018205075863 0.8196781018564158  
0.8394182855668261 0.2471515652349212 0.3162135723384338  
0.7866137510828234 0.1674726106028563 0.1485469662051247  
0.9499755948446794 0.6690985814347736 0.6511385483318163  
0.8924810204299858 0.3270021825428224 0.1509222531022588  
0.7257720487542931 0.8218466908612045 0.6455342188049028  
0.7792964415502762 0.8257878406264479 0.8510156763630736  
0.9491898855264882 0.3294409955104056 0.3504119717724177  
0.8914258685452793 0.6666179974524240 0.8498732715272880  
0.7315682178137116 0.1651345929628573 0.3477817409671228  
0.8880503864212171 0.8246171726385163 0.8531501039609161  
0.7291867277283215 0.3250486057652930 0.3500008253826066  
0.7827907781777910 0.6661712623142514 0.8497571276033281  
0.9475575143932536 0.1695878278123539 0.3553462477462798  
0.8951353126025289 0.1667055721840490 0.1488248180132573  
0.7243396212961517 0.6642594654764412 0.6516569805316424  
0.7841458231279052 0.3264129051891880 0.1502946691719289  
0.9459061874066661 0.8278638722398693 0.6539908050252454  
0.3303949183133236 0.2618758659655575 0.1866954657029244  
0.5011998355890902 0.7470984124469991 0.6773221286356390  
0.6688352448663152 0.7447177213481272 0.8115947884217898  
0.4134482544981447 0.3010324478962734 0.3509936818851254  
0.4529899079584529 0.1623314731887023 0.1384937404824018  
0.6157007997672900 0.6650099752695571 0.6454229277001019  
0.5646211287065005 0.3301612152177048 0.1402944418077341  
0.3882244836462651 0.8315145545258247 0.6543908391769839  
0.4509774140529971 0.8232077839217771 0.8476013414176287  
0.6204518603951357 0.3231663169824111 0.3550169838279557  
0.5545398752037125 0.6668883631385618 0.8396051454519510  
0.3886120232210170 0.1549070842570033 0.3312954696626341  
0.5596867795947769 0.8240062596936818 0.8406241140814350  
0.3339644592872228 0.4003907291511135 0.2430194626168537  
0.4457540092018520 0.6658901996970757 0.8406669559070413  
0.6238137454066865 0.1546246631374351 0.3338660778169522  
0.5621957068751551 0.1655351305966111 0.1262859798412792  
0.3836535881695888 0.6757256768221911 0.6433229783265894  
0.4558012446018809 0.3249925686999481 0.1392009253873890  
0.6169147053840062 0.8227362827500997 0.6402197755458554  
0.0029702541412491 0.2474441738019757 0.1872413620312913  
0.1673907470741071 0.7532466808997625 0.6932739932880713  
0.3354774818219036 0.7502711627617213 0.8203813266403703

0.1662668872797245 0.2486567599799975 0.3208304118165487  
0.1142118221822951 0.1707233131244235 0.1549223881915360  
0.2748930161212076 0.6780551389658793 0.6570575328632180  
0.2188004003399754 0.3271440027497833 0.1493081665696381  
0.0544148787500461 0.8300344905560001 0.6578790770509596  
0.1125403268666747 0.8307028508120978 0.8568361116665317  
0.2682353365737855 0.3358502314494589 0.3554394621339123  
0.2219087643782312 0.6725731554786506 0.8606640670927915  
0.0561070751257395 0.1681576499749358 0.3544628479299458  
0.2212200183003263 0.8302975384494663 0.8604110249798297  
0.0575028401014391 0.3276732715430043 0.3543133981519790  
0.1130366856737176 0.6716883756002464 0.8577964501321709  
0.2821758623430245 0.1761189651176830 0.3569459095613631  
0.2227029233377981 0.1687149005366111 0.1586969840470457  
0.0587335760218504 0.6703677172021254 0.6526242396200335  
0.1105481250696605 0.3296213902104723 0.1526559574205237  
0.2797203822957486 0.8350236777736609 0.6641939724776945  
0.5171525515645738 0.2350367713589945 0.3018150641168998  
0.4468793463122911 0.3786406910951029 0.5796436375855309  
0.5297832691749926 0.2190197109274217 0.5352263362508822  
0.4056796135724252 0.3363215480737661 0.5780198716392407  
0.1682468071780185 0.1412000164511470 0.1317459233216509  
0.3277384441888098 0.6505881395892191 0.6231519301671906  
0.1647799160503914 0.3569982443506375 0.1259657448803470  
0.3337390901575289 0.8615150806984055 0.6342562082689199  
0.1665606936233882 0.8584547243389097 0.8839112727661240  
0.0031499191492817 0.3571319045310855 0.3775757577854930  
0.1674393781308996 0.6436900552078662 0.8834853642839466  
0.0017152958644315 0.1405533562084409 0.3801938790240955  
0.1679376222007571 0.0684564327397876 0.0678497806610336  
0.3219702287192426 0.5822280736171259 0.5511050653019969  
0.1656257587539417 0.4303860676065724 0.0623122914459232  
0.0002961861275484 0.9299811251174013 0.5654779385707033  
0.1667854567509982 0.9309116804193920 0.9492115794909964  
0.3083463405893357 0.4573196606600552 0.4115073050519406  
0.1669463043611223 0.5697483340573993 0.9461888819228707  
0.0011870763160857 0.0676943773322430 0.4452896391883471  
0.1100084889185572 0.0334785353595179 0.0390157783109768  
0.2673984533876567 0.5362799469987527 0.5573450304452779  
0.2234556038979919 0.4671739584400446 0.0376686481620572  
0.0580792625203012 0.9641941054373646 0.5337324013429630  
0.1094093688727465 0.9659823096068093 0.9806862379801417  
0.2612888088868317 0.4733853748761260 0.4901008412112506  
0.2240522479858376 0.5354002295949355 0.9808511734374533  
0.0585045630413230 0.0315743206660542 0.4748427703442952  
0.2247196810768118 0.9657245907124680 0.9783835353866247  
0.0612592060778694 0.4676743402644673 0.4661212478713744  
0.1091768137379739 0.5327522081285920 0.9705471317417667  
0.2752787599725645 0.0365439111820859 0.4795348103789059  
0.2253255446688605 0.0332151415072402 0.0367137286925575  
0.0618170963713235 0.5352189303357291 0.5247158677076663  
0.1085051730484168 0.4646366729279445 0.0275430004354534  
0.2755515250505127 0.9700591884477330 0.5407616104156812  
0.5071889073694594 0.1363494283547907 0.1083851839041742  
0.6704573516476076 0.6363989962504620 0.6235779830810760  
0.5089904839699859 0.3554938572063763 0.1147174139405406  
0.6719068787581007 0.8502810944030331 0.6176667400084379  
0.5056718113140561 0.8519130878888594 0.8682181393489596  
0.3020138747242492 0.3929853112367633 0.3345440694219439  
0.5005964628579649 0.6381791070592522 0.86479635699021754  
0.3340109963326427 0.1394826302302324 0.3727785617081936  
0.5067390364560127 0.0632787414491143 0.0448781626887427  
0.6715465846793294 0.5634972254300600 0.5592090822230574  
0.5067983923968552 0.4282300707483114 0.0492641923295477  
0.3332357145377445 0.9340929476439001 0.5688687419054749  
0.5062897803287583 0.9249849787534377 0.9305512443697656  
0.6739521649225630 0.4255159873920185 0.4411271642798299  
0.5021837874685361 0.5653520137796314 0.9291777963717699  
0.3327893475096266 0.0693801233320246 0.4438527471219110  
0.4490156331843060 0.0258940301156207 0.0225775296261472  
0.6146996912158346 0.5247521672824751 0.5346629078163172  
0.5631837084278410 0.4645678995499197 0.0156563126692219  
0.3906719835706365 0.9678844955139838 0.5348461526477923  
0.4488053125634935 0.9578295461656856 0.9660531203173958  
0.6158440969758163 0.4569893382537891 0.4768500942884741  
0.5609293686799940 0.5318009698538202 0.9567825686436159  
0.3904921326907152 0.0340740706481307 0.4735208851585607  
0.5639724906079562 0.9624777270561898 0.9527195691168598  
0.3628649421287742 0.5033393880955946 0.4051575248530977  
0.4458069065481537 0.5288581117830576 0.9623795798050407  
0.6192733897219315 0.0283257667935832 0.4659813254164774  
0.5642365622615687 0.0306608263132908 0.0089913976259908  
0.3702231469851956 0.5640292559842962 0.4759755119253882  
0.4480590767427104 0.4616618053407999 0.0214358136341620  
0.6173942325447231 0.9610185614304834 0.5245934261650574  
0.8406016055525544 0.1386248367854106 0.1236905748529983  
0.0045875682581349 0.6415414197157255 0.6268056906742316  
0.8383383684244470 0.3551367451802616 0.1251771266101345  
0.0001807946293382 0.8572095281548886 0.6306599251223236  
0.8338265302061494 0.8535208411714202 0.8768954307032346  
0.6748949804674811 0.3523731105669619 0.3769140182431187  
0.8370667164881179 0.6382400685773804 0.8750597714904187



0.6783326026020211 0.1319200495297422 0.3666964590704345  
 0.8391911531132735 0.0653799448721791 0.0594409965988538  
 0.0047092989963090 0.5683841491606251 0.5618399420937529  
 0.8379863986675327 0.4278584440622276 0.0601955011121441  
 0.6739269304233687 0.9228343272996263 0.5525911326187708  
 0.8350841172664081 0.9268295134639615 0.9411552386974557  
 0.0036582900818152 0.4301689139048153 0.4422191676484828  
 0.8374077998518880 0.5655124417443135 0.940254431313025  
 0.6778646273011009 0.0598354892132378 0.4326695510589952  
 0.7806681907020184 0.0330534363890827 0.0272928079046898  
 0.9470814907901223 0.5309736633879029 0.5376589709239329  
 0.8953777599728068 0.4618438782683558 0.0261499310956116  
 0.7324882725293127 0.9548188602075687 0.5201249405706939  
 0.7786708491607387 0.9652845738808644 0.9693658284089804  
 0.9465305259298961 0.4634061844740096 0.4791261949886558  
 0.8950599709807775 0.5292191879159520 0.9673154786396930  
 0.7344889836358487 0.0220230649669018 0.4610376905981963  
 0.8935872379749228 0.9591906606703906 0.9733130917484898  
 0.7308446906235722 0.4642094521998662 0.4655892874943164  
 0.7800112581514334 0.5315986238086657 0.9744169287514728  
 0.9434340165514835 0.0334743813751066 0.4770876955126470  
 0.8956020689880791 0.0269344051400489 0.0312248005282562  
 0.7296471363142425 0.5318374286099783 0.5237358278457854  
 0.7803373016233488 0.4642173897430772 0.0332503193183201  
 0.9429822744250248 0.9660972904998670 0.5359953704194190  
 0.0033561654745138 0.2316121065465375 0.1112193000620831  
 0.1689351647882952 0.7300187125546610 0.6213445058901028  
 0.3375852284821524 0.7313498112218648 0.8948510572126440  
 0.1660960376385482 0.2689861792319883 0.3945978707035296  
 0.0651955579353518 0.0599930143107166 0.0633906398984679  
 0.1029900872654129 0.9370478667802886 0.5560899798593942  
 0.2195275414831804 0.4369717409631015 0.4969558483853014  
 0.2694092306443528 0.5629967309993824 0.9626888569285023  
 0.2695123032434653 0.9390874981470515 0.9541877212921616  
 0.1060710744033931 0.4433673535388365 0.4372183706299618  
 0.0643864006227193 0.5582228311753851 0.9437968833948411  
 0.2301103278280595 0.0635386747720463 0.4582422568857901  
 0.2706428818229963 0.0594493273548279 0.0589123751810730  
 0.1071263411599561 0.5631940209758329 0.5420247058509778  
 0.0632375002811562 0.4369410005256993 0.0460695571221786  
 0.2305837260960314 0.9449750184204460 0.5674898355569578  
 0.2300668430262434 0.5503171801342610 0.6162690575108841  
 0.0641599908820706 0.9395699081302611 0.9585089465449430  
 0.2683245036067212 0.4420556588422842 0.0645959760531424  
 0.1037684225729617 0.0571708748149816 0.4507390044171160  
 0.3297142603576246 0.2510133505359622 0.1084922317006985  
 0.5003456950864242 0.7536017035108848 0.5984673064327943  
 0.6671968775495158 0.7675996852161757 0.8837500363653279  
 0.3349837599613864 0.3474985637570064 0.2057993531292485  
 0.4043249647950042 0.0508963736806747 0.0506408665753103  
 0.4358675595303014 0.9414275962002263 0.5572250299260455  
 0.5712726943759020 0.4276007214329097 0.4589272682203229  
 0.6050250436997641 0.5593795910726727 0.9310969752454659  
 0.6086698237515021 0.9375263776897533 0.9245537050439657  
 0.3998137699249837 0.4900002946258316 0.3453346217810508  
 0.3998192789258178 0.5538244320397913 0.9410308632953107  
 0.5751712266452560 0.0580072518355988 0.4461466564545364  
 0.6090888737148658 0.0596068967050918 0.0260424246968392  
 0.4131780359377812 0.5986904870629179 0.4728461606531846  
 0.4038966749362541 0.4343957446653093 0.0473154963406081  
 0.5716449256276021 0.9373805804481395 0.5501299738073363  
 0.5692483037173985 0.5481836723436143 0.5621572609401624  
 0.4039425595430471 0.9290160305328562 0.9484012957995557  
 0.6091681904175046 0.4394787215298516 0.0365212608815433  
 0.4355424079066009 0.0594512523609100 0.4480127832030851  
 0.6758198736825023 0.2808821201935874 0.1151948533320622  
 0.8359957798730973 0.7632894485830002 0.6101418484744925  
 0.0008684947101712 0.7301967500542577 0.8946574227247970  
 0.8393532860657619 0.2279882358177552 0.3906204161374184  
 0.7364168944458535 0.0620475019324932 0.0485483668534593  
 0.7767506005752891 0.9261202249210201 0.5420424187676810  
 0.9013040057570736 0.4354044439956170 0.4613032589479055  
 0.9400182200796208 0.5545528956122259 0.9411016150381278  
 0.9378240656338641 0.9302055068158498 0.9519473599069355  
 0.7761880892037287 0.4405004588131604 0.4380439906176562  
 0.7348518891278946 0.5589346420631125 0.9541263843291032  
 0.8984646121600685 0.0604982767523855 0.4548465614371412  
 0.9414888596148632 0.0507911312364201 0.0556906124580739  
 0.7741235748587720 0.5611956942411233 0.5424019151604585  
 0.7353326889152970 0.4390903346778111 0.0596253724458950  
 0.8976715939403102 0.9407741960724900 0.5604051502972897  
 0.9022901401496549 0.5557135403671838 0.5658875304465699  
 0.7327709969454730 0.9414533896655921 0.9449592811239955  
 0.9405307482084307 0.4345761973894738 0.0466885795571597  
 0.7802742608047611 0.0457346051512866 0.4357444907141045  
 0.5613955670544164 0.2576511287613220 0.5506197945492448  
 0.5220081622176993 0.2250281183126457 0.4562824300903568  
 0.4293445769397656 0.2405311163019727 0.2526198366111430  
 0.5912580725961639 0.2422532777410841 0.2425090738816876

Structure TS13 S=4  
 1.000000000000000

20.9172000884999996 0.0000000000000000 0.0000000000000000  
0.0000000000000000 17.8076000213999990 0.0000000000000000  
0.0000000000000000 0.0000000000000000 12.2158002853000003  
Al O C H Fe  
10 63 97 62 2  
Selective dynamics  
Direct  
0.0840255805599170 0.2488649378786789 0.2542512714860052 F F F  
0.2507078847224591 0.7539608659961843 0.7601221078887050 F F F  
0.2472451679512986 0.2492639799593661 0.2545713575894410 F F F  
0.0846499212107261 0.7511722638685114 0.7555571799777638 F F F  
0.5860644814885134 0.7447192303527714 0.7423195255952919 F F F  
0.4180849254582739 0.7493216372893130 0.7475097282888257 F F F  
0.7579938867147931 0.2460490273986338 0.2497010760600702 F F F  
0.9188020343000431 0.7471719468014797 0.7520502527497754 F F F  
0.9208981817000321 0.2481770594102102 0.2514414971661978 F F F  
0.7527302638507223 0.7442501830514914 0.7501392783028109 F F F  
0.6769110936320430 0.2466659357862255 0.1782047848443753 F F F  
0.8361988158921960 0.7454971021408028 0.6856019561010385 F F F  
0.0015391077548585 0.7484242541952497 0.8193281153537839 F F F  
0.8393904520924380 0.2472447109459566 0.3164846491428506 F F F  
0.7865944088499148 0.1676969225308795 0.1483890551405054 F F F  
0.9500348425726699 0.6691926999021831 0.6510080264622076 F F F  
0.8923829275065032 0.3269642990419470 0.1509752278995862 F F F  
0.7258901210859676 0.8216745917387982 0.6460388759218745 F F F  
0.7794907217478766 0.8257989477493837 0.8514082027792540 F F F  
0.9489811253981841 0.3296173634925950 0.3503170571074605 F F F  
0.8916700637797632 0.6666090293779305 0.8499647896220850 F F F  
0.7321199101290148 0.1649409084562095 0.3480634111997531 F F F  
0.8882508942498362 0.8246870198862695 0.8533056080364432 F F F  
0.7290161978795169 0.3250478337602658 0.3505719507273923 F F F  
0.7830325581262159 0.6663015438185482 0.8502966127341978 F F F  
0.9474876706215554 0.1697956186913743 0.3556122463031812 F F F  
0.8951085797858411 0.1667219044915456 0.1491005629448168 F F F  
0.7244741445084628 0.6642128179351943 0.6525174578152075 F F F  
0.7840577312914689 0.3266201384633192 0.1507042773586491 F F F  
0.9459675316150893 0.8279660700943836 0.6539365588967243 F F F  
0.3303714367057572 0.2621952913492455 0.1878544985548974 T T T  
0.5014505631572064 0.7474013138886022 0.6779304688665277 F F F  
0.6689527134474602 0.7449296867280353 0.8124306649276321 F F F  
0.4113482105236971 0.3005635965939789 0.3625653063173673 T T T  
0.4538744104889219 0.1650405391350418 0.1369853412214113 F F F  
0.6158403453410131 0.6651362244824170 0.6464001214957804 F F F  
0.5637213811240400 0.3304467740061483 0.1412519903940250 F F F  
0.3885030900037023 0.8313325699061949 0.6544724436896061 F F F  
0.4509426880644369 0.8237511497101551 0.8481987951848495 F F F  
0.6202637639223099 0.3237190868786257 0.3549334263150641 F F F  
0.5545631689650321 0.6670867258150039 0.8402889961712603 F F F  
0.3870516317183288 0.1535353096760872 0.3302930545589007 F F F  
0.5596835638174156 0.8243960795181593 0.8417206568365145 F F F  
0.3331599974742698 0.4008652139725734 0.2405948228268402 T T T  
0.4458046401061608 0.6662156629246923 0.8408980915387119 F F F  
0.6242337834194132 0.1554597133535651 0.3367369310084527 F F F  
0.5629612509409583 0.1656151800447958 0.1283998145792111 F F F  
0.3840967925560648 0.6755438341640456 0.6430822742729916 F F F  
0.4548841729746727 0.3293943860278148 0.1490891791567179 F F F  
0.6170253951541440 0.8229356987314631 0.6411143614070127 F F F  
0.0027722939034902 0.2474437024901377 0.1871826988679999 F F F  
0.1675688257857857 0.7528912021553182 0.6925897087198081 F F F  
0.3355906209542852 0.7500080045114146 0.8201715512489400 F F F  
0.1659576143481729 0.2485227292845025 0.3205010106665540 F F F  
0.1140649501841224 0.1708007039587756 0.1541934761933135 F F F  
0.2753165454424220 0.6774167317559048 0.6567087124618780 F F F  
0.2183107237262192 0.3270477610698137 0.1490930156278552 F F F  
0.0544974991115410 0.8299533382292026 0.6571962969024625 F F F  
0.1127431350978583 0.8307354628849950 0.8558822352943380 F F F  
0.2680481356619658 0.3363750641543564 0.3543291899847679 T T T  
0.2219306905028944 0.6722986535184532 0.8601475969524515 F F F  
0.0560302343035630 0.1681460340832643 0.3542007585427527 F F F  
0.2214124772412305 0.8301407748690153 0.8596233029845237 F F F  
0.0572702531595937 0.3275411976453952 0.3545212367978294 F F F  
0.1130593067575134 0.6718218827641849 0.8574378764620434 F F F  
0.2809431238793749 0.1754882492886267 0.3571448589095709 F F F  
0.2225728433925269 0.1689366766267639 0.1577430453032420 F F F  
0.0587922023321568 0.6704170317580065 0.6522205641537084 F F F  
0.1100857317873363 0.3298263291942263 0.1529170043336663 F F F  
0.2799541432286148 0.8340540219652084 0.6635412343107916 F F F  
0.5174811391370550 0.2351969041608400 0.3036086903134061 T T T  
0.4432704395728495 0.3648883197598120 0.5393454845932093 T T T  
0.5259908870557394 0.2059708350869312 0.5319970942005489 T T T  
0.4161358688789591 0.3123389149214307 0.5073340536090530 T T T  
0.1680973794739558 0.1413466843015669 0.1308642474979962 F F F  
0.3282773746937622 0.6502709782122338 0.6226381430645347 F F F  
0.1643238595702172 0.3571097892417257 0.1260783541008692 F F F  
0.3338916626656783 0.8609371789199827 0.6339751022559312 F F F  
0.1668076847293349 0.8584207814900608 0.8829973076023165 F F F  
0.0029915177031086 0.3571546907588754 0.3776365092503937 F F F  
0.1673974134670715 0.6436834581492690 0.8831999795162346 F F F  
0.0016568342777958 0.1406630090885628 0.3802242538626430 F F F  
0.1678599403070038 0.0685728048791319 0.0668927483713446 F F F  
0.3225715412702357 0.5821106251996753 0.5500504949467881 F F F  
0.1651531610057475 0.4305984146835584 0.0625963309328270 F F F

0.0003091037307712 0.9300738719290891 0.5653408491079830 F F F  
0.1669613236338705 0.9309404167827680 0.9482268966708887 F F F  
0.3084866786738374 0.4577450877813689 0.4095945178167568 F F F  
0.1667142445310930 0.5698999708245651 0.9462607504028853 F F F  
0.0011386905265240 0.0678375670899882 0.4453391760907124 F F F  
0.1099950722924703 0.0335277205628586 0.0377636101753467 F F F  
0.2680075040726848 0.5361556040180702 0.5563392403509440 F F F  
0.2230259895381863 0.4671482292382407 0.0376009663029890 F F F  
0.0580758391230276 0.9643111920667380 0.5335921181521144 F F F  
0.1095346180850925 0.9660136849145502 0.9794401579923218 F F F  
0.2616777853400976 0.4735436477071389 0.4886757943843705 F F F  
0.2237596354890528 0.5353273534141607 0.9807040301167262 F F F  
0.0584763455220312 0.0317200197815950 0.4747845317684991 F F F  
0.2248253826349185 0.9658077710256308 0.9776805424906598 F F F  
0.0611920689868128 0.4675960438806612 0.4662037221309348 F F F  
0.1088612959067348 0.5332436219718559 0.9711315558123985 F F F  
0.2743814632438770 0.0351604543040835 0.4792231470917940 F F F  
0.2252888593518207 0.0333154190761107 0.0360058304171602 F F F  
0.0617932160541343 0.5351815776370472 0.5246963821384014 F F F  
0.1080582145431990 0.4651599867021119 0.0282457223076591 F F F  
0.2750896121979167 0.9686909148133296 0.5403875579388426 F F F  
0.5075995008743561 0.1373531624712641 0.1087463190662987 F F F  
0.6705422208346477 0.6364731950111064 0.6244342707541222 F F F  
0.5082326415404097 0.3575184519835872 0.1194945648837873 F F F  
0.6720742440574838 0.8502819495791272 0.6183638859009832 F F F  
0.5056062188184143 0.8524218417347029 0.8690469422570786 F F F  
0.3016991941685706 0.3935019138628766 0.3326348057134346 T T T  
0.5005540245805591 0.6384857651224394 0.8654265979102362 F F F  
0.3328630018681622 0.1384052768396771 0.3724907595863485 F F F  
0.5070456830892667 0.0641170745249653 0.0456619543122443 F F F  
0.6715681950056336 0.5636315382392709 0.5598807025103696 F F F  
0.5060798834196447 0.4296206186235665 0.0525447309438505 F F F  
0.3330307942551229 0.9334072820442501 0.5687054391076103 F F F  
0.5062959416515511 0.9256230490473882 0.9313430589629803 F F F  
0.6738797781295816 0.4257387263535719 0.4415129703875067 F F F  
0.5019221014714006 0.5658929725322039 0.9303497906093554 F F F  
0.3316636559707717 0.0685458180747460 0.4438327583492168 F F F  
0.4492698105305948 0.0267662826539166 0.0235591937767410 F F F  
0.6146721571001450 0.5251198902744960 0.5348900858861541 F F F  
0.5625685859834348 0.4653532945620569 0.0180897009914815 F F F  
0.3902829647177271 0.9677768246316134 0.5350356508226852 F F F  
0.4489097727648925 0.9586241013234869 0.9671246032466456 F F F  
0.6157778075505576 0.4574067525155741 0.4769407548999212 F F F  
0.5605452591391611 0.5322044024948553 0.9583047118177461 F F F  
0.3896359070252160 0.0339135146368363 0.4736958641376603 F F F  
0.5640164607584381 0.9631244663370566 0.9532981145034185 F F F  
0.3630583032626333 0.5036902941477805 0.4031694615592087 F F F  
0.4454167301875045 0.5298304218857623 0.9639513119716767 F F F  
0.6197742580744787 0.0289277675907726 0.4680623930275090 F F F  
0.5644229352351857 0.0313254667338541 0.0095452218077696 F F F  
0.3706495356318413 0.5641196023026041 0.4744446914215885 F F F  
0.4474402009426441 0.4631027857766270 0.0241783027680071 F F F  
0.6177935460047905 0.9615492274173931 0.5264439607247127 F F F  
0.8405795302033212 0.1387341069566261 0.1237506398172172 F F F  
0.0046136108334522 0.6416111556180368 0.6265580675912616 F F F  
0.8382683816855021 0.3552012118221270 0.1253392094579127 F F F  
0.0002315150868171 0.8572381748239124 0.6303630785096388 F F F  
0.8340344684852994 0.8535656533519784 0.8771412719493270 F F F  
0.6747737524955753 0.3526265778964941 0.3771987544779378 F F F  
0.8373250439335891 0.6382837984171772 0.8753187771158863 F F F  
0.6788493783013649 0.1321502730573414 0.3681611827730862 F F F  
0.8392165495374044 0.0654776838993172 0.0595388140898621 F F F  
0.0046952724084193 0.5684477361839555 0.5616678709493854 F F F  
0.8379959079163228 0.4278579978138097 0.0602573750734763 F F F  
0.6742257859939400 0.9228248469451685 0.5533447153644033 F F F  
0.8352522535426630 0.9268957144107333 0.9413385977837478 F F F  
0.0035487144199706 0.4301899282348742 0.4422530194057686 F F F  
0.8376186122432046 0.5655121915397885 0.9403898006860771 F F F  
0.6783719561875259 0.0599563058068284 0.4338431886309095 F F F  
0.7807277808300057 0.0330346164776572 0.0274846938357243 F F F  
0.9470352440965755 0.5311222950573722 0.5374702212163101 F F F  
0.8954434249722141 0.4617377518591610 0.0262543237435651 F F F  
0.7328144094210742 0.9542921453300934 0.5199401254369889 F F F  
0.7787989643611013 0.9652484200247002 0.9696046858153977 F F F  
0.9464394667729934 0.4635292684080383 0.4790259690640468 F F F  
0.8952262599258276 0.5291247671311226 0.9674473647978985 F F F  
0.7349142035364480 0.0215628745167322 0.4610179056405954 F F F  
0.8937270902686123 0.9593686276473292 0.9733922715530952 F F F  
0.7308055042957022 0.4642337892383495 0.4663676927420042 F F F  
0.7801702206589596 0.5316684656594575 0.9744391746858554 F F F  
0.9434018160839557 0.0336244257399017 0.4772087209694149 F F F  
0.8956727221938152 0.0271296057781925 0.0312759752632417 F F F  
0.7296516715210686 0.5318126040304421 0.5246447387731408 F F F  
0.7803925899508997 0.4642811542544152 0.0332393860045670 F F F  
0.9429762903062979 0.9662152236150092 0.5360253408838176 F F F  
0.0030653099361544 0.2314004469965454 0.111255532629997 F F F  
0.1690502644236815 0.7299888387396436 0.6204435677641200 F F F  
0.3376507694756512 0.7308945407269860 0.8945379665814599 F F F  
0.1656860948558787 0.2661746287799431 0.3957066535474638 F F F  
0.0651053676540201 0.0599697975108597 0.0618826703403386 F F F  
0.1029984166372842 0.9371610945466955 0.5558703514227403 F F F  
0.2199413254227238 0.4370783763474506 0.4954618359175313 F F F

0.2691734258596341 0.5626948683938551 0.9622434135664690 F F F  
0.2696803828823064 0.9392021866725031 0.9537512912977846 F F F  
0.1059841133174402 0.4431716023048153 0.4374284596564735 F F F  
0.0641083154269282 0.5589428784570316 0.9446522720603170 F F F  
0.2290588852099162 0.0616887061739746 0.4576067211486077 F F F  
0.2705690136202747 0.0595433574623598 0.0584499063169872 F F F  
0.1071213493674037 0.5631000804789892 0.5420548316043892 F F F  
0.0627097149878679 0.4377678699758221 0.0471174521327811 F F F  
0.2303163604780707 0.9430489694112936 0.5669264726362044 F F F  
0.2308432328393053 0.5499799616569803 0.6156612331858256 F F F  
0.0643328186026366 0.9395620677315719 0.9570604053251444 F F F  
0.2678570906018152 0.4418350639518778 0.0643124620412721 F F F  
0.1037225751229727 0.0573330120800009 0.4506391252510795 F F F  
0.3305120648960372 0.2488261351212979 0.1105094313647858 T T T  
0.5007916476859577 0.7574315056561431 0.5998380617538359 F F F  
0.6674169336507987 0.7680769923240192 0.8844066082360982 F F F  
0.3339128053160579 0.3479876511935063 0.2033901757234743 T T T  
0.4046286206659815 0.0518456769801361 0.0517607091000869 F F F  
0.4356470383329523 0.9418405445004510 0.5576912124883435 F F F  
0.5711584146033672 0.4282211119956614 0.4586375079020470 F F F  
0.6047351753298500 0.5593917691604844 0.9321961849713958 F F F  
0.6086765842931570 0.9381580351668646 0.9249821598904333 F F F  
0.3998711439560267 0.4904975526377129 0.3430227124821172 F F F  
0.3995144776254946 0.5547776356898879 0.9420461921979708 F F F  
0.5757401909417652 0.0590319652365565 0.4492073276775699 F F F  
0.6093491454679665 0.0601939023285212 0.0263578041479988 F F F  
0.4136720940603595 0.5986669287727011 0.4712997941436257 F F F  
0.4031643120105386 0.4363067208819587 0.0505131870640767 F F F  
0.5720390327003528 0.9383020456265712 0.5527099715158741 F F F  
0.5692266573394491 0.5487187405482530 0.5621010153237549 F F F  
0.4039703859768693 0.9298850134015026 0.9497882078172992 F F F  
0.6084556292830854 0.4401051062396562 0.0391948805818032 F F F  
0.4344748031326517 0.0598336894014011 0.4482669767885525 F F F  
0.6758636365187058 0.2790776555697079 0.1139687439191803 F F F  
0.8359905835066854 0.7633027074675809 0.6104683989676900 F F F  
0.0011942445685165 0.7305825431939041 0.8944416477294510 F F F  
0.8393339911180036 0.2269177588385958 0.3902484743787085 F F F  
0.7364435415214388 0.0619401883880570 0.0488064936442569 F F F  
0.7770084213290573 0.9251469489260558 0.5409718078316885 F F F  
0.9011923161540025 0.4355797399537522 0.4611629071508503 F F F  
0.9402203323869998 0.5543885958222816 0.9412751021217574 F F F  
0.9379930731532440 0.9304636564996969 0.9519811959002027 F F F  
0.7761504604753782 0.4404048432631740 0.4390309312444032 F F F  
0.7350542707187202 0.5590850430164878 0.9540848689414148 F F F  
0.8984254707085597 0.0606773791469024 0.4550780369940242 F F F  
0.9415347449043878 0.0510710566447159 0.0556837065587459 F F F  
0.7741608136074234 0.5610107489619693 0.5436212546654033 F F F  
0.7353527336810544 0.4391975267190844 0.0595391589674037 F F F  
0.8976792849207200 0.9408834146469047 0.5604856532125524 F F F  
0.9022681117290006 0.5559668451575988 0.5656187319920747 F F F  
0.7329210709165679 0.9413126597598307 0.9452872369249405 F F F  
0.9405500197668175 0.4343797043087037 0.0468216994541422 F F F  
0.7807051205993361 0.0448537934200104 0.4349375077225517 F F F  
0.5513132361834344 0.2476069902335940 0.5599494416177165 T T T  
0.5257153376043466 0.2143145051544646 0.4522206228232051 T T T  
0.4289325946374374 0.2421416855175914 0.2558874644936089 T T T  
0.5914838818544439 0.2421466547482822 0.2434677975398145 F F F

Structure 12 S=5

1.0000000000000000  
20.9172000884999996 0.0000000000000000 0.0000000000000000  
0.0000000000000000 17.8076000213999990 0.0000000000000000  
0.0000000000000000 0.0000000000000000 12.2158002853000003  
Al O C H Fe  
10 63 97 62 2  
Direct  
0.0835692498409511 0.2490005336709039 0.2543723431915603  
0.2504011835733616 0.7548446729046947 0.7597789346761374  
0.2458160175774099 0.2492561100295426 0.2547732697979518  
0.0844796129417679 0.7513563448611008 0.7558058286937123  
0.5863018964380222 0.7425613419590222 0.7386615085319814  
0.4178448611657180 0.7483505966125020 0.7434672423587421  
0.7586461878593269 0.2460053359949046 0.2488793964700936  
0.9188369554615091 0.7472238049835795 0.7518433908583426  
0.9212111418671596 0.2481320409339422 0.2510894008907604  
0.7529865737292100 0.7439526299211323 0.7498919540431617  
0.6795548200604988 0.2479182852738148 0.1768613905853780  
0.8364050838578737 0.7454622336586445 0.6852792256413150  
0.0015344536459782 0.7485092113695895 0.8194267167112447  
0.8400601282713026 0.2468643321688216 0.3159094186339373  
0.7880001004658839 0.1675602849561468 0.1474396850758260  
0.9502245076917540 0.6693329864524711 0.6508285854757868  
0.8941635048073815 0.3273297561684627 0.1508794015900512  
0.7262190612403071 0.8213928686435560 0.6461890170364419  
0.7795167220124456 0.8254994930094703 0.8514625278266563  
0.9492007892779053 0.3294999212010127 0.3509486490344001  
0.8920225552258287 0.6667786859156044 0.8495954555318347  
0.7330316189629206 0.1641897454031562 0.3474903384284767  
0.8882846618529515 0.8244590206858560 0.8529721979319808  
0.7306516949492641 0.3248868739263217 0.3512647803338563  
0.7833981261140194 0.6660510062650705 0.8499082667683007  
0.9477067685398317 0.1696565748004099 0.3555993825507601

0.8964516866616422 0.1664752331418888 0.1484304917404168  
0.7252583590009779 0.6642273134391532 0.6515380521018652  
0.7859368287535206 0.3272157522887354 0.1508809186632133  
0.9460108617727470 0.8279825022373605 0.6537709857789269  
0.3291823528838411 0.2617487124096293 0.1890087463647481  
0.5013372960904980 0.7458409388273738 0.6734453438588590  
0.6690191172498161 0.7432182058631779 0.8108207412075963  
0.4237827960388359 0.3375228535070147 0.4316242698581386  
0.4530189652854881 0.1580294868788217 0.1254038625677061  
0.6166059539101797 0.6645262011168164 0.6435335982509361  
0.5599681442907436 0.3308063639037811 0.1387677691163567  
0.3882879059613353 0.8316024366202198 0.6515516220185154  
0.4512231980971012 0.8204223306738425 0.8442665395219472  
0.6221220739539970 0.3230390177123442 0.3578545406712071  
0.5538326570928741 0.6647778897099623 0.8357048641398382  
0.3857874556555471 0.1666332941891270 0.3464385907847677  
0.5600356581061265 0.8201712574960192 0.8382313284278951  
0.3368338639888331 0.3971035432111215 0.2471239019730450  
0.4449917283567270 0.6649509771149316 0.8359372198575006  
0.6251743194427025 0.1553060224979569 0.3367619422685811  
0.5618635988543315 0.1610787028713816 0.1238460628394818  
0.3827942769148104 0.6761999814650704 0.6399150653634579  
0.4511484459131992 0.3272432935855475 0.1422538601111113  
0.6173915616326560 0.8217637245682451 0.6390109255851315  
0.0030234414433971 0.2475406937039124 0.1871417955313670  
0.1673075626481717 0.7536709969894222 0.6927248771719156  
0.3354166008289405 0.7501186925750364 0.8178938606728310  
0.1650840802955890 0.2492339663577174 0.3206577493224029  
0.1133304845431232 0.1706388710046313 0.1544930840708171  
0.2740806654892066 0.6783163127912136 0.6557575069299608  
0.2185104605627862 0.3280413971969859 0.1507996544874540  
0.0545123277220152 0.8301634452797199 0.6576678447687584  
0.1126590747968484 0.8306518502313278 0.8566273924653969  
0.2679619778021505 0.3355671634577216 0.3574781388962546  
0.2219206815815441 0.6726804564851953 0.8599416818772223  
0.0561935877505614 0.1683762431686342 0.3547804346711420  
0.2213534337964981 0.8306132374104583 0.8596727427595267  
0.0574531916346134 0.3280586534869128 0.3540302140445391  
0.1130583802035414 0.6718660932353649 0.8573681584695515  
0.2777388417926239 0.1752493986776650 0.3571473448848361  
0.2217457744854890 0.1695252875979001 0.1571657180368668  
0.0589687069379157 0.6705686733916160 0.6523115513214365  
0.1102613884374219 0.3297376399886684 0.1519687475479128  
0.2798024989596442 0.8351655756320753 0.6627114114221080  
0.5084129574946644 0.2362181425577713 0.3080243953156220  
0.4056919911354875 0.3188229282321695 0.6196208814461907  
0.5213877634695155 0.2294555591230280 0.5295515159400384  
0.4163183609349624 0.3265491516818320 0.5259923711088867  
0.1673577557610927 0.1414289329098620 0.1308352147822413  
0.3267403879921703 0.6511009748487753 0.6209804082190065  
0.1644068886024218 0.3575174042959064 0.1262531387462102  
0.3337163280418131 0.8616472870987155 0.6322027914837292  
0.1666506369117598 0.8585371806583638 0.8835289006819315  
0.0031077055087252 0.3573647488305752 0.3777440773455775  
0.1674693210992471 0.6438753448848218 0.8829823396480611  
0.0018315402838709 0.1406627566916889 0.3804788484076611  
0.1673230911499255 0.0685708811031408 0.0672783877466898  
0.3208769446375773 0.5828648502598772 0.54911493658840073  
0.1653683480632087 0.4307990480790403 0.0624294329119772  
0.0004076142270231 0.9300856585225544 0.5653775102804668  
0.1666729630414400 0.9309148232758160 0.9489742926556164  
0.3079252162183740 0.4575602714908099 0.4111520419411780  
0.1668891289410160 0.5699926188918883 0.9459024082054287  
0.0013441871149305 0.0678066845895216 0.4454585270757933  
0.1095097422112126 0.0332925705417658 0.0385098357918548  
0.2666436071833019 0.5365421162828206 0.5563572712271170  
0.2232378518610889 0.4674424436280277 0.0376694656799880  
0.0582125392937491 0.9642491079378176 0.5336834721770067  
0.1091655972269774 0.9657381765877536 0.9803270476440081  
0.2608379232666735 0.4733580154475652 0.4896966927316074  
0.2239495033732040 0.5355703920339574 0.9806250738049067  
0.0586656414554767 0.0316568042707666 0.4748963950489770  
0.2244860096538381 0.9659479853940268 0.9782628186104269  
0.0613493940408687 0.4678237213591367 0.4660869806519657  
0.1090636026065536 0.5331551520512307 0.9703891983872172  
0.2737798524090335 0.0368876464289761 0.4799549232218673  
0.2248381516661933 0.0335094928547795 0.0364171261145519  
0.0619708661329514 0.5353879835605878 0.5246011228847340  
0.1082792484531593 0.4650989982104696 0.0275505957151523  
0.2747353106275030 0.9699345116606681 0.5399440206935460  
0.5089808767439543 0.1313213472730776 0.1003701861003470  
0.6716405889090001 0.6362261766504623 0.6227173481400597  
0.5050342060733859 0.3570467971659798 0.1155020215419714  
0.6724278799490505 0.8496219363111235 0.6175428476183275  
0.5060956879864255 0.8483076668394089 0.8652346407317926  
0.3025118553672584 0.3921464460688170 0.3362047677797010  
0.4995799647204223 0.6371012898020439 0.8612853352827662  
0.3313005112067922 0.1429045786124622 0.3778025924525750  
0.5082346392963225 0.0585371262834325 0.0387078419358083  
0.6730463040528212 0.5635489237990144 0.5587606610092021  
0.5027708162339264 0.4295902964678414 0.0502015336406860  
0.3327861762110091 0.9344578631316391 0.5671825896618337

0.5071749461251983 0.9208455037259465 0.9270655957406394  
0.6758631178929680 0.4256789212250435 0.4419491465709545  
0.5001704332437487 0.5653146658218487 0.9276032524286409  
0.3309110457357065 0.0710777422876835 0.4450546098090896  
0.4501554041421096 0.0219301548089649 0.0169539369422985  
0.6161854442014517 0.5249813594732071 0.5339734508650767  
0.5597269177159488 0.4648929772171229 0.0170513949435755  
0.3898498909473134 0.9690621761557571 0.5329718283875821  
0.4496206845501126 0.9536773678471938 0.9616297736840761  
0.6175854873085710 0.4571329814059025 0.4766964573762593  
0.5584922517274474 0.5315056882983233 0.9568929106697484  
0.3889871566706645 0.0360193180774163 0.4732616921412885  
0.5652459046053827 0.9575597258568719 0.9485703736938130  
0.3619433250023728 0.5043432407833185 0.4033227176173809  
0.4432039940414633 0.5300760013159006 0.9606674545807841  
0.6205360469836316 0.0280079363578395 0.4664853173337658  
0.5658108667588384 0.0258313412765331 0.0040228887824733  
0.3690065933335177 0.5653142903435113 0.4734970837910096  
0.4444660409801306 0.4634308813644032 0.0210610723145739  
0.6183281211294758 0.9606665364403827 0.5249017375354684  
0.8418638829441230 0.1385066301069608 0.1230564354588067  
0.0047946193690378 0.6417417707746806 0.6265482083654327  
0.8399911761449029 0.3556839026831570 0.1254622013810614  
0.0002599131772347 0.8573335932308204 0.6304630606739821  
0.8340821656965739 0.8533040940370933 0.8770150811171578  
0.6765425193595079 0.3524014931039254 0.3787281378363615  
0.8377550720420929 0.6382796267832931 0.8750566715097584  
0.6795983694183482 0.1315917795727087 0.3678105343025482  
0.8403118679898953 0.0651739656637980 0.0590688935847346  
0.0048860471555733 0.5685715523461786 0.5617543470837941  
0.8395688693126163 0.4283207672408355 0.0604225069536635  
0.6747129845175116 0.9222285909366273 0.5529182294589895  
0.8355691137597832 0.9265858260318297 0.9411634631816814  
0.0037002260488500 0.4303626814736096 0.4423730899310088  
0.8383762659279033 0.5657028215394239 0.9403144189350160  
0.6792541283781951 0.0593396825281298 0.4335003654250127  
0.7816306956653696 0.0330537536133687 0.0273633267579455  
0.9472223407195370 0.5311895241135477 0.5377892373448426  
0.8968215425809631 0.4624159477600843 0.0260673411032184  
0.7334262220200921 0.9539578804843799 0.5207506396170029  
0.7793133183334259 0.9652475072247709 0.9696149909758467  
0.9466096696724854 0.4635956112930658 0.4793646804573863  
0.8962040380069580 0.5297194245454907 0.9671132141769085  
0.7357075622834268 0.0212390110855448 0.4618923514368311  
0.8942368597798310 0.9587208819614181 0.9729349611886935  
0.7327045508629699 0.4643160666869744 0.4664217242386463  
0.7811134082388562 0.5316413815308276 0.9747586041187779  
0.9435761132696845 0.0336209767307491 0.4771837230050090  
0.8965626514925059 0.0265003975026583 0.0307004925944417  
0.7313170115076154 0.5320368058665430 0.5241378166938165  
0.7817399597249550 0.4643488618881974 0.0337238845323612  
0.9430948226142367 0.9662160463432875 0.5359768441528181  
0.0031883324367897 0.2308605320060250 0.1115129981020946  
0.1687352185860915 0.7304365421947230 0.6207962944673185  
0.3380197545482331 0.7315049233818480 0.8924708201857851  
0.1645919158786377 0.2669448497271209 0.3958050510249847  
0.0646002986619166 0.0596261546699115 0.0627595611756311  
0.11030985684373250 0.9370284433621845 0.5560036583341809  
0.2194488769343017 0.4364061901943011 0.4970332069234514  
0.2693429815991129 0.5630282173252078 0.9623081559926039  
0.2693689016368476 0.9394432240809667 0.9542632880351941  
0.1061075236837170 0.4434513756353136 0.4370665554280106  
0.0643070064147522 0.5586929044727593 0.9436123936148935  
0.2283214131365912 0.0634552719595932 0.4593378349258673  
0.2700632222812732 0.0599506772079569 0.0586562241256081  
0.1072779057943873 0.5633950717940274 0.5418163014918190  
0.0629698598617027 0.4375242620838987 0.0461234566367000  
0.2300602073900723 0.9441143570892934 0.5666243927699735  
0.2294906356173387 0.5504151822657291 0.6156749440154428  
0.0640134351271887 0.9391034668328546 0.9581284914324003  
0.2680851150751445 0.4421912689965464 0.0645227040506283  
0.1039249593151342 0.0572362118122709 0.4507485350635819  
0.3267725837620823 0.2564286705549380 0.1096719864119503  
0.5009300790422394 0.7559549404643066 0.5953746299100056  
0.6666147297792816 0.7662220383001903 0.8828138064281559  
0.3358089491211286 0.3435772728891829 0.2093817335116885  
0.4057205856274586 0.0478347460853058 0.0443047837645943  
0.4353247326432509 0.9428298654747940 0.5542443121796600  
0.5732777973922748 0.4274231275645263 0.4579841044378974  
0.6029398779635630 0.5583378467345534 0.9312988946134071  
0.609632980637385 0.9318896250175588 0.9204260185748003  
0.3986477149985598 0.4913673217817757 0.3429261373288476  
0.3976544373429545 0.5555137468944057 0.9378559905922128  
0.5765645398011577 0.0578067576195610 0.4460579007017453  
0.6105328619352738 0.0549932617973851 0.0213750306285160  
0.4115633720875611 0.60006089565101342 0.4697323708036746  
0.3999399276496681 0.4368288172000281 0.0465724239821575  
0.5724811930837443 0.9371558226608498 0.5502040575788667  
0.5707597358565770 0.5487817284732470 0.5608984465958960  
0.4048247158211177 0.9247828790597479 0.9439340443453882  
0.6052165106825254 0.4391134139951648 0.0392806773731494  
0.4337382250051421 0.0623322977187702 0.4481090338049108

0.6809251939720173 0.2742052358694584 0.1071549556430328  
0.8360774683177029 0.7636138586440446 0.6103281513192760  
0.0009936301956087 0.7303272628809305 0.8943585258526144  
0.8398536981196466 0.2258200242768688 0.3892373010420889  
0.7375389706274231 0.0622805540527992 0.0489380590897888  
0.7775399291264709 0.9249657236375060 0.5426970773435859  
0.9013840108949162 0.4355541734006660 0.4616543705534061  
0.9410091031477739 0.5552490682063195 0.9405593416538035  
0.9383306740834111 0.9295204280889300 0.9513608147338199  
0.7780442429192138 0.4404129686178254 0.4392387914438912  
0.7358516978612335 0.5587849420654020 0.9545619251218675  
0.898633308057131 0.0607021788922227 0.4549454741149022  
0.9425461347572185 0.0502141438178756 0.0549117371737603  
0.7756185023637248 0.5616261597990160 0.5431941427591487  
0.7369040308918899 0.4389463111893710 0.0604090405577377  
0.8977859948866367 0.9408848311223055 0.5603593841225901  
0.9024754826880951 0.5559887851782394 0.5661025896690179  
0.7333026780610382 0.9415464727126753 0.9455389897840820  
0.9420532478341010 0.4352763105490078 0.0464427345153221  
0.7815792414051267 0.0447772074959855 0.4367200646030339  
0.5629564072137414 0.2528421273585125 0.5401886941571550  
0.5169558596374388 0.2280185569737859 0.4484161851500486  
0.4325829278024209 0.2328685830690733 0.2356584606590154  
0.5917413223078252 0.2435924580018335 0.2452752185726265

Structure TS7 S=4

1.0000000000000000  
20.9172000884999996 0.0000000000000000 0.0000000000000000  
0.0000000000000000 17.8076000213999990 0.0000000000000000  
0.0000000000000000 0.0000000000000000 12.2158002853000003

Al O C H Fe

10 63 97 64 2

Selective dynamics

Direct

0.0848498649534335 0.2482189741378562 0.2540587245809576 F F F  
0.2500044568362441 0.7530944066131937 0.7628951495414142 F F F  
0.2489446267389042 0.2502999030148061 0.2556521166010270 F F F  
0.0844026363950832 0.7507274791422347 0.7572240070645506 F F F  
0.5857635146336548 0.7437912993948146 0.7406744495743993 F F F  
0.4172340121049345 0.7471520970118064 0.7471206321767667 F F F  
0.7570619697263936 0.2459025762740481 0.2492864947413054 F F F  
0.9187119272663011 0.7469840912541557 0.7523940410342291 F F F  
0.9207748181095567 0.2476406577826040 0.2520599797680845 F F F  
0.7526515549474198 0.7444809789944884 0.7497333016053886 F F F  
0.6743849325475608 0.2474166787658376 0.1781855324982189 F F F  
0.8360305771879624 0.7455465565174251 0.6857001250442281 F F F  
0.0011458046300774 0.7480623345105002 0.8204339529080897 F F F  
0.8384114499078166 0.2466724354404022 0.3162602766273679 F F F  
0.7850839763912418 0.1673208389075285 0.1492183554646758 F F F  
0.9496820100918342 0.6689174446027053 0.6514971365754150 F F F  
0.8915455153159968 0.3266475057180926 0.1512671675391388 F F F  
0.7256554802999489 0.8222893820116255 0.6450984135969691 F F F  
0.7789636508757667 0.8259043237703736 0.8509412516259616 F F F  
0.9486041415048589 0.3289547170472105 0.3510329295174159 F F F  
0.8912118709190793 0.6665291184838296 0.8504425328979295 F F F  
0.7282943536438538 0.1652266322438223 0.3462699448593867 F F F  
0.8877133236495425 0.8246202327696111 0.8537526998415501 F F F  
0.7286975708385910 0.3254044808161751 0.3489043182258555 F F F  
0.7825799572956171 0.6662227363447570 0.8501159548067534 F F F  
0.9468952978343737 0.1692494048893920 0.3553998873228252 F F F  
0.8936815972172951 0.1667192118671892 0.1493770652185660 F F F  
0.7245327254656644 0.6645277261389140 0.6515914198542987 F F F  
0.7831407577257465 0.3258595814917271 0.1496785485755865 F F F  
0.9457560104733957 0.8277708557591410 0.6547872166159010 F F F  
0.3384456143656180 0.2587724919792507 0.1976070266990320 F F F  
0.5009142476535402 0.7456438297838517 0.6769978319213408 F F F  
0.6687571901487033 0.7446701716222393 0.8109998570572543 F F F  
0.4222380600666185 0.3168900374026128 0.3579641835333050 T T T  
0.4505791337993017 0.1591902073223110 0.1378155930944729 F F F  
0.6158634223144475 0.6646951981927387 0.6452120988791279 F F F  
0.5657426090375139 0.3299125810364245 0.1440577829869127 F F F  
0.3878056133895029 0.8298199508379014 0.6555114402730098 F F F  
0.4508364264439066 0.8207253273649329 0.8473254727108852 F F F  
0.6206746750540901 0.3182757461235539 0.3660507692048185 F F F  
0.5548723440296683 0.6664164683525655 0.8398550513041698 F F F  
0.3889496844358433 0.1585942650110539 0.3468064480178157 F F F  
0.5594810841711961 0.8231176103106250 0.8390194134962314 F F F  
0.3324846457039783 0.4025806471814235 0.2380859997247313 F F F  
0.4460014082865342 0.6640692468897811 0.8405475702631477 F F F  
0.6201429777458003 0.1547539068860146 0.3324243778200895 F F F  
0.5592585223949129 0.1653185677134275 0.1206677101366012 F F F  
0.3827194017253746 0.6746304017119655 0.6434595486233334 F F F  
0.4566446033088738 0.3250839434057369 0.1372354584081705 F F F  
0.6167687426016357 0.8220977416577426 0.6391848066740451 F F F  
0.0026421183963805 0.2470826849235834 0.1876350754792568 F F F  
0.1670412384065187 0.7523698213640628 0.6944170810049286 F F F  
0.3353489107066423 0.7486839369098135 0.8218403868050927 F F F  
0.1663065257854015 0.2487711936087464 0.3211656487808057 F F F  
0.1148371767234266 0.1702863965783550 0.1557903522848676 F F F  
0.2740441933540296 0.6769095825592188 0.6596896005133459 F F F  
0.2193597282745543 0.3231738990277080 0.1437557369930005 F F F  
0.0542553726472192 0.8298550515980239 0.6586388254226918 F F F

0.1124431237149679 0.8303490416076329 0.8574946060680944 F F F  
0.2648953742898783 0.33886635711047106 0.3491299163001287 F F F  
0.2213630820612238 0.6720188317149010 0.8626850271272843 F F F  
0.0554745394380376 0.1676269122292666 0.3540757982905944 F F F  
0.2210900065843902 0.8295193580884543 0.8616673381490259 F F F  
0.0569901246781797 0.3273019488247755 0.3543283832159219 F F F  
0.1125402473844304 0.6708968567905558 0.8589894222833081 F F F  
0.2808539804359356 0.1737604989183978 0.3591104762278547 F F F  
0.2234844753743559 0.1670925545907807 0.1625847598522299 F F F  
0.0584167482003366 0.6700068408904940 0.6532886643111411 F F F  
0.1109994561334204 0.3285801236796360 0.1526080250759634 F F F  
0.2792962796733107 0.8332075963001984 0.6660520930830245 F F F  
0.5139985272848088 0.2320763741027577 0.2965741645871482 T T T  
0.4582851739166482 0.4165045921001606 0.5093800033282970 T T T  
0.5372279010591062 0.2326865141312217 0.5141591706693811 T T T  
0.4419460010018305 0.3500240257025140 0.5087776427203363 T T T  
0.1691107482256626 0.1405598939690265 0.1339752478227254 F F F  
0.3265102058899174 0.6497382825038969 0.6237383604566205 F F F  
0.1655428261950860 0.3544799729506707 0.1236804515177852 F F F  
0.3332046580659451 0.8595990106809737 0.6358484537286984 F F F  
0.1665039118111267 0.8580128670168961 0.8848013090365257 F F F  
0.0027703836317130 0.3567020026587358 0.3777961776589436 F F F  
0.1669156631130235 0.6428345559992295 0.8850043556634191 F F F  
0.0012128794822601 0.1402264087021550 0.3800951516824398 F F F  
0.1684148307262845 0.0679357548562507 0.0692018056385066 F F F  
0.3198572227898779 0.5828800924579340 0.5498147846326376 F F F  
0.1659780613421376 0.4284741223131121 0.0610947115358087 F F F  
0.0000843292184101 0.9298542383155990 0.5661451520251717 F F F  
0.1668654273357077 0.9305349882276772 0.9498557577108286 F F F  
0.3045600603491749 0.4602521836562659 0.4056447367737661 F F F  
0.1666422639335821 0.5687148281214149 0.9470658918973527 F F F  
0.0006741327011071 0.0674636384662151 0.445547770792271 F F F  
0.1103861384409299 0.0331869449896018 0.0401367326809705 F F F  
0.2669993780462505 0.5345037551716345 0.5595650684375428 F F F  
0.2236436963521129 0.4657558392516208 0.0372018872703421 F F F  
0.0577768381952595 0.9641880897517083 0.5342165024893148 F F F  
0.1095992109377946 0.9657939353476976 0.9814693483063266 F F F  
0.2603776052352558 0.4726279118120402 0.4902050403537572 F F F  
0.2238708843794655 0.5344138783716161 0.9813913719784253 F F F  
0.0580597438262558 0.0315048179748771 0.4751408871404408 F F F  
0.2248685701227018 0.9652762136159154 0.9789051615534561 F F F  
0.0609093121747435 0.4672475050644920 0.4665395252215063 F F F  
0.1090034237655999 0.5313661447958822 0.9711967746161605 F F F  
0.2741617675625960 0.0352489643094884 0.4841222276572950 F F F  
0.2256513916914642 0.0326784214716156 0.0374925153517296 F F F  
0.0615059659069459 0.5347950979244303 0.5251942640235256 F F F  
0.1086567391990130 0.4628543965764180 0.0272155290990810 F F F  
0.2746936512775520 0.9684451475918365 0.5445088753505658 F F F  
0.5048416334940455 0.1341398294677845 0.1057230717626751 F F F  
0.6707860763426723 0.6363311574678221 0.6237284855265912 F F F  
0.5101219023451407 0.3551939873656309 0.115797954387093 F F F  
0.6716197169470490 0.8499477650245808 0.6167828288218615 F F F  
0.5052183696425487 0.8500703506584344 0.8673005671872644 F F F  
0.2997140929895608 0.3963914030546150 0.3247334884016979 F F F  
0.5010489353776677 0.6372405653336273 0.8648429217248363 F F F  
0.3330475115640112 0.1391874089615470 0.3792157411343737 F F F  
0.5047902104118904 0.0609219726501706 0.0434892287263438 F F F  
0.6720230341237396 0.5632502430076585 0.5600268629758745 F F F  
0.5087471244190453 0.4279125003200051 0.0501964695696984 F F F  
0.3324729075055899 0.9320945590036018 0.5706988579783996 F F F  
0.5053690547828822 0.9229551183613935 0.9297005866590311 F F F  
0.6742854008784889 0.4246626517895820 0.4434735582637828 F F F  
0.5032196760891168 0.5645709238471355 0.9295881933530197 F F F  
0.3315446622005567 0.0678973892506747 0.4476841682216204 F F F  
0.4472299726346520 0.0233784039814040 0.0208060332419038 F F F  
0.6150906686234734 0.5249915245491366 0.5348153801141393 F F F  
0.5649724634798829 0.4647344194411858 0.0168208742642264 F F F  
0.3898090714832563 0.9652546125396881 0.5351293262831973 F F F  
0.4475486717670866 0.9552792643620975 0.9644984068396738 F F F  
0.6162792846123466 0.4570706657768895 0.4775539932214130 F F F  
0.5622147237333053 0.5318129096603812 0.9575867135770153 F F F  
0.3893136914131645 0.0317423145165776 0.4746989209266772 F F F  
0.5628866503734926 0.9606616753446886 0.9521689464639564 F F F  
0.3565248879855787 0.5097807166485779 0.3950734143129324 F F F  
0.4470554557890409 0.5276479020404850 0.9626939099820930 F F F  
0.6171249468364337 0.0258621471062952 0.4614551441457522 F F F  
0.5626494252238956 0.0288271403597591 0.0082965480619777 F F F  
0.3652579004735585 0.5688974749393623 0.4680536971711504 F F F  
0.4496602073091083 0.4606030073518710 0.0220636533976943 F F F  
0.6160256243350233 0.9587985510611148 0.5207644850449071 F F F  
0.8392745924898293 0.1385952155354673 0.1243087658322679 F F F  
0.0043199486071757 0.6412547980506886 0.6272144756463121 F F F  
0.8375098245192802 0.3547291253941012 0.1251483378676426 F F F  
0.0000825625857388 0.8570879706958294 0.6314043823908193 F F F  
0.8335178282057782 0.8535598069326369 0.8771734055568032 F F F  
0.6746053539769008 0.3507252215855488 0.3812327620655154 F F F  
0.8368434057519281 0.6382120840746097 0.8754924007208729 F F F  
0.6751636462053341 0.1319477571279037 0.3643730707805517 F F F  
0.8380380495310646 0.0653870552552291 0.0599724935902586 F F F  
0.0044168489744649 0.5681386491765323 0.5620990032837057 F F F  
0.8373012581702781 0.4275751894148527 0.0603635668622715 F F F  
0.6730142773563728 0.9223823868240260 0.5509122015989050 F F F



0.8345362734788324 0.9268702130331903 0.9415076621926204 F F F  
0.0032774825762232 0.4298588314383380 0.4423737701442789 F F F  
0.8370512634002196 0.5654086940102232 0.9406337016151980 F F F  
0.6752573588098230 0.0593787141052431 0.4299262518286469 F F F  
0.7796623564433105 0.0327247819369205 0.0277919927734800 F F F  
0.9467604275072432 0.5308803174831738 0.5375673435245787 F F F  
0.8947778632053485 0.4615156395024087 0.0265461380949290 F F F  
0.7311534295543325 0.9558659895840975 0.5195424682079448 F F F  
0.7779610960641179 0.9649825034132320 0.9697843854585599 F F F  
0.9461791079172102 0.4633131302974931 0.4790329163901674 F F F  
0.8946152814737189 0.5289559793625855 0.9678095889551415 F F F  
0.7323548264331805 0.0230507917697622 0.4601291772359133 F F F  
0.8929008419386051 0.9595616250129453 0.9736793568716493 F F F  
0.7312962019030280 0.4631363400417001 0.4681693729370622 F F F  
0.7795861582512202 0.5315849937094654 0.9746543669292507 F F F  
0.9430063899284420 0.0331684304352535 0.4776000936462239 F F F  
0.8946277360437875 0.0272997193124809 0.0316747135990454 F F F  
0.7301446396023010 0.5310606102208837 0.5256145993379491 F F F  
0.7797587932038113 0.4641437107333886 0.0333419661583463 F F F  
0.9427004002197421 0.9658545172452548 0.5366843860222374 F F F  
0.0031055050576967 0.23550794242151577 0.1100161344884398 F F F  
0.1688147122834707 0.7277249950551834 0.6234990115437142 F F F  
0.3376037830383254 0.7295114300529448 0.8961539126602602 F F F  
0.1664427237769991 0.2780166480299755 0.3883816151619470 F F F  
0.0656086414053618 0.0597558259016395 0.0645959445785849 F F F  
0.1027481654578111 0.9371617254213191 0.5565364049775141 F F F  
0.2203161915180729 0.4339838007022934 0.5003531185400689 F F F  
0.2690999584658087 0.5624633825034664 0.9638001155532407 F F F  
0.2695876451032930 0.9385971769212702 0.9544238256992372 F F F  
0.1057688693669832 0.4429336572587935 0.4378762023718252 F F F  
0.0641042995347689 0.5569006684804023 0.9450336322717376 F F F  
0.2289988028032468 0.0627486450391572 0.4641898343722062 F F F  
0.2709409701683470 0.0590967183080977 0.0594271038976828 F F F  
0.1068931138130793 0.5625411969309582 0.5426873902902258 F F F  
0.0634428938885776 0.4350138540439730 0.0456491966918335 F F F  
0.2299389489065078 0.9433674991947356 0.5722796586356012 F F F  
0.2315765287476736 0.5455519756166254 0.6231587255168307 F F F  
0.0642856438522728 0.9395360365541165 0.9591979498894716 F F F  
0.2684741282429428 0.4406551754396091 0.0645620116039751 F F F  
0.1032383293290735 0.0572288148405349 0.4508565000478200 F F F  
0.3385281459711891 0.3150507047818891 0.1857183882321252 F F F  
0.4996960258713017 0.7443456868707656 0.5976119531555710 F F F  
0.6669321121315193 0.7671593120383733 0.8833837698433769 F F F  
0.4056556464480517 0.3624960546120513 0.3218880514122441 T T T  
0.40237841396595978 0.0484404606221744 0.0479767943451535 F F F  
0.4349762653473590 0.9380030357346314 0.5555786256490336 F F F  
0.5714005351804730 0.4288773130764554 0.4584021470238397 F F F  
0.6060628541909452 0.5599485544934240 0.9318764205129995 F F F  
0.6077331715485244 0.9358778281182438 0.9243531655822679 F F F  
0.3904009275292424 0.5008206311990548 0.3285440980190231 F F F  
0.4009452487360079 0.5521712607441316 0.9409924909633034 F F F  
0.5724672948504690 0.0534006662923545 0.4388786283793706 F F F  
0.6072472026902958 0.0582240423149472 0.0256942410529462 F F F  
0.4068727169803736 0.6055048700552561 0.4613148625605348 F F F  
0.4056744238861185 0.4329894097222535 0.0481041752986400 F F F  
0.5705423646036678 0.9337980095751490 0.5449452067162639 F F F  
0.5695201590111694 0.5487579567057566 0.5610404750991549 F F F  
0.4029455932130119 0.9260799601100160 0.9463105782231196 F F F  
0.6111865255119540 0.4403259997327069 0.0378808831144255 F F F  
0.4341050895714389 0.0567006460663180 0.4470962215068255 F F F  
0.6736564021501863 0.2838845451156828 0.1185335148357680 F F F  
0.8361773268405912 0.7621814482952303 0.6100048474754800 F F F  
0.0007147974015496 0.7291802163178716 0.8950151795873396 F F F  
0.8385863002898120 0.2315508003538369 0.3925911036688063 F F F  
0.7352815215669750 0.0614376928228353 0.0490849326057656 F F F  
0.7757756326808334 0.9283614675981724 0.5426650706907097 F F F  
0.9009104974868123 0.4354738414345931 0.4609641820140027 F F F  
0.9396584994440147 0.5541848678062422 0.9418013718290865 F F F  
0.9372735671413110 0.9308725576455572 0.9522843432495236 F F F  
0.7766892824996958 0.4390939335344513 0.4414646469360832 F F F  
0.7344886802487167 0.5590692100211214 0.9543671529517255 F F F  
0.8979910244916667 0.0600975531498023 0.4553409909373727 F F F  
0.9404172825627484 0.0514246036129506 0.0561088767911215 F F F  
0.7746556568825440 0.5602402598194516 0.5446912086651992 F F F  
0.7346873680551553 0.4391348093918879 0.0596148434678909 F F F  
0.8974548411395631 0.9404291819001216 0.5612400353021911 F F F  
0.9019701600874512 0.5557565268411153 0.5655581651898842 F F F  
0.7321685392237214 0.9408566221370833 0.9453875129646718 F F F  
0.9399086570802595 0.4342269987522585 0.0471583044430659 F F F  
0.7779746725464918 0.0478010974226208 0.4360923696499626 F F F  
0.4803262114231479 0.3040052554739225 0.5120120770850910 T T T  
0.3939114082123351 0.3324119099427730 0.5382794677499532 T T T  
0.5748532173304048 0.2640019817115218 0.4986255552916020 T T T  
0.5252690042368173 0.2174653456158057 0.4383786912584724 T T T  
0.4244569102113165 0.2389963383837309 0.2488482612927110 T T T  
0.5889196133235414 0.2405997776276316 0.2390632126122199 T T T

Structure 13 S=4  
1.0000000000000000  
20.9172000884999996 0.0000000000000000 0.0000000000000000  
0.0000000000000000 17.8076000213999990 0.0000000000000000  
0.0000000000000000 0.0000000000000000 12.2158002853000003

Al O C H Fe  
10 63 97 64 2

Direct

0.0846090213517311 0.2482792176740773 0.2540738614088580  
0.2500761241039594 0.7530877169928878 0.7628574430397530  
0.2477908543829997 0.2518353940845452 0.2544897773908371  
0.0844728253329324 0.7508140082004330 0.7573813112690485  
0.5857351789197942 0.7432956682309818 0.7408357352696662  
0.4172879552970874 0.7468530477113186 0.7473530062857491  
0.7573292318573209 0.2462044439445691 0.2489775724027710  
0.9187146207099816 0.7469531060904668 0.7524679736874372  
0.9208049952313245 0.2476163321750936 0.2521598067262009  
0.7526334153057919 0.7443061629210883 0.7496710637633948  
0.6752547760088238 0.2476456866988952 0.1783165351605170  
0.8359995454348561 0.7454632831595369 0.6856806787392188  
0.0011766180518259 0.7481578899965428 0.8205515569030596  
0.8384729360200113 0.2468339283301431 0.3163624633850530  
0.7851105858473089 0.1672108232224565 0.1494754882066147  
0.9497438754081012 0.6689160309733934 0.6516207571059663  
0.8917691771604154 0.3265853387933270 0.1511977116719286  
0.7256267422857469 0.8222376545147508 0.6453050809231389  
0.7789571558722139 0.8257861030667171 0.8510421510988170  
0.9485863633861004 0.3290317091643228 0.3510895273919272  
0.8912327794702343 0.6665409508524027 0.8504674645660129  
0.7286500668726286 0.1653941430315404 0.3469844479116956  
0.8877092729786448 0.8246332420809289 0.8536801129163111  
0.7285978259362949 0.3255307602303693 0.3493019581860409  
0.7826024973185464 0.6660687374328184 0.8499715166460933  
0.9469401861996902 0.1692219962197818 0.3555560888385009  
0.8936776243300164 0.1666442398715347 0.1494974836539920  
0.7243451231485638 0.6644110754697993 0.6515028518180735  
0.7834017593358785 0.3260502463971116 0.1498414764404437  
0.9458163529520964 0.8277038312152363 0.6547701650904352  
0.3336240544860460 0.2606739341915152 0.1965205379894836  
0.5008694425705088 0.7456046498457006 0.6773602121785892  
0.6687688290978049 0.7443654610728787 0.8111280241674075  
0.4167128422322395 0.3233501087254009 0.3684193115435664  
0.4518609449444689 0.1594202369695762 0.1351920789380484  
0.6157109222156381 0.6647729567569848 0.6450704087885344  
0.5649853293481385 0.3295884182442148 0.1445897095117659  
0.3879848802147501 0.8299004688763374 0.6555026888979679  
0.4507884172751729 0.8204500037622545 0.8476207639825205  
0.6204900414236332 0.3186828607763503 0.3651798356046658  
0.5548425197837515 0.6654822681775484 0.8398832109176104  
0.3889114077539034 0.1623134299796904 0.3507388929528824  
0.5594389191340559 0.8222748474318076 0.8395670833542423  
0.3298854741107899 0.4041318774132782 0.2353721810462633  
0.4459548684804784 0.6636859235064486 0.8409608232900373  
0.6208729090898142 0.1536687190789096 0.3315007419934037  
0.5606348778953738 0.1645381752500434 0.1212985636370336  
0.3828694948579136 0.6747616003221026 0.6435858856928858  
0.4561795767692040 0.3290968188826427 0.1499650780003417  
0.6167415206909700 0.8222675790740810 0.6397136791896847  
0.0025223949096417 0.2468235507774809 0.1876992942641206  
0.1671358623157824 0.7524127292214784 0.6944282327891323  
0.3353853763833712 0.7487079432716941 0.8218905074768267  
0.1659610450957687 0.2491242321685959 0.3215422988166651  
0.1149498307078211 0.1704891619843546 0.1557883313879946  
0.2742073110741162 0.6769461555783594 0.6597078406852868  
0.2180306649046907 0.3235774849110362 0.1433087134323929  
0.0543276312380331 0.8299001125345921 0.6588119625495132  
0.1126237969050875 0.8305551437298940 0.8575871928092740  
0.2643104462283827 0.3395975935536074 0.3493301005565053  
0.2213937385316420 0.6721120031759283 0.8627776647051112  
0.0555095918709303 0.1675419122692600 0.3539519516309831  
0.2212885134280609 0.8296901448277797 0.8615662460221274  
0.0569394893799725 0.3271913558283347 0.3547022711222538  
0.1125648599531388 0.6711996293997967 0.8590725586097987  
0.2808001973405722 0.1739524185152494 0.3603947551131766  
0.2234614816536261 0.1671042514985117 0.1636308501168801  
0.0584821587641382 0.6700274720263809 0.6534331831545817  
0.1098791324292280 0.3290046994879753 0.1525679760105006  
0.2794561071622526 0.8333763781376519 0.6657186871752219  
0.5153695945697255 0.2329611398665573 0.2985101966060406  
0.4620333130749897 0.4080682902295180 0.4923818564473847  
0.5364035608539700 0.2351266924432943 0.5162305471082572  
0.4391838206662771 0.3417875492359425 0.4797720661481856  
0.1692228654500097 0.1406171378795806 0.1344343034517924  
0.3266938797244883 0.6497591253124364 0.6237685169963356  
0.1643619010543147 0.3549541134922264 0.1233727783129036  
0.3334324851790331 0.8596017553380223 0.6355419860217019  
0.1667024081059603 0.8581672366699951 0.8848561201226937  
0.0027501341003788 0.3567167588152110 0.3779836430986496  
0.1669043792497528 0.6430102084716579 0.8850417386174788  
0.0012583376061874 0.1401554174089054 0.3800818891972045  
0.1687137771297785 0.0680246226206470 0.0695599638979024  
0.3201525761030735 0.5829701946162391 0.5498057378044269  
0.1651914909985434 0.4287947581915076 0.0608466656138724  
0.0001565645868705 0.9297876391771285 0.5661423217173590  
0.1671313574895779 0.9306607176391618 0.9500198308606408  
0.3045416825305033 0.4609236484128089 0.4049154646667474  
0.1664414507452641 0.5688913477526680 0.9469542402070421

0.0007472702551064 0.0673808567893411 0.4454912424337837  
0.1107021034257970 0.0332998096205808 0.0404408233384104  
0.2674619599236682 0.5343917590241773 0.5599145214868300  
0.2230696869770197 0.4657218338168830 0.0371469059369727  
0.0578438064616458 0.9641123403508024 0.5341806719138985  
0.1098874843847907 0.9659418056748166 0.9816932492764555  
0.2607794763228592 0.4727425253935625 0.4902335924504582  
0.2235587545209143 0.5343650385784725 0.9813433603978376  
0.0581286671776041 0.0314196128411333 0.4750896128982700  
0.2251467129131177 0.9653945991733278 0.9790626788281125  
0.0609772250579801 0.4672016627587334 0.4667309710680280  
0.1086546331199063 0.5318116361767412 0.9708816151717139  
0.2746158129252738 0.0355920731731080 0.4842652510250487  
0.2259542540717494 0.0327725447833077 0.0377466399446875  
0.0615805169116742 0.5347507239740735 0.5253877840668647  
0.1080215257362749 0.4633397678927855 0.0268876398762594  
0.2750415857399220 0.9685210180971890 0.5439273275521816  
0.5064081987194820 0.1336776959371895 0.1046896358522007  
0.6705901251981559 0.6362605810473991 0.6235979654783541  
0.5093869037235254 0.3572498802254871 0.1212711931492186  
0.6715894859229051 0.8500122887807823 0.6171834626812872  
0.5052638448533744 0.8495144718513387 0.8676301752674124  
0.2987476489432023 0.3975055918919236 0.3235705864389986  
0.5009384662803492 0.6366354377713941 0.8652182660723278  
0.3328683295103945 0.1403753496411569 0.3818935498580853  
0.5059793699237074 0.0605377152949439 0.0428891058084996  
0.6716690349149604 0.5631785862784798 0.5599854721480857  
0.5078724014173526 0.4289707843621283 0.0544374050713692  
0.3328104236577907 0.9321226282842118 0.5701178573027172  
0.5057219459060339 0.9225041219968541 0.9298146251523394  
0.6737793911462434 0.4246877552210619 0.4436513244398421  
0.5028689288648071 0.5642018925891171 0.9307928027304164  
0.3320603353233944 0.0685913120436999 0.4486383657136390  
0.4481535204282685 0.0233976408532554 0.0206226704606291  
0.6146772974148655 0.5250869372007920 0.5345872339608088  
0.5642610758429577 0.4648509473396136 0.0197340354040534  
0.3901852767968539 0.9652965272114143 0.5347088118998184  
0.4480669236324109 0.9551839393415029 0.9647052757355947  
0.6156652813739305 0.4570689426389561 0.4775128326365960  
0.5617676703401702 0.5313044489166501 0.9591356157644367  
0.3898120035543214 0.0321896509251479 0.4751062863628837  
0.5634480818344526 0.9599109665307903 0.9517495670365315  
0.3564846565823503 0.5104624385405491 0.3942510423791114  
0.4465536528433013 0.5279244509587123 0.9647451398901770  
0.6173591365906596 0.0258587926955826 0.4615060136471916  
0.5636379455839041 0.0281099292381326 0.0076305483046447  
0.3654033938322036 0.5693131299638308 0.4676500794022442  
0.4488833934716714 0.4616374321040032 0.0258291864614583  
0.6161399157170582 0.9589019780994120 0.5209880512299097  
0.8392865713695011 0.1384975504679431 0.1244677178666613  
0.0043936793193206 0.6412597793393023 0.6273433030846395  
0.8377779345685907 0.3547876446538298 0.1251367140051521  
0.0001415397512915 0.8570517426472938 0.6314706903068381  
0.8335031366510224 0.8535072739557640 0.8771880660923876  
0.6746027032336083 0.3510161273403335 0.3811151647227414  
0.8368803254596119 0.6381394691103851 0.8754293621469981  
0.6758777202823957 0.1314749108785665 0.3646611269186918  
0.8380516002648910 0.0653092277866405 0.0600721851172232  
0.0044918785995435 0.5681478543803644 0.5622057748428205  
0.8374945711531961 0.4275646892975153 0.0602901485136349  
0.6730887325817553 0.9224717016422690 0.5513092293720249  
0.8345455733242378 0.9268215966097733 0.9415334275355068  
0.0033209785781046 0.4298828155776683 0.4424802849172390  
0.8371265898591986 0.5653440545714499 0.9405515518532471  
0.6756323903031752 0.0591597679508966 0.4301807425015405  
0.7796779940648606 0.0326329575944431 0.0279310230412787  
0.9468224990184900 0.5309493403658275 0.5375599790486071  
0.8949386293773698 0.4615381510767560 0.0264649314086638  
0.7313141214907465 0.9558103387106979 0.5200729352191740  
0.7779737402067103 0.9649051919909994 0.9698928605742453  
0.9462249863241173 0.4633900084900058 0.4790243752458929  
0.8947195718298389 0.5289614836652407 0.9677150155528935  
0.7326495176981214 0.0228924580223704 0.4605632697964275  
0.8929206630997779 0.9595381631041996 0.9736403291098589  
0.7308634705146726 0.4629271465688244 0.4686371066047516  
0.7796747986484781 0.5314748449596544 0.9745589347273925  
0.9430838146417028 0.0330887320592729 0.4775661765918717  
0.8946478292803158 0.0272660666313815 0.0316719643106729  
0.7297979607628531 0.5308074325737689 0.5260392521294551  
0.7799018487687699 0.4640457569770355 0.0332668044464292  
0.9427818262355461 0.9657788578083787 0.5366545368540430  
0.0030376517526299 0.2363644550580387 0.1097484659147639  
0.1688855765147763 0.7273292291368165 0.6238279914254744  
0.3375259761448947 0.7295597359280568 0.8962311203981413  
0.1660708848448590 0.2788800307823417 0.3883014249390920  
0.0659445057404328 0.0598964612754385 0.0649243060809739  
0.1028015824233275 0.9370690554284303 0.5565249900385991  
0.2209819858425646 0.4337689553003907 0.5005744980970739  
0.2688911434768040 0.5622116950349916 0.9638328650434567  
0.2698694662210896 0.9387308240722927 0.9545141164513756  
0.1058630238668815 0.4428893700710109 0.4381716114535795  
0.0638789161061693 0.5575235150363947 0.9445741838563770

0.2295091020752524 0.0632048326220060 0.4643265170868340  
0.2712734649430918 0.0591750855487436 0.05959276419711116  
0.1069784655860646 0.5624401065333694 0.5429853623757240  
0.0627635952567378 0.4355929744077284 0.0452943312451800  
0.2302281254133620 0.9433266915589246 0.5712133249719366  
0.2322428807043399 0.5450977106687531 0.6239740075175154  
0.0645621268313674 0.9397268222713817 0.9594204932436974  
0.2677854961151714 0.4404406421921120 0.0647380677580308  
0.1033110472022062 0.0571288685448512 0.4507932717908634  
0.3349763822455266 0.3172589301473354 0.1865972954255844  
0.4996253091993544 0.7427311877833702 0.5980633755616704  
0.6669119965438742 0.7670834103277073 0.8833636131965175  
0.4170846365532798 0.3704727584412597 0.3263390363122736  
0.4034618853718201 0.0488777543365555 0.0477151599809679  
0.4352953958500208 0.9377686009199874 0.5547927562260251  
0.5704791484042520 0.4291601648557811 0.4590408807609664  
0.6057568649553845 0.5587883461592954 0.9327701405918969  
0.6080989916875924 0.9348366639742010 0.9236984607041746  
0.3901374639931907 0.5020676558117152 0.3272577445832637  
0.4005198655845553 0.5523507329087644 0.9424549104178738  
0.5727499438431880 0.0534403604117687 0.4388050142844747  
0.6083117985378567 0.0574176404316396 0.0247342910993682  
0.4069486614248076 0.6060226894571651 0.4607523403137530  
0.4047976324075440 0.4346364099152599 0.0528018740372676  
0.5706198537988230 0.9340035198459185 0.5451843105444548  
0.5690812229579472 0.5489405653927729 0.5604807080599937  
0.4033138549164633 0.9262230877494610 0.9469451181769941  
0.6103428578150170 0.4402186675958108 0.0410595294086559  
0.4347095705906928 0.0571693837695733 0.4480645578687608  
0.6741457839088079 0.2825503616853947 0.1168347063860639  
0.8361578831193308 0.7621618365719728 0.6100153713084584  
0.0007221244400008 0.7291184409529730 0.8950504314332411  
0.8385642000103247 0.2313751304678184 0.3925506519529469  
0.7353076691765705 0.0613450012842543 0.0492791493783903  
0.7759037738854985 0.9283389765854446 0.5433231131914208  
0.9009523942974829 0.4355910669216196 0.4608460518899643  
0.9397416211790254 0.5542301462415010 0.9417084733986953  
0.9373043057364419 0.9308886268613115 0.9521793883938854  
0.7762098763488878 0.4386500206443961 0.4422029370530681  
0.7345561820532951 0.5589124614456825 0.9542548068279901  
0.8980651510668981 0.0600081133599517 0.4553218895081743  
0.9404347220320629 0.0514323178582179 0.0560513463906721  
0.7743442218941351 0.5597919244106708 0.5453842361253540  
0.7348478420908153 0.4389689597241119 0.0595026309039969  
0.8975472916409604 0.9403456440809759 0.5612269556724266  
0.9020228171837423 0.5558422638459530 0.5654578548104852  
0.7321739818525560 0.9407826857703232 0.9455329165642894  
0.9400765777020492 0.4342732245251764 0.0470781173779371  
0.7782238904842752 0.0477175018677475 0.4364748463315981  
0.4789730198724705 0.2963838522736557 0.5012170488636182  
0.3991904698882660 0.3244723969657478 0.5353063208476536  
0.5724157436285775 0.2698575401116362 0.5057466334722817  
0.5293963043829495 0.2178846149737342 0.4393470171578929  
0.4217630088224286 0.2362956647546931 0.2434966690305314  
0.5894796104284181 0.2410844809710075 0.2405277728030399

Structure TS8 S=4

1.0000000000000000  
20.9172000884999996 0.0000000000000000 0.0000000000000000  
0.0000000000000000 17.8076000213999990 0.0000000000000000  
0.0000000000000000 0.0000000000000000 12.2158002853000003

Al O C H Fe

10 63 97 64 2

Selective dynamics

Direct

0.0845671405998871 0.2482710954569853 0.2540463542131803 F F F  
0.2501038702610501 0.7530771460171763 0.7627256690018100 F F F  
0.2481229708379615 0.2516370257417506 0.2540503300613324 F F F  
0.0844955697952443 0.7508895821605819 0.7572926835002676 F F F  
0.5857765609375392 0.7433264760135003 0.7411479450216447 F F F  
0.4173511953539233 0.7468910495455603 0.7473873400096096 F F F  
0.7570755473387862 0.2459910478221516 0.2490989326334727 F F F  
0.9187761793351328 0.7469858500314501 0.7525266112743907 F F F  
0.9206987198247205 0.2475778734690692 0.2522633683676361 F F F  
0.7526896544954482 0.7443298265907714 0.7499628766995770 F F F  
0.6752174606395442 0.2474800348179045 0.1786228987347016 F F F  
0.8360575208005301 0.7454397142007494 0.6858374772675688 F F F  
0.0012216615351477 0.7482068168772074 0.8205525641282421 F F F  
0.8383719909804199 0.2468531786744563 0.3165451663172973 F F F  
0.7850489551073352 0.1671962805898417 0.1494819713292230 F F F  
0.9497700489225949 0.6689184133168098 0.6516904210993033 F F F  
0.8917069098359391 0.3265561260482599 0.1512767898744798 F F F  
0.7257280651228157 0.8221804713736418 0.6455570539272486 F F F  
0.778989959579538 0.8257046023393855 0.8512663447143254 F F F  
0.9484863181214180 0.3290348142623216 0.3512441568245350 F F F  
0.8912972910030490 0.6665205502031597 0.8505945853000014 F F F  
0.7286811958521966 0.1653488252324280 0.3472069048241551 F F F  
0.8877440586241434 0.8246428156736911 0.8537608826025576 F F F  
0.7284180426565499 0.3257305490155460 0.3493115014552259 F F F  
0.7826618855413656 0.6660310957240441 0.8500698231388952 F F F  
0.9468667378452409 0.1692540550359851 0.3556698732618528 F F F  
0.8936060982609746 0.1665906832399884 0.1497112944678634 F F F

0.7243960556390832 0.6644059703658129 0.6516230973921608 F F F  
 0.7833372179785982 0.3260135087394147 0.1499422036769289 F F F  
 0.9458329768037146 0.8277177820678716 0.6548152220037835 F F F  
 0.3331786143310183 0.2603885605474190 0.1962094320841672 F F F  
 0.5009629917155891 0.7454302858844741 0.6773770244523334 F F F  
 0.6688016692733356 0.7442665381350935 0.8113182643199863 F F F  
 0.4173498021502864 0.3238280961720391 0.3692501166958299 T T T  
 0.4518198108634337 0.1593630166644644 0.1335886573193790 F F F  
 0.6157287006472529 0.6647675036474325 0.6451537420132567 F F F  
 0.5648445838850407 0.3298709592943609 0.1454672533434334 F F F  
 0.3880177164597356 0.8298778291070121 0.6555092328623928 F F F  
 0.4508428823823962 0.8203900020515320 0.8474732649176318 F F F  
 0.6205452589518998 0.3178199438368239 0.3684415079613146 F F F  
 0.5548516597480955 0.6654594939154563 0.8401365099179543 F F F  
 0.3886982763384665 0.1623770244549476 0.3512824633369789 F F F  
 0.5595081796171897 0.8221202924221913 0.8396066723428177 F F F  
 0.3302156817691255 0.4041800203028245 0.2350434962523735 F F F  
 0.4459509581989209 0.6637081760688588 0.8411761131736526 F F F  
 0.6208209530797575 0.1537597222031195 0.3325816005351427 F F F  
 0.5604776752033729 0.1646209278376034 0.1207019798151379 F F F  
 0.3829887331279735 0.6746542302156584 0.6433510417420152 F F F  
 0.4560242098633225 0.3292130931770458 0.1504218275333145 F F F  
 0.6168261572355291 0.8222004002911447 0.6399645044272475 F F F  
 0.0024327504486976 0.2467856823223755 0.1878712075235782 F F F  
 0.1671858852415156 0.7523500204416891 0.6942764983696463 F F F  
 0.3354027833492950 0.7486187777570663 0.8217336457009168 F F F  
 0.1659440140686570 0.2492854046564332 0.3212913805558486 F F F  
 0.1148314879226078 0.1704344205329278 0.1557671438454236 F F F  
 0.2743163708082221 0.6767586421670018 0.6595246863523059 F F F  
 0.2177723465401016 0.3235733858581327 0.1429838022104022 F F F  
 0.0543389438752655 0.8298928094643401 0.6587355571833200 F F F  
 0.1126849367115668 0.8306053750379547 0.8573938573457340 F F F  
 0.2645305014089701 0.3396306369642517 0.3490205781784468 F F F  
 0.2213914986249534 0.6720668818305882 0.8625827778956960 F F F  
 0.0554349580553009 0.1675154536919834 0.3539591706192979 F F F  
 0.2213328367059191 0.8296772658188942 0.8613628435343657 F F F  
 0.0568434565001894 0.3271649677684039 0.3548285238457680 F F F  
 0.1125610593305595 0.6713102640214714 0.8590346697917468 F F F  
 0.2804992262376587 0.1738785688018822 0.3603945609112742 F F F  
 0.2233462346301778 0.1670063588903048 0.1635536956561907 F F F  
 0.0585051108814980 0.6700643574058347 0.6534025435074113 F F F  
 0.1096196842632722 0.3290751443230917 0.1525193338020969 F F F  
 0.2794873351645109 0.8332232395226953 0.6655310519896389 F F F  
 0.5150216227966933 0.2321626273720681 0.2982350576042527 T T T  
 0.4619540692739642 0.4073196243133558 0.4952425078576338 T T T  
 0.5337406218186960 0.2389696515843338 0.5118473231993610 T T T  
 0.4390071337386793 0.3418258303625050 0.4805292076493972 T T T  
 0.16914577077465657 0.1405706693993949 0.1344480060361875 F F F  
 0.3268054307824357 0.6497211011534674 0.6235492469981523 F F F  
 0.1641295280687700 0.3549447808639528 0.1232295281755285 F F F  
 0.3334530241242391 0.8595759327562362 0.6355206215978058 F F F  
 0.1667719403927066 0.8582107505727166 0.8846920657047193 F F F  
 0.0026637809058272 0.3566878019125781 0.3780952315495085 F F F  
 0.1668760831724896 0.6430455301435671 0.8849480438070714 F F F  
 0.0011948077675115 0.1401590502941872 0.3801242262325033 F F F  
 0.1686722053323777 0.0679820076217510 0.0695824698976395 F F F  
 0.3202579401480605 0.5829509275881648 0.5493913875885355 F F F  
 0.1649413170728806 0.4288245931322621 0.0607133276063436 F F F  
 0.0001406395438650 0.9297779946109372 0.5661050120854512 F F F  
 0.1671889102237927 0.9306747921598770 0.9499255177462160 F F F  
 0.3046236994239280 0.4608986404671711 0.4043721198441688 F F F  
 0.1663355450126218 0.5689452303516518 0.9468703716590525 F F F  
 0.0006958479517891 0.0673692325003614 0.4455059353902016 F F F  
 0.1106934834252797 0.0332341442920949 0.0404274533365125 F F F  
 0.2676723594804642 0.5342523515894513 0.5595917277735012 F F F  
 0.2228468859558106 0.4656853362262083 0.0370232614078461 F F F  
 0.0578274379927208 0.9641058076287763 0.5341326114253562 F F F  
 0.1099248931561405 0.9658997654333348 0.9816362030066443 F F F  
 0.2609489371226204 0.4726226503834781 0.4898435199393703 F F F  
 0.2234153992276262 0.5343396292816109 0.9812617006083002 F F F  
 0.0580941193621101 0.0314152873071691 0.4750446704797255 F F F  
 0.2251840725967469 0.9654312283671374 0.9790619659763493 F F F  
 0.0609271653644115 0.4671574532605547 0.4668694036931953 F F F  
 0.1085046875167421 0.5319457933863916 0.9707851427150018 F F F  
 0.2745286256828621 0.0355617305612768 0.4843442508460640 F F F  
 0.2259455567336701 0.0327903657491007 0.0378006799450930 F F F  
 0.0615677223125317 0.5347119629734749 0.5255041806922023 F F F  
 0.1078150731463694 0.4634542584103656 0.0267506458453326 F F F  
 0.2750215793860917 0.9685188755594254 0.5440826561136873 F F F  
 0.5065092138339296 0.1336428160373941 0.1037514812445153 F F F  
 0.6706379948509920 0.6363464844994979 0.6237143838228647 F F F  
 0.5095599435034970 0.3573388877396866 0.1220214247261779 F F F  
 0.671681195454984 0.8499402316040872 0.6174188945072743 F F F  
 0.5053277467051842 0.8494436952081088 0.8676423566930112 F F F  
 0.2989060226353644 0.3974661830884259 0.3229168686590356 F F F  
 0.5009374438765448 0.6367009024352583 0.8657009754842804 F F F  
 0.3327701769843756 0.1404293988203449 0.3817659553654025 F F F  
 0.5061169571782571 0.0603912568174536 0.0425039815445274 F F F  
 0.6717250757204383 0.5632839533749632 0.5600593584783837 F F F  
 0.5079334649282288 0.4291849631274332 0.0552856793780307 F F F  
 0.3327921372317419 0.9321411663852928 0.5702480328417323 F F F  
 0.5058298930903931 0.9222932843362699 0.9297502346942963 F F F

0.6738549226614978 0.4246845991613455 0.4441003579946994 F F F  
0.5028604102243008 0.5644793021630363 0.9316092151549071 F F F  
0.3319090732875551 0.0685791583032653 0.4485919106054865 F F F  
0.4482992096482690 0.0232380965638939 0.0203779349031024 F F F  
0.6147199717185217 0.5252331055191846 0.5346244411298855 F F F  
0.5642811508506256 0.4650400893754707 0.0203725751789818 F F F  
0.3901363142377576 0.9654180630624865 0.5348627966151867 F F F  
0.4481838574021921 0.9549859600119888 0.9646084275902496 F F F  
0.6157598626471241 0.4571740321998234 0.4777694892892299 F F F  
0.5617657489444241 0.5314904674697800 0.9597576046379785 F F F  
0.3896900381696184 0.0322610930065395 0.4751536939676981 F F F  
0.5635880735942109 0.9596531780915001 0.9516970118378438 F F F  
0.3564201403490586 0.5106235383975317 0.3935059372854326 F F F  
0.4465758176094354 0.5283392731018779 0.9660385246135448 F F F  
0.6174664177650016 0.0257598446166440 0.4618078550711644 F F F  
0.5637806119498023 0.0278969202392290 0.0074535080469218 F F F  
0.3653808201704365 0.5694230065027597 0.4669559586068033 F F F  
0.4489516871967396 0.4620151947499238 0.0271113814775106 F F F  
0.6162246539932710 0.9587688862499277 0.5211684723843248 F F F  
0.8392027398422428 0.1384836085427281 0.1245845201849463 F F F  
0.0044119283438349 0.6412815846121731 0.6273714144597591 F F F  
0.8376859708829798 0.3547227520306180 0.1252228193791041 F F F  
0.0001468162220917 0.8570600306423870 0.6314345772483136 F F F  
0.8335303577906714 0.8534905438826428 0.8773338071830139 F F F  
0.6745680939494250 0.3508113824300381 0.3823452562736591 F F F  
0.8369485707744886 0.6381007795927047 0.8755200938435053 F F F  
0.6757528621860800 0.1315056643001071 0.3650185232646308 F F F  
0.8379613884726140 0.0653049354893227 0.0601634811291163 F F F  
0.0044927045054237 0.5681659725768071 0.5622676856807587 F F F  
0.8374591029885536 0.4274954359234400 0.0603137597579462 F F F  
0.6731858121300007 0.9223564386425025 0.5515479054391363 F F F  
0.8345207582405294 0.9268106358728829 0.9416353556390931 F F F  
0.0032580428067917 0.4298784873474091 0.4425864134375530 F F F  
0.8371740737829896 0.5652860660772063 0.9405869001544431 F F F  
0.6757151932412597 0.0591501732731388 0.4305662997346005 F F F  
0.7795926897136880 0.0325923187010417 0.0280415571877128 F F F  
0.9468062087096385 0.5310149121803747 0.5375960425929591 F F F  
0.8949247236402940 0.4614422357090291 0.0265268495734290 F F F  
0.7313860066441578 0.9557672851668073 0.5203863900175918 F F F  
0.7779270154201825 0.9648561050993010 0.9700059126594809 F F F  
0.9461807737346106 0.4634478776973836 0.4790787894025286 F F F  
0.8947487174534672 0.5288725582814990 0.9677861310199702 F F F  
0.7327134834653748 0.02229039466836696 0.4609593976090025 F F F  
0.8928730490599008 0.9595841531845792 0.9737096195878934 F F F  
0.7309104409637541 0.4629037653483863 0.4690240309708926 F F F  
0.7797062387042004 0.5314242801147842 0.9745248554487418 F F F  
0.9430405244696303 0.0330633306123431 0.4775672349549822 F F F  
0.8945662800362513 0.0273091311274172 0.0317388304049189 F F F  
0.7298462186819705 0.5308429040690470 0.5262687716260501 F F F  
0.7798910851123750 0.4639921732271546 0.0332244874492389 F F F  
0.9427495234617851 0.9657521952680099 0.5366469038351127 F F F  
0.0029465495681009 0.2371288622267258 0.1097078859121083 F F F  
0.1688624279003577 0.7272648156438564 0.6236798300042281 F F F  
0.3375692772437660 0.7295161483553656 0.8961018126959459 F F F  
0.1660611268569809 0.2790628500284029 0.3880159946853894 F F F  
0.0659429908849773 0.0598334469961586 0.0649507624398922 F F F  
0.1027980473735539 0.9370748662892865 0.5564500771480994 F F F  
0.221149893777918 0.4336459873599168 0.5002770194053454 F F F  
0.2687728119044266 0.5621418366466813 0.9637737179399437 F F F  
0.2699169633394263 0.9387980152214155 0.9545178021917522 F F F  
0.1057899241567100 0.4427696497509643 0.4383420290947058 F F F  
0.06374222297773890 0.5577172361661411 0.9445118633239460 F F F  
0.2293925902625773 0.0631428558518792 0.4644570953162770 F F F  
0.2712539483134435 0.0591960077734299 0.0596987717333590 F F F  
0.1069868017911162 0.5623598377804697 0.5431033631225262 F F F  
0.062530062251029 0.4357706263133423 0.0451514121869963 F F F  
0.2302347714091582 0.9433303832326416 0.5714568922339680 F F F  
0.2325284930796414 0.5448184801849223 0.6237972271952756 F F F  
0.0646046284004527 0.9396839580941432 0.9593515033563804 F F F  
0.2675293824352707 0.4403309933639861 0.0646047055106251 F F F  
0.1032626219782173 0.0571485155051263 0.4507205477578609 F F F  
0.3349566177677445 0.3165611112178652 0.1855422818965948 F F F  
0.4997203325802744 0.7419039372242153 0.5981442654563409 F F F  
0.6669629477096422 0.7669222903934880 0.8836002856661338 F F F  
0.4206235726668583 0.3704748788570835 0.3263983716646902 T T T  
0.4036163537245372 0.0487680809220379 0.0474939763587727 F F F  
0.4352808907601542 0.9380027888398814 0.5550065594600326 F F F  
0.5706156683972097 0.4293104389197211 0.4590895250438649 F F F  
0.6057309460786584 0.5589162351249470 0.9330883133414360 F F F  
0.6082274904247242 0.9345105128030937 0.9236822528660866 F F F  
0.3898924773042580 0.5023990609870310 0.3261194966553731 F F F  
0.4005192616094817 0.5528501573875815 0.9440818535549198 F F F  
0.5728355402256256 0.0532608781826411 0.4388368769883186 F F F  
0.6085011704756127 0.0571415112259288 0.0245873658598441 F F F  
0.4068386130742567 0.6062365261546745 0.4598696814968974 F F F  
0.4048960810255124 0.4350725105729225 0.0544101179701215 F F F  
0.5707068029336995 0.9337879359609005 0.5451933159176008 F F F  
0.5691430161423909 0.5492007260713478 0.5603930101718788 F F F  
0.4034237174953716 0.9260185547789774 0.9468329603694698 F F F  
0.6103812596480793 0.4403150774606530 0.0415339790271645 F F F  
0.4345737797226050 0.0572476525498828 0.4479328177223110 F F F  
0.6740115420092607 0.2823349620609861 0.1171178655274190 F F F

0.8361790707835368 0.7621874967759084 0.6101948364009004 F F F  
0.0008245791017885 0.7291174136641345 0.8950250462005016 F F F  
0.8385293213101193 0.2310898898976461 0.3926084603367741 F F F  
0.7351951286954872 0.0612484605947330 0.0494070766665757 F F F  
0.7759858128429684 0.9283152281386080 0.5436325266788558 F F F  
0.9008949835863262 0.4356839727487625 0.4608803728879209 F F F  
0.9397866369776082 0.5541218008221094 0.9418126713973081 F F F  
0.9372665138821645 0.9309743405769098 0.9522263043726085 F F F  
0.7762489324523685 0.4385140016012485 0.4427328309399030 F F F  
0.7346035350497289 0.5588769750200484 0.9541731584119333 F F F  
0.8980246881970970 0.0599921435524209 0.4553192826075474 F F F  
0.9403382356937584 0.0515132743979123 0.0561096275253945 F F F  
0.7744071484997761 0.5597887935514692 0.5456631815179733 F F F  
0.7348234469724346 0.4389401262052388 0.0594410314723319 F F F  
0.8975153278421431 0.9403104661233073 0.5612195711534724 F F F  
0.9020240776332997 0.5559763247144787 0.5654592890957133 F F F  
0.7321461145008641 0.9406746075864731 0.9456622118753515 F F F  
0.9400521604301204 0.4341717580191755 0.0472049934326222 F F F  
0.7782917885050082 0.0477691804156990 0.4369473119267084 F F F  
0.4811286547069932 0.2952065444015802 0.5015845315627540 T T T  
0.4002143846332534 0.3212870228894921 0.5361152236784307 T T T  
0.5711798365305681 0.2718677005776412 0.5013034699549944 T T T  
0.5270500380457025 0.2209873733273851 0.4345033300115749 T T T  
0.4217054942221525 0.2360426550076180 0.2429449110000697 T T T  
0.5894096437388646 0.2406809523970624 0.2404546635723172 T T T

Structure 14 S=5

1.0000000000000000  
20.9172000884999996 0.0000000000000000 0.0000000000000000  
0.0000000000000000 17.8076000213999990 0.0000000000000000  
0.0000000000000000 0.0000000000000000 12.2158002853000003

Al O C H Fe  
10 63 97 64 2

Direct

0.0835985447508738 0.2484211277380319 0.2545036410214662  
0.2496716387978974 0.7536845952398022 0.7634464995750394  
0.2457561591615891 0.2512194610904654 0.2537250315201194  
0.0840793957062577 0.7514194451360162 0.7575000483010692  
0.5858846837205074 0.7413135164259878 0.7393811493945445  
0.4170087730794580 0.7461146904592790 0.7450550002700203  
0.7587532367907028 0.2447697814593203 0.2504257302903292  
0.9186067377109729 0.7473973015496375 0.7527183019364199  
0.9210614611627713 0.2476149630066380 0.2523343542150656  
0.7527024150665580 0.7436268474343050 0.7503525819467611  
0.6790740205645244 0.2491993262102250 0.1765534235647567  
0.8360233572790603 0.7455814511450165 0.6861903520277124  
0.0009336994996520 0.7487177356593866 0.8209302578749408  
0.8395247265013649 0.2465820904273146 0.3171298311024182  
0.786385506971661 0.1664131791344632 0.1508942221880029  
0.9496454301932294 0.6696674600451603 0.6516459444360455  
0.8933620654232749 0.326825112442254 0.1510446368707127  
0.7252962300895325 0.8204525568327957 0.6457610902469949  
0.7785548490059564 0.8256183399845550 0.8514625861245846  
0.9482200576891344 0.3291334041077602 0.3525251413304261  
0.8915522044247705 0.6668461554949938 0.8507370298433340  
0.7303770972610558 0.1633615782149119 0.3482819389524001  
0.8873225034087692 0.8244491183699704 0.8540537322111731  
0.7303072952089023 0.3231994000750138 0.3524946490037782  
0.7829293181377160 0.6662256893766577 0.8509547084625789  
0.9470028798988124 0.1694308561324015 0.3558956079606027  
0.8947579033875520 0.1662990283065031 0.1498042838514967  
0.7255636095696466 0.6630642360392186 0.6524956754167632  
0.7851380974115884 0.3263484496955261 0.1514531361461938  
0.9455234627588969 0.8284144044905383 0.6555913623037546  
0.3304343453331849 0.2591385754880400 0.1944926432320322  
0.5008060042355003 0.7439472282330649 0.6751809439500479  
0.6686931793394005 0.7428188581246470 0.8109360054162601  
0.4138630176605252 0.3347671332312313 0.3527496632101020  
0.4484123201095109 0.1571490237631483 0.1258641262043698  
0.6169176353219481 0.6625976967307600 0.6450923790901884  
0.5617350003686102 0.3308139251193578 0.1459369711662658  
0.3880581682706348 0.8304935078475008 0.6554820160873736  
0.4512436269687096 0.8179619430939986 0.8465115179520762  
0.6226284081288087 0.3139188922732697 0.3706465834068980  
0.5540848287234560 0.6641901163774590 0.8380562474474227  
0.3855567726821729 0.1610562308813310 0.3450307478444537  
0.5598837616457774 0.8201299247609897 0.8381414520014997  
0.3283203033542948 0.4046132236784933 0.2351936868027041  
0.4451320522981474 0.6623395233192088 0.8369892543278491  
0.6240302400369423 0.1482778475972302 0.3220361615710827  
0.5568509148033307 0.1649276447689964 0.1163325211125382  
0.3812256272347002 0.6756136889938266 0.6398814564375396  
0.4535925403132229 0.3231472935655848 0.1371448148742740  
0.6164261589819188 0.8198469444671275 0.6385089829638559  
0.0022976684010771 0.2469781132837865 0.1881754458162799  
0.1667605912212838 0.7532164273479153 0.6948496594863171  
0.3352669383136417 0.7482278309455052 0.8210208176397717  
0.1646168420693066 0.2495780903927458 0.3213385889205952  
0.1135060534158018 0.1704949739315780 0.1555427302858267  
0.2727245141794514 0.6776263819476469 0.6600660406777333  
0.2163914455059917 0.3230846062575281 0.1414536476283232  
0.0540170280091696 0.8305130990576709 0.6593656323402388

0.1123450483201892 0.8307811389318460 0.8578296512251483  
0.2600851925402621 0.3423317946061292 0.3466195924270090  
0.2208608050295619 0.6724937486640526 0.8632858003194835  
0.0554410483451963 0.1677835456892874 0.3544503622983078  
0.2210280291066331 0.8299512560286600 0.8622997502041634  
0.0565097601722696 0.3276380770438317 0.3553691963673355  
0.1120255595412726 0.6718604918157891 0.8594973223518092  
0.2780487403727263 0.1749788028726202 0.3617372618203585  
0.2219024936790751 0.1665865933738628 0.1640304257361612  
0.0583569178030609 0.6705802688820138 0.6537251054866253  
0.1083989481782639 0.3294694923239549 0.1523026966412767  
0.2795475295268658 0.8339034320606743 0.6668029886210927  
0.5067271012819436 0.2278036889186849 0.3070364686574324  
0.4702349403122852 0.4316593093526706 0.4242874281077693  
0.5527974117187497 0.2267875763261454 0.5207397861093060  
0.4577802092036021 0.3651059329309509 0.4210852690438909  
0.1676581296811659 0.1403403508710855 0.1345302978347382  
0.3247592919514776 0.6511389295847841 0.6214415761965721  
0.1628548395890790 0.3550726680448082 0.1224772538518096  
0.3334192712482819 0.8603665259872245 0.6365894667258056  
0.1663623943037251 0.8583627931338690 0.8853395851443537  
0.0023284137321277 0.3570566513378797 0.3790626555444241  
0.1663030684734838 0.6435850815002686 0.8855360605349927  
0.0012070327612126 0.1404054534307106 0.3807193264628677  
0.1673534626867559 0.0678680230398471 0.0698142148337013  
0.3166703741327133 0.5856487536895419 0.5456059781363896  
0.1638672726461316 0.4291248719784656 0.0605573235991029  
0.999906660843962 0.9304949802565021 0.5671348970346552  
0.1665197648749508 0.9307398211982130 0.9504717898875192  
0.2983322775901313 0.4651654161051869 0.3996097498229297  
0.1655721174067800 0.5694776148752171 0.9474543805568578  
0.0006308294538270 0.0678663937796914 0.4464304172288963  
0.1094895964036329 0.0330129139915344 0.0404296831127126  
0.2677359371342705 0.5328842709760526 0.5638176478425818  
0.2218665127468258 0.4656752425811839 0.0365409094118775  
0.0576702986992798 0.9647447021469600 0.5353697261185224  
0.1090564698231018 0.9656712543844855 0.9817317904976715  
0.2598091660375587 0.4720639949477617 0.4931602617519778  
0.2225836041672673 0.5344822623591491 0.9812279077420458  
0.0580079551616014 0.0319891430379371 0.4761841213518673  
0.2243920785047098 0.9656476477537835 0.9797903975191375  
0.0606289310009568 0.4673468870093847 0.4679982325185760  
0.1076381748971456 0.5328471035692870 0.9718017686692908  
0.2730823718083529 0.0364486808388437 0.4873045348004681  
0.2248282878075802 0.0329846602210678 0.0384518182046825  
0.0613502794524430 0.5349654223607396 0.5264636906254440  
0.1067878441040155 0.4642551155347064 0.0274683132039693  
0.2743107486391153 0.9695522229360874 0.5474131077677431  
0.5038841605622995 0.1322719996420372 0.0979531575625160  
0.6720651307450289 0.6343307079907394 0.6246884861406091  
0.5067202166002001 0.3554051373826145 0.1161095734933575  
0.6713077116786600 0.8478008893216269 0.6166375252554118  
0.5056790081502256 0.8470194517108695 0.8663912151726998  
0.2938759185519816 0.4002322698327129 0.3211912306482907  
0.4999920990020425 0.6355701151019747 0.8626960060875120  
0.3302357182819472 0.1405853731092640 0.3806081031306779  
0.5046968847372919 0.0586045987819664 0.0383192442913327  
0.6737148412540949 0.5606860793052455 0.5626145257690599  
0.5048719942962713 0.4278664684773084 0.0512394242094793  
0.3323720529842984 0.9332964897525414 0.5720830379705929  
0.5058756850005861 0.9198519352504145 0.9283431340006730  
0.6758660834505790 0.4212226347242496 0.4485386221354011  
0.5013342144034905 0.5635894009572009 0.9289543066328464  
0.3300275383873242 0.0694863336516804 0.4493810740782480  
0.4472190794712461 0.0205912791300670 0.0166163708622957  
0.6168562810497253 0.5223695363578239 0.5377962219158615  
0.5616138297773160 0.4645547311749539 0.0202789857008857  
0.3893091248463270 0.9668593034609839 0.5353754668787046  
0.4478322900031980 0.9519372138567490 0.9622044826340019  
0.6179356659413364 0.4538847583662761 0.4820721443061911  
0.5599332122950152 0.5311493648544463 0.9600792116381083  
0.3881254068526001 0.0334876671760010 0.4750563707813905  
0.5633536440706661 0.9577451925107480 0.9502923714861449  
0.3457457687946784 0.5195286210012328 0.3801725339005427  
0.4446182001964589 0.5270313335515705 0.9602270029005506  
0.6186486134102371 0.0229217396771626 0.4577923925979812  
0.5628327751781140 0.0264671382771915 0.0048456177180941  
0.3561614108639238 0.5777917330534120 0.4538797759593144  
0.4462509965491380 0.4603384875235086 0.0204505346570526  
0.6165951948595583 0.9562580916641418 0.5178914578484439  
0.8404468038132047 0.1378569841509354 0.1252658957873538  
0.004257959795036 0.6418711809045846 0.6275591623250228  
0.8392105242693899 0.3551238879853477 0.1258236289159641  
0.9998300614098898 0.8577489976539822 0.6322378831853660  
0.8331153644066894 0.8532877981902884 0.8775992170137908  
0.6763380206510003 0.3475976319951182 0.3860542580144780  
0.8373058080929074 0.6383747237977612 0.8759788754286837  
0.6777886794288072 0.1277587904120262 0.3616556127309472  
0.8388204585025257 0.0648182403381621 0.0607606638931162  
0.0042862825317692 0.5687048215301233 0.5626816623621286  
0.8387051723428294 0.4278912670428556 0.0608025340967005  
0.6731620770909424 0.9199079738006900 0.5503568063198406



0.8343674538319106 0.9265067797081890 0.9420480461055415  
0.0029012496014037 0.4302913366627851 0.4434142896600651  
0.8377447529324796 0.5656227023511151 0.9409547740515266  
0.6772989023949708 0.0560214237897403 0.4283380784062604  
0.7801906536937369 0.0322984072898620 0.0295960253338643  
0.9465272708602848 0.5317874237557279 0.5377376372005385  
0.8959769711059263 0.4620977657719831 0.0265939191143987  
0.7317888211135185 0.9531173148251268 0.5210974707660482  
0.7780049728843041 0.9646458351693176 0.9714254819544824  
0.9458275731863354 0.4641456131096785 0.4794125556299424  
0.8954869330123755 0.5295080548103041 0.9678223840803627  
0.7339351771961664 0.0199963404613910 0.4612687349133413  
0.8929667409576764 0.9590180054555628 0.9733124668353933  
0.7329792510336010 0.4596755373932633 0.4729329854348310  
0.7804374832546527 0.5315526888392530 0.9751929941675463  
0.9429013963114221 0.0337173623164428 0.4784241894087398  
0.8951576908149640 0.0266900160802996 0.0313832299528615  
0.7318943553640767 0.5279811743353641 0.5293200173437174  
0.7809888925142741 0.4641515990025190 0.0339634047537100  
0.9425428759043303 0.9664699038984561 0.5376142505215381  
0.0027808335621798 0.2409870695052724 0.1092702952448626  
0.1686102102421708 0.7272321357204857 0.6249432211117601  
0.3378756338809046 0.7287568871247447 0.8951419668849582  
0.1647057902447877 0.2803424013396866 0.3871167864324370  
0.0646409322422502 0.0594929731955976 0.0647209393384917  
0.1025976295295716 0.9376804175399877 0.5578373783955913  
0.2236384430700868 0.4294243708906362 0.5098806021434253  
0.2679933775326829 0.5620996166320260 0.9635714647730234  
0.2692273940214833 0.9391551992982033 0.9555050286774665  
0.1054901319357414 0.4427227326554379 0.4399183821718636  
0.0629296047486279 0.5590016000053152 0.9461044962797209  
0.2276317192637859 0.0637121699802180 0.4686490815503717  
0.2699627716479280 0.0596462531643198 0.0607008899136758  
0.1068326436003688 0.5623882818631397 0.5443401057659486  
0.0614242086983449 0.4368794346852888 0.0462957709180389  
0.2298710855381354 0.9442210757863349 0.5761411918480671  
0.2368129240690835 0.5394565070840103 0.6351358995426400  
0.0639110572905788 0.9391659951470941 0.9591635498807946  
0.2665434174523606 0.4399923383650815 0.0634483607425817  
0.1031671017446256 0.0577515746210974 0.4518666027689620  
0.3318178958379627 0.3143354773978113 0.1785366224788678  
0.4998295606409093 0.7425558997566390 0.5957851952958411  
0.6663334393109795 0.7659781047225900 0.8828152042494378  
0.3929286308046378 0.3741247991081877 0.3047446075542764  
0.4022571293311349 0.0458248452424672 0.0428216058729252  
0.4347600615622613 0.9398234838542394 0.5546654720451012  
0.5727532924268040 0.4266644039515520 0.4627806925873715  
0.6042342935977195 0.5589441193233236 0.9360654765441482  
0.6082135786026356 0.9327123329704593 0.9230839314011529  
0.3754635984711551 0.5144581917740086 0.3073933260019222  
0.3989450759522889 0.5515181437762562 0.9360561156352860  
0.5745600445808887 0.0507912006131061 0.4329999045488595  
0.6072170310086410 0.0563467152362846 0.0221370369780975  
0.3945806010104015 0.6181236335763822 0.4401478221639018  
0.4019636390686189 0.4327656227123640 0.0448813279854677  
0.5707576291016883 0.9316330283814028 0.5407591668907588  
0.5712213904788523 0.5466682837676042 0.5625137082297400  
0.4034432685698537 0.9221854325629902 0.9444272553167585  
0.6072847909550549 0.4400248826996718 0.0443044505899079  
0.4327018030478694 0.0585197139123106 0.4465659248972670  
0.6810958157877418 0.2856795662247533 0.1172317265728911  
0.8359822902609261 0.7614797066634921 0.6101713361670332  
0.0005693458347528 0.7286835772006529 0.8948770498847149  
0.8400202656584107 0.2365036538814023 0.3951630178304830  
0.7360025797483070 0.0610481132632755 0.0519080217719477  
0.7758856893219028 0.9254869332273368 0.5464942664576201  
0.9004805844807965 0.4365963031279862 0.4609647504784717  
0.9403618139471510 0.5550055635908031 0.9414752368728928  
0.9371453522668106 0.9302245360273014 0.9510687792960569  
0.7783428958751397 0.4353467482126190 0.4466191368575836  
0.7352177201044506 0.5588194970022057 0.9549778348385372  
0.8979436103311053 0.0607152600298420 0.4559922176158635  
0.9410889165642666 0.0507535708551237 0.0550845982649112  
0.7764413478584017 0.5571141247432428 0.5481299101463422  
0.7360446213271624 0.4389677233851348 0.0604740699808130  
0.8972878311550716 0.9410622023237014 0.5621408462680595  
0.9017666879263766 0.5570086740020754 0.5651973152513119  
0.7320375993719478 0.9405968188341572 0.9477621615281185  
0.9412206499313160 0.4350481758445688 0.0470082052630295  
0.7798156511518884 0.0447606584662276 0.4388858029876188  
0.4796898800346525 0.3212139496310700 0.4726890331737829  
0.5540847051053928 0.2350842565587852 0.5993003413404075  
0.5843846111066087 0.2609843174699469 0.4874477702922652  
0.5091778541013294 0.2140916398143815 0.3850163548936420  
0.4204214614462818 0.2329173151826898 0.2336113286206515  
0.5910594263588751 0.2385073411227262 0.2355512546704236

Structure 15 S=4  
1.0000000000000000  
20.9172000884999996 0.0000000000000000 0.0000000000000000  
0.0000000000000000 17.8076000213999990 0.0000000000000000  
0.0000000000000000 0.0000000000000000 12.2158002853000003

Al O C H Fe  
10 64 97 64 2

Direct

0.0819484906413109 0.2466989828578519 0.2545942316249730  
0.2497729995910532 0.7516418504857439 0.7625447471634987  
0.2436635782344146 0.2501559685644292 0.2531956409610702  
0.0843372242559604 0.7510363101546863 0.7575730090002442  
0.5864249902912223 0.7434142977343895 0.7428592989878596  
0.4170234781687157 0.7438723290473459 0.7443780190518420  
0.7574448805482865 0.2503728325130837 0.2479738534479901  
0.9190698785898380 0.7499153566150265 0.7563970125534594  
0.9195691231187243 0.2465060334576385 0.2540849409062044  
0.7534043980138400 0.7511586219413872 0.7585741099115829  
0.6748591332147511 0.2516076686203052 0.1787565178037302  
0.8365809751632476 0.7515321673034825 0.6924679424740604  
0.0016560995625531 0.7493578795605801 0.8226366257850335  
0.8380692157816162 0.2477356698898646 0.3186600071683497  
0.7818390018181172 0.1650125565226272 0.1615936832354135  
0.9486516548660944 0.6706270845937524 0.6533556377736000  
0.8953262608829105 0.3282005531686037 0.1509883507980706  
0.7252465233439250 0.8318795033928321 0.6573438339658956  
0.7801389277967945 0.8280149121739974 0.8597386914437692  
0.9467483538872169 0.3277887303903178 0.3577637347590774  
0.8920625596622582 0.6695775169987136 0.8544481154754879  
0.7204244657312364 0.1740837314539222 0.3545949098763835  
0.8889436807509877 0.8277585709845344 0.8589204491747080  
0.7420311749923624 0.3360745440242725 0.3475869555103512  
0.7833889058100104 0.6699273461370761 0.8568550869309461  
0.9467128778536894 0.1669816608279814 0.3524390942530061  
0.8901856299532043 0.1681954767679050 0.1545547970786278  
0.7278654053109569 0.6762714723614051 0.6571487402478998  
0.7872931079654841 0.3230212350026933 0.1396588722527558  
0.9467471346922524 0.8297470024738521 0.6587934779605381  
0.3283203136212690 0.2585611824670262 0.1926903794869494  
0.5014331132710342 0.7441268180035678 0.6763159623131312  
0.6685434063615424 0.7468939827562034 0.8171692034819874  
0.4188313241634889 0.3277548786566067 0.3523452350944425  
0.4473603575566740 0.1580280948524492 0.1160095151063320  
0.6193983221679320 0.6692740830109256 0.6457467676771461  
0.5578118746705335 0.3203446966133512 0.1315764963724731  
0.3874650402580683 0.8282914837228029 0.6536005249987658  
0.4488225941027844 0.8163359221094293 0.8457510627806346  
0.6717088490564866 0.4013542609656439 0.2442597455057176  
0.5549727938248481 0.6622533473039869 0.8387172751574340  
0.3839616444050026 0.1560552731407862 0.3372406123547307  
0.5575416464553580 0.8185145007632617 0.8416730340260957  
0.3304114332137597 0.4003410968485548 0.2377503402362722  
0.4459638063460420 0.6601060049568233 0.8364111998719165  
0.6155321615411816 0.1472489665754241 0.3169656219782551  
0.5570036889784673 0.1607528920234096 0.1104150372791014  
0.3820523756445712 0.6733707060028997 0.6395661453606524  
0.4491288675983086 0.3212706984369644 0.134895614809312  
0.6166401389677016 0.8257026482865425 0.6448402588813075  
0.0008629066295462 0.2479522357237111 0.1880698778899872  
0.1669556335209027 0.7515079664747674 0.6944799428285109  
0.3351189960589384 0.7454605703849925 0.8197565100076709  
0.1631208870467783 0.2487800655689404 0.3213696068534709  
0.1131205349790481 0.1691454774269558 0.1554195124294884  
0.2734341897819151 0.6757486120264501 0.6583535894871280  
0.2142143773448962 0.3227151665022756 0.1427897294576910  
0.0552273414332443 0.8302681551138571 0.6593468036737051  
0.1132985022243684 0.8297524057274471 0.8576257804178102  
0.2604874985524793 0.3393637899051719 0.3475590180417395  
0.2207701415955647 0.6703724724783335 0.8619218269998699  
0.0549439604487958 0.1663247998318693 0.3514687449034878  
0.2219080729026621 0.8282644172784598 0.8622230343220910  
0.0552650705361437 0.3268580624748214 0.3579838280334711  
0.1119239948885789 0.6710111658314005 0.8591494822956620  
0.2772960526898582 0.1732098591540594 0.3608803490072159  
0.2214469493099825 0.1658827719344351 0.1636697398053705  
0.0574112463084048 0.6706542524976761 0.6544798747403585  
0.1061673384306078 0.3283881668589387 0.1521862932137971  
0.2790170099527631 0.8319416533315116 0.6657065745259627  
0.5055693417370397 0.2183199474560111 0.2865779440813642  
0.4828499979151253 0.4244122937273729 0.4030675195558005  
0.5465906241348314 0.2177776140527190 0.5316726315515489  
0.5959104359595728 0.3023546605884770 0.3390352868267039  
0.4680207802080313 0.3588580525309031 0.4111975462916122  
0.1671354039297537 0.1392383154620477 0.1342000214530596  
0.3255721994951412 0.6488070374985953 0.6209697670547469  
0.1606428374464451 0.3543143633393064 0.1227110835117453  
0.3328627104442246 0.8581163521324877 0.6347670779681480  
0.1673701460386997 0.8570665648016896 0.8851997071854167  
0.0011484295604981 0.3560414628142911 0.3826452252575893  
0.1660148135211073 0.6421435570693460 0.8845923869833354  
0.0007794053869887 0.1384766681945881 0.3778493298215443  
0.1673606145276887 0.0667512603023213 0.0695022633575191  
0.3181085674664583 0.5825270482667050 0.5464214308394281  
0.1619406150822051 0.4280403191230729 0.0602461635478794  
0.0007975201162760 0.9301146503814274 0.5668352740187557  
0.1673906302821159 0.9294937219519883 0.9503053543114137  
0.3008179966625192 0.4609114172801710 0.4022745250399939

0.1648175829655582 0.5680556166917704 0.9464891717790859  
0.0006997534677492 0.0664046060408857 0.4441809201387358  
0.1096935798068699 0.0318355520651980 0.0391122772113674  
0.2674014642327926 0.5317156595098456 0.5619068070691756  
0.2202500431326955 0.4637121977763780 0.0355687991672935  
0.0583527410273819 0.9638924275135461 0.5331842952170882  
0.1097257197839954 0.9644191719714239 0.9805689183152677  
0.2598523961914251 0.4703130048914492 0.4922316730878094  
0.2215737300177632 0.5323516346230722 0.9798981598644102  
0.0582961274303511 0.0306874097576799 0.4730048236276551  
0.2250550223473018 0.9645013673249360 0.9805241540598794  
0.0596389274987179 0.4668409147086498 0.4712113443960648  
0.1065710249835113 0.5323036430590856 0.9713060307128770  
0.2720711769097598 0.0338647905732996 0.4847731505680584  
0.2250412422377129 0.0318894706534758 0.0391278796471664  
0.0601796320398047 0.5347399203059513 0.5290816883396177  
0.1051619077473757 0.4638602030321586 0.0272861911712728  
0.2734421307793964 0.9671976430459407 0.5453598019086160  
0.5024884424536663 0.1316938684820705 0.0898651208175810  
0.6760694403334858 0.6458439150706337 0.6247576233892657  
0.5026716821106196 0.3493291468362514 0.1086401963220941  
0.6708733056029592 0.8562874277360814 0.6254058535702934  
0.5029615514255518 0.8457588777666485 0.8663353767715227  
0.2957533643027371 0.3963436933212693 0.3235973417108003  
0.5008584663205301 0.6331525490789202 0.8620115382911784  
0.3287865587602290 0.1371890337671023 0.3768435826344133  
0.5026217859867772 0.0588206351723792 0.0294239900787539  
0.6834426429080525 0.5777417007157273 0.5545111821994322  
0.5034039944549816 0.4225142234665800 0.0450670712064408  
0.3315534330840448 0.9307673775991165 0.5693091255209065  
0.5028460571961222 0.9194578657401458 0.9247312167636793  
0.7002756543475205 0.4548459939858477 0.4130898743484045  
0.5015747520355561 0.5600449380989823 0.9265294612957585  
0.3289299794777952 0.0663581527275935 0.4455129904849710  
0.4446427596055798 0.0218630863912889 0.0082047598341841  
0.6310237196092409 0.5476905357203188 0.4979896124534844  
0.5606032672520900 0.4604723825353829 0.0202848572259282  
0.3883618329046759 0.9637722318373352 0.5310578331545828  
0.4448010582590354 0.9524664752965887 0.9561654214402545  
0.6397087204207969 0.4880766078295047 0.4259891720634858  
0.5595218136946950 0.5279600452712294 0.9617535487655664  
0.3870522717544349 0.0300753243697665 0.4700618652886074  
0.5607049804918968 0.9568260664021097 0.9450756941005870  
0.3503646437742780 0.5130564245693932 0.3856642020169102  
0.4445185365084152 0.5221831402650000 0.9524602547758724  
0.6132847181496892 0.0271627298704340 0.4604649685652685  
0.5607096852016772 0.0261419147419085 -0.0027279491680938  
0.3601502583748722 0.5718655905262079 0.4586766316910574  
0.4452678163764532 0.4546143295220387 0.0105989593605349  
0.6134127154234558 0.9612693065199687 0.5225607823194264  
0.8361458265769229 0.1382861041761734 0.1330621300801980  
0.0030473374513600 0.6423462524430384 0.6288653627192525  
0.8411518899897741 0.3543335837598588 0.1203220209136693  
0.0010057117411801 0.8580374135158573 0.6332797187393737  
0.8349075562908305 0.8559255562120517 0.8845334618861055  
0.7064724727038374 0.3939456525278149 0.3285948800257679  
0.8376640461851943 0.6411511587422412 0.8797839341081597  
0.6707843071491562 0.1344508099963939 0.3631370643292702  
0.8357971615672105 0.0656191905841267 0.0688281843565622  
0.0030364586804318 0.5689270200031263 0.5642692858396315  
0.8403590305687640 0.4277788444256712 0.0572398592681578  
0.6709536771036311 0.9283397517323476 0.5577616190378227  
0.8350363247991917 0.9283822493018793 0.9496180706088507  
0.0019810043927181 0.4297755281185250 0.4461517372975611  
0.8384691286567285 0.5672332011192320 0.9420651998350466  
0.6708262618658528 0.0631342850080393 0.4314824307315404  
0.7779227569675438 0.0317889541174890 0.0370571252037364  
0.9453855942017740 0.5321230102746778 0.5385154250830249  
0.8973294659196200 0.4620899372095006 0.0219009614250818  
0.7284288143469353 0.9645490393785642 0.5289984015419580  
0.7775933328306300 0.9644610997732127 0.9783367303604055  
0.9449489768864997 0.4642045897981430 0.4808982996865722  
0.8963992584826440 0.5302791372503058 0.9652467816129706  
0.7285408550852747 0.0306708482404550 0.4670447868975080  
0.8928680916013987 0.9622457185134226 0.9815575587537413  
0.7518317285049859 0.4819322096093892 0.4746121173680352  
0.7815032388922820 0.5330011501663086 0.9775858109879021  
0.9431243989792921 0.0326559518680625 0.4778252092302679  
0.8932435115310809 0.0296714919240524 0.0400519462345841  
0.7438142431946839 0.5439268947557269 0.5428546962127265  
0.7823771753243616 0.4646539427195262 0.0340539954019689  
0.9431840427555909 0.9658474895281371 0.5380160674396790  
0.0008163730526515 0.2786940736289352 0.1222914427781250  
0.1684335548680414 0.7269267542027052 0.6235020725117590  
0.3377355102451737 0.7273211241490335 0.8945725675539494  
0.1630059364335654 0.2792859634396782 0.3873879085203711  
0.0646937530206777 0.0584693463566736 0.0622018471208098  
0.1033770397231909 0.9368316652815040 0.5550515729259258  
0.2219577221807547 0.4293960867458637 0.5067570850399118  
0.2672363275880135 0.5592468068650702 0.9617461260822896  
0.2700656236298234 0.9380926451471824 0.9569878333502527  
0.1046114742257422 0.4420099689954090 0.4440216272249153

0.0620757242400823 0.5590432623738889 0.9458221413939869  
0.2266245791017593 0.0613522906527805 0.4668091211476017  
0.2700349223493998 0.0586301788013586 0.0620108240370414  
0.1056344129343506 0.5620977593901567 0.5473678761796984  
0.0594932936279713 0.4373603553485981 0.0464623716833708  
0.2290585707429744 0.9422805065563826 0.5750897858529750  
0.2346789059012274 0.5404094480264454 0.6302992620523453  
0.0647505068816203 0.9378431751715676 0.9571912044587928  
0.2647247723724520 0.4373650102459170 0.0620770542897935  
0.1032760792143507 0.0561888085432597 0.4472374546917721  
0.3306764982821767 0.3149250493448473 0.1822046485883815  
0.5012333775302857 0.7371473059122802 0.5975266131334966  
0.6648081100308301 0.7651874896328371 0.8917623562584990  
0.3976638532675082 0.3673931505726418 0.3056424564020451  
0.3999879728677028 0.0482343505471608 0.0334625858273018  
0.4338133103910362 0.9365731508180367 0.5497767006531183  
0.5990534844976598 0.4666915234660357 0.3796468904794076  
0.6040994241019035 0.5569377313734869 0.9425657016836683  
0.6052654263699661 0.9307315455532683 0.9187762435540529  
0.3819706929275815 0.5060712145232585 0.3156215032591834  
0.3991433213530693 0.5463452613197909 0.9259666012029970  
0.5680387101043157 0.0515911770191919 0.4342886282687592  
0.6052073925391772 0.0558684484817480 0.0139757183223278  
0.3999627360493861 0.6106154402484860 0.4471746297187739  
0.4005707563047437 0.4262286022890783 0.0305717239406433  
0.5683738644417924 0.9343760535051239 0.5448263775965625  
0.5838118383125932 0.5723871175277139 0.5093505442329742  
0.4003255657793923 0.9228380662698066 0.9388047430494371  
0.6059749226989781 0.4372792066972275 0.0484018031306935  
0.4315496205886779 0.0546595538540942 0.4404413160996500  
0.6710034478422299 0.3019272072596909 0.1464842650084463  
0.8358791143341916 0.7523947552630995 0.6130762237024935  
0.0014998813139430 0.7273771924577058 0.8954146407680859  
0.8367759792505048 0.2783075630311150 0.3846340222397412  
0.7331062078291924 0.0593236772755766 0.0589450718767167  
0.7735276839700231 0.9399935299786508 0.5560875086371251  
0.8997332891521193 0.4367298164822488 0.4617075895315148  
0.9410284650957488 0.5558091152650615 0.9378503467504232  
0.9376895189670252 0.9348015962226155 0.9595174811485955  
0.7985236465561909 0.4553047151065515 0.4661972610659880  
0.7361498116597828 0.5609251243201119 0.9604636427917861  
0.8980872036279792 0.0597560950662657 0.4560874665649968  
0.9383422339859550 0.0555032467315869 0.0644777138739400  
0.7841686819366407 0.5673578055599058 0.5879749100201116  
0.7377932163890868 0.4395192301436436 0.0624664838358247  
0.8981538913313580 0.9405228325827918 0.5639358390199303  
0.9004771070694482 0.5576112913323957 0.5646152745011676  
0.7324226773971458 0.9390111845492206 0.9535005915129215  
0.9427521961949166 0.4345448823638098 0.0395723217834805  
0.7735640248999363 0.0578503633349409 0.4454408894707468  
0.4899925255502419 0.3165656668381235 0.4656293203663455  
0.5810568068625697 0.2488262931819885 0.5022390647997012  
0.5286260945869315 0.1952372681140319 0.4655345467049900  
0.6232093141986016 0.3413058523349500 0.3005723355972916  
0.4157544925228622 0.2285023111274864 0.2289034231593375  
0.5810751803710562 0.2336252601463018 0.2374297224549677

Structure TS9 S=4

1.00000000000000  
20.9172000884999996 0.0000000000000000 0.0000000000000000  
0.0000000000000000 17.8076000213999990 0.0000000000000000  
0.0000000000000000 0.0000000000000000 12.2158002853000003

Al O C H Fe  
10 64 97 64 2

Selective dynamics  
Direct

0.0815675528260655 0.2462205340377679 0.2547867964351056 F F F  
0.2495664815919341 0.7520557514419295 0.7620635141187364 F F F  
0.2444794522634197 0.2460765493276185 0.2503358294257936 F F F  
0.0839158742802155 0.7502794583309012 0.7570567089839599 F F F  
0.5866481227105425 0.7427625730625778 0.7417778650828737 F F F  
0.4173983961466234 0.7450335844833538 0.7433395739458106 F F F  
0.7561369352143146 0.2487909423360222 0.2499733393852424 F F F  
0.9187579037576796 0.7496003129792683 0.7571460158489032 F F F  
0.9187768805637404 0.2461027067765045 0.2541950288312194 F F F  
0.7533454609081858 0.7501573361089839 0.7594015802361724 F F F  
0.6720212175087426 0.2526382739087936 0.1813576726856283 F F F  
0.8365121958293074 0.7510034649209913 0.6931600870247507 F F F  
0.0014905060733810 0.7485455640680811 0.8227609262501403 F F F  
0.8375450521636765 0.2473363602299941 0.3190943700679796 F F F  
0.7810157529779858 0.1646319024917773 0.16105842666101753 F F F  
0.9481010359318560 0.6703913511088970 0.6532325699793020 F F F  
0.8947655572912367 0.3273145292831359 0.1514666569723957 F F F  
0.7249229976805367 0.8305141603371098 0.6586605890327846 F F F  
0.7800443063141316 0.8272490822449114 0.8601954751644172 F F F  
0.9466459143038932 0.3271447098945472 0.3580242660226673 F F F  
0.8921566919303388 0.6688787309869610 0.8555716355495235 F F F  
0.7218521376732170 0.1727264162459718 0.3551962158296718 F F F  
0.8887826005103463 0.8272382789893697 0.8591676769354635 F F F  
0.7408731712478911 0.3357570553037021 0.3466942495447967 F F F  
0.7834414417799778 0.6694048877324619 0.8584991746717918 F F F  
0.9464715496577867 0.1665783015997704 0.3528465658465407 F F F

0.8894568591772156 0.1676698920883126 0.1550468464803458 F F F  
0.7288478509500749 0.6746459758914085 0.6580192169153776 F F F  
0.7866730879653616 0.3217525883172954 0.1399979520648884 F F F  
0.9468031443642246 0.8296764994154557 0.6599405491841637 F F F  
0.3278963195664630 0.2520002743054164 0.1897594298446492 F F F  
0.5015925122413663 0.7446195701121923 0.6748161878681600 F F F  
0.6684483173176119 0.7454917240515115 0.8172903496550319 F F F  
0.4345569415684508 0.3472890972665938 0.3604652592210300 T T T  
0.4495104553102891 0.1589896366664902 0.1095630797289928 F F F  
0.6203904866096295 0.6696066325676426 0.6435454391465782 F F F  
0.5541878281924468 0.3216200759632954 0.1253595324129222 F F F  
0.3874650164741240 0.8283954278115644 0.6513216343636401 F F F  
0.4489262768864037 0.8172935491935291 0.8446183116795538 F F F  
0.6729489510198761 0.4013534110742611 0.2390618941848288 F F F  
0.5546837939238998 0.6614229292363092 0.8350628257714945 F F F  
0.3834181186245047 0.1564387286077249 0.3361556391622003 F F F  
0.5577422608475757 0.8168580512064452 0.8428309577897153 F F F  
0.3427455497336142 0.3923531524830504 0.2545516473259345 T T T  
0.4457348449034058 0.6614824387162770 0.8338542691604047 F F F  
0.6169655826243741 0.1466079905627922 0.3224814512012415 F F F  
0.5590514804619460 0.1592737411667997 0.1142774113476008 F F F  
0.3816929119274235 0.6744986368824257 0.6394372940817661 F F F  
0.4456115887000607 0.3211682501239963 0.1321465877437333 F F F  
0.6163262218098637 0.8251631977073473 0.6455458406435000 F F F  
0.0004739212717624 0.2474622932413268 0.1886275849388852 F F F  
0.1666887465792115 0.7511875391095089 0.6942015237902908 F F F  
0.3349999763176967 0.7464939027630066 0.8185273852760844 F F F  
0.1637982648455392 0.2477117861469296 0.3193744274148429 F F F  
0.1109267271252108 0.1679429585158374 0.1549122915086656 F F F  
0.2729737687935128 0.6758158277087460 0.6585887662068686 F F F  
0.2160515154187337 0.3240861021057029 0.1463180476475330 F F F  
0.0552519203710347 0.8296100432781230 0.6591880803845243 F F F  
0.1128906245459120 0.8283427205293137 0.8575433925831959 F F F  
0.2618905956868289 0.3395997528111820 0.3493021279250144 F F F  
0.2207155000798409 0.6702945366744331 0.8617607997248484 F F F  
0.0547408856434046 0.1666883300810866 0.3529988732244504 F F F  
0.2215427504827119 0.8281746298546295 0.8613992039947362 F F F  
0.0552365310382186 0.3267258909220985 0.3574630780023398 F F F  
0.1118470335732837 0.6701035680964509 0.8585973879083610 F F F  
0.2762684145493424 0.1721012385252152 0.3580724406416351 F F F  
0.2192763589117490 0.1649652208033601 0.1597063731284081 F F F  
0.0568664563624566 0.6700283385089847 0.6543498646481751 F F F  
0.1076384944194473 0.3273189529590326 0.1518726102044354 F F F  
0.2789528156604746 0.8316816885203266 0.6638965020784795 F F F  
0.5030765659057184 0.2165731118640864 0.2893340780396488 T T T  
0.4950566591515804 0.4304501050321384 0.4614647374569444 T T T  
0.5255981427747531 0.2349453284329208 0.5026599523802224 T T T  
0.5926271885386640 0.3047500676903923 0.3386187119277722 F F F  
0.4752163569496058 0.3688394272879461 0.4305485457902998 T T T  
0.1647132601105099 0.1381207109881259 0.1321815994751532 F F F  
0.3254552620178472 0.6494469612986720 0.6221759297927036 F F F  
0.161972028333024 0.3544676527037893 0.1246759051942092 F F F  
0.3326858290784571 0.8578943380540665 0.6323625449389354 F F F  
0.1667430337085207 0.8562708394199845 0.8846791438892154 F F F  
0.0009591733626380 0.3555727819669059 0.3825251621255674 F F F  
0.1660689621229352 0.6418651083591556 0.8845007356088530 F F F  
0.0005257690221754 0.1384484412965818 0.3788101760334683 F F F  
0.1650136696508966 0.0656720841432872 0.0679683608977513 F F F  
0.3189644134957135 0.5819729684579897 0.5499178730280008 F F F  
0.1628439789822096 0.4283484930242878 0.0623866049949271 F F F  
0.0008182409084156 0.9298853172514470 0.5675523125476403 F F F  
0.1661977076190055 0.9285681286120919 0.9495719589265121 F F F  
0.3059302814701326 0.4569220079543328 0.4128844732525820 F F F  
0.1651295724024848 0.5680144773755487 0.9473054078182983 F F F  
0.0005849662927631 0.0663306572889013 0.4451332194512858 F F F  
0.1075702672482777 0.0306481257689839 0.0368636260508808 F F F  
0.2692080003747392 0.5302063842564806 0.5673145947600702 F F F  
0.2209483455591865 0.4639308613459079 0.0361233038476101 F F F  
0.0583427088049859 0.9637999312682766 0.5340028514916284 F F F  
0.1081765131402506 0.9631827340786074 0.9785544511543804 F F F  
0.2635984027807439 0.4670250170826833 0.5009519295144003 F F F  
0.2220609465609300 0.5323415752586556 0.9798772148178401 F F F  
0.0582144042684689 0.0306683333898903 0.4739683957207177 F F F  
0.2236237556433238 0.9636579543488679 0.9806640008380256 F F F  
0.0591942397732410 0.4658491677357404 0.4729164957384100 F F F  
0.1070369169030982 0.5324623467809175 0.9737075007625648 F F F  
0.2715512033443304 0.0332958179744836 0.4822902880838811 F F F  
0.2230424405814588 0.0310831104422959 0.0389451820182174 F F F  
0.0595911773385822 0.5337664101495321 0.5306996507879944 F F F  
0.1058845862131932 0.4642174438440279 0.0303273037445067 F F F  
0.2730288402661429 0.9667098413432669 0.5430931954520943 F F F  
0.5050569998936965 0.1313347334108173 0.0884418756886234 F F F  
0.6768981561224479 0.6455462015631710 0.6234643017059014 F F F  
0.4996696312805824 0.3499326827727458 0.1048132999510045 F F F  
0.6708224925639712 0.8555236812623122 0.6266313706287363 F F F  
0.5035167897164925 0.8454290868493359 0.8661763553829118 F F F  
0.3020023183512279 0.3916164785862222 0.3382412970969995 F F F  
0.5002965180168175 0.6334063205984464 0.8590985489707705 F F F  
0.3285362933301599 0.1366981789265651 0.3739118894396682 F F F  
0.5050884387188077 0.0585511844494917 0.0281078678614648 F F F  
0.6840590928218475 0.5782220759962229 0.5514824363385031 F F F  
0.4996205361572592 0.4234622691670253 0.0423543291846968 F F F

0.3311587082755665 0.9300764677182087 0.5661272029478113 F F F  
0.5041534935167746 0.9191786487840545 0.9240368668766479 F F F  
0.7006481021565634 0.4561455376331267 0.4081030843975313 F F F  
0.4999915222539286 0.5607344164547996 0.9237887449191433 F F F  
0.3283211360161289 0.0654678301966385 0.4420167843856717 F F F  
0.4467178109998073 0.0235067736307570 0.0034939889937746 F F F  
0.6337713088108430 0.5551143880915603 0.48366693137140955 F F F  
0.5573629916876399 0.4607974726917377 0.0189610689756208 F F F  
0.3878377333993299 0.9625923423199936 0.5264443865555108 F F F  
0.4462845442050849 0.9540292246394415 0.9518847034413156 F F F  
0.6427372895526844 0.4961765342390336 0.4106529237819956 F F F  
0.5574293085191258 0.5281662479303222 0.9603574945652369 F F F  
0.3864215215593632 0.0288238264081073 0.4653410640740105 F F F  
0.5624429233934549 0.9547049644358196 0.9474796862091637 F F F  
0.3540685640100065 0.5105598875285509 0.3935983361508590 F F F  
0.4423927912250818 0.5235564974382854 0.9481607402042371 F F F  
0.6143030745583715 0.0266262677108955 0.4624871284249821 F F F  
0.5630168219531768 0.0240768226412484 0.9995403038112869 F F F  
0.3617377127976837 0.5713422247341597 0.4634037204969417 F F F  
0.4421808884519933 0.4560233218028458 0.0063212313355194 F F F  
0.6139797204350259 0.9605240864542637 0.5238615045224435 F F F  
0.8353882792285106 0.1379103090936340 0.1330478060169611 F F F  
0.0023993487752350 0.6419144620319130 0.6287495167034436 F F F  
0.8403890767872966 0.3532185268138051 0.1208717505553309 F F F  
0.0009825405495150 0.8577197050171392 0.6338351623603558 F F F  
0.8347158238693311 0.8553283838831760 0.8849064236826152 F F F  
0.7063801971031367 0.3941267668745638 0.3249259132889151 F F F  
0.8377201117405306 0.6405335049428160 0.8811419197450761 F F F  
0.6716280402110613 0.1332476003212690 0.3663122172312256 F F F  
0.8352817372384322 0.0652036043673618 0.0687396334851513 F F F  
0.0023388712617916 0.5684843376502329 0.5642129165569756 F F F  
0.8398017824205297 0.4268591771991552 0.0579994778889343 F F F  
0.6713529607204975 0.9276370402363057 0.5599296864378616 F F F  
0.8348118799060060 0.9278043698773644 0.9498637013672422 F F F  
0.0015628059650439 0.4292903960343537 0.4461720319373086 F F F  
0.8383799595556738 0.5665640943664201 0.9432882705966747 F F F  
0.6721717107700940 0.0626674742087800 0.4354767681312097 F F F  
0.7774916588945544 0.0308406552791780 0.0378070948179428 F F F  
0.9447104969886269 0.5321915295238497 0.5368343519356955 F F F  
0.8968814296494401 0.4609940961990873 0.0227100800671067 F F F  
0.7290603571135605 0.9639271630725545 0.5330459280253024 F F F  
0.7773006821873523 0.9634275615731411 0.9793136696750366 F F F  
0.9443927289027627 0.4642560123891002 0.4791959148076259 F F F  
0.8961837255791991 0.5292764814251782 0.9662664478138296 F F F  
0.7295350168608081 0.0303851816606896 0.4720171853498698 F F F  
0.8925894712083817 0.9622184186688330 0.9808435731837122 F F F  
0.7496691621083613 0.4765145044962793 0.4805336643816958 F F F  
0.7813259974539193 0.5325590338013484 0.9788945552510242 F F F  
0.9430465400721175 0.0324217219386824 0.4786739021181674 F F F  
0.8928216360747356 0.0297151242261151 0.0391997683895866 F F F  
0.7420673931133805 0.5382932189038243 0.5494555207814429 F F F  
0.7819506745060565 0.4640796267973641 0.0350840174727267 F F F  
0.9431745506757281 0.9655552303622201 0.5387540239026407 F F F  
0.0000518136752774 0.2749865221352081 0.1199393155378985 F F F  
0.1681719048714143 0.7280182434283233 0.6222510378879349 F F F  
0.3381949726246702 0.7318666617528820 0.8948709254360949 F F F  
0.1637185816556794 0.2729714141708612 0.3898479453889792 F F F  
0.0623967668776402 0.0571942645662133 0.0591617608624659 F F F  
0.1034169217083729 0.9368129072017410 0.5557935680968384 F F F  
0.2263833141175624 0.4253411801927385 0.5159721009697051 F F F  
0.2676334651151535 0.5589906186341267 0.9603610274567629 F F F  
0.2688305338494530 0.9373160310276205 0.9580987853823970 F F F  
0.1042326810615677 0.4405010474006161 0.4470700720792848 F F F  
0.0623937261283984 0.5591773110181677 0.9488840759076567 F F F  
0.2260834582753830 0.0609870232650991 0.4651773325459487 F F F  
0.2677518960310508 0.0580770152333372 0.0627407109629843 F F F  
0.1049877108113861 0.5608075223196636 0.5503525457531850 F F F  
0.0602692639752149 0.4379502498398224 0.0505710844605574 F F F  
0.2287689289891119 0.9420773112420804 0.5738921733794058 F F F  
0.2357657144950593 0.5398347366245133 0.6343814201171938 F F F  
0.0634845912174313 0.9363310575086174 0.9543054561859776 F F F  
0.2656373339032001 0.4373264129721051 0.0609631468032674 F F F  
0.1031805332748092 0.0562357137400653 0.4482580235995570 F F F  
0.3317663789687231 0.3032581037037900 0.1611462303490256 F F F  
0.5017021391855820 0.7514766647521824 0.5960176841615308 F F F  
0.6642951570734752 0.7635955701135160 0.8919167532593022 F F F  
0.3886101159116750 0.3874262438429196 0.2883622115699497 T T T  
0.4022674228008114 0.0515084728284592 0.0258744363088113 F F F  
0.4333032490447692 0.9351838406830311 0.5443322878917982 F F F  
0.6043922065656844 0.4800175005681098 0.3551855382165598 F F F  
0.6024163923134438 0.5565108512589063 0.9419500462522805 F F F  
0.6068439341965970 0.9270936316613572 0.9237208004777671 F F F  
0.3855535209334846 0.5044755904658302 0.3232351848522796 F F F  
0.3975257344891716 0.5481101621486033 0.9200821662115928 F F F  
0.5693567256757746 0.0512602499726924 0.4349112957445058 F F F  
0.607772362780745 0.0524791973338310 0.0189823562341473 F F F  
0.4002093092127126 0.6116343287559829 0.4503356731903594 F F F  
0.3972547142220861 0.4274908523723653 0.0243470583560921 F F F  
0.5688313578125772 0.9334302853859668 0.5448866792100731 F F F  
0.5880906192505364 0.5844788033594881 0.4876681174104363 F F F  
0.4015259219275507 0.9257470403760237 0.9319851100888812 F F F  
0.6022300940707481 0.4367053881832632 0.0479714675238299 F F F

0.4307557017984038 0.0532630275739194 0.4347541613597699 F F F  
0.6695790223903302 0.3053109549014863 0.1560114173061891 F F F  
0.8355270067040479 0.7425360823201714 0.6147168078506908 F F F  
0.0013979716506825 0.7265240524592187 0.8955088926323285 F F F  
0.8360079331616888 0.2777148232501219 0.3852135328039168 F F F  
0.7326218800813535 0.0580410576781105 0.0602433343346931 F F F  
0.7739299764532817 0.9392673086751842 0.5608634404597979 F F F  
0.8991140676191165 0.4374315842247753 0.4584801955448228 F F F  
0.9408787458292593 0.5546312574836421 0.9388087983139570 F F F  
0.9374737205387191 0.9351620892722110 0.9581385437572933 F F F  
0.7941213598422365 0.4445003445386817 0.4809552475843546 F F F  
0.7360656767081153 0.5607566828540484 0.9620084932111155 F F F  
0.8979637038898076 0.0593968324213847 0.4569012401049122 F F F  
0.9378823259368900 0.0559684541675836 0.0628765306685111 F F F  
0.7807348395654046 0.5563017439662730 0.6033166530546907 F F F  
0.7372967034250806 0.4391440405778226 0.0635632926088050 F F F  
0.8981877715999502 0.9400493383680768 0.5645167403353426 F F F  
0.8996734221159528 0.5580750989500203 0.5614628609366292 F F F  
0.7321782453223662 0.9375387574592864 0.9552225540792847 F F F  
0.9422171842898237 0.4331998840652531 0.0402697262507843 F F F  
0.7745152519081984 0.0580405703527518 0.4513837855843121 F F F  
0.4987073557229252 0.3156368641655020 0.4770457080735332 T T T  
0.5701275830952192 0.2504346046186166 0.4896091252243117 T T T  
0.5128418622351081 0.2177519779827547 0.4266005078693800 T T T  
0.6186769979635542 0.3445142410626545 0.3017884640729207 F F F  
0.4211765236475069 0.2275310616479950 0.2249892729888183 T T T  
0.5819860916209975 0.2334327675627706 0.2361876274729246 T T T

Structure CO2/9 S=5

1.0000000000000000  
20.9172000884999996 0.0000000000000000 0.0000000000000000  
0.0000000000000000 17.8076000213999990 0.0000000000000000  
0.0000000000000000 0.0000000000000000 12.2158002853000003

Al O C H Fe  
10 64 97 64 2

Direct

0.0799149809987027 0.2458241327261486 0.2555274967501010  
0.2492437422566736 0.7513415496153945 0.7596038845497706  
0.2423072307362218 0.2419174936295695 0.2475981048797412  
0.0832938556058512 0.7486488162165956 0.7558764706889476  
0.5867553955084169 0.7427706332933038 0.7395572809164572  
0.4175630197462008 0.7465751473467489 0.7394098700485131  
0.7556594976744022 0.2475300196328579 0.2517713311953609  
0.9182544059498365 0.7487438944506341 0.7579869786490933  
0.9177712290070086 0.2451882337705441 0.2542237983555292  
0.7532637217317310 0.7485653936067398 0.7604366595068820  
0.6741050959276650 0.2573871254909088 0.1855488798648021  
0.8362304106590370 0.7490477644988802 0.6935176331923584  
0.0011859027371996 0.7471171434729627 0.8227298787354299  
0.8373218799971922 0.2465212246287702 0.3199590962364568  
0.7805020710835266 0.1635942228070829 0.1611041161958315  
0.9471320183797357 0.6696079456275634 0.6533928923925760  
0.8955151785143478 0.3264141210918003 0.1519632764043858  
0.7244430001710515 0.8283333752687051 0.6592304952350578  
0.7796756953537575 0.8261139763649847 0.8601043752542487  
0.9457404578192394 0.3258596553238826 0.3589851094827749  
0.8920989221464578 0.6679715974239865 0.8572639361754113  
0.7239920449412335 0.1715057005076785 0.3568970356598486  
0.8883327835887659 0.8263942932396724 0.8588029007938934  
0.7406030574439499 0.3365976990084326 0.3455651931494952  
0.7833260078321606 0.6685150498551673 0.8609189205448599  
0.9460279715644070 0.1654848343796045 0.3533611439287914  
0.8889148341410056 0.1665458670870736 0.1554113738428310  
0.7297704802036661 0.6715364466451428 0.6597853681612151  
0.7876499203036260 0.3202310395115416 0.1401651268506618  
0.9466004763005984 0.8290696430288116 0.6611642638077539  
0.3217492815515070 0.2495906746915782 0.1772651159150924  
0.5017453214990465 0.7467673790051795 0.6705135337308145  
0.6680621670122145 0.7435801822605009 0.8168371603555117  
0.5294901624722820 0.4181565259374173 0.5215718455250344  
0.4493762230499931 0.1633133419489399 0.0950331581333723  
0.6214607747517633 0.6706796248886731 0.6390254980373227  
0.5462633436166356 0.3209738531290913 0.1209850236505240  
0.3873343297839274 0.8287484296383770 0.6472551118424912  
0.4486112721842172 0.8183077263954237 0.8421755646254436  
0.6770479778624562 0.4030551970770189 0.2304272174268491  
0.5542854556341129 0.6603514088288112 0.8276647891825624  
0.3769724263126124 0.1478452849569412 0.314186624423783  
0.5574702454935540 0.8149917271152736 0.8443626149639807  
0.3711601522686660 0.3524779891775616 0.3253265099093240  
0.4454503516182852 0.6630830166712431 0.8270490582129951  
0.6179360108066840 0.1515244345411318 0.3292997902805986  
0.5570479381178995 0.1577677532077341 0.1214216087989577  
0.3813563308630087 0.6752149431802320 0.6351790180024399  
0.4376765709375234 0.3261120631404197 0.1269789190025069  
0.6158537447612655 0.8252726553097505 0.6466298614798834  
0.9995372689307450 0.2466473396770942 0.1892667415988906  
0.1663118661480245 0.7498736021779003 0.6927001492740367  
0.3348171338282579 0.7469785739213586 0.8147061180105540  
0.1626813571165441 0.2465249743452559 0.3176648112537395  
0.1066067203033875 0.1659358614455371 0.1541530007950687  
0.2727893563443056 0.6740481304303111 0.6566786198427010

0.2163530469190227 0.3264845459938414 0.1536384002691258  
0.0550193135280829 0.828233960008986 0.6586732609593048  
0.1124856813517742 0.8258433651083915 0.8567149956106959  
0.2681995676944675 0.3317807865815773 0.3591985756191453  
0.2206945248934537 0.6695862249928358 0.8603500823605901  
0.0542497599676280 0.1671981369026299 0.3559791771449170  
0.2211671897789120 0.8276720767215141 0.8588629687468667  
0.0542994379878265 0.3266962855396126 0.3566766090556959  
0.1117958123389848 0.6686051315699745 0.8573103159627610  
0.2724664736233256 0.1693358974569702 0.3520816587761287  
0.2148152793788647 0.1651400680515610 0.1523872691772704  
0.0558993191521261 0.6687639407075471 0.6539579822000005  
0.1079427768204229 0.3265528259254136 0.1520542192777587  
0.2786761128239654 0.8302385527974159 0.6594432974418624  
0.4881394480140263 0.2238503733602092 0.2959886638946695  
0.4914494603376729 0.4390841883488348 0.3429301001695625  
0.5241112109857080 0.2396393337823430 0.5062452019793995  
0.5836474393391761 0.3145427701778847 0.3477031991554915  
0.5123525509443686 0.4267436435709036 0.4311055778732647  
0.1601830823656739 0.1368983089602347 0.1285850820589069  
0.3255085023114750 0.6489855267343381 0.6194859040012731  
0.162053536344706 0.3553606266868280 0.1284175217286344  
0.3321170098269630 0.8572712803347790 0.6278813737017993  
0.1660436100502216 0.8547033691716394 0.8830679133660920  
0.9998534552266647 0.3548785599321331 0.3825331178729827  
0.1661583089935127 0.6411221144197796 0.8837574254807620  
1.0000212457295385 0.1381366714518566 0.3806597893018516  
0.1610118134048196 0.0641258689531539 0.0653596696689027  
0.3200603094427400 0.5801594325173757 0.5488623404876376  
0.1631620900945496 0.4290337395986683 0.0656721524532209  
0.0005648799026144 0.9293143805332252 0.5688399041803756  
0.1644448440436820 0.9268633632816801 0.9479737294614877  
0.3134346463059065 0.4479853968664422 0.4242162359023992  
0.1654074846799325 0.5678599235428947 0.9482579118751031  
0.0002697774097609 0.0660418447305358 0.4470468017547427  
0.1041113113059691 0.0288224937923900 0.0329131150927454  
0.2724227037038456 0.5265416186400805 0.5701091311127434  
0.2212516462583712 0.4638343788295181 0.0369939449892494  
0.0580826426207123 0.9634717653218509 0.5357659772009974  
0.1058419814693628 0.9609247449056886 0.9750022034983474  
0.2694960910643329 0.460446868250236 0.5092468490191187  
0.2223978912543139 0.5318045029790901 0.9796220812158757  
0.0579146791692958 0.0304840528854015 0.4760684123107901  
0.2212947456469202 0.9623769016024328 0.9808363440669556  
0.0579200642627276 0.4640041871985450 0.4754459953073185  
0.1073461116657324 0.5332321920450712 0.977309777998804  
0.2693547789527747 0.0311655609939924 0.4773026797715014  
0.2195956181508560 0.0299283882971679 0.0386101544041548  
0.0583021931531582 0.5318861467461119 0.5332022385678086  
0.1062081596810970 0.4653940199192944 0.0349836293983728  
0.2715711513845539 0.9653774947466851 0.5397153758168086  
0.5052281880636653 0.1320600882793235 0.0852589212839721  
0.6776719622375449 0.6452480126010681 0.6212552236776142  
0.4934763329602770 0.3518919488745145 0.0998227351331120  
0.6708383048846708 0.8549697287546142 0.6279588034325525  
0.5035676561170243 0.8450961640746534 0.8657633557183628  
0.3149793452045568 0.3743149238072350 0.3671096484771741  
0.4995028563064524 0.6338972201909836 0.8524336295516352  
0.3247367448306702 0.1315954592739223 0.3612684917727323  
0.5055692903081453 0.0587915337588687 0.0260878125896013  
0.6846645173616350 0.5791319795145951 0.5466477255365945  
0.4943054133129640 0.4254516653953532 0.0371548022935589  
0.3299610831084257 0.9288630438842147 0.5608693510637703  
0.5046563451055035 0.9188955489636250 0.9232811834274016  
0.7014032412217081 0.4582106482895485 0.4010700822615265  
0.4977231504787699 0.5619792944487877 0.9177170115047834  
0.3254582498839141 0.0622428311189338 0.4331141755430380  
0.4474374020599717 0.0261586804461870 0.9943555646287029  
0.6421438516019418 0.5688179173622017 0.4592924702662660  
0.5526946658725519 0.4616342435349272 0.0154611404403992  
0.3861507118496285 0.9607955973589507 0.5181387456615629  
0.4469504833019137 0.9564333951813908 0.9436205126714929  
0.6517613253185176 0.5103675519703531 0.3855790302738196  
0.5543456913347501 0.5287506979263510 0.9564042136419763  
0.3839388273851482 0.0260527408481443 0.4549870214617923  
0.5629181134654981 0.9520150869114675 0.9536929154929975  
0.3581319764827641 0.5043107170035261 0.3983964075907626  
0.4392888242707436 0.5261304655453417 0.9402311307235337  
0.6155072983527787 0.0267487916114956 0.4647728380389155  
0.5634315533953794 0.0215680256118428 0.0054034582290132  
0.3623441811572432 0.5690569837754705 0.4615775185874309  
0.4376521227246594 0.4589019501202687 0.9989358704540743  
0.6148357515872422 0.9602830836121345 0.5253261176286969  
0.8347109332866527 0.1368899216813841 0.1332181369743316  
0.0012675512101360 0.6408855261235505 0.6286094724917686  
0.8408979671409323 0.3519911955507745 0.1212714509159957  
0.0006884164045222 0.8568652652139318 0.6344679450084856  
0.8342549155342188 0.8543994457567980 0.8848552835700896  
0.7075599358972251 0.3952263076154827 0.3190465365745764  
0.8376910942470303 0.6396035159964946 0.8831236033981755  
0.6722329268745825 0.1345324008569571 0.3705269618821052  
0.8346594198027780 0.0641747647186314 0.0687248132926286



0.0009890002171861 0.5675647515464411 0.5641206407725147  
0.8400727392681168 0.4256835337036413 0.0586565072953470  
0.6719100373702831 0.9274639758253473 0.5628696676245860  
0.8342954267004491 0.9267571049623639 0.9498617950680183  
0.0002258108842216 0.4285540076486952 0.4461246909188762  
0.8384400476557136 0.5655658998431010 0.9448489898589459  
0.6732880618568928 0.0634581962406043 0.4397208754237957  
0.7768943146517558 0.0291025408603339 0.0393746625968240  
0.9433010716706728 0.5323484721240700 0.5342208875285953  
0.8970588713261713 0.4597766832252431 0.0231459179988628  
0.7297079645134239 0.9644216863935565 0.5386231180971429  
0.7767523279353825 0.9616804847996600 0.9808900044785797  
0.9429440500067910 0.4644435794484171 0.4764758620209624  
0.8962874437540606 0.5281626229251396 0.9670729236039119  
0.7303979936514502 0.0313231009019105 0.4784110689630126  
0.8920480709552592 0.9618866414108724 0.9792579724422367  
0.7423615519168663 0.4669476901096394 0.4909193361107877  
0.7814395354974981 0.5315276500152039 0.9806767654296259  
0.9427429142689558 0.0319027166814955 0.4801780142313090  
0.8922017772283353 0.0293795478700960 0.0376057728106802  
0.7352336530395679 0.5281562222208651 0.5612068310424307  
0.7821238078719841 0.4628680148530370 0.0363723029479345  
0.9429012676238049 0.9649177206167798 0.5399861575383139  
0.9985887616192924 0.2714719909126220 0.1184883761607232  
0.1675003621108156 0.7296304363153835 0.6189195049233492  
0.3388542272755639 0.7409033557376106 0.8933413398392449  
0.1631985308275297 0.2547240321573381 0.3961290094879267  
0.0585142065891701 0.0546775567031601 0.0536453202620207  
0.1031839046963517 0.9365476873458308 0.5575595483944369  
0.2342157714394365 0.4172700320659244 0.5283711613060765  
0.2679669751701277 0.5578106820653550 0.9582343171831312  
0.2669136228228510 0.9363131033715463 0.9601065174741319  
0.1029400054485628 0.4376490745467052 0.4516714184047576  
0.0626431504004769 0.5603170485015431 0.9537419055782063  
0.2237780013503832 0.0589340625731743 0.4614365150569697  
0.2638416924811024 0.0573006245530150 0.0639166046917627  
0.1036633965875355 0.5582098915952197 0.5550571881213208  
0.0606319806711316 0.4398112443232627 0.0572418652982931  
0.2277482805452652 0.9412715192327947 0.5730378532409988  
0.2387561955716105 0.5366188615434896 0.6367336654657737  
0.0616269578307078 0.9335636603952853 0.9494469802070952  
0.2660538347005737 0.4368779460525059 0.0604309576051459  
0.1028930832893705 0.0561249684792110 0.4505860705245304  
0.3196788984987731 0.2884714501410682 0.1212353544421595  
0.5028621483895597 0.7737848308931440 0.6014314146259689  
0.6634607312133359 0.7606414093273197 0.8919060039454898  
0.4054712081633863 0.3901127603519074 0.3324827696714535  
0.4031506152621064 0.05636608149722819 0.0107099795663233  
0.4318645084220605 0.9336359831947024 0.5348971154156873  
0.6210849828692889 0.5039225021246037 0.3139424505812444  
0.5998313368988721 0.5563041701607208 0.9391084206987076  
0.6073432208894032 0.9224388347521669 0.9357028993815714  
0.3898591954338950 0.4985172885293069 0.3280575686832559  
0.3952143537072653 0.5515825757374060 0.9100844177834755  
0.5708844167942363 0.0515043965589796 0.4359920992203338  
0.6080922947733650 0.0480984650724534 0.0305051642657677  
0.3983723955111570 0.6116099342777983 0.4437645897267150  
0.3921297365030263 0.4310917779064004 0.0150579844749415  
0.5695874598493287 0.9328061628118995 0.5445364629578756  
0.6026788665526330 0.6082427278111312 0.4487463081491896  
0.4022900832487622 0.9300779754591860 0.9183470009639362  
0.5967332777414834 0.4363150918664097 0.0459661347616767  
0.4277826927617813 0.0500162752072356 0.4215285704191614  
0.6734032363745550 0.3124325484047825 0.1696874049056653  
0.8351365370270960 0.7285019375846084 0.6199043510861162  
0.0012017536148269 0.7247959289334129 0.8952816885853052  
0.8359061739422518 0.2762347963256626 0.3866803708215178  
0.7320074017152975 0.0557461212464736 0.0630876744191120  
0.7743300701181294 0.9397699531544180 0.5678371860807661  
0.8975610900518675 0.4386250241028368 0.4536151281371416  
0.9409176941437049 0.5534881603597731 0.9393009710102399  
0.9369564451588688 0.9354102387280504 0.9552960991020073  
0.7801308470196601 0.4257237852133506 0.5044936448491052  
0.7361666124539809 0.5598787520266381 0.9643855069283952  
0.8976332111351499 0.0587235108286952 0.4581688640020977  
0.9372050717930346 0.0562396331126898 0.0601103080401381  
0.7682875599747871 0.5366093916362298 0.6292174105544900  
0.7375620339159736 0.4378629229925738 0.0651660022661995  
0.8979193417078024 0.9391796382216752 0.5652714086641419  
0.8981851566066962 0.5589207876619193 0.5568426435293803  
0.7316407594427506 0.9352481570223152 0.9580206239447515  
0.9423199144268128 0.4317022812612232 0.0403196231183950  
0.7755854646762778 0.0593371985614528 0.4602416291206249  
0.5060550612432322 0.2710118050392678 0.5635123937459854  
0.5553101892619047 0.2723587012796388 0.4668273303471990  
0.4890772997241667 0.2249895292339083 0.3777526317656715  
0.6119336932063700 0.3543183567279041 0.3209767655869371  
0.4154598281037721 0.2281372616607437 0.2071641363776983  
0.5850470979330813 0.2387314954329711 0.2373487161042749

Structure H2O2+H2O/3 S=4  
1.000000000000000

20.9172000884999996 0.0000000000000000 0.0000000000000000  
0.0000000000000000 17.8076000213999990 0.0000000000000000  
0.0000000000000000 0.0000000000000000 12.2158002853000003  
Al O C H Fe  
10 64 96 64 2  
Direct  
0.0815946266960401 0.2511456194570664 0.2550317325781660  
0.2496836316920737 0.7534461556348303 0.7536525378890404  
0.2458195854022423 0.2502682507131996 0.2539991547879114  
0.0835007023208572 0.7523664617859463 0.7549027687325554  
0.5848788635206090 0.7492708682152068 0.7501985459348257  
0.4166289866366024 0.7519159185140853 0.7459653451906607  
0.7529594957126249 0.2496337068281075 0.2537498098799236  
0.9176212808468647 0.7498027363353034 0.7584557116224870  
0.9170630682694110 0.2517471205844613 0.2560297153486970  
0.7518794013271610 0.7474245529325478 0.7627845294238373  
0.665159563503055 0.2404765764485906 0.1914364442791226  
0.8348871728044583 0.7483280924759118 0.6951627045948059  
0.0009770834095194 0.7506566415525353 0.8221137526777609  
0.8347068454526027 0.2502746932521284 0.3219661104277383  
0.7835524546387619 0.1767111038638341 0.1451956419648072  
0.9475724602372836 0.6707475725512276 0.6566962545969535  
0.8862160580034233 0.3297816578216652 0.1579986156814779  
0.7255823394946479 0.8235402327887810 0.6591558848289578  
0.7793483433507314 0.8289926932018652 0.8616003867545707  
0.9466651002904251 0.3321192812323844 0.3534669836447171  
0.8906488523108482 0.6696349489556370 0.8584577499065004  
0.7287842610041790 0.1644969169946761 0.3505914026857838  
0.8881863328800124 0.8288279934794232 0.8602441387305385  
0.7198520155345911 0.3259912358622157 0.3573972164689139  
0.7820246248201447 0.6711199295889277 0.8624504694321947  
0.9442146431052558 0.1725490012504949 0.3587095286980326  
0.8917906134788040 0.1712502589982189 0.1539555271501537  
0.7241123292486085 0.6671750132038790 0.6658658744120579  
0.7776150868349997 0.3326245549044927 0.1617253888142662  
0.9441690836678949 0.8301807119606096 0.6579810225346164  
0.3288501892536904 0.2502025325799530 0.1843419390567897  
0.5011401170992013 0.7509835398653657 0.6814962855165524  
0.6669447871696036 0.7492457393164390 0.8233039978193871  
0.4934888946876765 0.2629430446334655 0.3060540876733741  
0.4425857109633143 0.1657983246923088 0.1489985101466831  
0.6156616404527436 0.6703220390196654 0.6547198791962341  
0.5482205789456880 0.3306173659009803 0.1332393957358190  
0.3879331361546917 0.8317195083468534 0.6493353471488706  
0.4471044711169272 0.8286873120788246 0.8473559036764771  
0.6172576247432280 0.3566585225842641 0.3159707464098224  
0.5525088253214543 0.6713355739268975 0.8463418295382622  
0.3846264694790385 0.1722951481702263 0.3570481865168288  
0.5559969013163985 0.8286825639666586 0.8493682669450868  
0.3825247539927421 0.3388372357995399 0.3460586970776167  
0.4437636307551084 0.6717781715446927 0.8423457507113304  
0.6765441449728691 0.0907001415884558 0.2281426417557999  
0.5512008106093399 0.1667202295775130 0.1484936894027966  
0.3846415264443240 0.6745242129263427 0.6450889703924254  
0.4390694772348667 0.3311960685235321 0.1309398018751005  
0.6166977608256494 0.8257770074161912 0.647806777423361  
0.9995131215292036 0.2515346842256698 0.1894744884748418  
0.1663371712218787 0.7526704002657981 0.6887637035212106  
0.3335428595827209 0.7523601588485780 0.8153729426078803  
0.1642008992907236 0.2513218138129293 0.3205819744496709  
0.1088522600761491 0.1712861492269374 0.1553702702046680  
0.2758368530874261 0.6745951331579456 0.6510093803745859  
0.2202974434920637 0.3299433311450730 0.1518808359120778  
0.0527172719777500 0.8314335136475324 0.6570109795570029  
0.1124370531256846 0.8315997957045207 0.8532933494568844  
0.2740586529585314 0.3308018115443682 0.3542483721212292  
0.2215822635299715 0.6732737684202698 0.8561575583318262  
0.0528475621003287 0.1712998388484277 0.3569672475360200  
0.2210232282056060 0.8328321887467216 0.8524457966591633  
0.0551227039253727 0.3310032237213283 0.3540115766638410  
0.1127552513759254 0.6727850338092255 0.8562246330258235  
0.2761323425772912 0.1711968008401843 0.3511604851340612  
0.2172570768054067 0.1712411893494535 0.1560775289689183  
0.0563030519931367 0.6724276452467689 0.6536697438692007  
0.1116468011888694 0.3309960161166903 0.1525584547139074  
0.2792051266212672 0.8324026614595569 0.6540554366060630  
0.5667384152921182 0.1967369956755110 0.5817695995564486  
0.5989345567725571 0.2077475032448430 0.3732025835319020  
0.4991572714544014 0.3419736559133129 0.4983426076111360  
0.4838449546658526 0.3045608240459812 0.5974926732812298  
0.1631977663272247 0.1429183666907264 0.1300504242556951  
0.3298469049510508 0.6465442190376096 0.6229025388768966  
0.1658525909512512 0.3589005938498044 0.1271936832357436  
0.3331656610489350 0.8600514027532372 0.6265340202270197  
0.1665238440952382 0.8603581605148668 0.8781952371300595  
0.0008526067904965 0.3599232164593440 0.3791974251215091  
0.1672487337930351 0.6446810837295830 0.8808574698418989  
0.9985359711961829 0.1435211231712584 0.3828388567973254  
0.1638274749718167 0.070419019057031 0.0644900843540425  
0.3285412156896826 0.5738908106542876 0.5578728277381692  
0.1664109960413809 0.4322239574437642 0.0629235702953354  
0.9978719524112075 0.9320392340893272 0.5669986936379254

0.1657563550025720 0.9330409560476818 0.9436936154927579  
0.3270591487715567 0.4362018623479197 0.4390137300227308  
0.1671072977152231 0.5711179234022161 0.9447992430988307  
0.9982185802404177 0.0702857046079514 0.4473952580517460  
0.1067586555065202 0.0345581674629590 0.0329330130644528  
0.2705416159110818 0.5398580435338046 0.5268651678033051  
0.2239958714542919 0.4692090110951347 0.0373090460477832  
0.0554034989388101 0.9689907141631485 0.5407959987795350  
0.1076987861023381 0.9673340842263154 0.9736888827882175  
0.2697302786565514 0.4723535661619808 0.4683592618692526  
0.2243553897530239 0.5370597041347571 0.9794774990444866  
0.0555773035470953 0.0365738981523583 0.4823279433414331  
0.2228343170524066 0.9688492137965981 0.9752880444189062  
0.0589540555417909 0.4676794303446178 0.4749105563790367  
0.1095190624249959 0.5340911098918070 0.9703467533750495  
0.2733762158547232 0.0342943693758364 0.4728217092462697  
0.2218943142720088 0.0361000338749941 0.0344892679493722  
0.0592092278692099 0.5350457763207532 0.5338690686117543  
0.1091374197016779 0.4662272667767644 0.0281399021741133  
0.2743287115593935 0.9668439512908424 0.5314041198174931  
0.4975674219110533 0.1377172160038133 0.1246538762848924  
0.6703494631813008 0.6411865658636845 0.6340452104530909  
0.4938400566785306 0.3587315125756197 0.1072446877250559  
0.6725865291465514 0.8508670601584710 0.6255837295283401  
0.5012734061847863 0.8563177036967131 0.8740770054150884  
0.3273793690658989 0.3631083534345592 0.3750605790855651  
0.4978929038686994 0.6431337063784044 0.867775955433810  
0.3300190232253022 0.1432218330587139 0.3785969789979275  
0.4979539215535025 0.0643417816458120 0.0615047365770192  
0.6712801262683177 0.5703067808771034 0.5656769292032670  
0.4951019946233461 0.4310917088632149 0.0429234045479474  
0.3324100897307995 0.9326613965883707 0.5613590615485636  
0.5003550400447119 0.9280576899457347 0.9407458324334957  
0.6720534713515307 0.4374383979418386 0.4368995202544336  
0.4968946461160564 0.5694103502436686 0.9289999063469950  
0.3305919850535532 0.0701707511699883 0.4423798250226304  
0.4412190405840026 0.0329131535058994 0.0200800075259707  
0.6140610964765005 0.5397511385798323 0.5250687890727546  
0.5533791256993011 0.4664711123610567 0.0177758584327296  
0.3896072098111651 0.9684293097612796 0.5304133005100279  
0.4424358310461385 0.9658228465127449 0.9608361381011116  
0.6144722462903097 0.4747854068045700 0.4613672868833989  
0.5541595988517597 0.5346830529486911 0.9615642243492074  
0.3887208242222148 0.0359192162227855 0.4720490747236928  
0.5569323474138692 0.9593721920547807 0.9830045992707481  
0.3850431760647584 0.4700600686622919 0.4703254566981772  
0.4387417620622613 0.5335376365020734 0.9532313263281591  
0.6394214373610516 0.9931414735900363 0.3990473358654360  
0.5558968497006729 0.0262735685907475 0.0427657840953329  
0.3857083386969662 0.5375765704127266 0.5285170584664155  
0.4378013605679718 0.4653775742856375 0.0094093970780792  
0.6310572605217887 0.9342451390449168 0.4729312185570594  
0.8371987729057856 0.1453617305215597 0.1245151637894391  
0.0018289400735048 0.6434357120347495 0.6300299873637126  
0.8322574916217343 0.3594031462912236 0.1346898201596942  
0.9982233099900899 0.8591057443522225 0.6321709825882311  
0.834001447732549 0.8575500007884936 0.8848926793369430  
0.6703464140290731 0.3680014761839219 0.3654402726760066  
0.8363015856398307 0.6422390538456444 0.8857704981561070  
0.7002216625877590 0.1015756529115063 0.3203972649398912  
0.8363582667016445 0.0718099522905855 0.0612371025502847  
0.0018263545439395 0.5704673505862166 0.5647942624860076  
0.8331790456580526 0.4321173981817482 0.0700990573517953  
0.6780669637164339 0.9183032427878913 0.5516241746748193  
0.8346084938630568 0.9317752145916780 0.9467917270502655  
0.0013034173857446 0.4326558034913995 0.4444573809208601  
0.8356241571569517 0.5696666335638328 0.9508784761501687  
0.6931348948927067 0.0404747564787240 0.4055166959278562  
0.7783425959169007 0.0378815391782056 0.0301687492778184  
0.9441604028145139 0.5354414407411742 0.5343338508081068  
0.8914080958974081 0.4653705479777839 0.0387223206191462  
0.7318572179865435 0.9654856722056128 0.5580471326562338  
0.7775942599452194 0.9693118315392445 0.9741737861187810  
0.9438893195989936 0.4680369291053718 0.4754333874835724  
0.8926009454124837 0.5327925650566194 0.9801236565101160  
0.738890074250793 0.0270570755534795 0.4880223570406556  
0.8926078232518353 0.9658352816520374 0.9777981779050370  
0.7292994107574832 0.4672129037957234 0.4787313005408625  
0.7774119883793357 0.5363811941060910 0.9823335933164105  
0.9407202629607034 0.0331668234573906 0.4732020778782953  
0.8934330238549546 0.0342561395395677 0.0339931707669925  
0.7288738811299222 0.5328560003767475 0.5416721516626707  
0.7761802805689408 0.4689149996519795 0.0408036548503000  
0.9405014877571003 0.9656169625990051 0.5318285036859051  
0.9989753316535686 0.2283701452484571 0.1174658015974590  
0.1663962297769644 0.7307291441903365 0.6159434890213160  
0.3349514968448242 0.7389388800155121 0.8923481204382746  
0.1641070814349751 0.2723314920660276 0.3939604592791779  
0.0612208695519793 0.0599940321899481 0.0557907116959528  
0.1003867566858652 0.9438647851289398 0.5673676903003284  
0.2243072956571143 0.4469769736702995 0.4446825556744686  
0.2696050408233389 0.5646067372793541 0.9604315238444813

0.2683071609557206 0.9431271210863924 0.9526775677902232  
0.1040267308024289 0.4413849140694596 0.4514239002720813  
0.0645634857597233 0.5592598845956646 0.9437382558944403  
0.2279966448755231 0.0600698235786920 0.4498257676339353  
0.2666213557085956 0.0629611576933963 0.0585991242166955  
0.1044728021870820 0.5610144977511609 0.5570429840613504  
0.0639205390791820 0.4385701543402630 0.0471498126691344  
0.2296586515311721 0.9396322718836813 0.5549609913551391  
0.2257214741977507 0.5670100496605818 0.5496777635158806  
0.0629736325057726 0.9404395698154825 0.9496535886388223  
0.2689953687359398 0.4441915239157620 0.06397289104191999  
0.1007082373111582 0.0642812550061062 0.4628798525513194  
0.3297810265514291 0.2789330994443185 0.1163614294493614  
0.5020951308457299 0.7624805395877589 0.6038511317912769  
0.6648688499443011 0.7712728551453657 0.8959658180083645  
0.4967204493503152 0.3032942373567299 0.4377119684974127  
0.3960735348205187 0.0619722639335197 0.0345410320539990  
0.4350433813897178 0.9426916691216470 0.5532037469935557  
0.5697284922015392 0.4515761647112180 0.4307443901996766  
0.5993733225339345 0.5621085437393559 0.9419890201329270  
0.6021502176187710 0.9305308267810816 0.9683374059557851  
0.4298115499469371 0.4418801154423425 0.4505080350500262  
0.3942207165710588 0.5598510413623146 0.9269610460429457  
0.6044231372325332 0.0033839858268347 0.3345142618893122  
0.5999920209100990 0.0494569904670484 0.0765122978030961  
0.4310727722477432 0.5627842350701215 0.5528470671462584  
0.3924776572157909 0.4380384833923964 0.0282687694462005  
0.5886993518492326 0.8986039614850257 0.4683272626755102  
0.5690567524294980 0.5677746445826760 0.5442490463920004  
0.3982835213436490 0.9418582516357463 0.9285481349602267  
0.5979236692016499 0.4398912665642750 0.0433010719531747  
0.4334441660312685 0.0630043965776197 0.4484374993012806  
0.6637181203075327 0.1855389187068063 0.1736782223771466  
0.8335326677934793 0.7685711837613557 0.6213688536035773  
0.0016734047811056 0.7357143689945006 0.8985375505864966  
0.8342903399834981 0.2248536680753839 0.3923607573671081  
0.7335952540038144 0.0654018310037547 0.0522275148068760  
0.7683959051174035 0.9535666590736024 0.6194050452381799  
0.8986825727293914 0.4418518399465746 0.4524078938061732  
0.9381363850334309 0.5576585166529313 0.9559346115815176  
0.9373351633487021 0.9376376721869023 0.9571985177284986  
0.77420577546660123 0.4384831270693494 0.4609289371607243  
0.7328709415231892 0.5642888796448066 0.9598665708544376  
0.8956737216958649 0.0577698986671455 0.4459754061135930  
0.9388981081912862 0.0593487729675966 0.0580712731549929  
0.7734833556099924 0.5559931146788686 0.5733958161288187  
0.7306750650800284 0.4437638128090398 0.0645419840617671  
0.8952326863261850 0.9380679929409185 0.5508064832757795  
0.8991575745923646 0.5619818916308847 0.5576837469133334  
0.7320865309255246 0.9439725384395750 0.9508686131089272  
0.9359450596355842 0.4374138982518332 0.0611384835724634  
0.7795112641024403 0.0644015137672499 0.4957989474224694  
0.5574023111158996 0.1448367959373159 0.6003859475603001  
0.6461300898767358 0.2026603122320529 0.3760681117869451  
0.5773845228227364 0.1976721929295523 0.5016054162023732  
0.5141046870309660 0.2587497744006755 0.5967622049026631  
0.4149740966761010 0.2524899002628168 0.2490164429643569  
0.5784312493557998 0.2602329692954696 0.2493583077553240

Structure H2O2+H2O/3 monomeric Fe S=3/2  
1.0000000000000000  
20.9172000884999996 0.0000000000000000 0.0000000000000000  
0.0000000000000000 17.8076000213999990 0.0000000000000000  
0.0000000000000000 0.0000000000000000 12.2158002853000003  
Al O C H Fe  
11 64 96 64 1  
Selective dynamics  
Direct  
0.4104093241138671 0.2544445961192912 0.2500608839937299 T T T  
0.0818988533222438 0.2513287353425682 0.2543812281041866 F F F  
0.2500863176364803 0.7539337061533686 0.7516599565096556 F F F  
0.2466858498439422 0.2510384428340444 0.2517764791892603 F F F  
0.0837306198441112 0.7524524892058366 0.7540082390572778 F F F  
0.5845903341972516 0.7495290156227341 0.7535860376562482 F F F  
0.4167293213758754 0.7526526799709714 0.7476390618891529 F F F  
0.7526329400186498 0.2486804416115405 0.2521744472864285 F F F  
0.9177095071488992 0.7496637329972202 0.7581893093390519 F F F  
0.9170736423438086 0.2517499728966257 0.2560050186370617 F F F  
0.7518084878274252 0.7471450035195630 0.7633231489076593 F F F  
0.6664719165386330 0.2418785082348762 0.1905433370419587 F F F  
0.8347675874746585 0.7480821861881068 0.6951805195500995 F F F  
0.0011429600679662 0.7506132100675487 0.8215897258491225 F F F  
0.8342779010533832 0.2502053134449298 0.3215977375079149 F F F  
0.7839847205365444 0.1769780761229356 0.1432540910036479 F F F  
0.9476770117995983 0.6706739346915285 0.6565301768726002 F F F  
0.8860482869419002 0.3295989924344980 0.1579240118409047 F F F  
0.7251304147061646 0.8229329412431028 0.6600255565411999 F F F  
0.7794137339353853 0.8287183717813775 0.8618443980007058 F F F  
0.9467133216701598 0.3321605295857069 0.3532233849751734 F F F  
0.8906236411330823 0.6694671598670681 0.8583203057272968 F F F  
0.7298652445278293 0.1628957256143195 0.3494578412869060 F F F  
0.8882581121621129 0.8285689482042784 0.8600259196351203 F F F

0.7172719575366884 0.3250326443285090 0.3587096425694725 F F F  
0.7819868193857573 0.6709606856531423 0.8625920856097125 F F F  
0.9442815828290847 0.1727326591296645 0.3587194182452933 F F F  
0.8921198359779083 0.1709641957488230 0.1539344069858686 F F F  
0.7236208420689039 0.6667659832078741 0.6664294694653989 F F F  
0.7774692559223837 0.3333268804287570 0.1634589924502592 F F F  
0.9441638470674150 0.8301677067537341 0.6577196103676499 F F F  
0.3291027710607182 0.2513040823604129 0.1835565851230143 F F F  
0.5012400040743685 0.7516755923388345 0.6848737084697376 F F F  
0.6667063585211181 0.7492430432877910 0.8251279155768643 F F F  
0.4971554313185557 0.2645189728194332 0.3118011715030182 T T T  
0.4421672679569255 0.1713027072431572 0.1557153628910797 F F F  
0.6151301137996441 0.6703068157595737 0.6568691288467718 F F F  
0.5481975015244345 0.3291297980160337 0.1352997275648136 F F F  
0.3888838415690756 0.8328308496299286 0.6497663868701719 F F F  
0.4467782577477948 0.8310680687734404 0.8499835568722389 F F F  
0.6124634703404297 0.3540453059286506 0.3249990995323486 F F F  
0.5519675551900463 0.6708226202097691 0.8495495707688221 F F F  
0.3862172519471798 0.1759620489801108 0.3515922408062622 F F F  
0.5555969206085649 0.8305521158398292 0.8534790315637437 F F F  
0.3826618390271648 0.3356281893356154 0.3439671713711476 F F F  
0.4433270807081229 0.6718794010108482 0.8451293555695543 F F F  
0.6781773152591910 0.0885007510113738 0.2269775195372290 F F F  
0.5507102711942835 0.1661898936307438 0.1613346288393700 F F F  
0.3856377450095039 0.6744962636556977 0.6456255314331756 F F F  
0.4391962121145454 0.3300048017075028 0.1423849657817939 F F F  
0.6162183580336418 0.8260006936885986 0.6503153093414653 F F F  
0.999555292151650 0.2515623001370386 0.1893507131827761 F F F  
0.1667510491511663 0.7529014027147838 0.6871629373406165 F F F  
0.3336390871177102 0.7530765539244442 0.8149675167993635 F F F  
0.1647558287221713 0.2513912067065576 0.3190290432048002 F F F  
0.1089481429290231 0.171338116267527 0.1546780975477304 F F F  
0.2768514010752057 0.6747165960888140 0.6493786792809999 F F F  
0.2198898034476002 0.3301939697890077 0.1499439159175964 F F F  
0.0527237133124032 0.8314191785204912 0.6564171482982104 F F F  
0.1126692912773208 0.8316017472469142 0.8522630751741076 F F F  
0.2743062052825778 0.3314594573724534 0.3528853615581156 F F F  
0.2220060260865537 0.6735657489908178 0.8546976610526684 F F F  
0.0529540417839698 0.1713635924147781 0.3566148668913200 F F F  
0.2212466911756650 0.8332425614875945 0.8505907821989780 F F F  
0.0552096197411558 0.3309640746006508 0.3537884670582159 F F F  
0.1131781221794554 0.6731799847137836 0.8550356951075599 F F F  
0.2777835505194446 0.1723936857474158 0.3501699934920666 F F F  
0.2174066067473106 0.1713145256208506 0.1547094202338499 F F F  
0.0564151296849218 0.6725482090092569 0.6530180869686149 F F F  
0.1112404900369484 0.3315002557823306 0.1519170429468559 F F F  
0.2801994708895990 0.8337000178053344 0.6522863375694499 F F F  
0.5619110117619326 0.1945667163947459 0.5798421040745787 T T T  
0.6019869864837517 0.2039992739460246 0.3730146886532921 F F F  
0.5041197767632900 0.3416211498868676 0.4879114533493001 T T T  
0.4780819525813017 0.3038846686188682 0.5794532863875211 T T T  
0.1632857535649137 0.1429704939908518 0.1292557383351181 F F F  
0.3310101614868657 0.6464296070218509 0.6222084419692280 F F F  
0.1654482839427374 0.3592927490586888 0.1261317001404407 F F F  
0.3343309474143652 0.8614296613258219 0.6257349247057036 F F F  
0.1667394131015527 0.8604749233750439 0.8769742745615687 F F F  
0.0009637764549595 0.3598755006103573 0.3789597892215113 F F F  
0.1676740340315845 0.6450592129630408 0.8796952179263755 F F F  
0.9986615583275551 0.1436814650254803 0.3826595644976365 F F F  
0.1638316940991871 0.0702969948064833 0.0639332946701217 F F F  
0.3300010970520475 0.5735504103596440 0.5569204555487062 F F F  
0.1660815076925601 0.4327474300188570 0.0621109437078928 F F F  
0.9978644963941932 0.9321247900298957 0.5668064082164861 F F F  
0.1658938939710026 0.9329560921293591 0.9429358099235685 F F F  
0.3287018831125366 0.4353810092333603 0.4375486213587294 F F F  
0.1673256601014614 0.5716241176223207 0.9439352766020335 F F F  
0.9982988481277033 0.0704305732022590 0.4472719000352825 F F F  
0.1068053660340595 0.0343504487978734 0.0323942045583365 F F F  
0.2720981595607057 0.5388872707373267 0.5266262465437279 F F F  
0.2238000071010475 0.4695390804189898 0.0367557851796576 F F F  
0.0554162333494190 0.9690609109777881 0.5406527876435518 F F F  
0.1078079654008306 0.9671441191642103 0.9730698976904080 F F F  
0.2714478022723839 0.4713557402387991 0.4680638589427630 F F F  
0.2244274364344960 0.5373821187176659 0.9789145565816995 F F F  
0.0556347313968288 0.0366647361065020 0.4822211501488738 F F F  
0.2229287424448003 0.9687616631454716 0.9747263550357843 F F F  
0.0590739335855019 0.4676232979088013 0.4747399630913733 F F F  
0.1095960047789575 0.5348388069606571 0.9693990087858140 F F F  
0.2760285216431484 0.0366898281289849 0.4710729565002794 F F F  
0.2219075954094123 0.0359688027585108 0.0340088712861046 F F F  
0.0593255810867817 0.5350031909263251 0.5336767601383627 F F F  
0.1089496087953989 0.4669849301073938 0.0272245128602577 F F F  
0.2764421507261829 0.9691523767236632 0.5296725271574445 F F F  
0.4954895588971340 0.1405991470284178 0.1333283174201654 F F F  
0.6696446806512739 0.6411736328166526 0.6349692814108394 F F F  
0.4929862478953098 0.3574430360381271 0.1133627221371256 F F F  
0.6721314910928911 0.8506141221537860 0.6270372355836997 F F F  
0.5008659079432576 0.8586879830360346 0.8773163697153521 F F F  
0.3283892783520201 0.3621464711366329 0.3735626004137274 F F F  
0.4972278308421920 0.6425791761388950 0.8706714670909577 F F F  
0.3323525156523957 0.1456756560181276 0.3761278598405795 F F F  
0.4968957624677088 0.0677353715081281 0.0676908944808972 F F F

0.6701249255836714 0.5705000449265398 0.5655796340830079 F F F  
0.4938610650401714 0.4295867988259019 0.0476107306261326 F F F  
0.3341865842623122 0.9343831330645855 0.5603660959734142 F F F  
0.4997723434919408 0.9312102982391295 0.9442346464005524 F F F  
0.6696212939658750 0.4371150914492787 0.4372811161228682 F F F  
0.4959205698863585 0.5683144935014539 0.9317918029862184 F F F  
0.3333529536197375 0.0726110338100270 0.4407416055529083 F F F  
0.4404536908567778 0.0363222596082124 0.0246315787998128 F F F  
0.6126636340561831 0.5403005200927851 0.5255326781284140 F F F  
0.5520579531056100 0.4649610040613297 0.0212514004063422 F F F  
0.3915076909168178 0.9701329586079481 0.5296565785824825 F F F  
0.4419528000812676 0.9693660957676329 0.9645218698574780 F F F  
0.6123694093819125 0.4750273161622687 0.4623373409700307 F F F  
0.5530007587748997 0.5330799880808712 0.9645053718027299 F F F  
0.3911133820137067 0.0377408613279187 0.4710851925922981 F F F  
0.5560298338174476 0.9628238480137128 0.9875042364821240 F F F  
0.3866085883699881 0.4698292885641848 0.4680390260639342 F F F  
0.4378307760943940 0.5322804393994858 0.9566423117312155 F F F  
0.6399034624506896 0.9922025123831801 0.3990742187206848 F F F  
0.5548082951645981 0.0294398375301057 0.0484186999877920 F F F  
0.3871373128702942 0.5374751847533474 0.5263456500798469 F F F  
0.4367478794434021 0.4642433582031771 0.0136952273730202 F F F  
0.6310560667908831 0.9337312874423418 0.4735231241308639 F F F  
0.8376285695467089 0.1453236628010188 0.1236065416309273 F F F  
0.0019438455604615 0.6434337557807694 0.6296831327300580 F F F  
0.8321232068860454 0.3596078796760338 0.1355008242880800 F F F  
0.9982043682861885 0.8591267138285872 0.6318173779835092 F F F  
0.8341173829775954 0.8573064587531221 0.8848426331674659 F F F  
0.6677518362928438 0.3659716274983111 0.3684889811042567 F F F  
0.8363214891233852 0.6420971250468313 0.8858140831620105 F F F  
0.7014283953354905 0.0996939130193013 0.3192565721931331 F F F  
0.8367779101451660 0.0717137679841571 0.0605398850023420 F F F  
0.0019444225133043 0.5704311950876146 0.5645831359818487 F F F  
0.8330891574142427 0.4322429782918817 0.0706860068265698 F F F  
0.6778608873589036 0.9177658151903998 0.5525694498168150 F F F  
0.8348189042370535 0.9315689260123392 0.9465471707463990 F F F  
0.0014175256335776 0.4326037588516485 0.4442910283576325 F F F  
0.8356104810098728 0.5696012935904591 0.9510469294741171 F F F  
0.6938590668385274 0.0391666398073340 0.4052449049761080 F F F  
0.7787094231662195 0.0378874856165581 0.0295439057721154 F F F  
0.9442741493522462 0.5353852724487069 0.5341819265432193 F F F  
0.8913391142232996 0.4653936008830613 0.0391907304231864 F F F  
0.7318925902695526 0.9646007320707355 0.5587309471413917 F F F  
0.7778522143903501 0.9692374548418954 0.9738013927876423 F F F  
0.9440080658628531 0.4679789291434986 0.4752977992967118 F F F  
0.8925687673746907 0.5327365964483235 0.9803961576201772 F F F  
0.7388550516705195 0.0258268634489127 0.4881812659725853 F F F  
0.8928738888825833 0.9655334078774302 0.9774753591506666 F F F  
0.7272987207795154 0.4670070478094885 0.4773689216021140 F F F  
0.7773720716369255 0.5363779380842004 0.9825246106273866 F F F  
0.9407866142446863 0.0333413545207506 0.4730828312166437 F F F  
0.8938037345241483 0.0340117589609648 0.0335032863293421 F F F  
0.7274205028056997 0.5326404475140620 0.5404548817732788 F F F  
0.7761064394954431 0.4690003562492606 0.0411990274056322 F F F  
0.9405180305434371 0.9657715528262187 0.5316659950373008 F F F  
0.9989787262345047 0.2283073141141116 0.1174032465022350 F F F  
0.1665984788974626 0.7305721067596522 0.6145837307723809 F F F  
0.3343359645236816 0.7380475352674551 0.8913616378424365 F F F  
0.1650279826303489 0.2723337971818154 0.3924532382206465 F F F  
0.0612385234110562 0.0597216065841408 0.0552515205953483 F F F  
0.1003908243706135 0.9438994813046833 0.5672048276641348 F F F  
0.2260036026444396 0.4456659550723714 0.4451921127851435 F F F  
0.2697829006523094 0.5647544105396776 0.9600584308265212 F F F  
0.2684207179711606 0.9430653389412811 0.9521458035965438 F F F  
0.1041507288540160 0.4413409701206703 0.4512518413366564 F F F  
0.0647365319376547 0.5601658123684956 0.9426483962140608 F F F  
0.2307181704474317 0.0625485329839890 0.4478197047250845 F F F  
0.2665873495381561 0.0628604316293035 0.0582806923189452 F F F  
0.1045948656982461 0.5609758991489784 0.5568193855190344 F F F  
0.0636393078864543 0.4394973047452027 0.0461262908526905 F F F  
0.2314621703993041 0.9423670518763032 0.5525981851219015 F F F  
0.2271499556253218 0.5655082155599445 0.5500435947061675 F F F  
0.0631048477159055 0.9402141022910158 0.9490054420194483 F F F  
0.2686612683686604 0.4442977022035990 0.0636577400554970 F F F  
0.1007891626412558 0.0643293485701051 0.4627989490124591 F F F  
0.3279565443922152 0.2718510898500739 0.1099250627175579 F F F  
0.5024926732274295 0.7644833490574641 0.6076506282674856 F F F  
0.6652934735037519 0.7712107745609131 0.8978841505520307 F F F  
0.5019763431928992 0.3045689991044091 0.4219869960868640 T T T  
0.3950640827759671 0.0649488731807395 0.0388085973676837 F F F  
0.4368618291752924 0.9442663337288906 0.5526718912372246 F F F  
0.5672589781043982 0.4520149595537220 0.4330430597220314 F F F  
0.5984101832413273 0.5600370243463217 0.9448191813473557 F F F  
0.6014791069472594 0.9343904795875844 0.9731493247144414 F F F  
0.4314718063498759 0.4420218288325373 0.4473436172306080 F F F  
0.3932037238216068 0.5583878898409580 0.9303955222103895 F F F  
0.6050999458113040 0.0023721821869316 0.3342038719755678 F F F  
0.5990649438684841 0.0517542076233255 0.0827742375443776 F F F  
0.4325406874046536 0.5630102766091483 0.5497933019391112 F F F  
0.3912452816134078 0.4373916018988950 0.0329917629666880 F F F  
0.5885067901193111 0.8984003396660754 0.4689619605546795 F F F  
0.5678670341470493 0.5686930356769437 0.5449869130347267 F F F

0.3977125569104771 0.9457689641531672 0.9319491609223505 F F F  
0.5966986268971937 0.4384412592166385 0.0464465080935454 F F F  
0.4361326968781256 0.0642996604099366 0.4477664830496124 F F F  
0.6636783858036992 0.1881204027336736 0.1691542970439670 F F F  
0.8333148021149981 0.7685759004498678 0.6215328770191348 F F F  
0.0019849674527563 0.7360195798765474 0.8981531236998705 F F F  
0.8337461020402444 0.2231629608513899 0.3907308475751279 F F F  
0.7340304345413955 0.0655340193302436 0.0516322857912428 F F F  
0.7683122989020532 0.9526894183494363 0.6202966002937913 F F F  
0.8988022563817779 0.4417749861641909 0.4522933918140026 F F F  
0.9381150230011741 0.5575478574314090 0.9561480687488029 F F F  
0.9375530199404736 0.9372119246941963 0.9569487257428122 F F F  
0.7720169162909301 0.4379963649600427 0.4591201101621394 F F F  
0.7328428498972599 0.5642585698576639 0.9599108671306382 F F F  
0.8957504033849659 0.0579787809575123 0.4458715069947488 F F F  
0.9392933511252934 0.0590374368060367 0.0575911096424520 F F F  
0.7723355783538679 0.5552312615188342 0.5717938574146189 F F F  
0.7305890121476963 0.4438501165070861 0.0648828463056574 F F F  
0.8952304603944157 0.9382522064146173 0.5506106041924070 F F F  
0.8992780789372006 0.5619334887664138 0.5575603320953491 F F F  
0.7323101052763548 0.9439405505493852 0.9505849591143161 F F F  
0.9358599936405483 0.4374291349205066 0.0616697354715399 F F F  
0.7801490578889627 0.0629182868423115 0.4958812365891561 F F F  
0.5505551278713515 0.1429325900462238 0.5967656285116409 T T T  
0.6494482871184388 0.1999257597235342 0.3709633546219351 F F F  
0.5764395449414127 0.1949799993934312 0.5017199493710759 T T T  
0.5077500934874377 0.2582372976117356 0.5863061163659438 T T T  
0.5746036621532822 0.2571069276157684 0.2553565209888146 T T T

Structure TS14 S=4

1.0000000000000000  
20.9172000884999996 0.0000000000000000 0.0000000000000000  
0.0000000000000000 17.8076000213999990 0.0000000000000000  
0.0000000000000000 0.0000000000000000 12.2158002853000003

Al O C H Fe

10 64 96 64 2

Selective dynamics

Direct

0.0810873618835046 0.2510497120876849 0.2549117980927491 F F F  
0.2495852705801553 0.7534359562321455 0.7539796695459628 F F F  
0.2451723563634047 0.2502794205477770 0.2543908196390490 F F F  
0.0834315668701038 0.7522752310420415 0.7547339468456968 F F F  
0.5849279903081595 0.7493822654254174 0.7500699051828050 F F F  
0.4166141612711698 0.7520166890480411 0.7461435701870300 F F F  
0.7529584157780533 0.2498715801323144 0.2534253218660680 F F F  
0.9176296905710757 0.7497732782442128 0.7584053476162609 F F F  
0.9169253991750139 0.2517993296521723 0.2558896862699456 F F F  
0.7519538437864668 0.7475548182647103 0.7629561941808944 F F F  
0.6651104455883896 0.2410991741956394 0.1921036208212854 F F F  
0.8349260933847091 0.7483068459500117 0.6951964700684812 F F F  
0.0009504178679052 0.7505721579834059 0.8219923892750671 F F F  
0.8348154961479963 0.2504235757554625 0.3216508444936395 F F F  
0.7837116937590025 0.1768024428002803 0.1449004508526457 F F F  
0.9475445030042096 0.6706773968572932 0.6566670307859255 F F F  
0.8863707533927183 0.3298840706674184 0.1577166417647078 F F F  
0.7257678340426423 0.8236416218946516 0.6594147062987687 F F F  
0.7794500819018566 0.8289942091920821 0.8617333896038204 F F F  
0.9464710256832447 0.3321867330029988 0.3534252133318390 F F F  
0.8906435917938467 0.6697095442388274 0.8584504840476441 F F F  
0.7294648674283195 0.1647591440897855 0.3510059151015810 F F F  
0.8882838742122416 0.8288186369953507 0.8601835220002698 F F F  
0.7206146967352822 0.3262610870606153 0.3574791793035601 F F F  
0.7820165036387579 0.6712364931409667 0.8625758971910145 F F F  
0.9439897316953250 0.1725066715832853 0.3588320411729740 F F F  
0.8919394202160689 0.1712388568816650 0.1538230561323672 F F F  
0.7241926822808580 0.6674207518028297 0.6660289056383562 F F F  
0.7777736559527071 0.3327342116751169 0.1613180812637651 F F F  
0.9441688291903176 0.8300691008248648 0.6578773787558987 F F F  
0.3292191258617763 0.2506147647903916 0.18556591666312265 F F F  
0.5010817091658595 0.7510201301779347 0.6814546995672686 F F F  
0.6669444289396935 0.7493204756425627 0.8232743542751848 F F F  
0.4949306964635408 0.2659743482730352 0.3122105125444345 T T T  
0.4432590905469169 0.1656501975618667 0.1513869861874042 F F F  
0.6157390576106678 0.6704445682739362 0.6545147380046004 F F F  
0.5492382120832247 0.3296695992763361 0.1339205718838485 F F F  
0.3876771870960667 0.8317168718991823 0.6492216971278353 F F F  
0.4472525420178783 0.8290425910877417 0.8473717027037466 F F F  
0.6181564642318946 0.3574690287950233 0.3154614873883403 F F F  
0.5525852392238875 0.6712375969111193 0.8462250263186561 F F F  
0.3842251860543797 0.1724257017160227 0.3578804149880597 F F F  
0.5561221507205261 0.8288212173734593 0.8491443546492263 F F F  
0.3814346414626115 0.3393895701855598 0.3462460604245834 F F F  
0.4438555883087858 0.6715784444630231 0.8426216550861696 F F F  
0.6773190175172203 0.0907320089000052 0.2287333111785728 F F F  
0.5516438925525335 0.1664490573861244 0.1530394213779829 F F F  
0.3844948144354845 0.6743881336536859 0.6453843624561060 F F F  
0.4399416236328904 0.3310138484032521 0.1322320326229303 F F F  
0.6168913389090491 0.8258836948907629 0.6476576721945193 F F F  
0.9992081686253087 0.2515078949020264 0.1893445016673638 F F F  
0.1662891086530536 0.7525682444770823 0.6888437778230170 F F F  
0.3335751018533344 0.7524145565122708 0.8156312915023989 F F F  
0.1635604885220161 0.2512240832074184 0.3205029091496527 F F F

0.1082103578927160 0.1712550714822783 0.1550961758953662 F F F  
0.2756816645289533 0.6745762857711242 0.6516333212519072 F F F  
0.2196609698534431 0.3297399580890001 0.1516848229650662 F F F  
0.0527127505626410 0.8313346562728938 0.6568404331219853 F F F  
0.1122688292547167 0.8314383329510378 0.8531610450611424 F F F  
0.2730203633925612 0.3310058629711179 0.3543786312007740 F F F  
0.2214492745972123 0.6732521114024834 0.8564738533297458 F F F  
0.0525915687340515 0.1711668924552256 0.3568354077886227 F F F  
0.2208544321494017 0.8327597585524984 0.8526980507439106 F F F  
0.0548965543481472 0.3309110643105697 0.3540488036380793 F F F  
0.1126192338540264 0.6727666868835627 0.8560826012867366 F F F  
0.2755622862850018 0.1713880763448756 0.3508292933902695 F F F  
0.2166332905257562 0.1713889093988072 0.1557090142109629 F F F  
0.0562741244680467 0.6723687018948326 0.6535331917567362 F F F  
0.1109874286607351 0.3309360275482263 0.1524027647478263 F F F  
0.2789600423429803 0.8322295140601597 0.6542305232136414 F F F  
0.5593015921621493 0.1943421642452421 0.5716998999587833 T T T  
0.6009537559954410 0.2090880706714842 0.3743516581858159 F F F  
0.4972078131340699 0.3410383690618675 0.4776975971541552 T T T  
0.4852104466375411 0.3064066013907858 0.5763290172849184 T T T  
0.1625427408357609 0.1429511244680413 0.1297429089831965 F F F  
0.3296363885447349 0.6464858981499191 0.6234090826868908 F F F  
0.1651875047574265 0.3587642610931496 0.1270114326992697 F F F  
0.3328449664982784 0.8599486846581570 0.6264559275570605 F F F  
0.1662968192711460 0.8602380738995734 0.8782317479387345 F F F  
0.0006642688730238 0.3599158519287471 0.3792162053864487 F F F  
0.1670707902512234 0.6446536377894034 0.8808916894027021 F F F  
0.9982953258275629 0.1434242705327975 0.3828570213463962 F F F  
0.1631048498419077 0.0703816090182769 0.0642699185851470 F F F  
0.3280729814284626 0.5738436756302931 0.5584405420688228 F F F  
0.1657183792558641 0.4321203494909298 0.0627425700365549 F F F  
0.9978232684682808 0.9319468690984962 0.5669501599771181 F F F  
0.1653517384943299 0.9329238753234677 0.9436602423911680 F F F  
0.3260388181954994 0.4363239770884917 0.4395091918383471 F F F  
0.1667654221770150 0.5710606836800736 0.9447172762972826 F F F  
0.9980367554379868 0.0701975469480089 0.4474218071278173 F F F  
0.1060891623732090 0.0343736821523137 0.0326099133584421 F F F  
0.2699202299523193 0.5400337843446792 0.5277042275667014 F F F  
0.2233656301428653 0.4690010616926443 0.0372967910317996 F F F  
0.0553256439019449 0.9689503283601226 0.5407390186957599 F F F  
0.1072029473703608 0.9671033849328765 0.9734479313639071 F F F  
0.2688439887808158 0.4725574188285151 0.4691552343806222 F F F  
0.2239130758540213 0.5368635370056367 0.9795189782988487 F F F  
0.0554346288304188 0.0365423398679567 0.4822978377194218 F F F  
0.2223330736359159 0.9688514256826508 0.9753728230674099 F F F  
0.0588494773628199 0.4676361816611063 0.4748007477471035 F F F  
0.1090831929742038 0.5341590007416599 0.9700539938123853 F F F  
0.2725944407004306 0.0340763306835541 0.4725566382346784 F F F  
0.2212194693950167 0.0361241265020453 0.0344788051736558 F F F  
0.0591428237845548 0.5350052025025107 0.5337417153323898 F F F  
0.1085101823743599 0.4662714389448297 0.0278165056008532 F F F  
0.2737049905760784 0.9665829306609908 0.5311574362746683 F F F  
0.4980812633566956 0.1375583389917807 0.1275021639298046 F F F  
0.6704939449139218 0.6413906708756301 0.6340465648392311 F F F  
0.4948085443207333 0.3579022020001261 0.1080647035784494 F F F  
0.6728157196291562 0.8509964422568999 0.6257087615649866 F F F  
0.5014705735959240 0.8565993665566509 0.8740806445922260 F F F  
0.3262866802188640 0.3634253711394848 0.3753385690685818 F F F  
0.4980262606863377 0.6429196224086056 0.8678219313779749 F F F  
0.3295195424362305 0.1434243627330787 0.3784413357598311 F F F  
0.4988500591018266 0.0644222033519739 0.0631572465488190 F F F  
0.6716640520527974 0.5705523889303663 0.5656680397530920 F F F  
0.4960942130610846 0.4302067165144052 0.0428231048545058 F F F  
0.3318560555234100 0.9324954082907837 0.5610871844297449 F F F  
0.5008210476753945 0.9283057400610062 0.9410470238695936 F F F  
0.6730306251226565 0.4379452027886188 0.4364683681113704 F F F  
0.4972751887601490 0.5689900089193856 0.9289272057227791 F F F  
0.3297433238186969 0.0701159399581002 0.4420089647588270 F F F  
0.4420758592064544 0.0331119693647679 0.0215762593429432 F F F  
0.6146129155888147 0.5400500218182316 0.5243220792397167 F F F  
0.5541823958445207 0.4660036678150448 0.0174074382164662 F F F  
0.3889385926333020 0.9683860573987388 0.5299342591721512 F F F  
0.4430447328404128 0.9662162229973461 0.9617770442959070 F F F  
0.6153384012352561 0.4752106071685631 0.4603947538172335 F F F  
0.5546358378744003 0.5343562686283434 0.9613217309360351 F F F  
0.3878779440398787 0.0358597279470629 0.4715619035125798 F F F  
0.5574912330779824 0.9595038119243426 0.9832236910308012 F F F  
0.3841706874843140 0.4699790882916801 0.4704808372433362 F F F  
0.4393247637287985 0.5327147789062039 0.9533477503356806 F F F  
0.6401181980749371 0.9934745044541131 0.3993624467593619 F F F  
0.5566814278909717 0.0262507346323773 0.0435643623721873 F F F  
0.3851098574279348 0.5374070671033166 0.5287856344336817 F F F  
0.4386988787087134 0.4644433564400785 0.0093975122458190 F F F  
0.6315830629504759 0.9345445210537022 0.4731010574537748 F F F  
0.8373306801629283 0.1453918964319172 0.1243588450191382 F F F  
0.0017940010292961 0.6433745821364454 0.6299604123857918 F F F  
0.8324201770470196 0.3595146772708304 0.1344288063351584 F F F  
0.9982145928086439 0.8590077932856772 0.6320547738439544 F F F  
0.8341252426626653 0.8575439809533805 0.8849375077753550 F F F  
0.6712088557029574 0.3685378936255574 0.3649077718642175 F F F  
0.8363040310755920 0.6423496742228210 0.8858414658186859 F F F  
0.7009695901765767 0.1017310796494328 0.3208921787191983 F F F



0.8365351200084916 0.0717881832593577 0.0611848172034897 F F F  
0.0017760719562361 0.5704130393346176 0.5647614558025182 F F F  
0.8333362959992527 0.4322716246695109 0.0699967057604525 F F F  
0.6784747400849014 0.9184855214686394 0.5519334080237215 F F F  
0.8347604416224286 0.9317438890262437 0.9468270970876205 F F F  
0.0011712818659291 0.4326246335356174 0.4444760827272987 F F F  
0.8356548802768557 0.5698176603549783 0.9509442493572280 F F F  
0.6938781512062562 0.0407089899494508 0.4060994872607111 F F F  
0.7785166689129355 0.0378699565005647 0.0301515810892568 F F F  
0.9440869219851891 0.5353950066040056 0.5344289159323097 F F F  
0.8915442200363515 0.4655581396882837 0.0386159470619916 F F F  
0.7323405846982993 0.9655430287275095 0.5586049658362953 F F F  
0.7777531814278120 0.9692887971668824 0.9742008548415555 F F F  
0.9437789247451391 0.4679951290846844 0.4755422250810497 F F F  
0.8926709357990887 0.5329967492742895 0.9800752164164237 F F F  
0.7390438112465034 0.0271585113911783 0.4887015785449691 F F F  
0.8927717754286633 0.9657748184159232 0.9778227393773662 F F F  
0.730099095286755 0.4676170384993483 0.4791245437215750 F F F  
0.7774645870061718 0.5365224074682686 0.9824760596186479 F F F  
0.9405730125087004 0.0330312944410736 0.4732653716496458 F F F  
0.8936099953747032 0.0342046870809014 0.0339944515272990 F F F  
0.7293758903625829 0.5331695231631883 0.542274055122516 F F F  
0.7763009653893249 0.4690398233212321 0.0408808171181434 F F F  
0.9404169951431953 0.9654733512456772 0.5318588477441253 F F F  
0.9985949500221949 0.2278983899859668 0.1176434261313659 F F F  
0.1664697714623742 0.7306093634869057 0.6160378907565942 F F F  
0.3350423758423133 0.7389377653345548 0.8925848777089911 F F F  
0.1632130182862994 0.2725597931320678 0.3936785399513028 F F F  
0.0604353565258933 0.0596348327005600 0.0552322217087635 F F F  
0.1003309131464576 0.9438596062321665 0.5672761305112033 F F F  
0.2233513709064709 0.4472826273475476 0.4456012818806627 F F F  
0.2692303287151390 0.5643017075727599 0.9606175172589602 F F F  
0.2678722033951146 0.9432243126489794 0.9529383495623094 F F F  
0.1038951938491124 0.4413314502873789 0.4512007568991976 F F F  
0.0642209676997396 0.5594809818943602 0.9432646360153853 F F F  
0.2270763648375862 0.0596372265566103 0.4497705309017448 F F F  
0.2658586530912714 0.0630948858349996 0.0587483115104774 F F F  
0.1044168134020964 0.5609910482405454 0.5568161518502777 F F F  
0.0631773882601792 0.4387962105951004 0.0466077041241988 F F F  
0.2290880181636297 0.9392603295660891 0.5547845823868940 F F F  
0.2252101871468000 0.5673330951218247 0.5507173650646280 F F F  
0.0625663624445423 0.9400526038502335 0.9492681664176672 F F F  
0.2682674896955461 0.4438370896708861 0.0641215711807845 F F F  
0.1005366689662779 0.0643005805965657 0.4628177789643217 F F F  
0.3303210281759092 0.2769022006200075 0.1154828785522000 F F F  
0.5019560113109947 0.7621967010419368 0.6036952705265932 F F F  
0.6647755286653521 0.7712350853022087 0.8959962810314011 F F F  
0.4967620048885635 0.2992227487284015 0.4028694971567138 T T T  
0.3969649840190925 0.0621133736142738 0.0365675408920296 F F F  
0.4344509854380902 0.9427751837237182 0.5525610243890142 F F F  
0.5708124362586773 0.4520660424455869 0.4286179958163743 F F F  
0.5997470661707069 0.5620558131630560 0.9418096199113251 F F F  
0.6026499154937071 0.9306150538540834 0.9681288557510541 F F F  
0.4287894453530754 0.4417189719997268 0.4499761735177756 F F F  
0.3946299807013673 0.5588365531926129 0.9274765806919518 F F F  
0.6052771203991725 0.0038253634896108 0.3346186081498885 F F F  
0.6009606218537868 0.0490846425576024 0.0771431691691618 F F F  
0.4305784429232276 0.5624787918841534 0.5528572556005713 F F F  
0.3934219802284531 0.4370433467676804 0.0283664894137772 F F F  
0.5892102091159401 0.8989506854730180 0.4682445058888476 F F F  
0.5695322538357743 0.5680596731801373 0.5429956668665668 F F F  
0.3987593700880154 0.9424787783094075 0.9296456445558050 F F F  
0.5989349999196705 0.4397973103904818 0.0426979583248013 F F F  
0.4324922364913562 0.0630474252844593 0.4476942411398639 F F F  
0.6633226338147296 0.1862054787613587 0.1747211038533649 F F F  
0.8335458515326479 0.7684110424279140 0.6213264826785476 F F F  
0.0016689536612802 0.7356735443988640 0.8984315451833851 F F F  
0.8343772641867204 0.2246550814895656 0.3917787543367055 F F F  
0.7337945479699570 0.0654359283413442 0.0522371475274497 F F F  
0.7688063768502857 0.9534800286196869 0.6200320458511328 F F F  
0.8985672099140629 0.4417959160189469 0.4525753262457712 F F F  
0.9381669274397169 0.5579283983476415 0.9558165234888065 F F F  
0.9374833489413064 0.9375404656841937 0.9572185112043172 F F F  
0.7751107646144675 0.4389413280470578 0.4618523139022699 F F F  
0.7329042839746407 0.5644282780442254 0.9601161539131766 F F F  
0.8955051398732650 0.0575982280651175 0.4460739058736465 F F F  
0.9390866134783167 0.0592669402763022 0.0580752631293606 F F F  
0.7738221143769977 0.5563310079867350 0.5746441330383831 F F F  
0.7308424509714371 0.4438218618549996 0.0647375100433933 F F F  
0.8951812053856898 0.9378637032126917 0.5508754012754338 F F F  
0.8991104506902374 0.5619555295146625 0.5578679862447160 F F F  
0.7322458409670034 0.9439432004671033 0.9509157176062573 F F F  
0.9360946200063012 0.4376120610143417 0.0609724576944259 F F F  
0.7802343501511757 0.0643905577631472 0.4966324314889619 F F F  
0.5452288112713966 0.1433882976055170 0.5870032128460982 T T T  
0.6482196116024497 0.2042024046239774 0.3751394520801199 F F F  
0.5751284086662853 0.1956218076553989 0.4932708730551025 T T T  
0.5123090048673602 0.2561747553503360 0.5751803453717863 T T T  
0.4143506837438590 0.2535084670337109 0.2506633112362065 T T T  
0.5787604225457321 0.2602421820432465 0.2516746528291183 T T T

Structure TS14 monomeric Fe S=3/2

1.0000000000000000  
20.9172000884999996 0.0000000000000000 0.0000000000000000  
0.0000000000000000 17.8076000213999990 0.0000000000000000  
0.0000000000000000 0.0000000000000000 12.2158002853000003  
Al O C H Fe  
11 64 96 64 1  
Selective dynamics  
Direct  
0.4106079515769491 0.2546070592577362 0.2495137537228322 T T T  
0.0819984044851836 0.2513940497444906 0.2543648344249760 F F F  
0.2501888417377813 0.7540885923554157 0.7514796706682816 F F F  
0.2468360115398056 0.2511944388588816 0.2519502327286389 F F F  
0.0838150805166649 0.7525170167292856 0.7539324206703810 F F F  
0.5845905862088969 0.7496008639560117 0.7540296752857003 F F F  
0.4167748248664225 0.7528139625069770 0.7478308627709396 F F F  
0.7525714941446111 0.2486387621230861 0.2525994165569614 F F F  
0.9177538061295607 0.7496448194658285 0.7582154892853836 F F F  
0.9170990274863868 0.2517495346865459 0.2560676021484412 F F F  
0.7518221354825911 0.7471266383832145 0.7635148369509110 F F F  
0.6662965282549607 0.2415492558857650 0.1911363390602148 F F F  
0.8347765626595063 0.7480598077335756 0.6952837407175068 F F F  
0.0012108805640310 0.7506341390807947 0.8215557163682234 F F F  
0.8342760600481967 0.2501358074609712 0.3218280553652804 F F F  
0.7839557992117605 0.1769970471820628 0.1434487521520680 F F F  
0.9477306366853782 0.6706995301548488 0.6565279600774048 F F F  
0.8859719841341516 0.3295647654048679 0.1580806150932261 F F F  
0.7250893705055930 0.8228631805038660 0.6601532241144383 F F F  
0.7794618971976206 0.8287346016010630 0.8619243165380723 F F F  
0.9467539597997785 0.3321744312807056 0.3532389855774696 F F F  
0.8906635753844796 0.6693990285948601 0.8583526685747245 F F F  
0.7297725750412809 0.1627668460156784 0.3497098856129455 F F F  
0.8883059012467740 0.8285690458107595 0.8600819425634754 F F F  
0.7171169208131190 0.3249639436032368 0.3590026733084812 F F F  
0.7820297202131314 0.6709624873246298 0.8627589713656576 F F F  
0.9443603031417709 0.1727630386766634 0.3587185668529642 F F F  
0.8921019510312220 0.1709985149632303 0.1540089270561751 F F F  
0.7235713002044051 0.6667088757246233 0.6667358261966427 F F F  
0.7773905081419130 0.3333081846422488 0.1637880317275986 F F F  
0.9441878454939854 0.8301896341291055 0.6577195240090603 F F F  
0.3291808949221462 0.2514336191015047 0.1834039280600948 F F F  
0.5013030114747750 0.7518235211101043 0.6852207352281070 F F F  
0.6667466863290130 0.7493312727120340 0.8254533335749556 F F F  
0.4962833969099880 0.2658203963077516 0.3150182379530361 T T T  
0.4422632279464196 0.1714460455131643 0.1553735675694696 F F F  
0.6150729895500291 0.6702130472800576 0.6574910667729341 F F F  
0.5483267078474725 0.3288410649548794 0.1339188185281444 F F F  
0.3890815104358509 0.8330493843300317 0.6499518348557842 F F F  
0.4467603627405765 0.8312079218158885 0.8502394127343891 F F F  
0.6123207674480255 0.3540379790281278 0.3251370297131970 F F F  
0.551910989350071 0.6711722479427777 0.8501582600920159 F F F  
0.3865764267648046 0.1762154975588714 0.3514063049381164 F F F  
0.5555931205065789 0.8306797964636274 0.8538542737555090 F F F  
0.3828294250480724 0.3357486531332867 0.3437199437449294 F F F  
0.4432745006360079 0.6721856392781049 0.8455340582839099 F F F  
0.6782888281318762 0.0883690791462399 0.2269410526549862 F F F  
0.5508356200667137 0.1658900549446614 0.1619432893760191 F F F  
0.3858145956294834 0.6746293126897243 0.6458191270307978 F F F  
0.4392874430054192 0.3301987079512756 0.1420325684110111 F F F  
0.6161738929982619 0.8259862638872804 0.6506055675934945 F F F  
0.9996091696052574 0.2516077911815273 0.1893646388759151 F F F  
0.1668467367445956 0.7530279880207615 0.6870065720948020 F F F  
0.3336581671554200 0.7532607669387232 0.8149895515271552 F F F  
0.1648658678128427 0.2514718655587203 0.3191097480916341 F F F  
0.1091182067527896 0.1714471090063725 0.1546601380222867 F F F  
0.2770274624470872 0.6749234921564664 0.6491977214559057 F F F  
0.2199892983003906 0.3303253737642109 0.1500812435369099 F F F  
0.0527513128916723 0.8314384679932658 0.6563507984662067 F F F  
0.1127491177845386 0.8317268315805464 0.8521447329777700 F F F  
0.2744948052656611 0.3315518762691809 0.3530227542418984 F F F  
0.2221241812316848 0.6736428741539555 0.8545116072724781 F F F  
0.0530359088826202 0.1713737801982163 0.3565434938314525 F F F  
0.2213237319540724 0.8333955785664529 0.8503748011559580 F F F  
0.0552547292160881 0.3309878973960494 0.3537854569666834 F F F  
0.1133004198391134 0.6732484881709411 0.8549058910099561 F F F  
0.2781312499317394 0.1726745114060293 0.3503830692145797 F F F  
0.2175803632407423 0.1713654959881481 0.1549121864685077 F F F  
0.0564709146705269 0.6726021704551925 0.6529571731564729 F F F  
0.1113398124406473 0.3315978554824213 0.1519427566349876 F F F  
0.2803982504336915 0.8339382217031428 0.6521920822659766 F F F  
0.5599617169881311 0.1939603005365260 0.5767932291810089 T T T  
0.6015653044543507 0.2042738399824526 0.3742589307386287 T T T  
0.5012423502751149 0.3378375879759583 0.4820480190412589 T T T  
0.4789935413331227 0.3023664722851565 0.5751960619786959 T T T  
0.1634662191080878 0.1430607707304503 0.1293235536443476 F F F  
0.3312065587435882 0.6465673744263682 0.6222553824450472 F F F  
0.1655535755308506 0.3594007214994690 0.1261882727212793 F F F  
0.3345542427937644 0.8616794746675467 0.6258154248644985 F F F  
0.1668241490379714 0.8606158268875888 0.8768096515622332 F F F  
0.0010075558752121 0.3598977781562880 0.3789510215177643 F F F  
0.1678034958963153 0.6451227200616216 0.8795363585792373 F F F  
0.9987467947798763 0.1437020682294587 0.3826156172570236 F F F  
0.1640102920867434 0.0704057781834067 0.0639236478073499 F F F

0.3302416173032299 0.5736366125271957 0.5570943580886478 F F F  
0.1661994715932096 0.4328360481905804 0.0620934692287491 F F F  
0.9978964506350465 0.9321455800848497 0.5667717003643560 F F F  
0.1660118116162650 0.9330954694209765 0.9427968146629127 F F F  
0.3289443198993354 0.4353939430046907 0.4378187379411713 F F F  
0.1674609328455148 0.5716819489600340 0.9437894606323525 F F F  
0.9983717457770780 0.0704493828065580 0.4472236687377915 F F F  
0.1069730087217948 0.0344881251037279 0.0323669108203646 F F F  
0.2723468658144199 0.5389982665432953 0.5267094806148478 F F F  
0.2239226291386274 0.4695982591637531 0.0366646148301086 F F F  
0.0554583727105538 0.9690613701390376 0.5406144152868322 F F F  
0.1079453799924295 0.9673009707514026 0.9729911688833184 F F F  
0.2716949857795896 0.4714308660846243 0.4682309613864035 F F F  
0.2245578476789589 0.5374202329859727 0.9787609128549519 F F F  
0.0556974183695473 0.0366632235447284 0.4821763390426170 F F F  
0.2230617285090943 0.9688751074970625 0.9745871958057961 F F F  
0.0591219278274409 0.4676478969385585 0.4747161780494693 F F F  
0.1097292225876743 0.5349166407090209 0.9693084073967952 F F F  
0.2764096216390470 0.0370552258915282 0.4712741303900216 F F F  
0.2220699705672970 0.0360604890191496 0.0339350364717248 F F F  
0.0593788275477962 0.5350320710441494 0.5336455675186329 F F F  
0.1090746729306176 0.4670835861031861 0.0271899140899805 F F F  
0.2767818556935921 0.9694925820781961 0.5298112608363112 F F F  
0.4955241259473624 0.1405450989913888 0.1335418402549564 F F F  
0.6695644310120130 0.6410696353267937 0.6354831736226600 F F F  
0.4931357824858438 0.3574774703286963 0.1128657098600883 F F F  
0.6720864551151493 0.8505334415846306 0.6271861129620149 F F F  
0.5008443513949956 0.8587815705133082 0.8776440126669129 F F F  
0.3286066789251052 0.3622086880545083 0.3736558258495180 F F F  
0.4971626990934723 0.6429489390072973 0.8712837464416552 F F F  
0.3327322650651610 0.1459970734236649 0.3762531442779959 F F F  
0.4969125755949264 0.0676733251806994 0.0680696161870671 F F F  
0.6699965390500751 0.5703365058006042 0.5661955805820611 F F F  
0.493928055106649 0.4299023684230434 0.0477965708109522 F F F  
0.3344964960874179 0.9346859586218983 0.5605511703737065 F F F  
0.4997286488841226 0.9312483658460167 0.9446231070872955 F F F  
0.6694620181000488 0.4369382769438417 0.4378650653606329 F F F  
0.4958640688833356 0.5687827223580086 0.9325349422123210 F F F  
0.3337469368244186 0.072978855577375 0.4410221943446118 F F F  
0.4404490488666042 0.0364159754097741 0.0248463382604172 F F F  
0.6125052287896153 0.5399811286945280 0.5265074720130798 F F F  
0.5520960852659726 0.4653553510729012 0.0215571078237105 F F F  
0.3918404351030063 0.9704528343742780 0.5299705645336701 F F F  
0.4419228347556725 0.9694782003536346 0.9647214119893306 F F F  
0.6121886480167262 0.4746896337953643 0.4633373824795726 F F F  
0.5529797045961828 0.5335707896989490 0.9650877818271937 F F F  
0.3914861607858029 0.0380930871438920 0.4714586336373685 F F F  
0.5559840481226033 0.9627016889526914 0.9881090829982426 F F F  
0.3868434816241049 0.4698192328078292 0.4684158795473579 F F F  
0.4377878300457922 0.5327631295069395 0.9574943231296587 F F F  
0.6398511730355168 0.9920113452939034 0.3990332391755729 F F F  
0.5547934474447658 0.0292845301620304 0.0490571969458387 F F F  
0.3873761362111736 0.5374840010482842 0.5266896791166147 F F F  
0.4367663402303776 0.4646410884847896 0.0143110830078186 F F F  
0.6310016525478233 0.9335560379522576 0.4735208552699035 F F F  
0.8376018172661119 0.1453709563233332 0.1236937136697023 F F F  
0.0020017534623094 0.6434758850938422 0.6296479027143320 F F F  
0.8320371370503565 0.3595755234806077 0.1357232937806643 F F F  
0.9982257975056967 0.8591445430266305 0.6317866728694668 F F F  
0.8341700314639837 0.8573262047295742 0.8848849755322163 F F F  
0.6675735520049741 0.3658741694068652 0.3688485565582340 F F F  
0.8363606461849074 0.6420560348669113 0.8859054254659924 F F F  
0.7014007243623297 0.0995937240200107 0.3193323663672842 F F F  
0.8367745766735837 0.0717848258250271 0.0605244750053799 F F F  
0.0020002227305440 0.5704748136311508 0.5645360380258140 F F F  
0.8330203410560344 0.4322012659573033 0.0708577024348713 F F F  
0.6778067386084459 0.9176127509813483 0.5525812812755646 F F F  
0.8348623701513418 0.9316176624050172 0.9465315990769696 F F F  
0.0014631365795950 0.4326375792304233 0.4442565884840661 F F F  
0.8356193412939845 0.5695482592279149 0.9511378264968471 F F F  
0.6938021284880378 0.0389881876455433 0.4052113090706939 F F F  
0.7787233098245068 0.0379550430654234 0.0294410629983020 F F F  
0.9443276282007957 0.5354386261648401 0.5341172832392260 F F F  
0.8912877707767564 0.4653278270203884 0.0393791316783449 F F F  
0.7318637612487038 0.9644046861755768 0.5586588848074570 F F F  
0.7778879202115405 0.9692994787437357 0.9737060307668131 F F F  
0.9440562930512755 0.4680291306390743 0.4752395696195748 F F F  
0.892559029598347 0.5326591191202255 0.9805512411054451 F F F  
0.7388284955856363 0.0256100203023735 0.4880813244846038 F F F  
0.8929034208094535 0.9655964445404663 0.9775025673724613 F F F  
0.7271647010624775 0.4669687000835196 0.4776515008618745 F F F  
0.7773644657563992 0.5363433995819520 0.9825829469788019 F F F  
0.9408499161414809 0.0333808670231903 0.4730372123355266 F F F  
0.8938107517887204 0.0340816651122111 0.0335245679182279 F F F  
0.7273034189285568 0.5326026487336364 0.5407444028387971 F F F  
0.7760602469467273 0.4689785277892042 0.0412961433815724 F F F  
0.940560355858369 0.9658135577715896 0.5316266985910403 F F F  
0.9990305306247080 0.2285097473053668 0.1173101921379924 F F F  
0.1666915281100430 0.7307107113587250 0.6144179888025434 F F F  
0.3342962730666983 0.7378278254739499 0.8912162665634042 F F F  
0.1651054459967654 0.2724112513654191 0.3925385282757432 F F F  
0.0614165658496262 0.0598658722618879 0.0552671995763703 F F F

0.1004266613802116 0.9438855002319002 0.5671679454541021 F F F  
0.2262400509263074 0.4457908602707192 0.4453082311051304 F F F  
0.2699218107228347 0.5647574950499035 0.9598563242092126 F F F  
0.2685443740415820 0.9431694510179724 0.9519692887102451 F F F  
0.1041972352244329 0.4413527963910795 0.4512489483062723 F F F  
0.0648704481769968 0.5602464574887591 0.9425601212442487 F F F  
0.2311129408275860 0.0629251108243238 0.4479776701284877 F F F  
0.2667659635853283 0.0629144512181696 0.0582112414896017 F F F  
0.1046530184962862 0.5609887090262333 0.5567981609891390 F F F  
0.0637573146965735 0.4396220649871623 0.0461246099338939 F F F  
0.2317878583946964 0.9426985581600817 0.5526348522670901 F F F  
0.2274035003587329 0.5656942178367075 0.5499739482973922 F F F  
0.0632289968402731 0.9403957683467752 0.9489393864604665 F F F  
0.2687845935883573 0.4443534247048859 0.0635574825679726 F F F  
0.1008600378830735 0.0643100030724284 0.4627545106131734 F F F  
0.3279330215534060 0.2716742472257820 0.1096031180241894 F F F  
0.5026038148998708 0.7652657741645328 0.6082293397475382 F F F  
0.6653893451124731 0.7712713443329662 0.8982302755707892 F F F  
0.4995355708581419 0.2977102897111453 0.4048077391061372 T T T  
0.3950981978344359 0.0651560048998334 0.0389004679653198 F F F  
0.4371807432979935 0.9445519628384460 0.5529958687604974 F F F  
0.5670569390620486 0.4516253356773774 0.4342331076711403 F F F  
0.5983563382937334 0.5605981083344531 0.9454006449729135 F F F  
0.6014006486247325 0.9341801843340889 0.9738624377069769 F F F  
0.4316990168565908 0.4419752590067318 0.4477893132709454 F F F  
0.3931402796935757 0.5589153521344272 0.9314457148540072 F F F  
0.6050567680923820 0.0021334358382106 0.3341276967915903 F F F  
0.5990254336586105 0.0515280772839759 0.0835917684340899 F F F  
0.4327829259002485 0.5629958336546750 0.5501825634562678 F F F  
0.3912903685603695 0.4377534772737306 0.0336794932046871 F F F  
0.5884529032897419 0.8982205773661747 0.4689692936876071 F F F  
0.5677005537215223 0.5682824426736062 0.5461850323771813 F F F  
0.3976898554170987 0.9459737005297555 0.9319768685080732 F F F  
0.5967453709767128 0.4387858676748166 0.0465846600259283 F F F  
0.4365154848250796 0.0646730765942465 0.4482245668754814 F F F  
0.6637809824149485 0.1877850685913103 0.1695786815052074 F F F  
0.8333007780267465 0.7685396583804120 0.6216284633974070 F F F  
0.0020780541132339 0.7361516353199349 0.8981628425610495 F F F  
0.8338534691790329 0.2230079149646187 0.3908930968400028 F F F  
0.7340323313215720 0.0655939023689243 0.0514721927679815 F F F  
0.7682935681111402 0.9524782414664870 0.6201985000122363 F F F  
0.8988475863493761 0.4418334736586118 0.4522292128056620 F F F  
0.9381203605862041 0.5574405631761365 0.9563344980434394 F F F  
0.9375920224669940 0.9372745852012443 0.9570307329947170 F F F  
0.7719067926904160 0.4380919518241768 0.4591250597057766 F F F  
0.7328457237301222 0.5642265124822643 0.9599158226495845 F F F  
0.8958222458677412 0.0580358918621826 0.4458182286830095 F F F  
0.9392967295569932 0.0590994809442265 0.0576506627382543 F F F  
0.7722449502093554 0.5553177140103926 0.5717857527633257 F F F  
0.7305249833781815 0.4438588727304662 0.0649494130374819 F F F  
0.8952649360594833 0.9383115993289906 0.5505711997268321 F F F  
0.8993319963687654 0.5619934688277581 0.5574823682251946 F F F  
0.7323530029188490 0.9440016417026627 0.9504484666900055 F F F  
0.9357976847477616 0.4373564039421183 0.0619031533493128 F F F  
0.7801530502727019 0.0626614032836699 0.4956938097403594 F F F  
0.5478479118198084 0.1425288702149571 0.5935257192048824 T T T  
0.6490014268658164 0.1998650720463900 0.3734484654429168 T T T  
0.5753246765646300 0.1945408724728804 0.4986569621228880 T T T  
0.5086315740947921 0.2555340957152769 0.5816595598103350 T T T  
0.5753082456188193 0.2573685434952815 0.2560607102422475 T T T

Structure 16 S=5

1.0000000000000000  
20.9172000884999996 0.0000000000000000 0.0000000000000000  
0.0000000000000000 17.8076000213999990 0.0000000000000000  
0.0000000000000000 0.0000000000000000 12.2158002853000003

Al O C H Fe  
10 64 96 64 2

Direct

0.0803817752521369 0.2510204526403419 0.2543103010037976  
0.2494766084820750 0.7533217284785879 0.7543298168061578  
0.2433801424441015 0.2503183028456623 0.2530529491204725  
0.0834020201358731 0.7521168068861592 0.7544373153573118  
0.5849048330622737 0.74950077160690144 0.7499112522402929  
0.4165288003523412 0.7520462027581638 0.7461785146693577  
0.7544428453995693 0.2501889654857060 0.2532982135079463  
0.9176821080078634 0.7496317593102584 0.7581536139922268  
0.9172044020848523 0.2518551229154375 0.2558702634141034  
0.7520118257649469 0.7476327748275319 0.7631826803547587  
0.6667015444801334 0.2401862375231062 0.1906494938861041  
0.8349504457179651 0.7481855259231848 0.6952203068283954  
0.0009001119981213 0.7504002104923304 0.8217006395410004  
0.8354833653381772 0.2505320298699926 0.3217691183324135  
0.7841385344189894 0.1768221650967033 0.1448480355491200  
0.9475106485081632 0.6704907905759154 0.6565324841784276  
0.8865898925521797 0.3299824964540635 0.1574104113177112  
0.7260534176363881 0.8238110503880626 0.6597776366611525  
0.7796058081397054 0.8289347363526752 0.8619384322376107  
0.9462415890518489 0.3322810865159235 0.3532793272234153  
0.8906085205476212 0.6697257544661874 0.8583972018367886  
0.7307426198344077 0.1651845980725253 0.3514319998890229  
0.8884380795548148 0.8287916870549920 0.8599737472062531

0.7220905924082937 0.3265596285348678 0.3576113550187406  
0.7819768589202231 0.6712974979113211 0.8627109158198490  
0.9437195741619189 0.1724103387813664 0.3589659491951174  
0.8922705436651959 0.1711193042610150 0.1536332791886471  
0.7242155492033957 0.6677339224230924 0.6661914775951580  
0.7780784217104763 0.3327889474147728 0.1610111796750859  
0.9441152594319665 0.8298552442111986 0.6575814528023571  
0.3236409235037696 0.2504250060387666 0.1805292252323246  
0.5010296394237294 0.7511931742769556 0.6812859787250477  
0.6669684718189913 0.7493815258736866 0.8232234225720771  
0.4995615230895830 0.2679956270765759 0.3107670978390938  
0.4448320529631583 0.1649465553483680 0.1526509707370890  
0.6157667645070619 0.6706858093076499 0.6541342767662732  
0.5508452879347016 0.3286582709957963 0.1294934942954764  
0.3874423666811172 0.8316710560828975 0.6491119877287728  
0.4474208395101645 0.8292825432958333 0.8471092805557698  
0.6211009123009906 0.3600629795274505 0.3108053189229289  
0.5525817238644511 0.6714193411316545 0.8457340102467676  
0.3815755907152014 0.1723361747134653 0.3559701417430473  
0.5563086230307831 0.8288276336270575 0.8487597598571439  
0.3800392386643351 0.3384144206239958 0.3451579773463486  
0.4438505888377249 0.6717525562949175 0.8425811820955267  
0.6780224346018270 0.0915268456153029 0.2296743880774331  
0.5532636280002023 0.1652223008298699 0.1529498346712692  
0.3842770988828524 0.6742073758410205 0.6455865849515904  
0.4418143994991549 0.3295435720182113 0.1293029012504341  
0.6171939358191652 0.8261603830359646 0.6475428110382005  
0.9987359490669299 0.2514658637363258 0.1890226425029699  
0.1662430378749188 0.7524666181437430 0.6887843837997566  
0.3335567504875950 0.7525914260967601 0.8159419607728101  
0.1623739982316387 0.2511731683909527 0.3200074523267459  
0.106442308346108 0.1709825962480809 0.1541022671297441  
0.2754886342132665 0.6744825225620468 0.6522355476242905  
0.2175965298412521 0.3301700465848166 0.1513964015621275  
0.0526918237769387 0.8311679134303804 0.6565142701855781  
0.1120158792112133 0.8311714235016223 0.8528221903869349  
0.2717512119392045 0.3308617885021972 0.3543249948610384  
0.2213108588473734 0.6732855121033623 0.8567328931233251  
0.0522506813318979 0.1709707947891011 0.3566050239565935  
0.2206079799856728 0.8326291006021170 0.8528504763798833  
0.0545844242454277 0.3307141743560638 0.3541420786604213  
0.1124734514756661 0.6728097019310071 0.8556764609641331  
0.2733345399628775 0.1705611714895282 0.3509162567270253  
0.2146952266870107 0.1707483718782746 0.1556747674770210  
0.0562398152100210 0.6722644341836690 0.6532232173523830  
0.1091089962772409 0.3313051782211491 0.1517548322074348  
0.2787200685757822 0.8319484912661160 0.6545130334571404  
0.5729682629384577 0.2043857260200574 0.5764415685158595  
0.6041358503606660 0.2116520288732362 0.3743531810205976  
0.4839247558199183 0.3332111933258303 0.5076884132229228  
0.4958151930361117 0.3086335795660288 0.6089175332356106  
0.1608017022362871 0.1424455508893577 0.1292311489343266  
0.3293840011446379 0.6462725798172789 0.6238687751318361  
0.1633367168769393 0.3591958161035088 0.1265108091860648  
0.3325275405431092 0.8596784253449110 0.6263931021620589  
0.1659773699346761 0.8600256373895427 0.8781112057958097  
0.0004662361377021 0.3598920845102148 0.3792340181772634  
0.1668770143281846 0.6446716182085142 0.8807349939113984  
0.9980337321534365 0.1432545807176625 0.3828720217445336  
0.1617976094528598 0.0699706435005318 0.0638310312238818  
0.3275525871523955 0.5735863468975493 0.5589975226000760  
0.1643644908990486 0.4323822650602565 0.0622303499045950  
0.9977616665992413 0.9318079516445386 0.5668465233067004  
0.1647700119549461 0.932659255508940 0.9434288319463044  
0.3250292309749799 0.4360524654320483 0.4393806229243901  
0.1663001391377468 0.5710998097590186 0.9443297317953209  
0.9978341887091754 0.0700695741982339 0.4474644434361856  
0.1049840863229600 0.0337844061965768 0.0319027625697634  
0.2692955502541086 0.5398924572399523 0.5284746259759302  
0.2223017802669507 0.4687849912539502 0.0371505270781482  
0.0552338950359374 0.9688763468512465 0.5406567175768907  
0.1064333486294593 0.9665358626811370 0.9728070983363311  
0.2679964715426051 0.4724539420574789 0.4697612595249415  
0.2232700068499293 0.5366157409994825 0.9793615654482836  
0.0552731295281633 0.0364848902703858 0.4822703757781536  
0.2216015113806689 0.9688044048198334 0.9753648844779571  
0.0587765131116647 0.4675278318214698 0.4745717332784820  
0.1083870464989595 0.5345686440991625 0.9691905832231607  
0.2712344044806191 0.0331933049358058 0.4726246061036812  
0.2201462195371572 0.0360694930327568 0.0344161169000949  
0.0591137911557763 0.5349050039083052 0.5334750109025763  
0.1073979456894659 0.4667339019190165 0.0269334541638745  
0.2727717162196914 0.9657073398550621 0.5311100845731898  
0.4995530818598661 0.1366892474337270 0.1281987171357775  
0.6705726097952013 0.6417126708956205 0.6339819856928960  
0.4960144028121804 0.3573936756534393 0.1050848914256471  
0.6731629566731340 0.8512312136947559 0.6259621899010747  
0.5016986995619495 0.8566443365576161 0.8738603902309925  
0.3252229916637598 0.3630427782399899 0.3749754850548857  
0.4980552245676768 0.6430033948044449 0.8674382878659642  
0.3272372195093253 0.1427306620461712 0.3783118953505323  
0.4998700497480522 0.0636643584654255 0.0640363829999094

0.6720539991631349 0.5709149593684988 0.5656338073967558  
0.4970460641012044 0.4302640593745404 0.0417349326710044  
0.3311715767122759 0.9320612847986846 0.5607140268389920  
0.5013184652121805 0.9281279996174382 0.9411765872256284  
0.6744260259992851 0.4385761870808048 0.4361925929487979  
0.4974995073641414 0.5690570745304074 0.9282449250663815  
0.3281390762171752 0.0696362406716176 0.4418796568112283  
0.4429120458850128 0.0327183995572751 0.0228039996647817  
0.6152581962126531 0.5403806567934967 0.5233400324295717  
0.5549244841575416 0.4663916744420061 0.0162842093454213  
0.3880298523491494 0.9682419913258554 0.5291457865376269  
0.4436287437963906 0.9660582573657266 0.9625072221453789  
0.6165034961316563 0.4756844829788232 0.4591549428433873  
0.5550638721799276 0.5347401068102552 0.9603024044693448  
0.3865334243677397 0.0357426084960339 0.4708561806261449  
0.5581777822279759 0.9589894100530449 0.9831524494715632  
0.3832012261601864 0.4696976936513791 0.4701905087916653  
0.4396817231477208 0.5325119422240917 0.9528610986061631  
0.6411968592256478 0.9939781479140296 0.3996701862800079  
0.5576006340889542 0.0254870934694419 0.0439189881128206  
0.3844171951382403 0.5369778201634879 0.5289178112782611  
0.4394422363854925 0.4642142524806483 0.0088075199590848  
0.6324078884771515 0.9350348512965562 0.4732868937188759  
0.8377175943325180 0.1452708122231571 0.1241781128514649  
0.0017752883505059 0.6432290409281112 0.6297629533012579  
0.8327286520867782 0.3596989481035433 0.1341424830864186  
0.9981919693163473 0.8588315989457164 0.6318021086093194  
0.8343124519088585 0.8574726220749322 0.8849270049720288  
0.673201052674023 0.3698631929206082 0.3634519483382272  
0.8362776398564872 0.6424271281978826 0.8858996927217636  
0.7020606553669457 0.1021965447756710 0.3216959693679199  
0.8368188546145126 0.0716954908827239 0.0610760671075217  
0.0017554098856368 0.5702729421250901 0.5646330014483208  
0.8335054538718145 0.4324654174040562 0.0699717597697302  
0.6790940330893106 0.9188224871462900 0.5523622323242341  
0.8349934097141286 0.9316619389197318 0.9468224302993892  
0.0010575217625146 0.4325351976135124 0.4444666558042049  
0.8356559548977418 0.5699517462464769 0.9510589212176490  
0.6950316194833810 0.0410872340047052 0.4067174792238422  
0.7787814580802744 0.0378114211245529 0.0300817121189105  
0.9440364461321138 0.5352498803946250 0.5345167421887458  
0.8916860810040746 0.4657812265172835 0.0385716832069139  
0.7330532524485517 0.9657263329206609 0.5593703229072048  
0.7779916987336306 0.9692160697865287 0.9741847732140355  
0.9436850500435369 0.4678583093137472 0.4756652538097625  
0.8927250816084880 0.5332162560550053 0.9800668139108446  
0.7400320886451826 0.0273652204553305 0.4895591124989978  
0.8930195269755637 0.9656490287158017 0.9777916901625449  
0.7311669596726599 0.4682100211777137 0.4800210695032958  
0.7774883716062084 0.5366677070190367 0.9827195408138582  
0.9404054052262361 0.0328657235379259 0.4733577090222739  
0.8938846985092488 0.0340797815445038 0.0339338282351433  
0.7299610723528359 0.5337162064009717 0.5431781260124825  
0.7764035762166753 0.4691822492161682 0.0410949396415919  
0.9403154478452342 0.9652887652585286 0.53188224011147261  
0.9982208302610320 0.2272251786683467 0.117725544069550  
0.1666052181664557 0.7302830964081655 0.6161300265724879  
0.3351184869965776 0.7388986805961480 0.8928139751017852  
0.1621732735248690 0.2728688325918112 0.3929504380621194  
0.0592852516461475 0.0589843826480631 0.0543509504026178  
0.1002609659987240 0.9438192871641015 0.5671580953189238  
0.2223388995475523 0.4474079185464392 0.4465999783633715  
0.2687382190941099 0.5637896338593620 0.9606707634359506  
0.2672466251439221 0.9433381157835741 0.9531243191464872  
0.1037924754442196 0.4412208080845565 0.4508104587212868  
0.0637172065244484 0.5601489197758875 0.9420623990345174  
0.2256077940932184 0.0585311454853969 0.4499705283879634  
0.2646475852056854 0.0632921765335468 0.0588788382359713  
0.1044034906004059 0.5609186750422444 0.5563784906182471  
0.0619991809757010 0.4393606901496908 0.0455342031874939  
0.2283463436827080 0.9380496448286445 0.5549115718885457  
0.2246778113126389 0.5673029000639890 0.5517954669540129  
0.0619507300863853 0.9392749871203512 0.9483817648287356  
0.2670321407400069 0.4433201563630259 0.0642486056567359  
0.1003388926809661 0.0643197239320053 0.4627644334900885  
0.3219462489833149 0.2750033904184169 0.1093931431872265  
0.5017992496938075 0.7617437108983935 0.603347746234077  
0.6646560666832169 0.7710441123867606 0.8960893922574658  
0.4999691195348462 0.2863730749827457 0.3892779085144258  
0.3979443217633313 0.0618826721303265 0.0384267959655651  
0.4336863056160555 0.9428170611243992 0.5513877673249666  
0.5722258175270712 0.4528262929533251 0.4258886440199334  
0.6000313007443765 0.5626232606117304 0.9404794339347905  
0.6032733962589624 0.9301097375558637 0.9674845365229233  
0.4277441083708398 0.4414659408876825 0.4494411388574228  
0.3948509173932813 0.5583669374174079 0.9270835320557762  
0.6064862465627516 0.0044789116812058 0.3347899132617408  
0.6019008816056977 0.0483088011939518 0.0774328601200275  
0.4299769810095529 0.5618101840831683 0.5530221130875780  
0.3943717694569939 0.4363752781621160 0.0280471719198359  
0.5899802951293402 0.8995532286199457 0.4681636900733686  
0.5700368108663207 0.5683205666773791 0.5412468233267678

0.3992532486821425 0.9425568803997019 0.9304196473404968  
0.5997339689293908 0.4402316462477151 0.0413709370261479  
0.4309899694489963 0.0631467646240366 0.4466219774859976  
0.6651809312370847 0.1845542740874717 0.1762214884318840  
0.8335117755284378 0.7680851383375439 0.6212387566808906  
0.0016726746327694 0.7355693429537535 0.8981621812674208  
0.8350203414515553 0.2241947032698614 0.3914400561076239  
0.7340620770749013 0.0654057518395890 0.0520897434417674  
0.7693983082914578 0.9534869544732395 0.6209374054670839  
0.8984814124510700 0.4416018039983385 0.4528008826195632  
0.9381727662364294 0.5582154545335621 0.9557197294488408  
0.9377179656394562 0.9373790944223480 0.9572044205207924  
0.7762960721904105 0.4396339137152992 0.4633464240610640  
0.7328993201304896 0.5645586189167271 0.9604878911500108  
0.8953230034282690 0.0574166085309344 0.4462239684092025  
0.9393630204850582 0.0591198286517714 0.0580436890416751  
0.7741680857250486 0.5570414300592101 0.5762232585128114  
0.7309735573156356 0.4439524651943092 0.0650899357088990  
0.8951193877491638 0.9376086804755205 0.5509395787282332  
0.8990912090853428 0.5618164811685136 0.5580942545334876  
0.7324860457288510 0.9438608213299067 0.9509292307535576  
0.9362508850564935 0.4378534572013205 0.0608770646160690  
0.7813321524151241 0.0644022613848902 0.4978216438096743  
0.5633208770173611 0.1529284856052482 0.5971531721952620  
0.6513037006837981 0.2058519520591738 0.3759396678894856  
0.5829868098046456 0.2049553658508767 0.4945492876196639  
0.5267237113461094 0.2607054462459488 0.5987583997355804  
0.4105302775254100 0.2513244488956208 0.2462289073246310  
0.5819390420999269 0.2617765640276484 0.2484567048576115

Structure 16 monomeric Fe S=5/2

1.0000000000000000  
20.9172000884999996 0.0000000000000000 0.0000000000000000  
0.0000000000000000 17.8076000213999990 0.0000000000000000  
0.0000000000000000 0.0000000000000000 12.2158002853000003

Al O C H Fe

11 64 96 64 1

Direct

0.4104362612499616 0.2516764289710566 0.2453428260103290  
0.0818523655845516 0.2512996513960713 0.2543624222601496  
0.2498058898796429 0.7534801657136362 0.7519570065782568  
0.2463953693882991 0.2507028241538025 0.2509219229390991  
0.0835719108829668 0.7523436330923213 0.7542052339395244  
0.5845995328703922 0.7493886108749959 0.7519925268011469  
0.4165403962303256 0.7518140917288740 0.7461260240020664  
0.7537331648969611 0.2501856442520037 0.2536896114787771  
0.9176892793719685 0.7498681742293357 0.7583068285650151  
0.9175187446522024 0.2518955906892796 0.2559212873842714  
0.7518748595448055 0.7477789185104179 0.7635220867690579  
0.6644996080268890 0.2404609220828326 0.1914160281471964  
0.8348455865074590 0.7484896309187651 0.6954693893870703  
0.0009976900529730 0.7507053525878283 0.8217194503857533  
0.8352032404718657 0.2504279794702223 0.3218221997668362  
0.7836325135192794 0.1769091259045443 0.1452900017328032  
0.9474944316252666 0.6707441883198001 0.6565450258136720  
0.8864569289992285 0.3299444125503023 0.1577044849380827  
0.7255110963877900 0.8237103435300184 0.6598650439780737  
0.7794026949720850 0.8291912967813342 0.8619441488983474  
0.9468177870509039 0.3322272502741358 0.3531475971635397  
0.8906577888155824 0.6697807085820224 0.8584292738854968  
0.7292452190026244 0.1650694547372738 0.3509092809874604  
0.8882505351778909 0.8289489620738825 0.8602886494790575  
0.7208827766735070 0.3265080279878801 0.3571848768846191  
0.7820322900502474 0.6714786572091808 0.8630481564851158  
0.9443228693436319 0.1726132647877822 0.3585524336742405  
0.8918923432750677 0.1714467176961289 0.1536858737535233  
0.7240991212135334 0.6676917028420576 0.6669174800252984  
0.7778591491235564 0.3326006716425967 0.1610485838458570  
0.9441312448640966 0.8302312838527954 0.6578200800194792  
0.3284020088913327 0.2508371888615785 0.1814444208210220  
0.5011601820723635 0.7510107978084734 0.6828154957139934  
0.6666841328011192 0.7496244466425033 0.8243749750382233  
0.4941865745131891 0.2631922985026159 0.3109235589628951  
0.4410139189714046 0.1695918123051485 0.1522365587289997  
0.6156262378229737 0.6705306053987017 0.6558418672952637  
0.5483060729688866 0.3282805514806151 0.1337834798439782  
0.3881948604897487 0.8322223502005006 0.6486221301505906  
0.4466450243396916 0.8291708897020863 0.8480802371347010  
0.6188628031423694 0.3587360361005474 0.3144882509042546  
0.5521786825191298 0.6703787313613452 0.8479117347341695  
0.3851722850072890 0.1747225842286812 0.3494585055282026  
0.5554726797207840 0.8295012471531440 0.8510755644028524  
0.3827517585064983 0.3349570033262882 0.3413485881361877  
0.4435061844419422 0.6708917466995291 0.8432589512370428  
0.6768170779863278 0.0913528455496405 0.2287678059461358  
0.5494971570726981 0.1661552320976191 0.1526194464835652  
0.3850508822296382 0.6738681263782902 0.6446838664485648  
0.4392944682079997 0.3285348182178036 0.1377423912196544  
0.6166215545801258 0.8261686075491542 0.6486714118929235  
0.9995803049024452 0.2514909250757420 0.1892313366161614  
0.1665062092642972 0.7525857637161657 0.6874832589631074  
0.3334871054760809 0.7523441267493589 0.8143372766724010

0.1645535045286321 0.2513832032956968 0.3186636047153534  
0.1082585718837057 0.1711610833395759 0.1545974736876125  
0.2762819160681801 0.67338654841090802 0.6495925890009139  
0.2194359137487081 0.3300338096133291 0.1494035295586235  
0.052684856653076 0.8313469322191264 0.6564388878356092  
0.1124415059084159 0.8313814460917849 0.8523672820410697  
0.2744263532924100 0.3307927735018714 0.3517158705677312  
0.2215937101847215 0.6733635255504885 0.8550904731144598  
0.0529606091862336 0.1713660537558540 0.3568744244314080  
0.2210236656242521 0.8328820329123526 0.8511570851846827  
0.0552621987410177 0.3310251595961623 0.3538971415167012  
0.1127610462112030 0.6731031808224736 0.8553312356577031  
0.2767748613011913 0.1717533266005938 0.3489299796281299  
0.2166756735548570 0.1712887407812128 0.1538519607017140  
0.0562255356214706 0.6725055628621310 0.6532014287919715  
0.1108009210231255 0.3313692183083765 0.1518385581218033  
0.2795193310289872 0.8331708848288184 0.6524039756624159  
0.5687622938440351 0.1971669303900211 0.5784600681333102  
0.6016959130228505 0.2101221615908842 0.3735309670166876  
0.4873494658764165 0.3334140593105391 0.5081121864860615  
0.4990258606365312 0.3106633300199490 0.610439089498562  
0.1625694952117115 0.1428308285671420 0.1288414319940495  
0.3303596611496689 0.6456633082297707 0.6219241420589576  
0.1649884927399349 0.3591659777823457 0.1259102013486741  
0.3335748380153747 0.8609088963013780 0.6253404547233576  
0.1665043213195758 0.8601995248926708 0.8772837406571682  
0.0010441135482039 0.3599708553843907 0.3790153285029321  
0.1672340259049957 0.6449418328260175 0.8800399747748369  
0.9986884798371594 0.1435946881595913 0.3827230947342184  
0.1631194507335519 0.0701278429787343 0.0637258323997443  
0.3293912225713410 0.5727580510324733 0.5566342533503666  
0.1655438332659879 0.4326501211879999 0.0621108174661047  
0.9978565719785415 0.9320623953598759 0.5668026357343056  
0.1654952499463417 0.9327095029103619 0.9431199106367515  
0.3286742613477619 0.4347110679144937 0.4362715091551123  
0.1668177462007515 0.5715397653169614 0.9442400153549679  
0.9982783961730257 0.0703449247639235 0.4472971583025554  
0.1061554272276227 0.0340717571088844 0.0321518852194847  
0.2716576671090808 0.5375926462448927 0.5266119017238002  
0.2232726277572162 0.4694552822836774 0.0369551668376808  
0.0554033912629144 0.9690066014127890 0.5407020593939336  
0.1073139183397388 0.9668096917968656 0.9729860845735501  
0.2712971593094412 0.4701319744527839 0.4677447160232896  
0.2239190373914126 0.5373315090828781 0.9792486771897300  
0.0556135269201715 0.0366113054410284 0.4822866866372231  
0.2224491432054114 0.9686322078371211 0.9749909056672728  
0.0590181636028167 0.4677563891216898 0.4747789703972461  
0.1090665034270107 0.5347568496536144 0.9695462310196105  
0.2748708603945644 0.0362049384762960 0.4708746150796044  
0.2212771985914896 0.0359012179772707 0.0340800896501654  
0.0592064164935165 0.5351284242538729 0.5337206231577163  
0.1084025436053622 0.4668669513736845 0.0272549082058207  
0.2753692561849937 0.9687397881140555 0.5297116241504638  
0.4949469889105147 0.1392828698619567 0.1282097544119686  
0.6703863192530024 0.6416430028446964 0.6350329793894588  
0.4930073550483825 0.3564878539198713 0.1105095964409667  
0.6725360702575127 0.8510399088701358 0.6261894114515825  
0.5000666927566214 0.8571746581725367 0.8753355576944619  
0.3286493906096746 0.3614497345621669 0.3717944662643415  
0.4975058890136734 0.6419822440817989 0.8690065085767230  
0.3313213047410286 0.1448373522005442 0.3747161492314128  
0.4954345980451412 0.0657104618061546 0.0645683533564094  
0.6717247026882107 0.5709024294920019 0.5663608058155559  
0.4942936429610333 0.4288528376942374 0.0454963715717790  
0.3331656961022740 0.9339406433625529 0.5601220538427854  
0.4991657615075947 0.9291905301016633 0.9422267437326741  
0.6734391464514532 0.4383459890717612 0.4369345904795957  
0.4963526650893542 0.5677805544936657 0.9303138300184320  
0.3321630120170816 0.0720063566395239 0.4399938122441153  
0.4391594068950468 0.0335216128255134 0.0225765999266584  
0.6148285760437289 0.5407322982944546 0.5239060674293529  
0.5525022667683172 0.4644242060595786 0.0197369811039533  
0.3904204385680210 0.9696591112488531 0.5290450886627713  
0.4410317026980956 0.9665590482421880 0.9626736977099007  
0.6157457734373737 0.4759480990807633 0.4598777549018384  
0.5534364445791213 0.5326432065266873 0.9632028945716966  
0.3899370834357190 0.0371543963497689 0.4702328003526228  
0.5553449045275144 0.9612377872506220 0.9850561571527214  
0.3863186594225210 0.4698832766194550 0.4663603417419630  
0.4382635559605331 0.5316919417960810 0.9549186764171280  
0.6403259106884909 0.9932526110137146 0.3987943386784682  
0.5536012364719333 0.0279813855231117 0.0453542567436850  
0.3866260469483535 0.5372499333417602 0.5253141306971360  
0.4371824652671956 0.4635364307613497 0.0115850489337677  
0.6316685629378468 0.9343584200352986 0.4726148514430032  
0.8373216734595239 0.145558152602127 0.1244000488297891  
0.0017541147426424 0.6434574512576330 0.6297656147724709  
0.8325561307819138 0.3594944632411198 0.1341939407446969  
0.9981955773261907 0.8591014840732408 0.6318550854060282  
0.8341248798433881 0.8577048561739742 0.8850270089677885  
0.6716594043477979 0.3692466833574543 0.3646881446891280  
0.8363356235604884 0.6424789498862661 0.8859640994997483



0.7008388005263977 0.1019259104394017 0.3208210357012621  
0.8364815626357245 0.0720106503058381 0.0611220892780396  
0.0017902616720254 0.5704716261353504 0.5646374537526425  
0.8333969529745824 0.4322113412206367 0.0697238444975923  
0.6783750131490401 0.9183462821309620 0.5517918989470096  
0.8347529512257533 0.9319541701479153 0.9468068809683328  
0.0013951432565091 0.4326725207309025 0.4443416965282675  
0.8356968872393562 0.5698430978569294 0.9508701327784785  
0.6940382519122654 0.0405871922004651 0.4056656065424949  
0.7784765348987126 0.0381237075422635 0.0299291192730202  
0.9441498682854488 0.5353762660385538 0.5342155863673749  
0.8916043368629376 0.4655061545168255 0.0383239679412736  
0.7323061155409836 0.9653408097597715 0.5583380365836804  
0.777345847097300 0.9695373660526647 0.9739935152448216  
0.9439454336434844 0.4679756449695386 0.4753208498589028  
0.8927177917864996 0.5329816157022440 0.9798707176311762  
0.7391514856280651 0.0269218486016931 0.4883516138664561  
0.8927523320077624 0.9659675759635589 0.9778871485652882  
0.7303312519748083 0.4677229087013887 0.4806507737556749  
0.7775105319050098 0.5365244024473397 0.9823695244141204  
0.9407632480130195 0.0332276736268844 0.4730277632571410  
0.8935726375613429 0.0344086120138003 0.0340298986318488  
0.7294449235983756 0.5332710591965030 0.5438413859603615  
0.7763526718060387 0.4689943330668191 0.0406659452412253  
0.9405021699665085 0.9656633290112778 0.5316137438220122  
0.9991401439581519 0.2276279296539562 0.1177054424852924  
0.166833347802731 0.7304423390185856 0.6147914633831992  
0.3345320344038236 0.7389456353801908 0.8913557661347438  
0.1649861593415392 0.2724057199102689 0.3920311975749479  
0.0605342799346182 0.0593929853001893 0.0548319553445743  
0.1003711928226108 0.9438533468809363 0.5672953102935335  
0.2259018633726147 0.4441556948692916 0.4452705606076314  
0.2692625549130025 0.5647672525314776 0.9605176487053997  
0.2680016391477335 0.9430063688839843 0.9526306856518856  
0.1041085271961151 0.4415272120807581 0.4512477803465932  
0.0642275834036558 0.5601116783624677 0.9427504796901612  
0.2295093948517628 0.0620244106534237 0.4477860921101576  
0.2658783441180552 0.0629368807627402 0.0584229607281820  
0.1044489013967490 0.5611685401705060 0.5568443192612724  
0.0630998871813987 0.4393291311850861 0.0460645821679153  
0.2304103561374589 0.9420155953073895 0.5529438753871454  
0.2265841355696922 0.5637714274086983 0.5504326407832855  
0.0626733957794443 0.9397672093936706 0.9488458978278664  
0.2681007308966996 0.4441753820185763 0.0639348948787720  
0.1007536632918472 0.0643130230108074 0.4628977080377185  
0.3268143326700786 0.2719787333847852 0.1081956463275129  
0.5023261229843026 0.7627968389643063 0.6052523740099106  
0.6647561404442445 0.7718098409381877 0.8969524881291518  
0.4954394869272747 0.2813043201678798 0.3888931547300951  
0.3936760427028446 0.0618487788795283 0.0371386485611547  
0.4357904626403768 0.9437692029739589 0.5518871590820577  
0.5713352924062080 0.4533091946713597 0.4268362016733986  
0.5988265720412799 0.5597382400044304 0.9437631674028889  
0.6009468452523472 0.9331690392841677 0.9705249872388643  
0.4313421672778693 0.4429181934537990 0.4449273027081775  
0.3936666755506136 0.5578647684877046 0.9286640436007149  
0.6055408294821782 0.0035328697181767 0.3339380312332058  
0.5976059803155852 0.0513597849378159 0.0791665686572257  
0.4319462765696887 0.5630475865041196 0.5486005244032709  
0.3917003087342485 0.4365453361042682 0.0305763830121057  
0.5892752358059652 0.8988108715849092 0.4675388925243172  
0.5697387832265798 0.5689976662217614 0.5416848560943256  
0.3970259009044080 0.9423783043265037 0.9301431077873892  
0.5971614007843341 0.4380403969647222 0.0451596119416712  
0.4348974111656819 0.0636339442710342 0.4464228006959840  
0.6635215631464555 0.1850337935227350 0.1757492394919631  
0.8334148117272956 0.7684007662391444 0.6214918008538481  
0.0018284656136636 0.7359511457489302 0.8982167944187298  
0.8348764222007061 0.2245715072804944 0.3918800833581083  
0.7337217445620077 0.0656906505752522 0.0518071849540460  
0.7687530201495288 0.9532754364761779 0.6198001675781579  
0.8987612308684436 0.4417457317729755 0.4522623786197633  
0.9382134380474231 0.5579162022115116 0.9556195587433268  
0.9374711065914350 0.9377090086237960 0.9573940213684816  
0.7753530533331918 0.4388732435430366 0.4640887802673669  
0.7329461227667662 0.5644585779408020 0.9601046373829646  
0.8957248783215557 0.0578280887169995 0.4457511206849199  
0.9390470579465622 0.0594431575615482 0.0581787877199149  
0.7738015256056648 0.5561996812908939 0.5769106028847668  
0.7308793427510896 0.4438021220340046 0.0644930886277144  
0.8952319103160261 0.9380922114166589 0.5505310475244740  
0.8991335780613401 0.5618895306356919 0.5575608787120071  
0.7322375501231895 0.9442165494670560 0.9505908498757268  
0.9361657198724236 0.4375588003743723 0.0606116523588172  
0.7804282992547565 0.0640111141772583 0.4964230800824568  
0.5566963831481470 0.1457452161434095 0.5953815552484732  
0.6489869639140353 0.2049937928691331 0.3744446176287597  
0.5794352135909372 0.1992972470519636 0.4977972266576360  
0.5250964220741745 0.2598399035290960 0.6020697530756618  
0.5783599503359410 0.2601748629675058 0.2497642427005051

Structure TS15 S=5

1.0000000000000000  
20.9172000884999996 0.0000000000000000 0.0000000000000000  
0.0000000000000000 17.8076000213999990 0.0000000000000000  
0.0000000000000000 0.0000000000000000 12.2158002853000003  
Al O C H Fe  
10 64 96 64 2  
Selective dynamics  
Direct  
0.0803418466817334 0.2512588738694035 0.2546067065832176 F F F  
0.2495178016172090 0.7534293990266434 0.7542206616475582 F F F  
0.2435894099673490 0.2505269336072331 0.2529567449770340 F F F  
0.0833635654210454 0.7523607212403149 0.7545571339418657 F F F  
0.5849183454664413 0.7493892537408087 0.7497790887926499 F F F  
0.4166145613403103 0.7519966624984349 0.7462126087320300 F F F  
0.7540740532073826 0.2499780090022128 0.2539742848452633 F F F  
0.9176134960872204 0.7498127772702219 0.7584379495018823 F F F  
0.9169655692353160 0.2519598476974494 0.2560260765031401 F F F  
0.7519677695188278 0.7476200091444625 0.7630236026295023 F F F  
0.6661089438156722 0.2393571924211741 0.1925244932846724 F F F  
0.8349259571837493 0.7483709407195178 0.6952947160997809 F F F  
0.0008594990894721 0.7506699969122792 0.8219213867023285 F F F  
0.8352476560285496 0.2505107876503132 0.3221483242310512 F F F  
0.7838693110609043 0.1771261570859366 0.1446911639278028 F F F  
0.9474465448353513 0.6708034206692588 0.6566817064560695 F F F  
0.8861536201884661 0.3299146358474871 0.1576414178143395 F F F  
0.7258187466367190 0.8235629927584398 0.6592620988879716 F F F  
0.7794006393354707 0.8291433291317887 0.8616361395349372 F F F  
0.9460786596929438 0.3324715770674089 0.3533942897119857 F F F  
0.8906280094288022 0.6697030533847226 0.8585014628730789 F F F  
0.7311565709349992 0.1640818386038916 0.3510366827770568 F F F  
0.8882358770242007 0.8288615053186064 0.8602917328603041 F F F  
0.7215952460989925 0.3261706827110302 0.3581113545626309 F F F  
0.7820078065128868 0.6713490922873220 0.8627077520396753 F F F  
0.9436099964046250 0.1725605823047900 0.3590541535444984 F F F  
0.8919911184843627 0.1711951315569422 0.1538315856143910 F F F  
0.7243108361851256 0.6675618844093805 0.6661488050422548 F F F  
0.7776229296398967 0.3327419768183333 0.1614408094899602 F F F  
0.9440581144281452 0.8301333173406675 0.6579181954121367 F F F  
0.3238185412213568 0.2509856058572666 0.1801759189504324 F F F  
0.5010326374277270 0.7510956962303510 0.6812094912283442 F F F  
0.6669780306939046 0.7494108148882148 0.8230505711551714 F F F  
0.5005788167649996 0.2668412077819085 0.3123691949228302 F F F  
0.4450966899093700 0.1649860051680818 0.1521780807539130 F F F  
0.6158598122052581 0.6705991325712901 0.6541393406033578 F F F  
0.5512443683157287 0.3286271961849465 0.1300880596171297 F F F  
0.3875679702478863 0.8318819907383457 0.6493457031384366 F F F  
0.4474326983952039 0.8292089546948631 0.8471353107341955 F F F  
0.6195219690802389 0.3579070044491743 0.3152068385790585 F F F  
0.5526940826549236 0.6715267415310180 0.8458350236546508 F F F  
0.3821174285368087 0.1722405599232459 0.3552306775725285 F F F  
0.5563315944429377 0.8288310497227727 0.8485265535749491 F F F  
0.3806490008723955 0.3381976418666852 0.3455628252804885 F F F  
0.4439720388997017 0.6717377077902569 0.8427258792931269 F F F  
0.6783113889164483 0.0909767573368683 0.2285629602544077 F F F  
0.5534598780503472 0.1642063003942837 0.1548995710927770 F F F  
0.3844413976841210 0.6744171276495763 0.6453729807611595 F F F  
0.4422655210550772 0.3297391683107733 0.1304045666863658 F F F  
0.6169462959620091 0.8258889872913429 0.6471914655217859 F F F  
0.9986139989908854 0.2516270825372047 0.1892833221803798 F F F  
0.1662572195839047 0.7526495592007194 0.6887888654609284 F F F  
0.3335808773311513 0.7525227448009559 0.8158451976164187 F F F  
0.1625367195504737 0.2514539827179050 0.3201277481116449 F F F  
0.1064521740660709 0.1711484059175064 0.1544986430840041 F F F  
0.2756463370330735 0.6745602040390253 0.6518745372748924 F F F  
0.2175883124339748 0.3304539024023185 0.1514914377637311 F F F  
0.0526035699484311 0.8313648630890427 0.6566220926625661 F F F  
0.1120696734111277 0.8313999130200997 0.8528774736035132 F F F  
0.2722957499032574 0.3310876329084422 0.3540818490397584 F F F  
0.2212804481314805 0.6734147462004216 0.8566348497470599 F F F  
0.0521584757029601 0.1712643015197983 0.3569267056352672 F F F  
0.2206643981401371 0.8328037029921518 0.8528691515464004 F F F  
0.0544407616891007 0.3309677036884082 0.3543104417575833 F F F  
0.1124407211559273 0.6731297841275463 0.8558640232263599 F F F  
0.2738296867362351 0.1707875617468559 0.3506254688054540 F F F  
0.2147166738960138 0.1709899417072336 0.1557509194403366 F F F  
0.0561738662755218 0.6724661553319677 0.6534278313132091 F F F  
0.1090889214491426 0.3315121969606238 0.1520062462620047 F F F  
0.2788466893534078 0.8322156967992953 0.6545980376603922 F F F  
0.5693263696024192 0.2010362692042628 0.5687270354664461 T T T  
0.6048156562777095 0.2082889282869219 0.3785506826596540 T T T  
0.4886786663118889 0.3360472717374526 0.5034383244059908 T T T  
0.5012828086233697 0.3088781194348857 0.6016833302212827 T T T  
0.1608076705754655 0.1426425537524878 0.1294998924506174 F F F  
0.3295772976675053 0.6464838626880507 0.6234311537197499 F F F  
0.1632976563995641 0.3594578526378243 0.1267352495835397 F F F  
0.3326803464950672 0.8599887029679323 0.6267224512441700 F F F  
0.1660526746546012 0.8602087478956193 0.8782012820759917 F F F  
0.0002871914987850 0.3601169030748252 0.3793534621307515 F F F  
0.1668268600171459 0.6449327150121391 0.880868945404596 F F F  
0.9979391728398141 0.1434587840331858 0.3830013333103821 F F F  
0.1617863575069407 0.0701314911234832 0.0641342856780369 F F F  
0.3279383266391562 0.5739024920852600 0.5582216967380660 F F F

0.1642689169557698 0.4326993872941145 0.0625574760100491 F F F  
0.9976525093556390 0.9319648581313871 0.5668769558578077 F F F  
0.1648309612195007 0.9328137643821179 0.9436468668219575 F F F  
0.3256668066424666 0.4362891574860086 0.4387822018506569 F F F  
0.1662052346431722 0.5714314749455767 0.9446486804348169 F F F  
0.9977301628125588 0.0702162335272831 0.4474586085708339 F F F  
0.1049936042705895 0.0338950417801769 0.0321996048608497 F F F  
0.2697508007123872 0.5397276433173772 0.5285105938842136 F F F  
0.2221950643960753 0.4691442486200472 0.0375457316372945 F F F  
0.0551240546898200 0.9690222060246541 0.5406559148478252 F F F  
0.1064833936497038 0.9666568898684389 0.9730683058132428 F F F  
0.2685800371078457 0.4722637974416841 0.4698684648595020 F F F  
0.2231673096212887 0.5369758936716522 0.9797686587867105 F F F  
0.0551662910085398 0.0366276105487273 0.4822613720474749 F F F  
0.2216401621356070 0.9689857260606871 0.9756522145465496 F F F  
0.0585821468227721 0.4677160072214406 0.4748190957294867 F F F  
0.1082898654605984 0.5349055016344622 0.9695337284823466 F F F  
0.2716509238785321 0.0337461237235104 0.4730654359830595 F F F  
0.2201458610906428 0.0362487082232548 0.0347237760311856 F F F  
0.0589473831701781 0.5350868877319925 0.5337345546927210 F F F  
0.1072983310564055 0.4670612628270234 0.0272730428904495 F F F  
0.2730888649358434 0.9663173741205142 0.5317171662243112 F F F  
0.4997053748781042 0.1362139943468534 0.1287238363139238 F F F  
0.6706480534609724 0.6415771461899951 0.6339561833781104 F F F  
0.4966571471550765 0.3574805007851083 0.1058807021368580 F F F  
0.6729049736505459 0.8508891921625974 0.6253854009262554 F F F  
0.5017192136987632 0.8565892918019600 0.8737299519275510 F F F  
0.3258299180152946 0.3631122149952049 0.3748203743545844 F F F  
0.4981976815740765 0.6431014114022702 0.8677778056998449 F F F  
0.3277529197301590 0.1429279034672959 0.3779778266739342 F F F  
0.5000416650225219 0.0633988018763105 0.0642134227023945 F F F  
0.6719960732521741 0.5707534734332569 0.5656798804662344 F F F  
0.4974529457713714 0.4304525675678690 0.0425416410387953 F F F  
0.3314210758141556 0.9325292990085003 0.5613272936035756 F F F  
0.5013612230799538 0.9280532167079940 0.9410452019262081 F F F  
0.6738475700617030 0.4380179598861673 0.4370317319404577 F F F  
0.4977595840878664 0.5693081575457981 0.9289677105797409 F F F  
0.3285857700199060 0.0700067504997435 0.4420780838009648 F F F  
0.4430460290565392 0.0326166907559156 0.0228337915604371 F F F  
0.6150944847899424 0.5404254720542667 0.5234972237753794 F F F  
0.5552739493680221 0.4666758197828642 0.0169709651536607 F F F  
0.3883338648996641 0.9686264479210678 0.5297789826613197 F F F  
0.4437006764468094 0.9660174156385963 0.9624096278437477 F F F  
0.6160792095545986 0.4755218204830669 0.4597670098299389 F F F  
0.5553592678477202 0.5350413075561136 0.9610181043331920 F F F  
0.3869243532535265 0.0360390114309155 0.4712481020113870 F F F  
0.5582624814375663 0.9587979619277149 0.9830237903390469 F F F  
0.3837966792855738 0.4705028330887657 0.4685057680769660 F F F  
0.4399943015649654 0.5327238426010297 0.9537708250720272 F F F  
0.6409367020883749 0.9932651155584367 0.3985555618655496 F F F  
0.5577446690149941 0.0252080492391471 0.0439911536263295 F F F  
0.3848907563817008 0.5378441309640820 0.5271206695838799 F F F  
0.4398275764120783 0.4644110750290480 0.0097260790864624 F F F  
0.6320881750858902 0.9344326691922333 0.4723596028800969 F F F  
0.8374236826390913 0.1454962672127564 0.1241289435741493 F F F  
0.0016875621878754 0.6434876878589293 0.6299306486621532 F F F  
0.8322600282266919 0.3595758158440034 0.1343343807173909 F F F  
0.9980951204881237 0.8590423616349554 0.6319700250267886 F F F  
0.8340854636251720 0.8576403553408127 0.8848894260314921 F F F  
0.6722900226103334 0.3687850618418480 0.3652469315708231 F F F  
0.8362789230602630 0.6423876090725997 0.8858852751182980 F F F  
0.7022311535609589 0.1013805109135362 0.3207558823116656 F F F  
0.8365060435333689 0.0719602196520910 0.0608803478702882 F F F  
0.0016094450401667 0.5705391412253178 0.5647787079285891 F F F  
0.8331335179071786 0.4322589065105973 0.0698478062425778 F F F  
0.6787728841361229 0.9183042248470557 0.5515044455604610 F F F  
0.8347195665168243 0.9318847621748745 0.9466660368525055 F F F  
0.0008564081475200 0.4327914309514469 0.4445740667642113 F F F  
0.8355712891509199 0.5698082454765512 0.9508871419872023 F F F  
0.6948330771259563 0.0402692108944791 0.4055700254366243 F F F  
0.7784839390036851 0.0381127371140337 0.0296978675696735 F F F  
0.9438746448013262 0.5356033964449480 0.5345156298562372 F F F  
0.8913757302717400 0.4654738370693892 0.0384876728299943 F F F  
0.7327396163199111 0.9651658431895598 0.5584818946766035 F F F  
0.7777143365989758 0.9694999565345199 0.9738336375948364 F F F  
0.9434948485984407 0.4682095512491884 0.4756461662102751 F F F  
0.8925607238919895 0.5329220329317153 0.9799911193036195 F F F  
0.7397726078360520 0.0266681632761632 0.4885030911389237 F F F  
0.8927313040582590 0.9658682366807767 0.9777428302165987 F F F  
0.7307172772639063 0.4675795609364002 0.4804666111094136 F F F  
0.7773476799533370 0.5365670306027255 0.9823613875084547 F F F  
0.9403028829059465 0.0329762782501177 0.4732637670330746 F F F  
0.8935728956787727 0.0343126208544078 0.0338550529554880 F F F  
0.7297714184988422 0.5332497352369003 0.5432958607605372 F F F  
0.7761181284552521 0.4690719907900132 0.0407343832344864 F F F  
0.9402100486301634 0.9654111959461105 0.5318182431594636 F F F  
0.9981319210182988 0.2274165082926132 0.1180111329795395 F F F  
0.1665379730492020 0.7307007011720401 0.6159819200007490 F F F  
0.3351037497300453 0.7385739109171681 0.8926247268532279 F F F  
0.1624125316277727 0.2731709434440077 0.3930608869281187 F F F  
0.0592689311685390 0.0590407910427331 0.0546428613231384 F F F  
0.1001485477450572 0.9439637417189388 0.5671584525068454 F F F

0.2229875524648151 0.4467925189228268 0.4473564887288930 F F F  
0.2686349051137640 0.5641679916776070 0.9611376389965045 F F F  
0.2673056609540154 0.9435557168128952 0.9534533154125953 F F F  
0.1035925548618124 0.4413573385005236 0.4511519690266255 F F F  
0.0636129658359295 0.5604810432779814 0.9424192124687636 F F F  
0.2260689783359879 0.0591730817802656 0.4503612820287231 F F F  
0.2646287393643618 0.0635046820992642 0.0591992442236347 F F F  
0.1042461559541223 0.5610376064688865 0.5567448283838559 F F F  
0.0618936372512877 0.4396933726419334 0.0458497738702164 F F F  
0.2286104945224849 0.9388009858181903 0.5555811917492974 F F F  
0.2250813587832567 0.5667470667830585 0.5524783835970979 F F F  
0.0620090731293814 0.9393757031504038 0.9486315135977605 F F F  
0.2669282946198024 0.4437052654509301 0.0646764016107753 F F F  
0.1002295813302538 0.0644625515144028 0.4627520061158350 F F F  
0.3220927521252079 0.2769171136668120 0.1100447415677479 F F F  
0.5017978491192494 0.7626073448146258 0.6035588052478005 F F F  
0.6646796906974970 0.7710636706321239 0.8959232091209870 F F F  
0.5007985112944695 0.2886129493908811 0.3897290918280518 F F F  
0.3981172327742044 0.0618482713984037 0.0385095105642321 F F F  
0.4339521031398590 0.9431421666593280 0.5521175495153017 F F F  
0.5717017810314147 0.4527419452798895 0.4267985364833180 F F F  
0.6003131521748060 0.5629613635308601 0.9411747976272196 F F F  
0.6033123780157084 0.9298747562575329 0.9672155789660266 F F F  
0.4284416117356784 0.4427925410824969 0.4467862114355725 F F F  
0.3951391652575182 0.5585621651758146 0.9280922607907769 F F F  
0.6062288249968191 0.0037425311364601 0.3336433998913293 F F F  
0.6020664600349548 0.0479245095279026 0.0775666498504748 F F F  
0.4304226808350791 0.5631544675592366 0.5503181544331923 F F F  
0.3947648767848904 0.4365642293899725 0.0289556403723950 F F F  
0.5896337049574711 0.8989803504407945 0.4673447932421624 F F F  
0.5699881091684347 0.5686635406048381 0.5412630454220206 F F F  
0.3993036939274646 0.9425852245007960 0.9302801088315746 F F F  
0.6001180892050826 0.4405112251141716 0.0419078302374061 F F F  
0.4314228850506936 0.0632478644925811 0.4467328374921635 F F F  
0.6649041788382561 0.1838314643022514 0.1769304947565900 F F F  
0.8335649900582425 0.7683954473703665 0.6213802476698191 F F F  
0.0016677314739582 0.7358446869379591 0.8983866503253068 F F F  
0.8349087411404170 0.2238328201460078 0.3915510110684437 F F F  
0.7337540308638779 0.0657235256907640 0.0515848825914276 F F F  
0.7690293181688972 0.9529944826584114 0.6201617282725920 F F F  
0.8982688365457037 0.4420468102653885 0.4526794365558402 F F F  
0.9380809970871837 0.5578115489979893 0.9557827624031816 F F F  
0.9374387324254840 0.9375836037640752 0.9572745785141805 F F F  
0.7757291367810311 0.4387334180955307 0.4638630650772910 F F F  
0.7328109032910390 0.5645302251675801 0.9600220724820332 F F F  
0.8952216756451676 0.0574947444394098 0.4460514575712153 F F F  
0.9390364258121693 0.0593481262206055 0.0580492873757592 F F F  
0.7740782570415732 0.5564062193624579 0.5761948161962422 F F F  
0.7306241183374169 0.4439331124502388 0.0645698049572658 F F F  
0.8950106901339936 0.9377205708347987 0.5508321591525061 F F F  
0.8989362437753812 0.5622354411113477 0.5579869086882070 F F F  
0.7322117983850518 0.9441739594501826 0.9504709472875064 F F F  
0.9358951984173984 0.4374676838298726 0.0608607235540504 F F F  
0.7810377064274618 0.0637599754227978 0.4966145194927876 F F F  
0.5513718810636257 0.1519735698361090 0.5855153548692843 T T T  
0.6519559512930714 0.2031726962791607 0.3808830485688210 T T T  
0.5829974757425107 0.2031882932664305 0.4824818199851301 T T T  
0.5331133611889893 0.2524642009975154 0.5881755825128392 T T T  
0.4109185167958174 0.2516657805575306 0.2455258213788056 F F F  
0.5816769300680229 0.2597187828100720 0.2501402780571939 T T T

Structure TS15 monomeric Fe S=5/2

1.0000000000000000  
20.9172000884999996 0.0000000000000000 0.0000000000000000  
0.0000000000000000 17.8076000213999990 0.0000000000000000  
0.0000000000000000 0.0000000000000000 12.2158002853000003

Al O C H Fe

11 64 96 64 1

Selective dynamics

Direct

0.4106054741706302 0.2520110127481132 0.2454749184230351 F F F  
0.0818234112517970 0.2513249644732412 0.2543752129020334 F F F  
0.2497900258449590 0.7535713871369012 0.7519928141059609 F F F  
0.2464445311974828 0.2507695306336259 0.2508643967968638 F F F  
0.0835541970221385 0.7523614692513689 0.7542147242897101 F F F  
0.5845856399263241 0.7493464419756037 0.7520908112640612 F F F  
0.4165515060136116 0.7519784582534825 0.7462039841625909 F F F  
0.7534416253909200 0.2500909941720337 0.2545527905643894 F F F  
0.9176719684635657 0.7498246432751827 0.7583431678354486 F F F  
0.9173853696035508 0.2519128275360387 0.2559693424397480 F F F  
0.7518709767010066 0.7476654460466605 0.7635804894712095 F F F  
0.6635307193210522 0.2397180241301413 0.1937738167850469 F F F  
0.8348501916085951 0.7484152053389082 0.6955036212346428 F F F  
0.0009831350265443 0.7506892493830222 0.8217377850537702 F F F  
0.8351517208542631 0.2504514778061235 0.3221487473679048 F F F  
0.7834279414947218 0.1769844123794542 0.1454370530707010 F F F  
0.9475120914366002 0.6707398973895877 0.6565544270432255 F F F  
0.8861773242241640 0.3298475447643554 0.1578823708636108 F F F  
0.7254713816489371 0.8234911455342839 0.6598834008611334 F F F  
0.7793977434572383 0.8291802929969947 0.8619061635686336 F F F  
0.9468216297616152 0.3322722803147826 0.3531144430593756 F F F  
0.8906539407797212 0.6696592460453274 0.8584744133316704 F F F

0.7299418154734028 0.1645062741005034 0.3513304894806737 F F F  
0.8882421570342345 0.8289442859767817 0.8603082307255221 F F F  
0.7207033927738351 0.3264741745632662 0.3574417284591291 F F F  
0.7820341341477999 0.6714047801989977 0.8631033696027188 F F F  
0.9443254526480800 0.1726336993839510 0.3586138030286392 F F F  
0.8917101692537486 0.1714631629043382 0.1538642955272067 F F F  
0.7240873666556595 0.6676134906703268 0.6670107637178191 F F F  
0.777553551376080 0.3324136484953684 0.1612857117930275 F F F  
0.9441207111274039 0.8302217233417792 0.6578174726918959 F F F  
0.3284927463106868 0.2509395414782318 0.1815708410638095 F F F  
0.5011367080557108 0.7511006403558653 0.6828823495066345 F F F  
0.6666681988100649 0.7495642559500411 0.8244674625133470 F F F  
0.4949451339927222 0.2633365309652262 0.3128360397301648 F F F  
0.4412809043313999 0.1698196443753091 0.1528515240271560 F F F  
0.6156122414001075 0.6705471099938549 0.6558996108394126 F F F  
0.5481300502104105 0.3282773173738960 0.1341166984618241 F F F  
0.3881881465305383 0.8323763980752972 0.6486489203095189 F F F  
0.4466764366329485 0.8294661696019148 0.8480321631199885 F F F  
0.6179084636796404 0.3574568783139682 0.3177673732347230 F F F  
0.5520708343512482 0.6703944020742654 0.8479526016873606 F F F  
0.3853692302345948 0.1749376442005826 0.3496260681475292 F F F  
0.5555044439103582 0.8296129952650588 0.8511568510533110 F F F  
0.3828980416493835 0.3350067782626596 0.3416223282076842 F F F  
0.4434097026107580 0.6711029054798061 0.8433847707046382 F F F  
0.6772312735916515 0.0911341590915029 0.2290080939803616 F F F  
0.5496469835244184 0.1650480576097308 0.1555927146189902 F F F  
0.3850499749784788 0.6740187355838998 0.6446751390480117 F F F  
0.4391659647263495 0.3287377746823026 0.1388367501738017 F F F  
0.6165745426724456 0.8260831713148065 0.6487790474732833 F F F  
0.9995127915295043 0.2515055822352608 0.1892604132460534 F F F  
0.1665056491640513 0.7526477614067417 0.6874993081853518 F F F  
0.3334799919775548 0.7525225227242842 0.8143509354969609 F F F  
0.1646035017324508 0.2514200873063430 0.3186442868912636 F F F  
0.1082747240544677 0.1712145671753689 0.1546009748388073 F F F  
0.2762791391379267 0.6739433361246299 0.6496360528385736 F F F  
0.2194713531342245 0.3300876686402319 0.1494255939507383 F F F  
0.0526744333010427 0.8313572779279426 0.6564631771285789 F F F  
0.1124178548046686 0.8314056988436391 0.8524090154130732 F F F  
0.2745511607720701 0.3309019300782694 0.3517464894952482 F F F  
0.2216152961790030 0.6734329581496965 0.8551270526998636 F F F  
0.0529685332342140 0.1713821214474365 0.3568648606148344 F F F  
0.2209992502296316 0.8329570836727385 0.8511371458373418 F F F  
0.0552714675468806 0.3310310203114781 0.3538871224638029 F F F  
0.1127830951089237 0.6731368060195351 0.8553390622095947 F F F  
0.2769504053363789 0.1718739385448416 0.3488612253234606 F F F  
0.2166990221386840 0.1713119245817651 0.1538919643002075 F F F  
0.0562428502976147 0.6725167640449783 0.6532176734858126 F F F  
0.1108306813500022 0.3313973967105710 0.1518442761453542 F F F  
0.2795093856867510 0.8333001924819996 0.6523723522088858 F F F  
0.5696451315240653 0.2013919795045883 0.5703724178685201 T T T  
0.6022818318301615 0.2077830175014583 0.3785461457709122 T T T  
0.4842636829969944 0.3320953233291642 0.5077410469830943 T T T  
0.4992504197380127 0.3066158638884814 0.6057828788723403 T T T  
0.1625843590985312 0.1428717316021064 0.1288704107149741 F F F  
0.3303705925013247 0.6457846336043431 0.6219586520197993 F F F  
0.1650109672186204 0.3592068539093489 0.1259264185095716 F F F  
0.3335649079216836 0.8610350913258600 0.6253349812003108 F F F  
0.1664740405444931 0.8602448151712494 0.8773005592799379 F F F  
0.0010471551138806 0.3599896084773420 0.3789903641642454 F F F  
0.1672569932913461 0.6449913737247428 0.8800647102364607 F F F  
0.9986921496974190 0.1436163710969112 0.3827389655320204 F F F  
0.1631208298708771 0.0701628000570480 0.0637603894803291 F F F  
0.3294265931207221 0.5728729499424858 0.5566650481989868 F F F  
0.1655655931147351 0.4326934530250739 0.0621316450155689 F F F  
0.9978507748519618 0.9320663300996870 0.5668088213675020 F F F  
0.1654717211330308 0.9327471050763734 0.9431484332694922 F F F  
0.3287765536033547 0.4348270165623802 0.4362753549694176 F F F  
0.1668439889713582 0.5715872520445799 0.9442637056838805 F F F  
0.9982932884337288 0.0703584515982527 0.4473068428956068 F F F  
0.1061500746419526 0.0341143970553119 0.0321993109110821 F F F  
0.2717161939628525 0.5375479457368684 0.5269275362729857 F F F  
0.2232947145365216 0.4695014593243485 0.0369836464820281 F F F  
0.0554016194633391 0.9690109646000096 0.5407264952606070 F F F  
0.1072967316264055 0.9668528664284040 0.9730294981493941 F F F  
0.2713897801283380 0.4700739442572441 0.4680859721377573 F F F  
0.2239435628008195 0.5373791326887272 0.9792806202292326 F F F  
0.0556225894117546 0.0366185895463431 0.4823140054548460 F F F  
0.2224328847080770 0.9686583692226520 0.9750118731331554 F F F  
0.0590378415148507 0.4677648080357955 0.4747753437517446 F F F  
0.1090914917910908 0.5348020146363979 0.9695628594585557 F F F  
0.2749727214601023 0.0364000610047270 0.4708107737146392 F F F  
0.221272553630719 0.0359266213731573 0.0341022317636757 F F F  
0.0592276129239053 0.5351350575144593 0.5337212373601687 F F F  
0.1084247506872700 0.4669110909293153 0.0272708636148735 F F F  
0.2754163861522869 0.9689297214757602 0.5296519029025220 F F F  
0.4950877869838948 0.1389283647151771 0.1295788276265242 F F F  
0.6703643953778169 0.6416397286188769 0.6350419574069193 F F F  
0.4929997802290842 0.3565488191245620 0.1111241583683693 F F F  
0.6725091607329929 0.8508656723854671 0.6262524374644727 F F F  
0.5006658823805523 0.8573819112570717 0.8753287697565924 F F F  
0.3287624514097658 0.3615311727093058 0.3718873604634183 F F F  
0.4973748290104396 0.6420565889076926 0.8690913918204757 F F F

0.3314941808806893 0.1450052453559678 0.3747004291833633 F F F  
0.4955281029588221 0.0657051957369106 0.0651968263407028 F F F  
0.6716706514305244 0.5709715591158186 0.5662852175475379 F F F  
0.4940131033916657 0.4289278143448030 0.0458506171339224 F F F  
0.3331804993779457 0.9340662235218744 0.5600776919609984 F F F  
0.4992669968064405 0.9294210620030086 0.9422463947387598 F F F  
0.6732378230714318 0.4382380375285138 0.4373084995769929 F F F  
0.4961440505230001 0.5678516015159332 0.9303774746591813 F F F  
0.3322901222005825 0.0721369617591989 0.4399122947488650 F F F  
0.4392729612172275 0.0336746779327797 0.0228890987261465 F F F  
0.6147535957076045 0.5409588984501426 0.5236841760474888 F F F  
0.5522080342823728 0.4644574160501662 0.0198892054914737 F F F  
0.3904637108692341 0.9696946250499892 0.5289312349997246 F F F  
0.4411471160676896 0.9668163718392577 0.9627342315092093 F F F  
0.6156166386363466 0.4760917811833778 0.4598804737631212 F F F  
0.5531971455426969 0.5326449666562283 0.9632682055986379 F F F  
0.3900252560705226 0.0371703657240516 0.4700765372588265 F F F  
0.5554510389702898 0.9614119961116430 0.9851590493477147 F F F  
0.3863892213255014 0.4702484482808629 0.4659183657958010 F F F  
0.4380468901373575 0.5317875819378202 0.9550389682331826 F F F  
0.6405107961042518 0.9930748560930027 0.3988463587701574 F F F  
0.5537043975061309 0.0280247408347236 0.0457671745186374 F F F  
0.3866819528468497 0.5375716589676713 0.5249607650339811 F F F  
0.4369311991298304 0.4636591247858775 0.0118467237515816 F F F  
0.6317400048563968 0.9342049876503538 0.4726553899651549 F F F  
0.8371107149198451 0.1456376687035359 0.1245278995538470 F F F  
0.0017722705623555 0.6434612428555297 0.6297713637194207 F F F  
0.8322368324616818 0.3593253882205190 0.1343787474133009 F F F  
0.9981799761695171 0.8591016370672619 0.6318641845949315 F F F  
0.8341105187099345 0.8577146398903110 0.8850049511499236 F F F  
0.6711591619590607 0.3687648564562451 0.3658071159136469 F F F  
0.8363260563187183 0.6423645251188148 0.8860137126749024 F F F  
0.7013054929906843 0.1015873685526714 0.3210623907497592 F F F  
0.8363452969286982 0.0720883674731283 0.0611330732140303 F F F  
0.0018116837840552 0.5704817007347955 0.5646324702807490 F F F  
0.8331463306864843 0.4320456509059696 0.0698218498750620 F F F  
0.6784048101293294 0.9181362450620938 0.5518777373506438 F F F  
0.8347146001020036 0.9319936692711153 0.9467553678542941 F F F  
0.0014134246747730 0.4326888400105773 0.4443256823277082 F F F  
0.8356246792815156 0.5697093618202018 0.9509153159943793 F F F  
0.6943055361741628 0.0402634977642649 0.4058035699647107 F F F  
0.7783785944341091 0.0381494387113719 0.0298644895130025 F F F  
0.9441704824720816 0.5353928512001147 0.5341978428820724 F F F  
0.8913946777397257 0.4652904974759764 0.0384655839303676 F F F  
0.7323947443647540 0.9650173453501267 0.5585382624699804 F F F  
0.7776815473179752 0.9695622139733828 0.9739115355980630 F F F  
0.9439639890327385 0.4679950972102631 0.4752964415603742 F F F  
0.8925958056406245 0.5327680776279351 0.9800012254797821 F F F  
0.7393589247770009 0.0265582995628506 0.4885458074266893 F F F  
0.8926853384265385 0.9660581876834868 0.9778935871882908 F F F  
0.7301585700824944 0.4675829092623758 0.4808840981892857 F F F  
0.7774036098406540 0.5364440894324005 0.9823682544968193 F F F  
0.9407765437395383 0.0332394945523333 0.4730152013636939 F F F  
0.8934578340229038 0.0345051352875245 0.0340519461606945 F F F  
0.7293475483483789 0.5332199078822626 0.5438816909282664 F F F  
0.7761597726731964 0.4689140372066802 0.0406797402275032 F F F  
0.9405038859024941 0.9656730521836607 0.5315970368811023 F F F  
0.9990703321651040 0.2275844047841673 0.1177740451592584 F F F  
0.1663841661554173 0.7304925619777265 0.6148154719157191 F F F  
0.3345341630972811 0.7387753113062274 0.8912421183486572 F F F  
0.1650189013892529 0.2724275999173500 0.3920213985791889 F F F  
0.0605320614210569 0.0594399762640307 0.0548880416285371 F F F  
0.1003650098725615 0.9438527055174148 0.5673336187436959 F F F  
0.2260124396036005 0.4439550860952508 0.445857777605868 F F F  
0.2692903744784729 0.5648107759867713 0.9605647303730152 F F F  
0.2679796006364015 0.9430198493007538 0.9526468060748314 F F F  
0.1041271562160091 0.4415319963359607 0.4512450123163276 F F F  
0.0642524684727022 0.5601561514885205 0.9427652899349752 F F F  
0.2296331358072408 0.0622698475877641 0.4477132662450956 F F F  
0.2658778668674557 0.0629584841036106 0.0584310547579889 F F F  
0.1044696021889351 0.5611741793346425 0.5568508467114128 F F F  
0.0631191347753060 0.4393764723476181 0.0460732012925860 F F F  
0.2304307634235343 0.9422563389746017 0.5528650323790458 F F F  
0.2266284916608612 0.5636095607567881 0.5509461421321262 F F F  
0.0626521730003660 0.9398156217107925 0.9488968111641398 F F F  
0.2681253764039866 0.4442276668289367 0.0639607775938842 F F F  
0.1007674495690978 0.0643161883592427 0.4629434206816399 F F F  
0.3269857765387627 0.2726668003375607 0.1086714719298598 F F F  
0.5023332637591338 0.7630628347792054 0.6053765551735708 F F F  
0.6647649896426699 0.7717120525767101 0.8970679121544052 F F F  
0.4950886626644007 0.2846547918827085 0.3898035613957589 F F F  
0.3937991859712824 0.0620166727432832 0.0374855009373576 F F F  
0.4358114578615329 0.9437269652869773 0.5517144573156116 F F F  
0.5712348520868247 0.4535468832497571 0.4265892560541147 F F F  
0.5986114680738694 0.5596658148291382 0.9437720284118214 F F F  
0.6010571149472668 0.9333753695065425 0.9705282119854672 F F F  
0.4314334480888249 0.4436260127504923 0.4437492201166364 F F F  
0.3934615353488695 0.5579676114476442 0.9287183530940055 F F F  
0.6057880946450140 0.0034562851166129 0.3339224293773313 F F F  
0.5977142032712095 0.0513246637290408 0.0796878700748067 F F F  
0.4319906207593149 0.5635202647110162 0.5479506127453391 F F F  
0.3914009359717951 0.4367648950833143 0.0308129712476699 F F F

0.5893155349179509 0.8987102711094863 0.4675281140069032 F F F  
0.5697092804813764 0.5693878211231791 0.5412401336447203 F F F  
0.3971382544959070 0.9427120957018502 0.9301087636567047 F F F  
0.5968387910832504 0.4380017313047517 0.0452897983394038 F F F  
0.4350045080274825 0.0635040282478556 0.4460152668609823 F F F  
0.6626940474980358 0.1843057165254720 0.1777048403713053 F F F  
0.8334090565396224 0.7683065684517487 0.6215130188629203 F F F  
0.0018122266862903 0.7359933588414478 0.8982586355500501 F F F  
0.8349463255064933 0.2240850283782905 0.3918090653331561 F F F  
0.7336114746814033 0.0656829944695616 0.0517508093147185 F F F  
0.7687890404961664 0.9528687056196645 0.6200521095331766 F F F  
0.8987792837382145 0.4417712438548662 0.4522238031082395 F F F  
0.9381309746725890 0.5576431488351545 0.9558230783328696 F F F  
0.9374293044463471 0.9378301618880087 0.9574518111515076 F F F  
0.7751249137508509 0.4385863463575035 0.4644177256955402 F F F  
0.7328664555261639 0.5644245522817499 0.9600725337150138 F F F  
0.8957458938505951 0.0578449228802143 0.4457116603678628 F F F  
0.9389288678465135 0.0595389678450289 0.0582307569829155 F F F  
0.7737247978945305 0.5560824297116795 0.5769524631546545 F F F  
0.7306507550855557 0.4437969957802963 0.0644744619317095 F F F  
0.8952289407728955 0.9381044257697866 0.5504885354192339 F F F  
0.8991533383416694 0.5619071859035003 0.5575346537493928 F F F  
0.7321983746658702 0.9442147218286721 0.9504918009524204 F F F  
0.9359367927784490 0.4373152125234085 0.0607979405247789 F F F  
0.7806681250152593 0.0635909765361289 0.4965815403151358 T T T  
0.5531858533932324 0.1518642493168626 0.5887850798467194 T T T  
0.6495178378478400 0.2035181205125081 0.3802792387410141 T T T  
0.5815755515820062 0.2034344997314205 0.4837092800678503 T T T  
0.5325815641149058 0.2514151766268092 0.5914894647151666 T T T  
0.5778175192422244 0.2587937543011187 0.2515218278062071 T T T

Structure O2+H2O/7 S=6

1.0000000000000000  
20.9172000884999996 0.0000000000000000 0.0000000000000000  
0.0000000000000000 17.8076000213999990 0.0000000000000000  
0.0000000000000000 0.0000000000000000 12.2158002853000003

Al O C H Fe  
10 64 96 64 2

Direct

0.0806082367659243 0.2516197741755490 0.2548170498662330  
0.2493064332215951 0.7541503392241765 0.7547434168256379  
0.2436676005994975 0.2510188695797327 0.2530867103696636  
0.0832212525240235 0.7526284620637003 0.7545195669593936  
0.5849816068395671 0.7494339703341724 0.7480461777812711  
0.4165525892519106 0.7535089516487148 0.7454889417127879  
0.7552460378206144 0.2481865231575520 0.2512030362472352  
0.9175368566879821 0.7494429705262290 0.7575561286225418  
0.9176854785694064 0.2518553676097839 0.2552727023735054  
0.7519662162976321 0.7466831174893797 0.7616282589639747  
0.6721389693056318 0.2373029774474553 0.1892426386021385  
0.8348149454381968 0.7476153454186407 0.6939062192268344  
0.0007556496087288 0.7505572054512357 0.8215243047786449  
0.8359916337407556 0.2500745045050801 0.3209264504997723  
0.7869927391034244 0.1766635566219509 0.1415960240435548  
0.9475611060675073 0.6708330820964831 0.6562241553986388  
0.8872860769473593 0.3296609097721415 0.1564623044114177  
0.7257653518963521 0.8222120114821534 0.6577412934740218  
0.7793155099505299 0.8286108955949004 0.8602915423255636  
0.9462308248013998 0.3327417315672110 0.3529150800422267  
0.8905192783496478 0.6693634999226398 0.8574497462561991  
0.7341736535199674 0.1614814179124462 0.3495327906302650  
0.8881394273382266 0.8277872328448043 0.8591461549082426  
0.7211134644041962 0.3255113980948446 0.3570445835689439  
0.7818836604658782 0.6706179023283882 0.8612851333064085  
0.9440685285939602 0.1728775295084458 0.3593199464483335  
0.8948122988323802 0.1699646421419242 0.1530298297167156  
0.7239013346065454 0.6660614534733196 0.6646133900316376  
0.7788667681661582 0.3330223636532239 0.1618470117294889  
0.9438962815617814 0.8299960481767370 0.6572506134994250  
0.3232704914820478 0.2522119500778797 0.1802397627948074  
0.5009462759452482 0.7518094011562350 0.6797889583040942  
0.6670027152090277 0.7486238154368092 0.8214600961622177  
0.4956260118821042 0.2646434912094052 0.3152690673058477  
0.4462770445999097 0.1652921096377067 0.1477671944510249  
0.6154498753552923 0.6699236969970461 0.6524440398539646  
0.5472620105514681 0.3295726249371037 0.1236206518063503  
0.3873705520258136 0.8327026938832248 0.6491503960007697  
0.4480639959256819 0.8305870297050894 0.8459509631746505  
0.6170914889003009 0.3515770656380303 0.3195047888017456  
0.5524099953745429 0.6723096144271099 0.8440848230581335  
0.3810985588574091 0.1693940340486059 0.3507894470470596  
0.5570026639706351 0.8289833687353165 0.8473094882564818  
0.3805914195172953 0.3375696292571256 0.3508223377819676  
0.4436666503498058 0.6740802741692374 0.8418717762801597  
0.6829112421611979 0.0876824858638188 0.2255366339493406  
0.5543652198547118 0.1640199626140504 0.1577438783443189  
0.3842893996241871 0.6755986525660880 0.6449222436537534  
0.4384918599276361 0.3320982568571994 0.1275376364692656  
0.6169191373090336 0.8252849102122246 0.6457902679493989  
0.9993056267842353 0.2519539786348142 0.1892315623427321  
0.1661460789250298 0.7531444894588142 0.6889787973530639  
0.3335590647372378 0.7536985912004559 0.8158372297533216

0.1626036437721690 0.2520876536068133 0.3200808444688578  
0.1065345894642751 0.1715494132944814 0.1545714810574483  
0.2754740790464864 0.6753479769772358 0.6523286815853661  
0.2174689516017167 0.3310085231163347 0.1514430376613959  
0.0524393475558876 0.8314590358731661 0.6565580092415267  
0.1118110342229662 0.8317223438006262 0.8530439697064407  
0.2719762607950773 0.3324272891216135 0.3542284658444602  
0.2213545869385931 0.6739456296057202 0.8568316683966755  
0.0525862335135510 0.1713633226802109 0.3572395601279932  
0.2204046936405167 0.8332332469668838 0.8531299169220703  
0.0545814369704093 0.3310984525631209 0.3547220635772164  
0.1125106450790084 0.6735200461106037 0.8558434986545692  
0.2728170290860212 0.1713982623018730 0.3515394177973795  
0.2147677462328235 0.1711971262837352 0.1559314565832110  
0.0562901927425167 0.6725603402221362 0.6533276172965272  
0.1090076217141629 0.3321469661154702 0.1522051194570135  
0.2786381547311736 0.8325819541982388 0.6549318474515530  
0.5680928515952681 0.1909176275243166 0.5950581904236790  
0.6071210899935752 0.1982120812975282 0.3835963496572755  
0.4996718977536093 0.3583922142623940 0.5400652816144196  
0.4786346537060150 0.3242530633457066 0.6202554499313391  
0.1608687945815972 0.1429365575911168 0.1297046118431613  
0.3294036974408363 0.6476575236371086 0.6234294402464571  
0.1632003504771260 0.3600198052660656 0.1268260830367132  
0.3323041088163551 0.8605539788352772 0.6267972592786557  
0.1657519307164752 0.8605827576583845 0.8784484687595771  
0.0003567130246804 0.3602732963008612 0.3793077049746280  
0.1668808049813606 0.6453936273953258 0.8809549110991611  
0.9983125385468894 0.1436533678882583 0.3832555777629437  
0.1617412486172038 0.0703807436397112 0.0644222143016329  
0.3277298326640179 0.5752336204740610 0.5580016990945370  
0.1641887936684801 0.4332404139546283 0.0626044020420494  
0.9975656693630300 0.9320474806735147 0.5667869095110828  
0.1645940592780185 0.9331165671254827 0.9439264807232699  
0.3253217085278134 0.4375061531148163 0.4389396593610502  
0.1662418060563795 0.5719174715684395 0.9446930785512159  
0.9979274806019636 0.0703724988328610 0.447617788194402  
0.1048989608785688 0.0342276847742847 0.0325945443298279  
0.2695849361411831 0.5400898628361992 0.5308692192996464  
0.2221417123485335 0.4696418130081221 0.0376993999804506  
0.0551075126917900 0.9690339532235153 0.5407930397214066  
0.1062898924218333 0.9670017955380285 0.9734377255375293  
0.2683529791682887 0.4724849933992933 0.4725371574779134  
0.2231766741704101 0.5374600564219051 0.9799215389573830  
0.0552807304255801 0.0366707647684796 0.4825069143774952  
0.2214649759635726 0.9691917511711029 0.9758694698064840  
0.0586293105716714 0.4677618157692768 0.4748284226607614  
0.1082950448926124 0.5354281268062696 0.9694775825809252  
0.2706078623787299 0.0335292179366522 0.4730998883152876  
0.2200614261477248 0.0364435394193835 0.0349514519481773  
0.0590502305947670 0.5351272372169489 0.5337061196932142  
0.1072483888714949 0.4675978489551921 0.0272377360492509  
0.2723002742479079 0.9663097108397323 0.5321432583854251  
0.5009276945167125 0.1361114449336283 0.1279617853031204  
0.6701207886365563 0.6405761711284389 0.6323126076914918  
0.4929326205254644 0.3592057133247966 0.1016267063450848  
0.6730148256427938 0.8500176165764849 0.6240258776245226  
0.5026078804383735 0.8571500161742789 0.8727407754807927  
0.3256825056457315 0.3635968742471957 0.3763831866443861  
0.4976717590051209 0.6448314832745318 0.8665584906756889  
0.3266454718884353 0.1420762678231692 0.3764256777914093  
0.5019402793045772 0.0634080050134799 0.0638212041753607  
0.6710084973478156 0.5696326866917074 0.5637639028562453  
0.4941304535455659 0.4325723724329288 0.0396750691172681  
0.3308007317247427 0.9328491532303186 0.5614283544812551  
0.5027550716349150 0.9283344294744753 0.9405675588736341  
0.6720382896335491 0.4361742430373822 0.4355921990189500  
0.4963932316812744 0.5713828990610427 0.9276325457091210  
0.3274229398743681 0.0696292759987870 0.4414557166106284  
0.4448064728063120 0.0329509315105123 0.0224021572372079  
0.6140968109010303 0.5402876814481793 0.5200791189794783  
0.5525131836729368 0.4677914254654117 0.0148700231647309  
0.3876304972863902 0.9689557205872372 0.5295646711509111  
0.4451887330502611 0.9664361917621869 0.9620092702254970  
0.6147735554721260 0.4752746166358635 0.4563570282331494  
0.5536050208809988 0.5363368197290143 0.9596581106960446  
0.3859667650720343 0.0361043943645227 0.4705665129091913  
0.5597865455027756 0.9586050879286920 0.9827609822368250  
0.3833361744858989 0.4733853855887036 0.4648494875712644  
0.4380640416033931 0.5359381295598223 0.9518745227339125  
0.6422985044839717 0.9922363732182610 0.3969206720818425  
0.5595498882492170 0.0249495752265563 0.0439765134447919  
0.3846706205311422 0.5405787833248976 0.5236593520823066  
0.4369570384315885 0.4675283867963031 0.0073303582182377  
0.6327494916032482 0.9337848587616532 0.4710694687837735  
0.8403024647812524 0.1445894217746800 0.1222000342097715  
0.0018482604133390 0.6435447761385151 0.6296924445331585  
0.833282790560594 0.3596250619397227 0.1341259741902448  
0.9979302346603539 0.8590704414536176 0.6316756174352524  
0.8340818189063501 0.8568623662437557 0.8836528071302064  
0.6708438029009535 0.3657232260093498 0.3657695532603890  
0.8362461454648666 0.6419609957570011 0.8848845400490234



0.7053827481594208 0.0989703697327009 0.3185349245915944  
0.8388637374147955 0.0710727817294297 0.0590666080109531  
0.0017314801801121 0.5706217229316844 0.5646612040482843  
0.8339601615880846 0.4323798343441514 0.0697663153160022  
0.6791922361621520 0.9173598548201014 0.5505275265221283  
0.8353498968548191 0.9310395025511660 0.9452747009608886  
0.0008839720006277 0.4329256442178680 0.4445594838109522  
0.8357469982382038 0.5696693926033904 0.9503582403170522  
0.6966243627884193 0.0384936961248379 0.4040156538830095  
0.7804100613389034 0.0381076075599123 0.0281698158177594  
0.9439590378530963 0.5357738141595892 0.5343998220801425  
0.8920330852813704 0.4658162408535017 0.0381796717939618  
0.7334336909701891 0.9637103185000516 0.5579316924042367  
0.7787738314485432 0.9694521723990135 0.9725572063931711  
0.9435282106497903 0.4683803220767167 0.4755479891095993  
0.8929065839574805 0.5331694212027651 0.9794692293397989  
0.7411017096247672 0.0248717676719514 0.4876072014910379  
0.8937848871396299 0.9641767041589572 0.9760193024653410  
0.7289043703360166 0.4651802906442933 0.4798999785130306  
0.7776628167033428 0.5362564794385741 0.9821674105548615  
0.9404222890114297 0.0332204101139443 0.4732013448247793  
0.8954729340708073 0.0326253121839517 0.0320045802282010  
0.7284065141209209 0.5311261038429982 0.5422196608547195  
0.7767608210632753 0.4688717187196339 0.0407971888469941  
0.9401919471506841 0.9656083351751397 0.5316418449529443  
0.9988525389179146 0.2267976361378874 0.1186507531161532  
0.1665026120873953 0.7314664330556623 0.6160080272609191  
0.3353459611201662 0.7385094612322529 0.8921019720144945  
0.1624794555555126 0.2730302500171289 0.3934703707006268  
0.0592225419194095 0.0594450777009803 0.0551363695491030  
0.1000733263794217 0.9438812999486057 0.5673758991008089  
0.2228088929415829 0.4460811046015884 0.4521496312068026  
0.2686581764591852 0.5646609875776041 0.9614204888778684  
0.2670897869540401 0.9436888564803428 0.9535951615363039  
0.1035883026226686 0.4413067480754593 0.4511049874842089  
0.0636478736678578 0.5610332661799932 0.9422861867912821  
0.2249912538353905 0.0588914546992280 0.4504579392499866  
0.2645627736484084 0.0636837538376990 0.0593794460957803  
0.1043380603346595 0.5610880662591741 0.5567444011951920  
0.0618392603786053 0.4402283898692273 0.0457848113425871  
0.2279837909266442 0.9386723430951300 0.5565238944144614  
0.2249918905211032 0.5664443919705300 0.5567289823780260  
0.0617852209646294 0.9397801447771741 0.9490360608045625  
0.2668256129685357 0.4441605169627507 0.0649864289573071  
0.1003783132061852 0.0644649871398418 0.4631052922773036  
0.3215070430690539 0.2819339008753247 0.1133967141366427  
0.5017261598501740 0.7658558745484906 0.6030243745546231  
0.6647799494511933 0.7702841957952542 0.8943378958708869  
0.4930219796781535 0.3040998569600065 0.3704206880704470  
0.4000368250495825 0.0624495203464993 0.0382714825064356  
0.4333215074301326 0.9436508562102363 0.5519231556258674  
0.5704867340614419 0.4540449872955490 0.4210012655165311  
0.5988671396957146 0.5637501423909667 0.9403200337329786  
0.6046906225183489 0.9293585454528491 0.9669948881790412  
0.4278626001242484 0.4476490282909918 0.43777075383031577  
0.3936749040262454 0.5627887254161702 0.9261079517395242  
0.6078382004811187 0.0030112243508535 0.3317305436988403  
0.6039339831507469 0.0472288635572517 0.0780113260515690  
0.4301546027472292 0.5671229931040045 0.5441083797223943  
0.3916551056106303 0.4402021034120966 0.0264918338625716  
0.5900269813309027 0.8987734313932102 0.4660297790182139  
0.5692608181943825 0.5695294652203721 0.5365004735370098  
0.4007256235123715 0.9431356226185732 0.9299648357297088  
0.5969089380914199 0.4405938874819917 0.0398408232180159  
0.4303121754261143 0.0635094619160541 0.4456953746792799  
0.6714201959243995 0.1825355429819185 0.1714519429989817  
0.8334675649891490 0.7688690651173062 0.6207116606226478  
0.0014255707831447 0.7364448755646479 0.8982719110226630  
0.8355297505736161 0.2210810901412809 0.3883634515831867  
0.7360609724947494 0.0663794875592501 0.0504280351835764  
0.7693952846641945 0.9513697767743652 0.6200952815395399  
0.8982981080037644 0.4422529992922399 0.4525075157842318  
0.9382879886683788 0.5582790145455292 0.9550058576732664  
0.9381228477762205 0.9351910798646478 0.9553635087433716  
0.7736534889661507 0.4355305926143482 0.4642888178541194  
0.7330109228207323 0.5639826327583575 0.9598348924287059  
0.8953992887768711 0.0578274750125925 0.4458886575684996  
0.9411983495488396 0.0570594135604929 0.0560523900943048  
0.7728545023531667 0.5536920468325666 0.5754359082775642  
0.7313982136097886 0.4435005768809733 0.0648601674629103  
0.8949359714136393 0.9379821930187785 0.5504726996867984  
0.8990563133967676 0.5625047947486230 0.5578532381623759  
0.7329584389485910 0.9447313963422181 0.9495722896501745  
0.9366422561186288 0.4379962184571294 0.0605126279980125  
0.7825323312284331 0.0616906121087780 0.4958024350263611  
0.5578650818342989 0.1403744257722263 0.6197537244124564  
0.6536937119207678 0.1956582793937118 0.3959054459286001  
0.5859008662720294 0.1999976355422435 0.4562528260887587  
0.5366742538578764 0.2237582805012975 0.6293240297700526  
0.4111822745308120 0.2501062341514600 0.2440445021253933  
0.5832458132677274 0.2595317179497000 0.2391179291199495

Structure O2+H2O/7 monomeric Fe S=7/2  
1.000000000000000  
20.917200884999996 0.000000000000000 0.000000000000000  
0.000000000000000 17.807600021399999 0.000000000000000  
0.000000000000000 0.000000000000000 12.215800285300000  
Al O C H Fe  
11 64 96 64 1  
Direct  
0.4107103064816429 0.2509336422242975 0.2446801230301022  
0.0813378597297566 0.2516154016736258 0.2550194081918445  
0.2493681227248314 0.7542459844878726 0.7540923110524916  
0.2455122761554389 0.2509687760357843 0.2518242907415765  
0.0832441011093985 0.7526367486672479 0.7545588403614053  
0.5848873306246735 0.7493929461081845 0.7487911380641604  
0.4165465221900513 0.7536152121947772 0.7454666262799533  
0.7547659621141409 0.2481522179544484 0.2510678265535785  
0.9175555946364256 0.7494226148784080 0.7574633185775990  
0.9178395495255830 0.2518396353204091 0.2551977473088838  
0.7519686807479742 0.7466343533572047 0.76170768972388561  
0.6709857476988450 0.2374445025508840 0.1901999449200987  
0.8348118394212255 0.7475885167823018 0.6938789650133954  
0.0007794249666574 0.7505550054091024 0.8214913371355770  
0.8359058388044528 0.2499844349236319 0.3206142603917005  
0.7869115721961393 0.1764989817450139 0.1417202170426002  
0.9476154051654889 0.6708614403241676 0.6561105303171685  
0.8874087549742468 0.3296263593652726 0.1564793563652551  
0.7257052863699512 0.8220736230759963 0.657811332377848  
0.7793511997828811 0.8286149755188559 0.8602491467309135  
0.9464768746596416 0.3326578856102630 0.3528352361904417  
0.8905580108573120 0.6693090249036887 0.8573124322267897  
0.736777368032072 0.1617318796372240 0.3497389902108535  
0.8881771621931501 0.8277289621176473 0.8590770868099118  
0.7207884558587374 0.3255862830064111 0.3563529978017423  
0.7819237418263493 0.6706260568140014 0.8613867801859728  
0.9443389210252197 0.1729194427620313 0.3591802726270508  
0.8948318002965568 0.1700727511183684 0.1529330944736657  
0.7239089032957641 0.6659713466992909 0.6648558264108949  
0.7789253903511714 0.3327964023441063 0.1614332037866016  
0.9439221441161568 0.8299973386527133 0.6571732714337162  
0.3280163716994761 0.2517294821523642 0.1824196480459814  
0.5009469078019493 0.7518861792561129 0.6803505708458217  
0.6668603343181212 0.7486458096914277 0.8217913640452190  
0.4905400949511392 0.2618241303079986 0.3122535468263128  
0.4434789560965883 0.1688130817902040 0.1512204368295089  
0.6154487176563180 0.6697923850093706 0.6528684384752835  
0.5455587522520758 0.3289248798037098 0.1253366442265285  
0.3874084646689119 0.8331708907501962 0.6487711854039950  
0.4479314593952712 0.8310025177794963 0.8464014804763951  
0.6164253872900337 0.3511590462405876 0.3202435060766538  
0.552196357733665 0.6715750566044129 0.8447976817866748  
0.3827553435629126 0.1722792424471003 0.3460351426177177  
0.5568000525758318 0.8292770242404239 0.8483688433043858  
0.3814818081675739 0.3354841566156499 0.3453924317822096  
0.4435118983642727 0.6736557201441540 0.8420098290720197  
0.6826078410573095 0.0877147948980842 0.2257569536025802  
0.5518068890171405 0.1652612525157142 0.1587635009196226  
0.3843772369260392 0.6753025724879341 0.6443934176895698  
0.4369024854823736 0.3305167185261437 0.1346272575183416  
0.6168512115993133 0.8252242731015705 0.6460546554319888  
0.9997882716824684 0.2519207921888618 0.1893499407634735  
0.1662426088350290 0.7531547627616664 0.6887915652486595  
0.3335601598311838 0.7537145276816580 0.8152577641228526  
0.1637028955959474 0.2520547252082874 0.3192563442303132  
0.1075464797303957 0.1716816775032013 0.1549318445720648  
0.2756031631487347 0.6748074243815720 0.6515321607968574  
0.2188782082697117 0.3305241954428668 0.1502387824645000  
0.0524689910155704 0.8314445754947937 0.6565620836050279  
0.1118467882258445 0.8317853410616673 0.8530777346533994  
0.2730144390591197 0.3319372371018030 0.3528171914818572  
0.2214069370831693 0.6739531883981210 0.8565790899258371  
0.0529050495546330 0.1713904738591205 0.3573593673766199  
0.2204438946381928 0.8332832790369188 0.8528476483440272  
0.0548806904209850 0.3311458025864009 0.3546417876981971  
0.1125610140619174 0.6734851021007170 0.8559028425914962  
0.2744129342172789 0.1722741706002703 0.3501177425714485  
0.2159231038117188 0.1716707357613351 0.1545605221581343  
0.0563467469639311 0.6725695974582685 0.6533533703549158  
0.1102504285107485 0.3318868830209207 0.1524355942576076  
0.2787207426593105 0.8333576369326832 0.6540806143726028  
0.5671801675734081 0.1901160658247339 0.5950587125254155  
0.6056776028631562 0.1986344497350389 0.3840850097369747  
0.5002240201352584 0.3584128501911045 0.5426433031462183  
0.4779528184071930 0.3249817372617276 0.6225007396526915  
0.1618306082181691 0.1432690255042345 0.1294096114184155  
0.3296007965310996 0.6471131226968863 0.6227561189225571  
0.1643924431605409 0.3596330524243415 0.1265903825589640  
0.3324746806565426 0.8613406695044085 0.6261316605160182  
0.1658127696309953 0.8606384576621061 0.8783908145126604  
0.0006318884684081 0.3602300437717770 0.3792116347176698  
0.1669628415071177 0.6453891426187309 0.8809437413534597  
0.9986062037189081 0.1437156227670803 0.3832274784065354  
0.1623009618930076 0.0705673935421016 0.0643826415372431

0.3282413246028851 0.5743632229045523 0.5572308633983628  
0.1649054374567981 0.4330632434320543 0.0626739299729310  
0.9976310020708336 0.9320592548637324 0.5667704404929250  
0.1647378876072032 0.9331756948982778 0.9439804070605866  
0.3268453234210011 0.4361409115608011 0.4373500424284889  
0.1664265033311661 0.5719145614338179 0.9448494682656959  
0.9980993779201636 0.0704148905958143 0.4476122339746154  
0.1053308144595157 0.0345231115195117 0.0328092000456094  
0.2704154076611884 0.5384224726652356 0.5301257925833719  
0.2226709522084536 0.4697824224726606 0.0376716690736175  
0.0551899721187562 0.9690209888007522 0.5408532019827285  
0.1065272667877518 0.9672535503625245 0.9736846865794908  
0.2696773568497699 0.4707728460103089 0.4716268951006022  
0.2234577553673804 0.5376391132073176 0.9799805395576842  
0.0554215128796771 0.0366663490698281 0.482582302237440  
0.2216898902705668 0.9691151525978499 0.9758091640819515  
0.0587517116584676 0.4677861343135841 0.4748114532945859  
0.1086030460721938 0.5351821402763908 0.9698657840708818  
0.2722487623784836 0.0354884175028923 0.4713570976715131  
0.2204785843129539 0.0363989951828896 0.0348090583809035  
0.0591346970257247 0.5351581901678862 0.5336821941509839  
0.1078031608677621 0.4672943637213380 0.0275894876287040  
0.2732769107501788 0.9682025895901284 0.5306455307251774  
0.4976446457564515 0.1384826652440656 0.1301245436020392  
0.6701130621292769 0.6404770979456066 0.6325508089651003  
0.4908205195431691 0.3580457366133820 0.1052816681706027  
0.6729475523064726 0.8498878038238300 0.6240902614501316  
0.5023275726783389 0.8579373047461691 0.8734890494762578  
0.3271364734971559 0.3623673974205560 0.3736676906411335  
0.4973748114898081 0.6441105283877367 0.8669989467089427  
0.3288528782797041 0.1439903263824687 0.3736700129801677  
0.4992261173311826 0.0653911509157599 0.0654350858897569  
0.6710647386163091 0.5695793853702420 0.5637880955112213  
0.4920879312179338 0.4312331175099122 0.0418427434703510  
0.3313728409814325 0.9339642312130106 0.5606057118671722  
0.5019034289346423 0.9295455459013588 0.9413267072518020  
0.6719853629367023 0.4361761483618935 0.4352413889938002  
0.4956591348555322 0.5703680936150056 0.9282357610339194  
0.3293642719608934 0.0713863715004189 0.4395959684065383  
0.4427957899783104 0.0338863683917422 0.0229535907219694  
0.6141954301961118 0.5404802865775261 0.5195980089805896  
0.5507310825562168 0.4661210416139737 0.0165306876379886  
0.3883845560106282 0.9698230987271756 0.5288582075023928  
0.4440728830450848 0.9672928824823310 0.9623734550502863  
0.6148388412561128 0.4755204715034121 0.4557636795657009  
0.5524614391282419 0.5345912611575182 0.9608629220237798  
0.3873761781130639 0.0370252247316474 0.4695537834880594  
0.5583778630811983 0.9607888918944649 0.9843740719257085  
0.3844588268642549 0.4728014165892793 0.4634535222779123  
0.4371675753860199 0.5352040155903895 0.9524745660348828  
0.6423151148036285 0.9921508254442086 0.3969017056114632  
0.5572360617629751 0.0272366710185332 0.0456960287190588  
0.3852985668860910 0.5400591490210355 0.5224870104109793  
0.4354165433714128 0.4668849891143398 0.0085282101937363  
0.6327836590610694 0.9336246578308580 0.4709327883439793  
0.8403136863925570 0.1446045281875452 0.1222426425565679  
0.0019038840541533 0.6435609601055596 0.6296364119210576  
0.8334154941484605 0.3594751867101929 0.1339820261615905  
0.9979600366754474 0.8590702416329076 0.6316421272301237  
0.8341389709795164 0.8568464975143432 0.8835852505856867  
0.6704145100573790 0.3655951053649713 0.3655622815897930  
0.8363002202590402 0.6419273272472364 0.8848590443527505  
0.7051011043194887 0.0991053491885981 0.3187210943618456  
0.8389981452053993 0.0710688003627010 0.0590538574113728  
0.0018091533848319 0.5706398796439744 0.5645915408036114  
0.8340877060623410 0.4322785997332673 0.0696642879763986  
0.6791959990497097 0.9171813272362481 0.5504385610327364  
0.8354580895970265 0.9310334965371616 0.9451834383631736  
0.0010274947254366 0.4329105235324797 0.4444852348627065  
0.8358318203073540 0.5696215487514412 0.9503067760159613  
0.6965747564121315 0.0384995041930002 0.4041179195702992  
0.7805573792734167 0.0381222045596250 0.0280923409649396  
0.9440483246089870 0.5357651420930226 0.5342731463485472  
0.8921531464521683 0.4657596403587350 0.0380866116257964  
0.7334601880093556 0.9635208914554310 0.5578021698818801  
0.7788975824357025 0.9694864008598155 0.9724344151197283  
0.9436574677769671 0.4683603916690890 0.4754262886057602  
0.8930021998673384 0.5331281114288549 0.9793931891301489  
0.7411081030234203 0.0247649729310264 0.4875934509525567  
0.8939013111783427 0.9641417765023118 0.9759744575938576  
0.7288609788518456 0.4649388844377736 0.4799962939447269  
0.7777635254852839 0.5361787966114296 0.9821328444477662  
0.9405708915498134 0.0332890682177501 0.4731361088216596  
0.8956109307959478 0.0325929700638533 0.0319868849135993  
0.7283992279299395 0.5308315266119161 0.5425114461971439  
0.7768906816022085 0.4687746225779527 0.04072162121949048  
0.9402804167067854 0.9656667974655770 0.5315644074188092  
0.9992699436909950 0.2266903271865468 0.1188199682554639  
0.1664546236900910 0.7315262800858664 0.6157886293252312  
0.3352414064301990 0.7385430118342123 0.8915586500795344  
0.1637353274264963 0.2727525001760041 0.3928053445084544  
0.0596858804128448 0.0598162984129540 0.0554256959560677

0.1001377539992209 0.9438415204839170 0.5674804053831500  
0.2241306426779542 0.4442119958851712 0.4516357357255643  
0.2688513472784475 0.5650018707372237 0.9614222045524381  
0.2672530186178226 0.9435043617666756 0.9534880542098580  
0.1037156623936128 0.4413424662655526 0.4511248027374588  
0.0638387426686194 0.5606145639373261 0.9428419305270421  
0.2266170372490798 0.0608510221827795 0.4487294189515799  
0.2650280728331102 0.0635466924069251 0.0591567049467511  
0.1044133332742983 0.5611361027932579 0.5567456529023115  
0.0624268406083995 0.4398446345221382 0.0461958316652798  
0.2285980525911327 0.9411060344800209 0.5546320516145791  
0.2255633764206341 0.5642235777590504 0.5560458775573169  
0.0619242802111781 0.9401720334396425 0.9494391451029741  
0.2674158740942476 0.4444198984687044 0.0648569580361192  
0.1005365561868905 0.0644310797522992 0.4632489187959068  
0.3263007246976976 0.2798809321257355 0.1142333917280677  
0.5018864194875556 0.7661753133443520 0.6036627868465287  
0.6647677020153465 0.7705088575967590 0.8945535092391794  
0.4886051789870197 0.3005715605171573 0.3683999451917289  
0.3976114695944680 0.0626620366295189 0.0380868546214521  
0.4338903163848399 0.9442103191450325 0.5515135809344160  
0.5705970196643404 0.4544054656375102 0.4201075428412421  
0.5980502715126375 0.5614167015999932 0.9417647512388805  
0.6037147958139875 0.9321850743235587 0.9693107472005328  
0.4292542396030681 0.4477302966722247 0.4363091041045183  
0.3929606001564777 0.5622904620967955 0.9263462175862338  
0.6079000173304210 0.0029266706438641 0.3316412889549719  
0.6016029351115544 0.0495850146077403 0.0797717128588463  
0.4306374010292321 0.5670090896369959 0.5426977526086022  
0.3897711542625353 0.4402557798752816 0.0273386299385734  
0.5900857321636250 0.8985899210691967 0.4657351641224960  
0.5693956887808537 0.5698408573012546 0.5357648221943307  
0.3998882379030985 0.9435963206350853 0.9298600394494774  
0.5951262439638427 0.4388896434822928 0.0415040696129585  
0.4320571567886832 0.0638224677269748 0.4450501875147529  
0.6704406648440469 0.1828575742048774 0.1716653326410692  
0.8334307822911331 0.7688138910768137 0.6206692497474346  
0.0014040855501537 0.7366070675670162 0.8983029777553374  
0.8354674966671157 0.2210209942918769 0.3880850299946078  
0.7362213058471956 0.0664279071989154 0.0503475217212029  
0.7694592192135635 0.9511314708412857 0.6198857830501984  
0.8984173640150022 0.4422457819900890 0.4523659177431643  
0.9383750855449468 0.5582595620184873 0.9549193428667346  
0.9382321393528495 0.9351252444763767 0.9553322038640927  
0.7736088811356171 0.4351733764573438 0.4647561008849250  
0.7331001581190123 0.5638924300727602 0.9598437927330092  
0.8955537551115491 0.0579145126979469 0.4457951828070130  
0.9413656988615674 0.0569605774707278 0.0560307085327188  
0.7728458771883138 0.5531385147169313 0.5761496558851977  
0.7315418338184654 0.4433774361514000 0.0647964537518314  
0.8950059605197244 0.9380647965118688 0.5503367126786634  
0.8991343117669655 0.5624906702854429 0.5576776993811839  
0.7330769017295415 0.9448113951424809 0.9493957985890171  
0.9367872932818514 0.4379786431311156 0.0603872558446866  
0.7825656634938868 0.0615476089010492 0.4958245808549790  
0.5583822145140152 0.1391436579065356 0.6194752235524296  
0.6523516955767609 0.1963421662833667 0.3953578746760136  
0.5848748400741832 0.1998468959350521 0.4571574026986157  
0.5354281157124463 0.2218455251823658 0.6305856016125252  
0.5810473580526889 0.2590828929572120 0.2406661419932657

Structure TS16 S=6

1.0000000000000000  
20.9172000884999996 0.0000000000000000 0.0000000000000000  
0.0000000000000000 17.8076000213999990 0.0000000000000000  
0.0000000000000000 0.0000000000000000 12.2158002853000003

Al O C H Fe

10 64 96 64 2

Selective dynamics

Direct

0.0819282231748844 0.2505992077584764 0.2540723358532091 F F F  
0.2491055137946887 0.7529628297121391 0.7532472212413808 F F F  
0.2455376244789917 0.2504100513490215 0.2520502516223928 F F F  
0.0831608858633999 0.7519444440345922 0.7534564388540801 F F F  
0.5847967388586142 0.7494072035846031 0.7456044651869860 F F F  
0.4162325225332211 0.7538860794640740 0.7427725849237419 F F F  
0.7550915096127326 0.2501652072942520 0.2529875406968500 F F F  
0.9174837651551826 0.7490193911875025 0.7551199875347621 F F F  
0.9184013336471537 0.2511783419910358 0.2538584114110662 F F F  
0.7517375206809831 0.7456858726066926 0.7582174470319174 F F F  
0.6745939436422006 0.2455248480722361 0.1776777947730821 F F F  
0.8347369429141906 0.7469121755617110 0.6911316989431668 F F F  
0.0006496814848020 0.7501982813181556 0.8197862102981546 F F F  
0.8367577306024572 0.2503809702002116 0.3202502209880151 F F F  
0.7835088768355405 0.1702578326493551 0.1515450943782213 F F F  
0.9477224771851596 0.6703115537222430 0.6538724528563478 F F F  
0.8908719398250398 0.3298935618079497 0.1553477292956984 F F F  
0.7259566697939164 0.8226415617139011 0.6549861447044805 F F F  
0.7791218740866412 0.8273052621154946 0.8581336823118022 F F F  
0.9477962965120028 0.3311225225300518 0.3527482367876331 F F F  
0.8907268392296999 0.6694050031933472 0.8550899303183215 F F F  
0.7307787429106369 0.1696046939342750 0.3579962539932922 F F F

0.8879460076592807 0.8276696815107485 0.8564265861919012 F F F  
0.7227183048467225 0.3294231577681899 0.3494913296693269 F F F  
0.7820719866272583 0.6691835711253944 0.8578209413843325 F F F  
0.9447556869417610 0.1713833078212659 0.3560707311871738 F F F  
0.8920127698742277 0.1701875313525321 0.1508944104303467 F F F  
0.7231545391234988 0.6653433559683393 0.6612633406522548 F F F  
0.7825351292420564 0.3308701565413585 0.1571129591315312 F F F  
0.9441229427442295 0.8293597485214974 0.6550132233293340 F F F  
0.3263838742612180 0.2515249465648637 0.1819053253926839 F F F  
0.5007206463330931 0.7520259706207142 0.6771844933822067 F F F  
0.6670272800645449 0.7479459003431046 0.8189082892788520 F F F  
0.5051482365961704 0.2551885364716426 0.3103427624222945 F F F  
0.4462992023387855 0.1648435993528565 0.1482982013191005 F F F  
0.6146801634878472 0.6691845032494399 0.6505082656209069 F F F  
0.5479929302560080 0.3356002849142712 0.1168204101441574 F F F  
0.3866712023849885 0.8319348516807139 0.6467261909685433 F F F  
0.4476253584289580 0.8310416983549516 0.8426511870712332 F F F  
0.6160968387051184 0.3444371507928068 0.3229911438936099 F F F  
0.5515401837148417 0.6734260992443453 0.8422758097040060 F F F  
0.3826568832959367 0.1695896632509957 0.3544185578393098 F F F  
0.5565658050237090 0.8291288842683997 0.8449535535086454 F F F  
0.3842058651926479 0.3346780416611139 0.3534800538210803 F F F  
0.4427400025608321 0.6758834562329312 0.8398774375873401 F F F  
0.6440447668918038 0.1185462680435294 0.2745552953567657 T T T  
0.5537344319399793 0.1735713443734994 0.1294761754828215 F F F  
0.3842914279167076 0.6752641696753443 0.6428693198944799 F F F  
0.4395919750612833 0.3350040541927228 0.1327743379858930 F F F  
0.6171053570485725 0.8251513360800828 0.6455009268834360 F F F  
0.0004364302124813 0.2501619006899389 0.1882845573797738 F F F  
0.1660278947632605 0.7519134634670479 0.6878667189447185 F F F  
0.3331590136265419 0.7535459611864894 0.8136861591477214 F F F  
0.1643672509180831 0.2512576798031105 0.3192812394483866 F F F  
0.1083694450149721 0.1705748539270644 0.1545119396105719 F F F  
0.2755280537233347 0.6732778908249486 0.6515193568086772 F F F  
0.2195020148190991 0.3310294892113390 0.1521375309045894 F F F  
0.0526817952268956 0.8308291677091262 0.6552073071322724 F F F  
0.1117999351796968 0.8312836138886937 0.8518894771768331 F F F  
0.2754137841500395 0.3301778055169962 0.3548231368735486 F F F  
0.2211940877646299 0.6732705163216366 0.8560626633532635 F F F  
0.0533735939236095 0.1710137144084314 0.3567433200741235 F F F  
0.2203716008345964 0.8325007117317753 0.8513970716654597 F F F  
0.0561493475194155 0.3305848947610102 0.3530374047703617 F F F  
0.1123465557405794 0.6727507400174844 0.8553768718978816 F F F  
0.2743503231668925 0.1701032446796589 0.3495475650342428 F F F  
0.2166495100720596 0.1711433983440358 0.1538829929436432 F F F  
0.0564490792057413 0.6719064020666892 0.6521563116890619 F F F  
0.1109480750442486 0.3306082367291694 0.1509930789366365 F F F  
0.2779169823375653 0.8312231672627490 0.6524578708566864 F F F  
0.5552015313941681 0.1515316989021045 0.6207075983448931 F F F  
0.6471162942582197 0.2532226154790803 0.5332762217917772 T T T  
0.5027284282165212 0.3501276624864644 0.5517094005224266 F F F  
0.4748180390622281 0.3106754280055952 0.6196121166183204 F F F  
0.1626867994066288 0.1424710114581345 0.1285647674720707 F F F  
0.3297013036576999 0.6462300907246856 0.6224450549610197 F F F  
0.1649875014772917 0.3592867462088236 0.1266743646746988 F F F  
0.3315054435072398 0.8594835954513087 0.6246808664880135 F F F  
0.1658514883268438 0.8600212752978464 0.8769981739894774 F F F  
0.0017952780470978 0.3593043942645693 0.3782134476368242 F F F  
0.1667553971818094 0.6447292243674241 0.8804924253207389 F F F  
0.9990453272521478 0.1428038696320257 0.3813649871729368 F F F  
0.1632462632576974 0.0699688888336141 0.0631010592782459 F F F  
0.3288909743317276 0.5732127877657405 0.5581287551449350 F F F  
0.1654668054127839 0.4326142860134325 0.0626411961826179 F F F  
0.9980239562176862 0.9313587176105003 0.5649935360528744 F F F  
0.1650939296939171 0.9326413752714302 0.9424781681512613 F F F  
0.3282739489463324 0.4347986786382378 0.4406963821966485 F F F  
0.1664400410408149 0.5713380251479734 0.9445887485438504 F F F  
0.9985758672892544 0.0695881594009506 0.4457675424005103 F F F  
0.1061445813807396 0.0340831423104930 0.0318578672958338 F F F  
0.2712671219872931 0.5359886922501786 0.5337927249382304 F F F  
0.2231307476193862 0.4695170360930661 0.0373864448470229 F F F  
0.0556105465695822 0.9683620784098181 0.5394047160619238 F F F  
0.1070420398289968 0.9668582630072819 0.9726430859051760 F F F  
0.2709187986383057 0.4681389834592267 0.4760916631505623 F F F  
0.2236291393692582 0.5373094812865276 0.9795277278709733 F F F  
0.0558759573966228 0.0359781875023373 0.4810921715682070 F F F  
0.2222082353754828 0.9684755026125771 0.9737850021309455 F F F  
0.0596313409447191 0.4674492063301443 0.4731616074606109 F F F  
0.1087627627383654 0.5344318902768350 0.9698978843543884 F F F  
0.2707825428879858 0.0328273646510979 0.4711928741813551 F F F  
0.2213050767753444 0.0357511894699911 0.0328822556087829 F F F  
0.0597202462544004 0.5348797219846730 0.5318949532185187 F F F  
0.1082510146988724 0.4665791752658706 0.0276778718646895 F F F  
0.2719343075448535 0.9654266479212907 0.5297491666392133 F F F  
0.5004417888853183 0.1400081202972530 0.1154723465148209 F F F  
0.6692088080394356 0.6396507485866678 0.6296329215401570 F F F  
0.4919386980828122 0.3636621480176885 0.1009997049912101 F F F  
0.6728512860793856 0.8513923181472052 0.6246918559068959 F F F  
0.5021677853096662 0.8575242649035388 0.8696682965755969 F F F  
0.3290380721697304 0.3609959248864172 0.3781756390002826 F F F  
0.4966289907971060 0.6467628843520004 0.8650837176292185 F F F  
0.3278216666120457 0.1413926347566701 0.3770218894591153 F F F

0.50103423262056690 0.0661015965942582 0.0548029007691966 F F F  
 0.6697636277794743 0.5685546860343464 0.5612106389945453 F F F  
 0.4918555113544230 0.4365800541243203 0.0395906987718817 F F F  
 0.3302044844622145 0.9318974155942499 0.5599700539380592 F F F  
 0.5020869704568653 0.9290711596692418 0.9365451279799970 F F F  
 0.6703834133211828 0.4348533089793207 0.4330790036498797 F F F  
 0.4946893683885421 0.5741770964774560 0.9272849099533929 F F F  
 0.3279793750672013 0.0688434976168040 0.4412269453472817 F F F  
 0.4436436294971031 0.0330998682627595 0.0189830816739800 F F F  
 0.6129396464509327 0.5397821508516714 0.5161681472411317 F F F  
 0.5504957424761443 0.4703920697341815 0.0125558658222573 F F F  
 0.3873707720603079 0.9679089846297799 0.5298757416048758 F F F  
 0.4442096384451446 0.9657453610890769 0.9606125630437958 F F F  
 0.6133598182917197 0.4745021909279927 0.4528116947388909 F F F  
 0.5518994176803673 0.5386061045521799 0.9572471591100822 F F F  
 0.3862280675439678 0.0351737325544974 0.4713681543017927 F F F  
 0.5593109278068695 0.9614183340871705 0.9742672725900832 F F F  
 0.3858306212289051 0.4723353948095550 0.4645642921694062 F F F  
 0.4360491589333151 0.5402730991985791 0.9538097537596926 F F F  
 0.6283618472387147 0.0095349832791101 0.4296749574814598 F F F  
 0.558886691048600 0.0288938756555837 0.0325296408784297 F F F  
 0.3861952511668179 0.5400583276612210 0.5222457596380679 F F F  
 0.4345798114629886 0.4721667959487803 0.0098613857850793 F F F  
 0.6239830117018386 0.9458911327226218 0.4953490422626601 F F F  
 0.8376023780858333 0.1417696455921273 0.1261250152343507 F F F  
 0.0020666097820694 0.6429513646060840 0.6278677464680129 F F F  
 0.8366764213904645 0.3586880629886622 0.1310357205350314 F F F  
 0.9982368913042237 0.8584094004580294 0.6298970522263048 F F F  
 0.8336904269459069 0.8558992109167036 0.8816853743413233 F F F  
 0.6701497964611534 0.3641453249040154 0.3641553935012425 F F F  
 0.8366065154397262 0.6412150248611539 0.8819162776022864 F F F  
 0.6862540378666321 0.1185233482886354 0.3471685167223805 T T T  
 0.8367757894720285 0.0685039350475378 0.0620396083359154 F F F  
 0.0022318924436746 0.5700405242685349 0.5627889324608049 F F F  
 0.836838055700057 0.4313750933698017 0.0664041500086299 F F F  
 0.6766432954287396 0.9220911313011015 0.5576186432599073 F F F  
 0.8344544135664194 0.9295636026051000 0.9448845464795710 F F F  
 0.0020478062293066 0.4321535191056753 0.4430579870654157 F F F  
 0.8369290976284844 0.5688390231610398 0.9472270018863185 F F F  
 0.6844951544713567 0.0531430726437705 0.4268479247848660 F F F  
 0.7787086069062497 0.0354609364768379 0.0292215537028682 F F F  
 0.9446277745520391 0.5348306097861055 0.5324661347240820 F F F  
 0.8945120844188494 0.4660214695331533 0.0353824952840824 F F F  
 0.7327904999981243 0.9654609923018214 0.5551604982096592 F F F  
 0.7775825131021108 0.9674962769949644 0.9718285308166585 F F F  
 0.9445228748959096 0.4673269525903123 0.4738495098884030 F F F  
 0.8945409837388851 0.5334352643690252 0.9767532740231673 F F F  
 0.7362905295052329 0.0309062979732317 0.4921249210360941 F F F  
 0.8925405355987905 0.9627311417923252 0.9773617525875054 F F F  
 0.7271946406971779 0.4633478378804341 0.4785085448865658 F F F  
 0.7792797481140141 0.5341891017089395 0.9784290523511956 F F F  
 0.9410158456361941 0.0324499825802320 0.4710072153375933 F F F  
 0.8936578269338682 0.0306879486718472 0.0347697212466471 F F F  
 0.7269064451495169 0.5291347276126075 0.5410658706186382 F F F  
 0.7792301292641142 0.4667182059468686 0.0368544558107544 F F F  
 0.9407132556303495 0.9648729894896633 0.5294985802103369 F F F  
 0.0002373017317652 0.2287701146229111 0.1151567781784024 F F F  
 0.1661409718750164 0.7300846702444659 0.6149880345697767 F F F  
 0.3353485413357262 0.7380119902737476 0.8897687561711720 F F F  
 0.1641216924979219 0.27174286311111432 0.3929482375489144 F F F  
 0.0606448762000795 0.0595468027771275 0.0548787360999796 F F F  
 0.1005135032246685 0.9432433637632442 0.5663656362415352 F F F  
 0.2257575882136962 0.4401679910254117 0.4577703360762939 F F F  
 0.2689001955077970 0.5648481370229632 0.9606253505944977 F F F  
 0.267653333396449 0.9427620699773769 0.9509735149439891 F F F  
 0.1047360019012586 0.4413323757009024 0.4494449356906216 F F F  
 0.0638795261553895 0.5596593227026716 0.9430863589312324 F F F  
 0.2253831830901021 0.0583459025169191 0.4476929001203160 F F F  
 0.2660189688651968 0.0627614946335413 0.0567152653199940 F F F  
 0.1048883979426307 0.5611767007190238 0.5548289250764356 F F F  
 0.0630308034929570 0.4388851307282238 0.0465418508687563 F F F  
 0.2274474693582107 0.9377012262541982 0.5530341030590193 F F F  
 0.2264043488376757 0.5608911382553927 0.5613243557860343 F F F  
 0.0623199936401519 0.9399131517382813 0.9487307342917433 F F F  
 0.2680181344984689 0.4443962642699475 0.0643841478347227 F F F  
 0.1009883318265850 0.0638376263894855 0.4620138970528913 F F F  
 0.3260517449236673 0.2812823428198215 0.1150077363609512 F F F  
 0.5016035626300734 0.7636925190428698 0.5996005928721004 F F F  
 0.6651990792935294 0.7699066123821865 0.8916334630501623 F F F  
 0.5095532468524624 0.2858962519308221 0.3761760302057269 F F F  
 0.3985791513986996 0.0613896694554938 0.0369615607022382 F F F  
 0.4327817900267306 0.9424874009509381 0.5534612964850538 F F F  
 0.5689963305580648 0.4533701911449484 0.4175078257542992 F F F  
 0.5971702032120021 0.5652262079119552 0.9359049646957303 F F F  
 0.6043988469043953 0.9330821538736345 0.9567167913650110 F F F  
 0.4306818521174520 0.4475242530963257 0.4370266845674777 F F F  
 0.3918625206490702 0.5680361743293219 0.9291804273752717 F F F  
 0.5887492388851499 0.0261189995382267 0.3767820031236511 F F F  
 0.6033991177344760 0.0534261509590550 0.0622958253376353 F F F  
 0.4312856723941820 0.5681662728035164 0.5406581794243408 F F F  
 0.3892216366471004 0.4456633181531799 0.0310521000592203 F F F  
 0.5801458650874025 0.9127216087956853 0.4973855775992675 F F F

0.5682319271893945 0.5695397910316302 0.5315441967660135 F F F  
0.3996427748240095 0.9406989670084300 0.9319828351816639 F F F  
0.5947210935680616 0.4422024540048781 0.0356856392133409 F F F  
0.4307445801027541 0.0625569042863887 0.4474513508355145 F F F  
0.6710195067034874 0.1916661437262590 0.1600680266148586 F F F  
0.8334870970922807 0.7669309499368779 0.6172052825805778 F F F  
0.0009743199244667 0.7354937165802298 0.8963075232288915 F F F  
0.8362748867055885 0.2212847858636806 0.3876147239902963 F F F  
0.7340246449494643 0.0638309184176151 0.0494671536767513 F F F  
0.7736836867025758 0.9473834689743725 0.6039649272997281 F F F  
0.8993932983199997 0.4409190995539944 0.4508932481946317 F F F  
0.9396193994947240 0.5594740513762488 0.9526879625848892 F F F  
0.9371316036207560 0.9342202314393830 0.9568299884062625 F F F  
0.7717617948257711 0.4330513886836158 0.4641614205545679 F F F  
0.7342825775578135 0.5609908583643843 0.9557667159646286 F F F  
0.8960381982477230 0.0570822539750111 0.4434976913061632 F F F  
0.9391756076019533 0.0552371708444284 0.0597420778682078 F F F  
0.7713231818576460 0.5507334675223845 0.5757681974017288 F F F  
0.7342150937639360 0.4402890030456561 0.0603514179304767 F F F  
0.8954616698103379 0.9372094737030920 0.5481865023606929 F F F  
0.8995715609912054 0.5613000293402450 0.5556872382295026 F F F  
0.7320363838035391 0.9430932992224115 0.9467003697576644 F F F  
0.9395030962434419 0.4391803956809071 0.0580415745622389 F F F  
0.7798553237134200 0.0646312354646668 0.4918298046089760 F F F  
0.5443869903057674 0.1205443566435775 0.5576526626202778 F F F  
0.6814305108999997 0.2278464236406956 0.4937884575287196 T T T  
0.6221067560258133 0.2132344515547892 0.5686250317251369 T T T  
0.5197643068206972 0.1867397889435338 0.6279248970640978 F F F  
0.4139484066606940 0.2487447531611195 0.2486981668804020 F F F  
0.5845316930598179 0.2639925994069288 0.2187522169013033 T T T

Structure TS16 monomeric Fe S=7/2

1.0000000000000000  
20.9172000884999996 0.0000000000000000 0.0000000000000000  
0.0000000000000000 17.8076000213999990 0.0000000000000000  
0.0000000000000000 0.0000000000000000 12.2158002853000003

Al O C H Fe

11 64 96 64 1

Selective dynamics

Direct

0.4131177100127061 0.2509495511031332 0.2452975003411098 F F F  
0.0836411140514741 0.2504793362209483 0.2530033571700372 F F F  
0.2497417305595491 0.7534262113841663 0.7486545355383711 F F F  
0.2486076284641001 0.2504872777331144 0.2499733080241100 F F F  
0.0836514983784937 0.7517975651164690 0.7522179665779589 F F F  
0.5840984362768040 0.7497864409473607 0.7492820103995399 F F F  
0.4162138135505771 0.7545216942882149 0.7421910036017820 F F F  
0.7539330194634246 0.2500600271674642 0.2540865177549207 F F F  
0.9175997379039487 0.7488663139453848 0.7548743729272118 F F F  
0.9186874247356158 0.2508998703153367 0.2539217379278966 F F F  
0.7514186571833790 0.745507700546084 0.7590683290087696 F F F  
0.6721259279127381 0.2458220486818874 0.1804914393047241 F F F  
0.8345263864628265 0.7467467922077304 0.6914120916562680 F F F  
0.0010207484742253 0.7500114408519138 0.8190929650829659 F F F  
0.8363520907504594 0.2504464993143145 0.3207664634685088 F F F  
0.7826832490382500 0.1703820331562085 0.1522860896131633 F F F  
0.9479562714062695 0.6699585510179205 0.6534960526818878 F F F  
0.8903590943946753 0.3293788163134295 0.1557539079585339 F F F  
0.7252600409702339 0.8226743771479690 0.6564813199622606 F F F  
0.7791420995697536 0.8270045030573669 0.8588275463908275 F F F  
0.9488712254222307 0.3307111466951795 0.3522156383416331 F F F  
0.8907759078409967 0.6691329556261962 0.8550092578526218 F F F  
0.7296735630723248 0.1692367423298720 0.3584665872272339 T T T  
0.8879768876958636 0.8277595425078346 0.8563319811088519 F F F  
0.7203879919495293 0.3292511896483177 0.3506706794561794 F F F  
0.7821000766138013 0.6688439565104645 0.8579840145578856 F F F  
0.9457852735793750 0.1714552436558634 0.3555729169686046 F F F  
0.8913105520325004 0.1701615625588815 0.1516737786773277 F F F  
0.7221827855022980 0.6653180026219232 0.6620347096775845 F F F  
0.7818983246694131 0.3308648914846799 0.1585182557219085 F F F  
0.9442944604227463 0.8293549053430809 0.6546514009100548 F F F  
0.3306076074425164 0.2512793067481667 0.1819772482182032 F F F  
0.5008966892663480 0.7525899478046654 0.6794431864788848 F F F  
0.6665227246383196 0.7480311441379470 0.8212991198401340 F F F  
0.4972306350495330 0.2557045059145011 0.3059612383997958 F F F  
0.4412796891498161 0.1706677530125589 0.1475968220511845 F F F  
0.6136755665171378 0.6692810394424882 0.6533426291592761 F F F  
0.5453793864550676 0.3364548263717282 0.1213824057440789 F F F  
0.3879946105308534 0.8327420655497733 0.6447708737564781 F F F  
0.4462171222501183 0.8321378183129724 0.8432438600487657 F F F  
0.6127847936664423 0.3405132590343882 0.3310491405402516 F F F  
0.5501190844505928 0.6732736262651358 0.8457196901441009 F F F  
0.3869125497649364 0.1731675706951492 0.3472921034428182 F F F  
0.5550652486883152 0.8305419161456342 0.8488860313256907 F F F  
0.3868276495362437 0.3326858066209795 0.3456994369980748 F F F  
0.4414178644637730 0.6762064097256300 0.8407598883210810 F F F  
0.6411886632405057 0.1197766376560025 0.2781793859862560 T T T  
0.5491886752412043 0.1748271572638487 0.1328813765361332 F F F  
0.3856956907437663 0.6752109271840396 0.6412211330114843 F F F  
0.4371047228951142 0.3326743192981709 0.1374173049476255 F F F  
0.6163751356929552 0.8257073680317930 0.6490233554782279 F F F  
0.0013584389832815 0.2499431748960461 0.1878286030615541 F F F

0.1665538987606183 0.7519054559194771 0.6848279527286465 F F F  
0.3330095343737511 0.7541280962155597 0.8104957709971927 F F F  
0.1666852341605178 0.2509721048445641 0.3173637962641109 F F F  
0.1106816470991348 0.1704375926030863 0.1537375789240016 F F F  
0.2769262400438492 0.6729907639073502 0.6470698844999134 F F F  
0.2217901305068821 0.3306125811085039 0.1499298902834525 F F F  
0.0528726992757953 0.8306442527760822 0.6544780751830501 F F F  
0.1125928210094145 0.8311748298099886 0.8503699275028964 F F F  
0.2781657419120336 0.3301660784042255 0.3521665273733277 F F F  
0.2221813041333149 0.6731828849271579 0.8525172611049570 F F F  
0.0545127150274780 0.1709242316312540 0.3558192093125143 F F F  
0.2211172836919246 0.8329795327509615 0.8472255792631174 F F F  
0.0573431911156774 0.3304464788732773 0.3518677563469410 F F F  
0.1133559906613826 0.6726116326162526 0.8536502245883568 F F F  
0.2784378890061419 0.1717873795779852 0.3478246328302674 F F F  
0.2191151407815610 0.1711155776560176 0.1519425390546587 F F F  
0.0566952560278935 0.6718781934592570 0.6512561781519111 F F F  
0.1131203992548606 0.3305024738646196 0.1500921706275804 F F F  
0.2792806083801835 0.8327369695251789 0.6478227088715585 F F F  
0.5534968763241963 0.1463689623914419 0.6205129721175666 F F F  
0.6488341163751628 0.2510947307134970 0.5488564090148529 T T T  
0.5040586285112738 0.3452273687683345 0.5512469234183683 F F F  
0.4761242604286409 0.3089153164312464 0.6227682816706093 F F F  
0.1649965053833498 0.1424086308696886 0.1274379020731260 F F F  
0.3314073113295848 0.6457943699794129 0.6196085162470482 F F F  
0.1671907027878134 0.3590415082231431 0.1253598604816659 F F F  
0.3332130666777431 0.8609861930350320 0.6215605703184224 F F F  
0.1667446731825137 0.8601239429529244 0.8744713954654060 F F F  
0.0029464864615534 0.3589408010183988 0.3773490710418059 F F F  
0.1679363744358113 0.6446686815371834 0.8781436240630143 F F F  
0.0001441827094482 0.1428787034168550 0.3806758898193294 F F F  
0.1652516496379803 0.0697236541572721 0.0620910264668524 F F F  
0.3315470205127795 0.5722124597759475 0.5557545893012659 F F F  
0.1674817801954518 0.4326037131963218 0.0615264044606789 F F F  
0.9984225984012483 0.9314085944559736 0.5646569119283171 F F F  
0.1663318494285875 0.9325149978528344 0.9406860742978438 F F F  
0.3323503946137478 0.4333378875617697 0.4377058638718836 F F F  
0.1679309849253201 0.5713915952773263 0.9429137660433256 F F F  
0.9995203037160181 0.0696843555954132 0.4452939971275498 F F F  
0.1079794922441693 0.0340286873374183 0.0312227111156673 F F F  
0.2744131905809581 0.5338900150396739 0.5315810712273219 F F F  
0.2249827537074083 0.4697770590490862 0.0359216929539130 F F F  
0.0561381305766488 0.9682239588240833 0.5392244192077698 F F F  
0.1084941570169633 0.9668975137267779 0.9717010857330948 F F F  
0.2748053416355276 0.4660244553373047 0.4738427914677885 F F F  
0.2252202761145483 0.5375325692913222 0.9778429863678681 F F F  
0.0566759356784132 0.0358385837641606 0.4808629642828990 F F F  
0.2236228057569178 0.9680478096434655 0.9718650360183076 F F F  
0.0605200316558268 0.4673202258068940 0.4727196874273929 F F F  
0.1104137915984325 0.5343200728759641 0.9688981855910299 F F F  
0.2756680569258378 0.0363332662355589 0.4679033633508851 F F F  
0.2230929311462475 0.0351955704263176 0.0313470162336387 F F F  
0.0603379252460172 0.5347512711156810 0.5315117609587219 F F F  
0.1101660510562539 0.4665133674746897 0.0268850933516660 F F F  
0.2756355264907029 0.9687923621279992 0.5262857828250276 F F F  
0.4949804427915794 0.1434216833520523 0.1168674944082113 F F F  
0.6680127086532508 0.6398084655626946 0.6310094311592280 F F F  
0.4888905545218734 0.3629237690238156 0.1050383872631713 F F F  
0.6720602610204267 0.8516998434982739 0.6271561933129064 F F F  
0.500357775373031 0.8590635174045005 0.8717376186396351 F F F  
0.3324141806397094 0.3599090856335465 0.3737618950557575 F F F  
0.4949276037194963 0.6466801050383495 0.8672048911923085 F F F  
0.3328721635561536 0.1442548201274221 0.3729608514422509 F F F  
0.4956102528491257 0.0692051332920443 0.0561931035723191 F F F  
0.6680924872545333 0.5688462403228201 0.5618245706218730 F F F  
0.4881184774040577 0.4357175817420753 0.0426365423203379 F F F  
0.3332185064946458 0.9340179461076588 0.55737272726645572 F F F  
0.4989907722394946 0.9312361097111506 0.9381501983643332 F F F  
0.6677962025655191 0.4342638500153058 0.4348400691372021 F F F  
0.4920796174750564 0.5737441277273874 0.9293175269025298 F F F  
0.3332729356691857 0.0717457275217797 0.4382512007988808 F F F  
0.4389091334269821 0.0350460579549079 0.0193047282861301 F F F  
0.6111131536836396 0.5403043984300098 0.5169004205048893 F F F  
0.5468874375171922 0.4692280239012021 0.0150608775345162 F F F  
0.3908724608670013 0.9695239604023982 0.5280782939755468 F F F  
0.4406443198094863 0.9674128503322024 0.9612214321130210 F F F  
0.6110540197499219 0.4746042110270139 0.4542791979179341 F F F  
0.5488686591772733 0.5373728589023585 0.9595442889857182 F F F  
0.3908730098367812 0.0369504548555213 0.4694129803970881 F F F  
0.5554772651302287 0.9647748805450505 0.9769195666166439 F F F  
0.3894845657582522 0.4717358923661692 0.4618231616382928 F F F  
0.4332546380370133 0.5401167114997207 0.9559063253564517 F F F  
0.6268229006300601 0.0099206664342688 0.4325354948090165 F F F  
0.5538753070686511 0.0324262255051906 0.0348557793053317 F F F  
0.3891193141119800 0.5395445215770067 0.5197476448844256 F F F  
0.4311879839217028 0.4719894205753263 0.0123508502196970 F F F  
0.6226625245281951 0.9463739881554503 0.4984958379018423 F F F  
0.8368251413300101 0.1418806399878889 0.1269172676466823 F F F  
0.0023285175918204 0.6427245897417535 0.6272775109892166 F F F  
0.8361373575753177 0.3583165261680605 0.1318648828060205 F F F  
0.9984337343186240 0.8583558649750458 0.6294338876603902 F F F  
0.8337076035850828 0.8558219571860590 0.8819709791500969 F F F



0.6674097049946894 0.3625409570993767 0.3677993887656754 F F F  
0.8366864655425346 0.6408798612604230 0.8819258355722468 F F F  
0.6844480900207444 0.1189216781182907 0.3490933456944205 T T T  
0.8361304322352154 0.0685729868599765 0.0626683791536564 F F F  
0.0027230689737436 0.5697375319365321 0.5622597095592354 F F F  
0.8364917809835291 0.4309477198110088 0.0668628445280604 F F F  
0.6756335263927653 0.9223971417443124 0.5598925233055638 F F F  
0.8342907575738963 0.9295612354111142 0.9452088565009049 F F F  
0.0030710377425578 0.4317996945567231 0.4423683533954943 F F F  
0.8369691288996250 0.5684220871520438 0.9472574252263968 F F F  
0.6830449461419192 0.0533496886646745 0.4285696428409338 F F F  
0.7781986069482301 0.0352639914515152 0.0296838375620538 F F F  
0.9452690369426691 0.5342591933213114 0.5317670870503406 F F F  
0.8942509841201485 0.4654540723775185 0.0358182362997326 F F F  
0.7318735749359817 0.9655683669449999 0.5562369017865691 F F F  
0.7773103217563673 0.9672994354308457 0.9721987419784881 F F F  
0.9454327406249092 0.4667637960206079 0.4731010580174555 F F F  
0.8944741334507000 0.5328389421424831 0.9770318256460300 F F F  
0.7351666446882490 0.0309332370516771 0.4929517945434654 F F F  
0.8922436031463334 0.9630254542854715 0.9777840628095689 F F F  
0.7248366056367885 0.4629675629572176 0.4792297017842699 F F F  
0.7792520093045141 0.5338579790202829 0.9783635640423185 F F F  
0.9418349256227430 0.0327661683070701 0.4704755522468531 F F F  
0.8931217000005347 0.0309626492408341 0.0353187278199627 F F F  
0.7249943876268077 0.5290308855079431 0.5412228848984455 F F F  
0.7790113323227885 0.4664373282409784 0.0369568565818881 F F F  
0.9412616655327781 0.9651935692297400 0.5290019778660664 F F F  
0.0010667988477735 0.2298079771015225 0.1139411511962862 F F F  
0.1660075388991018 0.7295599230795844 0.6122673197513393 F F F  
0.3344956273021822 0.7380709797219183 0.8863991976070906 F F F  
0.1668170818298975 0.2694482505087024 0.3921522266270898 F F F  
0.0626121903397845 0.0596062035874141 0.0547458844753308 F F F  
0.1009586572943988 0.9429497713824020 0.5662923259092452 F F F  
0.2298971038844897 0.4374410873014654 0.4557457829919827 F F F  
0.2704205335013938 0.5651649629273834 0.9587287753122524 F F F  
0.2689353345115748 0.9421917649458038 0.9486224713285338 F F F  
0.1057538413432084 0.4414148895954781 0.4491920423244835 F F F  
0.0653783014644560 0.5593368308985944 0.9424122393336418 F F F  
0.2306410459071344 0.0625318435082676 0.4439434762729704 F F F  
0.2679792036107287 0.0618559352094934 0.0550637415586408 F F F  
0.1054277077903194 0.5611800306261827 0.5545991177747212 F F F  
0.0650177065066160 0.4387743159043467 0.0461231290144966 F F F  
0.2305850543772365 0.9419445179321286 0.5485950001486444 F F F  
0.2292233633978000 0.5579627101472298 0.5591374229365158 F F F  
0.0635901521291515 0.9402164208456298 0.9481453405657945 F F F  
0.2699724954036711 0.4448431345777166 0.0627979185313308 F F F  
0.1019287352058100 0.0634444236120686 0.4619470244346431 F F F  
0.3296142962687725 0.2741070516690485 0.1097729850227367 F F F  
0.5025319547698004 0.7650368120520596 0.6021460390283053 F F F  
0.6653851084279196 0.7703533089195105 0.8938550927433937 F F F  
0.4999088025977372 0.2838508826922421 0.3742634069317035 F F F  
0.3932949284689400 0.0624752837756191 0.0361704476427747 F F F  
0.4359438500182193 0.9434886638288376 0.5522385110678130 F F F  
0.5664531102244510 0.4537186730643583 0.4195010394108110 F F F  
0.5944269793091266 0.5633433002706880 0.9383061079453512 F F F  
0.6010799727251310 0.9372403986219666 0.9605542852185422 F F F  
0.4347120730719354 0.4478035628193027 0.4342878568030599 F F F  
0.3891854309652203 0.5681286050750671 0.9311847915554523 F F F  
0.5869233437867933 0.0265804044030915 0.3803101851215445 F F F  
0.5980260674502205 0.0575305701690212 0.0651413640698593 F F F  
0.4340047555603803 0.5681737245357326 0.5379957024909032 F F F  
0.3854531927776037 0.4462538442012374 0.0332850531170337 F F F  
0.5787170539961579 0.9134251529866688 0.5014412353994757 F F F  
0.5665644440631823 0.5704924717738322 0.5319116562260007 F F F  
0.3964281677973105 0.9417412432037793 0.9321301887087046 F F F  
0.5910044738635492 0.4407953864163261 0.0380536664062205 F F F  
0.4359402098636238 0.0633808545915642 0.4460168166513441 F F F  
0.6682741951760178 0.1917734392892498 0.1641485515284842 T T T  
0.8331506330762934 0.7666605613495108 0.6174233777064657 F F F  
0.0014944261982563 0.7355970412038673 0.8957353135837067 F F F  
0.8360282606255112 0.2221649359406683 0.3888757621119581 F F F  
0.7333919433181180 0.0634152954087952 0.0498129456281262 F F F  
0.7730361001988868 0.9474264486769712 0.6043255039533832 F F F  
0.9003960614827875 0.4401813388641429 0.4500370477430593 F F F  
0.9396649647129394 0.5586836340640318 0.9531046475891287 F F F  
0.9369618959698585 0.9347798672467889 0.9572590757289916 F F F  
0.7692805338180690 0.4324579572586913 0.4647520654038857 F F F  
0.7343107157805022 0.5607034907244284 0.9554944752666259 F F F  
0.8969517887564820 0.0575793930210722 0.4428571055514254 F F F  
0.9385762603922458 0.0556601635677438 0.0603301724659175 F F F  
0.7696480323070176 0.5504418017854107 0.5752729261168952 F F F  
0.7339015657604548 0.4401675475780991 0.0602962382036125 F F F  
0.8958948857542737 0.9377415107969824 0.5475494895599482 F F F  
0.9000900272385266 0.5604931425237254 0.5548657468965388 F F F  
0.7318225689797586 0.9427584228835926 0.9470277002671850 F F F  
0.9392034656679371 0.4385609809697684 0.0585965054464239 F F F  
0.7788235615748036 0.0644855967113855 0.4917857268999128 F F F  
0.5416040281997567 0.1133346587274673 0.5603003674020286 F F F  
0.6812216021103623 0.2266143338094437 0.5038380044601496 T T T  
0.6211442323180734 0.2103585577815963 0.5756561879084643 T T T  
0.5165677208344306 0.1788507450226362 0.6317182926179115 F F F  
0.5811736399941907 0.2633067195863177 0.2225204655890920 T T T

Structure O2+H2O/1 S=6  
1.0000000000000000  
20.9172000884999996 0.0000000000000000 0.0000000000000000  
0.0000000000000000 17.8076000213999990 0.0000000000000000  
0.0000000000000000 0.0000000000000000 12.2158002853000003  
Al O C H Fe  
10 64 96 64 2  
Direct  
0.0814161404328103 0.2499404097466158 0.2522179640809906  
0.2492646530211976 0.7524381723625828 0.7527357501666649  
0.2455347589328889 0.2496064590553908 0.2516079265146293  
0.0829575015753368 0.7512103880758101 0.7522612459522841  
0.5842629965372507 0.7480993538358580 0.7447630079717202  
0.4164311479587062 0.7519108751441864 0.7453683828777435  
0.7541625624399936 0.2499930615980969 0.2538856429681091  
0.9168625736353898 0.7483469472842369 0.7535473560982046  
0.9174664251945971 0.2504055379430302 0.2526212375098956  
0.7508994323704539 0.7460713285252852 0.7539081166566614  
0.6742578293208012 0.2466921363584851 0.1823936002653384  
0.8341358790476060 0.7470993340651897 0.6883500279722453  
0.0000611259420216 0.7493872681841038 0.8184601959730627  
0.8357004575337221 0.2487484411843210 0.3200835218120733  
0.7813913267384390 0.1704337574530556 0.1500494648377871  
0.9472024846198113 0.6697882293772465 0.6521613084602429  
0.8890090512342450 0.3291657944749344 0.1542877829338339  
0.7243209686386257 0.823845818521891 0.6499644266273210  
0.7779481661939858 0.8272154848423108 0.8543892457166846  
0.9466140366813899 0.3303320574657340 0.3513255132935680  
0.8894992314870432 0.6684726258859983 0.8528955450160580  
0.7286132938097188 0.1675511234316289 0.3544596635261475  
0.8867756645869449 0.8270565755882553 0.8551254920108818  
0.7223680997109748 0.3271608144652136 0.3548656859761787  
0.7808674480374300 0.6684984678435704 0.8538270561052979  
0.9438822271393712 0.1705750496135465 0.3544742092999595  
0.8898967046236705 0.1691813459687035 0.1502499842015743  
0.7223023046652083 0.6663835328031481 0.6568080271657522  
0.780805550681625 0.3312240897139297 0.1591817553543775  
0.9438122710850056 0.8288320437094888 0.6539862435280777  
0.3260872913191719 0.2516616991301864 0.1803431745927683  
0.5001547850896626 0.7502678482515985 0.6785084844144594  
0.6668441843208786 0.7476467293507347 0.8156205002450242  
0.5003661874673749 0.2540692114586104 0.3209381313141660  
0.4518507593988659 0.1656320984099673 0.1451435150381381  
0.6136984522498863 0.6689602530209131 0.6488050499204040  
0.5509556297438412 0.3312053403751740 0.1344917197824228  
0.3872074763142159 0.8308286159773690 0.6484003237299485  
0.4481855918822624 0.8298874772783114 0.8445421973140039  
0.6145107888153548 0.3352940942486571 0.3447402072425760  
0.5525106190110988 0.6710319810216925 0.8427828032679032  
0.3829973025192849 0.1653851683955478 0.3461724322524358  
0.5571025878194549 0.8275968260058113 0.8440633781589896  
0.3833616330700853 0.3326771175169443 0.3555740417584342  
0.4438001363882630 0.6730217312543482 0.8435550705385269  
0.6200387148522415 0.1668687101881311 0.3619812227346210  
0.5601454865029757 0.1630460859519670 0.1500398069373945  
0.3847751404852756 0.6734353004744591 0.6454658737017148  
0.4422466865528424 0.3329475544119271 0.1379622000309766  
0.6154661048665264 0.8249949288027252 0.6432766979254622  
0.9993459230895233 0.2495498917455206 0.1867173932778239  
0.1660157205554837 0.7512194058135130 0.6869054702358951  
0.3333346505149756 0.7523221978916671 0.8150154950551591  
0.1638127358509310 0.2502741721939598 0.3179543023824312  
0.1080489634785426 0.1702745501397347 0.1525785383077751  
0.2759563568095744 0.6726181890324467 0.6517520637293878  
0.2188495445535691 0.3303915836967536 0.1513947348608703  
0.0523882149039548 0.8301404426138540 0.6540156850448932  
0.1115560066036027 0.8306713807921037 0.8505672466013788  
0.2745666154542475 0.3297363231855688 0.3544879675515210  
0.2209308140416377 0.6728403197821378 0.8554525502868920  
0.0524919245428292 0.1701589073687645 0.3545102984601937  
0.2201562285781239 0.8319518456523332 0.8503918758584711  
0.0550020873511621 0.3296421326539492 0.3515493654503531  
0.1120746906210156 0.6721015383643794 0.8540543559159559  
0.2747059045100128 0.1693579940871482 0.3488587308277550  
0.2163923366989523 0.1704289874166942 0.1530352375317366  
0.0559586110598006 0.6711384715273014 0.6508053767546701  
0.1102783020575317 0.3300675110953402 0.1499010077491573  
0.2784950997303101 0.8304832112949143 0.6525505219244091  
0.5736205470030861 0.1725675591556348 0.5794361081129156  
0.6788687843578468 0.2740016342451316 0.6042463910395854  
0.4991819172440431 0.3447514921616910 0.5505642731685418  
0.4705203718867320 0.3031492330101290 0.6147074146036411  
0.1624499175863682 0.1420406465038913 0.1271429865774253  
0.3301258335349505 0.6448981328617014 0.6239860860933979  
0.1644467790375380 0.3586728298975315 0.1257393723687158  
0.3322981732988564 0.8585676612494925 0.6251064272511455  
0.1655997760772689 0.8594892376406923 0.8756844183047682  
0.0007263801702150 0.3584708058633544 0.3766744639206990  
0.1665019709941840 0.6441649587384304 0.8794691388125498  
0.9982664498816820 0.1419697717966042 0.3795086316154707  
0.1630088494168089 0.0695873075929399 0.0614991248755166

0.3292033931550949 0.5717812075402902 0.5599752115254658  
0.1650079993963355 0.4319969006427046 0.0615852547850850  
0.9977040819714279 0.9306572801832675 0.5636363346770578  
0.1648156176073178 0.9322231361609423 0.9409047717360108  
0.3280255807670123 0.4333667260134647 0.4423430236084550  
0.1661480080281516 0.5707350599044325 0.9434613639212098  
0.9979226765565722 0.0687913485091862 0.4440451115552237  
0.1059028671156611 0.0336624340934406 0.0303740266439062  
0.2714698965007289 0.5347436794890543 0.5358528844222213  
0.2227221423948088 0.4687312069675367 0.0360835798874631  
0.0552078560756852 0.9677221171083125 0.5377005733402936  
0.1067774412495176 0.9664192860133279 0.9711937556454209  
0.2708554931413933 0.4669220076590589 0.4780887039466332  
0.2233058266914254 0.5365270775834690 0.9782078004826579  
0.0553093215504938 0.0352857727680147 0.4792171834899468  
0.2219375398977458 0.9681719929180818 0.9719162758130777  
0.0587433491164773 0.4666555321937129 0.4712119336267215  
0.1084319733460304 0.5339538985234810 0.9688809880771895  
0.2716527752511346 0.0307996043982756 0.4683694578539410  
0.2210565265848797 0.0354525810306628 0.0310101821907546  
0.0590086598622749 0.5341047239874351 0.5299414628762578  
0.1078384751905315 0.4661171283289431 0.0266979987415823  
0.2728731915228293 0.9637669565354499 0.5278421435273072  
0.5056775539167323 0.1360741754089482 0.1221774759327537  
0.6682493030785147 0.6397623095193119 0.6273733120654323  
0.4967515858882290 0.3603849928810176 0.1116381580850174  
0.6706817797651660 0.8521521891946903 0.6211865092685862  
0.5030023970001927 0.8563986372767228 0.8696215093703970  
0.3283893977589288 0.3596693755123386 0.3792563664185089  
0.4979947670808935 0.6439094441124028 0.8677744466046760  
0.3283059912307240 0.1391939664438079 0.3730307574131620  
0.5057460624332876 0.0638729872419877 0.0573480076146444  
0.6686692800152282 0.5678092274678280 0.5615276056749814  
0.4969302637570484 0.4335473575504573 0.0482355333868391  
0.3311474658744083 0.9307318352825363 0.5594129287951357  
0.5042263441257588 0.9282581619766306 0.9357699292049029  
0.6693725702022782 0.4316533423272132 0.4406458481033254  
0.4973963185874959 0.5712271393874870 0.9314609635367666  
0.3287177122274033 0.0670625119380132 0.4385248690012517  
0.4477263665406659 0.0316645841311390 0.0234225225290052  
0.6117073696192561 0.5380387089638747 0.5184595229361016  
0.5547834869251423 0.4678857736106441 0.0177132840249727  
0.3882187375311137 0.9671828247587528 0.5296867899645311  
0.4469712015309516 0.9649070695712481 0.9636912684814047  
0.6121245328348517 0.4712693266295322 0.4586806145635448  
0.5549872278023685 0.5356734326663983 0.9603235390171982  
0.3870410111073538 0.0341137972084519 0.4701799094772049  
0.5623002526472456 0.9605400422363384 0.96973404743742122  
0.3857253802176552 0.4706235722857002 0.4662799577133026  
0.4395432283600880 0.5367763984153707 0.9615784025691129  
0.6187035323760036 0.0209715209465888 0.4493619331321350  
0.5631021123939572 0.0272084001016385 0.0298713610090532  
0.3863799402987890 0.5383246934288155 0.5240543646405803  
0.4393296287595349 0.4691046227850753 0.0192306857987960  
0.6173142508271743 0.9531346815198138 0.5063951877494294  
0.8354304777567071 0.1412620863965398 0.1250694506716097  
0.0015661291555279 0.6423114636775562 0.6263217812121018  
0.8348480308330397 0.3585191603760502 0.1311333472722075  
0.9979639699785123 0.8577573974937169 0.6287414612272249  
0.8324357535419693 0.8554223773918557 0.8794204576974827  
0.6692972957413519 0.3595303164817909 0.3760073836027762  
0.8351506912673999 0.6403577073624329 0.8789050878870210  
0.6749067009966750 0.1377228158687678 0.3805963140610744  
0.8344277092552860 0.0678659590542867 0.0610857780413950  
0.0016175010443712 0.5693752257633122 0.5611521964277916  
0.8346896720599900 0.4309025553721959 0.0656701616699599  
0.6727773713093662 0.9243130259171499 0.5557942018744561  
0.8327704919388186 0.9289004589970117 0.9433773870094454  
0.0010767764038020 0.4314075509187235 0.4413914330625220  
0.8350853690205385 0.5679349544363969 0.9446783913161275  
0.6754923901868514 0.0628245682592492 0.4398164655726662  
0.7765811012859198 0.0348311847155233 0.0269921703550353  
0.9439363677988092 0.5342346580515928 0.5310344474501252  
0.8923682753526945 0.4656408473431716 0.0349861346991500  
0.7298566625609301 0.9654486801955902 0.5449830693162417  
0.7757596720989551 0.9669168160215718 0.9693517277739235  
0.9436506257172175 0.4667205469499474 0.4724172390425099  
0.8925625534092867 0.5327642308758007 0.9756285888223483  
0.7312041252373755 0.0335161559563427 0.4880139372469572  
0.8905994291247463 0.9618884574428693 0.9774618285754801  
0.7262605007518043 0.4613336249424995 0.4835965034249917  
0.7773700447405809 0.5331028089404639 0.9753401206041283  
0.9404448455763936 0.0315757684715293 0.4696240491839992  
0.8913857304635088 0.0297888859690027 0.0350554383716331  
0.7259312232092441 0.5283836224094405 0.5428738755540278  
0.7771385326255859 0.4659375476236006 0.0347151995465167  
0.9403182238780192 0.9640676499591438 0.5282824135587292  
0.9991984640923869 0.2309332794209774 0.1120085506844256  
0.1663095819410462 0.7296488218666090 0.6138624087272210  
0.3347837065491037 0.7355812529747854 0.8906196208616326  
0.1635817590168125 0.2694859245569319 0.3923438014277982  
0.0604187574652904 0.0591244038698076 0.0535018329721314

0.1002002108271398 0.9427449272624008 0.5645100679723747  
0.2256098410896883 0.4390939096744467 0.4599494700724229  
0.2686373301009463 0.5638738564929401 0.9591125415814528  
0.2673731958120961 0.9425432266807217 0.9488434829322927  
0.1037855267273214 0.4404807209923025 0.4472726056721418  
0.0635782642085270 0.5592805317661611 0.9421194282430821  
0.2262711944248263 0.0559519417589009 0.4439293298231559  
0.2657864942232966 0.0625445939167364 0.0545634483819684  
0.1042722272934792 0.5602995796191952 0.5525805106576699  
0.0625644607429287 0.4385755487499685 0.0456497937819336  
0.2283550498910294 0.9360030146039796 0.5507841854461624  
0.2267203599602897 0.5597939961953793 0.5636257163021172  
0.0620447852064796 0.9394334475862484 0.9474267733322110  
0.2676193194170962 0.4435002315465620 0.0628165750210517  
0.1003791864318564 0.0631700618333449 0.4599193358643192  
0.3252094141214704 0.2828332240184382 0.1148324288289247  
0.5002428256483347 0.7619110818412036 0.6008944048550183  
0.6653409762147341 0.7677421491015723 0.8894741697000745  
0.5009151512210156 0.2921043153987131 0.3785188240912690  
0.4032700884913408 0.0601124350128677 0.0448583133617096  
0.4337249220704771 0.9425049592047431 0.5544331388777196  
0.5677103574431220 0.4490717753944813 0.4249727948077500  
0.5999748344545092 0.5620284294491873 0.9365168528495765  
0.6069839976030870 0.9326949151330367 0.9479561182293701  
0.4305120703566034 0.4456984759392404 0.4386623502170029  
0.3946607326019698 0.5637309529447234 0.9386270724442966  
0.5751696184017229 0.0425810548148658 0.4116974590991752  
0.6084028574034587 0.0515735642553904 0.0563184596803086  
0.4315950196006795 0.5661884640232793 0.5424069436622493  
0.3942250209859407 0.4428794677183812 0.0425980333892229  
0.5727450355770153 0.9217548770574064 0.5139621428225066  
0.5670023252283738 0.5680955630441752 0.5326232459318958  
0.4017815941133850 0.9402620238385053 0.9373850342199723  
0.5996517105252230 0.4404998437703748 0.0395624616067867  
0.4316248126153669 0.0618697999420744 0.4475084067024016  
0.6754141489473955 0.2146660074748887 0.1177756314835222  
0.8336432196275650 0.7656475317993469 0.6135955725083287  
0.0004405145112641 0.7341023584497927 0.8947511879184371  
0.8363893415152700 0.2198808892154386 0.3876071851577866  
0.7317127765888970 0.0631478035082018 0.0462271734220080  
0.7731715974059967 0.9437677627331899 0.5834465703588310  
0.8984236163036801 0.4404499858601776 0.4496817493614468  
0.9377699885847258 0.5587288109309779 0.9521789640510800  
0.9353219511950617 0.9333272536024887 0.9579713144603383  
0.7707228282791280 0.4306607748470339 0.4702697422576091  
0.7323755886084706 0.5594774313733020 0.9515577469907190  
0.8953851783883954 0.0560898622277530 0.4422705215560205  
0.9367392304553437 0.0541711857735208 0.0611803426959076  
0.7702955417012313 0.5509323894280986 0.5763399941878448  
0.7319587545833514 0.4396634906882777 0.0577450326349781  
0.8951494119295753 0.9363397192853832 0.5473344178545958  
0.8989358558313189 0.5607522675537199 0.5544481516796590  
0.7303616999139760 0.9426363138882103 0.9431713015827959  
0.9372819652973118 0.4390566975407413 0.0586803101187417  
0.7757349029264929 0.0651232868177821 0.4817091399184259  
0.5760910591324686 0.1700776710178213 0.4989763032030851  
0.7075814526056768 0.2578611290979376 0.5462210150384020  
0.6430552783546353 0.2379170361133011 0.6020346858594192  
0.5317641634846997 0.1933541594662944 0.5961489835988165  
0.4142373592017686 0.2485847568751852 0.2462565070990714  
0.5861547476896891 0.2518730020790711 0.2448270896069018

Structure O2+H2O/1 monomeric Fe S=7/2  
1.0000000000000000  
20.9172000884999996 0.0000000000000000 0.0000000000000000  
0.0000000000000000 17.8076000213999990 0.0000000000000000  
0.0000000000000000 0.0000000000000000 12.2158002853000003  
Al O C H Fe  
11 64 96 64 1  
Direct  
0.413660556102741 0.2487215184323759 0.2467832595583999  
0.0824369047041700 0.2498822454366674 0.2524887831961396  
0.2493331310037909 0.7523321561778832 0.7519327741801497  
0.2476668279809573 0.2494042380793514 0.2501262246359686  
0.0830029549509442 0.7511523263647846 0.7523061284562480  
0.5841227049856886 0.7480508158202354 0.7459880793008988  
0.4163761137938236 0.7514506180354565 0.7453596483316111  
0.7539135359337573 0.2501400396517887 0.2534569497739312  
0.9169015152159453 0.7485013593780477 0.7533916148841036  
0.9179183281474904 0.2504499351272907 0.2525321627613756  
0.7508899309901715 0.7465213142073958 0.7541867562867750  
0.6732201320278521 0.2470219205375689 0.1833099754310784  
0.8340908641361149 0.7474652166935664 0.6884014082756563  
0.0001026243813725 0.7494368195952553 0.8184084679034875  
0.8357873898149232 0.2487657323052673 0.3196871636757907  
0.7816519649637190 0.1706595278037670 0.1498902866465542  
0.9471885074973379 0.6698657755715003 0.6519738019130982  
0.889474171442190 0.3292761280776674 0.1542145039389445  
0.7241046895527261 0.8245234102861978 0.6505899970957127  
0.7780571890013248 0.8274588964971291 0.8546501746973377  
0.9470931893460273 0.3302309253611564 0.3512223776287094  
0.8895546371075385 0.6686905921821129 0.8526790186456730

0.7278132416731385 0.1679495257160536 0.3540888370559674  
0.8868901264046941 0.8272034298055104 0.8550650804743111  
0.7222935915422649 0.3273436699612037 0.3544323755351271  
0.7809212368181885 0.6687796182711191 0.8539949438737683  
0.9443497159528798 0.1706802795071530 0.3543929544658265  
0.8902399661598497 0.1694103362213119 0.1502393035626614  
0.7223923050500631 0.6669149654182918 0.6569934628481945  
0.7811965613455050 0.3312066976897515 0.1586805977761394  
0.9438792448587801 0.8288822615122998 0.6539012915732589  
0.3309252449667202 0.2506812874653453 0.1821481382523467  
0.5001871366169240 0.7500038370511729 0.6793561341298956  
0.6666871715814058 0.7479304458907959 0.8162931703619007  
0.4946614936215288 0.2530123881721811 0.3166570095749754  
0.4471440450232653 0.1680675423078166 0.1491247130285777  
0.6137878990053142 0.6690486881272132 0.6495203943103272  
0.5495043090706333 0.3303559609390009 0.1369128821770615  
0.3873237404410865 0.8309172064810739 0.6479429791896011  
0.4477729690035134 0.8296412055282356 0.8451800625150390  
0.6142021080188044 0.3345176554616776 0.3466043328036271  
0.5523540193118595 0.6699047286619924 0.8439568281139614  
0.3848707097986767 0.1687289929024264 0.3434559596542113  
0.5566241980510036 0.8281627234414408 0.8456000474462262  
0.3845941116841406 0.3306663402084248 0.3496056184296539  
0.4436866384602945 0.6719212442804419 0.8437409282567684  
0.6191397903354887 0.1668683548729270 0.3611886049308643  
0.5556319115673903 0.1646436279947011 0.1513746466016068  
0.3848479863306811 0.6727266180960069 0.6449664457888697  
0.4407757978643213 0.3298088056857448 0.1433344031780260  
0.6152360257407045 0.8253981571019637 0.6441412555541357  
1.0001188265754504 0.2495441413895505 0.1868648548260790  
0.166111825866735 0.7510924163068269 0.6866283512101690  
0.3333061199746832 0.7518963780575326 0.8143233900925159  
0.1651912691255694 0.2501316138901652 0.3170883680932782  
0.1091872935955940 0.1702545226361825 0.1529850146554314  
0.2760636611513128 0.6718289405323642 0.6507250312623301  
0.2204578031347923 0.3297694351459913 0.1499545220152118  
0.0524572613568763 0.8300831789928461 0.6539804191321666  
0.1116616631905110 0.8306523313083124 0.8505174236501926  
0.2758971119871266 0.3289692941433560 0.3527012479389511  
0.2209703849767128 0.6727090204228665 0.8550704743905817  
0.0530087139526331 0.1701447878362800 0.3547083141783390  
0.2202622347469926 0.8318317244184208 0.8500454616151998  
0.0555335720792905 0.3296635181672430 0.3515962409564077  
0.1121152700904935 0.6719711694391438 0.8541491580593260  
0.2764537460169865 0.1698475603344893 0.3470678237789380  
0.2176656278437621 0.1707758966956696 0.1514695695127735  
0.0559517519510033 0.6711088519252459 0.6508849168870355  
0.1117179665940216 0.3297397460583454 0.1502016647874966  
0.2786620398215878 0.8310623110073253 0.6516705728089627  
0.5731087610595206 0.1729489447968168 0.5784069448740948  
0.6784829624374996 0.2741175805235043 0.6041758714619087  
0.4990889179319129 0.3455378489198637 0.5525369976305298  
0.4696122649617958 0.3044886866905307 0.6164080055112705  
0.1635253183800229 0.1422333163664483 0.1267775375864861  
0.3302689857239023 0.6440233030715480 0.6231826567065725  
0.1658390930148896 0.3581896579641305 0.1254309291514147  
0.3325711349256069 0.8590980326242545 0.6244261678373834  
0.1657448258989412 0.8594136977167304 0.8755628239391211  
0.0011946752551686 0.3583963800616953 0.3766371766685436  
0.1665823457776890 0.6440508271457821 0.8794332182898112  
0.9987107313233092 0.1420408225696267 0.3795425693214530  
0.1636850283622678 0.0696320493098800 0.0614030488371725  
0.3296960359931383 0.5706282298495587 0.5589992230630634  
0.1659010094613247 0.4317260987154546 0.0616234220867984  
0.9978349701963851 0.9306699969399875 0.5636324898869244  
0.1650568946028913 0.9321430421383254 0.9409171271741469  
0.3296821290172844 0.4318026691277487 0.4403842832920183  
0.1663845668704813 0.5706401067939220 0.9436316995161402  
0.9982080735994606 0.0688360242702617 0.4440858446244587  
0.1064499812253117 0.0338155899238184 0.0305734252738032  
0.2723089699728879 0.5329102984410529 0.5343765977146727  
0.2234032166743250 0.4688124037616827 0.0359751437097065  
0.0553704318679575 0.9676795768982150 0.5377780967729403  
0.1071175120169816 0.9665302453151008 0.9714268535957636  
0.2722802068838526 0.4650662412559821 0.4763873467872028  
0.2236731954323189 0.5366571980910909 0.9782121337067912  
0.0555434791552715 0.0352525950906086 0.4793246866734198  
0.222629602259615 0.9679492312281394 0.9717983742583519  
0.0589474042898914 0.4667118166353282 0.4713123091096432  
0.1088238825232320 0.5335816636513678 0.9693540687136567  
0.2734696762473558 0.0325534070041314 0.4666693201571278  
0.2215865315850521 0.0352638097989852 0.0307998163273192  
0.0591024614939699 0.5341680779682112 0.5300246426690961  
0.1085421869316311 0.4656854991953677 0.0271143443121812  
0.2740085117149100 0.9654374782141218 0.5263198874979537  
0.5007906796410906 0.1381418532926594 0.1245581447396228  
0.6683790039473686 0.6400486479199616 0.6277712865420276  
0.4946906576123595 0.3583613499923744 0.1150982950550239  
0.6703856142483591 0.8526763526159551 0.6218256466726878  
0.5023300797137765 0.8567976616652659 0.8706412661132454  
0.3301506191900548 0.3582845603945065 0.3760995514246221  
0.4977694089482285 0.6426490456244475 0.8685224117858104

0.3306914939985030 0.1410780319938947 0.3708977576958135  
0.5015912452115757 0.0656849819981375 0.05888377339903847  
0.6689672452500496 0.568055539785407 0.5618395889129267  
0.4948649334415652 0.4315069129258283 0.0506277448267817  
0.3318757548119057 0.9316487754105984 0.5586744463799509  
0.5026103916668757 0.9291525146761149 0.9366215579407081  
0.6696580715222459 0.4316648343200350 0.4409284385467426  
0.4967175330396617 0.5696425754522810 0.9324985475881181  
0.3308162536798617 0.0686842973094814 0.4369480561329140  
0.4443913780907382 0.0320501618120082 0.0236839422827355  
0.6120563923657579 0.5381803592435401 0.5187638861652399  
0.5529749521094262 0.4655578576540566 0.0198847934706201  
0.3891219884973529 0.9679239825920701 0.5292359103636552  
0.4448962297472201 0.9651427947735400 0.9638642149844934  
0.6124966662754369 0.4713735967077817 0.4590514588868355  
0.5538767321580205 0.5333130592443013 0.9621150489745347  
0.3886087163586802 0.0349510711401120 0.4695430012967800  
0.5599637189397472 0.9628098695812545 0.9715263321015000  
0.386940058629581 0.4697752212127729 0.4649248950429459  
0.4386854897993491 0.5354805823853614 0.9626190093080234  
0.6181914693418388 0.0211834643333470 0.4491695984709679  
0.5594965800735596 0.0296516973719362 0.0316490728037255  
0.3870270508818779 0.5374560087862734 0.5230773192739877  
0.4377724199881005 0.4678404820607341 0.0207434895757496  
0.6168981111992948 0.9535042949853824 0.5066334818613022  
0.8357543527330020 0.1415159331191500 0.1250756795651861  
0.0015579628876569 0.6423235041756882 0.6262843987349389  
0.8353073979353722 0.3585521297861857 0.1309002150580071  
0.9980588856138436 0.8577609970365040 0.6286938867109890  
0.8326065672676594 0.8556185400419121 0.8795204919032725  
0.6691734074112435 0.3592911647745814 0.3765145231999925  
0.8352274128468019 0.6405932336528964 0.8788445026045801  
0.6741703888912122 0.1379622590817853 0.3799467943391285  
0.8348515747123957 0.0680613501032766 0.0611609428668105  
0.0016622011206745 0.5693600637365768 0.5611565236781522  
0.8352051966570802 0.4310064792318350 0.0654685706953680  
0.6724071521911386 0.9248023949208001 0.5560639723140058  
0.8330535125623139 0.9290847914633337 0.9434709138145707  
0.0013541252087338 0.4313496086915126 0.4414040988647208  
0.8353008575350378 0.5681274911735482 0.9445416466973786  
0.6749081187742439 0.0631080821774111 0.4392611085606170  
0.7769838877588762 0.0350604765165467 0.0271516739398499  
0.9440382003875865 0.5341043197331244 0.5309839183480690  
0.8928228005337731 0.4658914975845568 0.0346722915289847  
0.7294553932768767 0.9659820280745709 0.5447279262966707  
0.7760851314023409 0.9671508577348157 0.9695212273297318  
0.9438624203402268 0.4665734323143767 0.4723774294602636  
0.8928531418886777 0.5330470527765265 0.9753447873270330  
0.7307010408426822 0.0339272593818470 0.4873912221163026  
0.8909271056827093 0.9620145656749038 0.9774759861408953  
0.7265908662386213 0.4615030057167406 0.4837944222597854  
0.7776738532933379 0.5331598639069455 0.9753122036910736  
0.9406818163945138 0.0316787030342465 0.4696129799810450  
0.8917937125523389 0.0299259105448570 0.0350690049291154  
0.7262356040683570 0.5286149613629367 0.5430741586417938  
0.7776083116681879 0.4659731184205551 0.0346325370635691  
0.9404813776949468 0.9641553197094457 0.5282528326517562  
0.9999815869891159 0.2307954136450409 0.1122193214809271  
0.1662237603153997 0.7295039836087370 0.6135938204523461  
0.3345773397737408 0.7356150619433059 0.8901643109479470  
0.1652551988354728 0.2691551837980553 0.3915926216853853  
0.0610152300476989 0.0593689885797950 0.0538225678792904  
0.1003298213571849 0.9426460924879284 0.5646336759789226  
0.2270689915981513 0.4371368153081407 0.4582287944413417  
0.2688924717026142 0.5642053085154868 0.9590097080292019  
0.2676290105996370 0.9421986684140975 0.9486629835549696  
0.1040255096372298 0.4405987154863644 0.4474397408998220  
0.0638262596460221 0.5586997413353150 0.9428364555880595  
0.2280948648024975 0.0577110806608537 0.4421058466075953  
0.2663655209878886 0.0622650768761905 0.0542623134646922  
0.1043251738624119 0.5604378112816618 0.5527109218471986  
0.0633379450846199 0.4380063921690320 0.0461943290178825  
0.2291262774039895 0.9381989188263541 0.5487225054443856  
0.2272598554313709 0.5574480978454243 0.5618329744138552  
0.0622803529327018 0.9396929101754260 0.9478482946829638  
0.2683850179414613 0.4437178754009418 0.0625247584492856  
0.1006403755829947 0.0630917625890332 0.4600915010244465  
0.3301640624501948 0.2796639940140755 0.1146742253404377  
0.5004864345927137 0.7616856286159097 0.6017339769584507  
0.6653197004397503 0.7684936394884418 0.8898904853974728  
0.4945930419435236 0.2895552504234728 0.3761113413894297  
0.3992957586600668 0.0594057268636840 0.0441715564078915  
0.4344547475652292 0.9429939793896989 0.5543497122462550  
0.5681121777222383 0.4490838431880837 0.4253984752004275  
0.5992447126689461 0.5589959163129696 0.9387235214045688  
0.6052345255739207 0.9358887147857153 0.9506189399783667  
0.4320066507575478 0.4455118857895235 0.4373971696382050  
0.3939798183265480 0.5627148637171263 0.9393754110666453  
0.5746218061585433 0.0426276835251655 0.4114208506645464  
0.6045836165958979 0.0544886898450478 0.0582923575627907  
0.4320817354253031 0.5656076549728861 0.5416170585365144  
0.3923018586834852 0.4423502175109905 0.0437755427152176

0.5723257022217654 0.9221800651143360 0.5145144752039573  
0.5673260498565921 0.5681619939995712 0.5329305248048805  
0.4001205810546988 0.9397528946872551 0.9369664475255194  
0.5977858045675033 0.4380713240640891 0.0418786685628551  
0.4335100630783179 0.0621897115652220 0.4474141149498783  
0.6746500378691490 0.2178138318559879 0.1159468362708347  
0.8335780315118747 0.7655323171496329 0.6134004485617410  
0.0004025771103157 0.7340785653478913 0.8946696912015409  
0.8366325352089322 0.2202579963759416 0.3875302118368057  
0.7321622694733823 0.0634387560383140 0.0464985993746365  
0.7728766305941238 0.9444779856941100 0.5830588849190003  
0.8986598988509168 0.4402452847499084 0.4496269601155062  
0.9379939870029467 0.5591388629285285 0.9517857456433066  
0.9356128503398550 0.9333877392063952 0.9579044305322371  
0.7711803545690173 0.4310287504244419 0.4706327861101552  
0.7326108505761596 0.5594322167838328 0.9516762439290890  
0.8956350653328621 0.0562318227407480 0.4422589670126851  
0.9372081430032171 0.0542130014884368 0.0610890982922443  
0.7706115553656279 0.5511912078049652 0.5765382012213026  
0.7325000285150272 0.4395915951415411 0.0577800766491683  
0.8952831243673045 0.9364732002625457 0.5472733174899090  
0.8989915664354973 0.5605465190158062 0.5543398317907821  
0.7306559518775346 0.9429184791615469 0.9434114542520536  
0.9378409432473619 0.4394694175763882 0.0581903508163345  
0.7752171558054101 0.0655409115863682 0.4807218596778056  
0.5754191084362933 0.1701571726439701 0.4979647960125185  
0.7073511990545708 0.2579896674488920 0.5463712012862213  
0.6425689899253680 0.2381981828836744 0.6014327119618337  
0.5310216956294070 0.1929582770507822 0.5953922751705367  
0.5841074506616273 0.2516601345371646 0.2467087666317535
